# Supplementary material
Source: PubMed Central journal article supplement (PMC8152574)
Supplement: NIHMS1561287-supplement-Supplemental.pdf [file NIHMS1561287-supplement-Supplemental.pdf]

## Iridium-Catalyzed Enantioselective and Diastereoselective Hydrogenation of 1,3-Disubstituted Isoquinolines

Alexia N. Kim,<sup>+,1</sup> Aurapat Ngamnithiporn,<sup>+,1</sup> Eric R. Welin,<sup>1</sup> Martin T. Daiger,<sup>1</sup>  
Christian U. Grünanger,<sup>1</sup> Michael D. Bartberger,<sup>2</sup> Scott C. Virgil,<sup>2</sup>  
and Brian M. Stoltz\*<sup>,1</sup>

<sup>1</sup> *Warren and Katharine Schlinger Laboratory of Chemistry and Chemical Engineering, Division  
of Chemistry and Chemical Engineering, California Institute of Technology, Pasadena,  
California 91125*

<sup>2</sup> *1200 Pharma LLC, 844 East Green Street, Suite 204, Pasadena, California 91101  
stoltz@caltech.edu*

### Table of Contents:

|                                                                                      |        |
|--------------------------------------------------------------------------------------|--------|
| Materials and Methods .....                                                          | SI 2   |
| List of Abbreviations.....                                                           | SI 3   |
| Syntheses of Hydroxymethyl 1,3-Disubstituted Isoquinolines .....                     | SI 3   |
| Syntheses of 1,3-Disubstituted Isoquinolines with Different Directing Groups.....    | SI 28  |
| General Procedure for Hydrogenation Reactions .....                                  | SI 31  |
| Additional Optimization Results .....                                                | SI 47  |
| Experimental Procedure and Characterization Data for Product Transformations.....    | SI 48  |
| Determination of Enantiomeric Excess.....                                            | SI 52  |
| Crystal Structure Analysis of Product <b>8p</b> (sample No.: d19110).....            | SI 57  |
| Determination of Relative and Absolute Configuration of <b>12e</b> (VCD and OR)..... | SI 65  |
| References .....                                                                     | SI 69  |
| NMR and IR Spectra of New Compounds .....                                            | SI 70  |
| SFC Traces of Racemic and Enantioenriched Compounds .....                            | SI 283 |

## Materials and Methods

Unless otherwise stated, reactions were performed in flame-dried glassware under an argon or nitrogen atmosphere using dry, deoxygenated solvents.<sup>1</sup> Solvents were dried by passage through an activated alumina column under argon. Reaction progress was monitored by thin-layer chromatography (TLC) or Agilent 1290 UHPLC-MS. TLC was performed using E. Merck silica gel 60 F254 precoated glass plates (0.25 mm) and visualized by UV fluorescence quenching, *p*-anisaldehyde, or KMnO<sub>4</sub> staining. Silicycle SiliaFlash® P60 Academic Silica gel (particle size 40–63 nm) was used for flash chromatography. <sup>1</sup>H NMR spectra were recorded on Bruker 400 MHz or Varian Mercury 300 MHz spectrometers and are reported relative to residual CHCl<sub>3</sub> (δ 7.26 ppm). <sup>13</sup>C NMR spectra were recorded on Bruker 400 MHz spectrometer (100 MHz) and are reported relative to CHCl<sub>3</sub> (δ 77.16 ppm). <sup>19</sup>F NMR spectra were recorded on Varian Mercury 300 MHz spectrometer (282 MHz). Data for <sup>1</sup>H NMR are reported as follows: chemical shift (δ ppm) (multiplicity, coupling constant (Hz), integration). Multiplicities are reported as follows: s = singlet, d = doublet, t = triplet, q = quartet, p = pentet, sept = septuplet, m = multiplet, br s = broad singlet, br d = broad doublet, app = apparent. Data for <sup>13</sup>C NMR are reported in terms of chemical shifts (δ ppm). IR spectra were obtained using Perkin Elmer Spectrum BXII spectrometer or Nicolet 6700 FTIR spectrometer using thin films deposited on NaCl plates and reported in frequency of absorption (cm<sup>-1</sup>). Optical rotations were measured with a Jasco P-2000 polarimeter operating on the sodium D-line (589 nm), using a 100 mm path-length cell and are reported as:  $[\alpha]_D^T$  (concentration in 10 mg/1 mL, solvent). Analytical SFC was performed with a Mettler SFC supercritical CO<sub>2</sub> analytical chromatography system utilizing Chiralpak (AD-H, AS-H or IC) or Chiralcel (OD-H, OJ-H, or OB-H) columns (4.6 mm x 25 cm) obtained from Daicel Chemical Industries, Ltd. High resolution mass spectra (HRMS) were obtained from Agilent 6200 Series TOF with an Agilent G1978A Multimode source in electrospray ionization (ESI+), atmospheric pressure chemical ionization (APCI+), or mixed ionization mode (MM: ESI-APCI+), or obtained from Caltech mass spectrometry laboratory.

A crystal was mounted on a polyimide MiTeGen loop with STP Oil Treatment and placed under a nitrogen stream. Low temperature (100K) X-ray data were collected with a Bruker AXS KAPPA APEX II diffractometer diffractometer running at 50 kV and 30 mA (Mo  $K_{\alpha}$  = 0.71073 Å; PHOTON 100 CMOS detector with TRIUMPH graphite monochromator). All diffractometer manipulations, including data collection, integration, and scaling were carried out using the Bruker APEX3 software. An absorption correction was applied using SADABS in point group 2. The space group was determined and the structure solved by intrinsic phasing using XT. Refinement was full-matrix least squares on  $F^2$  using XL. All non-hydrogen atoms were refined using anisotropic displacement parameters. Hydrogen atoms were placed in idealized positions and the coordinates refined (each of the two disordered pairs were constrained to the same position). The isotropic displacement parameters of all hydrogen atoms were fixed at 1.2 times (1.5 times for methyl groups and alcohol) the  $U_{eq}$  value of the bonded atom.

Reagents were purchased from Sigma-Aldrich, Acros Organics, Strem, or Alfa Aesar and used as received unless otherwise stated.

### List of Abbreviations:

ee – enantiomeric excess, SFC – supercritical fluid chromatography, TLC – thin-layer chromatography, IPA – isopropanol, LiHMDS – lithium bis(trimethylsilyl)amide, dba – dibenzylideneacetone, RBF – round-bottom flask, TFA – trifluoroacetic acid, TBAI – tetrabutylammonium iodide, Boc<sub>2</sub>O – di-*tert*-butyl dicarbonate, HPLC – high-performance liquid chromatography, DMAP – 4-dimethylaminopyridine, THF – tetrahydrofuran, BnBr – benzyl bromide, CDI – 1,1'-carbonyldiimidazole

### Syntheses of Hydroxymethyl 1,3-Disubstituted Isoquinolines

#### General sequence:

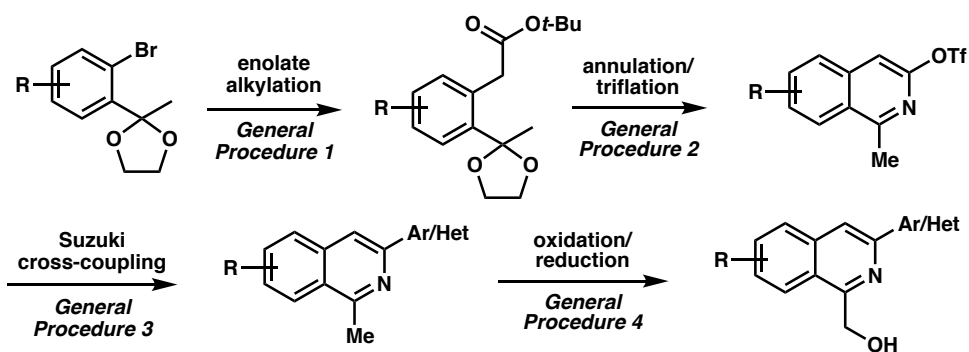

#### General procedure 1: Enolate alkylation of aryl bromide

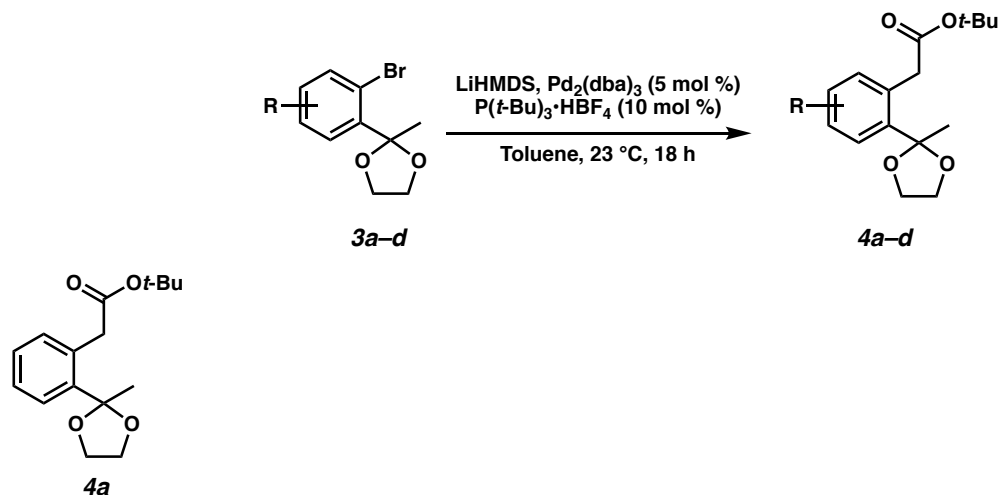

***tert*-butyl 2-(2-(2-methyl-1,3-dioxolan-2-yl)phenyl)acetate (4a):** This procedure has been adapted from a previous report.<sup>2</sup> In a Schlenk flask was added P(*t*-Bu)<sub>3</sub>·HBF<sub>4</sub> (119 mg, 0.41 mmol), Pd<sub>2</sub>(dba)<sub>3</sub> (188 mg, 0.21 mmol), a solution of 2-(2-bromophenyl)-2-methyl-1,3-dioxolane

**(3a)** (1.0 g, 4.1 mmol, 0.42 M), and *tert*-Butyl acetate (0.95 g, 8.2 mmol), respectively. The reaction mixture was cooled to  $-78\text{ }^{\circ}\text{C}$  and sparged with nitrogen for 15 minutes. A degassed solution of LiHMDS (1.72 g, 10.25 mmol, 1 M in toluene) was then added via syringe. The reaction mixture was degassed for an additional 15 minutes at  $-78\text{ }^{\circ}\text{C}$ , and allowed to slowly warm to room temperature. The reaction was stirred at room temperature for 18 hours, and then quenched with saturated aqueous  $\text{NaHCO}_3$ . The aqueous layer was extracted with  $\text{Et}_2\text{O}$  twice. The combined organic phases were dried over  $\text{MgSO}_4$ , filtered, and the solvent was removed in vacuo. The crude product was purified by silica gel flash chromatography (5% EtOAc in hexanes) to afford **4a** as a yellow oil (1.05 g, 92% yield):  $^1\text{H}$  NMR (400 MHz,  $\text{CDCl}_3$ )  $\delta$  7.53 – 7.45 (m, 1H), 7.20 – 7.06 (m, 3H), 3.96 – 3.83 (m, 2H), 3.71 (s, 2H), 3.68 – 3.55 (m, 2H), 1.60 (s, 3H), 1.39 (s, 9H);  $^{13}\text{C}$  NMR (100 MHz,  $\text{CDCl}_3$ )  $\delta$  171.6, 141.1, 132.6, 132.3, 128.2, 127.1, 126.4, 109.2, 80.4, 64.3, 40.4, 28.2, 28.2, 27.6; IR (Neat Film, NaCl) 3454, 3062, 2977, 2936, 2893, 1731, 1484, 1455, 1392, 1368, 1218, 1196, 1168, 1037, 952, 869, 763, 706  $\text{cm}^{-1}$ ; HRMS (MM:ESI-APCI+)  $m/z$  calc'd for  $\text{C}_{16}\text{H}_{23}\text{O}_4$   $[\text{M}+\text{H}]^+$ : 279.1591, found 279.1589.

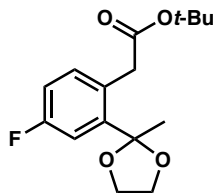**4b**

***tert*-butyl 2-(4-fluoro-2-(2-methyl-1,3-dioxolan-2-yl)phenyl)acetate (4b)**: Compound **4b** was prepared from aryl bromide (2-(2-bromo-5-fluorophenyl)-2-methyl-1,3-dioxolane) (**3b**) using general procedure 1, and purified by column chromatography (10% EtOAc in hexanes) to afford **4b** with impurities. The compound was then subjected to the second column chromatography (15%  $\text{Et}_2\text{O}$  in hexanes) to obtain **4b** as a colorless solid (74 mg, 61% yield);  $^1\text{H}$  NMR (400 MHz,  $\text{CDCl}_3$ )  $\delta$  7.28 (dd,  $J = 10.3, 2.8$  Hz, 1H), 7.15 (dd,  $J = 8.4, 5.7$  Hz, 1H), 6.94 (td,  $J = 8.2, 2.9$  Hz, 1H), 4.06 – 3.90 (m, 2H), 3.74 (s, 2H), 3.72 – 3.69 (m, 2H), 1.65 (s, 3H), 1.45 (s, 9H);  $^{13}\text{C}$  NMR (100 MHz,  $\text{CDCl}_3$ )  $\delta$  171.5, 161.9 (d,  $J = 245.1$  Hz), 143.9 (d,  $J = 6.2$  Hz), 134.2 (d,  $J = 7.8$  Hz), 127.9 (d,  $J = 3.3$  Hz), 114.9 (d,  $J = 21.1$  Hz), 113.5 (d,  $J = 23.0$  Hz), 108.6, 80.6, 64.4, 39.6, 28.2, 27.3;  $^{19}\text{F}$  NMR (282 MHz,  $\text{CDCl}_3$ )  $\delta$   $-115.6$  (ddd,  $J = 10.3, 8.0, 5.8$  Hz); IR (Neat Film, NaCl) 2980, 1732, 1613, 1493, 1412, 1392, 1368, 1340, 1256, 1200, 1179, 1147, 1037, 947, 878  $\text{cm}^{-1}$ ; HRMS (MM:ESI-APCI+)  $m/z$  calc'd for  $\text{C}_{16}\text{H}_{22}\text{FO}_4$   $[\text{M}+\text{H}]^+$ : 297.1497, found 297.1494.

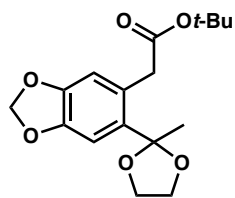**4c**

**tert-butyl 2-(6-(2-methyl-1,3-dioxolan-2-yl)benzo[d][1,3]dioxol-5-yl)acetate (4c):** Compound **4c** was prepared from aryl bromide (5-bromo-6-(2-methyl-1,3-dioxolan-2-yl)benzo[d][1,3]dioxole) (**3c**) using general procedure 1, and purified by column chromatography (5% to 15% EtOAc in hexanes) to afford **4c** as a pale yellow oil (83.4 mg, 63% yield):  $^1\text{H NMR}$  (400 MHz,  $\text{CDCl}_3$ )  $\delta$  7.07 (s, 1H), 6.66 (s, 1H), 5.93 (s, 2H), 3.95 – 3.93 (m, 2H), 3.72 – 3.69 (m, 2H), 3.62 (s, 2H), 1.64 (s, 3H), 1.46 (s, 9H);  $^{13}\text{C NMR}$  (100 MHz,  $\text{CDCl}_3$ )  $\delta$  171.7, 147.2, 146.7, 135.2, 125.9, 112.3, 109.1, 107.0, 101.3, 80.6, 64.3, 40.0, 28.3, 27.6; IR (Neat Film, NaCl) 2978, 2897, 1732, 1504, 1486, 1369, 1332, 1259, 1197, 1166, 1142, 1041, 929, 869, 935  $\text{cm}^{-1}$ ; HRMS (MM:ESI-APCI+)  $m/z$  calc'd for  $\text{C}_{17}\text{H}_{23}\text{O}_6$   $[\text{M}+\text{H}]^+$ : 323.1489, found 323.1501.

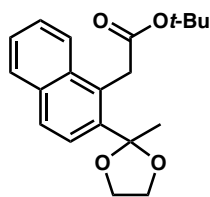**4d**

**tert-butyl 2-(2-(2-methyl-1,3-dioxolan-2-yl)naphthalen-1-yl)acetate (4d):** Compound **4d** was prepared from aryl bromide (2-(1-bromonaphthalen-2-yl)-2-methyl-1,3-dioxolane) (**3d**) using general procedure 1, and purified by column chromatography (0% to 5% EtOAc in hexanes) to afford **4d** as a pale yellow oil (2.15 g, 98% yield):  $^1\text{H NMR}$  (400 MHz,  $\text{CDCl}_3$ )  $\delta$  7.93 (d,  $J = 8.0$  Hz, 1H), 7.82 (d,  $J = 8.0$  Hz, 1H), 7.76 (s, 2H), 7.48 (ddd,  $J = 7.9, 6.7, 1.4$  Hz, 2H), 4.38 (s, 2H), 4.04 – 4.00 (m, 2H), 3.79 – 3.73 (m, 2H), 1.78 (s, 3H), 1.45 (s, 9H);  $^{13}\text{C NMR}$  (100 MHz,  $\text{CDCl}_3$ )  $\delta$  171.4, 139.3, 133.6, 128.7, 128.6, 127.8, 126.5, 125.8, 124.3, 124.1, 109.7, 80.7, 64.4, 36.2, 28.2, 27.8. IR (Neat Film, NaCl) 2980, 2890, 1732, 1454, 1368, 1336, 1142, 1100, 1037, 951, 884, 870, 822, 750  $\text{cm}^{-1}$ ; HRMS (MM:ESI-APCI+)  $m/z$  calc'd for  $\text{C}_{20}\text{H}_{25}\text{O}_4$   $[\text{M}+\text{H}]^+$ : 329.1747, found 329.1739.

### General procedure 2: Isoquinoline annulation and triflation

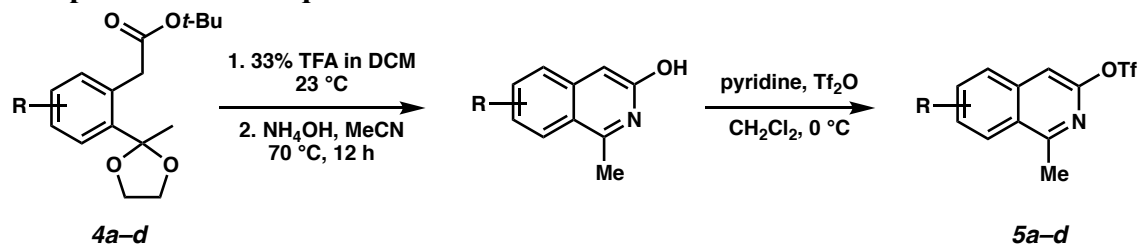

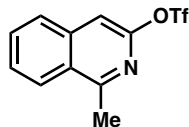**5a**

**1-methyloisoquinolin-3-yl trifluoromethanesulfonate (5a):** This procedure has been adapted from a previous report.<sup>3</sup> In a RBF were added ester **4a** (2.78 g, 10.0 mmol), anhydrous CH<sub>2</sub>Cl<sub>2</sub> (75 mL, 0.13 M), and TFA (25 mL, 33% volume of CH<sub>2</sub>Cl<sub>2</sub>), respectively. The reaction was stirred at room temperature for 2 hours, and then concentrated in vacuo. The crude was transferred to a Schlenk tube, dissolved in MeCN (10 mL, 1 M), and aqueous NH<sub>4</sub>OH (28–30%, 20 mL, 200% volume of MeCN). The tube was sealed with Kontes valve to prevent loss of gaseous ammonia and stirred at 70 °C. Within 1 hour, the yellow solid of the 3-hydroxyisoquinoline began to precipitate from the reaction solution. After stirring for 18 hours at 70 °C, the reaction was cooled to room temperature, then placed in a –20 °C freezer, and the yellow solid was collected via vacuum filtration. This yellow powder was then washed with cold MeCN and dried at high vacuum to provide 3-hydroxyisoquinoline intermediate (0.70 g, 4.39 mmol). If any starting material remains, the filtrate could be transferred to a flask and concentrated in vacuo to undergo a second condensation reaction.

To a separate flame-dried RBF containing CH<sub>2</sub>Cl<sub>2</sub> (22 mL, 0.2 M) and distilled pyridine (3.6 mL, 44 mmol), the collected yellow powder (0.70 g, 4.39 mmol) was added, and the resulting mixture was cooled to 0 °C. Trifluoromethanesulfonic anhydride (1.5 mL, 8.8 mmol) was then added dropwise at 0 °C, and the reaction was stirred at 0 °C for 1 hour. The reaction was then quenched with saturated aqueous NaHCO<sub>3</sub> at 0 °C, and then slowly warmed to room temperature. The reaction was extracted with CH<sub>2</sub>Cl<sub>2</sub>, dried over Na<sub>2</sub>SO<sub>4</sub>, and concentrated in vacuo. The crude product was purified by column chromatography (10% EtOAc in hexanes) to afford **5a** as a pale yellow oil (1.11 g, 38% yield over 3 steps): <sup>1</sup>H NMR (400 MHz, CDCl<sub>3</sub>) δ 8.17 (dd, *J* = 8.5, 1.0 Hz, 1H), 7.88 (dt, *J* = 8.3, 1.0 Hz, 1H), 7.76 (ddd, *J* = 8.2, 6.9, 1.2 Hz, 1H), 7.67 (ddd, *J* = 8.3, 6.9, 1.3 Hz, 1H), 7.42 (s, 1H), 2.97 (s, 3H); <sup>13</sup>C NMR (100 MHz, CDCl<sub>3</sub>) δ 160.3, 151.3, 138.6, 131.5, 128.1, 127.8, 127.6, 126.1, 118.9 (q, *J* = 320.5 Hz), 109.0, 22.1; <sup>19</sup>F NMR (282 MHz, CDCl<sub>3</sub>) δ –73.0 IR (Neat Film, NaCl) 1624, 1600, 1563, 1422, 1327, 1213, 1138, 1116, 987, 958, 891, 832, 742, 616 cm<sup>-1</sup>; HRMS (MM:ESI-APCI+) *m/z* calc'd for C<sub>11</sub>H<sub>9</sub>F<sub>3</sub>NO<sub>3</sub>S [M+H]<sup>+</sup>: 292.0250, found 292.0253.

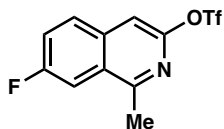**5b**

**7-fluoro-1-methyloisoquinolin-3-yl trifluoromethanesulfonate (5b):** Compound **5b** was prepared from ester **4b** using general procedure 2 and purified by column chromatography (10% EtOAc in hexanes) to provide a pale brown oil (384 mg, 31% yield over 3 steps): <sup>1</sup>H NMR (400

MHz, CDCl<sub>3</sub>)  $\delta$  7.90 (dd,  $J = 9.0, 5.3$  Hz, 1H), 7.76 (dd,  $J = 9.6, 2.5$  Hz, 1H), 7.56 (ddd,  $J = 8.9, 8.0, 2.5$  Hz, 1H), 7.43 (s, 1H), 2.92 (s, 3H); <sup>13</sup>C NMR (100 MHz, CDCl<sub>3</sub>)  $\delta$  161.4 (d,  $J = 251.1$  Hz), 159.4 (d,  $J = 6.1$  Hz), 151.1 (d,  $J = 3.3$  Hz), 135.5, 130.3 (d,  $J = 8.7$  Hz), 128.5 (d,  $J = 8.3$  Hz), 122.2 (d,  $J = 25.6$  Hz), 118.9 (q,  $J = 320.5$  Hz), 109.8 (d,  $J = 21.8$  Hz), 108.9, 22.1; <sup>19</sup>F NMR (282 MHz, CDCl<sub>3</sub>)  $\delta$  -73.0, -109.0 (ddd,  $J = 9.5, 8.0, 5.4$  Hz); IR (Neat Film, NaCl) 1598, 1573, 1516, 1416, 1209, 1136, 1114, 986, 960, 933, 875, 805, 764 cm<sup>-1</sup>; HRMS (MM:ESI-APCI+)  $m/z$  calc'd for C<sub>11</sub>H<sub>8</sub>F<sub>4</sub>NO<sub>3</sub>S [M+H]<sup>+</sup>: 310.0156, found 310.0149.

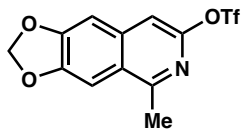**5c**

**5-methyl-[1,3]dioxolo[4,5-g]isoquinolin-7-yl trifluoromethanesulfonate (5c):** Compound **5c** was prepared from ester **4c** using general procedure 2 and purified by column chromatography (10 to 20% EtOAc in hexanes) to provide a white solid (608 mg, 58% yield over 3 steps): <sup>1</sup>H NMR (400 MHz, CDCl<sub>3</sub>)  $\delta$  7.35 (s, 1H), 7.23 (s, 1H), 7.10 (s, 1H), 6.15 (s, 2H), 2.82 (s, 3H); <sup>13</sup>C NMR (100 MHz, CDCl<sub>3</sub>)  $\delta$  156.9, 151.9, 150.9, 149.2, 137.3, 124.8, 118.8 (q,  $J = 321.2$  Hz), 108.4, 103.3, 102.2, 101.8, 22.2; <sup>19</sup>F NMR (282 MHz, CDCl<sub>3</sub>)  $\delta$  -73.0; IR (Neat Film, NaCl) 2918, 1584, 1504, 1464, 1416, 1223, 1134, 1038, 964, 940, 873, 840 cm<sup>-1</sup>; HRMS (MM:ESI-APCI+)  $m/z$  calc'd for C<sub>12</sub>H<sub>9</sub>F<sub>3</sub>NO<sub>5</sub>S [M+H]<sup>+</sup>: 336.0148, found 336.0146.

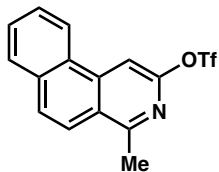**5d**

**4-methylbenzo[f]isoquinolin-2-yl trifluoromethanesulfonate (5d):** Compound **5d** was prepared from ester **4d** using general procedure 2 and purified by column chromatography (5 to 10% EtOAc in hexanes) to provide a white solid (497 mg, 65% yield over 3 steps): <sup>1</sup>H NMR (400 MHz, CDCl<sub>3</sub>)  $\delta$  8.63 – 8.57 (m, 1H), 8.15 (s, 1H), 8.01 – 7.95 (m, 2H), 7.90 (d,  $J = 9.2$  Hz, 1H), 7.81 – 7.73 (m, 2H), 3.01 (s, 3H); <sup>13</sup>C NMR (100 MHz, CDCl<sub>3</sub>)  $\delta$  158.8, 152.5, 138.6, 133.3, 129.6, 129.1, 128.9, 128.6, 127.8, 125.8, 123.6, 122.2, 118.8 (q,  $J = 321.2$  Hz), 105.1, 22.4; <sup>19</sup>F NMR (282 MHz, CDCl<sub>3</sub>)  $\delta$  -78.3; IR (Neat Film, NaCl) 1588, 1416, 1377, 1207, 1180, 1138, 972, 878, 846, 817, 754 cm<sup>-1</sup>; HRMS (MM:ESI-APCI+)  $m/z$  calc'd for C<sub>15</sub>H<sub>11</sub>F<sub>3</sub>NO<sub>3</sub>S [M+H]<sup>+</sup>: 342.0406, found 342.0399.

## General procedure 3: Suzuki cross-coupling

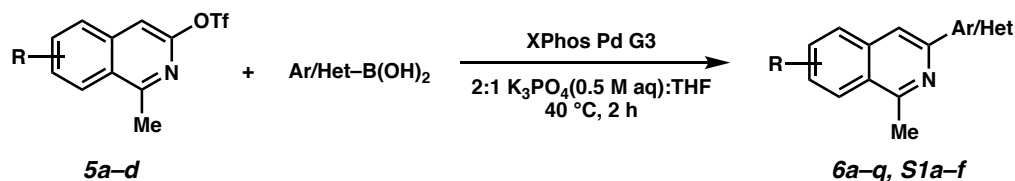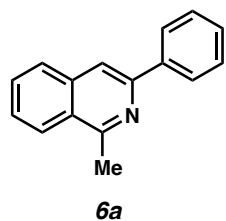

**1-methyl-3-phenylisoquinoline (6a):** This procedure has been adapted from a previous report.<sup>4</sup> To a flame-dried 20-mL scintillation vial capped with a PTFE-lined septum was added XPhos Pd G3 (11.63 mg, 0.014 mmol) and phenyl boronic acid (126 mg, 1.03 mmol). The reaction vial was then evacuated and backfilled with N<sub>2</sub> three times. The isoquinoline triflate **5a** (200 mg, 0.687 mmol) in degassed THF (2 mL, 0.3 M) was then added to the vial, followed by degassed 0.5 M K<sub>3</sub>PO<sub>4</sub> solution (4 mL, 0.2 M). The reaction was then stirred at 40 °C for 2 hours. Afterwards, the reaction was diluted with water and the aqueous layer was extracted with Et<sub>2</sub>O. The combined organic phases were dried over Na<sub>2</sub>SO<sub>4</sub>, concentrated in vacuo, and purified by column chromatography (5% EtOAc in hexanes) to afford **6a** as a white solid (138 mg, 92% yield): <sup>1</sup>H NMR (400 MHz, CDCl<sub>3</sub>) δ 8.15 – 8.13 (m, 3H), 7.93 (s, 1H), 7.86 (dt, *J* = 8.3, 1.0 Hz, 1H), 7.67 (ddd, *J* = 8.2, 6.9, 1.2 Hz, 1H), 7.57 (ddd, *J* = 8.2, 6.8, 1.3 Hz, 1H), 7.52 – 7.48 (m, 2H), 7.42 – 7.38 (m, 1H), 3.05 (s, 3H); <sup>13</sup>C NMR (100 MHz, CDCl<sub>3</sub>) δ 158.7, 150.2, 140.0, 136.9, 130.2, 128.9, 128.4, 127.8, 127.1, 126.9, 126.7, 125.8, 115.4, 22.9; IR (Neat Film, NaCl) 3060, 1621, 1589, 1571, 1501, 1440, 1390, 1332, 1030, 902, 880, 786, 765, 692 cm<sup>-1</sup>; HRMS (MM:ESI-APCI+) *m/z* calc'd for C<sub>16</sub>H<sub>14</sub>N [M+H]<sup>+</sup>: 220.1121, found 220.1129.

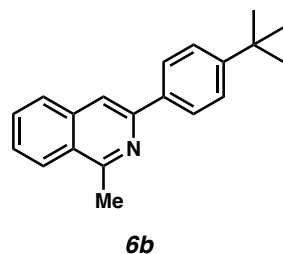

**3-(4-(tert-butyl)phenyl)-1-methylisoquinoline (6b):** Compound **6b** was prepared from triflate **5a** using general procedure 3 and purified by column chromatography (5% EtOAc in hexanes) to provide a pale yellow oil (177 mg, 93% yield); <sup>1</sup>H NMR (400 MHz, CDCl<sub>3</sub>) δ 8.12 (d, *J* = 8.4 Hz, 1H) 8.06 (d, *J* = 8.5 Hz, 2H), 7.90 (s, 1H), 7.85 (d, *J* = 8.2 Hz, 1H), 7.66 (ddd, *J* = 8.1, 6.8, 1.2 Hz, 1H), 7.57 – 7.52 (m, 3H), 3.04 (s, 3H), 1.38 (s, 9H); <sup>13</sup>C NMR (100 MHz, CDCl<sub>3</sub>) δ 158.6, 151.5, 150.3, 137.3, 136.9, 130.1, 127.7, 126.8, 126.7, 126.6, 125.8, 125.8, 115.0, 34.8,



31.5, 22.8; IR (Neat Film, NaCl) 2961, 1622, 1591, 1568, 1515, 1442, 1390, 1362, 1333, 1268, 1112, 1017, 837, 754, 743, 685  $\text{cm}^{-1}$ ; HRMS (MM:ESI-APCI+)  $m/z$  calc'd for  $\text{C}_{20}\text{H}_{22}\text{N}$   $[\text{M}+\text{H}]^+$ : 276.1747, found 276.1749.

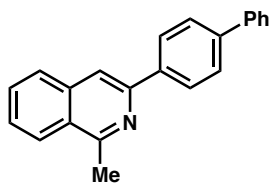**6c**

**3-([1,1'-biphenyl]-4-yl)-1-methylisoquinoline (6c):** Compound **6c** was prepared from triflate **5a** using general procedure 3 and purified by column chromatography (5% EtOAc in hexanes) to provide a colorless solid (191 mg, 94% yield);  $^1\text{H}$  NMR (400 MHz,  $\text{CDCl}_3$ )  $\delta$  8.24 – 8.22 (m, 2H), 8.14 (d,  $J = 8.4$  Hz, 1H), 7.98 (s, 1H), 7.88 (d,  $J = 8.1$  Hz, 1H), 7.75 – 7.73 (m, 2H), 7.70 – 7.67 (m, 3H), 7.58 (ddd,  $J = 8.3, 6.9, 1.3$  Hz, 1H), 7.50 – 7.46 (m, 2H), 7.39 – 7.37 (m, 1H), 3.06 (s, 3H);  $^{13}\text{C}$  NMR (100 MHz,  $\text{CDCl}_3$ )  $\delta$  158.8, 149.7, 141.2, 141.0, 138.9, 136.9, 130.2, 128.9, 127.8, 127.6, 127.5, 127.5, 127.2, 126.9, 126.8, 125.8, 115.2, 22.9; IR (Neat Film, NaCl) 3028, 1621, 1568, 1488, 1440, 1389, 1334, 842, 766, 730, 696  $\text{cm}^{-1}$ ; HRMS (MM:ESI-APCI+)  $m/z$  calc'd for  $\text{C}_{22}\text{H}_{18}\text{N}$   $[\text{M}+\text{H}]^+$ : 296.1434, found 296.1426.

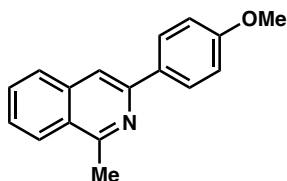**6d**

**3-(4-methoxyphenyl)-1-methylisoquinoline (6d):** Compound **6d** was prepared from triflate **5a** using general procedure 3 and purified by column chromatography (5% EtOAc in hexanes) to afford a white solid (79 mg, 93% yield);  $^1\text{H}$  NMR (400 MHz,  $\text{CDCl}_3$ )  $\delta$  8.14 – 8.07 (m, 3H), 7.84 (s, 1H), 7.81 (d,  $J = 8.5$ , 1H), 7.64 (ddd,  $J = 8.2, 6.8, 1.2$  Hz, 1H), 7.53 (ddd,  $J = 8.2, 6.8, 1.3$  Hz, 1H), 7.06 – 7.01 (m, 2H), 3.88 (s, 3H), 3.03 (s, 3H);  $^{13}\text{C}$  NMR (100 MHz,  $\text{CDCl}_3$ )  $\delta$  160.0, 158.4, 149.8, 136.9, 132.6, 130.0, 128.2, 127.5, 126.4, 126.3, 125.7, 114.1, 114.1, 55.4, 22.7; IR (Neat Film, NaCl) 3060, 2955, 2835, 1608, 1568, 1514, 1439, 1390, 1290, 1249, 1174, 1034, 833, 751, 730  $\text{cm}^{-1}$ ; HRMS (MM:ESI-APCI+)  $m/z$  calc'd for  $\text{C}_{17}\text{H}_{16}\text{NO}$   $[\text{M}+\text{H}]^+$ : 250.1226, found 250.1220.

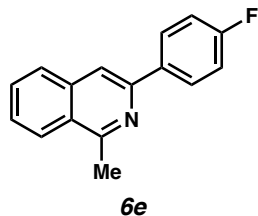

**3-(4-fluorophenyl)-1-methylisoquinoline (6e):** Compound **6e** was prepared from triflate **5a** using general procedure 3 and purified by column chromatography (10% EtOAc in hexanes) to provide a white solid (155 mg, 95% yield);  $^1\text{H}$  NMR (400 MHz,  $\text{CDCl}_3$ )  $\delta$  8.17 – 8.07 (m, 3H), 7.89 – 7.81 (m, 2H), 7.68 (ddd,  $J = 8.2, 6.9, 1.2$  Hz, 1H), 7.58 (ddd,  $J = 8.2, 6.8, 1.3$  Hz, 1H), 7.20 – 7.16 (m, 2H), 3.04 (s, 3H);  $^{13}\text{C}$  NMR (100 MHz,  $\text{CDCl}_3$ )  $\delta$  163.3 (d,  $J = 247.3$  Hz), 158.8, 149.1, 136.9, 136.0 (d,  $J = 3.3$  Hz), 130.3, 128.8 (d,  $J = 8.2$  Hz), 127.7, 127.0, 126.6, 125.8, 115.7 (d,  $J = 21.4$  Hz), 115.1, 22.8;  $^{19}\text{F}$  NMR (282 MHz,  $\text{CDCl}_3$ )  $\delta$  -114.2; IR (Neat Film, NaCl) 1605, 1570, 1510, 1440, 1390, 1332, 1231, 1156, 836, 749, 723  $\text{cm}^{-1}$ ; HRMS (MM:ESI-APCI+)  $m/z$  calc'd for  $\text{C}_{16}\text{H}_{13}\text{FN}$   $[\text{M}+\text{H}]^+$ : 238.1027, found 238.1030.

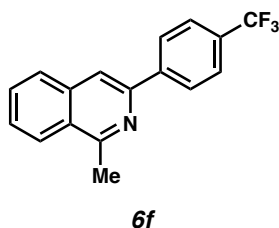

**1-methyl-3-(4-(trifluoromethyl)phenyl)isoquinoline (6f):** Compound **6f** was prepared from triflate **5a** using general procedure 3 and purified by column chromatography (2% to 3% EtOAc in hexanes) to afford a white solid (89 mg, 91% yield):  $^1\text{H}$  NMR (400 MHz,  $\text{CDCl}_3$ )  $\delta$  8.26 (d,  $J = 8.1$  Hz, 2H), 8.15 (d,  $J = 8.4$ , 1H), 7.96 (s, 1H), 7.88 (d,  $J = 8.2$  Hz, 1H), 7.78 – 7.73 (m, 2H), 7.73 – 7.67 (m, 1H), 7.63 – 7.59 (m, 1H), 3.05 (s, 3H);  $^{13}\text{C}$  NMR (100 MHz,  $\text{CDCl}_3$ )  $\delta$  159.1, 148.5, 143.3, 136.7, 130.4, 130.2 (q,  $J = 32.5$  Hz), 127.9, 127.5, 127.3, 127.1, 125.8, 125.7 (q,  $J = 3.8$  Hz), 124.4 (q,  $J = 271.9$  Hz), 116.1, 22.8;  $^{19}\text{F}$  NMR (282 MHz,  $\text{CDCl}_3$ )  $\delta$  -62.4; IR (Neat Film, NaCl) 3070, 2357, 1622, 1573, 1418, 1390, 1324, 1162, 1122, 1066, 1015, 842, 754, 742, 682  $\text{cm}^{-1}$ ; HRMS (MM:ESI-APCI+)  $m/z$  calc'd for  $\text{C}_{17}\text{H}_{13}\text{F}_3\text{N}$   $[\text{M}+\text{H}]^+$ : 288.0995, found 288.0988.

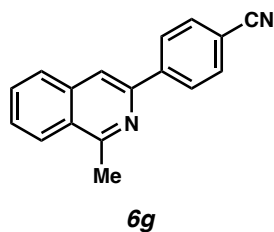

**4-(1-methylisoquinolin-3-yl)benzonitrile (6g):** Compound **6g** was prepared from triflate **5a** using general procedure 3 and purified by column chromatography (10% to 20% EtOAc in hexanes) to provide a white solid (144 mg, 86% yield);  $^1\text{H}$  NMR (400 MHz,  $\text{CDCl}_3$ )  $\delta$  8.38 –

8.22 (m, 2H), 8.16 (d,  $J = 8.3$  Hz, 1H), 7.99 (s, 1H), 7.89 (d,  $J = 8.3$ , 1H), 7.82 – 7.75 (m, 2H), 7.73 (ddd,  $J = 8.1, 6.9, 1.2$  Hz, 1H), 7.64 (ddd,  $J = 8.2, 6.9, 1.3$  Hz, 1H), 3.05 (s, 3H);  $^{13}\text{C}$  NMR (100 MHz,  $\text{CDCl}_3$ )  $\delta$  159.3, 147.6, 144.0, 136.6, 132.7, 130.7, 128.0, 127.9, 127.6, 127.3, 125.9, 119.3, 116.6, 111.8, 22.8; IR (Neat Film, NaCl) 2224, 1618, 1570, 1508, 1441, 1390, 1334, 878, 844, 748, 731  $\text{cm}^{-1}$ ; HRMS (MM:ESI-APCI+)  $m/z$  calc'd for  $\text{C}_{17}\text{H}_{13}\text{N}_2$   $[\text{M}+\text{H}]^+$ : 245.1073, found 245.1070.

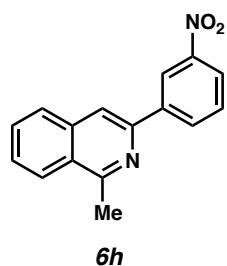

**1-methyl-3-(3-nitrophenyl)isoquinoline (6h):** Compound **6h** was prepared from triflate **5a** using general procedure 3 and purified by column chromatography (10% EtOAc in hexanes) to provide a white solid (139 mg, 77% yield);  $^1\text{H}$  NMR (400 MHz,  $\text{CDCl}_3$ )  $\delta$  9.01 (t,  $J = 2.0$  Hz, 1H), 8.51 (ddd,  $J = 7.8, 1.8, 1.1$  Hz, 1H), 8.24 (ddd,  $J = 8.2, 2.3, 1.1$  Hz, 1H), 8.16 (dd,  $J = 8.3, 1.0$  Hz, 1H), 8.01 (s, 1H), 7.90 (dd,  $J = 8.1, 0.7$  Hz, 1H), 7.72 (ddd,  $J = 8.1, 6.9, 1.2$  Hz, 1H), 7.72 – 7.59 (m, 2H), 3.05 (s, 3H);  $^{13}\text{C}$  NMR (100 MHz,  $\text{CDCl}_3$ )  $\delta$  159.3, 149.0, 147.3, 141.7, 136.6, 132.8, 130.6, 129.7, 127.9, 127.8, 127.2, 125.9, 123.0, 121.9, 116.0, 22.8; IR (Neat Film, NaCl) 1619, 1568, 1524, 1442, 1390, 1350, 880, 806, 749, 692  $\text{cm}^{-1}$ ; HRMS (MM:ESI-APCI+)  $m/z$  calc'd for  $\text{C}_{16}\text{H}_{13}\text{N}_2\text{O}_2$   $[\text{M}+\text{H}]^+$ : 265.0972, found 265.0974.

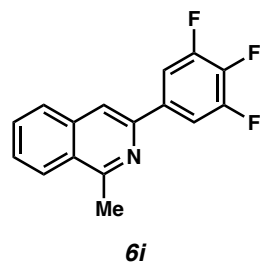

**1-methyl-3-(3,4,5-trifluorophenyl)isoquinoline (6i):** Compound **6i** was prepared from triflate **5a** using general procedure 3 and purified by column chromatography (5% EtOAc in hexanes) to afford a white solid (103 mg, 87% yield);  $^1\text{H}$  NMR (400 MHz,  $\text{CDCl}_3$ )  $\delta$  8.13 (d,  $J = 8.4$ , 1H), 7.86 – 7.78 (m, 4H), 7.72 – 7.68 (m, 1H), 7.65 – 7.58 (m, 1H), 3.02 (s, 3H);  $^{13}\text{C}$  NMR (100 MHz,  $\text{CDCl}_3$ )  $\delta$  159.1, 151.6 (ddd,  $J = 248.4, 10.1, 4.1$  Hz), 146.5, 140.0 (dt,  $J = 252.6, 15.7$  Hz), 136.6, 136.0 (td,  $J = 7.5, 4.5$  Hz), 130.6, 127.8, 127.7, 127.1, 125.8, 115.4, 110.9 – 110.7 (m), 22.7;  $^{19}\text{F}$  NMR (282 MHz,  $\text{CDCl}_3$ )  $\delta$  -134.4 (dd,  $J = 20.5, 9.2$  Hz), -161.1 – -161.3 (m); IR (Neat Film, NaCl) 1619, 1570, 1526, 1446, 1392, 1352, 1237, 1034, 879, 847, 753  $\text{cm}^{-1}$ ; HRMS (MM:ESI-APCI+)  $m/z$  calc'd for  $\text{C}_{16}\text{H}_{11}\text{F}_3\text{N}$   $[\text{M}+\text{H}]^+$ : 274.0838, found 274.0841.

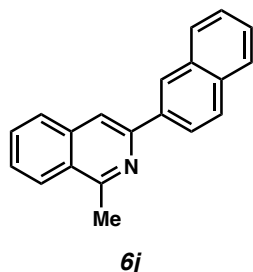

**1-methyl-3-(naphthalen-2-yl)isoquinoline (6j):** Compound **6j** was prepared from triflate **5a** using general procedure 3 and purified by column chromatography (5% EtOAc in hexanes) to provide a white solid (159 mg, 86% yield);  $^1\text{H}$  NMR (400 MHz,  $\text{CDCl}_3$ )  $\delta$  8.68 (s, 1H), 8.27 (dd,  $J = 8.6, 1.8$  Hz, 1H), 8.16 (dq,  $J = 8.3, 1.0$  Hz, 1H), 8.07 (s, 1H), 8.00 – 7.96 (m, 2H), 7.91 – 7.86 (m, 2H), 7.70 (ddd,  $J = 8.2, 6.8, 1.2$  Hz, 1H), 7.59 (ddd,  $J = 8.2, 6.8, 1.3$  Hz, 1H), 7.56 – 7.46 (m, 2H), 3.09 (s, 3H);  $^{13}\text{C}$  NMR (100 MHz,  $\text{CDCl}_3$ )  $\delta$  158.9, 149.9, 137.2, 137.0, 133.9, 133.5, 130.2, 128.9, 128.5, 127.8, 127.8, 127.0, 126.8, 126.3, 126.3, 125.8, 124.9, 115.7, 22.9; IR (Neat Film, NaCl) 3059, 1621, 1585, 1567, 1508, 1439, 1390, 879, 848, 816, 744  $\text{cm}^{-1}$ ; HRMS (MM:ESI-APCI+)  $m/z$  calc'd for  $\text{C}_{20}\text{H}_{16}\text{N}$   $[\text{M}+\text{H}]^+$ : 270.1277, found 270.1270.

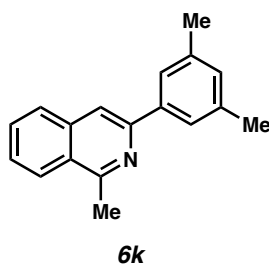

**3-(3,5-dimethylphenyl)-1-methylisoquinoline (6k):** Compound **6k** was prepared from triflate **5a** using general procedure 3 and purified by column chromatography to provide a white solid (156 mg, 92% yield);  $^1\text{H}$  NMR (400 MHz,  $\text{CDCl}_3$ )  $\delta$  8.13 (dd,  $J = 8.4, 1.1$  Hz, 1H), 7.90 (s, 1H), 7.85 (dd,  $J = 8.2, 0.7$  Hz, 1H), 7.75 (s, 2H), 7.66 (ddd,  $J = 8.2, 6.8, 1.2$  Hz, 1H), 7.56 (ddd,  $J = 8.2, 6.9, 1.3$  Hz, 1H), 7.05 (s, 1H), 3.05 (s, 3H), 2.43 (s, 6H);  $^{13}\text{C}$  NMR (100 MHz,  $\text{CDCl}_3$ )  $\delta$  158.6, 150.5, 139.9, 138.3, 136.9, 130.2, 130.1, 127.7, 126.8, 126.7, 125.8, 125.0, 115.4, 22.8, 21.7; IR (Neat Film, NaCl) 2919, 2358, 1622, 1582, 1568, 1443, 1391, 1335, 874, 846, 786, 750, 711  $\text{cm}^{-1}$ ; HRMS (MM:ESI-APCI+)  $m/z$  calc'd for  $\text{C}_{18}\text{H}_{18}\text{N}$   $[\text{M}+\text{H}]^+$ : 248.1434, found 248.1434.

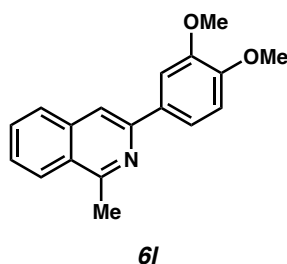

**3-(3,4-dimethoxyphenyl)-1-methylisoquinoline (6l):** Compound **6l** was prepared from triflate **5a** using general procedure 3 and purified by column chromatography (20% EtOAc in hexanes)

to provide a white solid (195 mg, 99% yield);  $^1\text{H}$  NMR (400 MHz,  $\text{CDCl}_3$ )  $\delta$  8.11 (d,  $J = 8.4$ , 1H), 7.89 – 7.81 (m, 2H), 7.77 (d,  $J = 2.1$  Hz, 1H), 7.71 – 7.61 (m, 2H), 7.55 (ddd,  $J = 8.3$ , 6.9, 1.3 Hz, 1H), 6.99 (d,  $J = 8.4$  Hz, 1H), 4.04 (s, 3H), 3.95 (s, 3H), 3.04 (s, 3H);  $^{13}\text{C}$  NMR (100 MHz,  $\text{CDCl}_3$ )  $\delta$  158.6, 149.8, 149.6, 149.3, 137.0, 132.9, 130.2, 127.6, 126.7, 126.5, 125.8, 119.5, 114.5, 111.4, 110.3, 56.1, 22.8; IR (Neat Film, NaCl) 2936, 2833, 1568, 1516, 1454, 1436, 1317, 1259, 1236, 1170, 1026, 874, 817, 751  $\text{cm}^{-1}$ ; HRMS (MM:ESI-APCI+)  $m/z$  calc'd for  $\text{C}_{18}\text{H}_{18}\text{NO}_2$   $[\text{M}+\text{H}]^+$ : 280.1332, found 280.1337.

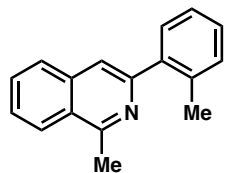**6m**

**1-methyl-3-(*o*-tolyl)isoquinoline (6m):** Compound **6m** was prepared from triflate **5a** using general procedure 3 and purified by column chromatography (10% EtOAc in hexanes) to provide a white solid (153 mg, 96% yield);  $^1\text{H}$  NMR (400 MHz,  $\text{CDCl}_3$ )  $\delta$  8.17 (d,  $J = 8.4$ , 1H), 7.84 (d,  $J = 8.3$ , 1H), 7.70 (ddd,  $J = 8.2$ , 6.8, 1.3 Hz, 1H), 7.65 – 7.57 (m, 2H), 7.53 – 7.45 (m, 1H), 7.32 – 7.30 (m, 3H), 3.04 (s, 3H), 2.43 (s, 3H);  $^{13}\text{C}$  NMR (100 MHz,  $\text{CDCl}_3$ )  $\delta$  158.1, 152.7, 140.9, 136.5, 136.3, 130.9, 130.1, 130.1, 128.1, 127.5, 127.0, 126.2, 126.0, 125.7, 118.9, 22.6, 20.6; IR (Neat Film, NaCl) 3053, 2950, 2920, 2355, 1622, 1584, 1567, 1498, 1446, 1392, 1360, 1330, 1144, 1033, 969, 906, 884, 763, 752, 726  $\text{cm}^{-1}$ ; HRMS (MM:ESI-APCI+)  $m/z$  calc'd for  $\text{C}_{17}\text{H}_{16}\text{N}$   $[\text{M}+\text{H}]^+$ : 234.1277, found 234.1286.

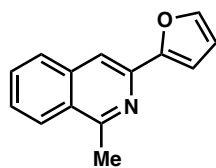**6n**

**3-(furan-2-yl)-1-methylisoquinoline (6n):** Compound **6n** was prepared from triflate **5a** using general procedure 3 and purified by column chromatography (5% EtOAc in hexanes) to provide a white solid (106 mg, 99% yield);  $^1\text{H}$  NMR (400 MHz,  $\text{CDCl}_3$ )  $\delta$  8.06 (d,  $J = 8.4$  Hz, 1H), 7.86 (s, 1H), 7.80 (dd,  $J = 8.4$  Hz, 1H), 7.67 – 7.59 (m, 1H), 7.57 – 7.49 (m, 2H), 7.13 (dd,  $J = 3.4$ , 0.8 Hz, 1H), 6.56 (dd,  $J = 3.4$ , 1.8 Hz, 1H), 2.99 (s, 3H);  $^{13}\text{C}$  NMR (100 MHz,  $\text{CDCl}_3$ )  $\delta$  159.0, 154.4, 142.9, 142.3, 136.5, 130.2, 127.6, 126.7, 126.6, 125.8, 113.0, 112.0, 108.1, 22.6; IR (Neat Film, NaCl) 3067, 1622, 1568, 1488, 1447, 1390, 1325, 1288, 1216, 1157, 1007, 970, 883, 814, 736  $\text{cm}^{-1}$ ; HRMS (MM:ESI-APCI+)  $m/z$  calc'd for  $\text{C}_{14}\text{H}_{12}\text{NO}$   $[\text{M}+\text{H}]^+$ : 210.0913, found 210.0910.

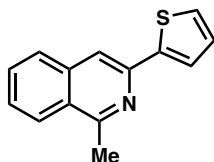**6o**

**1-methyl-3-(thiophen-2-yl)isoquinoline (6o):** Compound **6o** was prepared from triflate **5a** using general procedure 3 and purified by column chromatography (3% EtOAc in hexanes) to provide a white solid (103 mg, 92% yield):  $^1\text{H}$  NMR (400 MHz,  $\text{CDCl}_3$ )  $\delta$  8.07 (dt,  $J = 8.4$  Hz, 1H), 7.82 (s, 1H), 7.79 (dd,  $J = 8.2$  Hz, 1H), 7.69 (dd,  $J = 3.6, 1.1$  Hz, 1H), 7.64 (ddd,  $J = 8.1, 6.8, 1.2$  Hz, 1H), 7.52 (ddd,  $J = 8.2, 6.8, 1.2$  Hz, 1H), 7.38 (dd,  $J = 5.1, 1.1$  Hz, 1H), 7.14 (dd,  $J = 5.0, 3.6$  Hz, 1H), 2.99 (s, 3H);  $^{13}\text{C}$  NMR (100 MHz,  $\text{CDCl}_3$ )  $\delta$  158.8, 145.5, 145.4, 136.6, 130.2, 128.1, 127.4, 126.7, 126.6, 125.8, 123.8, 113.1, 22.5; IR (Neat Film, NaCl) 3068, 1620, 1586, 1568, 1446, 1387, 1330, 1238, 1194, 1036, 876, 820, 748, 704  $\text{cm}^{-1}$ ; HRMS (MM:ESI-APCI+)  $m/z$  calc'd for  $\text{C}_{14}\text{H}_{12}\text{NS}$   $[\text{M}+\text{H}]^+$ : 226.0685, found 226.0680.

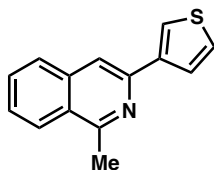**6p**

**1-methyl-3-(thiophen-3-yl)isoquinoline (6p):** Compound **6p** was prepared from triflate **5a** using general procedure 3 and purified by column chromatography (5% EtOAc in hexanes) to provide a white solid (148 mg, 95% yield):  $^1\text{H}$  NMR (400 MHz,  $\text{CDCl}_3$ )  $\delta$  8.10 (dd,  $J = 8.4, 1.0$  Hz, 1H), 8.04 (dd,  $J = 3.1, 1.3$  Hz, 1H), 7.81 (dt,  $J = 8.2, 0.9$  Hz, 1H), 7.79 (s, 1H), 7.73 (dd,  $J = 5.0, 1.3$  Hz, 1H), 7.65 (ddd,  $J = 8.2, 6.8, 1.2$  Hz, 1H), 7.54 (ddd,  $J = 8.3, 6.9, 1.3$  Hz, 1H), 7.42 (dd,  $J = 5.0, 3.1$  Hz, 1H), 3.01 (s, 3H);  $^{13}\text{C}$  NMR (100 MHz,  $\text{CDCl}_3$ )  $\delta$  158.8, 146.4, 142.7, 136.9, 130.2, 127.6, 126.7, 126.6, 126.3, 126.2, 125.8, 123.2, 114.7, 22.8; IR (Neat Film, NaCl) 3056, 2920, 1622, 1591, 1568, 1496, 1446, 1388, 1317, 874, 842, 795, 749, 696  $\text{cm}^{-1}$ ; HRMS (MM:ESI-APCI+)  $m/z$  calc'd for  $\text{C}_{14}\text{H}_{12}\text{NS}$   $[\text{M}+\text{H}]^+$ : 226.0685, found 226.0687.

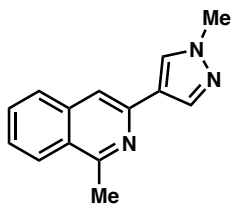**6q**

**1-methyl-3-(1-methyl-1H-pyrazol-4-yl)isoquinoline (6q):** Compound **6q** was prepared from triflate **5a** using general procedure 3 and purified by column chromatography (50% to 60% EtOAc in hexanes) to provide a white solid (112 mg, 99% yield):  $^1\text{H}$  NMR (400 MHz,  $\text{CDCl}_3$ )  $\delta$  8.07 (d,  $J = 8.4$  Hz, 1H), 8.04 – 8.00 (m, 2H), 7.77 (dd,  $J = 8.2, 1.1$  Hz, 1H), 7.67 – 7.60 (m, 2H),

7.54 – 7.47 (m, 1H), 3.98 (s, 3H), 2.97 (s, 3H);  $^{13}\text{C}$  NMR (100 MHz,  $\text{CDCl}_3$ )  $\delta$  158.8, 137.4, 136.8, 130.1, 128.9, 127.1, 126.2, 126.1, 125.7, 113.3, 39.1, 22.6; IR (Neat Film, NaCl) 2940, 2351, 1620, 1601, 1568, 1556, 1493, 1416, 1182, 983, 840, 750, 702  $\text{cm}^{-1}$ ; HRMS (MM:ESI-APCI+)  $m/z$  calc'd for  $\text{C}_{14}\text{H}_{14}\text{N}_3$   $[\text{M}+\text{H}]^+$ : 224.1182, found 224.1176.

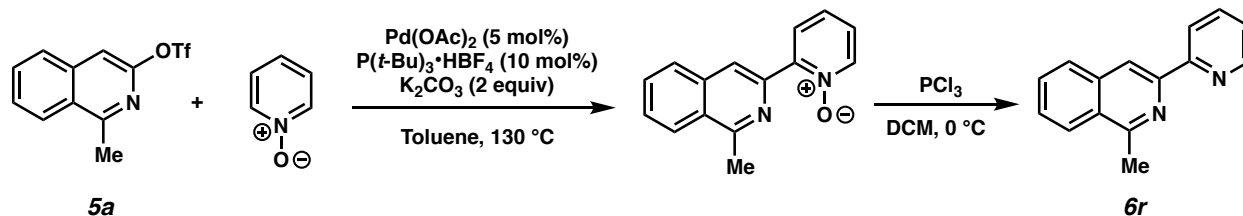

**1-methyl-3-(pyridin-2-yl)isoquinoline (6r):** Compound **6r** was prepared from triflate **5a** using a procedure adapted from a previous report.<sup>5</sup> To a microwave vial was added flame-dried  $\text{K}_2\text{CO}_3$  (142 mg, 1.03 mmol),  $\text{Pd}(\text{OAc})_2$  (5.8 mg, 0.026 mmol),  $\text{P}(t\text{-Bu})_3\cdot\text{HBF}_4$  (15 mg, 0.052 mmol), and the *N*-oxide (147 mg, 1.55 mmol). The vial was then evacuated and backfilled with argon three times. A solution of **5a** (150 mg, 0.52 mmol) in toluene (2 mL, 0.3 M) was then added, and the reaction was stirred at 130 °C overnight. The reaction was then cooled to room temperature, filtered through celite, and dissolved in  $\text{CH}_2\text{Cl}_2$  (10 mL, 0.05 M). The reaction flask was then cooled to 0 °C and  $\text{PCl}_3$  (0.27 mL, 3.1 mmol) was added dropwise, then the reaction stirred for 30 minutes at 0 °C. The reaction was then quenched with saturated aqueous  $\text{K}_2\text{CO}_3$ , extracted with EtOAc, and dried over  $\text{Na}_2\text{SO}_4$ . The crude product was purified by column chromatography (30% EtOAc in hexanes + 1%  $\text{NEt}_3$ ) to provide a pale yellow solid (56 mg, 50% yield over 2 steps);  $^1\text{H}$  NMR (400 MHz,  $\text{CDCl}_3$ )  $\delta$  8.72 (dd,  $J = 4.8, 1.9$  Hz, 1H), 8.62 (s, 1H), 8.56 (dd,  $J = 8.0, 1.1$  Hz, 1H), 8.14 (dd,  $J = 8.3, 1.0$  Hz, 1H), 7.95 (dt,  $J = 8.2, 1.0$  Hz, 1H), 7.84 (td,  $J = 7.7, 1.8$  Hz, 1H), 7.68 (ddd,  $J = 8.1, 6.8, 1.2$  Hz, 1H), 7.60 (ddd,  $J = 8.2, 6.9, 1.4$  Hz, 1H), 7.29 (ddd,  $J = 7.5, 4.8, 1.2$  Hz, 1H), 3.05 (s, 3H);  $^{13}\text{C}$  NMR (100 MHz,  $\text{CDCl}_3$ )  $\delta$  158.5, 156.9, 149.4, 148.7, 137.1, 136.9, 130.2, 128.6, 127.7, 127.5, 125.8, 123.3, 121.4, 116.5, 22.9; IR (Neat Film, NaCl) 3053, 3004, 2916, 1621, 1580, 1568, 1474, 1443, 1426, 1391, 1335, 1142, 891, 796, 742, 681, 624  $\text{cm}^{-1}$ ; HRMS (MM:ESI-APCI+)  $m/z$  calc'd for  $\text{C}_{15}\text{H}_{13}\text{N}_2$   $[\text{M}+\text{H}]^+$ : 221.1073, found 221.1076.

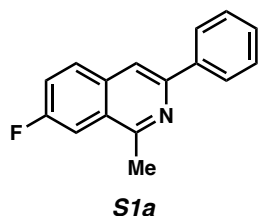

**7-fluoro-1-methyl-3-phenylisoquinoline (S1a):** Compound **S1a** was prepared from triflate **5b** using general procedure 3 and purified by column chromatography (5% EtOAc in hexanes) to provide a white solid (110 mg, 93% yield):  $^1\text{H}$  NMR (400 MHz,  $\text{CDCl}_3$ )  $\delta$  8.14 – 8.11 (m, 2H), 7.90 (s, 1H), 7.85 (dd,  $J = 9.2, 5.7$  Hz, 1H), 7.73 – 7.68 (m, 1H), 7.54 – 7.48 (m, 2H), 7.48 – 7.38 (m, 2H), 2.99 (s, 3H);  $^{13}\text{C}$  NMR (100 MHz,  $\text{CDCl}_3$ )  $\delta$  160.7 (d,  $J = 248.3$  Hz), 158.0 (d,  $J = 5.8$

Hz), 149.8 (d,  $J = 2.8$  Hz), 139.7, 133.9, 130.3 (d,  $J = 8.5$  Hz), 128.9, 128.5, 127.3 (d,  $J = 7.8$  Hz), 127.0, 120.6 (d,  $J = 25.3$  Hz), 114.9 (d,  $J = 1.7$  Hz), 109.4 (d,  $J = 21.0$  Hz), 22.8;  $^{19}\text{F}$  NMR (282 MHz,  $\text{CDCl}_3$ )  $\delta -109.7 - -111.8$  (m); IR (Neat Film, NaCl) 3031, 2358, 1576, 1506, 1446, 1393, 1372, 1313, 1230, 1183, 1028, 972, 922, 904, 881, 822, 777, 764, 704  $\text{cm}^{-1}$ ; HRMS (MM:ESI-APCI+)  $m/z$  calc'd for  $\text{C}_{16}\text{H}_{13}\text{FN}$   $[\text{M}+\text{H}]^+$ : 238.1027, found 238.1027.

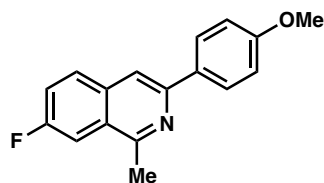**S1b**

**7-fluoro-3-(4-methoxyphenyl)-1-methylisoquinoline (S1b):** Compound **S1b** was prepared from triflate **5b** using general procedure 3 and purified by column chromatography (5% EtOAc in hexanes) to provide a white solid (110 mg, 99% yield):  $^1\text{H}$  NMR (400 MHz,  $\text{CDCl}_3$ )  $\delta$  8.10 – 8.04 (m, 2H), 7.87 – 7.81 (m, 2H), 7.70 (dd,  $J = 9.9, 2.6$  Hz, 1H), 7.44 (ddd,  $J = 9.0, 8.3, 2.5$  Hz, 1H), 7.06 – 6.99 (m, 2H), 3.88 (s, 3H), 2.98 (s, 3H);  $^{13}\text{C}$  NMR (100 MHz,  $\text{CDCl}_3$ )  $\delta$  160.4 (d,  $J = 248.5$  Hz), 160.1, 157.7 (d,  $J = 5.7$  Hz), 149.4 (d,  $J = 2.8$  Hz), 133.9, 132.2, 130.0 (d,  $J = 8.5$  Hz), 128.1, 126.7 (d,  $J = 7.7$  Hz), 120.5 (d,  $J = 25.3$  Hz), 114.2, 113.7 (d,  $J = 1.8$  Hz), 109.3 (d,  $J = 20.9$  Hz), 55.4, 22.7;  $^{19}\text{F}$  NMR (282 MHz,  $\text{CDCl}_3$ )  $\delta -111.9$  (ddd,  $J = 9.3, 9.1, 5.7$  Hz); IR (Neat Film, NaCl) 1608, 1514, 1443, 1393, 1288, 1252, 1186, 1029, 878, 863, 836, 821  $\text{cm}^{-1}$ ; HRMS (MM:ESI-APCI+)  $m/z$  calc'd for  $\text{C}_{17}\text{H}_{15}\text{FNO}$   $[\text{M}+\text{H}]^+$ : 268.1132, found 268.1133.

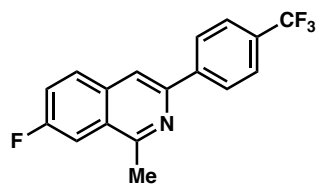**S1c**

**7-fluoro-1-methyl-3-(4-(trifluoromethyl)phenyl)isoquinoline (S1c):** Compound **S1c** was prepared from triflate **5b** using general procedure 3 and purified by column chromatography (5% EtOAc in hexanes) to provide a white solid (150 mg, 98% yield):  $^1\text{H}$  NMR (400 MHz,  $\text{CDCl}_3$ )  $\delta$  8.22 (d,  $J = 8.0$  Hz, 2H), 7.94 (s, 1H), 7.90 – 7.85 (m, 1H), 7.74 (d,  $J = 8.0$  Hz, 2H), 7.71 – 7.69 (m, 1H), 7.53 – 7.43 (m, 1H), 2.99 (s, 3H);  $^{13}\text{C}$  NMR (100 MHz,  $\text{CDCl}_3$ )  $\delta$  161.1 (d,  $J = 249.4$  Hz), 158.4 (d,  $J = 6.2$  Hz), 148.1, 143.0, 133.7, 130.4 (d,  $J = 8.5$  Hz), 130.2 (q,  $J = 32.4$  Hz), 127.8 (d,  $J = 8.1$  Hz), 127.2, 125.8 (q,  $J = 3.8$  Hz), 124.5 (q,  $J = 272.7$  Hz), 120.9 (d,  $J = 24.9$  Hz), 115.6, 109.5 (d,  $J = 21.4$  Hz), 22.8;  $^{19}\text{F}$  NMR (282 MHz,  $\text{CDCl}_3$ )  $\delta -62.5, -110.2$  (ddd,  $J = 9.9, 8.2, 5.5$  Hz); IR (Neat Film, NaCl) 1592, 1418, 1393, 1330, 1157, 1126, 1107, 1067, 880, 868, 847, 816  $\text{cm}^{-1}$ ; HRMS (MM:ESI-APCI+)  $m/z$  calc'd for  $\text{C}_{17}\text{H}_{12}\text{NF}_4$   $[\text{M}+\text{H}]^+$ : 306.0900, found 306.0895.



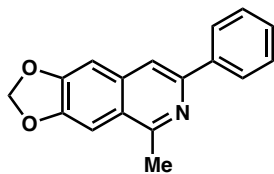**S1d**

**5-methyl-7-phenyl-[1,3]dioxolo[4,5-g]isoquinoline (S1d):** Compound **S1d** was prepared from triflate **5c** using general procedure 3 and purified by column chromatography (10% EtOAc in hexanes) to provide a white solid (153 mg, 97% yield):  $^1\text{H}$  NMR (400 MHz,  $\text{CDCl}_3$ )  $\delta$  8.08 (d,  $J = 7.2$  Hz, 2H), 7.77 (s, 1H), 7.52 – 7.44 (m, 2H), 7.41 – 7.32 (m, 2H), 7.11 (s, 1H), 6.10 (s, 2H), 2.92 (s, 3H);  $^{13}\text{C}$  NMR (100 MHz,  $\text{CDCl}_3$ )  $\delta$  156.4, 150.5, 149.5, 148.1, 140.0, 135.1, 128.7, 128.1, 126.8, 123.5, 115.1, 103.4, 101.9, 101.6, 23.0; IR (Neat Film, NaCl) 2914, 1591, 1486, 1462, 1232, 1189, 1039, 945, 878, 846, 695, 684  $\text{cm}^{-1}$ ; HRMS (MM:ESI-APCI+)  $m/z$  calc'd for  $\text{C}_{17}\text{H}_{14}\text{NO}_2$   $[\text{M}+\text{H}]^+$ : 264.1019, found 264.1021.

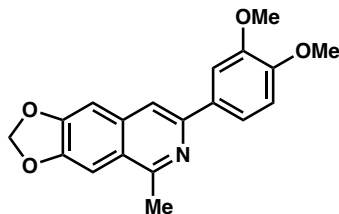**S1e**

**7-(3,4-dimethoxyphenyl)-5-methyl-[1,3]dioxolo[4,5-g]isoquinoline (S1e):** Compound **S1e** was prepared from triflate **5c** using general procedure 3 at 65 °C and purified by column chromatography via dry loading (40% EtOAc in hexanes) to provide a white solid (202 mg, 82% yield);  $^1\text{H}$  NMR (400 MHz,  $\text{CDCl}_3$ )  $\delta$  7.72 (d,  $J = 2.1$  Hz, 1H), 7.69 (s, 1H), 7.60 (dd,  $J = 8.3, 2.0$  Hz, 1H), 7.34 (s, 1H), 7.09 (s, 1H), 6.96 (d,  $J = 8.4$  Hz, 1H), 6.09 (s, 2H), 4.02 (s, 3H), 3.94 (s, 3H), 2.91 (s, 3H);  $^{13}\text{C}$  NMR (100 MHz,  $\text{CDCl}_3$ )  $\delta$  156.2, 150.5, 149.3, 149.2, 147.9, 135.2, 134.3, 133.0, 123.2, 119.1, 114.3, 111.2, 110.0, 103.3, 101.8, 101.5, 56.0, 56.0, 23.0; IR (Neat Film, NaCl) 2935, 1591, 1517, 1462, 1267, 1230, 1165, 1143, 1024, 872, 731  $\text{cm}^{-1}$ ; HRMS (MM:ESI-APCI+)  $m/z$  calc'd for  $\text{C}_{19}\text{H}_{18}\text{NO}_4$   $[\text{M}+\text{H}]^+$ : 324.1230, found 324.1229.

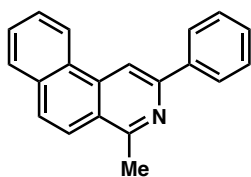**S1f**

**4-methyl-2-phenylbenzo[ ]isoquinoline (S1f):** Compound **S1f** was prepared from triflate **5d** using general procedure 3 and the product was collected via vacuum filtration to provide a white solid (246 mg, 63% yield);  $^1\text{H}$  NMR (400 MHz,  $\text{CDCl}_3$ )  $\delta$  8.55 – 8.40 (m, 2H), 7.96 – 7.88 (m, 2H), 7.73 (t,  $J = 8.7$  Hz, 1H), 7.69 – 7.61 (m, 1H), 7.54 (t,  $J = 8.3$  Hz, 1H), 7.45 – 7.42 (m, 2H), 7.26 (td,  $J = 7.6, 1.7$  Hz, 2H), 7.16 (td,  $J = 7.3, 1.7$  Hz, 1H), 2.81 (s, 3H);  $^{13}\text{C}$  NMR (100 MHz,

CDCl<sub>3</sub>)  $\delta$  157.9, 152.0, 140.3, 135.6, 133.4, 129.3, 128.8, 128.7, 128.5, 128.4, 127.7, 127.2, 127.1, 124.4, 123.4, 122.9, 111.0, 23.1; IR (Neat Film, NaCl) 2342, 1574, 1506, 1483, 1444, 1386, 1242, 1028, 876, 824, 760, 725, 692 cm<sup>-1</sup>; HRMS (MM:ESI-APCI+)  $m/z$  calc'd for C<sub>20</sub>H<sub>16</sub>N [M+H]<sup>+</sup>: 270.1277, found 270.1289.

#### General procedure 4: Oxidation and reduction to hydroxymethyl isoquinoline

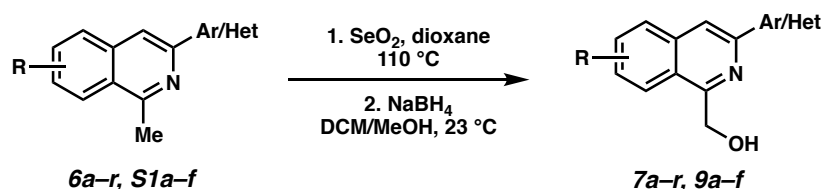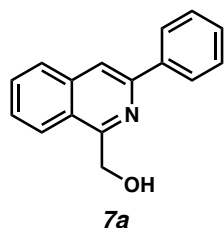

**(3-phenylisoquinolin-1-yl)methanol (7a):** This procedure has been adapted from a previous report.<sup>4</sup> To a 20-mL microwave vial containing a stir bar was added SeO<sub>2</sub> (140 mg, 1.26 mmol), isoquinoline **6a** (138 mg, 0.63 mmol), and 1,4-dioxane (13 mL, 0.05 M). The reaction vial was then sealed and heated to 110 °C while stirring for 2 hours. The reaction was then cooled to room temperature, filtered through celite, and rinsed with EtOAc. The filtrate was then concentrated in vacuo to afford the aldehyde intermediate, which was used in the next step without further purification.

A scintillation vial containing the crude in 4:1 DCM:MeOH (0.1 M) was added sodium borohydride (24 mg, 0.63 mmol) at room temperature. The reaction was stirred until no starting material remained by TLC, and then quenched by the addition of citric acid monohydrate (132 mg, 0.63 mmol). The reaction was stirred for an additional 10 minutes then basified by the addition of saturated aqueous NaHCO<sub>3</sub>. The layers were separated and the aqueous phase was extracted with CH<sub>2</sub>Cl<sub>2</sub>. The combined organic phases were dried over Na<sub>2</sub>SO<sub>4</sub> and concentrated in vacuo. The crude product was purified by column chromatography (20% acetone in hexanes) to afford **7a** as a white solid (100 mg, 68% yield over 2 steps): <sup>1</sup>H NMR (400 MHz, CDCl<sub>3</sub>)  $\delta$  8.18 – 8.15 (d,  $J$  = 7.0 Hz, 2H), 8.03 (s, 1H), 7.94 – 7.92 (m, 2H), 7.73 (ddd,  $J$  = 8.3, 6.9, 1.1 Hz, 1H), 7.61 (ddd,  $J$  = 8.1, 6.9, 1.2 Hz, 1H), 7.53 (t,  $J$  = 7.6 Hz, 2H), 7.46 – 7.42 (m, 1H), 5.31 (s, 2H), 5.26 (br s, 1H, OH); <sup>13</sup>C NMR (100 MHz, CDCl<sub>3</sub>)  $\delta$  157.4, 148.7, 138.9, 137.1, 130.9, 129.0, 128.9, 128.0, 127.5, 127.0, 124.2, 123.3, 116.3, 61.6; IR (Neat Film, NaCl) 3378, 3060, 2867, 1624, 1574, 1502, 1461, 1443, 1370, 1331, 1304, 1088, 1072, 1024, 1009, 882, 782, 766,

693  $\text{cm}^{-1}$ ; HRMS (MM:ESI-APCI+)  $m/z$  calc'd for  $\text{C}_{16}\text{H}_{14}\text{NO}$   $[\text{M}+\text{H}]^+$ : 236.1070, found 236.1078.

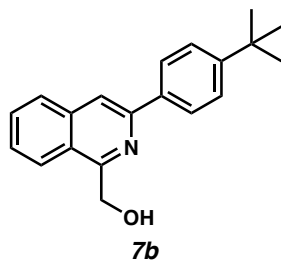

**((3-(4-(*tert*-butyl)phenyl)isoquinolin-1-yl)methanol (7b):** Compound **7b** was prepared from isoquinoline **6b** using general procedure 4 and purified by column chromatography (20% EtOAc in hexanes) to provide a white solid (162 mg, 95% yield);  $^1\text{H}$  NMR (400 MHz,  $\text{CDCl}_3$ )  $\delta$  8.20 – 8.06 (m, 2H), 8.00 (s, 1H), 7.97 – 7.85 (m, 2H), 7.72 (ddd,  $J = 8.4, 6.9, 1.2$  Hz, 1H), 7.62 – 7.58 (m, 1H), 7.58 – 7.52 (m, 2H), 5.30 (s, 3H), 1.40 (s, 9H);  $^{13}\text{C}$  NMR (100 MHz,  $\text{CDCl}_3$ )  $\delta$  157.2, 152.1, 148.7, 137.1, 136.2, 130.8, 127.9, 127.3, 126.7, 125.9, 124.1, 123.3, 115.9, 61.5, 34.9, 31.5; IR (Neat Film, NaCl) 3385, 2958, 1626, 1574, 1514, 1446, 1416, 1360, 1333, 1265, 1088, 1014, 841, 744, 680  $\text{cm}^{-1}$ ; HRMS (MM:ESI-APCI+)  $m/z$  calc'd for  $\text{C}_{20}\text{H}_{22}\text{NO}$   $[\text{M}+\text{H}]^+$ : 292.1696, found 292.1696.

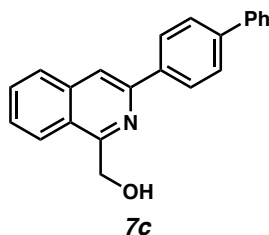

**(3-([1,1'-biphenyl]-4-yl)isoquinolin-1-yl)methanol (7c):** Compound **7c** was prepared from isoquinoline **6c** using general procedure 4 and purified by column chromatography (20% EtOAc in hexanes) to provide a colorless solid (181 mg, 92% yield);  $^1\text{H}$  NMR (400 MHz,  $\text{CDCl}_3$ )  $\delta$  8.30 – 8.20 (m, 2H), 8.07 (s, 1H), 7.98 – 7.88 (m, 2H), 7.81 – 7.66 (m, 5H), 7.62 (ddd,  $J = 8.4, 6.9, 1.2$  Hz, 1H), 7.49 (dd,  $J = 8.2, 6.8$  Hz, 2H), 7.43 – 7.34 (m, 1H), 5.32 (s, 3H);  $^{13}\text{C}$  NMR (100 MHz,  $\text{CDCl}_3$ )  $\delta$  157.4, 148.3, 141.7, 140.7, 137.8, 137.1, 130.9, 129.0, 128.0, 127.7, 127.7, 127.6, 127.3, 127.2, 124.2, 123.3, 116.2, 61.6; IR (Neat Film, NaCl) 3382, 3060, 2359, 1623, 1574, 1488, 1445, 1412, 1374, 1334, 1088, 1006, 840, 766, 729, 697  $\text{cm}^{-1}$ ; HRMS (MM:ESI-APCI+)  $m/z$  calc'd for  $\text{C}_{22}\text{H}_{18}\text{NO}$   $[\text{M}+\text{H}]^+$ : 312.1382, found 312.1383.

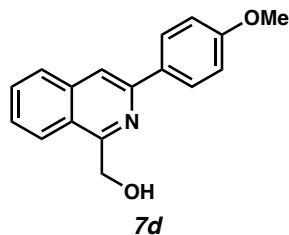

**(3-(4-methoxyphenyl)isoquinolin-1-yl)methanol (7d):** Compound **7d** was prepared from isoquinoline **6d** using general procedure 4 and purified by column chromatography (20% EtOAc in hexanes) to provide a white solid (48 mg, 73% yield):  $^1\text{H}$  NMR (400 MHz,  $\text{CDCl}_3$ )  $\delta$  8.14 – 8.07 (m, 2H), 7.93 (s, 1H), 7.91 – 7.85 (m, 2H), 7.69 (ddd,  $J = 8.2, 6.9, 1.1$  Hz, 1H), 7.56 (ddd,  $J = 8.2, 6.9, 1.2$  Hz, 1H), 7.06 – 7.03 (m, 2H), 5.28 (s, 3H), 3.89 (s, 3H);  $^{13}\text{C}$  NMR (100 MHz,  $\text{CDCl}_3$ )  $\delta$  160.3, 157.0, 148.3, 137.1, 131.4, 130.7, 128.1, 127.7, 127.0, 123.7, 123.1, 115.0, 114.2, 61.4, 55.4; IR (Neat Film, NaCl) 3376, 2928, 2836, 1608, 1573, 1515, 1442, 1372, 1334, 1287, 1250, 1175, 1087, 1032, 1010, 832, 750, 730  $\text{cm}^{-1}$ ; HRMS (MM:ESI-APCI+)  $m/z$  calc'd for  $\text{C}_{17}\text{H}_{16}\text{NO}_2$   $[\text{M}+\text{H}]^+$ : 266.1176, found 266.1185.

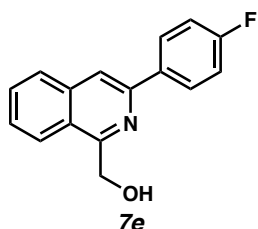

**(3-(4-fluorophenyl)isoquinolin-1-yl)methanol (7e):** Compound **7e** was prepared from isoquinoline **6e** using general procedure 4 and purified by column chromatography (20% EtOAc in hexanes) to provide a colorless solid (149 mg, 95% yield);  $^1\text{H}$  NMR (400 MHz,  $\text{CDCl}_3$ )  $\delta$  8.13 (dd,  $J = 8.9, 5.4$  Hz, 2H), 7.96 (s, 1H), 7.95 – 7.89 (m, 2H), 7.73 (ddd,  $J = 8.3, 6.9, 1.1$  Hz, 1H), 7.61 (ddd,  $J = 8.1, 6.9, 1.2$  Hz, 1H), 7.21 (dd,  $J = 8.9, 8.5$  Hz, 2H), 5.30 (s, 2H), 5.17 (br s, 1H, OH);  $^{13}\text{C}$  NMR (100 MHz,  $\text{CDCl}_3$ )  $\delta$  163.5 (d,  $J = 248.3$  Hz), 157.5, 147.8, 137.0, 135.1 (d,  $J = 3.2$  Hz), 131.0, 128.7 (d,  $J = 8.2$  Hz), 127.9, 127.6, 124.1, 123.3, 116.0, 115.8, 61.6;  $^{19}\text{F}$  NMR (282 MHz,  $\text{CDCl}_3$ )  $\delta$  -113.3 – -113.4 (m); IR (Neat Film, NaCl) 3382, 3059, 2354, 1622, 1604, 1574, 1512, 1446, 1331, 1230, 1157, 1087, 1011, 837, 750, 725  $\text{cm}^{-1}$ ; HRMS (MM:ESI-APCI+)  $m/z$  calc'd for  $\text{C}_{16}\text{H}_{13}\text{FNO}$   $[\text{M}+\text{H}]^+$ : 254.0974, found 254.0976.

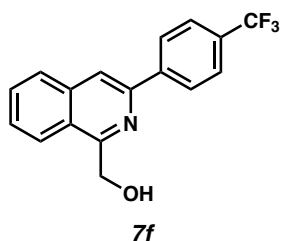

**(3-(4-(trifluoromethyl)phenyl)isoquinolin-1-yl)methanol (7f):** Compound **7f** was prepared from isoquinoline **6f** using general procedure 4 and purified by column chromatography (10% to 20% EtOAc in hexanes) to provide a white solid (23 mg, 25% yield);  $^1\text{H}$  NMR (400 MHz,  $\text{CDCl}_3$ )  $\delta$  8.26 (d,  $J = 7.8$  Hz, 2H), 8.07 (s, 1H), 8.00 – 7.92 (m, 2H), 7.82 – 7.73 (m, 3H), 7.70 – 7.61 (m, 1H), 5.32 (s, 2H), 5.10 (br s, 1H, OH);  $^{13}\text{C}$  NMR (100 MHz,  $\text{CDCl}_3$ )  $\delta$  157.9, 147.1, 142.3, 136.8, 131.2, 130.7 (q,  $J = 32.5$  Hz), 128.2, 128.1, 127.2, 125.9 (q,  $J = 3.8$  Hz), 124.6, 124.4 (q,  $J = 273.7$  Hz), 123.4, 117.2, 61.6;  $^{19}\text{F}$  NMR (282 MHz,  $\text{CDCl}_3$ )  $\delta$  -62.5; IR (Neat Film,

NaCl) 3408, 1623, 1574, 1418, 1324, 1166, 1111, 1075, 1014, 842, 753, 682  $\text{cm}^{-1}$ ; HRMS (MM:ESI-APCI+)  $m/z$  calc'd for  $\text{C}_{17}\text{H}_{13}\text{F}_3\text{NO}$   $[\text{M}+\text{H}]^+$ : 304.0944, found 304.0934.

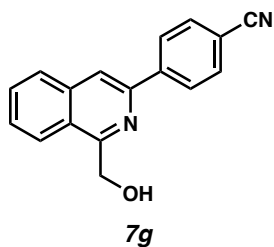

**4-(1-(hydroxymethyl)isoquinolin-3-yl)benzonitrile (7g):** Compound **7g** was prepared from isoquinoline **6g** using general procedure 4 and purified by column chromatography (30% EtOAc in hexanes) to provide a white solid (138 mg, 92% yield);  $^1\text{H}$  NMR (400 MHz,  $\text{CDCl}_3$ )  $\delta$  8.31 – 8.18 (m, 2H), 8.09 (s, 1H), 7.97 (m, 2H), 7.86 – 7.74 (m, 3H), 7.68 (ddd,  $J = 8.2, 6.9, 1.2$  Hz, 1H), 5.32 (s, 2H), 4.99 (s, 1H);  $^{13}\text{C}$  NMR (100 MHz,  $\text{CDCl}_3$ )  $\delta$  158.2, 146.5, 143.2, 136.7, 132.8, 131.4, 128.5, 128.2, 127.4, 124.7, 123.5, 119.0, 117.7, 112.3, 61.7; IR (Neat Film, NaCl) 3404, 2895, 2358, 2224, 1416, 1332, 1303, 1085, 1006, 840, 764, 682  $\text{cm}^{-1}$ ; HRMS (MM:ESI-APCI+)  $m/z$  calc'd for  $\text{C}_{17}\text{H}_{13}\text{N}_2\text{O}$   $[\text{M}+\text{H}]^+$ : 261.1022, found 261.1032.

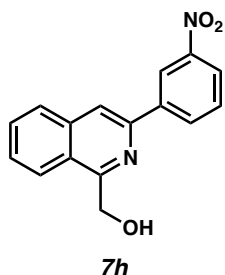

**(3-(3-nitrophenyl)isoquinolin-1-yl)methanol (7h):** Compound **7h** was prepared from isoquinoline **6h** using general procedure 4 and purified by column chromatography (20% EtOAc in  $\text{CH}_2\text{Cl}_2$ ) to provide a white solid (67 mg, 38% yield);  $^1\text{H}$  NMR (400 MHz,  $\text{CDCl}_3$ )  $\delta$  8.95 (t,  $J = 2.0$  Hz, 1H), 8.52 (dt,  $J = 7.9, 1.3$  Hz, 1H), 8.27 (ddd,  $J = 8.2, 2.3, 1.1$  Hz, 1H), 8.11 (s, 1H), 8.04 – 7.90 (m, 2H), 7.78 (ddd,  $J = 8.0, 6.9, 1.2$  Hz, 1H), 7.73 – 7.60 (m, 2H), 5.33 (s, 2H), 4.96 (br s, 1H, OH);  $^{13}\text{C}$  NMR (100 MHz,  $\text{CDCl}_3$ )  $\delta$  158.2, 149.0, 146.1, 140.7, 136.8, 132.7, 131.4, 129.9, 128.4, 128.2, 124.7, 123.5, 123.4, 121.6, 117.2, 61.7; IR (Neat Film, NaCl) 3389, 2614, 1538, 1520, 1505, 1353, 1333, 1088, 1007, 892, 751, 690  $\text{cm}^{-1}$ ; HRMS (MM:ESI-APCI+)  $m/z$  calc'd for  $\text{C}_{16}\text{H}_{13}\text{N}_2\text{O}_3$   $[\text{M}+\text{H}]^+$ : 281.0921, found 281.0930.

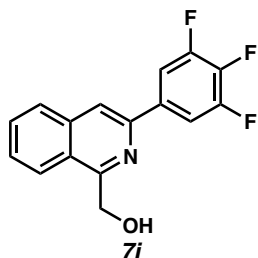

**(3-(3,4,5-trifluorophenyl)isoquinolin-1-yl)methanol (7i):** Compound **7i** was prepared from isoquinoline **6i** using general procedure 4 and purified by column chromatography (20% EtOAc in hexanes) to provide a white solid (90 mg, 82% yield);  $^1\text{H}$  NMR (400 MHz,  $\text{CDCl}_3$ )  $\delta$  7.99 – 7.89 (m, 3H), 7.84 – 7.71 (m, 3H), 7.65 (ddd,  $J = 8.2, 6.9, 1.3$  Hz, 1H), 5.30 (s, 2H), 4.89 (br s, 1H, OH);  $^{13}\text{C}$  NMR (100 MHz,  $\text{CDCl}_3$ )  $\delta$  158.0, 151.7 (ddd,  $J = 249.3, 10.2, 4.1$  Hz), 145.4 (d,  $J = 2.5$  Hz), 140.2 (dt,  $J = 253.9, 15.7$  Hz), 136.7, 135.1 (td,  $J = 7.6, 4.5$  Hz), 131.4, 128.3, 128.0, 124.5, 123.4, 116.6 (d,  $J = 1.4$  Hz), 110.9 – 110.7 (m), 61.7;  $^{19}\text{F}$  NMR (282 MHz,  $\text{CDCl}_3$ )  $\delta$  –133.8 – –133.9 (m), –160.1 – –160.3 (m); IR (Neat Film, NaCl) 3351, 2882, 1557, 1531, 1451, 1350, 1326, 1080, 1039, 1008, 864, 848, 778, 747, 706  $\text{cm}^{-1}$ ; HRMS (MM:ESI-APCI+)  $m/z$  calc'd for  $\text{C}_{16}\text{H}_{11}\text{F}_3\text{NO}$   $[\text{M}+\text{H}]^+$ : 290.0787, found 290.0795.

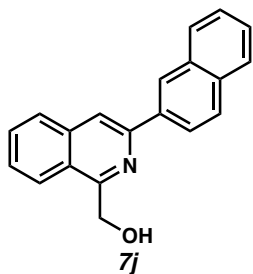

**(3-(naphthalen-2-yl)isoquinolin-1-yl)methanol (7j):** Compound **7j** was prepared from isoquinoline **6j** using general procedure 4 and purified by column chromatography (20% EtOAc in hexanes) to provide a white solid (158 mg, 97% yield);  $^1\text{H}$  NMR (400 MHz,  $\text{CDCl}_3$ )  $\delta$  8.67 (s, 1H), 8.27 (dd,  $J = 8.6, 1.8$  Hz, 1H), 8.16 (s, 1H), 8.05 – 7.93 (m, 4H), 7.91 – 7.89 (m, 1H), 7.75 (ddd,  $J = 8.2, 6.9, 1.1$  Hz, 1H), 7.62 (ddd,  $J = 8.2, 6.9, 1.2$  Hz, 1H), 7.58 – 7.47 (m, 2H), 5.34 (s, 3H);  $^{13}\text{C}$  NMR (100 MHz,  $\text{CDCl}_3$ )  $\delta$  157.5, 148.5, 137.1, 136.2, 133.7, 133.7, 130.9, 128.8, 128.6, 128.0, 127.8, 127.6, 126.7, 126.6, 126.3, 124.6, 124.2, 123.3, 116.6, 61.6; IR (Neat Film, NaCl) 3393, 3056, 1622, 1573, 1506, 1445, 1410, 1375, 1344, 1314, 1086, 1008, 856, 817, 744  $\text{cm}^{-1}$ ; HRMS (MM:ESI-APCI+)  $m/z$  calc'd for  $\text{C}_{20}\text{H}_{16}\text{NO}$   $[\text{M}+\text{H}]^+$ : 286.1231, found 286.1226.

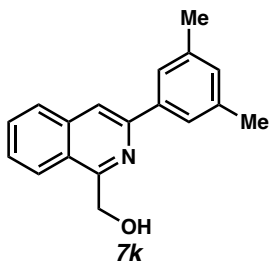

**(3-(3,5-dimethylphenyl)isoquinolin-1-yl)methanol (7k):** Compound **7k** was prepared from isoquinoline **6k** using general procedure 4 and purified by column chromatography (20% EtOAc in hexanes) to provide a white solid (155 mg, 95% yield);  $^1\text{H}$  NMR (400 MHz,  $\text{CDCl}_3$ )  $\delta$  8.00 (s, 1H), 7.94 – 7.91 (m, 2H), 7.78 – 7.76 (m, 2H), 7.72 (ddd,  $J = 8.3, 6.9, 1.2$  Hz, 1H), 7.60 (ddd,  $J = 8.2, 6.9, 1.2$  Hz, 1H), 7.09 (s, 1H), 5.30 (s, 3H), 2.44 (s, 6H);  $^{13}\text{C}$  NMR (100 MHz,  $\text{CDCl}_3$ )  $\delta$  157.2, 149.0, 138.9, 138.5, 137.1, 130.8, 130.6, 127.9, 127.4, 124.8, 124.1, 123.3, 116.3, 61.6, 21.7; IR (Neat Film, NaCl) 3382, 2913, 2338, 1622, 1574, 1503, 1444, 1379, 1332, 1084, 1011,

882, 849, 824, 750, 709  $\text{cm}^{-1}$ ; HRMS (MM:ESI-APCI+)  $m/z$  calc'd for  $\text{C}_{18}\text{H}_{18}\text{NO}$   $[\text{M}+\text{H}]^+$ : 264.1382, found 264.1383.

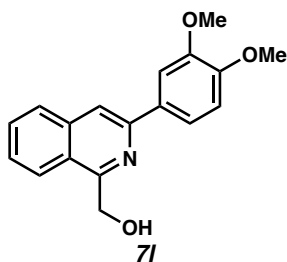

**(3-(3,4-dimethoxyphenyl)isoquinolin-1-yl)methanol (7l):** Compound **7l** was prepared from isoquinoline **6l** using general procedure 4 and purified by column chromatography (40% EtOAc in hexanes) to provide a white solid (180 mg, 91% yield);  $^1\text{H}$  NMR (400 MHz,  $\text{CDCl}_3$ )  $\delta$  7.95 (s, 1H), 7.93 – 7.90 (m, 2H), 7.77 – 7.67 (m, 3H), 7.58 (ddd,  $J = 8.2, 6.9, 1.2$  Hz, 1H), 7.03 – 7.01 (m, 1H), 5.30 (s, 2H), 5.26 (br s, 1H, OH), 4.03 (s, 3H), 3.97 (s, 3H);  $^{13}\text{C}$  NMR (100 MHz,  $\text{CDCl}_3$ )  $\delta$  157.0, 149.8, 149.3, 148.3, 137.0, 131.8, 130.7, 127.7, 127.1, 123.8, 123.2, 119.5, 115.3, 111.3, 110.0, 61.4, 56.1, 56.0; IR (Neat Film, NaCl) 3372, 2936, 2838, 1623, 1604, 1573, 1518, 1456, 1438, 1314, 1260, 1237, 1134, 1027, 1008  $\text{cm}^{-1}$ ; HRMS (MM:ESI-APCI+)  $m/z$  calc'd for  $\text{C}_{18}\text{H}_{18}\text{NO}_3$   $[\text{M}+\text{H}]^+$ : 296.1284, found 296.1283.

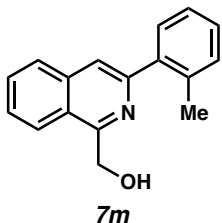

**(3-(o-tolyl)isoquinolin-1-yl)methanol (7m):** Compound **7m** was prepared from isoquinoline **6m** using general procedure 4 and purified by column chromatography (15% EtOAc in hexanes) to provide a white solid (130 mg, 79% yield);  $^1\text{H}$  NMR (400 MHz,  $\text{CDCl}_3$ )  $\delta$  7.96 (dd,  $J = 8.4, 1.1$  Hz, 1H), 7.91 (dd,  $J = 8.2, 1.2$  Hz, 1H), 7.75 (ddd,  $J = 8.3, 6.9, 1.2$  Hz, 1H), 7.71 (s, 1H), 7.64 (ddd,  $J = 8.3, 6.8, 1.3$  Hz, 1H), 7.53 (d,  $J = 6.6$  Hz, 1H), 7.39 – 7.29 (m, 3H), 5.30 (s, 2H), 5.14 (s, 1H), 2.45 (s, 3H);  $^{13}\text{C}$  NMR (100 MHz,  $\text{CDCl}_3$ )  $\delta$  156.8, 151.4, 140.1, 136.7, 136.5, 131.0, 130.8, 130.2, 128.4, 127.8, 127.6, 126.1, 123.7, 123.3, 120.0, 61.6, 20.9; IR (Neat Film, NaCl) 3389, 3057, 2932, 1626, 1573, 1502, 1455, 1402, 1377, 1330, 1087, 1069, 1008, 884, 786, 757, 727  $\text{cm}^{-1}$ ; HRMS (MM:ESI-APCI+)  $m/z$  calc'd for  $\text{C}_{17}\text{H}_{16}\text{NO}$   $[\text{M}+\text{H}]^+$ : 250.1226, found 250.1232.

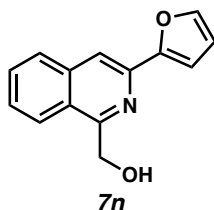

**(3-(furan-2-yl)isoquinolin-1-yl)methanol (7n):** Compound **7n** was prepared from isoquinoline **6n** using general procedure 4 and purified by column chromatography (20% EtOAc in hexanes) to provide a white solid (56 mg, 52% yield):  $^1\text{H}$  NMR (400 MHz,  $\text{CDCl}_3$ )  $\delta$  7.94 – 7.92 (m, 1H), 7.90 – 7.82 (m, 2H), 7.70 – 7.66 (m, 1H), 7.60 – 7.50 (m, 2H), 7.16 – 7.14 (m, 1H), 6.58 – 6.56 (m, 1H), 5.23 (s, 2H), 5.05 (br s, 1H, OH);  $^{13}\text{C}$  NMR (100 MHz,  $\text{CDCl}_3$ )  $\delta$  157.5, 153.7, 143.1, 140.9, 136.6, 130.9, 127.8, 127.2, 124.0, 123.3, 113.6, 112.1, 108.6, 61.3; IR (Neat Film, NaCl) 3390, 3118, 2886, 1624, 1574, 1492, 1372, 1323, 1306, 1157, 1092, 1079, 1006, 884, 836, 743  $\text{cm}^{-1}$ ; HRMS (MM:ESI-APCI+)  $m/z$  calc'd for  $\text{C}_{14}\text{H}_{12}\text{NO}_2$   $[\text{M}+\text{H}]^+$ : 226.0863, found 226.0871.

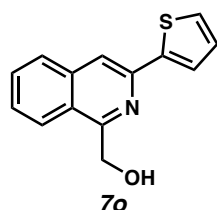

**(3-(thiophen-2-yl)isoquinolin-1-yl)methanol (7o):** Compound **7o** was prepared from isoquinoline **6o** (0.5 mmol) using general procedure 4 and purified by column chromatography (10% to 20% EtOAc in hexanes) to provide a white solid (46 mg, 38% yield):  $^1\text{H}$  NMR (400 MHz,  $\text{CDCl}_3$ )  $\delta$  7.89 (s, 1H), 7.88 – 7.83 (m, 2H), 7.75 – 7.65 (m, 2H), 7.55 (ddd,  $J = 8.2, 6.9, 1.2$  Hz, 1H), 7.41 (dd,  $J = 5.0, 1.2$  Hz, 1H), 7.16 (dd,  $J = 5.0, 3.6$  Hz, 1H), 5.25 (s, 2H), 5.02 (br s, 1H, OH);  $^{13}\text{C}$  NMR (100 MHz,  $\text{CDCl}_3$ )  $\delta$  157.4, 144.4, 144.1, 136.8, 131.0, 128.2, 127.6, 127.2, 127.0, 124.1, 124.0, 123.3, 114.0, 61.3; IR (Neat Film, NaCl) 3382, 3066, 2868, 1621, 1589, 1573, 1501, 1452, 1402, 1329, 1084, 1006, 878, 822, 748, 701  $\text{cm}^{-1}$ ; HRMS (MM:ESI-APCI+)  $m/z$  calc'd for  $\text{C}_{14}\text{H}_{12}\text{NOS}$   $[\text{M}+\text{H}]^+$ : 242.0634, found 242.0637.

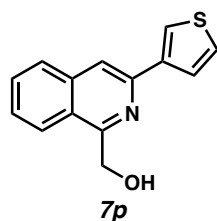

**(3-(thiophen-3-yl)isoquinolin-1-yl)methanol (7p):** Compound **7p** was prepared from isoquinoline **6p** (0.58 mmol) using general procedure 4 and purified by column chromatography (20% EtOAc in hexanes) to provide a white solid (127 mg, 91% yield):  $^1\text{H}$  NMR (400 MHz,  $\text{CDCl}_3$ )  $\delta$  8.06 (dd,  $J = 3.1, 1.3$  Hz, 1H), 7.94 – 7.84 (m, 3H), 7.76 (dd,  $J = 5.1, 1.3$  Hz, 1H), 7.71 (ddd,  $J = 8.2, 6.9, 1.1$  Hz, 1H), 7.58 (ddd,  $J = 8.2, 6.9, 1.1$  Hz, 1H), 7.45 (dd,  $J = 5.1, 3.0$  Hz, 1H), 5.27 (s, 2H), 5.19 (br s, 1H);  $^{13}\text{C}$  NMR (100 MHz,  $\text{CDCl}_3$ )  $\delta$  157.4, 145.0, 141.7, 137.0, 130.9, 127.8, 127.3, 126.6, 126.0, 124.1, 123.4, 123.4, 115.6, 61.5; IR (Neat Film, NaCl) 3372, 3098, 2888, 2363, 1622, 1594, 1573, 1456, 1350, 1318, 1299, 1086, 1008, 880, 842, 793, 748, 697  $\text{cm}^{-1}$ ; HRMS (MM:ESI-APCI+)  $m/z$  calc'd for  $\text{C}_{14}\text{H}_{12}\text{NOS}$   $[\text{M}+\text{H}]^+$ : 242.0634, found 242.0631.



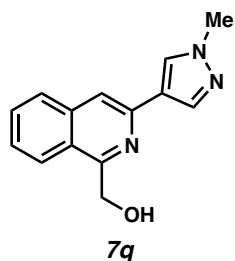

**(3-(1-methyl-1H-pyrazol-4-yl)isoquinolin-1-yl)methanol (7q):** Compound **7q** was prepared from isoquinoline **6q** using general procedure 4 and purified by column chromatography (70% to 80% EtOAc in hexanes + 1% NEt<sub>3</sub>) to provide a pale beige solid (72 mg, 62% yield): <sup>1</sup>H NMR (400 MHz, CDCl<sub>3</sub>) δ 8.08 – 7.95 (m, 2H), 7.85 – 7.79 (m, 2H), 7.71 – 7.59 (m, 2H), 7.53 – 7.49 (m, 1H), 5.21 (s, 2H), 3.98 (s, 3H); <sup>13</sup>C NMR (100 MHz, CDCl<sub>3</sub>) δ 157.3, 143.2, 137.3, 136.9, 130.8, 128.8, 127.2, 126.7, 123.5, 123.2, 114.1, 61.2, 39.2; IR (Neat Film, NaCl) 3370, 3068, 2937, 1626, 1603, 1573, 1503, 1416, 1321, 1278, 1186, 1092, 1011, 845, 753, 702 cm<sup>-1</sup>; HRMS (MM:ESI-APCI+) *m/z* calc'd for C<sub>14</sub>H<sub>14</sub>N<sub>3</sub>O [M+H]<sup>+</sup>: 240.1131, found 240.1123.

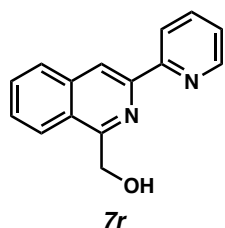

**(3-(pyridin-2-yl)isoquinolin-1-yl)methanol (7r):** Compound **7r** was prepared from isoquinoline **6r** using general procedure 4 and purified by column chromatography (10% to 20% acetone in CH<sub>2</sub>Cl<sub>2</sub> + 1% NEt<sub>3</sub>) to provide a pale cream solid (52 mg, 86% yield): <sup>1</sup>H NMR (400 MHz, CDCl<sub>3</sub>) δ 8.74 – 8.72 (m, 2H), 8.52 (d, *J* = 8.2 Hz, 1H), 8.00 (d, *J* = 8.3 Hz, 1H), 7.94 (d, *J* = 8.3 Hz, 1H), 7.86 (td, *J* = 7.8, 1.8 Hz, 1H), 7.78 – 7.69 (m, 1H), 7.63 (ddd, *J* = 8.1, 6.8, 1.2 Hz, 1H), 7.33 (ddd, *J* = 7.5, 4.8, 1.2 Hz, 1H), 5.31 (s, 2H), 5.13 (br s, 1H, OH); <sup>13</sup>C NMR (100 MHz, CDCl<sub>3</sub>) δ 157.2, 155.8, 149.5, 147.3, 137.2, 137.0, 130.9, 128.7, 128.1, 125.1, 123.6, 123.3, 121.1, 117.6, 61.6; IR (Neat Film, NaCl) 3390, 3048, 2359, 1622, 1583, 1474, 1428, 1333, 1309, 1166, 1087, 1009, 897, 793, 747, 681 cm<sup>-1</sup>; HRMS (MM:ESI-APCI+) *m/z* calc'd for C<sub>15</sub>H<sub>13</sub>N<sub>2</sub>O [M+H]<sup>+</sup>: 237.1022, found 237.1020.

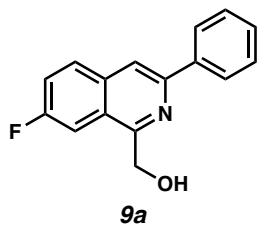

**(7-fluoro-3-phenylisoquinolin-1-yl)methanol (9a):** Compound **9a** was prepared from isoquinoline **S1a** using general procedure 4 and purified by column chromatography (10% EtOAc in hexanes) to provide a white solid (94 mg, 81% yield): <sup>1</sup>H NMR (400 MHz, CDCl<sub>3</sub>) δ

8.13 (d,  $J = 8.0$  Hz, 2H), 8.00 (s, 1H), 7.96 – 7.87 (m, 1H), 7.57 – 7.47 (m, 4H), 7.44 (td,  $J = 6.9, 6.4, 1.4$  Hz, 1H), 5.21 (s, 2H), 5.11 (br s, 1H, OH);  $^{13}\text{C}$  NMR (100 MHz,  $\text{CDCl}_3$ )  $\delta$  161.0 (d,  $J = 250.3$  Hz), 156.8 (d,  $J = 5.9$  Hz), 148.4, 138.6, 134.1, 130.5 (d,  $J = 8.6$  Hz), 129.0, 126.8, 124.7 (d,  $J = 8.5$  Hz), 121.4 (d,  $J = 25.2$  Hz), 115.9 (d,  $J = 2.0$  Hz), 107.2 (d,  $J = 21.3$  Hz), 61.6;  $^{19}\text{F}$  NMR (282 MHz,  $\text{CDCl}_3$ )  $\delta$  -109.5 – -109.6 (m); IR (Neat Film, NaCl) 3393, 3063, 2878, 1594, 1579, 1506, 1417, 1392, 1321, 1232, 1185, 1085, 1015, 930, 777, 694  $\text{cm}^{-1}$ ; HRMS (MM:ESI-APCI+)  $m/z$  calc'd for  $\text{C}_{16}\text{H}_{13}\text{FNO}$   $[\text{M}+\text{H}]^+$ : 254.0976, found 254.0968.

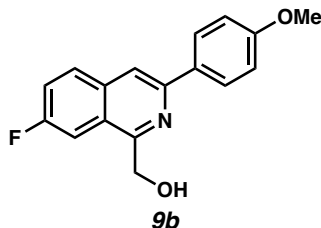

**(7-fluoro-3-(4-methoxyphenyl)isoquinolin-1-yl)methanol (9b):** Compound **9b** was prepared from isoquinoline **S1b** using general procedure 4 and purified by column chromatography (20% EtOAc in hexanes) to provide a white solid (116 mg, 99% yield):  $^1\text{H}$  NMR (400 MHz,  $\text{CDCl}_3$ )  $\delta$  8.10 – 8.08 (m, 2H), 7.93 (s, 1H), 7.92 – 7.88 (m, 1H), 7.52 – 7.45 (m, 2H), 7.07 – 7.02 (m, 2H), 5.21 (s, 2H), 5.14 (s, 1H), 3.90 (s, 3H);  $^{13}\text{C}$  NMR (100 MHz,  $\text{CDCl}_3$ )  $\delta$  160.8 (d,  $J = 249.0$  Hz), 160.5, 156.6 (d,  $J = 5.9$  Hz), 148.3 (d,  $J = 2.9$  Hz), 134.3, 131.3, 130.4 (d,  $J = 8.6$  Hz), 128.1, 124.3 (d,  $J = 8.2$  Hz), 121.4 (d,  $J = 25.3$  Hz), 114.8 (d,  $J = 1.7$  Hz), 114.4, 107.2 (d,  $J = 21.3$  Hz), 61.6, 55.6;  $^{19}\text{F}$  NMR (282 MHz,  $\text{CDCl}_3$ )  $\delta$  -110.2 (ddd,  $J = 8.9, 8.8, 5.5$  Hz); IR (Neat Film, NaCl) 3388, 2936, 1608, 1593, 1516, 1389, 1289, 1251, 1180, 1069, 1032, 1015, 929, 835  $\text{cm}^{-1}$ ; HRMS (MM:ESI-APCI+)  $m/z$  calc'd for  $\text{C}_{17}\text{H}_{15}\text{FNO}_2$   $[\text{M}+\text{H}]^+$ : 284.1081, found 284.1074.

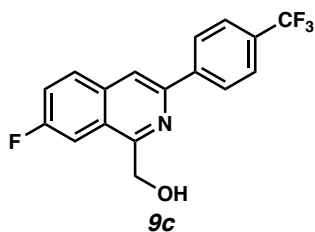

**(7-fluoro-3-(4-(trifluoromethyl)phenyl)isoquinolin-1-yl)methanol (9c):** Compound **9c** was prepared from isoquinoline **S1c** using general procedure 4 and purified by column chromatography (10% EtOAc in hexanes) to provide a white solid (80 mg, 60% yield):  $^1\text{H}$  NMR (400 MHz,  $\text{CDCl}_3$ )  $\delta$  8.20 (d,  $J = 8.1$  Hz, 2H), 8.02 (s, 1H), 7.95 (dd,  $J = 9.8, 5.4$  Hz, 1H), 7.74 (d,  $J = 8.3$  Hz, 2H), 7.58 – 7.47 (m, 2H), 5.21 (s, 2H), 4.94 (br s, 1H, OH);  $^{13}\text{C}$  NMR (100 MHz,  $\text{CDCl}_3$ )  $\delta$  161.3 (d,  $J = 251.5$  Hz), 157.3 (d,  $J = 5.9$  Hz), 146.8 (d,  $J = 2.9$  Hz), 141.8 (d,  $J = 1.5$  Hz), 133.8, 130.7 (d,  $J = 8.7$  Hz), 130.7 (q,  $J = 33.3$  Hz), 127.0, 125.9 (q,  $J = 3.8$  Hz), 125.2 (d,  $J = 8.4$  Hz), 124.3 (q,  $J = 272.7$  Hz), 121.7 (d,  $J = 25.3$  Hz), 116.8 (d,  $J = 1.7$  Hz), 107.4 (d,  $J = 21.5$  Hz), 61.7;  $^{19}\text{F}$  NMR (282 MHz,  $\text{CDCl}_3$ )  $\delta$  -62.5, -108.4 (ddd,  $J = 8.7, 8.7, 5.4$  Hz); IR (Neat Film, NaCl) 3410, 2886, 1619, 1597, 1504, 1416, 1391, 1328, 1233, 1165, 1124, 1111, 1074,

1016, 931, 847, 680  $\text{cm}^{-1}$ ; HRMS (MM:ESI-APCI+)  $m/z$  calc'd for  $\text{C}_{17}\text{H}_{12}\text{F}_4\text{NO}$   $[\text{M}+\text{H}]^+$ : 322.0850, found 322.0839.

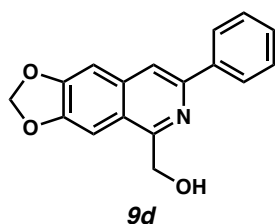

**(7-phenyl-[1,3]dioxolo[4,5-g]isoquinolin-5-yl)methanol (9d):** Compound **9d** was prepared from isoquinoline **S1d** using general procedure 4 and purified by column chromatography (30% to 40% EtOAc in hexanes) to provide a white solid (135 mg, 83% yield):  $^1\text{H}$  NMR (400 MHz,  $\text{CDCl}_3$ )  $\delta$  8.13 – 8.05 (m, 2H), 7.82 (s, 1H), 7.50 (m, 2H), 7.44 – 7.37 (m, 1H), 7.15 – 7.06 (m, 2H), 6.10 (s, 2H), 5.28 (br s, 1H, OH), 5.10 (s, 2H);  $^{13}\text{C}$  NMR (100 MHz,  $\text{CDCl}_3$ )  $\delta$  154.9, 151.1, 148.6, 147.8, 138.9, 135.4, 128.8, 128.5, 126.6, 120.9, 115.9, 103.6, 101.9, 99.3, 61.4; IR (Neat Film, NaCl) 3324, 2914, 2355, 1597, 1497, 1463, 1436, 1422, 1236, 1066, 1036, 995, 940, 877, 775, 692  $\text{cm}^{-1}$ ; HRMS (MM:ESI-APCI+)  $m/z$  calc'd for  $\text{C}_{17}\text{H}_{14}\text{NO}_3$   $[\text{M}+\text{H}]^+$ : 280.0968, found 280.0975.

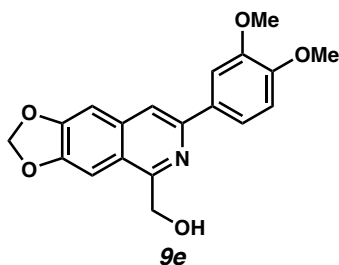

**(7-(3,4-dimethoxyphenyl)-[1,3]dioxolo[4,5-g]isoquinolin-5-yl)methanol (9e):** Compound **9e** was prepared from isoquinoline **S1e** using general procedure 4 and purified by column chromatography (40% EtOAc in hexanes) via dry-loading to provide a pale pink solid (126 mg, 65% yield):  $^1\text{H}$  NMR (400 MHz,  $\text{CDCl}_3$ )  $\delta$  7.77 (s, 1H), 7.69 – 7.60 (m, 2H), 7.16 – 7.07 (m, 2H), 6.99 (d,  $J = 8.2$  Hz, 1H), 6.11 (s, 2H), 5.26 (br s, 1H, OH), 5.11 (s, 2H), 4.01 (s, 3H), 3.96 (s, 3H);  $^{13}\text{C}$  NMR (100 MHz,  $\text{CDCl}_3$ )  $\delta$  154.7, 151.1, 149.7, 149.2, 148.4, 147.7, 135.5, 131.9, 120.6, 119.2, 115.1, 111.3, 109.7, 103.5, 101.8, 99.3, 61.4, 56.0, 56.0; IR (Neat Film, NaCl) 3378, 2912, 2353, 1595, 1519, 1496, 1463, 1456, 1435, 1258, 1234, 1034, 862, 730  $\text{cm}^{-1}$ ; HRMS (MM:ESI-APCI+)  $m/z$  calc'd for  $\text{C}_{19}\text{H}_{18}\text{NO}_5$   $[\text{M}+\text{H}]^+$ : 340.1179, found 340.1172.

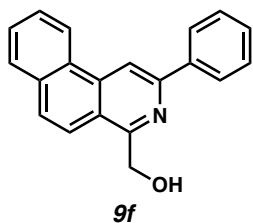

**(2-phenylbenzo[*f*]isoquinolin-4-yl)methanol (9f):** Compound **9f** was prepared from isoquinoline **S1f** using general procedure 4 and purified by column chromatography (20% EtOAc in hexanes) to provide a white solid (51 mg, 62% yield):  $^1\text{H}$  NMR (400 MHz,  $\text{CDCl}_3$ )  $\delta$  8.78 – 8.76 (m, 2H), 8.23 – 8.20 (m, 2H), 7.94 – 7.92 (m, 1H), 7.88 – 7.78 (m, 1H), 7.78 – 7.62 (m, 3H), 7.57 (t,  $J = 7.5$  Hz, 2H), 7.48 (t,  $J = 7.3$  Hz, 1H), 5.46 – 5.19 (m, 3H);  $^{13}\text{C}$  NMR (100 MHz,  $\text{CDCl}_3$ )  $\delta$  156.3, 150.4, 139.2, 135.9, 133.5, 129.0, 129.0, 129.0, 128.8, 128.6, 127.5, 127.1, 123.5, 122.1, 120.0, 120.0, 111.7, 61.7; IR (Neat Film, NaCl) 3322, 3064, 2890, 1589, 1494, 1428, 1386, 1304, 1242, 1081, 1050, 814, 747  $\text{cm}^{-1}$ ; HRMS (MM:ESI-APCI+)  $m/z$  calc'd for  $\text{C}_{20}\text{H}_{16}\text{NO}$   $[\text{M}+\text{H}]^+$ : 286.1226, found 286.1235.

### Syntheses of 1,3-Disubstituted Isoquinolines with Different Directing Groups

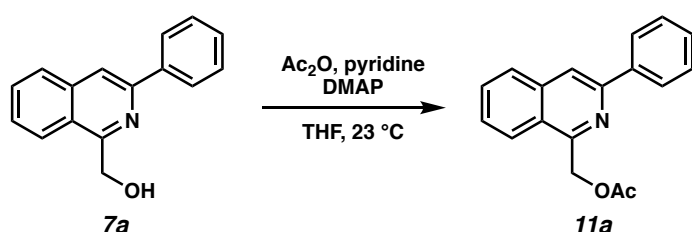

**(3-phenylisoquinolin-1-yl)methyl acetate (11a):** To a scintillation vial containing a stir bar and isoquinoline **7a** (165 mg, 0.70 mmol) in THF (7 mL, 0.1 M) was added DMAP (8.6 mg, 0.07 mmol) and pyridine (0.14 mL, 1.75 mmol). Acetic anhydride (0.1 mL, 1.05 mmol) was then added dropwise. The reaction was stirred overnight at room temperature then diluted with Et<sub>2</sub>O and washed with saturated aqueous  $\text{NH}_4\text{Cl}$ . The organic phase was collected, dried over  $\text{Na}_2\text{SO}_4$  and concentrated in vacuo. The crude product was purified by column chromatography (10% EtOAc in hexanes) to afford **11a** as a colorless viscous oil (194 mg, >99% yield):  $^1\text{H}$  NMR (400 MHz,  $\text{CDCl}_3$ )  $\delta$  8.19 – 8.13 (m, 2H), 8.11 (dd,  $J = 8.4, 1.0$  Hz, 1H), 8.07 (s, 1H), 7.92 (dt,  $J = 8.3, 0.9$  Hz, 1H), 7.71 (ddd,  $J = 8.2, 6.8, 1.2$  Hz, 1H), 7.61 (ddd,  $J = 8.2, 6.8, 1.3$  Hz, 1H), 7.54 – 7.47 (m, 2H), 7.45 – 7.38 (m, 1H), 5.79 (s, 2H), 2.20 (s, 3H);  $^{13}\text{C}$  NMR (100 MHz,  $\text{CDCl}_3$ )  $\delta$  170.9, 154.4, 150.2, 139.3, 137.5, 130.5, 128.9, 128.7, 128.0, 127.6, 127.1, 126.0, 124.8, 117.2, 66.1, 21.1; IR (Neat Film, NaCl) 2826, 2364, 1704, 1574, 1455, 1333, 1054, 904, 783, 764, 748, 719, 678  $\text{cm}^{-1}$ ; HRMS (MM:ESI-APCI+)  $m/z$  calc'd for  $\text{C}_{18}\text{H}_{16}\text{NO}_2$   $[\text{M}+\text{H}]^+$ : 278.1176, found 278.1178.

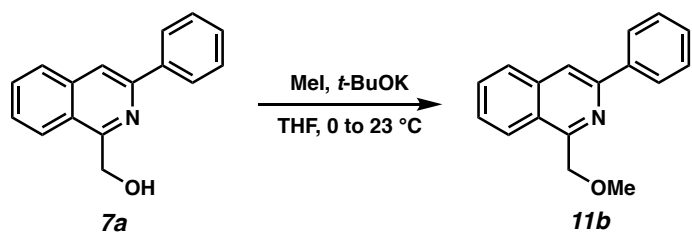

**1-(methoxymethyl)-3-phenylisoquinoline (11b):** To a scintillation vial containing a stir bar and isoquinoline **7a** (165 mg, 0.70 mmol) in THF (7 mL, 0.1 M) was added  $\text{KO}t\text{-Bu}$  (86 mg, 0.77

mmol) at room temperature. The resulting mixture was stirred for 5 minutes, then cooled to 0 °C, and MeI (0.05 mL, 0.77 mmol) was added. The reaction was allowed to slowly warm to room temperature overnight and then was quenched with saturated aqueous NH<sub>4</sub>Cl. The organic phase was collected and the aqueous phase was extracted with EtOAc. The organic phases were combined, dried over MgSO<sub>4</sub>, and concentrated in vacuo. The crude product was purified by column chromatography (5% EtOAc in hexanes) to afford **11b** as a white solid (79 mg, 45% yield): <sup>1</sup>H NMR (400 MHz, CDCl<sub>3</sub>) δ 8.36 (dd, *J* = 8.4, 1.1 Hz, 1H), 8.20 – 8.13 (m, 2H), 8.04 (s, 1H), 7.89 (d, *J* = 8.3 Hz, 1H), 7.69 (ddd, *J* = 8.2, 6.8, 1.2 Hz, 1H), 7.60 (ddd, *J* = 8.2, 6.8, 1.3 Hz, 1H), 7.51 (td, *J* = 7.3, 6.5, 1.2 Hz, 2H), 7.45 – 7.37 (m, 1H), 5.14 (s, 2H), 3.51 (s, 3H); <sup>13</sup>C NMR (100 MHz, CDCl<sub>3</sub>) δ 157.1, 149.9, 139.7, 137.5, 130.4, 128.9, 128.6, 127.7, 127.3, 127.1, 126.5, 125.9, 117.1, 75.8, 58.7; IR (Neat Film, NaCl) 3058, 2918, 2817, 1622, 1590, 1500, 1455, 1338, 1188, 1104, 885, 770, 752, 695, 668 cm<sup>-1</sup>; HRMS (MM:ESI-APCI+) *m/z* calc'd for C<sub>17</sub>H<sub>16</sub>NO [M+H]<sup>+</sup>: 250.1226, found 250.1236.

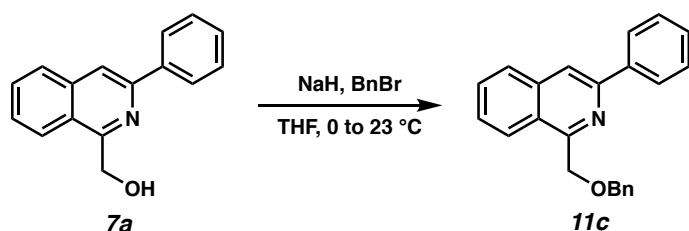

**1-((benzyloxy)methyl)-3-phenylisoquinoline (11c):** This procedure has been adapted from a previous report.<sup>6</sup> To a flame-dried RBF equipped with a stir bar was added NaH (36.4 mg, 60% w/w in oil, 0.91 mmol) and THF (7 mL, 0.1 M). To this suspension, isoquinoline **7a** (165 mg, 0.70 mmol) was added. After 5 minutes of stirring at room temperature, the reaction mixture was cooled to 0 °C and BnBr (0.91 mL, 0.91 mmol) was added. The reaction was allowed to slowly warm to room temperature overnight. Silica (1 g) was then added and the solvent was evaporated under vacuum. The crude product was purified by column chromatography (5% EtOAc in hexanes) to afford **11c** as a colorless viscous oil (153 mg, 67% yield): <sup>1</sup>H NMR (400 MHz, CDCl<sub>3</sub>) δ 8.39 (dd, *J* = 8.4, 1.1 Hz, 1H), 8.21 – 8.14 (m, 2H), 8.04 (s, 1H), 7.89 (d, *J* = 8.3 Hz, 1H), 7.69 (ddd, *J* = 8.2, 6.8, 1.2 Hz, 1H), 7.58 (ddd, *J* = 8.3, 6.8, 1.2 Hz, 1H), 7.51 (dd, *J* = 8.4, 6.9 Hz, 2H), 7.45 – 7.27 (m, 6H), 5.24 (s, 2H), 4.67 (s, 2H); <sup>13</sup>C NMR (100 MHz, CDCl<sub>3</sub>) δ 157.2, 149.9, 139.7, 138.2, 137.6, 130.4, 128.9, 128.6, 128.5, 128.3, 127.9, 127.7, 127.3, 127.1, 126.6, 126.1, 117.1, 73.6, 72.8; IR (Neat Film, NaCl) 3062, 2858, 1622, 1574, 1496, 1454, 1384, 1337, 1207, 1094, 1030, 885, 796, 768, 737, 696 cm<sup>-1</sup>; HRMS (MM:ESI-APCI+) *m/z* calc'd for C<sub>23</sub>H<sub>20</sub>NO [M+H]<sup>+</sup>: 326.1539, found 326.1544.

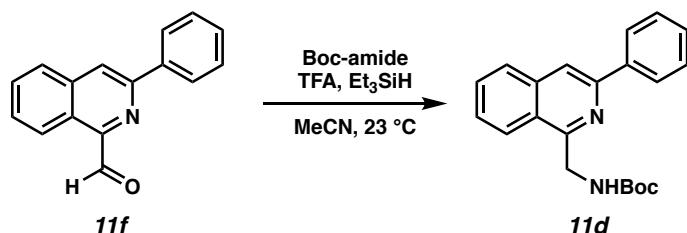

**tert-butyl ((3-phenylisoquinolin-1-yl)methyl)carbamate (11d):** This procedure has been adapted from a previous report.<sup>7</sup> To a solution of aldehyde **11f** (150 mg, 0.64 mmol) and *t*-butyl carbamate (150 mg, 1.28 mmol) in MeCN (6.5 mL, 0.1 M) were added trifluoroacetic acid (0.15 mL, 1.92 mmol) and triethylsilane (1.0 mL, 6.4 mmol). The reaction was stirred at room temperature overnight and then quenched with saturated aqueous Na<sub>2</sub>CO<sub>3</sub> and extracted with EtOAc. The combined organic phases were washed with brine, dried over Na<sub>2</sub>SO<sub>4</sub> and concentrated in vacuo. The crude product was purified by column chromatography (15% EtOAc in hexanes) to afford **11d** as a white solid (160 mg, 75% yield): <sup>1</sup>H NMR (400 MHz, CDCl<sub>3</sub>) δ 8.16 (d, *J* = 7.7 Hz, 2H), 8.10 (d, *J* = 8.4 Hz, 1H), 8.00 (s, 1H), 7.90 (d, *J* = 8.2 Hz, 1H), 7.70 (ddd, *J* = 8.1, 6.9, 1.1 Hz, 1H), 7.61 (ddd, *J* = 8.2, 6.9, 1.2 Hz, 1H), 7.53 (t, *J* = 7.6 Hz, 2H), 7.48 – 7.40 (m, 1H), 6.43 (br s, 1H), 5.03 (d, *J* = 4.4 Hz, 2H), 1.54 (s, 9H); <sup>13</sup>C NMR (100 MHz, CDCl<sub>3</sub>) δ 156.3, 155.0, 149.3, 139.4, 137.1, 130.6, 128.9, 128.8, 127.9, 127.6, 127.0, 125.1, 124.0, 116.3, 79.6, 43.5, 28.7; IR (Neat Film, NaCl) 3418, 2976, 1713, 1622, 1574, 1487, 1367, 1251, 1167, 1056, 882, 765, 695 cm<sup>-1</sup>; HRMS (MM:ESI-APCI+) *m/z* calc'd for C<sub>21</sub>H<sub>23</sub>N<sub>2</sub>O<sub>2</sub> [M+H]<sup>+</sup>: 335.1754, found 335.1760.

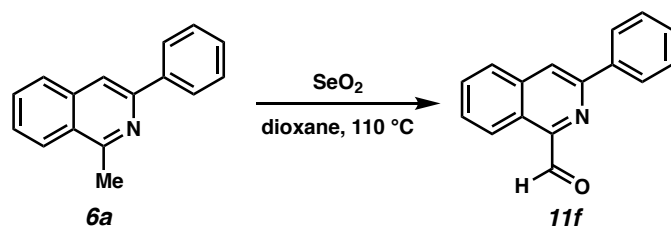

**3-phenylisoquinoline-1-carbaldehyde (11f):** To a Schlenk flask containing a stir bar was added SeO<sub>2</sub> (140 mg, 1.26 mmol) and isoquinoline **6a** (138 mg, 0.63 mmol) in 1,4-dioxane (13 mL, 0.05 M). The reaction vial was then sealed and heated to 110 °C while stirring for 2 hours. The reaction was then cooled to room temperature and filtered through celite rinsing with EtOAc. The crude product was then purified by column chromatography (5% EtOAc in hexanes) to afford **11f** as a pale yellow solid (1.32 g, 96% yield): <sup>1</sup>H NMR (400 MHz, CDCl<sub>3</sub>) δ 10.50 (s, 1H), 9.32 (d, *J* = 8.2 Hz, 1H), 8.31 (s, 1H), 8.24 (d, *J* = 8.1 Hz, 2H), 7.97 (d, *J* = 7.3 Hz, 1H), 7.84 – 7.67 (m, 2H), 7.56 (t, *J* = 7.5 Hz, 2H), 7.47 (t, *J* = 7.4 Hz, 1H); <sup>13</sup>C NMR (100 MHz, CDCl<sub>3</sub>) δ 196.2, 150.8, 149.7, 138.5, 138.1, 131.0, 129.9, 129.3, 129.1, 127.5, 127.1, 125.9, 125.5, 121.3; IR (Neat Film, NaCl) 2826, 2364, 1704, 1574, 1455, 1333, 1054, 904, 783, 764, 748, 719, 678 cm<sup>-1</sup>; HRMS (MM:ESI-APCI+) *m/z* calc'd for C<sub>16</sub>H<sub>12</sub>NO [M+H]<sup>+</sup>: 234.0913, found 234.0914.

**General Procedure 5: Hydrogenation Reactions**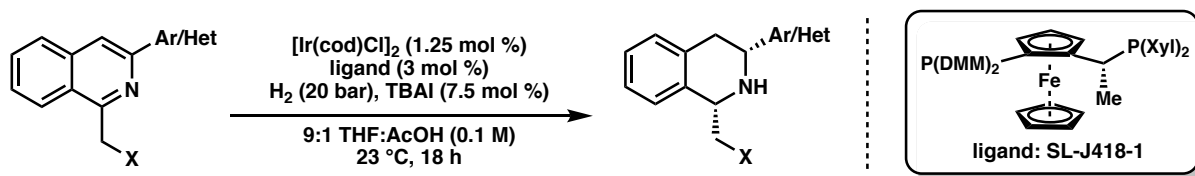

To an oven-dried 20-mL scintillation vial equipped with a stir bar and isoquinoline (0.2 mmol) was capped with a PTFE-lined septum and pierced with two 21 gauge green needles. The vials were then placed in a Parr bomb and brought into the glovebox, with the exception of the pressure gauge. A layer of plastic wrap and a rubber band were also brought in to seal the top of the bomb. In a nitrogen-filled glovebox, a solution of the ligand (SL-J418-1) (4.53 mg, 0.006 mmol per reaction) and [Ir(cod)Cl]<sub>2</sub> (1.68 mg, 0.0025 mmol per reaction) in THF (1.8 mL per reaction) was prepared and allowed to stand for 10 minutes. Meanwhile, a solution of TBAI (5.54 mg, 0.015 mmol per reaction) in AcOH (0.2 mL per reaction) was prepared in a 1-dram vial, and 0.2 mL of the solution was added to each reaction vial via a syringe. Afterwards, 1.8 mL of the homogeneous iridium catalyst solution was added to each reaction vial via a syringe. After re-capping the vials with caps equipped with needles, the reactions were placed in the bomb and the top was covered tightly with plastic wrap secured by a rubber band. The bomb was then removed from the glovebox, and the pressure gauge was quickly screwed in place and tightened. The bomb was charged to 5-10 bar H<sub>2</sub> and slowly released. This process was repeated two more times, before charging the bomb to 20 bar of H<sub>2</sub> (or 60 bar H<sub>2</sub>). The bomb was then left stirring at 200 rpm at room temperature (or placed in an oil bath and heated to 60 °C) for 18 hours. Then, the bomb was removed from the stir plate and the hydrogen pressure was vented. The reaction vials were removed from the bomb and each solution was basified by the addition of saturated aqueous K<sub>2</sub>CO<sub>3</sub>. The layers were separated, and the aqueous layer was extracted with EtOAc. The combined organics layers were then dried over Na<sub>2</sub>SO<sub>4</sub>, and concentrated in vacuo. The product was then purified by column chromatography to furnish the product as an inseparable mixture of diastereomers.

*Please note* that the NMR data listed is for the major diastereomer, and that the provided spectra for the following compounds reflect the inseparable mixture of *cis*- and *trans*-products. The enantiomeric excess was determined by chiral SFC analysis of the Cbz-protected amine (see Table S3). The absolute configuration was determined for compound **8p** via x-ray crystallographic analysis. Absolute configuration of compound **12e** were determined using vibrational circular dichroism (VCD), *vide infra*. The absolute configuration for all other products has been inferred by analogy.

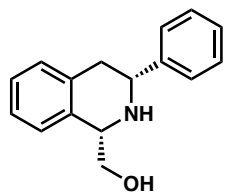**8a**

**((1S,3R)-3-phenyl-1,2,3,4-tetrahydroisoquinolin-1-yl)methanol (8a):** Compound **8a** was prepared from isoquinoline **7a** using general procedure 5 and purified by column chromatography (5% MeOH in CH<sub>2</sub>Cl<sub>2</sub>) to provide a tan solid as a mixture of diastereomers (47 mg, 98% yield) (dr = 15.7:1); 92% ee for major diastereomer;  $[\alpha]_{\text{D}}^{25} +110.2$  (*c* 1.02, CHCl<sub>3</sub>); *Cis*-diastereomer: <sup>1</sup>H NMR (400 MHz, CDCl<sub>3</sub>) δ 7.50 – 7.43 (m, 2H), 7.41 – 7.34 (m, 2H), 7.34 – 7.28 (m, 1H), 7.25 – 7.17 (m, 3H), 7.15 – 7.10 (m, 1H), 4.43 – 4.41 (m, 1H), 4.10 (dd, *J* = 11.1, 3.5 Hz, 1H), 4.02 (dd, *J* = 10.8, 3.3 Hz, 1H), 3.90 (dd, *J* = 10.9, 5.4 Hz, 1H), 3.02 (ddt, *J* = 15.9, 11.1, 1.4 Hz, 1H), 2.90 (dd, *J* = 15.7, 3.5 Hz, 1H); <sup>13</sup>C NMR (100 MHz, CDCl<sub>3</sub>) δ 144.3, 136.7, 134.9, 129.3, 128.8, 127.7, 126.8, 126.7, 126.5, 125.5, 66.7, 58.7, 57.7, 39.0; IR (Neat Film, NaCl) 3296, 3060, 2910, 2360, 1494, 1455, 1314, 1116, 1036, 909, 742, 700 cm<sup>-1</sup>; HRMS (MM:ESI-APCI+) *m/z* calc'd for C<sub>16</sub>H<sub>18</sub>NO [M+H]<sup>+</sup>: 240.1383, found 240.1385; SFC Conditions: 45% IPA, 3.5 mL/min, Chiralpak AD-H column, λ = 210 nm, *t<sub>R</sub>* (min): major = 2.34, minor = 4.02.

*Trans*-diastereomer: <sup>1</sup>H NMR (400 MHz, CDCl<sub>3</sub>) δ 7.49 – 7.43 (m, 2H), 7.42 – 7.38 (m, 2H), 7.36 – 7.27 (m, 1H), 7.26 – 7.10 (m, 4H), 4.23 (dd, *J* = 10.5, 4.8 Hz, 1H), 4.16 (dd, *J* = 11.2, 3.9 Hz, 1H), 3.80 (dd, *J* = 10.8, 4.8 Hz, 1H), 3.71 (t, *J* = 10.7 Hz, 1H), 3.07 (dd, *J* = 16.4, 3.9 Hz, 1H), 2.95 (dd, *J* = 15.9, 11.2 Hz, 1H); <sup>13</sup>C NMR (100 MHz, CDCl<sub>3</sub>) δ 143.5, 135.5, 134.7, 129.5, 128.8, 127.5, 127.0, 126.7, 126.6, 126.4, 63.8, 57.4, 50.7, 36.8.

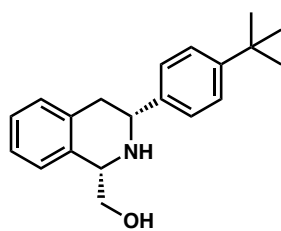**8b**

**((1S,3R)-3-(4-(*tert*-butyl)phenyl)-1,2,3,4-tetrahydroisoquinolin-1-yl)methanol (8b):** Compound **8b** was prepared from isoquinoline **7b** using general procedure 5 and purified by column chromatography (50% EtOAc in hexanes) to provide a tan solid as a mixture of diastereomers (51 mg, 87% yield) (dr = 13.3:1); 91% ee for major diastereomer;  $[\alpha]_{\text{D}}^{25} +78.8$  (*c* 1.03, CHCl<sub>3</sub>); Major diastereomer: <sup>1</sup>H NMR (400 MHz, CDCl<sub>3</sub>) δ 7.42 – 7.38 (m, 4H), 7.26 – 7.21 (m, 2H), 7.21 – 7.17 (m, 1H), 7.12 (d, *J* = 7.7 Hz, 1H), 4.42 – 4.40 (m, 1H), 4.08 (dd, *J* = 11.2, 3.4 Hz, 1H), 4.01 (dd, *J* = 10.8, 3.3 Hz, 1H), 3.89 (dd, *J* = 10.8, 5.4 Hz, 1H), 3.03 (dd, *J* = 15.8, 11.2 Hz, 1H), 2.89 (dd, *J* = 15.7, 3.4 Hz, 1H), 1.34 (s, 9H); <sup>13</sup>C NMR (100 MHz, CDCl<sub>3</sub>) δ



150.7, 141.2, 136.7, 135.0, 129.3, 126.7, 126.5, 126.5, 125.7, 125.5, 66.6, 58.7, 57.3, 38.8, 34.7, 31.5; IR (Neat Film, NaCl) 3318, 2961, 2868, 1494, 1454, 1362, 1312, 1270, 1116, 1038, 820, 743  $\text{cm}^{-1}$ ; HRMS (MM:ESI-APCI+)  $m/z$  calc'd for  $\text{C}_{20}\text{H}_{26}\text{NO}$   $[\text{M}+\text{H}]^+$ : 296.2009, found 296.2005; SFC Conditions: 45% IPA, 3.5 mL/min, Chiralpak AD-H column,  $\lambda = 210$  nm,  $t_{\text{R}}$  (min): major = 1.81, minor = 2.73.

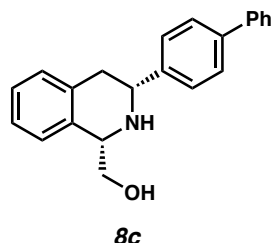

**((1S,3R)-3-([1,1'-biphenyl]-4-yl)-1,2,3,4-tetrahydroisoquinolin-1-yl)methanol (8c):**

Compound **8c** was prepared from isoquinoline **7c** using general procedure 5 and purified by column chromatography (50% EtOAc in hexanes) to provide a tan solid as a mixture of diastereomers (50 mg, 79% yield) (dr = 9.0:1); 92% ee for major diastereomer;  $[\alpha]_{\text{D}}^{25} +73.2$  ( $c$  1.03,  $\text{CHCl}_3$ ); Major diastereomer:  $^1\text{H}$  NMR (400 MHz,  $\text{CDCl}_3$ )  $\delta$  7.65 – 7.58 (m, 4H), 7.55 – 7.53 (m, 2H), 7.47 – 7.44 (m, 2H), 7.39 – 7.32 (m, 1H), 7.28 – 7.16 (m, 3H), 7.15 (d,  $J = 6.2$  Hz, 1H), 4.46 – 4.44 (m, 1H), 4.15 (dd,  $J = 11.2, 3.4$  Hz, 1H), 4.04 (dd,  $J = 10.9, 3.3$  Hz, 1H), 3.91 (dd,  $J = 10.9, 5.5$  Hz, 1H), 3.12 – 3.00 (m, 1H), 2.94 (dd,  $J = 15.6, 3.4$  Hz, 1H);  $^{13}\text{C}$  NMR (100 MHz,  $\text{CDCl}_3$ )  $\delta$  143.2, 141.0, 140.7, 136.5, 134.9, 129.3, 128.9, 127.5, 127.4, 127.3, 127.2, 126.8, 126.6, 125.5, 66.6, 58.7, 57.4, 38.9; IR (Neat Film, NaCl) 3318, 3029, 2924, 2365, 1487, 1455, 1312, 1218, 1112, 1038, 833, 763, 748, 699  $\text{cm}^{-1}$ ; HRMS (MM:ESI-APCI+)  $m/z$  calc'd for  $\text{C}_{22}\text{H}_{22}\text{NO}$   $[\text{M}+\text{H}]^+$ : 316.1696, found 316.1686; SFC Conditions: 45% IPA, 3.5 mL/min, Chiralpak AD-H column,  $\lambda = 210$  nm,  $t_{\text{R}}$  (min): major = 4.08, minor = 5.18.

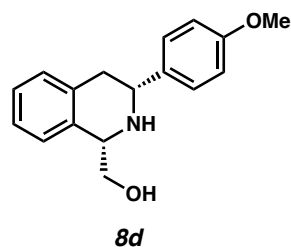

**((1S,3R)-3-(4-methoxyphenyl)-1,2,3,4-tetrahydroisoquinolin-1-yl)methanol (8d):** Compound **8d** was prepared from isoquinoline **7d** using general procedure 5 and purified by column chromatography (50% to 60% EtOAc in hexanes + 1%  $\text{NEt}_3$ ) to provide a pale yellow solid as a mixture of diastereomers (40 mg, 75% yield) (dr = 13.3:1); 92% ee for major diastereomer;  $[\alpha]_{\text{D}}^{25} +69.3$  ( $c$  1.01,  $\text{CHCl}_3$ ); Major diastereomer:  $^1\text{H}$  NMR (400 MHz,  $\text{CDCl}_3$ )  $\delta$  7.39 – 7.36 (m, 2H), 7.24 – 7.15 (m, 3H), 7.12 (d,  $J = 7.6$  Hz, 1H), 6.94 – 6.90 (m, 2H), 4.41 – 4.39 (m, 1H), 4.07 – 3.97 (m, 2H), 3.86 (dd,  $J = 10.9, 5.9$  Hz, 1H), 3.83 (s, 3H), 3.06 – 2.95 (m, 1H), 2.86 (dd,  $J = 15.7, 3.4$  Hz, 1H);  $^{13}\text{C}$  NMR (100 MHz,  $\text{CDCl}_3$ )  $\delta$  159.0, 136.6, 136.3, 134.8, 129.2, 127.8,

126.6, 126.3, 125.3, 114.0, 66.5, 58.6, 57.0, 55.4, 38.8; IR (Neat Film, NaCl) 3342, 2929, 2835, 1612, 1514, 1494, 1453, 1302, 1250, 1176, 1108, 1036, 824, 801, 743  $\text{cm}^{-1}$ ; HRMS (MM:ESI-APCI+)  $m/z$  calc'd for  $\text{C}_{17}\text{H}_{20}\text{NO}_2$   $[\text{M}+\text{H}]^+$ : 270.1489, found 270.1486; SFC Conditions: 45% IPA, 2.5 mL/min, Chiralpak AD-H column,  $\lambda = 210$  nm,  $t_{\text{R}}$  (min): major = 2.59, minor = 3.61.

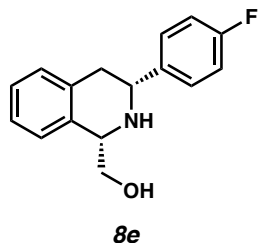

**((1S,3R)-3-(4-fluorophenyl)-1,2,3,4-tetrahydroisoquinolin-1-yl)methanol (8e):** Compound **8e** was prepared from isoquinoline **7e** using general procedure 5 and purified by column chromatography (40% EtOAc in hexanes + 1%  $\text{NEt}_3$ ) to provide a pale yellow solid as a mixture of diastereomers (51 mg, 99% yield) (dr = 10.1:1); 93% ee for major diastereomer;  $[\alpha]_{\text{D}}^{25} +79.2$  ( $c$  1.00,  $\text{CHCl}_3$ ); Major diastereomer:  $^1\text{H}$  NMR (400 MHz,  $\text{CDCl}_3$ )  $\delta$  7.45 – 7.41 (m, 2H), 7.24 – 7.18 (m, 3H), 7.12 (d,  $J = 6.9$  Hz, 1H), 7.08 – 7.04 (m, 2H), 4.42 – 4.40 (m, 1H), 4.08 (dd,  $J = 11.0, 3.5$  Hz, 1H), 4.02 (dd,  $J = 10.8, 3.3$  Hz, 1H), 3.88 (dd,  $J = 10.9, 5.5$  Hz, 1H), 3.03 – 2.91 (m, 1H), 2.87 (dd,  $J = 15.7, 3.5$  Hz, 1H);  $^{13}\text{C}$  NMR (100 MHz,  $\text{CDCl}_3$ )  $\delta$  162.3 (d,  $J = 245.5$  Hz), 140.0 (d,  $J = 3.0$  Hz), 136.4, 134.8, 129.3, 128.4 (d,  $J = 7.9$  Hz), 126.8, 126.6, 125.5, 115.5 (d,  $J = 21.2$  Hz), 66.7, 58.6, 57.1, 39.1;  $^{19}\text{F}$  NMR (282 MHz,  $\text{CDCl}_3$ )  $\delta$  –115.0 – –115.1 (m); IR (Neat Film, NaCl) 3310, 3069, 2924, 2828, 1605, 1511, 1494, 1454, 1225, 1158, 1063, 1040, 844, 826, 744  $\text{cm}^{-1}$ ; HRMS (MM:ESI-APCI+)  $m/z$  calc'd for  $\text{C}_{16}\text{H}_{17}\text{FNO}$   $[\text{M}+\text{H}]^+$ : 258.1289, found 258.1286; SFC Conditions: 45% IPA, 2.5 mL/min, Chiralpak AD-H column,  $\lambda = 210$  nm,  $t_{\text{R}}$  (min): major = 1.93, minor = 2.87.

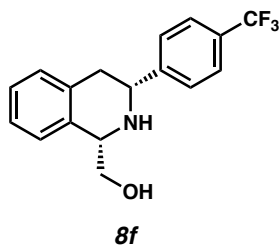

**((1S,3R)-3-(4-(trifluoromethyl)phenyl)-1,2,3,4-tetrahydroisoquinolin-1-yl)methanol (8f):** Compound **8f** was prepared from isoquinoline **7f** using general procedure 5 and purified by column chromatography (30% EtOAc in hexanes + 1%  $\text{NEt}_3$ ) to provide a yellow solid as a mixture of diastereomers (49 mg, 80% yield) (dr = 4.6:1); 92% ee for major diastereomer;  $[\alpha]_{\text{D}}^{25} +35.5$  ( $c$  1.01,  $\text{CHCl}_3$ ); Major diastereomer:  $^1\text{H}$  NMR (400 MHz,  $\text{CDCl}_3$ )  $\delta$  7.57 – 7.55 (m, 2H, integration overlapped with minor diastereomer), 7.51 (d,  $J = 8.3$  Hz, 2H), 7.18 – 7.10 (m, 3H), 7.10 – 7.03 (m, 1H), 4.36 – 4.34 (m, 1H), 4.08 (dd,  $J = 10.6, 4.0$  Hz, 1H), 3.97 (dd,  $J = 10.8, 3.3$  Hz, 1H), 3.81 (dd,  $J = 10.9, 5.8$  Hz, 1H), 2.95 – 2.78 (m, 2H);  $^{13}\text{C}$  NMR (100 MHz,  $\text{CDCl}_3$ )  $\delta$

148.3, 136.0, 134.7, 129.9 (q,  $J = 32.3$  Hz), 129.3, 127.2, 126.9, 126.7, 125.7 (q,  $J = 3.8$  Hz), 125.5, 124.3 (q,  $J = 272.2$  Hz), 66.6, 58.4, 57.3, 38.8;  $^{19}\text{F}$  NMR (282 MHz,  $\text{CDCl}_3$ )  $\delta$  -115.1 (qd,  $J = 8.7, 5.6$  Hz); IR (Neat Film, NaCl) 3304, 2917, 1621, 1418, 1325, 1166, 1123, 1068, 1018, 844, 745  $\text{cm}^{-1}$ ; HRMS (MM:ESI-APCI+)  $m/z$  calc'd for  $\text{C}_{17}\text{H}_{17}\text{F}_3\text{NO}$   $[\text{M}+\text{H}]^+$ : 308.1257, found 308.1265; SFC Conditions: 25% IPA, 2.5 mL/min, Chiralpak AD-H column,  $\lambda = 210$  nm,  $t_{\text{R}}$  (min): major = 3.11 minor = 5.54.

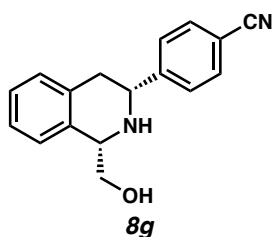

**4-((1S,3R)-1-(hydroxymethyl)-1,2,3,4-tetrahydroisoquinolin-3-yl)benzonitrile (8g):**

Compound **8g** was prepared from isoquinoline **7g** using general procedure 5 and purified by column chromatography (30% EtOAc in  $\text{CH}_2\text{Cl}_2$  + 1%  $\text{NEt}_3$ ) to provide a pale tan solid as a mixture of diastereomers (44 mg, 83% yield) (dr = 2.4:1); 82% ee for major diastereomer;  $[\alpha]_{\text{D}}^{25} +57.4$  ( $c$  1.00,  $\text{CHCl}_3$ ); Major diastereomer:  $^1\text{H}$  NMR (400 MHz,  $\text{CDCl}_3$ )  $\delta$  7.69 – 7.66 (m, 2H), 7.60 – 7.57 (m, 2H), 7.26 – 7.17 (m, 3H, integration overlapped with minor diastereomer), 7.16 – 7.12 (m, 1H), 4.43 – 4.41 (m, 1H), 4.16 (dd,  $J = 10.0, 4.6$  Hz, 1H), 4.06 (dd,  $J = 10.9, 3.3$  Hz, 1H), 3.89 (dd,  $J = 10.9, 5.8$  Hz, 1H), 2.99 – 2.84 (m, 2H);  $^{13}\text{C}$  NMR (100 MHz,  $\text{CDCl}_3$ )  $\delta$  149.6, 135.7, 134.5, 132.6, 129.2, 127.6, 126.9, 126.8, 125.5, 118.9, 111.5, 66.7, 58.5, 57.4, 38.8; IR (Neat Film, NaCl) 3314, 3060, 2925, 2227, 1608, 1494, 1454, 1311, 1115, 1040, 910, 846, 826, 780, 740  $\text{cm}^{-1}$ ; HRMS (MM:ESI-APCI+)  $m/z$  calc'd for  $\text{C}_{17}\text{H}_{17}\text{N}_2\text{O}$   $[\text{M}+\text{H}]^+$ : 265.1335, found 265.1336; SFC Conditions: 45% IPA, 3.5 mL/min, Chiralpak AD-H column,  $\lambda = 210$  nm,  $t_{\text{R}}$  (min): major = 2.03, minor = 3.33.

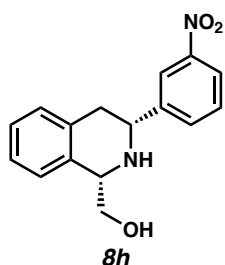

**((1S,3R)-3-(3-nitrophenyl)-1,2,3,4-tetrahydroisoquinolin-1-yl)methanol (8h):** Compound **8h** was prepared from isoquinoline **7h** using general procedure 5 and purified by column chromatography (0% to 2% MeOH in  $\text{CH}_2\text{Cl}_2$ ) to provide a pale yellow solid as a mixture of diastereomers (44 mg, 78% yield) (dr = 3.2:1); 86% ee for major diastereomer;  $[\alpha]_{\text{D}}^{25} +54.4$  ( $c$  1.02,  $\text{CHCl}_3$ ); Major diastereomer:  $^1\text{H}$  NMR (400 MHz,  $\text{CDCl}_3$ )  $\delta$  8.34 (s, 1H), 8.15 (d,  $J = 8.2$  Hz, 1H), 7.81 (d,  $J = 8.1$  Hz, 1H), 7.62 – 7.47 (m, 1H), 7.25 – 7.07 (m, 4H, integration overlapped with minor diastereomer), 4.43 – 4.41 (m, 1H), 4.20 (dd,  $J = 9.2, 5.4$  Hz, 1H), 4.07

(dd,  $J = 10.9, 3.2$  Hz, 1H), 3.91 – 3.83 (m, 1H), 3.15 – 3.02 (m, 1H), 2.98 – 2.91 (m, 2H);  $^{13}\text{C}$  NMR (100 MHz,  $\text{CDCl}_3$ )  $\delta$  148.7, 146.5, 135.7, 134.6, 133.2, 129.8, 129.4, 127.0, 126.9, 125.6, 122.9, 122.0, 66.8, 58.7, 57.2, 38.9; IR (Neat Film, NaCl) 3388, 2924, 1635, 1531, 1495, 1454, 1350, 1220, 1117, 1038, 802, 781, 748, 738, 682  $\text{cm}^{-1}$ ; HRMS (MM:ESI-APCI+)  $m/z$  calc'd for  $\text{C}_{16}\text{H}_{17}\text{N}_2\text{O}_3$   $[\text{M}+\text{H}]^+$ : 285.1234, found 285.1234; SFC Conditions: 45% IPA, 3.5 mL/min, Chiralpak AD-H column,  $\lambda = 210$  nm,  $t_{\text{R}}$  (min): major = 2.45, minor = 3.23.

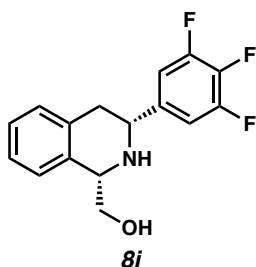

**((1*S*,3*R*)-3-(3,4,5-trifluorophenyl)-1,2,3,4-tetrahydroisoquinolin-1-yl)methanol (**8i**):**

Compound **8i** was prepared from isoquinoline **7i** using general procedure 5 and purified by column chromatography (5% to 10% EtOAc in  $\text{CH}_2\text{Cl}_2$  + 1%  $\text{NEt}_3$ ) to provide a pale yellow solid as a mixture of diastereomers (55 mg, 94% yield) (dr = 3.5:1); 89% ee for major diastereomer;  $[\alpha]_{\text{D}}^{25} +61.6$  ( $c$  1.02,  $\text{CHCl}_3$ ); Major diastereomer:  $^1\text{H}$  NMR (400 MHz,  $\text{CDCl}_3$ )  $\delta$  7.25 – 7.18 (m, 2H, integration overlapped with minor diastereomer), 7.16 – 7.08 (m, 4H), 4.40 – 4.38 (m, 1H), 4.09 – 4.00 (m, 2H), 3.87 (dd,  $J = 10.9, 5.9$  Hz, 1H), 2.88 (d,  $J = 8.4$  Hz, 2H);  $^{13}\text{C}$  NMR (100 MHz,  $\text{CDCl}_3$ ), complicated spectrum due to mixture of diastereomers and C–F coupling, multiplicities listed to the best of our ability  $\delta$  151.4 (ddd,  $J = 250.1, 9.8, 3.6$  Hz), 139.0 (dt,  $J = 251.0, 15.5$  Hz), 135.5, 134.4, 129.4, 129.2, 126.9, 126.8, 125.5, 110.9 – 110.6 (m), 66.7, 58.5, 56.2, 38.8;  $^{19}\text{F}$  NMR (282 MHz,  $\text{CDCl}_3$ )  $\delta$  –133.6 – –134.4 (m), –161.8 – –162.0 (m); IR (Neat Film, NaCl) 3307, 2928, 1621, 1532, 1454, 1372, 1340, 1235, 1043, 866, 804, 748, 698  $\text{cm}^{-1}$ ; HRMS (MM:ESI-APCI+)  $m/z$  calc'd for  $\text{C}_{16}\text{H}_{15}\text{F}_3\text{NO}$   $[\text{M}+\text{H}]^+$ : 294.1100, found 294.1095; SFC Conditions: 40% IPA, 2.5 mL/min, Chiralpak AD-H column,  $\lambda = 210$  nm,  $t_{\text{R}}$  (min): major = 1.67, minor = 2.20.

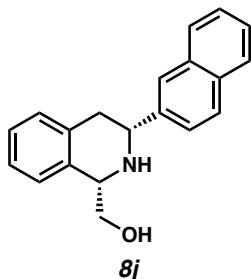

**((1*S*,3*R*)-3-(naphthalen-2-yl)-1,2,3,4-tetrahydroisoquinolin-1-yl)methanol (**8j**):** Compound **8j** was prepared from isoquinoline **7j** using general procedure 5 and purified by column chromatography (30% EtOAc in hexanes + 1%  $\text{NEt}_3$ ) to provide a pale yellow solid as a single diastereomer (49 mg, 80% yield); 95% ee;  $[\alpha]_{\text{D}}^{25} +90.7$  ( $c$  1.00,  $\text{CHCl}_3$ );  $^1\text{H}$  NMR (400 MHz,

CDCl<sub>3</sub>)  $\delta$  7.90 (s, 1H), 7.88 – 7.84 (m, 3H), 7.60 (dd,  $J$  = 8.5, 1.8 Hz, 1H), 7.53 – 7.45 (m, 2H), 7.28 – 7.20 (m, 3H), 7.15 (d,  $J$  = 6.8 Hz, 1H), 4.48 – 4.46 (m, 1H), 4.27 (dd,  $J$  = 11.1, 3.5 Hz, 1H), 4.06 (dd,  $J$  = 10.9, 3.3 Hz, 1H), 3.94 (dd,  $J$  = 10.8, 5.4 Hz, 1H), 3.14 – 3.07 (m, 1H), 2.98 (dd,  $J$  = 15.7, 3.5 Hz, 1H); <sup>13</sup>C NMR (100 MHz, CDCl<sub>3</sub>)  $\delta$  141.8, 136.7, 135.1, 133.7, 133.2, 129.4, 128.6, 128.1, 127.9, 126.9, 126.7, 126.4, 126.1, 125.6, 125.3, 66.8, 58.8, 57.9, 39.1; IR (Neat Film, NaCl) 3056, 2917, 2356, 1602, 1494, 1454, 1425, 1366, 1314, 1276, 1112, 1047, 862, 820, 743 cm<sup>-1</sup>; HRMS (MM:ESI-APCI+)  $m/z$  calc'd for C<sub>20</sub>H<sub>20</sub>NO [M+H]<sup>+</sup>: 290.1539, found 290.1540; SFC Conditions: 45% IPA, 3.5 mL/min, Chiralpak AD-H column,  $\lambda$  = 210 nm,  $t_R$  (min): major = 3.61, minor = 5.81.

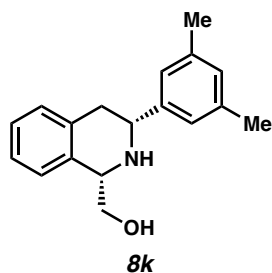

**((1S,3R)-3-(3,5-dimethylphenyl)-1,2,3,4-tetrahydroisoquinolin-1-yl)methanol (8k):**

Compound **8k** was prepared from isoquinoline **7k** using general procedure 5 and purified by column chromatography (30% EtOAc in hexanes + 1% NEt<sub>3</sub>) to provide a pale yellow solid as a single diastereomer (49 mg, 80% yield); 92% ee;  $[\alpha]_D^{25}$  +93.5 ( $c$  0.98, CHCl<sub>3</sub>); <sup>1</sup>H NMR (400 MHz, CDCl<sub>3</sub>)  $\delta$  7.25 – 7.16 (m, 3H), 7.12 (d,  $J$  = 6.5 Hz, 1H), 7.07 (s, 2H), 6.95 (s, 1H), 4.41 – 4.39 (m, 1H), 4.02 (dd,  $J$  = 10.9, 3.3 Hz, 2H), 3.90 (dd,  $J$  = 10.8, 5.4 Hz, 1H), 3.04 – 3.00 (m, 1H), 2.88 (dd,  $J$  = 15.8, 3.4 Hz, 1H), 2.34 (s, 6H); <sup>13</sup>C NMR (100 MHz, CDCl<sub>3</sub>)  $\delta$  144.2, 138.3, 136.8, 135.0, 129.3, 126.7, 126.4, 125.4, 124.6, 66.6, 58.7, 57.6, 38.9, 21.5; IR (Neat Film, NaCl) 3318, 3014, 2916, 1607, 1494, 1454, 1313, 1117, 1038, 854, 782, 746, 725 cm<sup>-1</sup>; HRMS (MM:ESI-APCI+)  $m/z$  calc'd for C<sub>18</sub>H<sub>22</sub>NO [M+H]<sup>+</sup>: 268.1696, found 268.1702; SFC Conditions: 45% IPA, 3.5 mL/min, Chiralpak AD-H column,  $\lambda$  = 210 nm,  $t_R$  (min): major = 1.95, minor = 3.02.

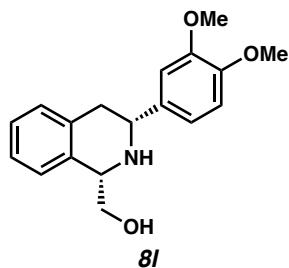

**((1S,3R)-3-(3,4-dimethoxyphenyl)-1,2,3,4-tetrahydroisoquinolin-1-yl)methanol (8l):**

Compound **8l** was prepared from isoquinoline **7l** using general procedure 5 and purified by column chromatography (1% MeOH in CH<sub>2</sub>Cl<sub>2</sub> + 1% NEt<sub>3</sub>) to provide a pale yellow solid as a single diastereomer (49 mg, 80% yield); 88% ee;  $[\alpha]_D^{25}$  +62.4 ( $c$  1.00, CHCl<sub>3</sub>); <sup>1</sup>H NMR (400

MHz, CDCl<sub>3</sub>)  $\delta$  7.22 – 7.16 (m, 3H), 7.12 (d,  $J$  = 6.7 Hz, 1H), 7.04 – 6.94 (m, 2H), 6.87 – 6.84 (m, 1H), 4.38 – 4.36 (m, 1H), 4.01 (dt,  $J$  = 11.2, 4.0 Hz, 2H), 3.90 (s, 3H), 3.88 (s, 3H), 3.84 (dd,  $J$  = 11.0, 6.0 Hz, 1H), 3.08 – 3.00 (m, 1H), 2.87 (dd,  $J$  = 15.8, 3.3 Hz, 1H); <sup>13</sup>C NMR (100 MHz, CDCl<sub>3</sub>)  $\delta$  149.2, 148.5, 136.5, 136.4, 134.6, 129.3, 126.7, 126.4, 125.3, 119.0, 111.2, 110.0, 66.3, 58.8, 57.6, 56.1, 38.7; IR (Neat Film, NaCl) 3332, 2934, 2832, 1593, 1518, 1494, 1454, 1264, 1238, 1141, 1028, 745, 720 cm<sup>-1</sup>; HRMS (MM:ESI-APCI+)  $m/z$  calc'd for C<sub>18</sub>H<sub>22</sub>NO<sub>3</sub> [M+H]<sup>+</sup>: 300.1594, found 300.1600; SFC Conditions: 45% IPA, 3.5 mL/min, Chiralpak AD-H column,  $\lambda$  = 210 nm,  $t_R$  (min): major = 2.28, minor = 2.93.

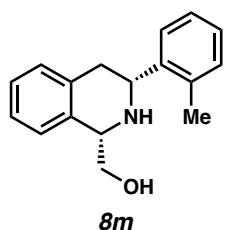

**((1S,3R)-3-(*o*-tolyl)-1,2,3,4-tetrahydroisoquinolin-1-yl)methanol (8m):** Compound **8m** was prepared from isoquinoline **7m** using general procedure 5 and purified by column chromatography (30% EtOAc in hexanes + 1% NEt<sub>3</sub>) to provide a pale beige solid as a mixture of diastereomers (49 mg, 80% yield) (dr = 10.1:1); 49% ee from major diastereomer;  $[\alpha]_D^{25}$  +53.7 ( $c$  1.01, CHCl<sub>3</sub>); <sup>1</sup>H NMR (400 MHz, CDCl<sub>3</sub>)  $\delta$  7.60 (d,  $J$  = 7.1 Hz, 1H), 7.29 – 7.26 (m, 1H), 7.26 – 7.17 (m, 5H), 7.14 (d,  $J$  = 7.3 Hz, 1H), 4.44 – 4.42 (m, 1H), 4.32 (dd,  $J$  = 10.9, 3.5 Hz, 1H), 4.04 (dd,  $J$  = 10.8, 3.2 Hz, 1H), 3.92 (dd,  $J$  = 10.8, 5.3 Hz, 1H), 3.03 – 2.92 (m, 1H), 2.88 (dd,  $J$  = 15.8, 3.5 Hz, 1H), 2.39 (s, 3H); <sup>13</sup>C NMR (100 MHz, CDCl<sub>3</sub>)  $\delta$  142.2, 136.9, 135.2, 135.0, 130.6, 129.4, 127.3, 126.7, 126.5, 125.6, 125.5, 66.6, 58.9, 53.4, 37.7, 19.5; IR (Neat Film, NaCl) 3318, 3022, 2925, 2354, 1492, 1454, 1316, 1117, 1037, 864, 751, 743, 727 cm<sup>-1</sup>; HRMS (MM:ESI-APCI+)  $m/z$  calc'd for C<sub>17</sub>H<sub>20</sub>NO [M+H]<sup>+</sup>: 254.1539, found 254.1539; SFC Conditions: 30% IPA, 2.5 mL/min, Chiralpak AD-H column,  $\lambda$  = 210 nm,  $t_R$  (min): major = 5.91, minor = 6.39.

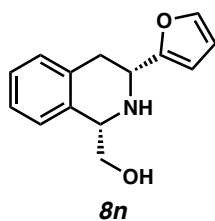

**((1S,3R)-3-(furan-2-yl)-1,2,3,4-tetrahydroisoquinolin-1-yl)methanol (8n):** Compound **8n** was prepared from isoquinoline **7n** using general procedure 5 and purified by column chromatography (40% EtOAc in hexanes + 1% NEt<sub>3</sub>) to provide a pale yellow solid as a mixture of diastereomers (34 mg, 74% yield) (dr = 3.3:1); 92% ee for major diastereomer;  $[\alpha]_D^{25}$  +35.5 ( $c$  1.00, CHCl<sub>3</sub>); Major diastereomer: <sup>1</sup>H NMR (400 MHz, CDCl<sub>3</sub>)  $\delta$  7.41 – 7.39 (m, 1H), 7.24 – 7.14 (m, 4H, integration overlapped with minor diastereomer), 6.37 (dd,  $J$  = 3.3, 1.9 Hz, 1H),

6.28 (d,  $J = 3.2$  Hz, 1H), 4.37 – 4.35 (m, 1H), 4.20 (dd,  $J = 11.0, 3.7$  Hz, 1H), 4.03 (dd,  $J = 11.0, 3.3$  Hz, 1H), 3.86 – 3.75 (m, 1H), 3.18 – 3.05 (m, 1H), 3.05 – 2.95 (m, 1H);  $^{13}\text{C}$  NMR (100 MHz,  $\text{CDCl}_3$ )  $\delta$  141.8, 135.5, 134.7, 129.4, 126.9, 126.7, 126.5, 125.3, 110.2, 105.3, 66.2, 57.9, 50.7, 34.5; IR (Neat Film, NaCl) 3304, 2920, 1495, 1454, 1316, 1146, 1114, 1062, 1037, 1009, 883, 740  $\text{cm}^{-1}$ ; HRMS (MM:ESI-APCI+)  $m/z$  calc'd for  $\text{C}_{14}\text{H}_{16}\text{NO}_2$   $[\text{M}+\text{H}]^+$ : 230.1176, found 230.1181; SFC Conditions: 35% IPA, 2.5 mL/min, Chiralpak OJ-H column,  $\lambda = 210$  nm,  $t_{\text{R}}$  (min): major = 1.52, minor = 1.82.

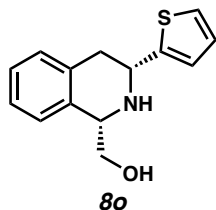

**((1S,3R)-3-(thiophen-2-yl)-1,2,3,4-tetrahydroisoquinolin-1-yl)methanol (8o):** Compound **8o** was prepared from isoquinoline **7o** using general procedure 5 and purified by column chromatography (40% EtOAc in hexanes + 1%  $\text{NEt}_3$ ) to provide a pale beige solid as a mixture of diastereomers (46 mg, 94% yield) (dr = 3.6:1); 90% ee for major diastereomer;  $[\alpha]_{\text{D}}^{25} +57.4$  ( $c$  1.04,  $\text{CHCl}_3$ ); Major diastereomer:  $^1\text{H}$  NMR (400 MHz,  $\text{CDCl}_3$ )  $\delta$  7.34 – 7.28 (m, 1H), 7.28 – 7.21 (m, 3H, integration overlapped with minor diastereomer), 7.19 – 7.15 (m, 1H), 7.11 – 7.09 (m, 1H), 7.07 – 7.04 (m, 1H), 4.47 – 4.42 (m, 2H), 4.06 (dd,  $J = 10.9, 3.4$  Hz, 1H), 3.87 (dd,  $J = 11.0, 5.9$  Hz, 1H), 3.19 – 2.98 (m, 2H);  $^{13}\text{C}$  NMR (100 MHz,  $\text{CDCl}_3$ )  $\delta$  148.1, 135.8, 134.7, 129.1, 126.7, 126.7, 126.6, 125.3, 124.2, 123.5, 66.4, 58.5, 53.1, 39.3; IR (Neat Film, NaCl) 3312, 2923, 2360, 1494, 1454, 1424, 1310, 1280, 1112, 1038, 850, 830, 744, 704  $\text{cm}^{-1}$ ; HRMS (MM:ESI-APCI+)  $m/z$  calc'd for  $\text{C}_{14}\text{H}_{16}\text{NOS}$   $[\text{M}+\text{H}]^+$ : 246.0947, found 246.0941; SFC Conditions: 35% IPA, 2.5 mL/min, Chiralpak OJ-H column,  $\lambda = 210$  nm,  $t_{\text{R}}$  (min): major = 2.86, minor = 6.02.

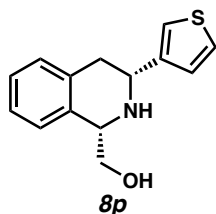

**((1S,3R)-3-(thiophen-3-yl)-1,2,3,4-tetrahydroisoquinolin-1-yl)methanol (8p):** Compound **8p** was prepared from isoquinoline **7p** using general procedure 5 and purified by column chromatography (30% EtOAc in hexanes + 1%  $\text{NEt}_3$ ) to provide a pale beige solid as a mixture of diastereomers (25.5 mg, 52% yield) (dr = 7.3:1). The isolated product contained long-chain hydrocarbon impurities, so it was re-purified by partitioning between acetonitrile and hexanes. The acetonitrile layer was collected and concentrated to afford **8p** as a pale yellow solid (24.0 mg, 49% yield); 89% ee for major diastereomer;  $[\alpha]_{\text{D}}^{25} +86.8$  ( $c$  0.99,  $\text{CHCl}_3$ );  $^1\text{H}$  NMR (400 MHz,  $\text{CDCl}_3$ )  $\delta$  7.24 (dd,  $J = 4.9, 3.0$  Hz, 1H), 7.18 – 7.16 (m, 1H), 7.13 – 7.07 (m, 4H), 7.05 –

7.02 (m, 1H), 4.28 – 4.26 (m, 1H), 4.10 (dd,  $J = 10.8, 3.8$  Hz, 1H), 3.93 (dd,  $J = 10.9, 3.4$  Hz, 1H), 3.73 (dd,  $J = 11.0, 6.1$  Hz, 1H), 2.99 – 2.90 (m, 1H), 2.86 (dd,  $J = 15.8, 3.8$  Hz, 1H);  $^{13}\text{C}$  NMR (100 MHz,  $\text{CDCl}_3$ )  $\delta$  145.3, 136.2, 134.9, 129.3, 126.7, 126.5, 126.5, 126.2, 125.3, 120.9, 66.3, 58.5, 53.3, 38.1; IR (Neat Film, NaCl) 3318, 2924, 2366, 1494, 1454, 1424, 1313, 1279, 1218, 1116, 1038, 854, 782, 748  $\text{cm}^{-1}$ ; HRMS (MM:ESI-APCI+)  $m/z$  calc'd for  $\text{C}_{14}\text{H}_{16}\text{NOS}$   $[\text{M}+\text{H}]^+$ : 246.0947, found 246.0952; SFC Conditions: 35% IPA, 2.5 mL/min, Chiralpak AD-H column,  $\lambda = 210$  nm,  $t_{\text{R}}$  (min): major = 3.19, minor = 4.05.

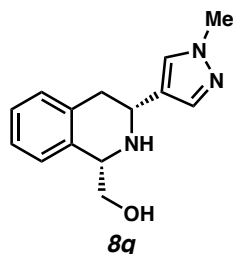

**((1S,3R)-3-(1-methyl-1H-pyrazol-4-yl)-1,2,3,4-tetrahydroisoquinolin-1-yl)methanol (8q):** Compound **8q** was prepared from isoquinoline **7q** using general procedure 5 and purified by column chromatography (5% to 10% MeOH in EtOAc + 1%  $\text{NEt}_3$ ) to provide a pale yellow solid as a mixture of diastereomers (48 mg, 98% yield) (dr = 2.9:1); 87% ee for major diastereomer;  $[\alpha]_{\text{D}}^{25} +37.1$  ( $c$  1.021,  $\text{CHCl}_3$ ); Major diastereomer:  $^1\text{H}$  NMR (400 MHz,  $\text{CDCl}_3$ )  $\delta$  7.63 – 7.61 (m, 2H), 7.26 – 7.16 (m, 2H, integration overlapped with minor diastereomer), 7.19 – 7.06 (m, 2H), 4.50 – 4.98 (m, 1H), 4.20 (dd,  $J = 11.8, 3.3$  Hz, 1H), 4.02 (dd,  $J = 11.6, 3.3$  Hz, 1H), 3.84 (s, 3H), 3.34 – 3.22 (m, 1H), 3.13 – 2.89 (m, 2H);  $^{13}\text{C}$  NMR (100 MHz,  $\text{CDCl}_3$ )  $\delta$  138.2, 134.7, 132.2, 129.3, 129.2, 127.2, 126.9, 125.4, 121.5, 64.6, 58.6, 49.1, 39.0, 36.1; IR (Neat Film, NaCl) 3315, 2931, 2371, 1560, 1494, 1455, 1408, 1295, 1169, 1031, 1008, 986, 748, 724  $\text{cm}^{-1}$ ; HRMS (MM:ESI-APCI+)  $m/z$  calc'd for  $\text{C}_{14}\text{H}_{18}\text{N}_3\text{O}$   $[\text{M}+\text{H}]^+$ : 244.1444, found 244.1448; SFC Conditions: 25% IPA, 2.5 mL/min, Chiralpak OJ-H column,  $\lambda = 210$  nm,  $t_{\text{R}}$  (min): minor = 1.84, major = 2.60.

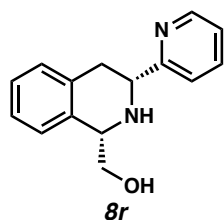

**((1S,3R)-3-(pyridin-2-yl)-1,2,3,4-tetrahydroisoquinolin-1-yl)methanol (8r):** Compound **8r** was prepared from isoquinoline **7r** using general procedure 5 and purified using reverse-phase ( $\text{C}_{18}$ ) preparative-HPLC (MeCN/0.4% acetic acid in water, 5.0 mL/min, monitor wavelength = 255 nm, 5–23% MeCN over 6 min, ramp to 95% MeCN over 0.5 min, and hold at 95% for 3.5 min) to provide a tan solid as a mixture of diastereomers (49 mg, 80% yield) (dr = 2.5:1). *Note:* This compound appears to be unstable and significant decomposition was observed under prolonged storage; 85% ee for major diastereomer;  $[\alpha]_{\text{D}}^{25} +49.0$  ( $c$  1.01,  $\text{CHCl}_3$ ); Major



diastereomer:  $^1\text{H}$  NMR (400 MHz,  $\text{CDCl}_3$ )  $\delta$  8.60 – 8.57 (m, 1H), 7.72 – 7.67 (m, 2H), 7.43 (d,  $J = 7.8$  Hz, 1H), 7.22 – 7.11 (m, 4H, integration overlapped with minor diastereomer), 4.41 – 4.39 (m, 1H), 4.23 – 4.20 (m, 1H, integration overlapped with minor diastereomer), 4.07 (dd,  $J = 11.1, 3.4$  Hz, 1H), 3.85 (dd,  $J = 11.0, 6.4$  Hz, 1H), 3.08 – 3.00 (m, 2H, integration overlapped with minor diastereomer);  $^{13}\text{C}$  NMR (100 MHz,  $\text{CDCl}_3$ )  $\delta$  162.2, 149.4, 137.0, 136.0, 135.3, 129.4, 126.7, 126.5, 125.4, 122.6, 121.1, 66.4, 58.6, 58.0, 36.5; IR (Neat Film, NaCl) 3300, 3056, 2934, 1592, 1574, 1473, 1454, 1435, 1316, 1142, 1060, 910, 744  $\text{cm}^{-1}$ ; HRMS (MM:ESI-APCI+)  $m/z$  calc'd for  $\text{C}_{15}\text{H}_{17}\text{N}_2\text{O}$   $[\text{M}+\text{H}]^+$ : 241.1335, found 241.1334; SFC Conditions: 30% IPA, 2.5 mL/min, Chiralpak OD-H column,  $\lambda = 210$  nm,  $t_{\text{R}}$  (min): minor = 2.52, major = 2.79.

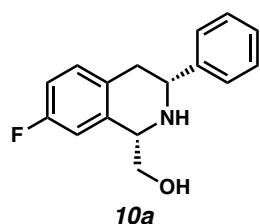

**((1S,3R)-7-fluoro-3-phenyl-1,2,3,4-tetrahydroisoquinolin-1-yl)methanol (10a):** Compound **10a** was prepared from isoquinoline **9a** using general procedure 5 and purified by column chromatography (30% EtOAc in hexanes + 1%  $\text{NEt}_3$ ) to provide a pale yellow solid as a mixture of diastereomers (49 mg, 94% yield) (dr = 11.5:1); 93% ee for major diastereomer;  $[\alpha]_{\text{D}}^{25} +76.9$  ( $c$  1.04,  $\text{CHCl}_3$ ); Major diastereomer:  $^1\text{H}$  NMR (400 MHz,  $\text{CDCl}_3$ )  $\delta$  7.47 – 7.42 (m, 2H), 7.40 – 7.36 (m, 2H), 7.33 – 7.30 (m, 1H), 7.08 (dd,  $J = 8.4, 5.8$  Hz, 1H), 6.97 – 6.87 (m, 2H), 4.38 – 4.36 (m, 1H), 4.06 (dd,  $J = 10.8, 3.7$  Hz, 1H), 3.99 (dd,  $J = 10.9, 3.3$  Hz, 1H), 3.86 (dd,  $J = 10.9, 5.2$  Hz, 1H), 3.00 – 2.82 (m, 2H);  $^{13}\text{C}$  NMR (100 MHz,  $\text{CDCl}_3$ )  $\delta$  161.5 (d,  $J = 243.8$  Hz), 144.0, 136.9 (d,  $J = 6.8$  Hz), 132.2 (d,  $J = 3.0$  Hz), 130.6 (d,  $J = 7.9$  Hz), 128.8, 127.8, 126.8, 113.9 (d,  $J = 21.3$  Hz), 112.1 (d,  $J = 21.8$  Hz), 66.4, 58.6 (d,  $J = 2.1$  Hz), 57.7, 38.2;  $^{19}\text{F}$  NMR (282 MHz,  $\text{CDCl}_3$ )  $\delta$  -116.2 – -116.4 (m); IR (Neat Film, NaCl) 3309, 2918, 1614, 1498, 1455, 1428, 1255, 1221, 1031, 911, 868, 808, 758, 745, 700  $\text{cm}^{-1}$ ; HRMS (MM:ESI-APCI+)  $m/z$  calc'd for  $\text{C}_{16}\text{H}_{17}\text{FNO}$   $[\text{M}+\text{H}]^+$ : 258.1289, found 258.1281; SFC Conditions: 40% IPA, 2.5 mL/min, Chiralpak AD-H column,  $\lambda = 210$  nm,  $t_{\text{R}}$  (min): major = 2.56, minor = 3.04.

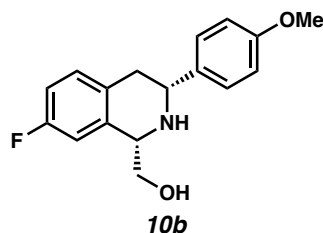

**((1S,3R)-7-fluoro-3-(4-methoxyphenyl)-1,2,3,4-tetrahydroisoquinolin-1-yl)methanol (10b):** Compound **10b** was prepared from isoquinoline **9b** using general procedure 5 and purified by column chromatography (30% to 40% EtOAc in hexanes + 1%  $\text{NEt}_3$ ) to provide a pale yellow solid as a single diastereomer (57 mg, 99% yield); 90% ee;  $[\alpha]_{\text{D}}^{25} +57.8$  ( $c$  0.99,  $\text{CHCl}_3$ );  $^1\text{H}$

NMR (400 MHz, CDCl<sub>3</sub>)  $\delta$  7.38 – 7.34 (m, 2H), 7.07 (dd,  $J$  = 8.4, 5.8 Hz, 1H), 6.97 – 6.84 (m, 4H), 4.36 – 4.34 (m, 1H), 3.99 (ddd,  $J$  = 12.3, 10.9, 3.4 Hz, 2H), 3.86 – 3.84 (m, 1H), 3.82 (s, 3H), 2.99 – 2.87 (m, 1H), 2.83 (dd,  $J$  = 15.6, 3.5 Hz, 1H); <sup>13</sup>C NMR (100 MHz, CDCl<sub>3</sub>)  $\delta$  161.5 (d,  $J$  = 243.7 Hz), 159.2, 136.9 (d,  $J$  = 6.7 Hz), 136.2, 132.3, 130.6 (d,  $J$  = 7.9 Hz), 127.9, 114.1, 113.8 (d,  $J$  = 21.3 Hz), 112.1 (d,  $J$  = 21.8 Hz), 66.4, 58.7 (d,  $J$  = 2.0 Hz), 57.1, 55.5, 38.3; <sup>19</sup>F NMR (282 MHz, CDCl<sub>3</sub>)  $\delta$  –116.3 – –116.4 (m); IR (Neat Film, NaCl) 3305, 2930, 2838, 1614, 1591, 1514, 1498, 1304, 1249, 1178, 1111, 1034, 912, 868, 830, 816, 736 cm<sup>-1</sup>; HRMS (MM:ESI-APCI+)  $m/z$  calc'd for C<sub>17</sub>H<sub>19</sub>FNO<sub>2</sub> [M+H]<sup>+</sup>: 288.1394, found 288.1404; SFC Conditions: 30% IPA, 2.5 mL/min, Chiralpak OJ-H column,  $\lambda$  = 210 nm,  $t_R$  (min): major = 1.93, minor = 2.42.

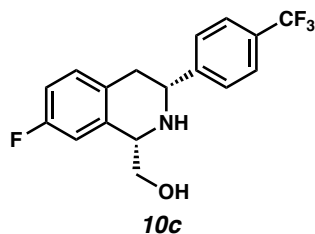

**((1S,3R)-7-fluoro-3-(4-(trifluoromethyl)phenyl)-1,2,3,4-tetrahydroisoquinolin-1-yl)methanol (10c):** Compound **10c** was prepared from isoquinoline **9c** using general procedure 5 and purified by column chromatography (20% to 30% EtOAc in hexanes + 1% NEt<sub>3</sub>) to provide a pale yellow solid as a mixture of diastereomers (50 mg, 77% yield) (dr = 6.7:1); 94% ee for major diastereomer;  $[\alpha]_D^{25}$  +44.2 ( $c$  1.002, CHCl<sub>3</sub>); Major diastereomer: <sup>1</sup>H NMR (400 MHz, CDCl<sub>3</sub>)  $\delta$  7.64 (d,  $J$  = 8.3 Hz, 2H), 7.58 (d,  $J$  = 8.1 Hz, 2H), 7.09 (dd,  $J$  = 8.4, 5.7 Hz, 1H), 7.00 – 6.87 (m, 2H), 4.39 – 4.37 (m, 1H), 4.13 (dd,  $J$  = 8.9, 5.7 Hz, 1H), 4.02 (dd,  $J$  = 10.9, 3.3 Hz, 1H), 3.88 (dd,  $J$  = 10.9, 5.4 Hz, 1H), 2.94 – 2.84 (m, 2H); <sup>13</sup>C NMR (100 MHz, CDCl<sub>3</sub>)  $\delta$  161.6 (d,  $J$  = 244.2 Hz), 148.0, 136.7 (d,  $J$  = 6.7 Hz), 131.5 (d,  $J$  = 3.1 Hz), 130.6 (d,  $J$  = 7.9 Hz), 130.1 (q,  $J$  = 32.5 Hz), 127.2, 125.7 (q,  $J$  = 3.8 Hz), 124.2 (q,  $J$  = 272.1 Hz), 114.0 (d,  $J$  = 21.3 Hz), 112.1 (d,  $J$  = 21.9 Hz) 66.4, 58.5 (d,  $J$  = 2.0 Hz), 57.4, 38.2; <sup>19</sup>F NMR (282 MHz, CDCl<sub>3</sub>)  $\delta$  –62.5, –115.8 – –115.9 (m); IR (Neat Film, NaCl) 3304, 2922, 1620, 1593, 1500, 1428, 1326, 1255, 1222, 1165, 1125, 1068, 1018, 868, 836, 816 cm<sup>-1</sup>; HRMS (MM:ESI-APCI+)  $m/z$  calc'd for C<sub>17</sub>H<sub>16</sub>F<sub>4</sub>NO [M+H]<sup>+</sup>: 326.1163, found 326.1175; SFC Conditions: 20% IPA, 2.5 mL/min, Chiralpak AD-H column,  $\lambda$  = 210 nm,  $t_R$  (min): major = 3.93, minor = 4.46.

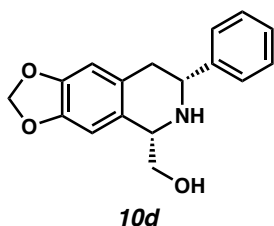

**((5S,7R)-7-phenyl-5,6,7,8-tetrahydro-[1,3]dioxolo[4,5-g]isoquinolin-5-yl)methanol (10d):**

Compound **10d** was prepared from isoquinoline **9d** using general procedure 5 and purified by column chromatography (75% EtOAc in hexanes + 1% NEt<sub>3</sub>) to provide a pale beige solid as a mixture of diastereomers (17 mg, 30% yield) (dr = 4.9:1); 58% ee for major diastereomer;  $[\alpha]_D^{25} +29.2$  (*c* 0.940, CHCl<sub>3</sub>); Major diastereomer: <sup>1</sup>H NMR (400 MHz, CDCl<sub>3</sub>) δ 7.47 – 7.41 (m, 2H), 7.39 – 7.37 (m, 2H), 7.33 – 7.27 (m, 1H), 6.71 (s, 1H), 6.60 – 6.58 (m, 1H), 5.95 – 5.89 (m, 2H), 4.32 – 4.30 (m, 1H), 4.04 (dd, *J* = 11.1, 3.4 Hz, 1H), 3.93 (dd, *J* = 10.9, 3.2 Hz, 1H), 3.82 (dd, *J* = 10.9, 5.1 Hz, 1H), 2.97 – 2.88 (m, 1H), 2.78 (dd, *J* = 15.5, 3.4 Hz, 1H); <sup>13</sup>C NMR (100 MHz, CDCl<sub>3</sub>) δ 146.5, 146.4, 144.2, 130.0, 128.8, 127.9, 127.7, 126.8, 109.0, 105.5, 101.0, 66.7, 58.6, 57.7, 39.0; IR (Neat Film, NaCl) 3324, 3028, 2897, 1504, 1486, 1454, 1434, 1384, 1306, 1279, 1231, 1128, 1038, 936, 910, 858, 750, 733, 701 cm<sup>-1</sup>; HRMS (MM:ESI-APCI+) *m/z* calc'd for C<sub>17</sub>H<sub>18</sub>NO<sub>3</sub> [M+H]<sup>+</sup>: 284.1281, found 284.1276; SFC Conditions: 45% IPA, 2.5 mL/min, Chiralpak AD-H column, λ = 210 nm, *t<sub>R</sub>* (min): major = 5.00, minor = 7.22.

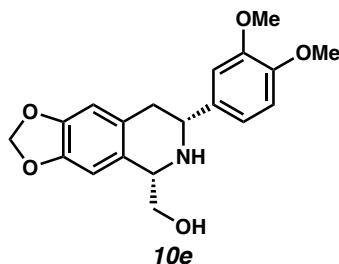

**((5*S*,7*R*)-7-(3,4-dimethoxyphenyl)-5,6,7,8-tetrahydro-[1,3]dioxolo[4,5-*g*]isoquinolin-5-yl)methanol (**10e**):** Compound **10e** was prepared from isoquinoline **9e** using general procedure 5 and purified by column chromatography (100% EtOAc to 10% MeOH in EtOAc + 1% NEt<sub>3</sub>) to provide a pale yellow solid as a single diastereomer (28 mg, 41% yield); 54% ee;  $[\alpha]_D^{25} +25.5$  (*c* 0.197, CH<sub>3</sub>OH); <sup>1</sup>H NMR (400 MHz, CDCl<sub>3</sub>) δ 6.99 – 6.96 (m, 2H), 6.87 – 6.85 (m, 1H), 6.71 (s, 1H), 6.60 – 6.58 (m, 1H), 5.94 – 5.91 (m, 2H), 4.32 – 4.30 (m, 1H), 3.99 (dd, *J* = 11.1, 3.4 Hz, 1H), 3.94 (dd, *J* = 11.1, 3.4 Hz, 1H), 3.91 (s, 3H), 3.89 (s, 3H), 3.83 (dd, *J* = 11.0, 5.0 Hz, 1H), 2.97 – 2.85 (m, 1H), 2.76 (dd, *J* = 15.6, 3.4 Hz, 1H); <sup>13</sup>C NMR (100 MHz, CDCl<sub>3</sub>) δ 149.3, 148.7, 146.7, 146.5, 136.9, 130.1, 127.8, 119.0, 111.4, 110.0, 109.1, 105.6, 101.1, 66.7, 58.8, 57.7, 56.2, 39.1; IR (Neat Film, NaCl) 3374, 2890, 2360, 1505, 1487, 1268, 1260, 1237, 1140, 1076, 1024, 971, 932, 918, 730 cm<sup>-1</sup>; HRMS (MM:ESI-APCI+) *m/z* calc'd for C<sub>19</sub>H<sub>22</sub>NO<sub>5</sub> [M+H]<sup>+</sup>: 344.1492, found 344.1483; SFC Conditions: 45% IPA, 2.5 mL/min, Chiralpak AD-H column, λ = 210 nm, *t<sub>R</sub>* (min): major = 3.89, minor = 5.16.

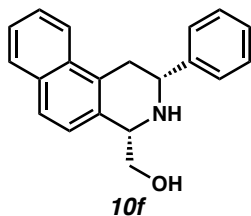

**((2*R*,4*S*)-2-phenyl-1,2,3,4-tetrahydrobenzo[*f*]isoquinolin-4-yl)methanol (**10f**):** Compound **10f** was prepared from isoquinoline **9f** using general procedure 5 and purified by column

chromatography (40% to 60% EtOAc in hexanes + 1% NEt<sub>3</sub>) to provide a pale yellow solid as a mixture of diastereomers (25 mg, 43% yield) (dr = 15.7:1); 82% ee for major diastereomer;  $[\alpha]_D^{25} +85.7$  (*c* 1.01, CHCl<sub>3</sub>); Major diastereomer: <sup>1</sup>H NMR (400 MHz, CDCl<sub>3</sub>) δ 7.93 – 7.91 (m, 1H), 7.85 – 7.82 (m, 1H), 7.75 (d, *J* = 8.6 Hz, 1H), 7.55 (d, *J* = 7.2 Hz, 2H), 7.50 – 7.47 (m, 2H), 7.45 – 7.34 (m, 4H), 4.61 – 4.59 (m, 1H), 4.20 (dd, *J* = 11.0, 3.4 Hz, 1H), 4.09 (dd, *J* = 10.9, 3.2 Hz, 1H), 4.01 (dd, *J* = 10.9, 4.8 Hz, 1H), 3.50 – 3.39 (m, 1H), 3.23 – 3.10 (m, 1H); <sup>13</sup>C NMR (100 MHz, CDCl<sub>3</sub>) δ 144.4, 132.2, 132.1, 132.0, 131.9, 128.8, 128.4, 127.7, 126.8, 126.7, 126.3, 125.5, 123.4, 122.9, 66.4, 59.1, 57.6, 35.4; IR (Neat Film, NaCl) 3306, 3056, 2918, 1417, 1308, 1034, 910, 884, 813, 762, 700, 736, 682 cm<sup>-1</sup>; HRMS (MM:ESI-APCI+) *m/z* calc'd for C<sub>20</sub>H<sub>20</sub>NO [M+H]<sup>+</sup>: 290.1539, found 290.1534; SFC Conditions: 45% IPA, 2.5 mL/min, Chiralpak AD-H column, λ = 210 nm, t<sub>R</sub> (min): major = 5.31, minor = 10.01.

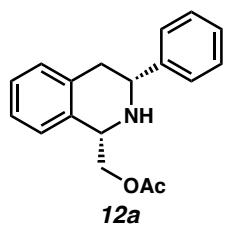

**((1S,3R)-3-phenyl-1,2,3,4-tetrahydroisoquinolin-1-yl)methyl acetate (12a):** Compound **12a** was prepared from isoquinoline **11a** using general procedure 5 and purified by column chromatography (5% EtOAc in CH<sub>2</sub>Cl<sub>2</sub> + 1% NEt<sub>3</sub>) to provide a yellow oil as a single diastereomer (32 mg, 56% yield); 86% ee;  $[\alpha]_D^{25} +103.8$  (*c* 1.01, CHCl<sub>3</sub>); <sup>1</sup>H NMR (400 MHz, CDCl<sub>3</sub>) δ 7.51 – 7.45 (m, 2H), 7.41 – 7.37 (m, 2H), 7.34 – 7.30 (m, 1H), 7.27 – 7.24 (m, 1H), 7.23 – 7.18 (m, 2H), 7.16 – 7.10 (m, 1H), 4.78 (dd, *J* = 10.8, 3.5 Hz, 1H), 4.54 – 4.51 (m, 1H), 4.14 (dd, *J* = 10.8, 8.7 Hz, 1H), 4.05 (dd, *J* = 11.1, 3.4 Hz, 1H), 3.08 – 3.01 (m, 1H), 2.90 (dd, *J* = 15.5, 3.6 Hz, 1H), 2.08 (s, 3H); <sup>13</sup>C NMR (100 MHz, CDCl<sub>3</sub>) δ 171.1, 144.4, 136.3, 134.1, 129.5, 128.8, 127.7, 126.9, 126.9, 126.3, 125.3, 69.1, 57.9, 56.4, 39.2, 21.2; IR (Neat Film, NaCl) 3024, 2926, 2802, 1741, 1494, 1454, 1386, 1366, 1314, 1229, 1118, 1034, 754, 701 cm<sup>-1</sup>; HRMS (MM:ESI-APCI+) *m/z* calc'd for C<sub>18</sub>H<sub>20</sub>NO<sub>2</sub> [M+H]<sup>+</sup>: 282.1489, found 282.1492; SFC Conditions: 20% IPA, 2.5 mL/min, Chiralpak OJ-H column, λ = 210 nm, t<sub>R</sub> (min): major = 3.32, major = 3.93.

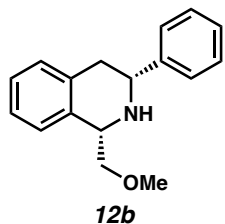

**(1S,3R)-1-(methoxymethyl)-3-phenyl-1,2,3,4-tetrahydroisoquinoline (12b):** Compound **12b** was prepared from isoquinoline **11b** using general procedure 5 and purified by column chromatography (10% EtOAc in CH<sub>2</sub>Cl<sub>2</sub> + 1% NEt<sub>3</sub>) to provide a viscous yellow oil as a single

diastereomer (40 mg, 80% yield); 89% ee;  $[\alpha]_{\text{D}}^{25} +94.3$  ( $c$  0.98,  $\text{CHCl}_3$ );  $^1\text{H}$  NMR (400 MHz,  $\text{CDCl}_3$ )  $\delta$  7.48 – 7.46 (m, 2H), 7.39 – 7.35 (m, 2H), 7.32 – 7.27 (m, 1H), 7.25 – 7.20 (m, 1H), 7.20 – 7.15 (m, 2H), 7.16 – 7.10 (m, 1H), 4.45 – 4.42 (m, 1H), 4.07 – 3.94 (m, 2H), 3.59 (t,  $J$  = 8.7 Hz, 1H), 3.43 (s, 3H), 3.06 (dd,  $J$  = 16.0, 11.1 Hz, 1H), 2.92 (dd,  $J$  = 16.0, 3.6 Hz, 1H);  $^{13}\text{C}$  NMR (100 MHz,  $\text{CDCl}_3$ )  $\delta$  144.5, 136.3, 135.4, 129.5, 128.7, 127.5, 126.9, 126.6, 126.1, 124.8, 59.3, 58.1, 57.4, 39.0; IR (Neat Film, NaCl) 3028, 2895, 2812, 1604, 1494, 1454, 1313, 1194, 1112, 1072, 1030, 958, 923, 840, 744, 700  $\text{cm}^{-1}$ ; HRMS (MM:ESI-APCI+)  $m/z$  calc'd for  $\text{C}_{17}\text{H}_{20}\text{NO}$   $[\text{M}+\text{H}]^+$ : 254.1539, found 254.1531; SFC Conditions: 20% IPA, 2.5 mL/min, Chiralpak OD-H column,  $\lambda$  = 210 nm,  $t_{\text{R}}$  (min): major = 4.82, major = 5.25.

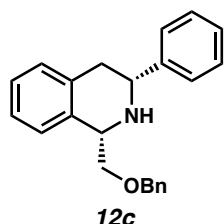

**(1S,3R)-1-((benzyloxy)methyl)-3-phenyl-1,2,3,4-tetrahydroisoquinoline (12c):** Compound **12c** was prepared from isoquinoline **11c** using general procedure 5 and purified by column chromatography (5% EtOAc in  $\text{CH}_2\text{Cl}_2$  + 1%  $\text{NEt}_3$ ) to provide a pale yellow oil as a single diastereomer (60 mg, 90% yield); 88% ee;  $[\alpha]_{\text{D}}^{25} +80.4$  ( $c$  1.02,  $\text{CHCl}_3$ );  $^1\text{H}$  NMR (400 MHz,  $\text{CDCl}_3$ )  $\delta$  7.48 – 7.46 (m, 2H), 7.40 – 7.34 (m, 6H), 7.32 – 7.28 (m, 2H), 7.22 – 7.16 (m, 3H), 7.14 – 7.11 (m, 1H), 4.61 (s, 2H), 4.48 (dd,  $J$  = 8.7, 3.4 Hz, 1H), 4.12 (dd,  $J$  = 9.0, 3.6 Hz, 1H), 4.04 (dd,  $J$  = 11.1, 3.5 Hz, 1H), 3.67 (t,  $J$  = 8.7 Hz, 1H), 3.05 (dd,  $J$  = 15.9, 11.1 Hz, 1H), 2.91 (dd,  $J$  = 15.8, 3.5 Hz, 1H);  $^{13}\text{C}$  NMR (100 MHz,  $\text{CDCl}_3$ )  $\delta$  144.6, 138.3, 136.3, 135.3, 129.5, 128.7, 128.6, 127.9, 127.8, 127.5, 126.9, 126.6, 126.1, 124.9, 74.8, 73.6, 58.1, 57.5, 39.2; IR (Neat Film, NaCl) 3060, 3028, 2862, 1494, 1454, 1366, 1312, 1098, 1028, 742, 698  $\text{cm}^{-1}$ ; HRMS (MM:ESI-APCI+)  $m/z$  calc'd for  $\text{C}_{23}\text{H}_{24}\text{NO}$   $[\text{M}+\text{H}]^+$ : 330.1852, found 330.1857; SFC Conditions: 25% IPA, 2.5 mL/min, Chiralpak OD-H column,  $\lambda$  = 210 nm,  $t_{\text{R}}$  (min): major = 5.66, major = 6.38.

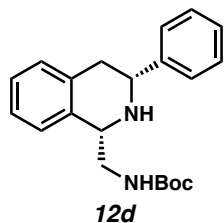

**tert-butyl (((1S,3R)-3-phenyl-1,2,3,4-tetrahydroisoquinolin-1-yl)methyl)carbamate (12d):** Compound **12d** was prepared from isoquinoline **11d** using general procedure 5 and purified by column chromatography (15% EtOAc in hexanes + 1%  $\text{NEt}_3$ ) to provide a white solid as a mixture of diastereomers (44 mg, 71% yield) (dr = 9.0:1); 90% ee for major diastereomer;  $[\alpha]_{\text{D}}^{25} +50.4$  ( $c$  0.99,  $\text{CHCl}_3$ ); Major diastereomer:  $^1\text{H}$  NMR (400 MHz,  $\text{CDCl}_3$ )  $\delta$  7.46 (d,  $J$  = 7.1 Hz, 2H), 7.38 (t,  $J$  = 7.5 Hz, 2H), 7.36 – 7.26 (m, 2H), 7.26 – 7.14 (m, 2H), 7.11 (d,  $J$  = 6.7 Hz, 1H),

5.02 (s, 1H), 4.44 (s, 1H), 4.04 (dd,  $J = 11.0, 3.5$  Hz, 1H), 3.77 – 3.72 (m, 1H), 3.49 (dt,  $J = 13.2, 6.3$  Hz, 1H), 3.00 (dd,  $J = 15.8, 10.9$  Hz, 1H), 2.89 (dd,  $J = 15.8, 3.5$  Hz, 1H), 1.41 (s, 9H);  $^{13}\text{C}$  NMR (100 MHz,  $\text{CDCl}_3$ )  $\delta$  156.4, 144.4, 136.4, 135.2, 129.2, 128.7, 127.7, 126.8, 126.6, 126.4, 125.7, 79.4, 58.0, 57.1, 46.3, 39.1, 28.5; IR (Neat Film, NaCl) 3352, 2978, 2932, 1704, 1495, 1455, 1392, 1366, 1247, 1171, 752, 701  $\text{cm}^{-1}$ ; HRMS (MM:ESI-APCI+)  $m/z$  calc'd for  $\text{C}_{21}\text{H}_{27}\text{N}_2\text{O}_2$   $[\text{M}+\text{H}]^+$ : 339.2067, found 339.2063; SFC Conditions: 40% IPA, 2.5 mL/min, Chiralpak AD-H column,  $\lambda = 210$  nm,  $t_{\text{R}}$  (min): major = 1.41, major = 1.76.

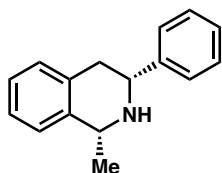**12e**

**(1*R*,3*R*)-1-methyl-3-phenyl-1,2,3,4-tetrahydroisoquinoline (12e):** Compound **12e** was prepared from 1-methyl-3-phenylisoquinoline using general procedure 5 and purified by column chromatography (10% to 20% EtOAc in hexanes + 1%  $\text{NEt}_3$ ) to provide a colorless oil as a single diastereomer (29 mg, 64% yield); 90% ee;  $[\alpha]_{\text{D}}^{25} +133.3$  ( $c$  0.79,  $\text{CHCl}_3$ );  $^1\text{H}$  NMR (400 MHz,  $\text{CDCl}_3$ )  $\delta$  7.49 – 7.46 (m, 2H), 7.41 – 7.37 (m, 2H), 7.33 – 7.29 (m, 1H), 7.28 – 7.23 (m, 1H), 7.23 – 7.14 (m, 2H), 7.11 (d,  $J = 6.9$  Hz, 1H), 4.34 (q,  $J = 6.6$  Hz, 1H), 4.08 (dd,  $J = 11.1, 3.9$  Hz, 1H), 3.12 – 3.01 (m, 1H), 2.96 (dd,  $J = 16.2, 4.1$  Hz, 1H), 1.55 (d,  $J = 6.5$  Hz, 3H);  $^{13}\text{C}$  NMR (100 MHz,  $\text{CDCl}_3$ )  $\delta$  144.5, 139.9, 135.2, 129.1, 128.7, 127.5, 126.7, 126.2, 126.2, 125.4, 58.8, 53.6, 38.9, 22.4; IR (Neat Film, NaCl) 3024, 2962, 2926, 2792, 1602, 1494, 1453, 1372, 1352, 1306, 1140, 1118, 1031, 790, 753, 733, 700  $\text{cm}^{-1}$ ; HRMS (MM:ESI-APCI+)  $m/z$  calc'd for  $\text{C}_{16}\text{H}_{18}\text{N}$   $[\text{M}+\text{H}]^+$ : 224.1434, found 224.1426; SFC Conditions: 20% IPA, 3.5 mL/min, Chiralpak AS-H column,  $\lambda = 210$  nm,  $t_{\text{R}}$  (min): major = 2.16, minor = 2.62.

## Additional Optimization Results

Table S1. Additional Ligand Screen

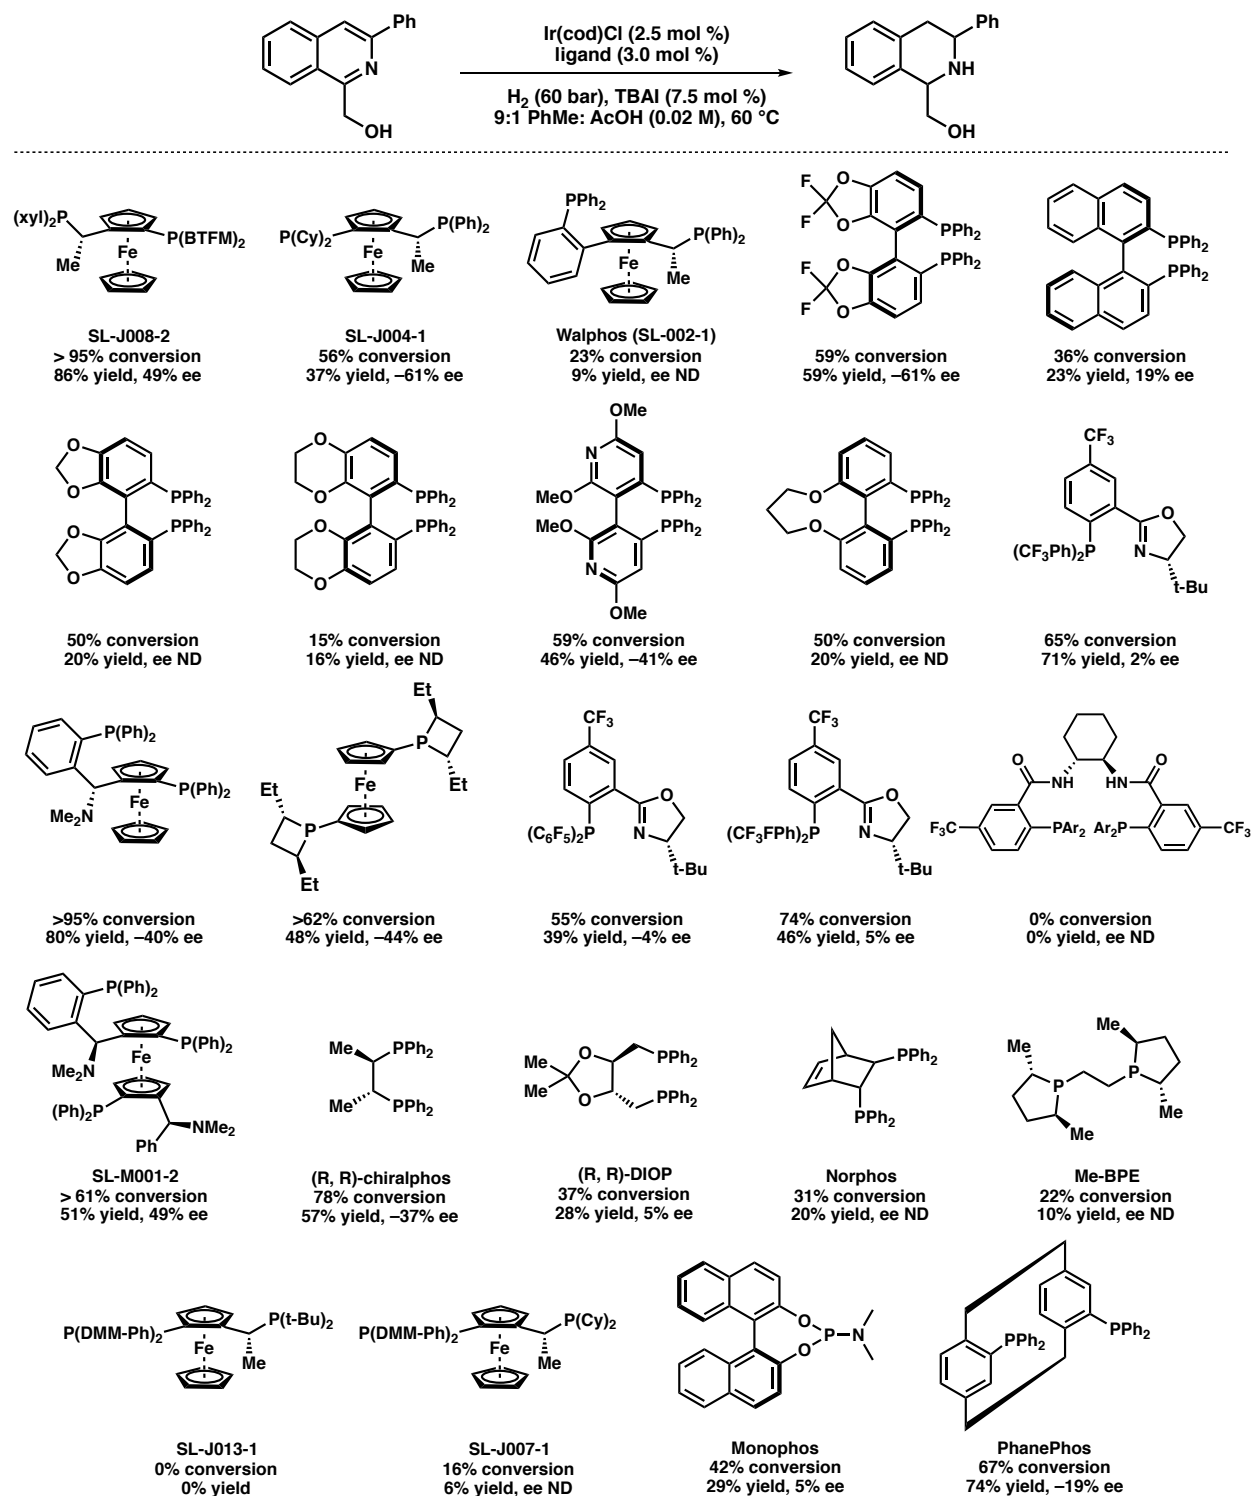

Table S2. Additive Effects<sup>a</sup>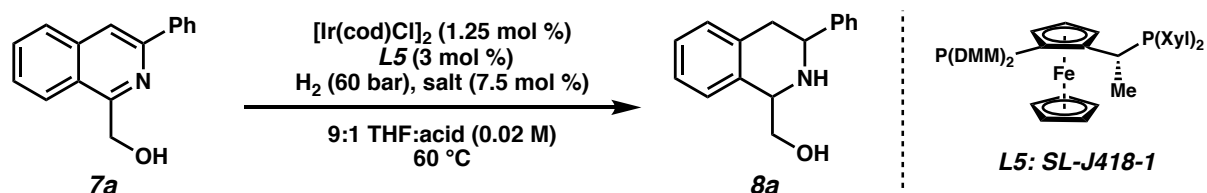

| entry | salt additive | acid                                   | % conversion <sup>b</sup> | cis:trans <sup>b</sup> | % ee of cis <sup>c</sup> |
|-------|---------------|----------------------------------------|---------------------------|------------------------|--------------------------|
| 1     | TBAI          | AcOH                                   | >95                       | 10:1                   | 89                       |
| 2     | Lil           | AcOH                                   | >95                       | 10:1                   | 89                       |
| 3     | NaI           | AcOH                                   | >95                       | 10:1                   | 90                       |
| 4     | KI            | AcOH                                   | 92                        | 10:1                   | 87                       |
| 5     | TBACl         | AcOH                                   | >95                       | 1:1.2                  | 31                       |
| 6     | TBABr         | AcOH                                   | >95                       | 1.2:1                  | 63                       |
| 7     | none          | AcOH                                   | 50                        | 1:1                    | 27                       |
| 8     | TBAI          | none                                   | 31                        | ND                     | 67                       |
| 9     | TBAI          | TFA                                    | >95                       | 10:1                   | 90                       |
| 10    | TBAI          | (n-BuO) <sub>2</sub> PO <sub>2</sub> H | >95                       | 7:1                    | 84                       |

<sup>a</sup>Conditions: 0.04 mmol **1**, 1.25 mol % [Ir(COD)Cl]<sub>2</sub>, 3 mol % ligand, 7.5 mol % salt additive, 60 bar H<sub>2</sub> in 2.0 mL 9:1 THF:acid. <sup>b</sup>Determined from crude <sup>1</sup>H NMR using trimethoxybenzene as a standard.

<sup>c</sup>Determined by chiral SFC analysis of Cbz-protected product.

### Experimental Procedure for Product Transformations:

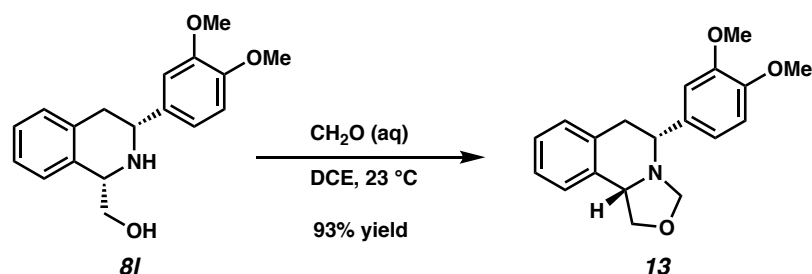

To a 1-dram vial equipped with a stir bar was added tetrahydroisoquinoline **8I** (20.0 mg, 0.067 mmol) in 1,2-dichloroethane (1.3 mL, 0.05 M). Formaldehyde solution (37 wt% in H<sub>2</sub>O, 9.2 μL, 0.124 mmol) was then added and the reaction was stirred for 15 minutes at room temperature. The reaction was then basified with K<sub>2</sub>CO<sub>3</sub>, and extracted with CH<sub>2</sub>Cl<sub>2</sub>. The collected organic layers were dried over Na<sub>2</sub>SO<sub>4</sub>, and concentrated under vacuum. The crude product was purified by column chromatography (50% EtOAc in hexanes + 1% NEt<sub>3</sub>) to afford **13** as a white solid (19.3 mg, 93% yield): [α]<sub>D</sub><sup>25</sup> +134.8 (*c* 1.03, CHCl<sub>3</sub>); <sup>1</sup>H NMR (400 MHz, CDCl<sub>3</sub>) δ 7.25 – 7.14 (m, 3H), 7.04 (d, *J* = 2.0 Hz, 1H), 7.02 – 6.90 (m, 2H), 6.83 (d, *J* = 8.2 Hz, 1H), 4.58 – 4.43 (m, 2H), 3.97 (t, *J* = 7.6 Hz, 1H), 3.94 – 3.87 (m, 2H), 3.89 (s, 6H), 3.83 (dd, *J* = 10.6, 4.8 Hz, 1H), 3.23 (dd, *J* = 16.8, 10.6 Hz, 1H), 3.11 (dd, *J* = 16.8, 4.8 Hz, 1H); <sup>13</sup>C NMR (100 MHz, CDCl<sub>3</sub>) δ



149.4, 148.7, 135.1, 134.7, 134.6, 128.6, 127.2, 126.3, 125.0, 119.6, 110.9, 110.2, 84.2, 71.5, 62.9, 61.3, 56.1, 56.0, 37.3; IR (Neat Film, NaCl) 2930, 1592, 1513, 1454, 1263, 1237, 1167, 1060, 1027, 918, 752, 680  $\text{cm}^{-1}$ ; HRMS (MM:ESI-APCI+)  $m/z$  calc'd for  $\text{C}_{19}\text{H}_{22}\text{NO}_3$   $[\text{M}+\text{H}]^+$ : 312.1594, found 312.1594.

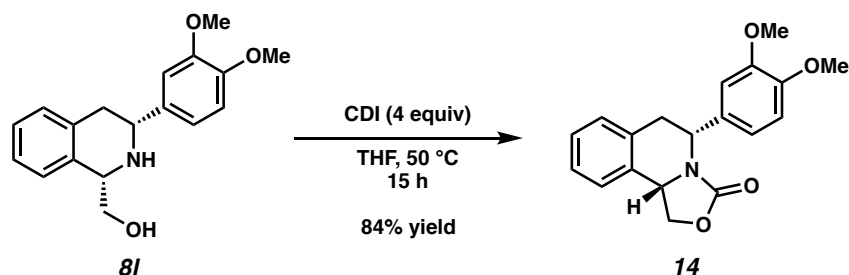

To a 1-dram vial equipped with a stir bar was added tetrahydroisoquinoline **8I** (10.0 mg, 0.033 mmol), THF (0.7 mL, 0.05 M), and CDI (21.7 mg, 0.134 mmol). The solution was stirred at 50 °C for 15 h. After complete conversion of the starting material monitored by TLC, the reaction concentrated and the crude product was purified by preparative-TLC (100% EtOAc) to afford **14** as a white solid (9.2 mg, 84% yield):  $[\alpha]_{\text{D}}^{25} +71.4$  ( $c$  0.76,  $\text{CHCl}_3$ );  $^1\text{H}$  NMR (400 MHz,  $\text{CDCl}_3$ )  $\delta$  7.34 (dd,  $J = 8.3, 7.0$  Hz, 1H), 7.30 – 7.23 (m, 1H), 7.08 (t,  $J = 6.6$  Hz, 2H), 6.66 (d,  $J = 8.2$  Hz, 1H), 6.52 (dd,  $J = 8.2, 2.1$  Hz, 1H), 6.33 (d,  $J = 2.1$  Hz, 1H), 5.14 – 5.02 (m, 2H), 4.92 (t,  $J = 7.9$  Hz, 1H), 4.49 (dd,  $J = 10.1, 8.2$  Hz, 1H), 3.78 (s, 3H), 3.60 (s, 3H), 3.36 (dd,  $J = 14.9, 6.4$  Hz, 1H), 2.99 (dd,  $J = 14.9, 2.7$  Hz, 1H);  $^{13}\text{C}$  NMR (100 MHz,  $\text{CDCl}_3$ )  $\delta$  156.1, 148.7, 148.3, 136.0, 134.2, 133.9, 129.4, 128.5, 127.5, 122.4, 118.5, 110.9, 109.3, 67.5, 55.9, 55.6, 54.6, 53.4, 36.8; IR (Neat Film, NaCl) 2933, 1756, 1515, 1464, 1396, 1260, 1234, 1139, 1025, 779, 762, 748  $\text{cm}^{-1}$ ; HRMS (MM:ESI-APCI+)  $m/z$  calc'd for  $\text{C}_{19}\text{H}_{20}\text{NO}_4$   $[\text{M}+\text{H}]^+$ : 326.1387, found 326.1386.

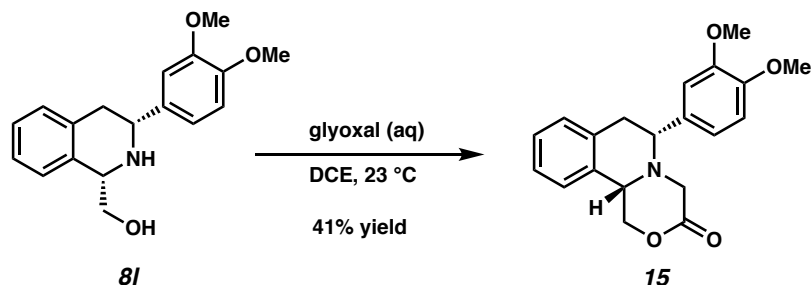

To a 1-dram vial equipped with a stir bar was added tetrahydroisoquinoline **8I** (20.0 mg, 0.067 mmol) in 1,2-dichloroethane (1.3 mL, 0.05 M). Glyoxal solution (40 wt% in  $\text{H}_2\text{O}$ , 0.15 mL, 1.336 mmol) was then added, and the reaction was stirred at room temperature overnight. After complete conversion of the starting material monitored by TLC, the reaction was diluted with  $\text{H}_2\text{O}$ , and extracted with  $\text{CH}_2\text{Cl}_2$ . The collected organic layers were dried over  $\text{Na}_2\text{SO}_4$ , and concentrated under vacuum. The crude product was purified by preparative-TLC (50% EtOAc in hexanes) to afford **15** as a white solid (9.2 mg, 41% yield):  $[\alpha]_{\text{D}}^{25} +187.8$  ( $c$  0.61,  $\text{CHCl}_3$ );  $^1\text{H}$  NMR (400 MHz,  $\text{CDCl}_3$ )  $\delta$  7.29 – 7.20 (m, 2H), 7.20 – 7.10 (m, 2H), 6.95 – 6.81 (m, 3H), 4.84

(dd,  $J = 10.5, 3.4$  Hz, 1H), 4.33 (t,  $J = 10.7$  Hz, 1H), 4.04 – 3.94 (m, 1H), 3.90 (s, 6H), 3.62 (d,  $J = 17.7$  Hz, 1H), 3.43 (dd,  $J = 11.2, 3.2$  Hz, 1H), 3.32 – 3.19 (m, 1H), 2.98 – 2.85 (m, 2H);  $^{13}\text{C}$  NMR (100 MHz,  $\text{CDCl}_3$ )  $\delta$  167.7, 149.8, 149.1, 135.0, 132.8, 130.6, 129.1, 127.7, 126.7, 124.7, 120.5, 111.4, 110.2, 73.3, 63.8, 59.5, 56.1, 56.1, 54.9, 38.9; IR (Neat Film, NaCl) 2932, 1745, 1511, 1463, 1421, 1263, 1242, 1137, 1028, 809, 746  $\text{cm}^{-1}$ ; HRMS (MM:ESI-APCI+)  $m/z$  calc'd for  $\text{C}_{20}\text{H}_{22}\text{NO}_4$   $[\text{M}+\text{H}]^+$ : 340.1543, found 340.1545.

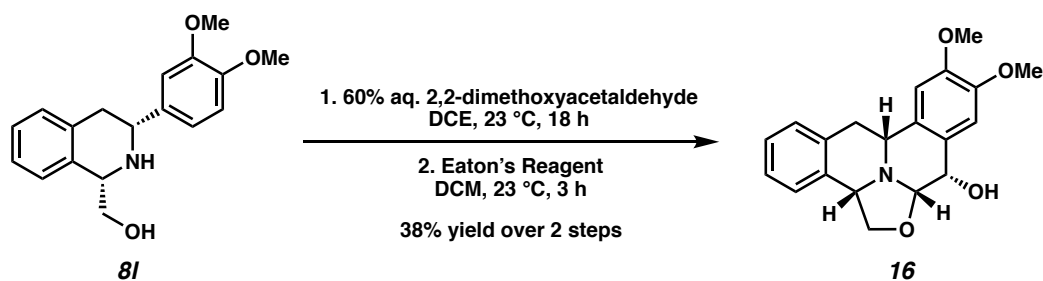

To a 1-dram vial equipped with a stir bar was added tetrahydroisoquinoline **8I** (10.0 mg, 0.033 mmol) in 1,2-dichloroethane (0.5 mL, 0.07 M). 2,2-Dimethoxyacetaldehyde solution (60 wt% in  $\text{H}_2\text{O}$ , 9.2  $\mu\text{L}$ , 0.061 mmol) was then added and the reaction stirred at room temperature overnight. The reaction was then concentrated under vacuum to afford a yellow oil, which was then used in the next step without further purification.

To a 1-dram vial was added the crude product and  $\text{CH}_2\text{Cl}_2$  (0.5 mL, 0.07 M). Eaton's reagent (0.28 mL, 0.134 mmol) was then added dropwise, and the reaction was stirred for 3 hours. The reaction was then quenched by slow addition of saturated aqueous  $\text{NaHCO}_3$ , diluted with  $\text{H}_2\text{O}$  and extracted with  $\text{CH}_2\text{Cl}_2$ . The collected organic phases were dried over  $\text{Na}_2\text{SO}_4$ , and concentrated under vacuum. The crude product was purified by preparative-TLC (100% EtOAc) twice to afford **16** as a white solid as a single diastereomer (4.3 mg, 38% yield over 2 steps):  $[\alpha]_{\text{D}}^{25} +32.0$  ( $c$  0.29,  $\text{CHCl}_3$ );  $^1\text{H}$  NMR (400 MHz,  $\text{CDCl}_3$ )  $\delta$  7.29 – 7.26 (m, 1H), 7.24 – 7.20 (m, 1H), 7.16 (d,  $J = 6.0$  Hz, 1H), 7.08 (d,  $J = 6.8$  Hz, 1H), 6.97 (s, 1H), 6.69 (s, 1H), 4.89 – 4.82 (m, 1H), 4.79 (t,  $J = 7.8$  Hz, 1H), 4.71 (dd,  $J = 8.3, 2.1$  Hz, 1H), 4.65 (d,  $J = 2.1$  Hz, 1H), 4.47 (dd,  $J = 9.1, 7.0$  Hz, 1H), 3.93 (s, 3H), 3.91 (s, 3H), 3.86 (dd,  $J = 7.9, 5.3$  Hz, 1H), 2.89 – 2.87 (m, 2H), 2.79 (d,  $J = 8.4$  Hz, 1H);  $^{13}\text{C}$  NMR (100 MHz,  $\text{CDCl}_3$ )  $\delta$  149.4, 148.6, 136.5, 133.1, 130.9, 129.3, 127.3, 127.3, 126.8, 126.6, 113.6, 109.2, 86.7, 74.4, 67.9, 57.3, 56.2, 56.1, 54.2, 31.1; IR (Neat Film, NaCl) 3442, 2918, 1610, 1515, 1464, 1380, 1353, 1270, 1242, 1160, 1117, 1074, 1010, 868, 762, 732, 642  $\text{cm}^{-1}$ ; HRMS (MM:ESI-APCI+)  $m/z$  calc'd for  $\text{C}_{20}\text{H}_{22}\text{NO}_4$   $[\text{M}+\text{H}]^+$ : 340.1543, found 340.1548.

The stereochemistry of **16** was assigned using diagnostic nOe correlations (highlighted arrows, *vide infra*). Due to the ambiguous nOe correlations observed in **16**, the stereochemistry was determined by derivatizing the hydroxyl group of **16** to the methoxy group.



Table S3. Determination of Enantiomeric Excess

| entry | compound                                                                                             | SFC analytic conditions                                                                                          | ee (%) |
|-------|------------------------------------------------------------------------------------------------------|------------------------------------------------------------------------------------------------------------------|--------|
| 1     | 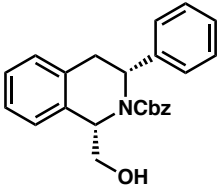<br><b>8a-Cbz</b>   | Chiralpak AD-H, $\lambda = 210$ nm<br>45% IPA/CO <sub>2</sub> , 3.5 mL/min<br>$t_R$ (min) major 2.34, minor 4.02 | 92     |
| 2     | <br><b>8b-Cbz</b>   | Chiralpak AD-H, $\lambda = 210$ nm<br>45% IPA/CO <sub>2</sub> , 3.5 mL/min<br>$t_R$ (min) major 1.81, minor 2.73 | 91     |
| 3     | <br><b>8c-Cbz</b>  | Chiralcel AD-H, $\lambda = 210$ nm<br>45% IPA/CO <sub>2</sub> , 3.5 mL/min<br>$t_R$ (min) major 4.08, minor 5.18 | 92     |
| 4     | <br><b>8d-Cbz</b> | Chiralpak AD-H, $\lambda = 210$ nm<br>45% IPA/CO <sub>2</sub> , 2.5 mL/min<br>$t_R$ (min) major 2.59, minor 3.61 | 92     |
| 5     | <br><b>8e-Cbz</b> | Chiralpak AD-H, $\lambda = 210$ nm<br>45% IPA/CO <sub>2</sub> , 2.5 mL/min<br>$t_R$ (min) major 1.93, minor 2.87 | 93     |
| 6     | <br><b>8f-Cbz</b> | Chiralpak AD-H, $\lambda = 210$ nm<br>25% IPA/CO <sub>2</sub> , 2.5 mL/min<br>$t_R$ (min) major 3.11, minor 5.54 | 92     |

| entry | compound                                                                                                 | SFC analytic conditions                                                                                          | ee (%) |
|-------|----------------------------------------------------------------------------------------------------------|------------------------------------------------------------------------------------------------------------------|--------|
| 7     | 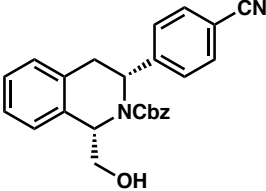 <p><b>8g-Cbz</b></p>   | Chiralpak AD-H, $\lambda = 210$ nm<br>45% IPA/CO <sub>2</sub> , 3.5 mL/min<br>$t_R$ (min) major 2.03, minor 3.33 | 82     |
| 8     |  <p><b>8h-Cbz</b></p>   | Chiralpak AD-H, $\lambda = 210$ nm<br>45% IPA/CO <sub>2</sub> , 3.5 mL/min<br>$t_R$ (min) major 2.45, minor 3.23 | 86     |
| 9     |  <p><b>8i-Cbz</b></p>  | Chiracel AD-H, $\lambda = 210$ nm<br>40% IPA/CO <sub>2</sub> , 2.5 mL/min<br>$t_R$ (min) major 1.67, minor 2.20  | 89     |
| 10    |  <p><b>8j-Cbz</b></p> | Chiralpak AD-H, $\lambda = 210$ nm<br>45% IPA/CO <sub>2</sub> , 3.5 mL/min<br>$t_R$ (min) major 3.61, minor 5.81 | 95     |
| 11    |  <p><b>8k-Cbz</b></p> | Chiralpak AD-H, $\lambda = 210$ nm<br>45% IPA/CO <sub>2</sub> , 3.5 mL/min<br>$t_R$ (min) major 1.95, minor 3.02 | 92     |
| 12    |  <p><b>8l-Cbz</b></p> | Chiralpak AD-H, $\lambda = 210$ nm<br>45% IPA/CO <sub>2</sub> , 3.5 mL/min<br>$t_R$ (min) major 2.28, minor 2.93 | 88     |

| entry | compound                                                                                             | SFC analytic conditions                                                                                          | ee (%) |
|-------|------------------------------------------------------------------------------------------------------|------------------------------------------------------------------------------------------------------------------|--------|
| 13    | 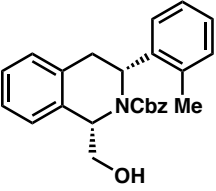<br><b>8m-Cbz</b>   | Chiralpak AD-H, $\lambda = 210$ nm<br>30% IPA/CO <sub>2</sub> , 2.5 mL/min<br>$t_R$ (min) major 5.91, minor 6.39 | 49     |
| 14    | <br><b>8n-Cbz</b>   | Chiralpak OJ-H, $\lambda = 210$ nm<br>35% IPA/CO <sub>2</sub> , 2.5 mL/min<br>$t_R$ (min) major 1.52, minor 1.82 | 92     |
| 15    | <br><b>8o-Cbz</b>   | Chiracel OJ-H, $\lambda = 210$ nm<br>35% IPA/CO <sub>2</sub> , 2.5 mL/min<br>$t_R$ (min) major 2.86, minor 6.02  | 90     |
| 16    | <br><b>8p-Cbz</b> | Chiralpak AD-H, $\lambda = 210$ nm<br>45% IPA/CO <sub>2</sub> , 3.5 mL/min<br>$t_R$ (min) major 3.19, minor 4.05 | 89     |
| 17    | <br><b>8q-Cbz</b> | Chiralpak OJ-H, $\lambda = 210$ nm<br>25% IPA/CO <sub>2</sub> , 2.5 mL/min<br>$t_R$ (min) minor 1.84, major 2.60 | 87     |
| 18    | <br><b>8r-Cbz</b> | Chiralpak OD-H, $\lambda = 210$ nm<br>30% IPA/CO <sub>2</sub> , 2.5 mL/min<br>$t_R$ (min) major 2.52, minor 2.79 | 85     |

| entry | compound                                                                                              | SFC analytic conditions                                                                                                    | ee (%) |
|-------|-------------------------------------------------------------------------------------------------------|----------------------------------------------------------------------------------------------------------------------------|--------|
| 19    | 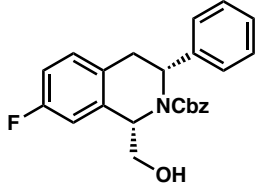<br><b>10a-Cbz</b>   | Chiralpak AD-H, $\lambda = 210$ nm<br>40% IPA/CO <sub>2</sub> , 2.5 mL/min<br>t <sub>R</sub> (min) major 2.56, minor 3.04  | 93     |
| 20    | <br><b>10b-Cbz</b>   | Chiralpak OJ-H, $\lambda = 210$ nm<br>30% IPA/CO <sub>2</sub> , 2.5 mL/min<br>t <sub>R</sub> (min) major 1.93, minor 2.42  | 90     |
| 21    | <br><b>10c-Cbz</b>   | Chiralcel AD-H, $\lambda = 210$ nm<br>20% IPA/CO <sub>2</sub> , 2.5 mL/min<br>t <sub>R</sub> (min) major 3.93, minor 4.46  | 94     |
| 22    | <br><b>10d-Cbz</b> | Chiralpak AD-H, $\lambda = 210$ nm<br>45% IPA/CO <sub>2</sub> , 2.5 mL/min<br>t <sub>R</sub> (min) major 5.00, minor 7.22  | 58     |
| 23    | <br><b>10e-Cbz</b> | Chiralpak AD-H, $\lambda = 210$ nm<br>45% IPA/CO <sub>2</sub> , 2.5 mL/min<br>t <sub>R</sub> (min) major 3.89, minor 5.16  | 54     |
| 24    | <br><b>10f-Cbz</b> | Chiralpak AD-H, $\lambda = 210$ nm<br>45% IPA/CO <sub>2</sub> , 2.5 mL/min<br>t <sub>R</sub> (min) major 5.31, minor 10.01 | 82     |

| entry | compound                                                                                                  | SFC analytic conditions                                                                                          | ee (%) |
|-------|-----------------------------------------------------------------------------------------------------------|------------------------------------------------------------------------------------------------------------------|--------|
| 25    | 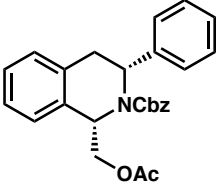 <p><b>12a-Cbz</b></p>   | Chiralpak OJ-H, $\lambda = 210$ nm<br>20% IPA/CO <sub>2</sub> , 2.5 mL/min<br>$t_R$ (min) major 3.32, minor 3.93 | 86     |
| 26    |  <p><b>12b-Cbz</b></p>   | Chiralcel OD-H, $\lambda = 210$ nm<br>20% IPA/CO <sub>2</sub> , 2.5 mL/min<br>$t_R$ (min) major 4.82, minor 5.25 | 89     |
| 27    |  <p><b>12c-Cbz</b></p>   | Chiralpak OD-H, $\lambda = 210$ nm<br>25% IPA/CO <sub>2</sub> , 2.5 mL/min<br>$t_R$ (min) major 5.66, minor 6.38 | 88     |
| 28    |  <p><b>12d-Cbz</b></p> | Chiralpak AD-H, $\lambda = 210$ nm<br>40% IPA/CO <sub>2</sub> , 2.5 mL/min<br>$t_R$ (min) major 1.41, minor 1.76 | 90     |
| 29    |  <p><b>12e-Cbz</b></p> | Chiralpak AS-H, $\lambda = 210$ nm<br>20% IPA/CO <sub>2</sub> , 3.5 mL/min<br>$t_R$ (min) major 2.16, minor 2.62 | 90     |



**X-Ray Crystal Structure Data for Hydrogenated Product 8p**

The tetrahydroisoquinoline product **8p** (87% ee) was crystallized by slow evaporation from chloroform at 23 °C to provide crystals suitable for X-ray analysis.

Compound d19110 crystallizes in the monoclinic space group  $P2_1(\#4)$  with one molecule in the asymmetric unit. The S atom and one C atom were disordered 60:40; the anisotropic displacement parameters of each of the C S bonded pairs were constrained to be the same

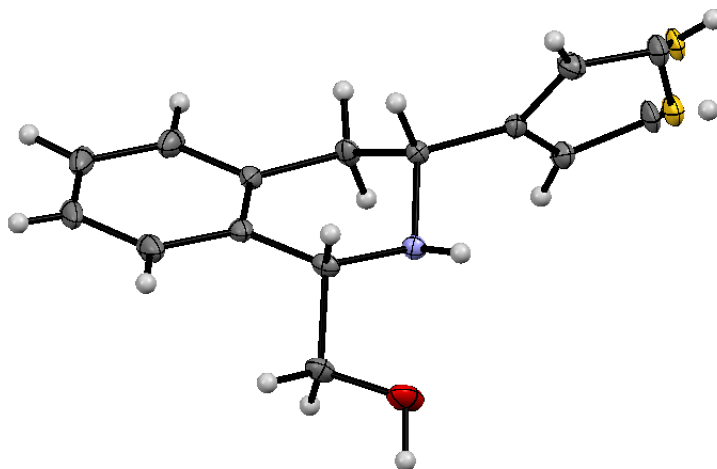**Table S4. Crystal data and structure refinement for d19110.**

|                                 |                                          |                |
|---------------------------------|------------------------------------------|----------------|
| Identification code             | d19110                                   |                |
| Empirical formula               | C <sub>14</sub> H <sub>15</sub> N O S    |                |
| Formula weight                  | 245.33                                   |                |
| Temperature                     | 100 K                                    |                |
| Wavelength                      | 0.71073 Å                                |                |
| Crystal system                  | Monoclinic                               |                |
| Space group                     | P 1 21 1                                 |                |
| Unit cell dimensions            | a = 8.3309(19) Å                         | a = 90°        |
|                                 | b = 6.6556(18) Å                         | b = 96.337(8)° |
|                                 | c = 10.916(3) Å                          | g = 90°        |
| Volume                          | 601.6(3) Å <sup>3</sup>                  |                |
| Z                               | 2                                        |                |
| Density (calculated)            | 1.354 g/cm <sup>3</sup>                  |                |
| Absorption coefficient          | 0.251 mm <sup>-1</sup>                   |                |
| F(000)                          | 260                                      |                |
| Crystal size                    | 0.38 x 0.17 x 0.08 mm <sup>3</sup>       |                |
| Theta range for data collection | 1.877 to 35.613°                         |                |
| Index ranges                    | -13 ≤ h ≤ 13, -10 ≤ k ≤ 10, -17 ≤ l ≤ 17 |                |

|                                       |                                             |
|---------------------------------------|---------------------------------------------|
| Reflections collected                 | 25734                                       |
| Independent reflections               | 5228 [R(int) = 0.0337]                      |
| Completeness to theta = 25.242°       | 99.5 %                                      |
| Absorption correction                 | Semi-empirical from equivalents             |
| Max. and min. transmission            | 1.0000 and 0.9299                           |
| Refinement method                     | Full-matrix least-squares on F <sup>2</sup> |
| Data / restraints / parameters        | 5228 / 1 / 209                              |
| Goodness-of-fit on F <sup>2</sup>     | 1.058                                       |
| Final R indices [I>2sigma(I)]         | R1 = 0.0383, wR2 = 0.0909                   |
| R indices (all data)                  | R1 = 0.0484, wR2 = 0.0960                   |
| Absolute structure parameter [Flack]  | 0.04(2)                                     |
| Absolute structure parameter [Hoofit] | 0.03(2)                                     |
| Extinction coefficient                | n/a                                         |
| Largest diff. peak and hole           | 0.457 and -0.227 e.Å <sup>-3</sup>          |

**Table S5. Atomic coordinates ( x 10<sup>5</sup>), equivalent isotropic displacement parameters (Å<sup>2</sup>x 10<sup>4</sup>), and population for d19110. U(eq) is defined as one third of the trace of the orthogonalized U<sup>ij</sup> tensor.**

|        | x          | y          | z         | U(eq)  | pop     |
|--------|------------|------------|-----------|--------|---------|
| S(1)   | -1782(9)   | 10112(13)  | 8554(8)   | 192(2) | 0.61(1) |
| S(1A)  | -12835(17) | 26880(20)  | 15351(16) | 200(4) | 0.40(1) |
| O(1)   | 46731(15)  | 90530(20)  | 2239(13)  | 250(3) | 1       |
| N(1)   | 38190(14)  | 60130(20)  | 16462(10) | 126(2) | 1       |
| C(1)   | 31520(15)  | 47500(20)  | 25761(12) | 119(2) | 1       |
| C(2)   | 45361(17)  | 34360(20)  | 31317(14) | 146(2) | 1       |
| C(3)   | 59104(16)  | 47440(20)  | 36870(12) | 135(2) | 1       |
| C(4)   | 69583(19)  | 40430(30)  | 46858(14) | 193(3) | 1       |
| C(5)   | 81732(19)  | 52630(30)  | 52519(15) | 236(3) | 1       |
| C(6)   | 83610(20)  | 71900(30)  | 48189(15) | 243(4) | 1       |
| C(7)   | 73300(20)  | 79110(30)  | 38302(15) | 210(3) | 1       |
| C(8)   | 60916(17)  | 66970(20)  | 32554(13) | 140(2) | 1       |
| C(9)   | 49394(17)  | 75610(20)  | 22155(13) | 133(2) | 1       |
| C(10)  | 58373(18)  | 84320(30)  | 11976(14) | 174(3) | 1       |
| C(11)  | 16954(16)  | 36170(20)  | 20222(13) | 127(2) | 1       |
| C(12)  | 17083(17)  | 18760(20)  | 13110(13) | 147(2) | 1       |
| C(13)  | -10370(60) | 29940(90)  | 16190(50) | 192(2) | 0.61(1) |
| C(13A) | 1840(80)   | 11730(130) | 9760(70)  | 200(4) | 0.40(1) |

|       |          |           |           |        |   |
|-------|----------|-----------|-----------|--------|---|
| C(14) | 1166(19) | 42160(30) | 21889(15) | 177(3) | 1 |
|-------|----------|-----------|-----------|--------|---|

---

**Table S6. Bond lengths [Å] and angles [°] for d19110.**

|              |            |
|--------------|------------|
| S(1)-C(12)   | 1.6959(16) |
| S(1)-C(13)   | 1.755(6)   |
| S(1A)-C(13A) | 1.746(9)   |
| S(1A)-C(14)  | 1.6492(19) |
| O(1)-H(1)    | 0.93(3)    |
| O(1)-C(10)   | 1.419(2)   |
| N(1)-H(1A)   | 0.90(2)    |
| N(1)-C(1)    | 1.4732(18) |
| N(1)-C(9)    | 1.4799(19) |
| C(1)-H(1B)   | 1.03(2)    |
| C(1)-C(2)    | 1.5193(19) |
| C(1)-C(11)   | 1.4985(19) |
| C(2)-H(2A)   | 0.98(2)    |
| C(2)-H(2B)   | 1.00(2)    |
| C(2)-C(3)    | 1.511(2)   |
| C(3)-C(4)    | 1.400(2)   |
| C(3)-C(8)    | 1.396(2)   |
| C(4)-H(4)    | 0.91(3)    |
| C(4)-C(5)    | 1.389(2)   |
| C(5)-H(5)    | 0.93(3)    |
| C(5)-C(6)    | 1.382(3)   |
| C(6)-H(6)    | 0.85(3)    |
| C(6)-C(7)    | 1.388(3)   |
| C(7)-H(7)    | 0.99(3)    |
| C(7)-C(8)    | 1.403(2)   |
| C(8)-C(9)    | 1.517(2)   |
| C(9)-H(9)    | 0.99(2)    |
| C(9)-C(10)   | 1.521(2)   |
| C(10)-H(10A) | 0.96(3)    |
| C(10)-H(10B) | 1.01(3)    |
| C(11)-C(12)  | 1.395(2)   |
| C(11)-C(14)  | 1.405(2)   |
| C(12)-C(13A) | 1.365(6)   |
| C(12)-H(12)  | 0.94(2)    |
| C(12)-H(12A) | 0.94(2)    |
| C(13)-H(13)  | 0.91(5)    |

|                    |            |
|--------------------|------------|
| C(13)-C(14)        | 1.357(5)   |
| C(13A)-H(13A)      | 1.04(8)    |
| C(14)-H(14A)       | 0.90(3)    |
| C(14)-H(14)        | 0.90(3)    |
|                    |            |
| C(12)-S(1)-C(13)   | 91.08(18)  |
| C(14)-S(1A)-C(13A) | 91.0(2)    |
| C(10)-O(1)-H(1)    | 112.9(17)  |
| C(1)-N(1)-H(1A)    | 108.6(14)  |
| C(1)-N(1)-C(9)     | 112.10(10) |
| C(9)-N(1)-H(1A)    | 106.4(15)  |
| N(1)-C(1)-H(1B)    | 110.5(13)  |
| N(1)-C(1)-C(2)     | 106.04(11) |
| N(1)-C(1)-C(11)    | 111.07(11) |
| C(2)-C(1)-H(1B)    | 108.3(12)  |
| C(11)-C(1)-H(1B)   | 106.3(12)  |
| C(11)-C(1)-C(2)    | 114.61(12) |
| C(1)-C(2)-H(2A)    | 112.8(13)  |
| C(1)-C(2)-H(2B)    | 110.8(13)  |
| H(2A)-C(2)-H(2B)   | 106(2)     |
| C(3)-C(2)-C(1)     | 109.66(12) |
| C(3)-C(2)-H(2A)    | 108.2(13)  |
| C(3)-C(2)-H(2B)    | 109.0(13)  |
| C(4)-C(3)-C(2)     | 120.00(14) |
| C(8)-C(3)-C(2)     | 120.42(12) |
| C(8)-C(3)-C(4)     | 119.48(14) |
| C(3)-C(4)-H(4)     | 117.4(15)  |
| C(5)-C(4)-C(3)     | 120.85(16) |
| C(5)-C(4)-H(4)     | 121.3(15)  |
| C(4)-C(5)-H(5)     | 120.5(18)  |
| C(6)-C(5)-C(4)     | 119.70(16) |
| C(6)-C(5)-H(5)     | 119.6(18)  |
| C(5)-C(6)-H(6)     | 122.3(19)  |
| C(5)-C(6)-C(7)     | 120.17(15) |
| C(7)-C(6)-H(6)     | 117.3(19)  |
| C(6)-C(7)-H(7)     | 122.1(15)  |
| C(6)-C(7)-C(8)     | 120.68(17) |
| C(8)-C(7)-H(7)     | 117.2(15)  |
| C(3)-C(8)-C(7)     | 119.12(14) |
| C(3)-C(8)-C(9)     | 121.50(12) |

|                     |            |
|---------------------|------------|
| C(7)-C(8)-C(9)      | 119.33(14) |
| N(1)-C(9)-C(8)      | 111.60(12) |
| N(1)-C(9)-H(9)      | 108.5(13)  |
| N(1)-C(9)-C(10)     | 107.26(12) |
| C(8)-C(9)-H(9)      | 111.2(13)  |
| C(8)-C(9)-C(10)     | 111.69(12) |
| C(10)-C(9)-H(9)     | 106.4(14)  |
| O(1)-C(10)-C(9)     | 107.91(12) |
| O(1)-C(10)-H(10A)   | 111.9(15)  |
| O(1)-C(10)-H(10B)   | 111.6(13)  |
| C(9)-C(10)-H(10A)   | 109.0(14)  |
| C(9)-C(10)-H(10B)   | 110.1(14)  |
| H(10A)-C(10)-H(10B) | 106(2)     |
| C(12)-C(11)-C(1)    | 125.94(13) |
| C(12)-C(11)-C(14)   | 111.87(13) |
| C(14)-C(11)-C(1)    | 122.19(13) |
| S(1)-C(12)-H(12)    | 119.9(15)  |
| C(11)-C(12)-S(1)    | 112.40(11) |
| C(11)-C(12)-H(12)   | 127.7(16)  |
| C(11)-C(12)-H(12A)  | 127.7(16)  |
| C(13A)-C(12)-C(11)  | 111.7(4)   |
| C(13A)-C(12)-H(12A) | 120.6(16)  |
| S(1)-C(13)-H(13)    | 105(3)     |
| C(14)-C(13)-S(1)    | 111.3(4)   |
| C(14)-C(13)-H(13)   | 143(3)     |
| S(1A)-C(13A)-H(13A) | 105(3)     |
| C(12)-C(13A)-S(1A)  | 112.0(5)   |
| C(12)-C(13A)-H(13A) | 143(4)     |
| S(1A)-C(14)-H(14A)  | 120.7(15)  |
| C(11)-C(14)-S(1A)   | 113.35(14) |
| C(11)-C(14)-H(14A)  | 125.9(15)  |
| C(11)-C(14)-H(14)   | 125.9(15)  |
| C(13)-C(14)-C(11)   | 113.4(3)   |
| C(13)-C(14)-H(14)   | 120.7(15)  |

---

Symmetry transformations used to generate equivalent atoms:

**Table S7. Anisotropic displacement parameters ( $\text{\AA}^2 \times 10^4$ ) for d19110. The anisotropic displacement factor exponent takes the form:  $-2p^2 [ h^2 a^{*2} U^{11} + \dots + 2 h k a^* b^* U^{12} ]$**

|        | U11    | U22     | U33    | U23     | U13    | U12    |
|--------|--------|---------|--------|---------|--------|--------|
| S(1)   | 146(4) | 220(4)  | 204(4) | -44(3)  | -7(3)  | -76(3) |
| S(1A)  | 121(7) | 246(7)  | 223(6) | -49(5)  | -15(4) | -92(4) |
| O(1)   | 205(6) | 302(7)  | 251(6) | 151(5)  | 60(4)  | 14(5)  |
| N(1)   | 133(5) | 113(5)  | 131(5) | 14(4)   | 8(4)   | -15(4) |
| C(1)   | 109(5) | 126(5)  | 121(5) | 0(4)    | 13(4)  | -11(4) |
| C(2)   | 129(6) | 135(6)  | 168(6) | 39(5)   | -7(4)  | -20(5) |
| C(3)   | 101(5) | 182(6)  | 123(5) | 1(5)    | 14(4)  | 5(5)   |
| C(4)   | 157(6) | 274(8)  | 144(6) | 12(6)   | 2(5)   | 45(5)  |
| C(5)   | 127(6) | 437(10) | 143(6) | -57(6)  | 2(5)   | 35(6)  |
| C(6)   | 148(6) | 416(11) | 167(6) | -123(7) | 23(5)  | -95(6) |
| C(7)   | 191(7) | 255(8)  | 193(6) | -75(6)  | 54(5)  | -94(6) |
| C(8)   | 125(5) | 173(6)  | 126(5) | -31(5)  | 35(4)  | -21(5) |
| C(9)   | 150(6) | 94(5)   | 161(6) | -5(5)   | 45(4)  | -16(4) |
| C(10)  | 171(6) | 166(6)  | 191(6) | 30(5)   | 53(5)  | -35(5) |
| C(11)  | 124(5) | 138(6)  | 114(5) | 5(4)    | -2(4)  | -20(4) |
| C(12)  | 150(6) | 141(6)  | 147(6) | -16(5)  | 10(4)  | -27(5) |
| C(13)  | 146(4) | 220(4)  | 204(4) | -44(3)  | -7(3)  | -76(3) |
| C(13A) | 121(7) | 246(7)  | 223(6) | -49(5)  | -15(4) | -92(4) |
| C(14)  | 153(6) | 197(7)  | 186(6) | -13(5)  | 45(5)  | -5(5)  |

**Table S8. Hydrogen coordinates ( $\times 10^4$ ) and isotropic displacement parameters ( $\text{\AA}^2 \times 10^3$ ) for d19110.**

|        | x         | y        | z        | U(eq) |
|--------|-----------|----------|----------|-------|
| H(1)   | 5130(30)  | 9700(50) | -410(30) | 38    |
| H(1A)  | 3010(30)  | 6680(40) | 1220(20) | 15    |
| H(1B)  | 2770(20)  | 5620(40) | 3270(20) | 14    |
| H(2A)  | 4220(30)  | 2540(40) | 3780(20) | 18    |
| H(2B)  | 4930(30)  | 2550(40) | 2490(20) | 18    |
| H(4)   | 6740(30)  | 2820(40) | 5010(20) | 23    |
| H(5)   | 8820(30)  | 4820(50) | 5950(20) | 28    |
| H(6)   | 9050(30)  | 8010(40) | 5180(20) | 29    |
| H(7)   | 7390(30)  | 9310(40) | 3530(20) | 25    |
| H(9)   | 4290(30)  | 8670(40) | 2510(20) | 16    |
| H(10A) | 6490(30)  | 9530(40) | 1520(20) | 21    |
| H(10B) | 6600(30)  | 7400(40) | 910(20)  | 21    |
| H(13)  | -2130(60) | 2800(70) | 1480(40) | 23    |
| H(13A) | -450(70)  | -40(120) | 550(60)  | 24    |
| H(12)  | 2610(30)  | 1210(40) | 1060(20) | 21    |
| H(12A) | 2610(30)  | 1210(40) | 1060(20) | 21    |
| H(14A) | -150(30)  | 5310(40) | 2600(20) | 21    |
| H(14)  | -150(30)  | 5310(40) | 2600(20) | 21    |

**Table S9. Torsion angles [ $^\circ$ ] for d19110.**

|                         |             |
|-------------------------|-------------|
| S(1)-C(13)-C(14)-C(11)  | 0.6(4)      |
| N(1)-C(1)-C(2)-C(3)     | 58.56(14)   |
| N(1)-C(1)-C(11)-C(12)   | 78.77(18)   |
| N(1)-C(1)-C(11)-C(14)   | -102.09(16) |
| N(1)-C(9)-C(10)-O(1)    | 52.73(16)   |
| C(1)-N(1)-C(9)-C(8)     | 44.46(15)   |
| C(1)-N(1)-C(9)-C(10)    | 167.09(12)  |
| C(1)-C(2)-C(3)-C(4)     | 151.33(13)  |
| C(1)-C(2)-C(3)-C(8)     | -25.09(17)  |
| C(1)-C(11)-C(12)-S(1)   | 179.50(12)  |
| C(1)-C(11)-C(12)-C(13A) | 178.1(4)    |
| C(1)-C(11)-C(14)-S(1A)  | -177.87(13) |
| C(1)-C(11)-C(14)-C(13)  | -179.8(3)   |
| C(2)-C(1)-C(11)-C(12)   | -41.36(19)  |

|                          |             |
|--------------------------|-------------|
| C(2)-C(1)-C(11)-C(14)    | 137.77(14)  |
| C(2)-C(3)-C(4)-C(5)      | -176.42(14) |
| C(2)-C(3)-C(8)-C(7)      | 176.81(13)  |
| C(2)-C(3)-C(8)-C(9)      | -0.66(19)   |
| C(3)-C(4)-C(5)-C(6)      | -0.5(2)     |
| C(3)-C(8)-C(9)-N(1)      | -7.99(18)   |
| C(3)-C(8)-C(9)-C(10)     | -128.05(14) |
| C(4)-C(3)-C(8)-C(7)      | 0.4(2)      |
| C(4)-C(3)-C(8)-C(9)      | -177.09(13) |
| C(4)-C(5)-C(6)-C(7)      | 0.7(2)      |
| C(5)-C(6)-C(7)-C(8)      | -0.3(2)     |
| C(6)-C(7)-C(8)-C(3)      | -0.3(2)     |
| C(6)-C(7)-C(8)-C(9)      | 177.26(14)  |
| C(7)-C(8)-C(9)-N(1)      | 174.55(12)  |
| C(7)-C(8)-C(9)-C(10)     | 54.49(17)   |
| C(8)-C(3)-C(4)-C(5)      | 0.0(2)      |
| C(8)-C(9)-C(10)-O(1)     | 175.30(13)  |
| C(9)-N(1)-C(1)-C(2)      | -71.23(14)  |
| C(9)-N(1)-C(1)-C(11)     | 163.67(12)  |
| C(11)-C(1)-C(2)-C(3)     | -178.55(11) |
| C(11)-C(12)-C(13A)-S(1A) | 0.4(6)      |
| C(12)-S(1)-C(13)-C(14)   | -0.3(4)     |
| C(12)-C(11)-C(14)-S(1A)  | 1.37(18)    |
| C(12)-C(11)-C(14)-C(13)  | -0.6(3)     |
| C(13)-S(1)-C(12)-C(11)   | 0.0(2)      |
| C(13A)-S(1A)-C(14)-C(11) | -0.9(3)     |
| C(14)-S(1A)-C(13A)-C(12) | 0.3(5)      |
| C(14)-C(11)-C(12)-S(1)   | 0.29(16)    |
| C(14)-C(11)-C(12)-C(13A) | -1.1(4)     |

---

Symmetry transformations used to generate equivalent atoms:

**Table S10. Hydrogen bonds for d19110 [Å and °].**

| D-H...A            | d(D-H)  | d(H...A) | d(D...A)   | <(DHA) |
|--------------------|---------|----------|------------|--------|
| O(1)-H(1)...N(1)#1 | 0.93(3) | 1.90(3)  | 2.8310(18) | 177(2) |

---

Symmetry transformations used to generate equivalent atoms: #1 -x+1,y+1/2,-z



## Determination of Relative and Absolute Configuration of 12e

### Method 1 – Vibrational Circular Dichroism (VCD)

**Experimental Protocol.** A solution of **12e** (60 mg/mL) was prepared in CDCl<sub>3</sub> and loaded into a front-loading SL-4 cell (International Crystal Laboratories) possessing BaF<sub>2</sub> windows and 100 μm path length. Infrared (IR) and VCD spectra were acquired on a BioTools ChiralIR-2X VCD spectrometer as a set of set of 27 one-hour blocks (27 blocks, 3120 scans per block) in dual PEM mode. A 15-minute acquisition of neat (-)- $\alpha$ -pinene control (separate 75 μm BaF<sub>2</sub> cell) yielded a VCD spectrum in agreement with literature spectra. IR and VCD spectra were background-corrected using a 30-minute block IR acquisition of the empty instrument chamber under gentle N<sub>2</sub> purge, and were solvent corrected using an 8-hour (8 blocks, 3120 scans per block) IR/VCD acquisition of CDCl<sub>3</sub> in the same 100 μm BaF<sub>2</sub> cell as used for **12e**. The reported spectra represent the result of block averaging.

**Computational Protocol.** The arbitrarily chosen (*S,S*) stereoisomer of compound **12e** (*(S)* at methyl, *(S)* at phenyl; thus *cis*) was subjected to an exhaustive initial molecular mechanics-based conformational search (MMFF94 force field, 0.08 Å geometric RMSD cutoff, and 30 kcal/mol energy window) as implemented in MOE 2019.0102 (Chemical Computing Group, Montreal, CA). All conformers retained the (*S*) configuration at both centers. Separately, a study involving the *trans* stereoisomer possessing the (*R*) configuration at the methyl group and (*S*) configuration at phenyl was performed in identical fashion, with stereochemical integrity again retained throughout the stochastic conformational search. All MMFF94 conformers within a 10 kcal/mol energy window were then subjected to geometry optimization, harmonic frequency calculation, and VCD rotational strength evaluation using density functional theory. All quantum mechanical calculations first utilized the B3LYP functional, small 6-31G\* basis, and IEFPCM model (chloroform solvent) as an initial filter, followed by subsequent optimization using B3PW91 functional, cc-pVTZ basis, and implicit IEFPCM chloroform solvation model on all IEFPCM-B3LYP/6-31G\* conformers below 5 kcal/mol. All calculations were performed with the *Gaussian 16* program system (Rev. C.01; Frisch *et al.*, Gaussian, Inc., Wallingford, CT). Resultant IEFPCM-B3PW91/cc-pVTZ harmonic frequencies were scaled by 0.98. All structurally unique conformers possessing all positive Hessian eigenvalues were Boltzmann weighted by relative free energy at 298.15 K. The predicted IR and VCD frequencies and intensities of the retained conformers were convolved using Lorentzian line shapes ( $\gamma = 4 \text{ cm}^{-1}$ ) and summed using the respective Boltzmann weights to yield the final predicted IR and VCD spectra of the species described above. The predicted VCD of the corresponding enantiomers were generated by inversion of sign. From a combination of (a) the best overall agreement of (*R,R*)-**12e** with experiment among all of the theoretical spectra in the useful range of the VCD (~1000-1450 cm<sup>-1</sup>, regions **A-D**; see below) coupled with (b) support of this assignment by the agreement between predicted versus measured optical rotation (see Method 2) the absolute configuration of **6e** was established as *cis* and (*R,R*).

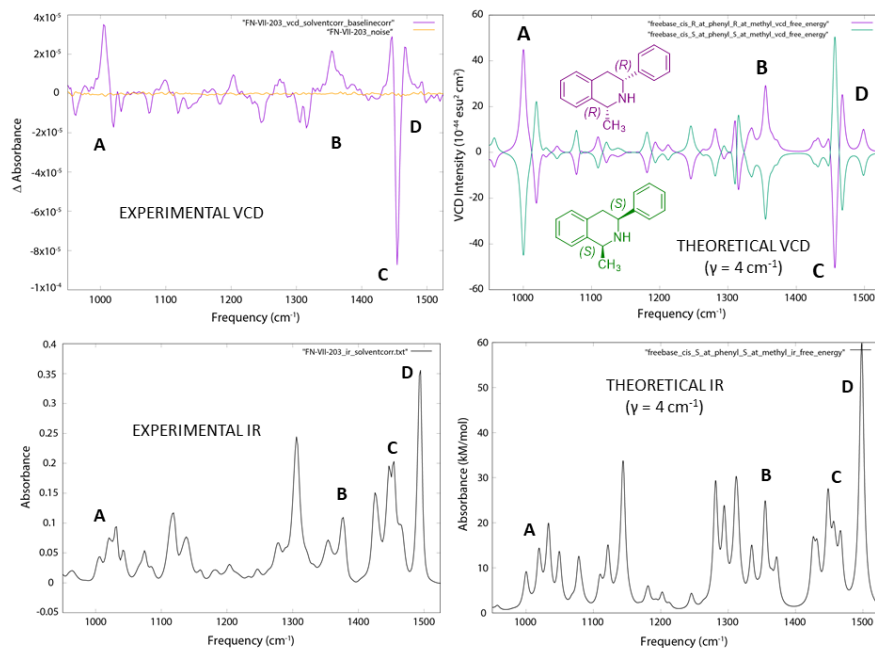

Experimental (left) and computed (right) IR and VCD spectra for the *cis* isomers of **12e**. The better agreement with the (*R,R*) stereoisomer, upon alignment of the achiral IR spectra and correlation to VCD signals, is readily evident.

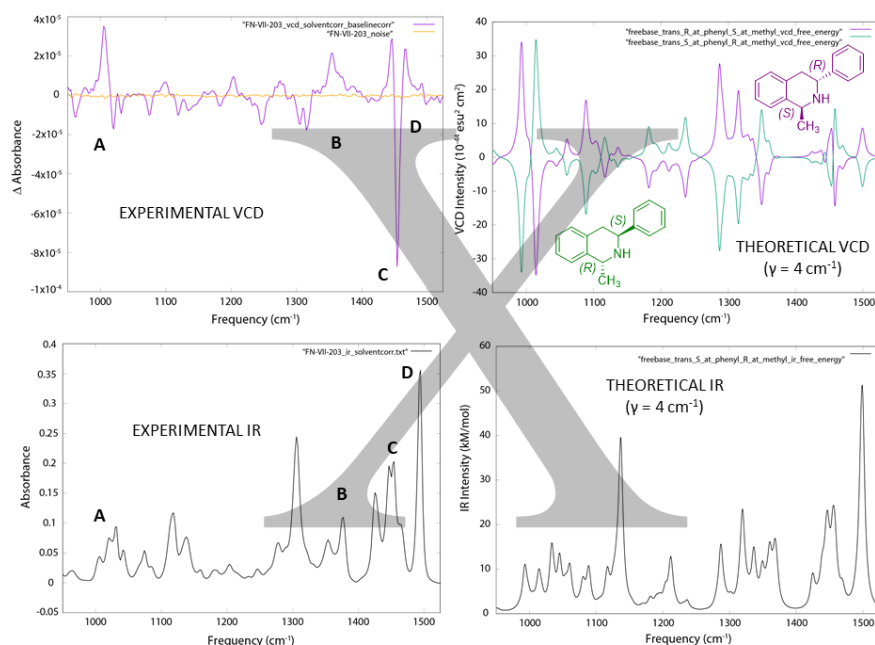

Experimental (left) and computed (right) IR and VCD spectra for the *trans* isomers of **12e**. The worse agreement with experiment between either of the predicted *trans* stereoisomers, compared to the *cis*- and (*R,R*) stereoisomer above, can be seen. This assertion is further supported to an extent by the optical rotation data below.

**Method 2 – Optical Rotation (OR)**

**Computational Protocol.** The ensemble of unique IEFPCM-B3PW91/cc-pVTZ conformers of **12e** generated in Method 1 above were subjected to optical rotation calculation at 589.0 nm using the B3LYP hybrid density functional, the large and diffuse 6-311++G(2df,2pd) basis set, and the IEFPCM implicit chloroform solvent model. The computed IEFPCM-B3LYP/6-311++G(2df,2pd) optical rotations (weighted by IEFPCM-B3PW91/cc-pVTZ free energies at 298.15 K) along with those resulting from alternatively weighting by either the IEFPCM-B3PW91/cc-pVTZ total energies or IEFPCM-B3LYP/6-311++G(2df,2pd)//IEFPCM-B3PW91/cc-pVTZ total energies are reported in (a)-(d) below.

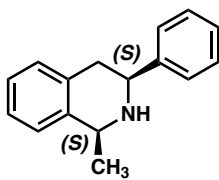

(a)

Predicted optical rotation, weighted by IEFPCM-B3PW91/cc-pVTZ free energies: **-144.5°**

Predicted optical rotations, weighted by IEFPCM-B3PW91/cc-pVTZ total energies: **-144.6°**

Predicted optical rotations, weighted by IEFPCM-B3LYP/6-311++G(2df,2pd)//IEFPCM-B3PW91/cc-pVTZ total energies: **-147.0°**

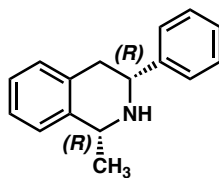

(b)

Predicted optical rotation, weighted by IEFPCM-B3PW91/cc-pVTZ free energies: **+144.5°**

Predicted optical rotations, weighted by IEFPCM-B3PW91/cc-pVTZ total energies: **+144.6°**

Predicted optical rotations, weighted by IEFPCM-B3LYP/6-311++G(2df,2pd)//IEFPCM-B3PW91/cc-pVTZ total energies: **+147.0°**

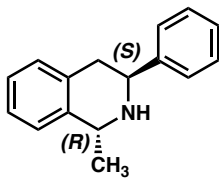

(c)

Predicted optical rotation, weighted by IEFPCM-B3PW91/cc-pVTZ free energies: **-94.5°**

Predicted optical rotations, weighted by IEFPCM-B3PW91/cc-pVTZ total energies: **-101.0°**

Predicted optical rotations, weighted by IEFPCM-B3LYP/6-311++G(2df,2pd)//IEFPCM-B3PW91/cc-pVTZ total energies: **-100.1°**

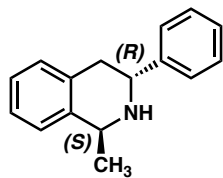

Predicted optical rotation, weighted by IEFPCM-B3PW91/cc-pVTZ free energies: **+94.5°**

Predicted optical rotations, weighted by IEFPCM-B3PW91/cc-pVTZ total energies: **+101.0°**

Predicted optical rotations, weighted by IEFPCM-B3LYP/6-31++G(2df,2pd)//IEFPCM-B3PW91/cc-pVTZ total energies: **+100.1°**

Measured optical rotation:  $[\alpha]_D^{25} +133.3$  ( $c$  0.79,  $\text{CHCl}_3$ )

Assuming only that the *sign* of the optical rotation is correctly predicted by theory, given the experimentally measured value of  $+133.3^\circ$ , the absolute configuration of **12e** must either be: (i) (*R*) at both chiral centers (and therefore *cis*); or (b) (*S*) at phenyl and (*R*) at methyl (*trans*). Scenario (b) is unlikely, given the wrong (opposite) directionality of the VCD signals in regions **C** and **D** of the experimental spectrum. Scenario (a) also gives rise to the best agreement between the predicted and measured VCD spectra.

The individual relative energies, free energies, and optical rotational signatures of each conformer of the *cis* and *trans* stereoisomers are separately provided in the accompanying Microsoft Excel files.

---

**References:**

- <sup>1</sup> Pangborn, A. M.; Giardello, M. A.; Grubbs, R. H.; Rosen, R. K.; Timmers, F. J. Safe and Convenient Procedure for Solvent Purification. *Organometallics*. **1996**, *15*, 1518–1520.
- <sup>2</sup> Pilgrim, B. S.; Gatland, A. E.; Esteves, C. H. A.; McTernan, C. T.; Jones, G. R.; Tatton, M. R.; Procopiou, P. A.; Donohoe, T. J. Palladium-Catalyzed Enolate Arylation as a Key C–C Bond-Forming Reaction for the Synthesis of Isoquinolines. *Org. Biomol. Chem.* **2016**, *14*, 1065–1090.
- <sup>3</sup> Allan, K. M.; Hong, B. D.; Stoltz, B. M. Expedient Synthesis of 3-Hydroxyisoquinolines and 2-Hydroxy-1,4-Naphthoquinones *via* One-Pot Aryne Acyl-Alkylation/Condensation. *Org. Biomol. Chem.* **2009**, *7*, 4960–4964.
- <sup>4</sup> Bruno, N. C.; Tudge, M. T.; Buchwald, S. L. Design and Preparation of New Palladium Precatalysts for C–C and C–N Cross-Coupling Reactions. *Chem. Sci.* **2013**, *4*, 916–920.
- <sup>5</sup> Welin, E. R.; Ngamnithiporn, A.; Klatte, M.; Lapointe, G.; Pototschnig, G. M.; McDermott, M. S. J.; Conklin, D.; Gilmore, C. D.; Tadross, P. M.; Haley, C. K.; Negoro, K.; Glibstrup, E.; Grünanger, C. U.; Allan, K. M.; Virgil, S. C.; Slamon, D. J.; Stoltz, B. M. Concise Total Syntheses of (–)-Jorunnamycin A and (–)-Jorumycin Enabled by Asymmetric Catalysis. *Science*. **2019**, *363*, 270–275.
- <sup>6</sup> Legault, C. Y.; Charette, A. B. Catalytic Asymmetric Hydrogenation of *N*-Iminopyridinium Ylides: Expedient Approach to Enantioenriched Substituted Piperidine Derivatives. *J. Am. Chem. Soc.* **2005**, *127*, 8966–8967.
- <sup>7</sup> Xu, Z.; Xu, X.; O’Laoi, R.; Ma, H.; Zheng, J.; Chen, S.; Luo, L.; Hu, Z.; He, S.; Li, J.; Zhang, H.; Zhang, X. Design, Synthesis, and Evaluation of Novel Porcupine Inhibitors Featuring a Fused 3-Ring System Based on the “Reversed” Amide Scaffold. *Bioorg. Med. Chem.* **2016**, *24*, 5861–5872.

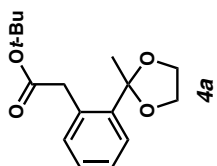

7.51  
7.49  
7.49  
7.48  
7.19  
7.19  
7.18  
7.17  
7.17  
7.16  
7.15  
7.13  
7.12  
7.11  
7.10  
3.91  
3.90  
3.89  
3.89  
3.89  
3.88  
3.88  
3.63  
3.62  
3.62  
3.61  
1.60  
1.60  
1.39  
1.39

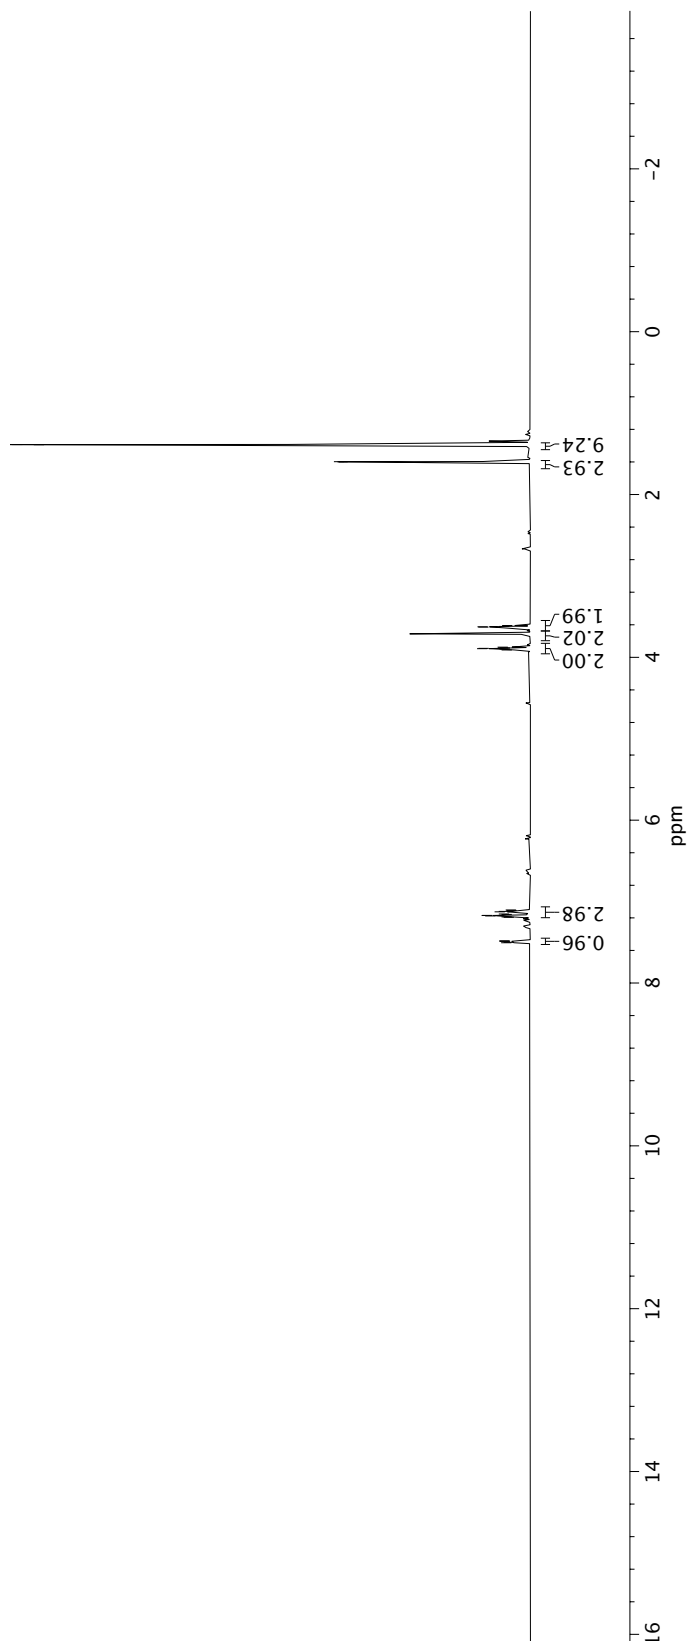



<sup>1</sup>H NMR (400 MHz, CDCl<sub>3</sub>) of compound **4b**.

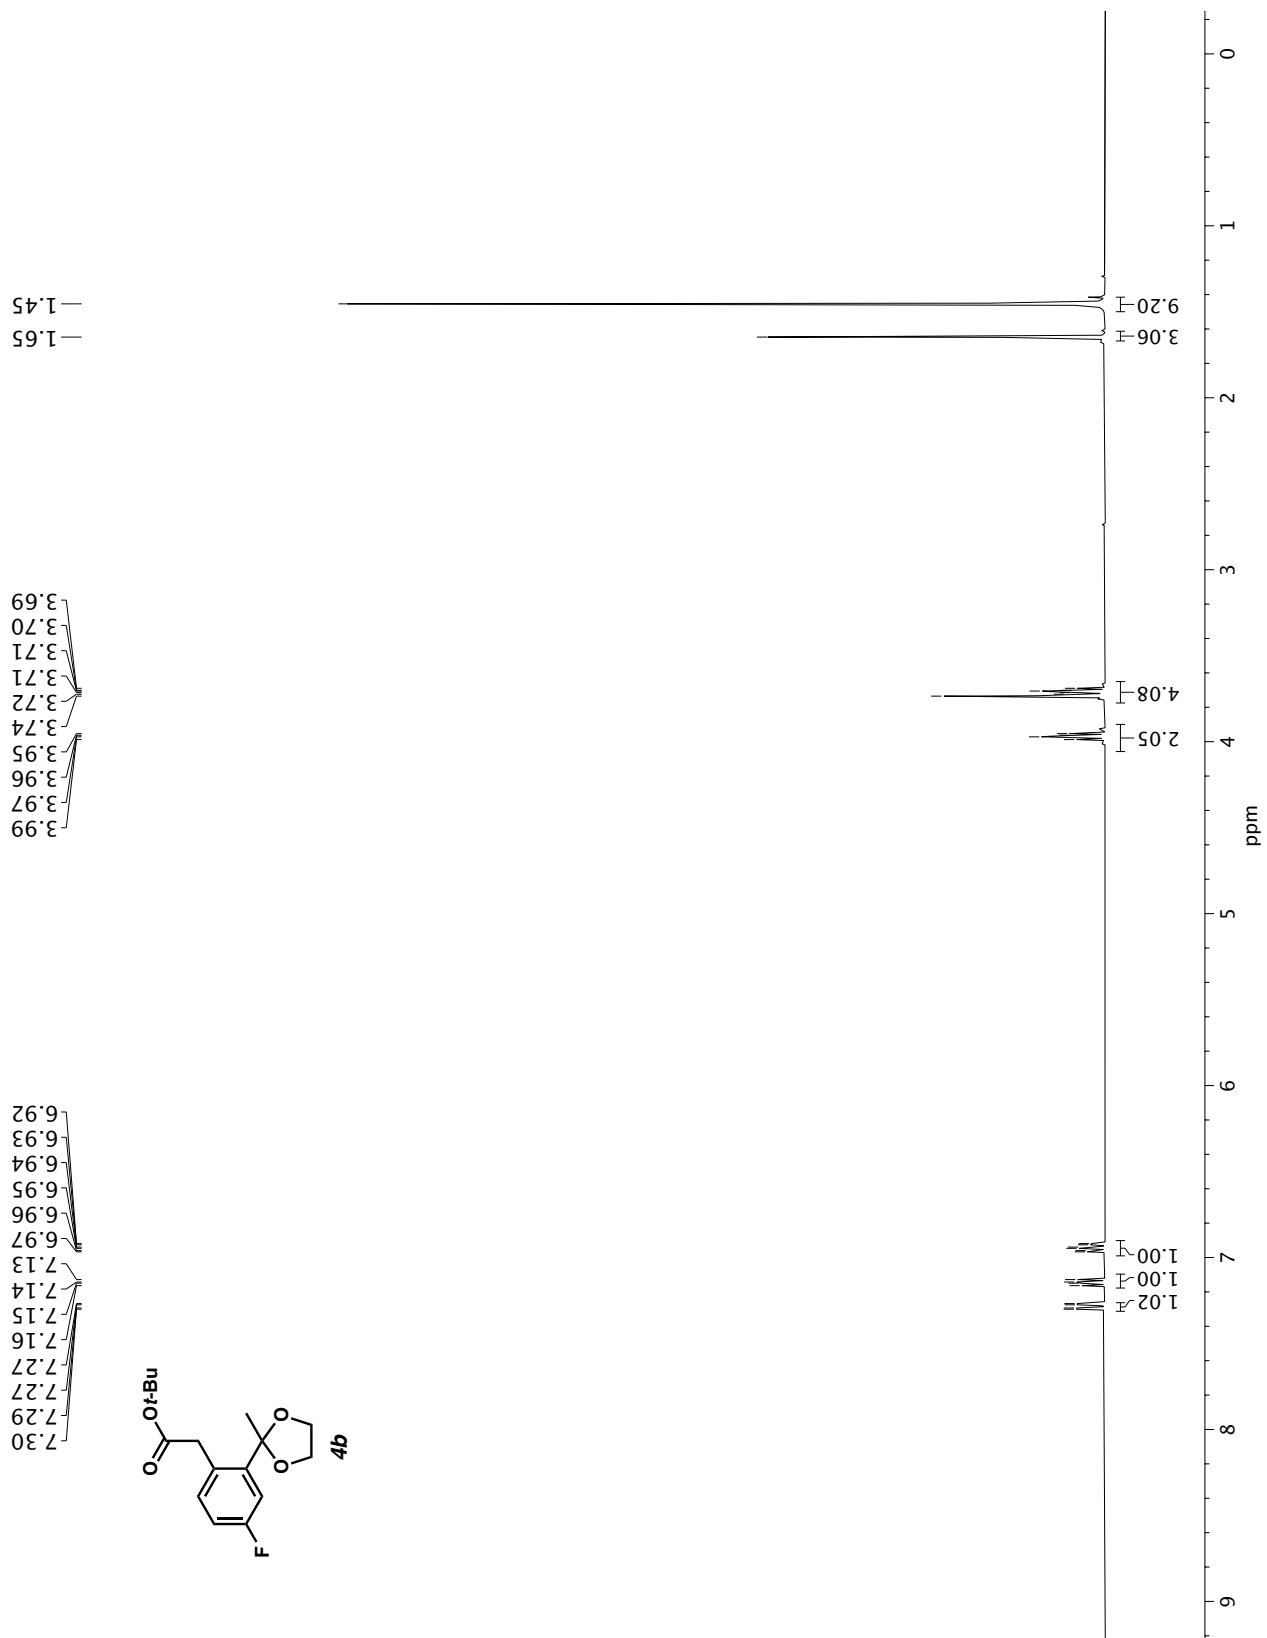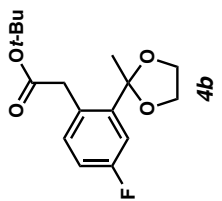



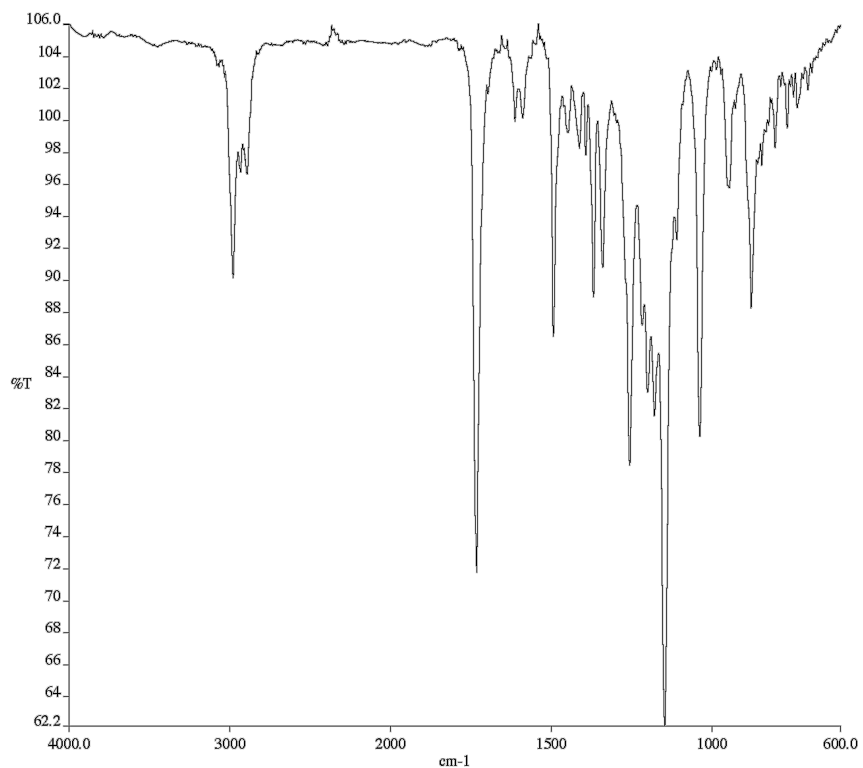

Infrared spectrum (Thin Film, NaCl) of compound **4b**.

—171.49      —163.12      —160.68      —143.88      —143.82      —134.26      —134.19      —127.93      —127.90      —114.99      —114.78      —113.60      —113.38      —108.58      —80.60      —64.43      —39.56      —28.21      —27.30

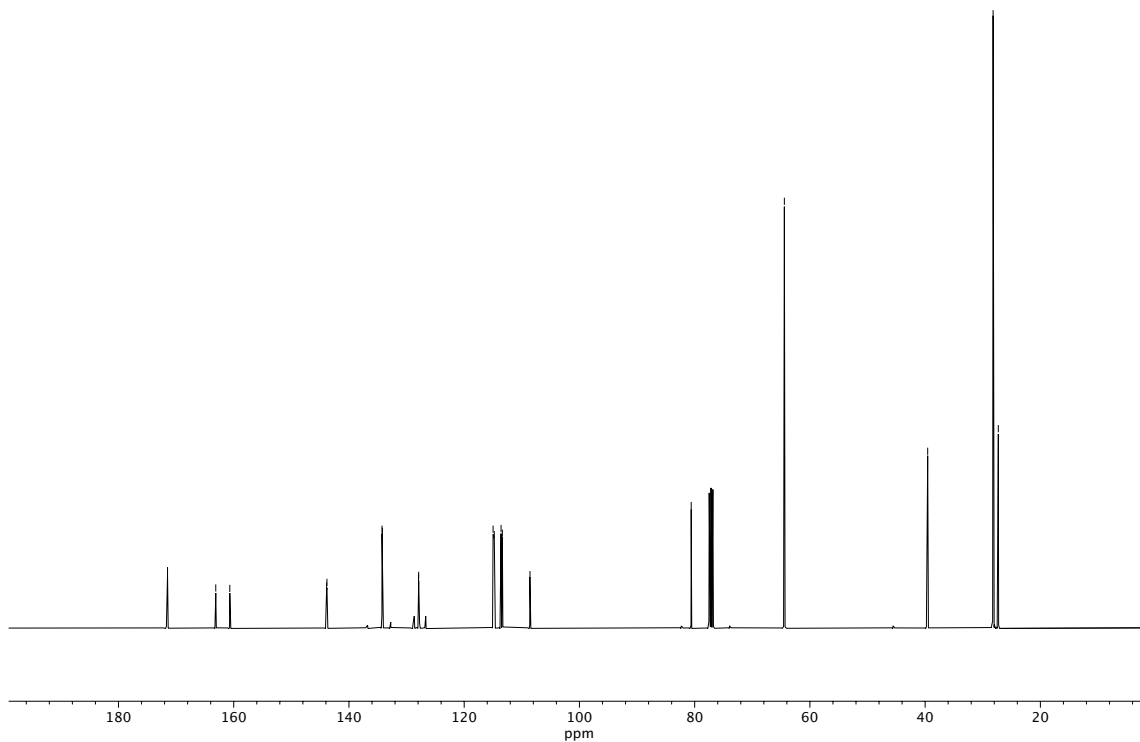

$^{13}\text{C}$  NMR (100 MHz,  $\text{CDCl}_3$ ) of compound **4b**.

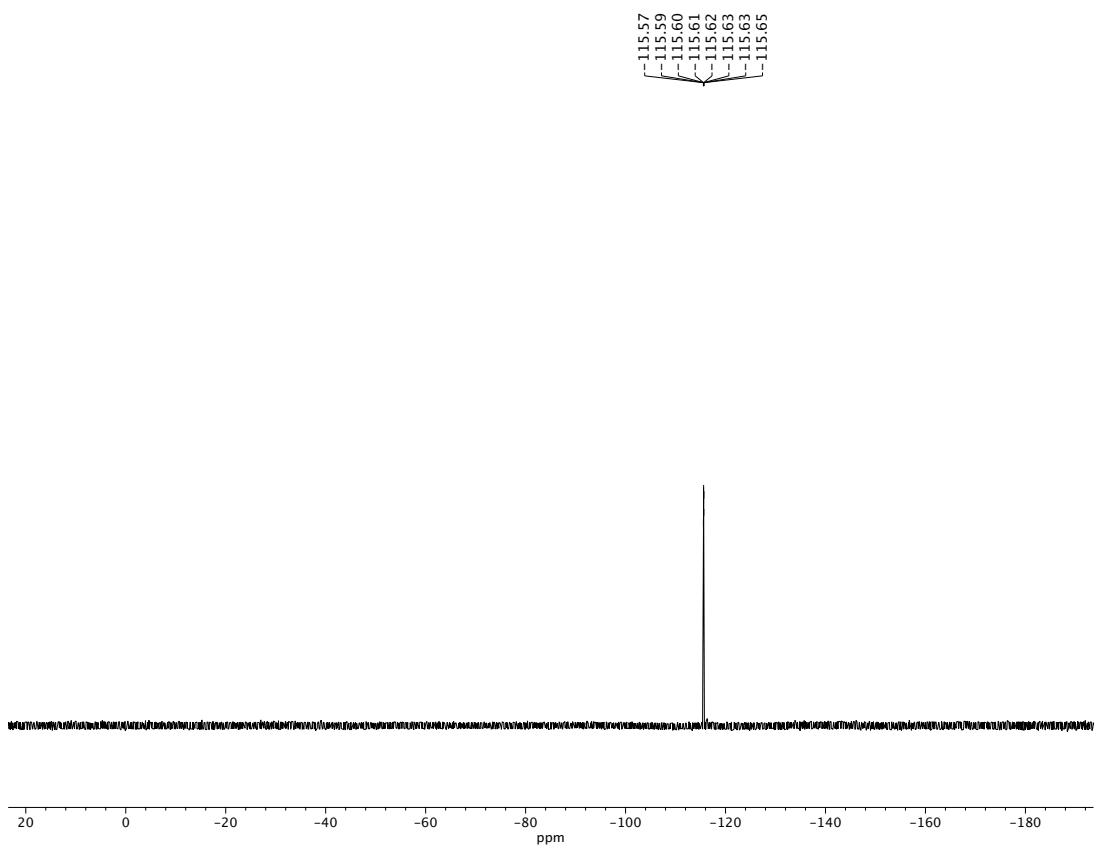

$^{19}\text{F}$  NMR (282 MHz,  $\text{CDCl}_3$ ) of **4b**.

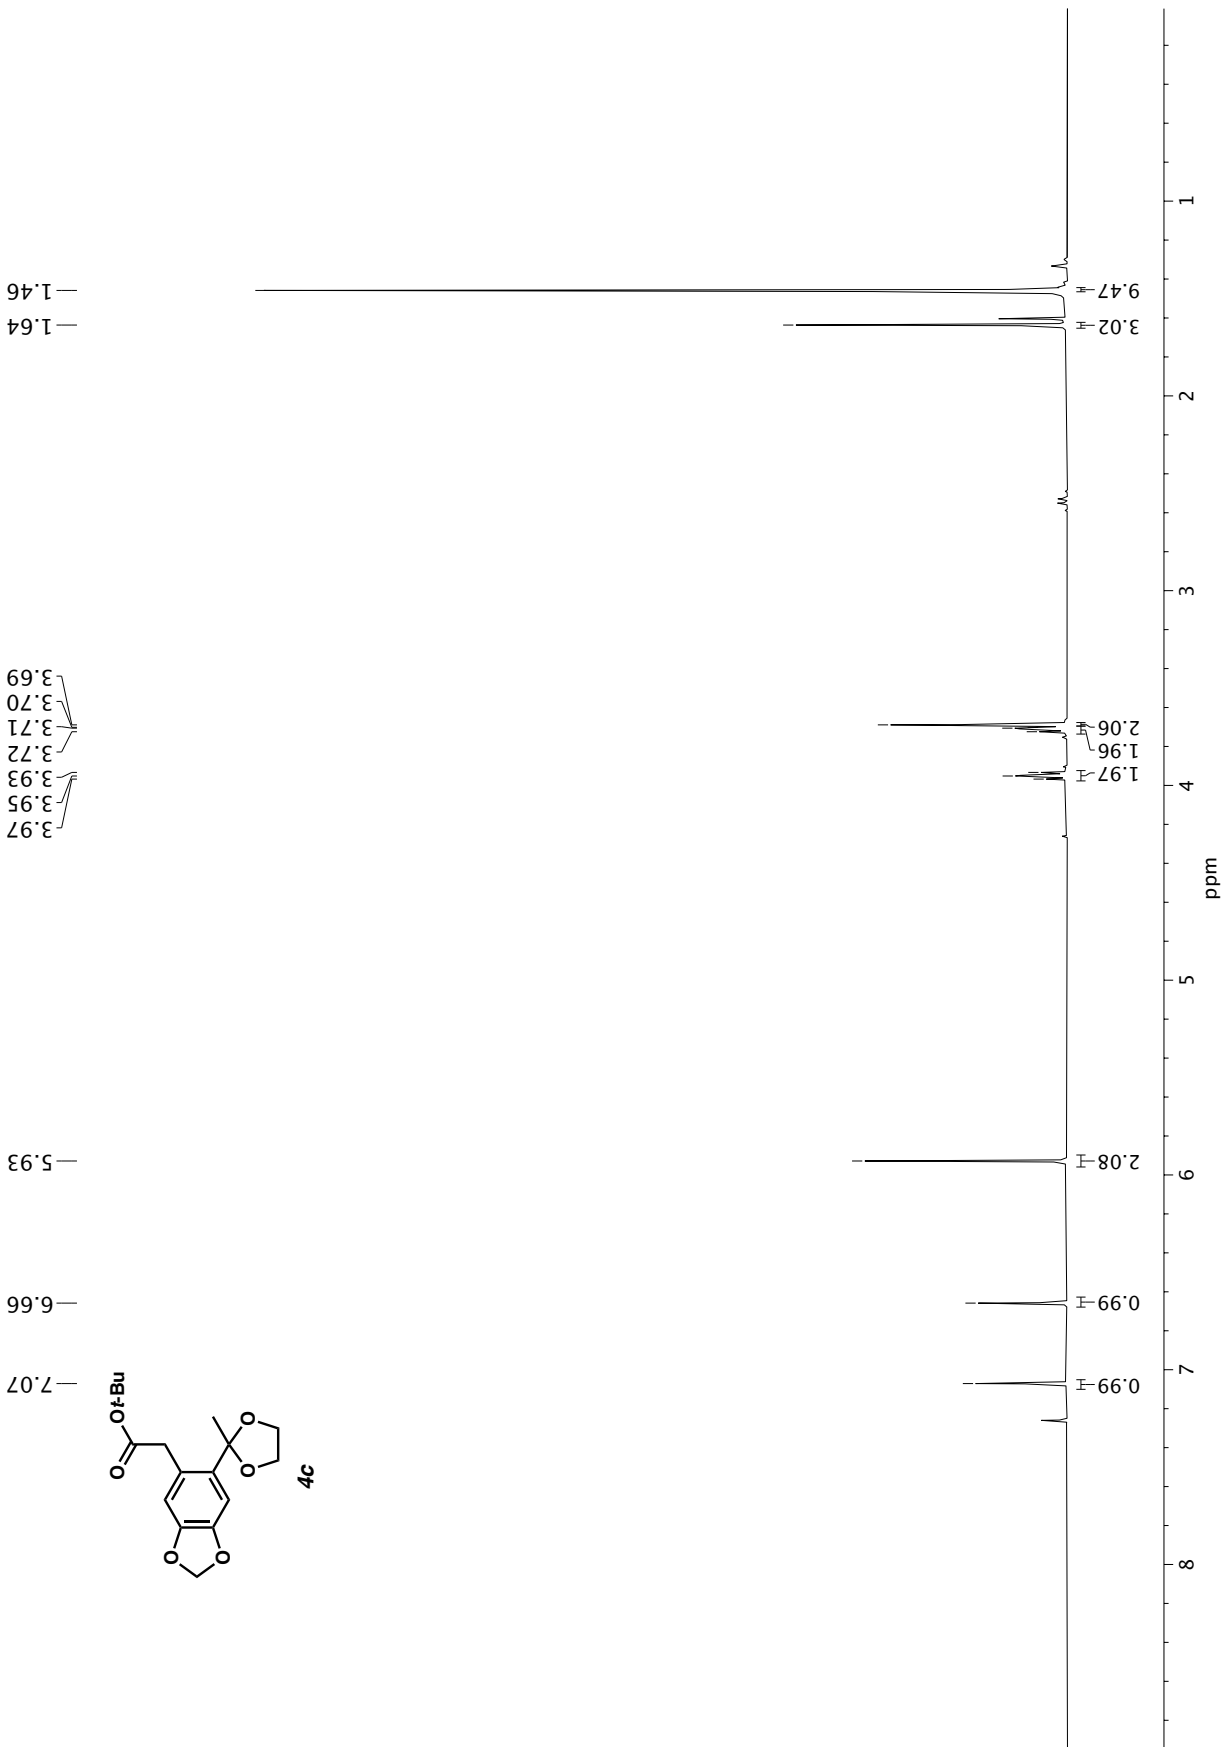

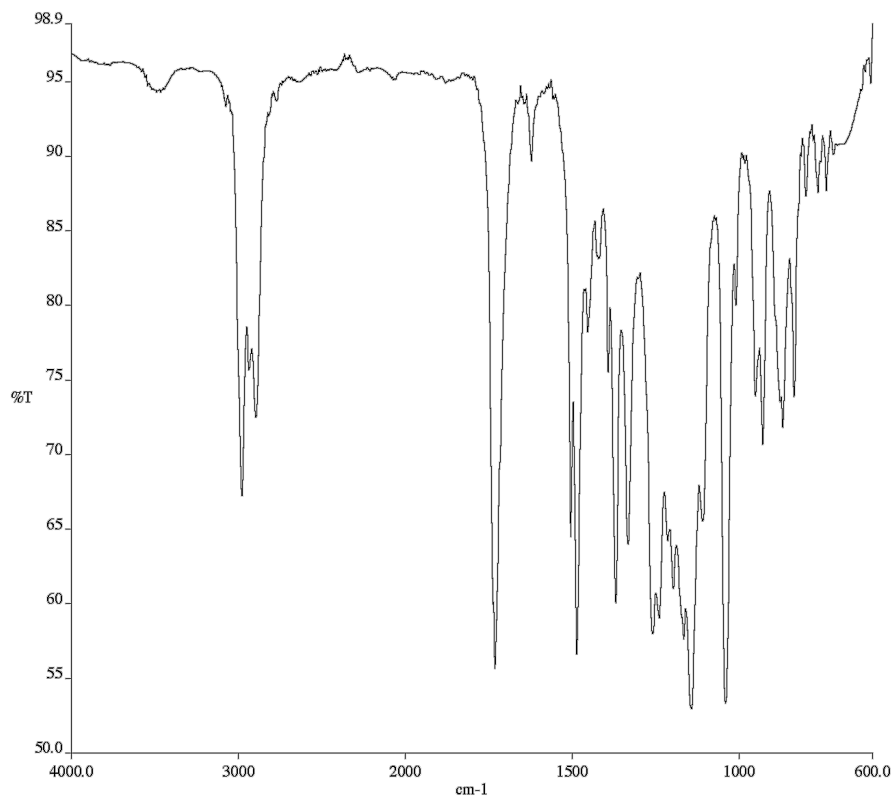

Infrared spectrum (Thin Film, NaCl) of compound **4c**.

—171.74  
—147.22  
—146.71  
—135.23  
—125.91  
—112.32  
—109.05  
—106.95  
—101.26  
—80.55  
—64.31  
—40.03  
—28.25  
—27.60

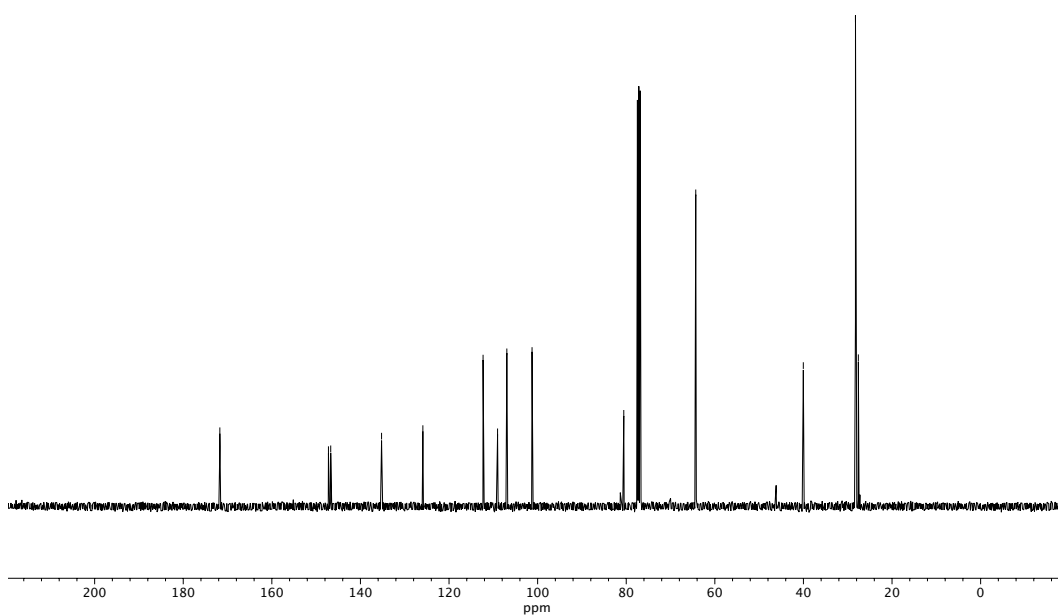

<sup>13</sup>C NMR (100 MHz, CDCl<sub>3</sub>) of compound **4c**.

<sup>1</sup>H NMR (400 MHz, CDCl<sub>3</sub>) of compound **4d**.

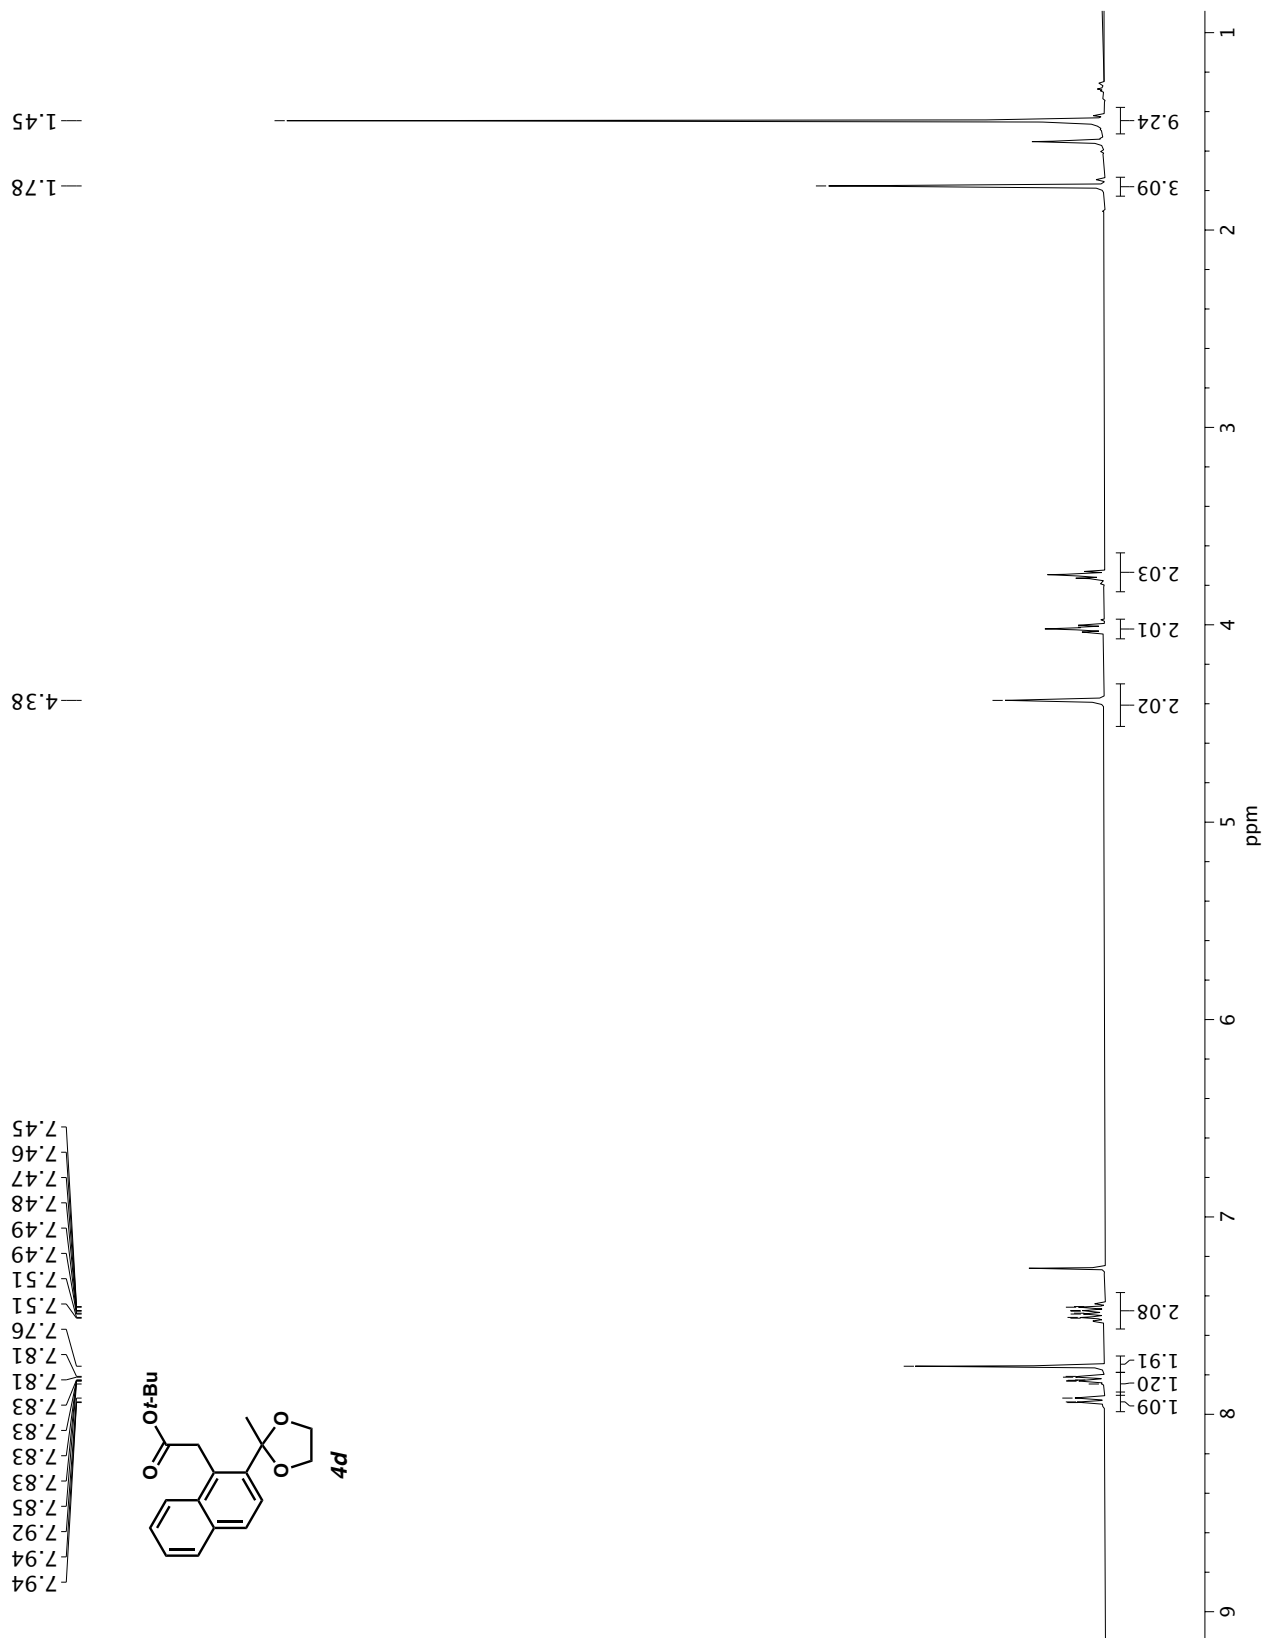

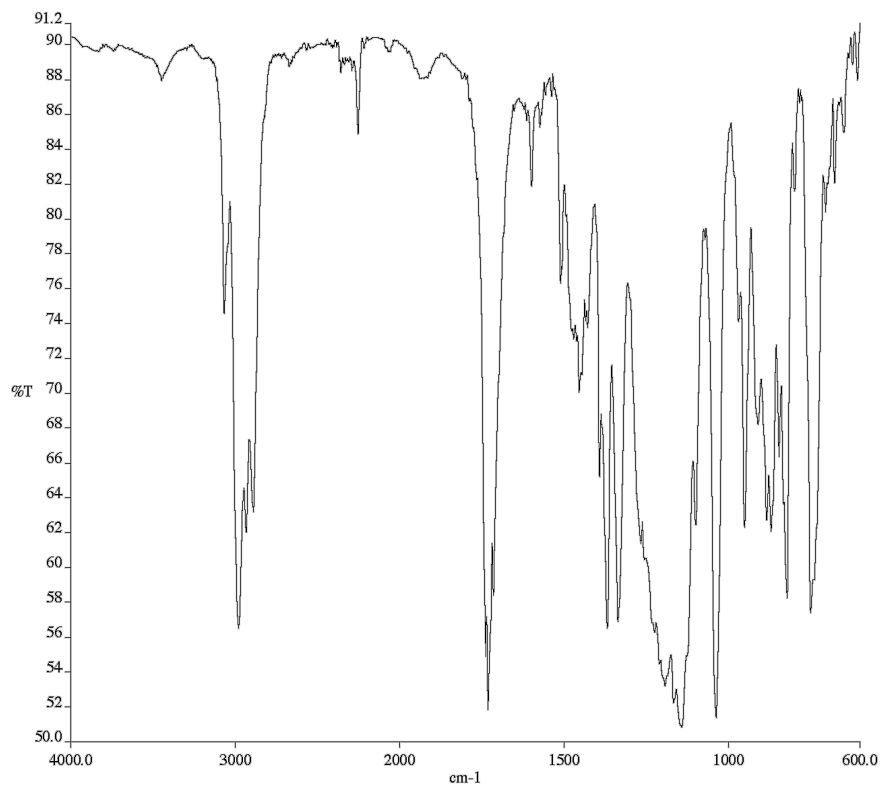

Infrared spectrum (Thin Film, NaCl) of compound **4d**.

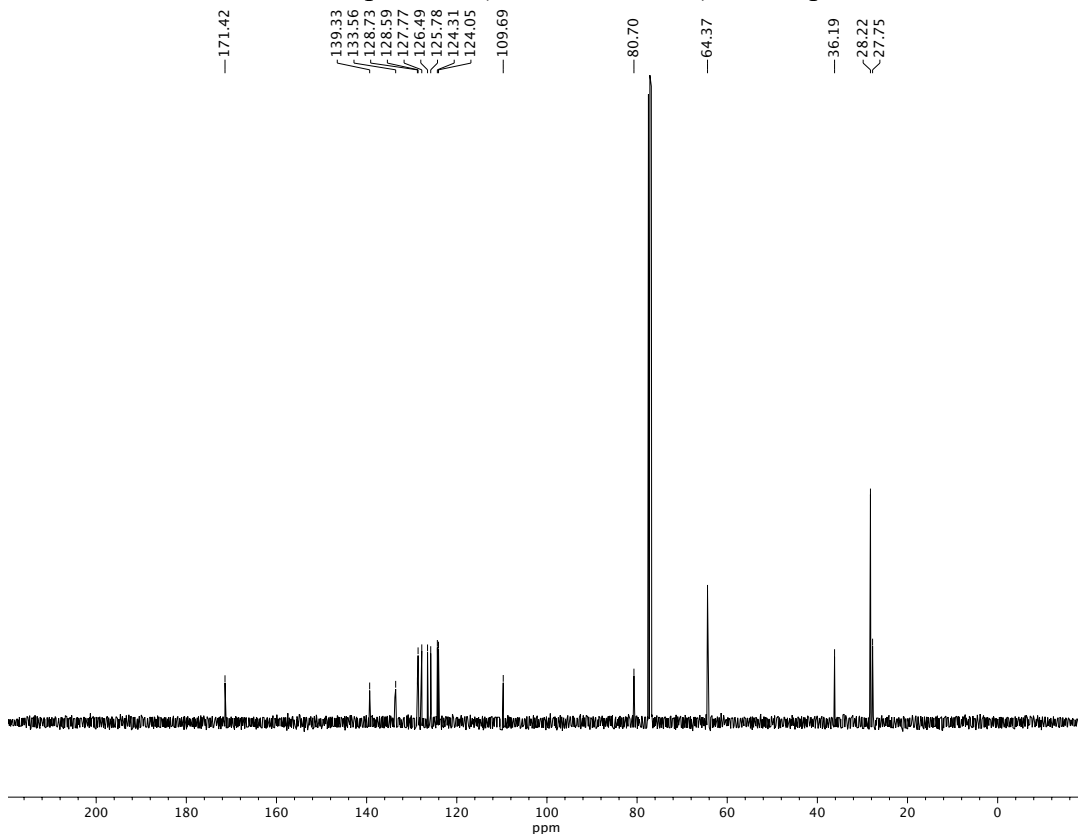

<sup>13</sup>C NMR (100 MHz, CDCl<sub>3</sub>) of compound **4d**.

<sup>1</sup>H NMR (400 MHz, CDCl<sub>3</sub>) of **5a**.

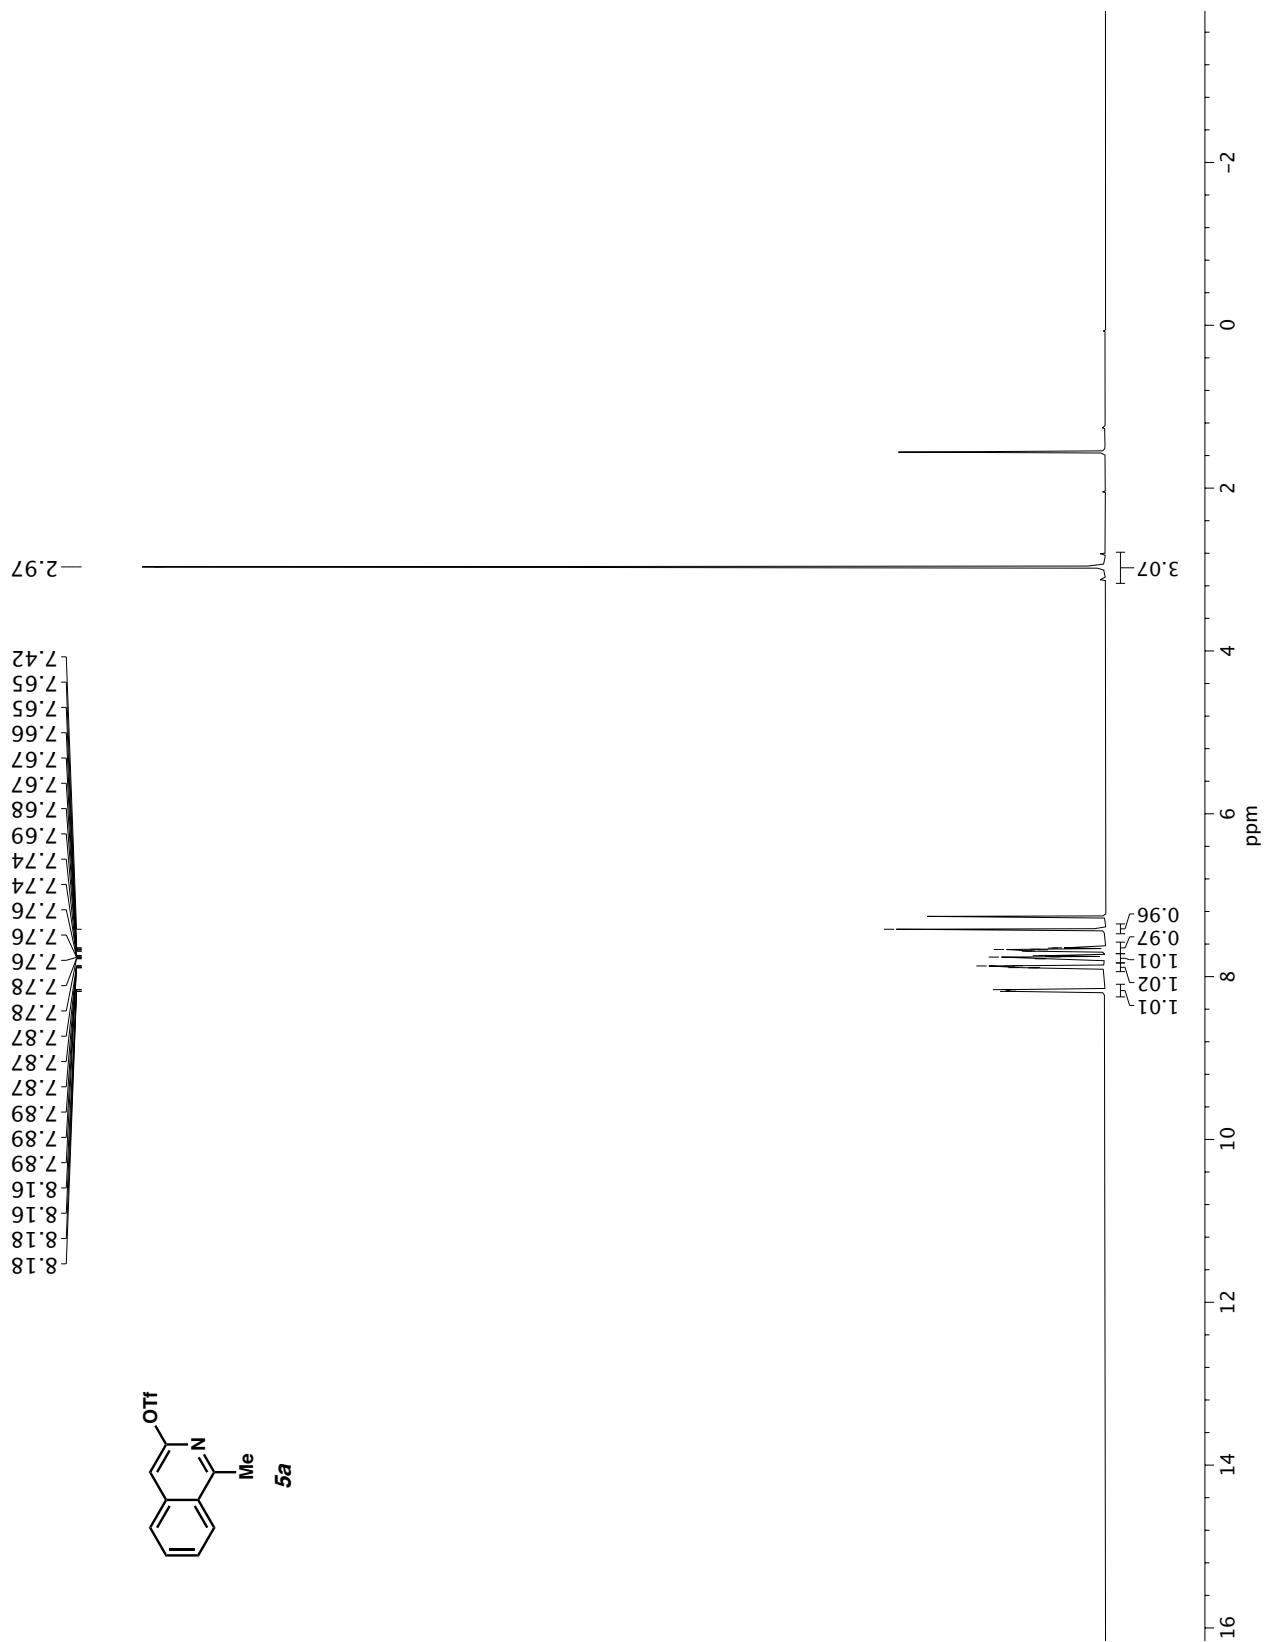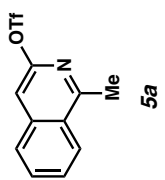

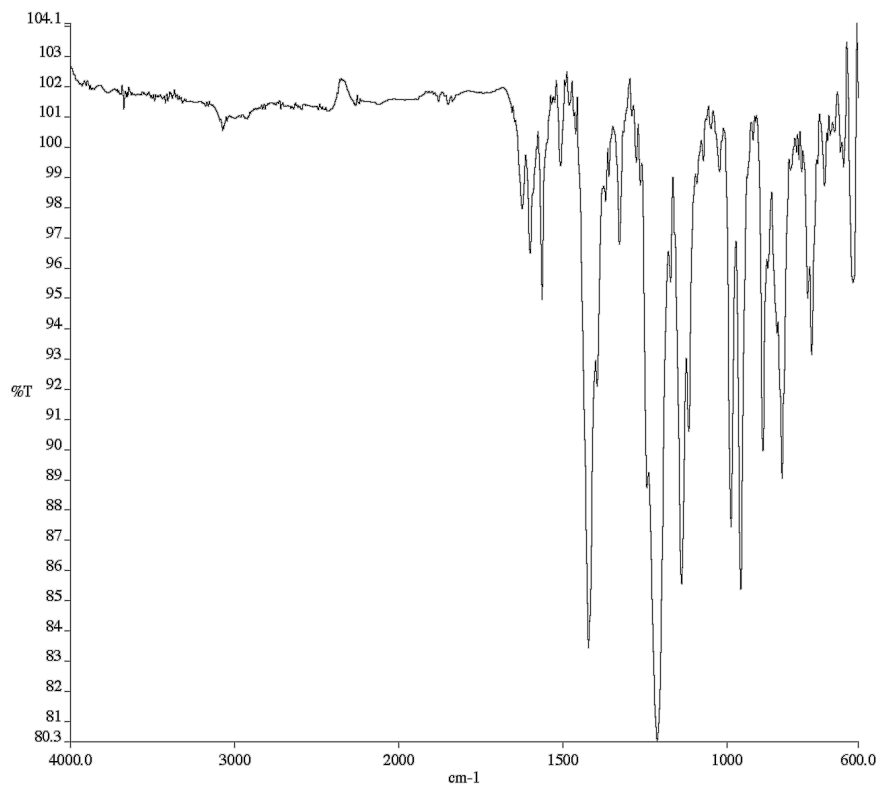

Infrared spectrum (Thin Film, NaCl) of **5a**.

—160.26 —151.32 —138.56 —131.47 —128.14 —127.77 —127.63 —126.13 —123.68 —120.50 —117.32 —114.14 —108.97 —22.14

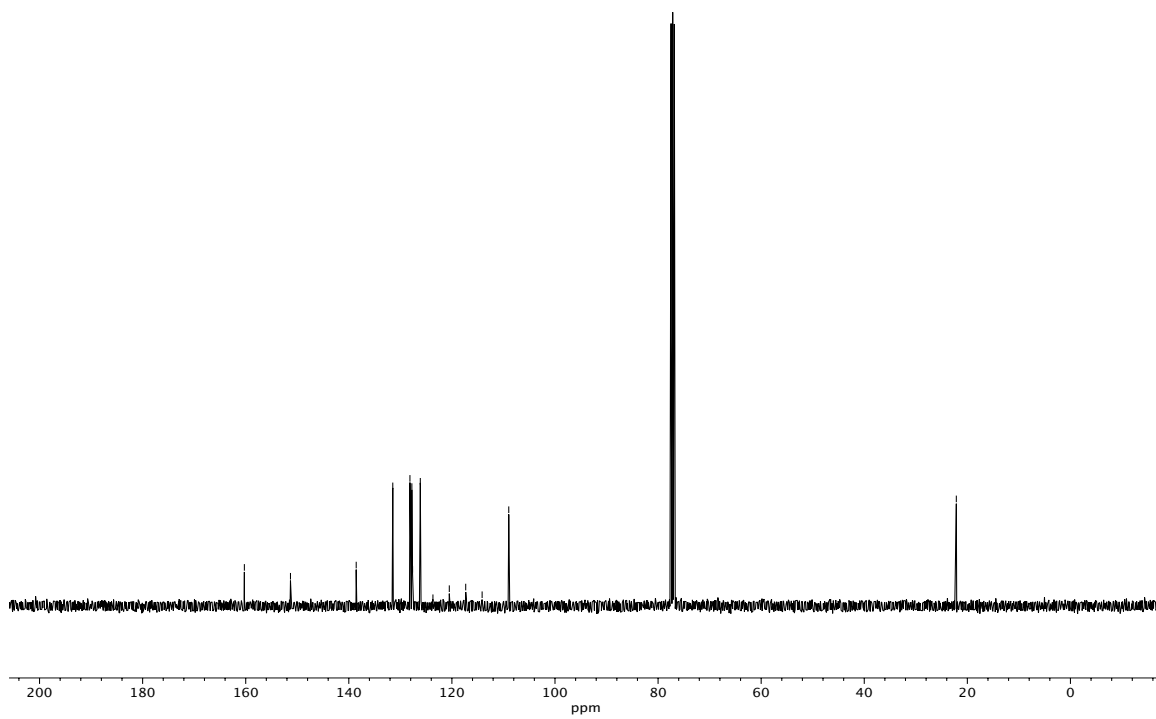

<sup>13</sup>C NMR (100 MHz, CDCl<sub>3</sub>) of **5a**.



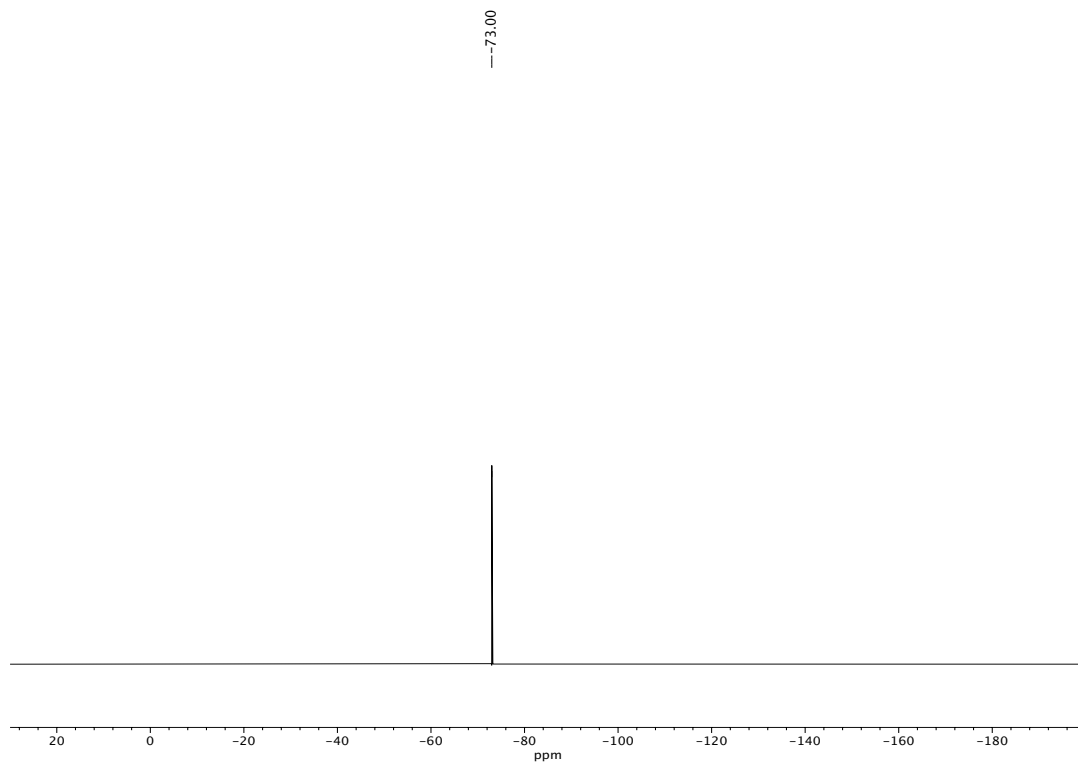

$^{19}\text{F}$  NMR (282 MHz,  $\text{CDCl}_3$ ) of **5a**.

7.92  
7.91  
7.90  
7.88  
7.78  
7.77  
7.75  
7.75  
7.58  
7.57  
7.56  
7.56  
7.55  
7.55  
7.54  
7.53  
7.43

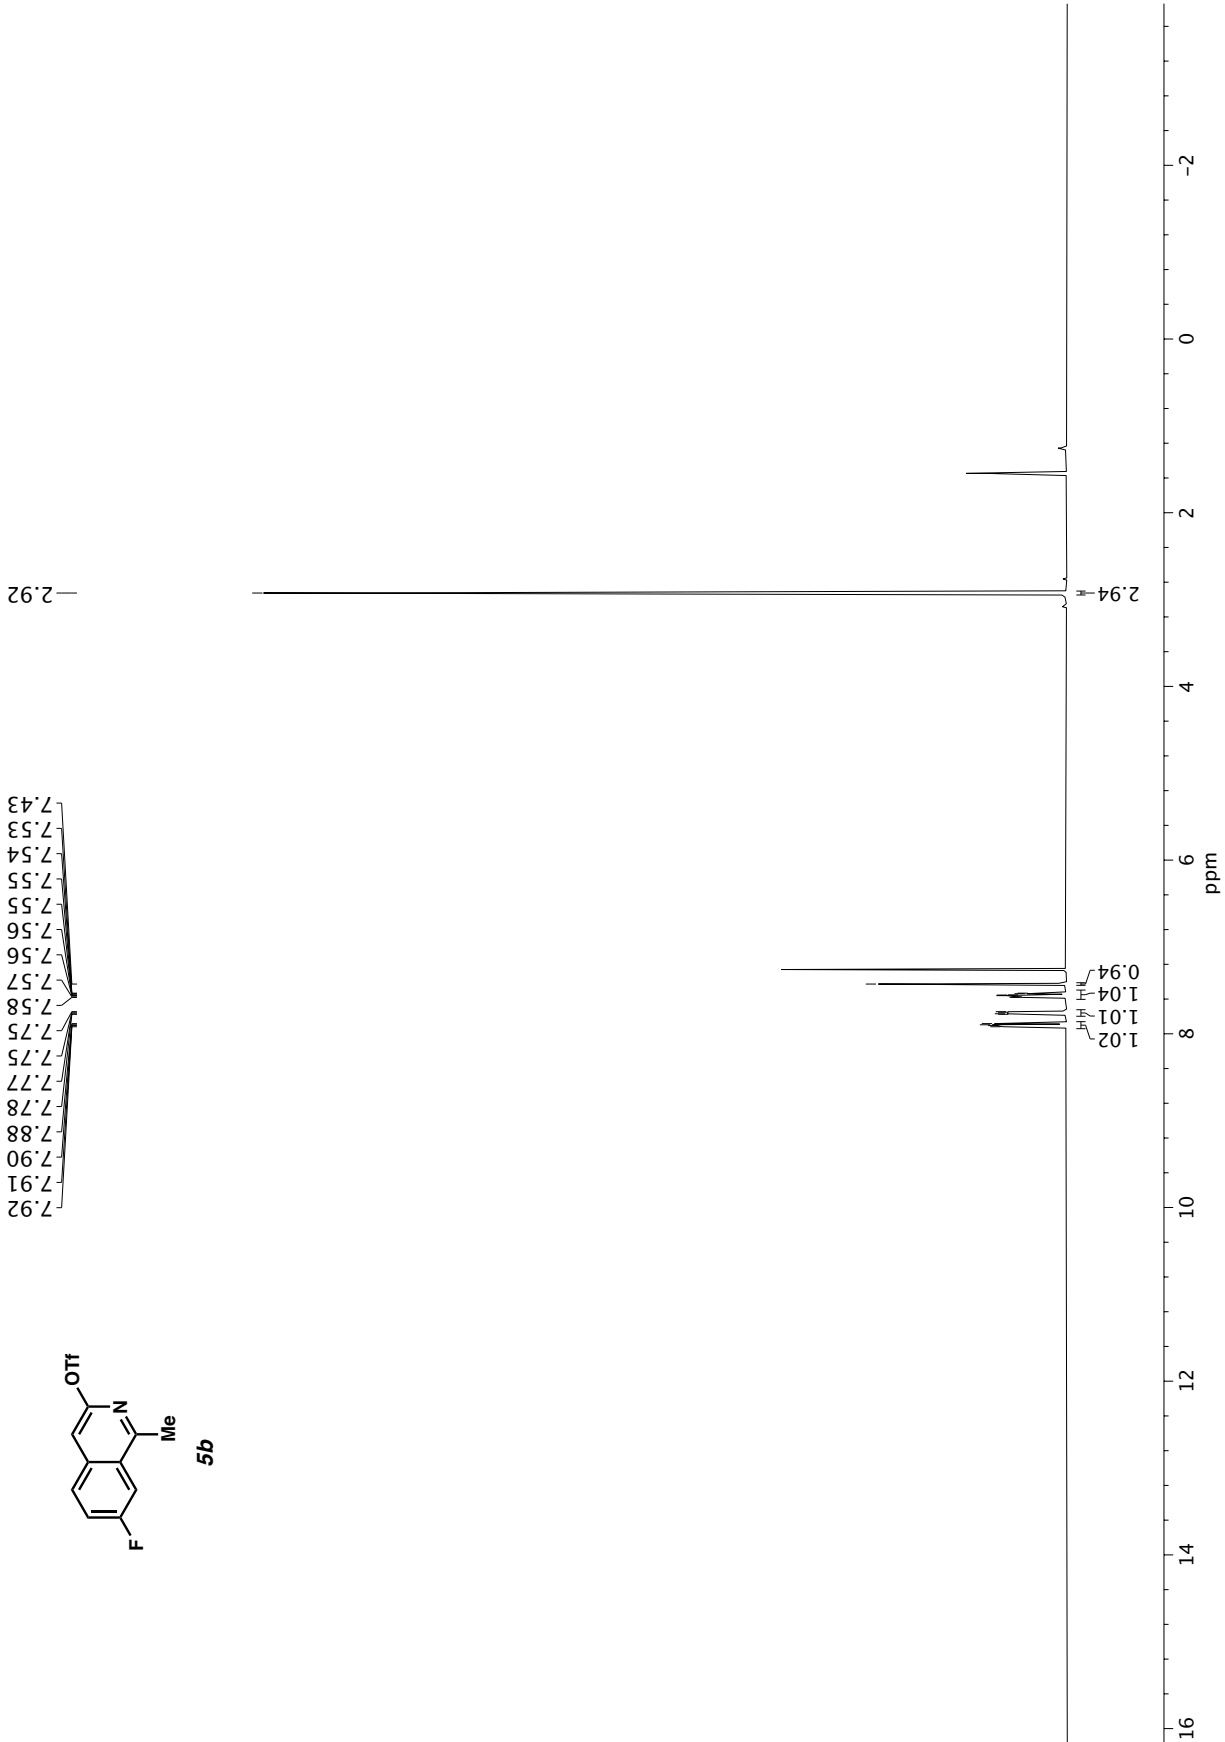

<sup>1</sup>H NMR (400 MHz, CDCl<sub>3</sub>) of **5b**.

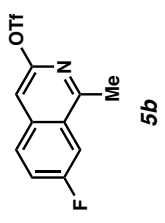

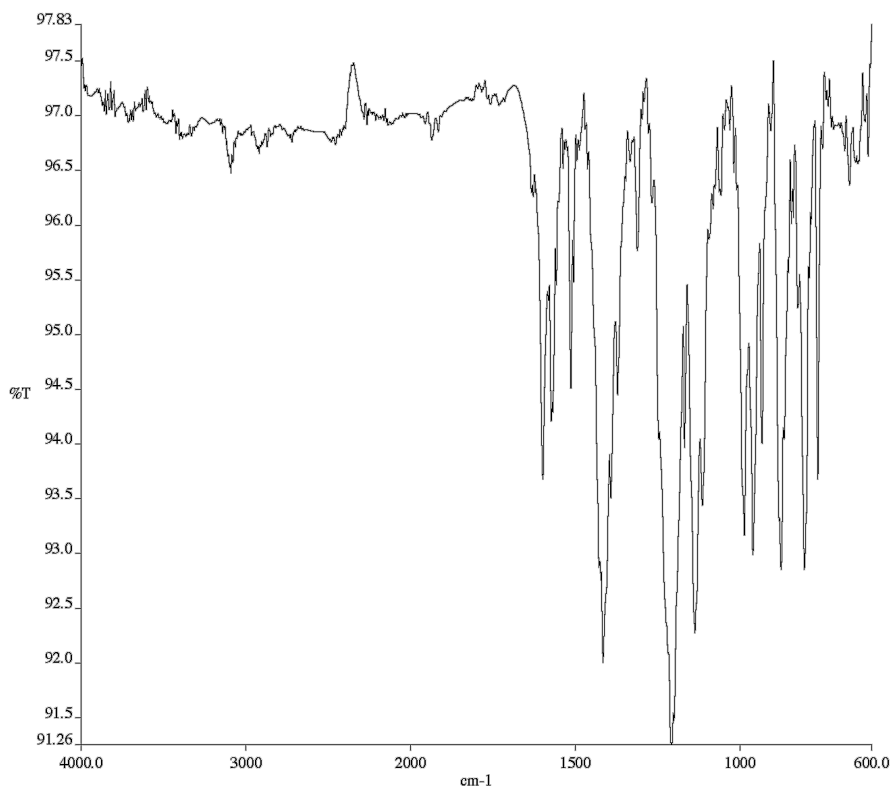

Infrared spectrum (Thin Film, NaCl) of **5b**.

- 162.60
- 160.10
- 159.44
- 159.38
- 151.10
- 151.07
- 135.46
- 130.31
- 130.23
- 128.53
- 128.44
- 123.67
- 122.33
- 122.07
- 120.49
- 117.30
- 114.11
- 109.95
- 109.73
- 108.93
- 108.91

—22.14

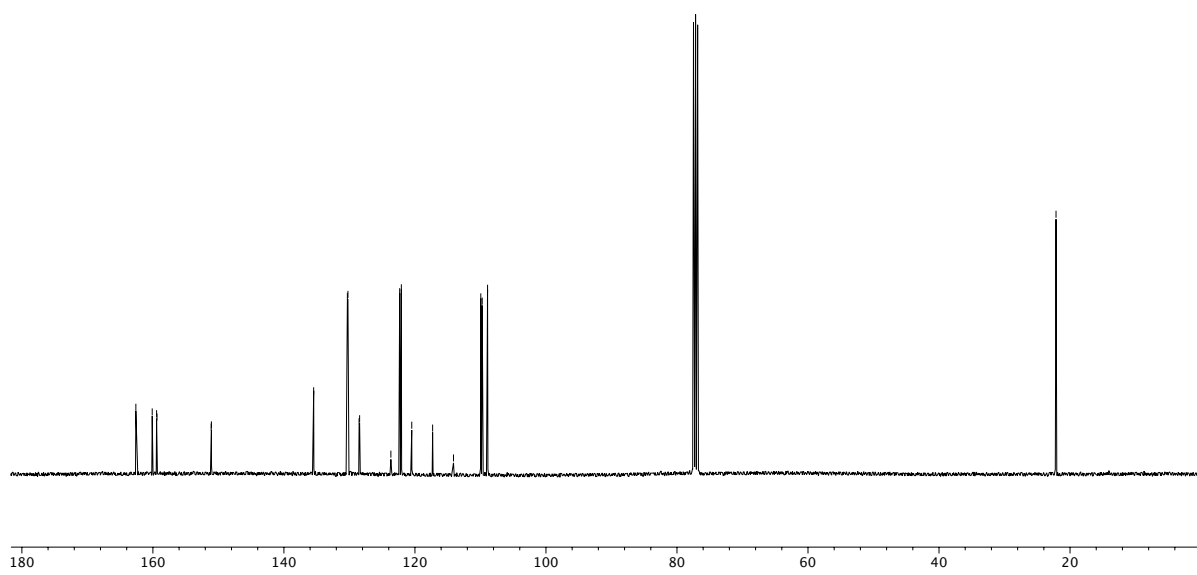

<sup>13</sup>C NMR (100 MHz, CDCl<sub>3</sub>) of **5b**.

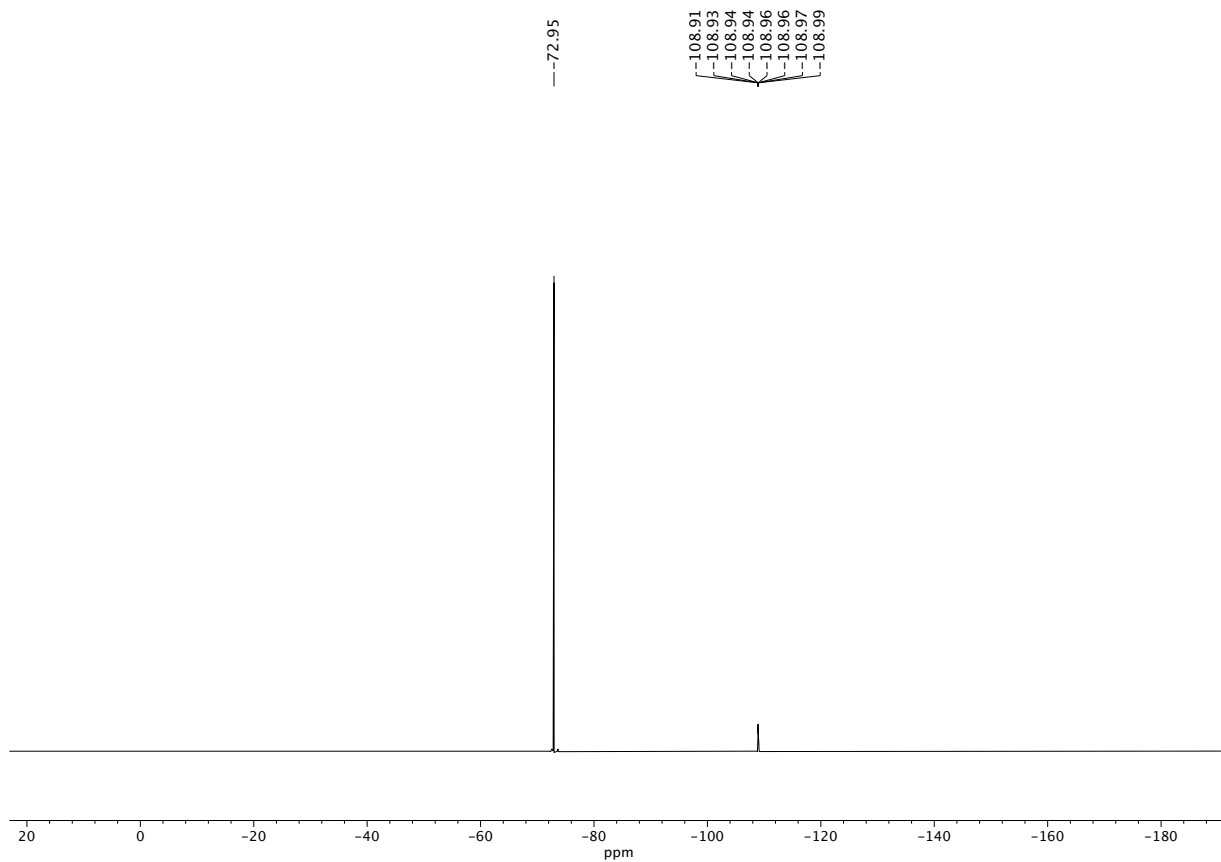

$^{19}\text{F}$  NMR (282 MHz, CDCl<sub>3</sub>) of **5b**.

7.35  
7.35  
7.23  
7.10  
6.15  
2.82

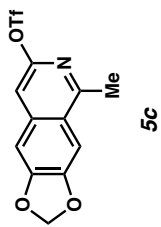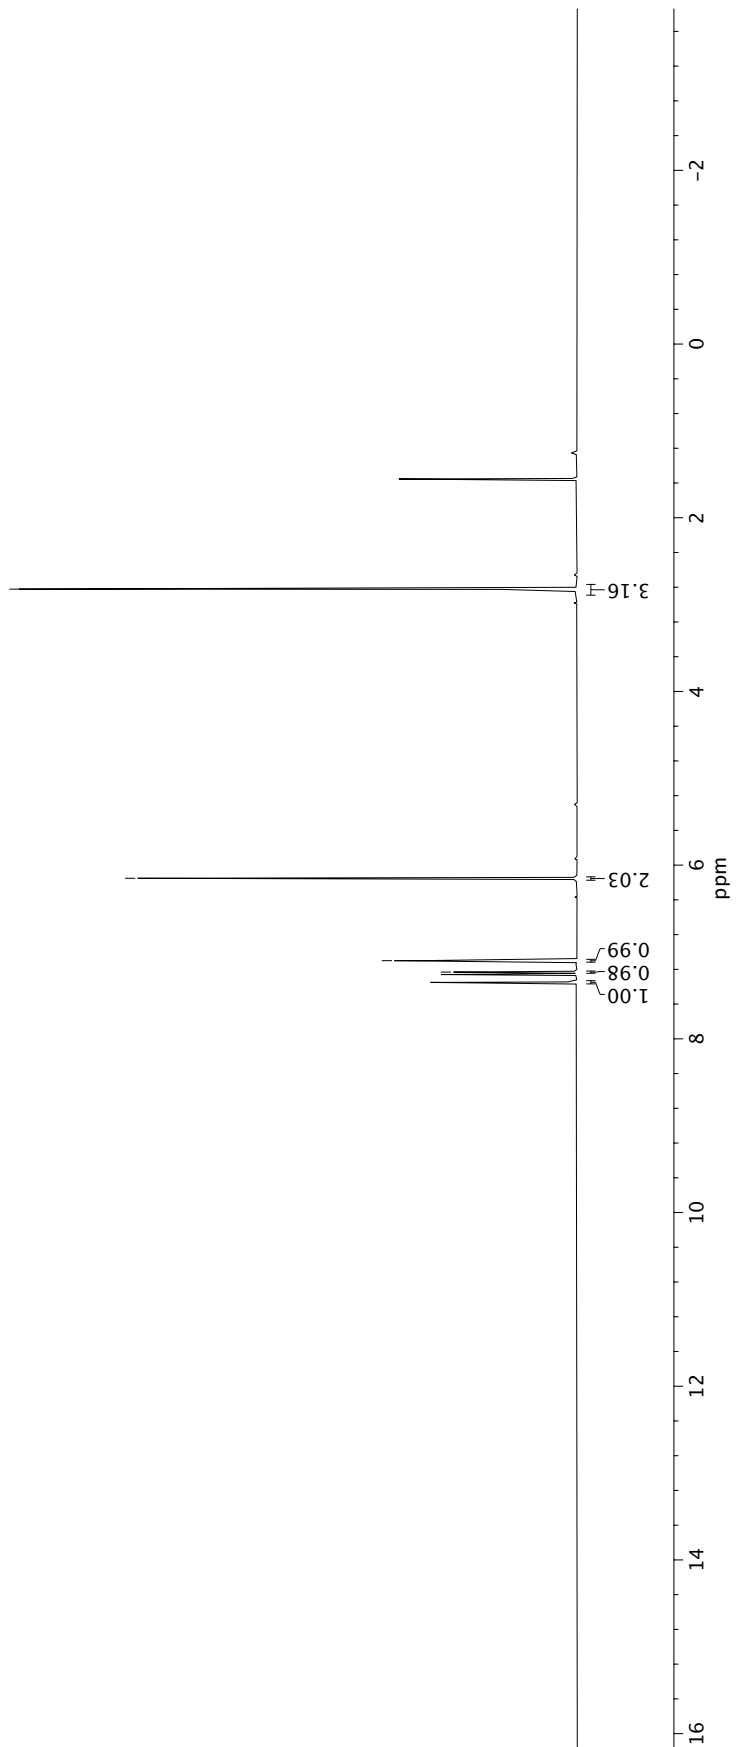

<sup>1</sup>H NMR (400 MHz, CDCl<sub>3</sub>) of **5c**.

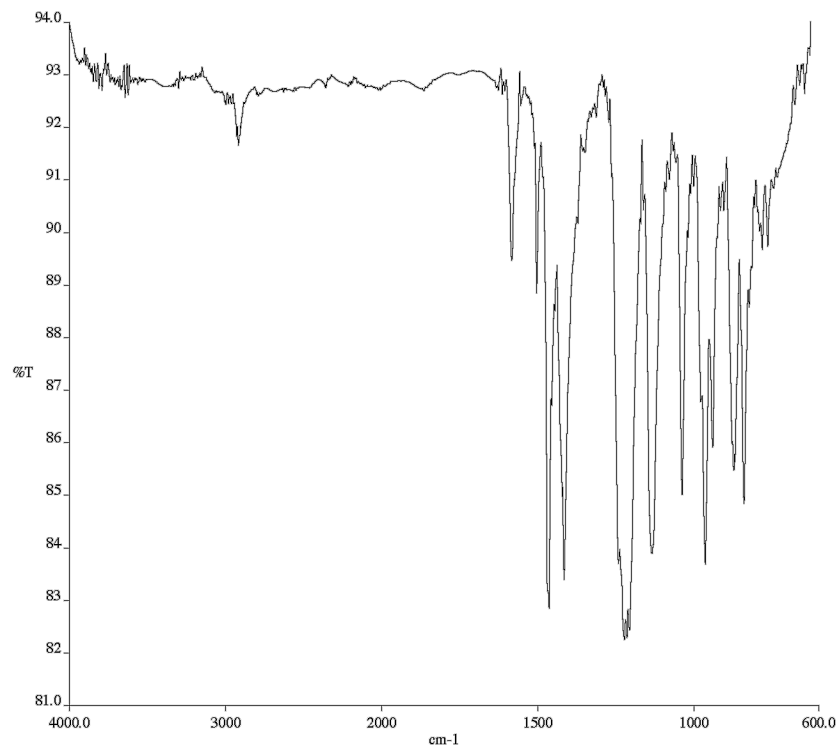

Infrared spectrum (Thin Film, NaCl) of **5c**.

156.87  
151.87  
150.92  
149.24

137.26

124.76  
123.53  
120.34  
117.16  
113.94

108.40  
103.26  
102.23  
101.80

22.22

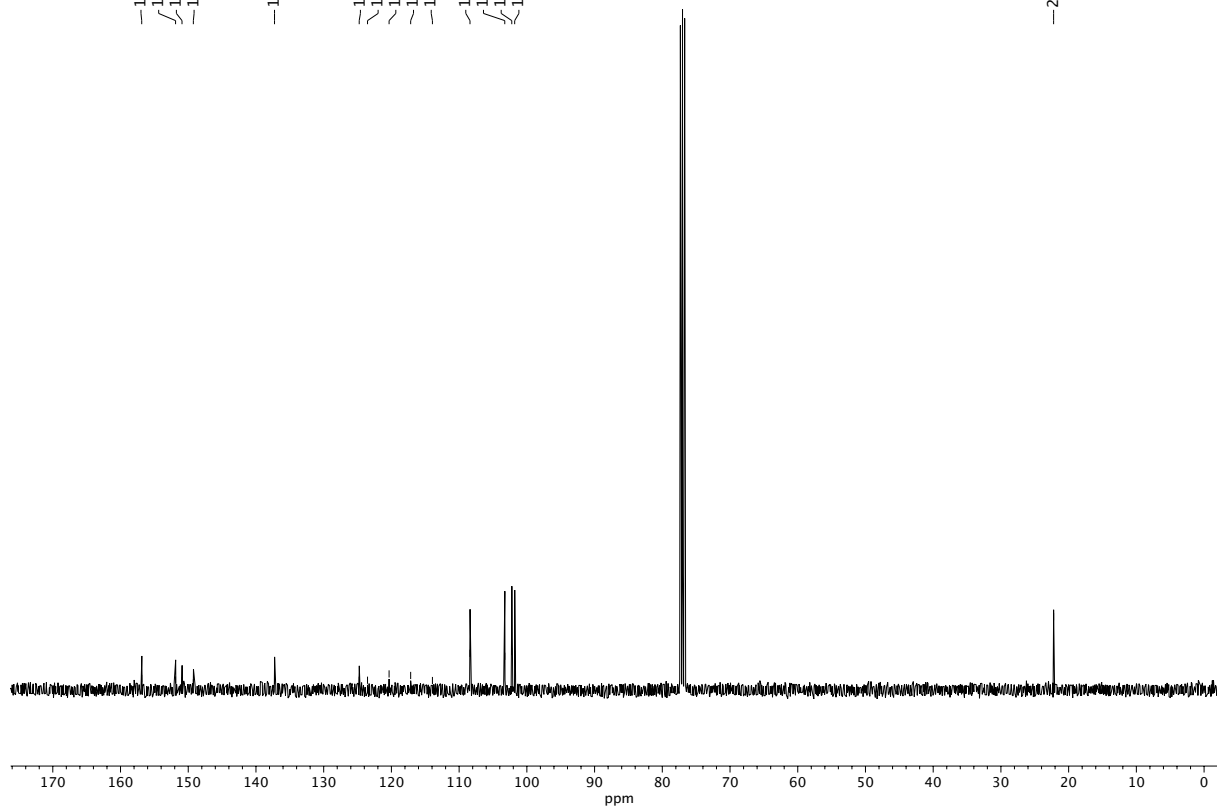

$^{13}\text{C}$  NMR (100 MHz,  $\text{CDCl}_3$ ) of **5c**.

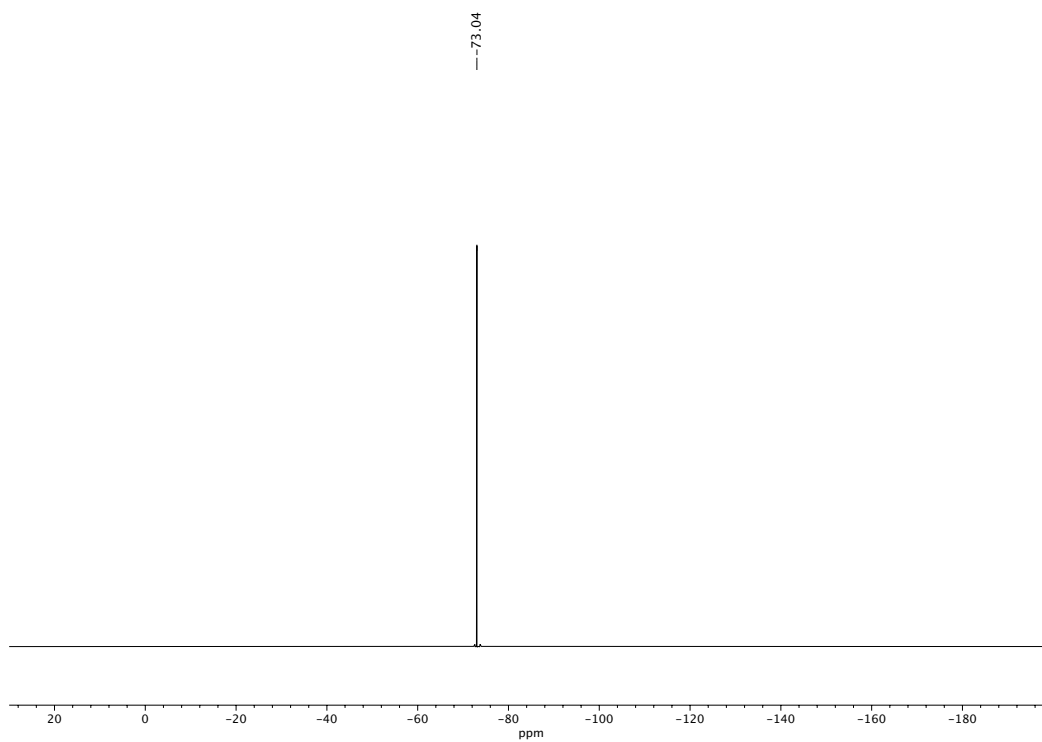

$^{19}\text{F}$  NMR (282 MHz,  $\text{CDCl}_3$ ) of **5c**.

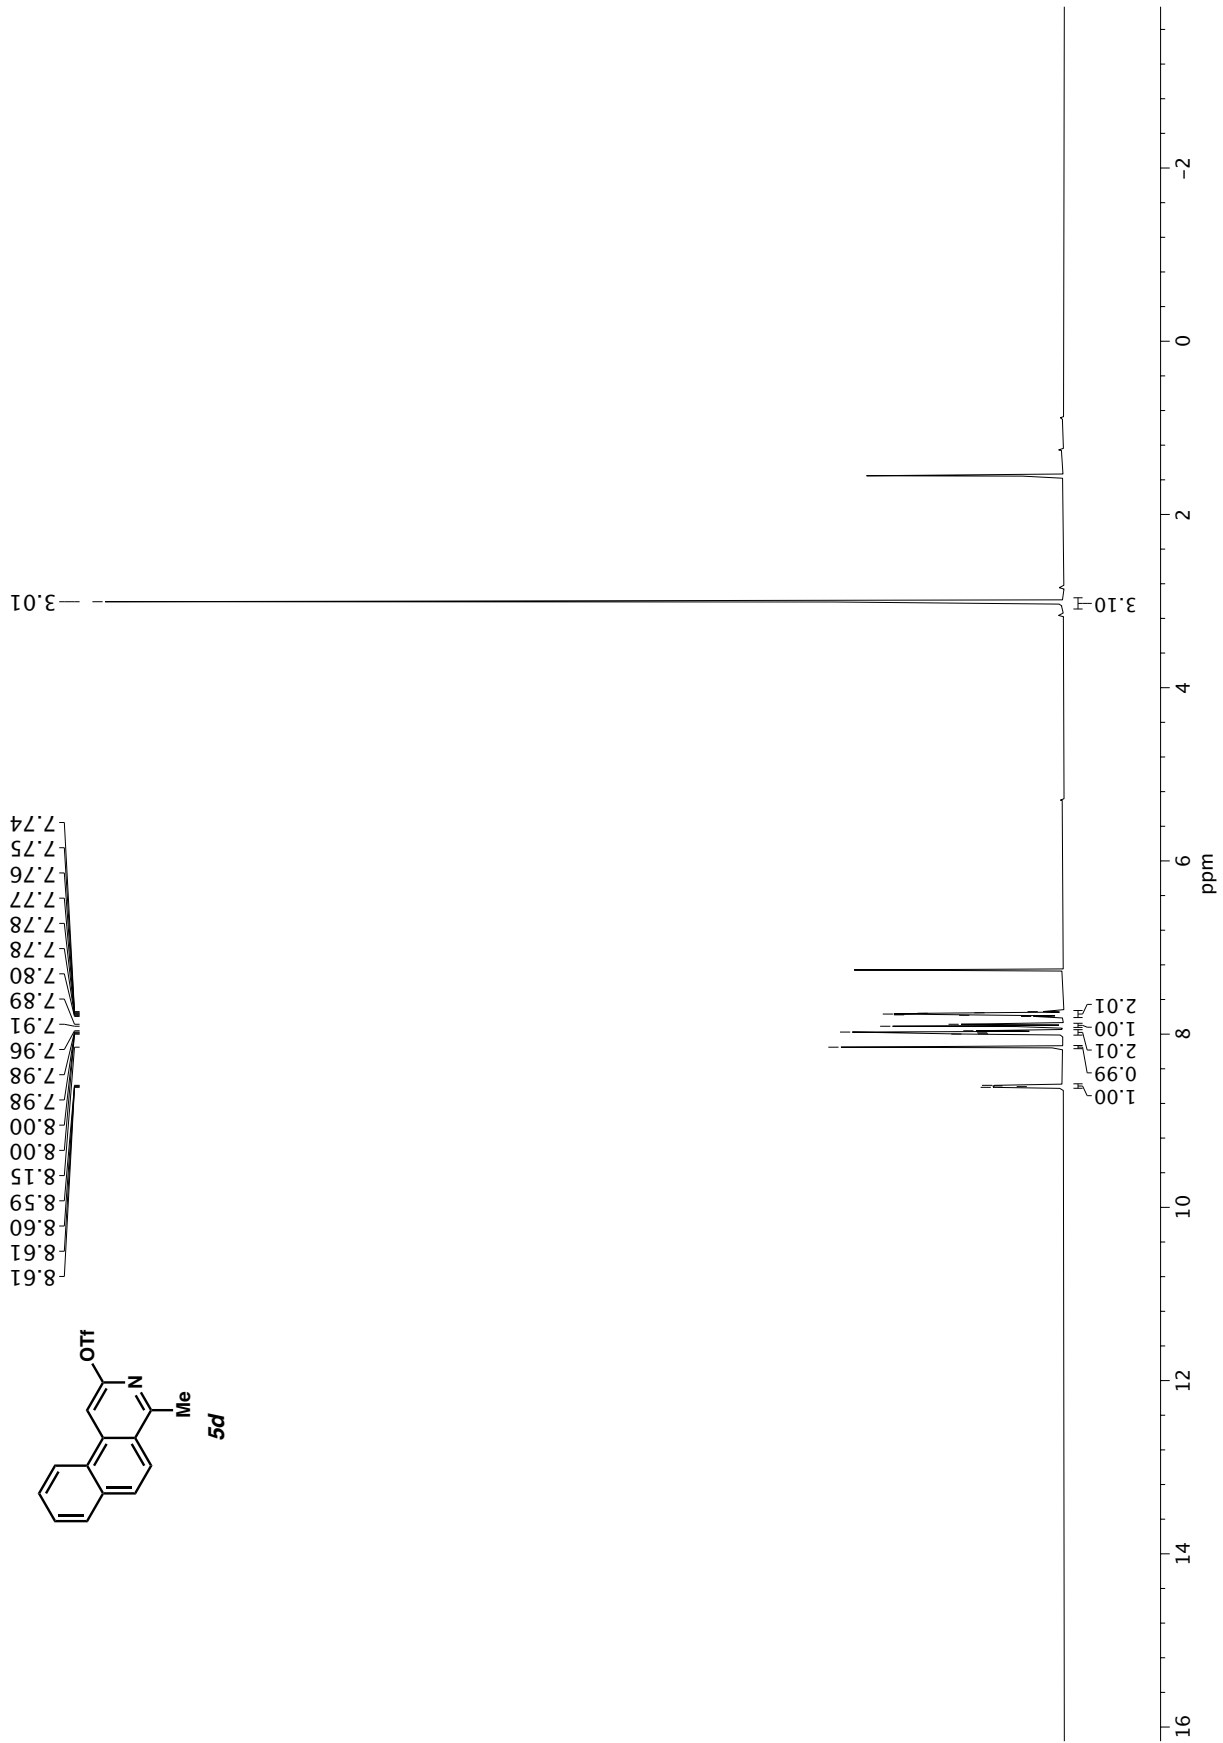



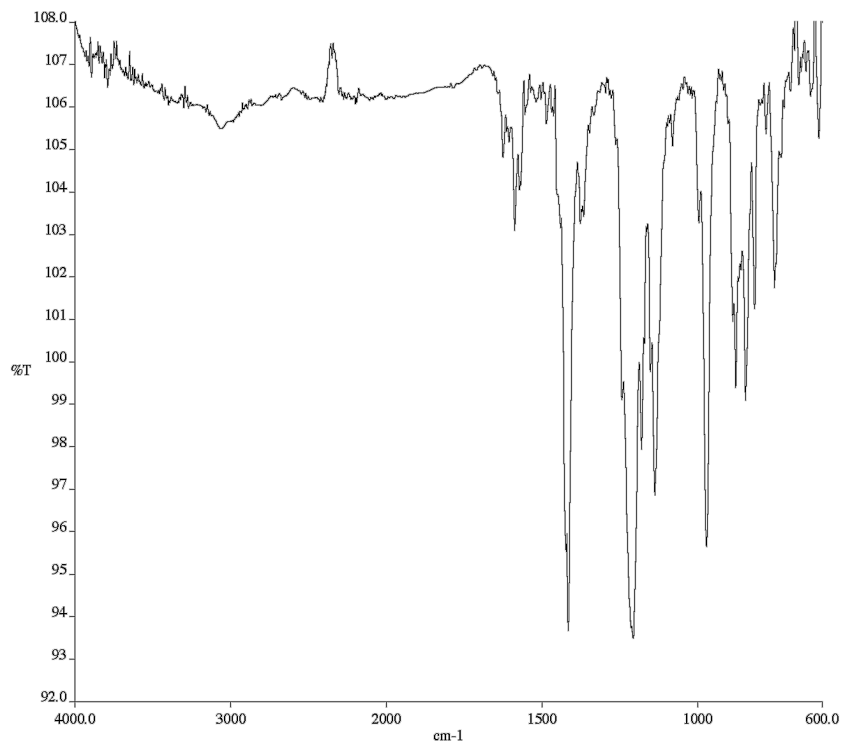

Infrared spectrum (Thin Film, NaCl) of **5d**.

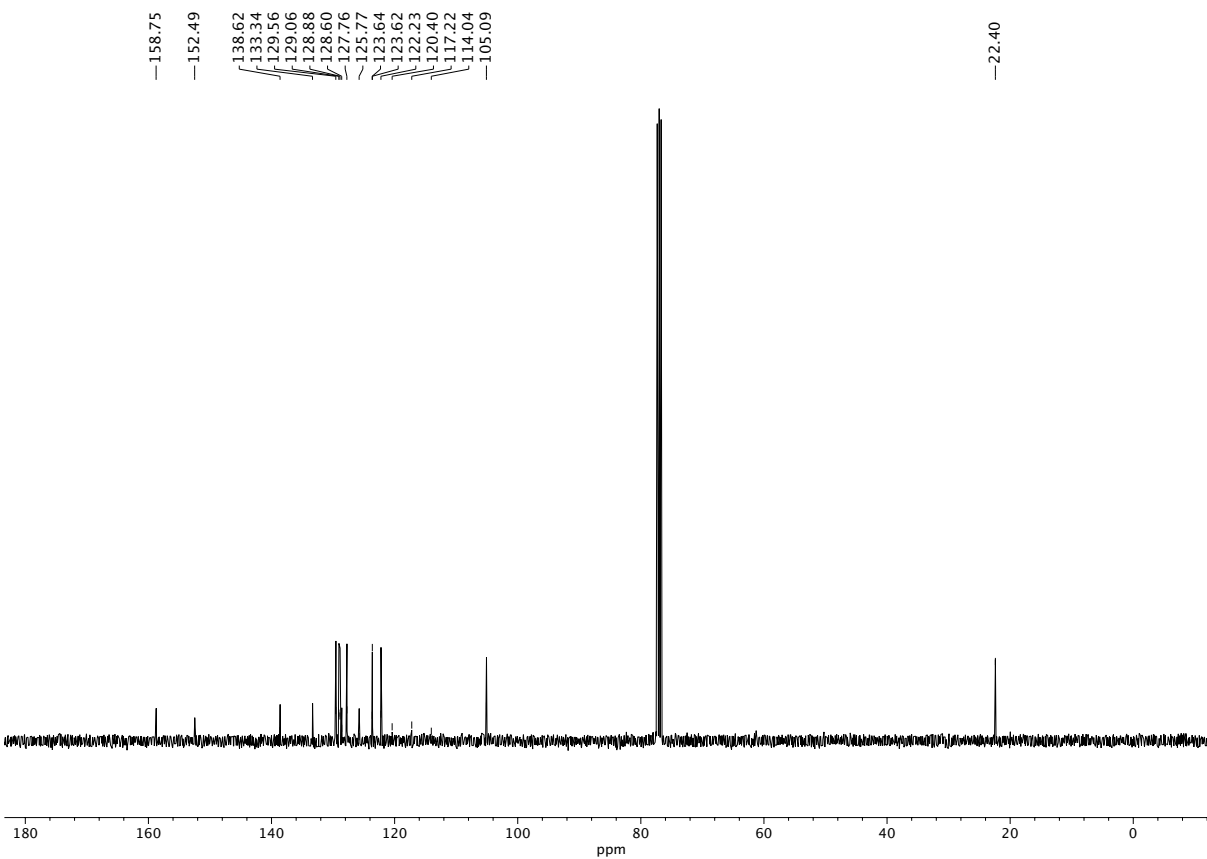

$^{13}\text{C}$  NMR (100 MHz,  $\text{CDCl}_3$ ) of **5d**.

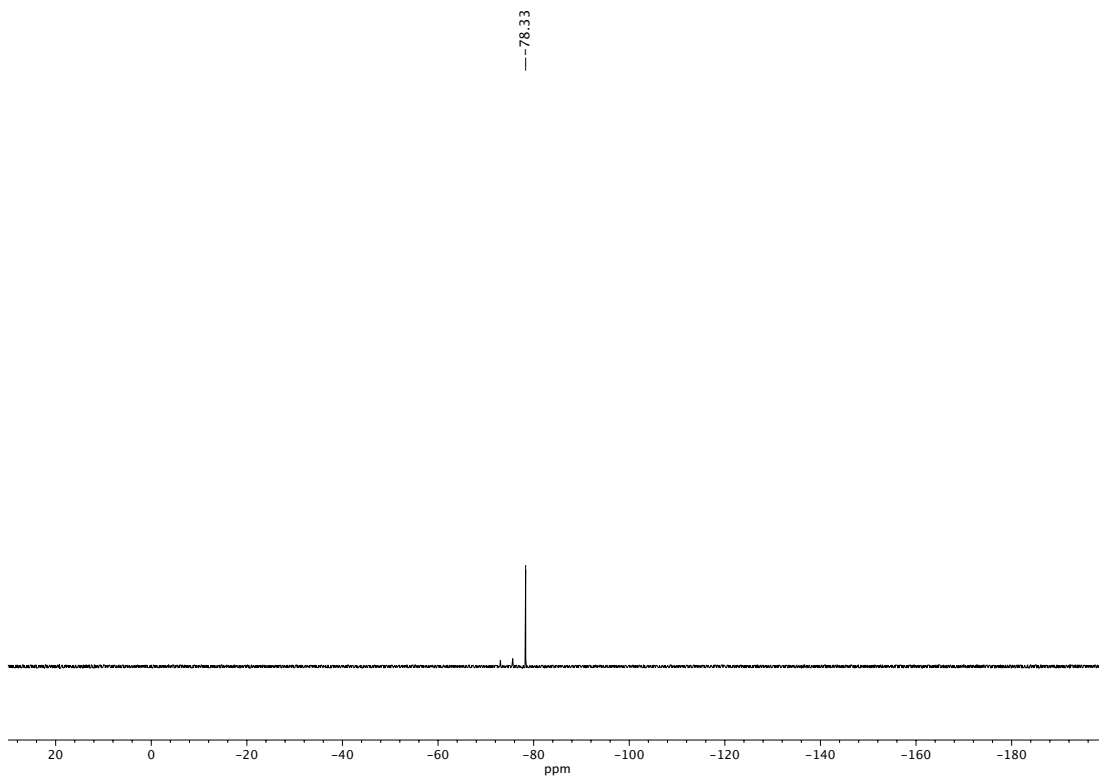

$^{19}\text{F}$  NMR (282 MHz,  $\text{CDCl}_3$ ) of **5d**.



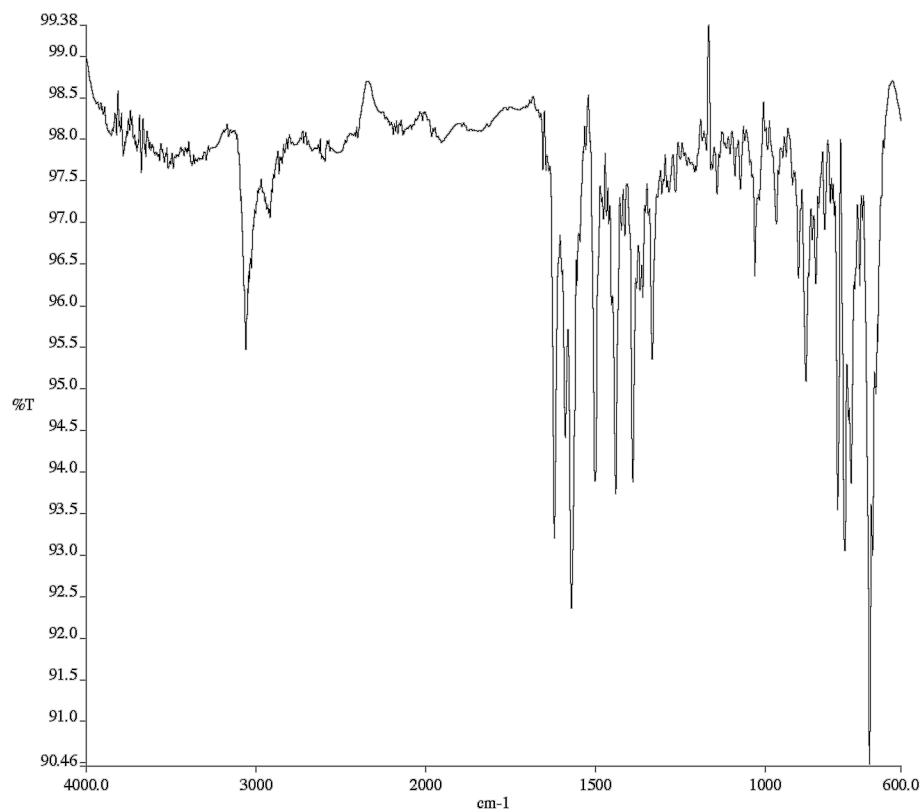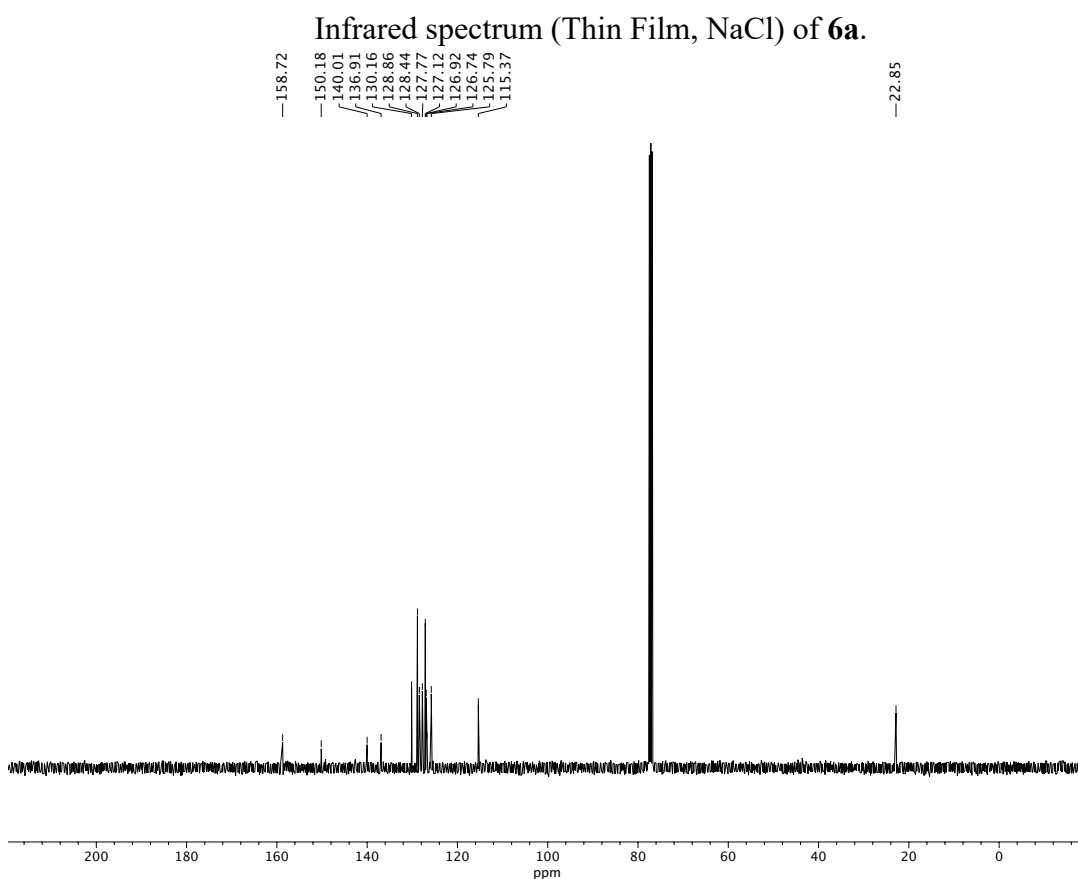

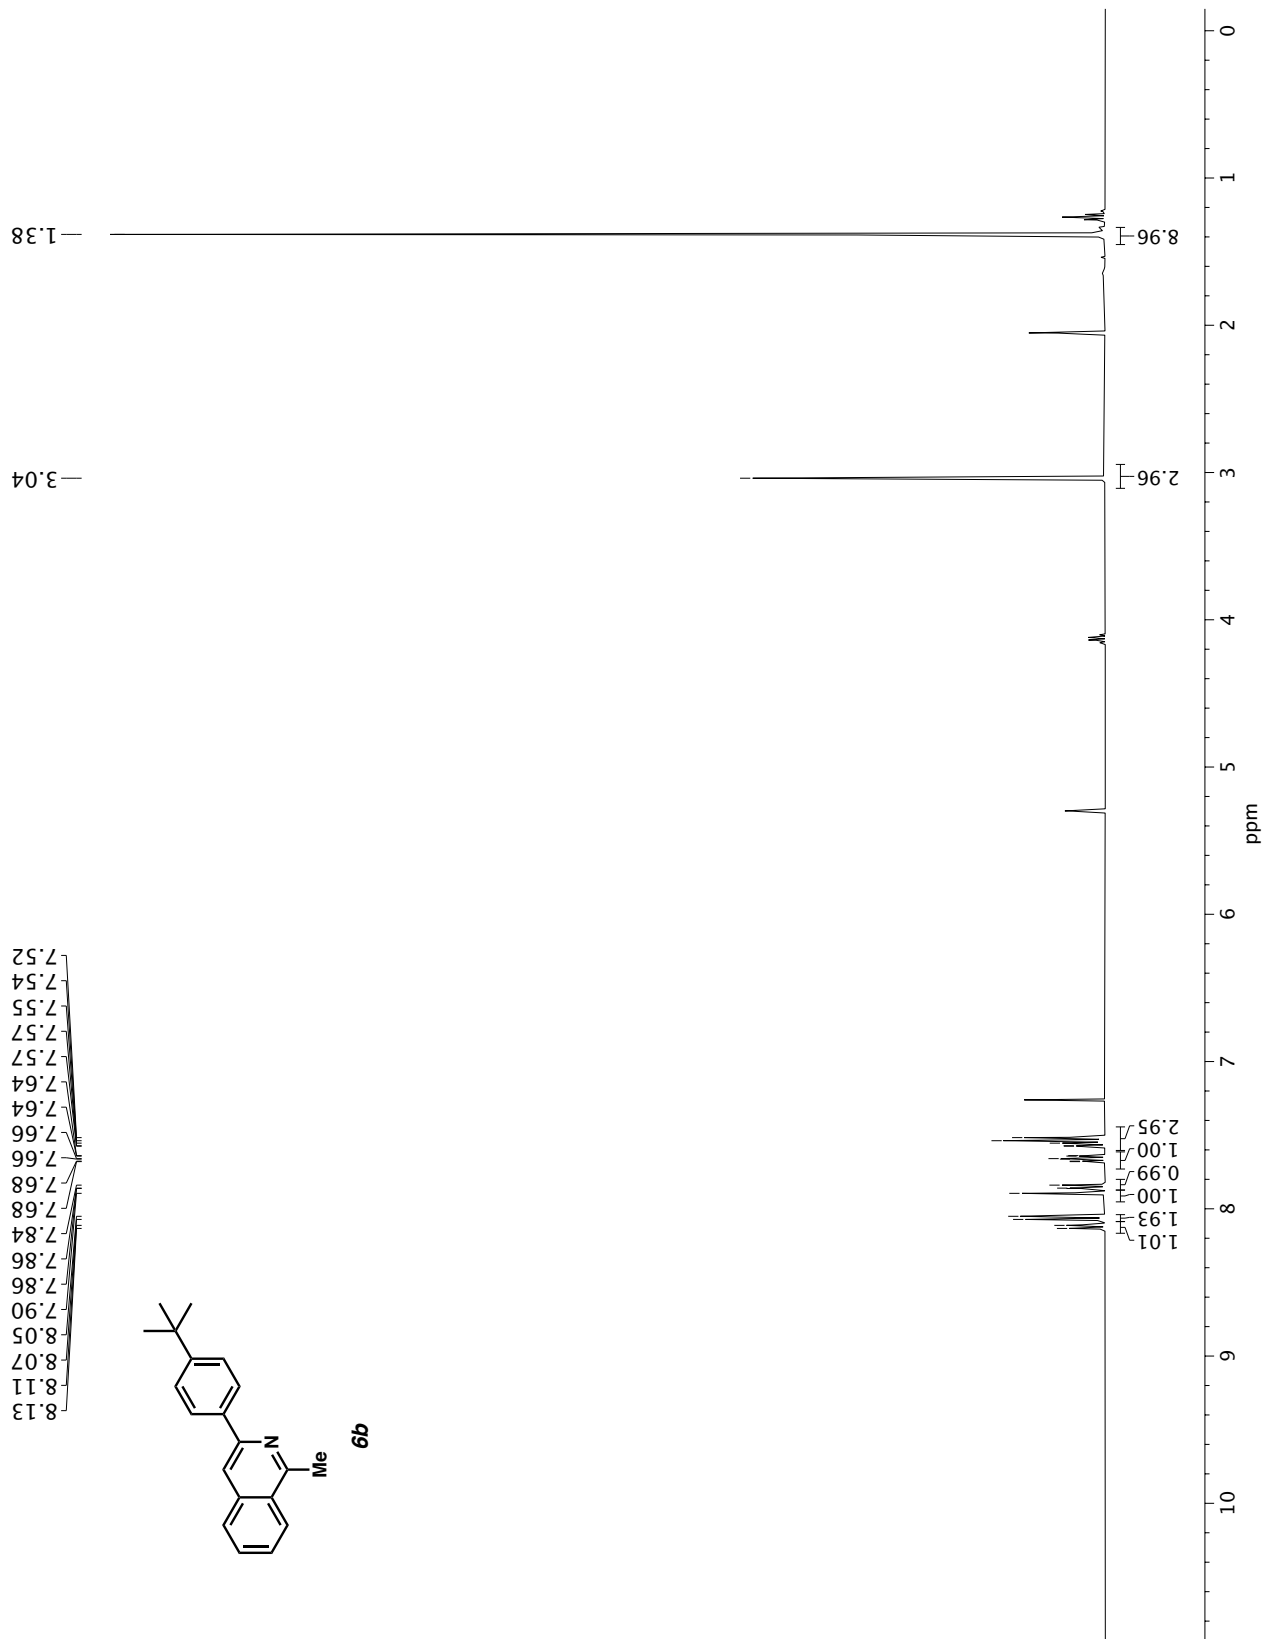

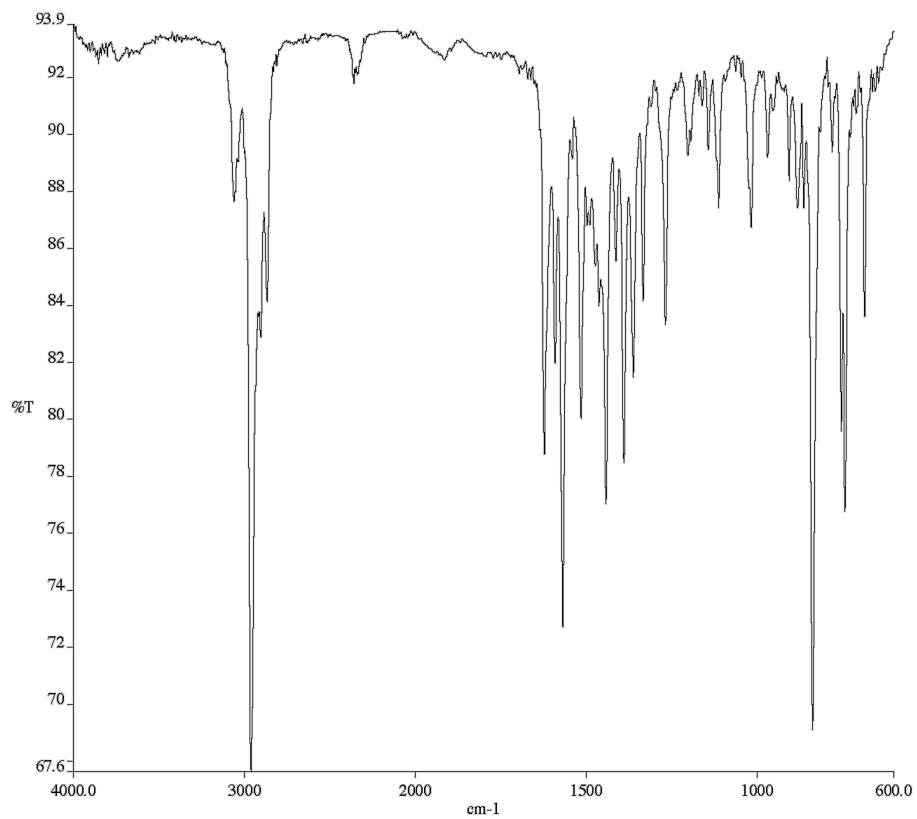

Infrared spectrum (Thin Film, NaCl) of **6b**.

1588.59  
1511.49  
1502.28  
1372.26  
1366.93  
1300.05  
1277.69  
1266.83  
1266.68  
1265.59  
1255.81  
1253.77  
1144.95  
34.78  
31.49  
22.83

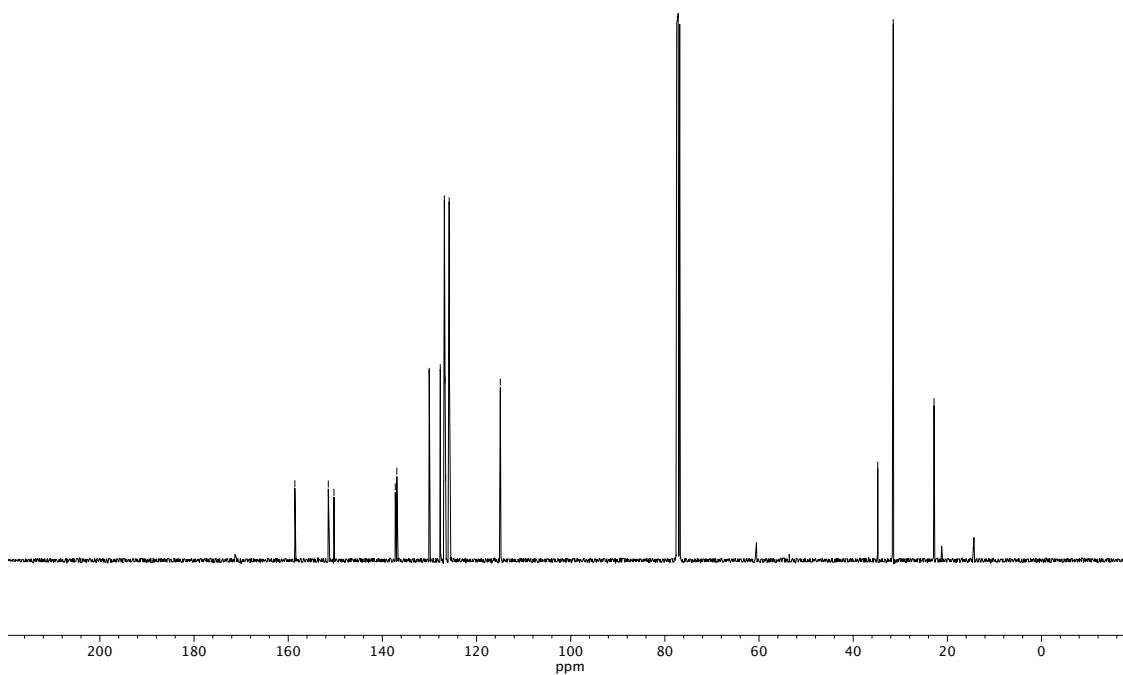

$^{13}\text{C}$  NMR (100 MHz,  $\text{CDCl}_3$ ) of **6b**.

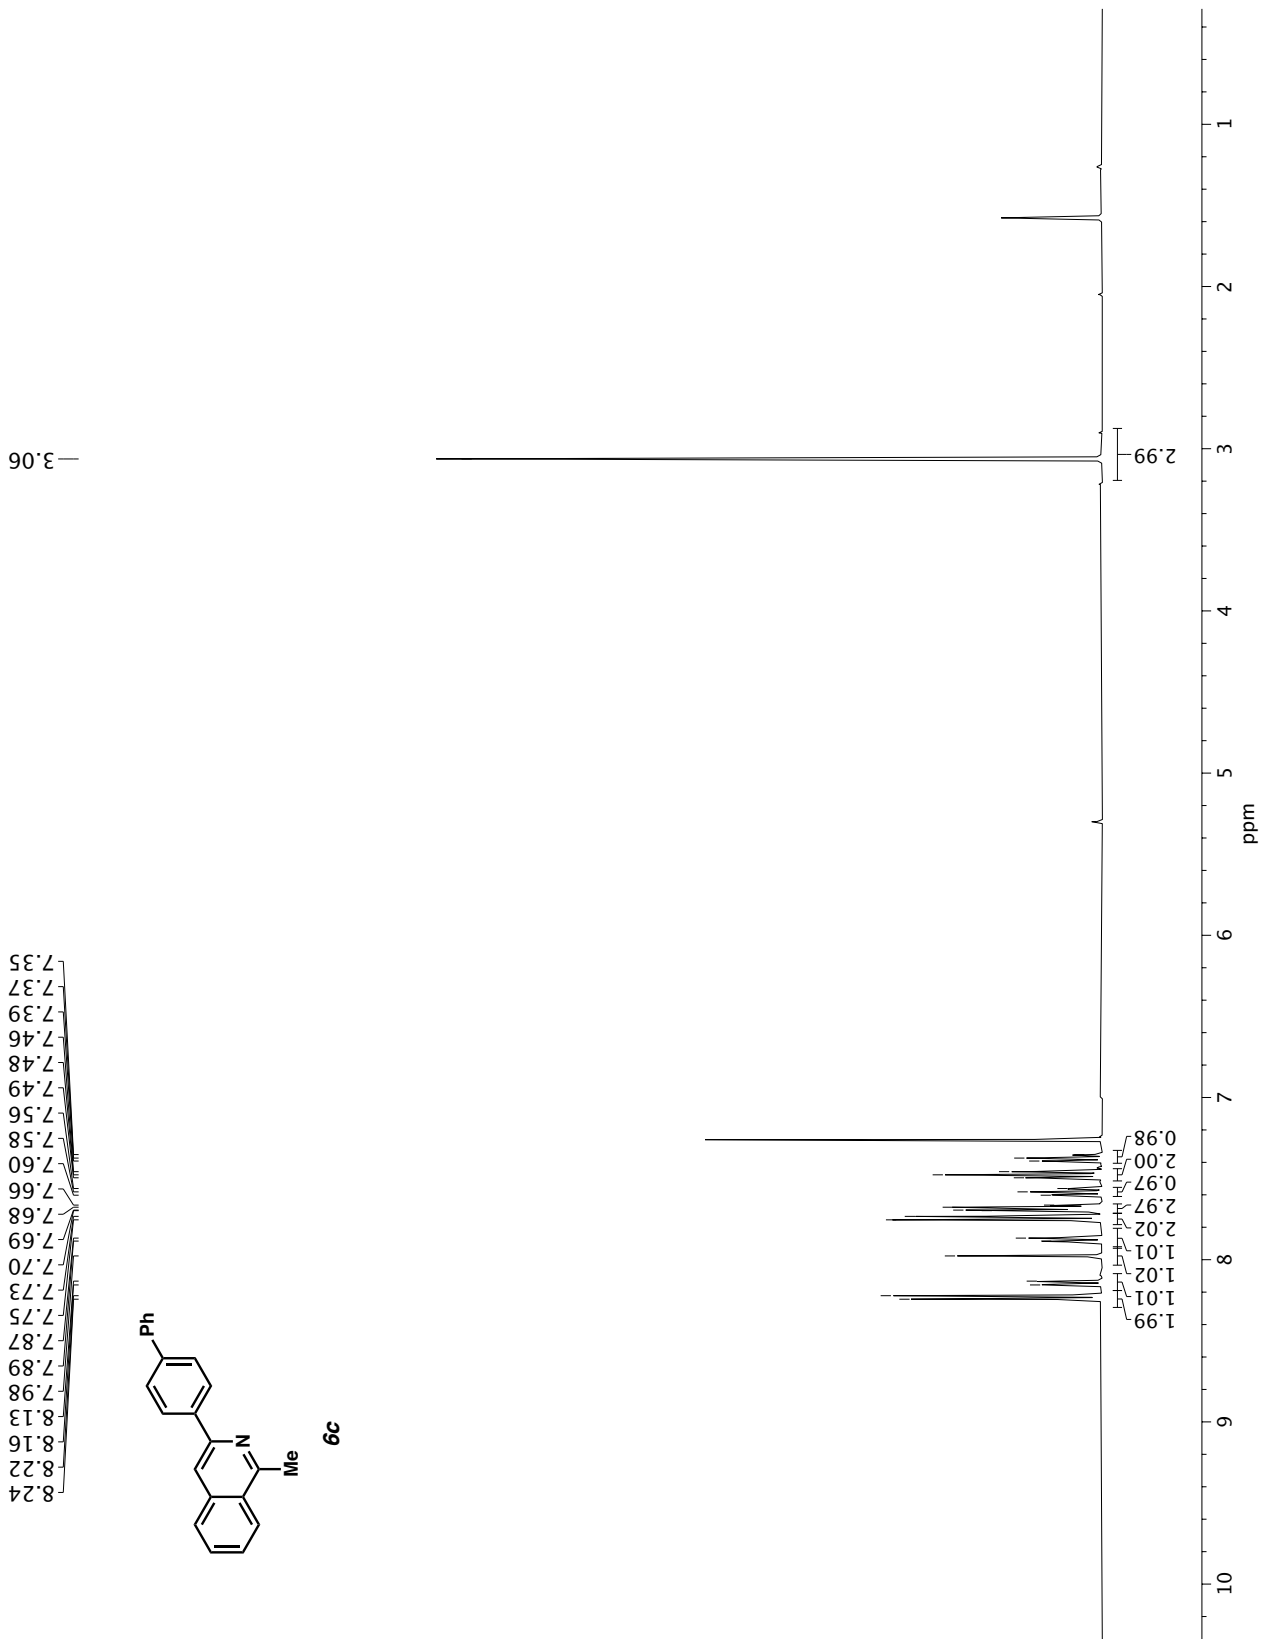

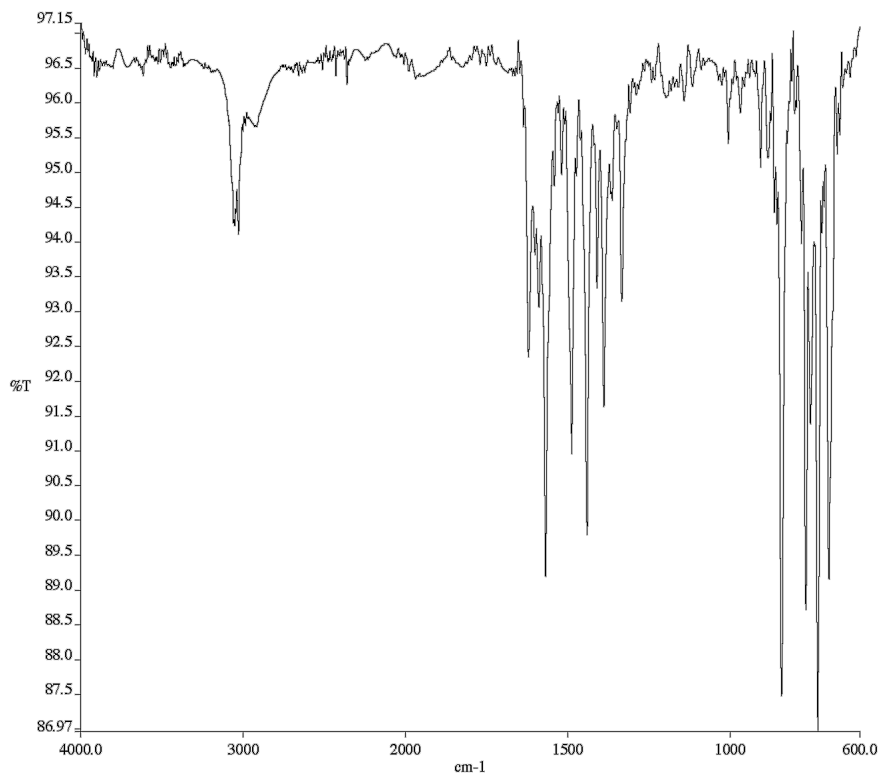

Infrared spectrum (Thin Film, NaCl) of **6c**.

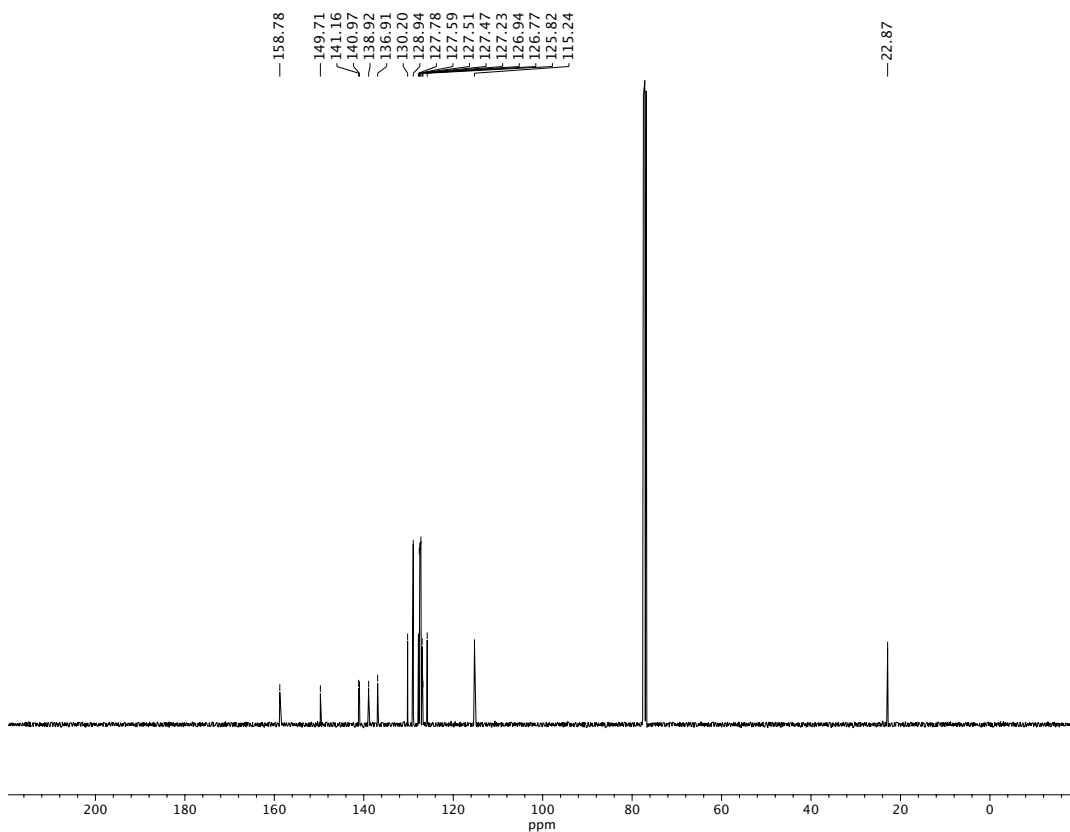

$^{13}\text{C}$  NMR (100 MHz,  $\text{CDCl}_3$ ) of **6c**.



8.12  
8.10  
8.09  
8.09  
7.84  
7.83  
7.81  
7.66  
7.66  
7.64  
7.62  
7.55  
7.54  
7.53  
7.52  
7.51  
7.51  
7.05  
7.03  
7.02

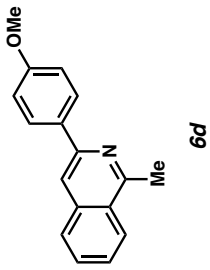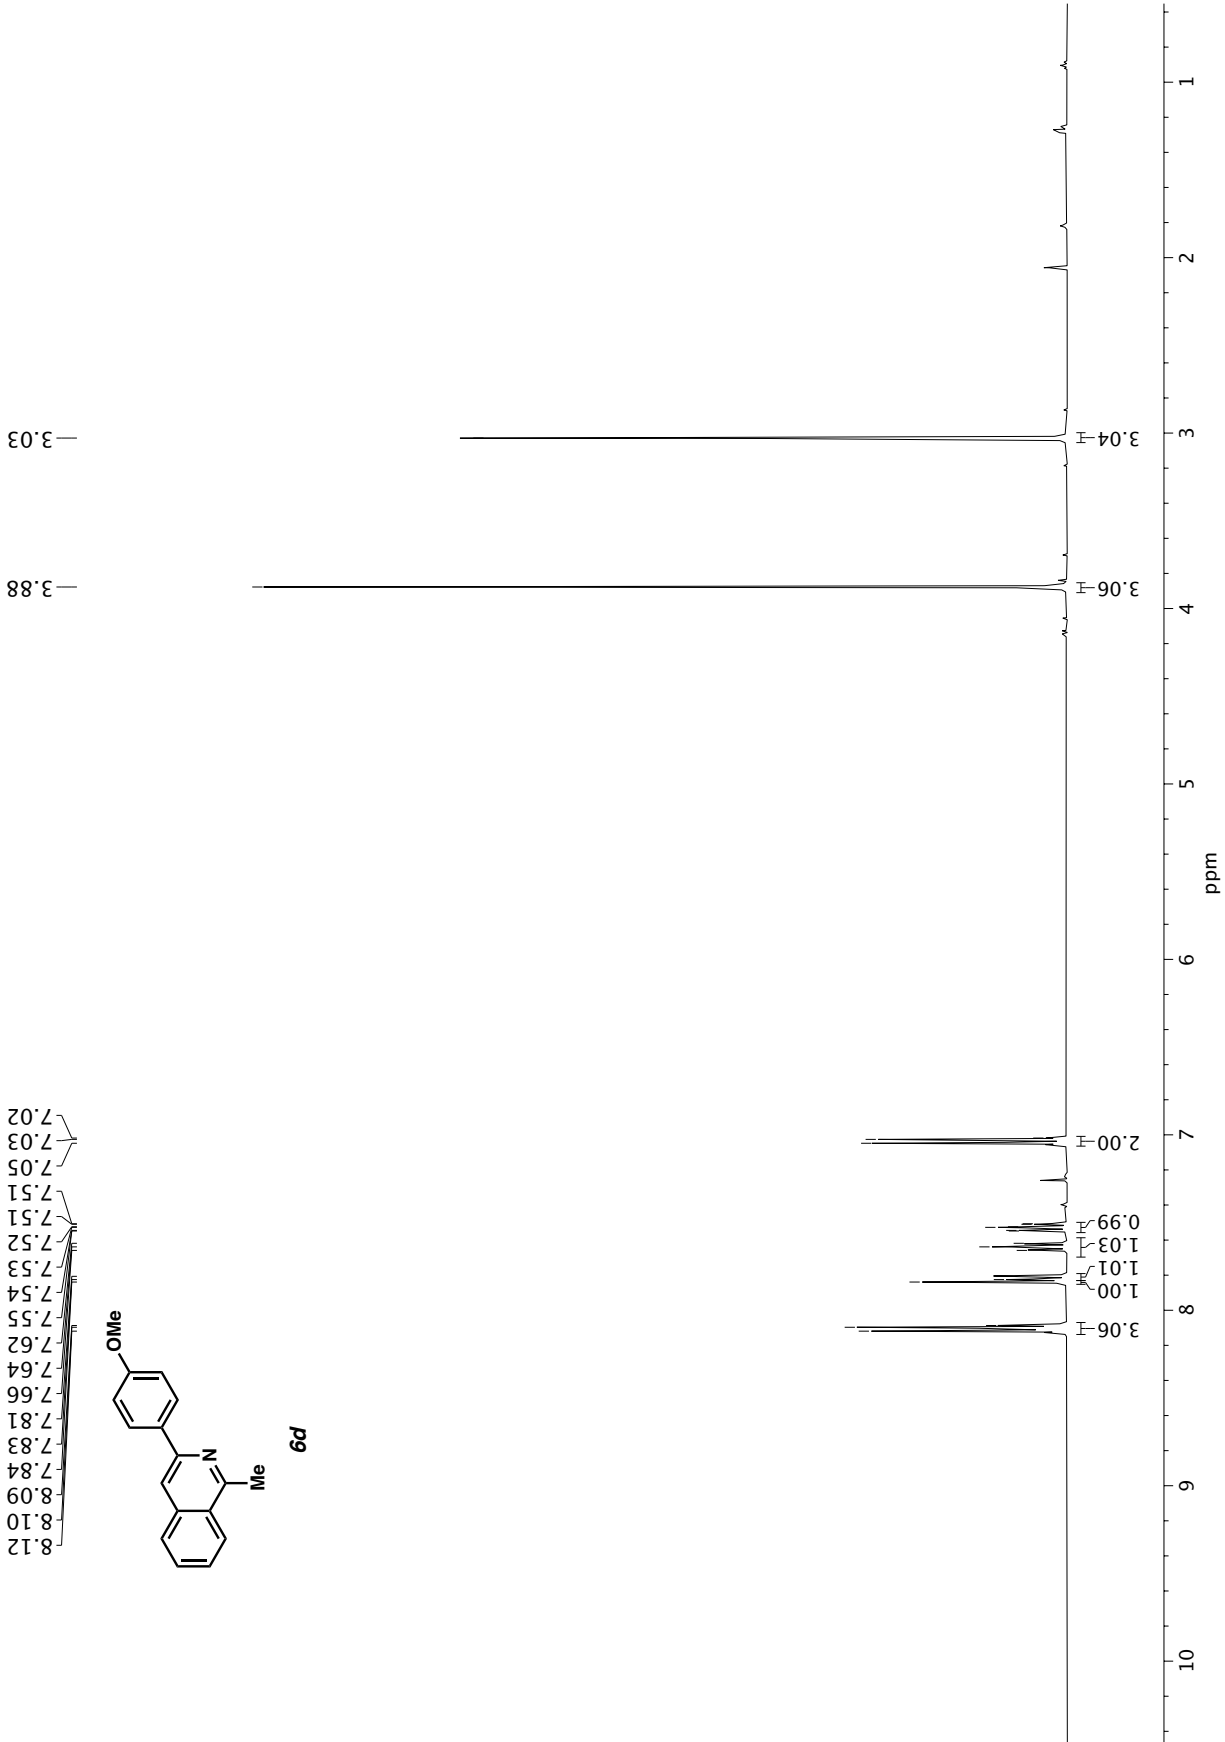

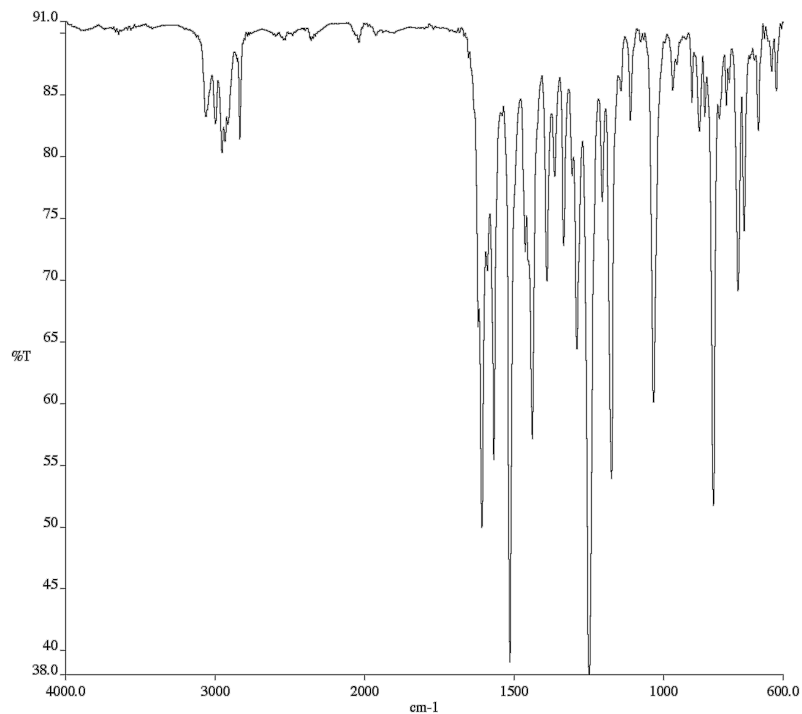

Infrared spectrum (Thin Film, NaCl) of **6d**.

~160.02  
 ~158.43  
 — 149.76  
 /136.90  
 /132.55  
 /129.96  
 /128.20  
 /127.49  
 /126.41  
 /126.27  
 /123.65  
 <114.14  
 <114.11  
 —55.39  
 —22.72

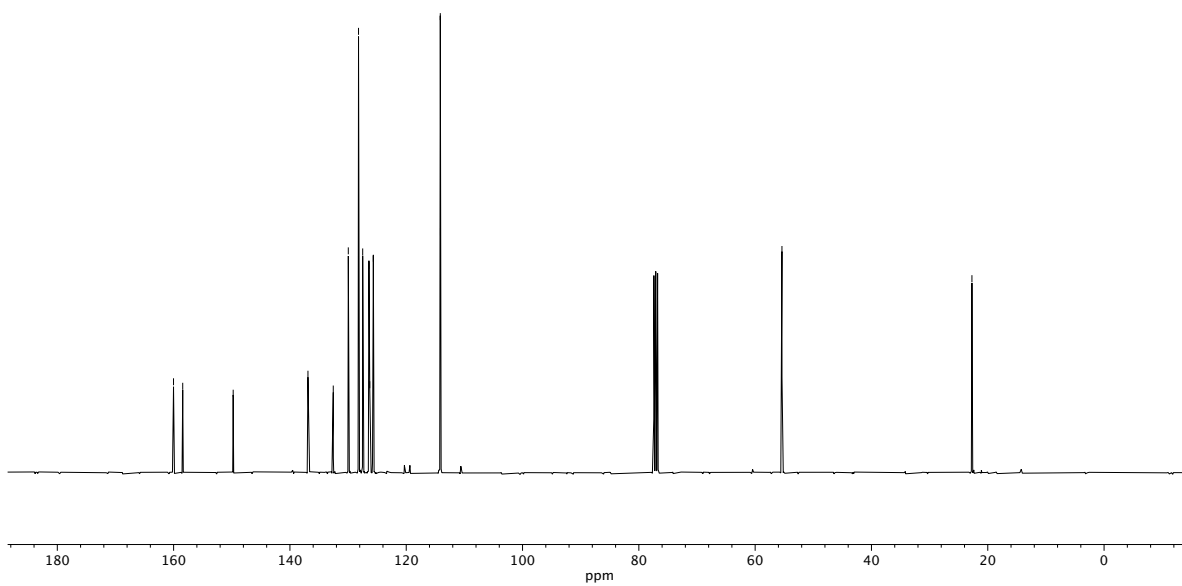

$^{13}\text{C}$  NMR (100 MHz,  $\text{CDCl}_3$ ) of **6d**.

<sup>1</sup>H NMR (400 MHz, CDCl<sub>3</sub>) of **6e**.

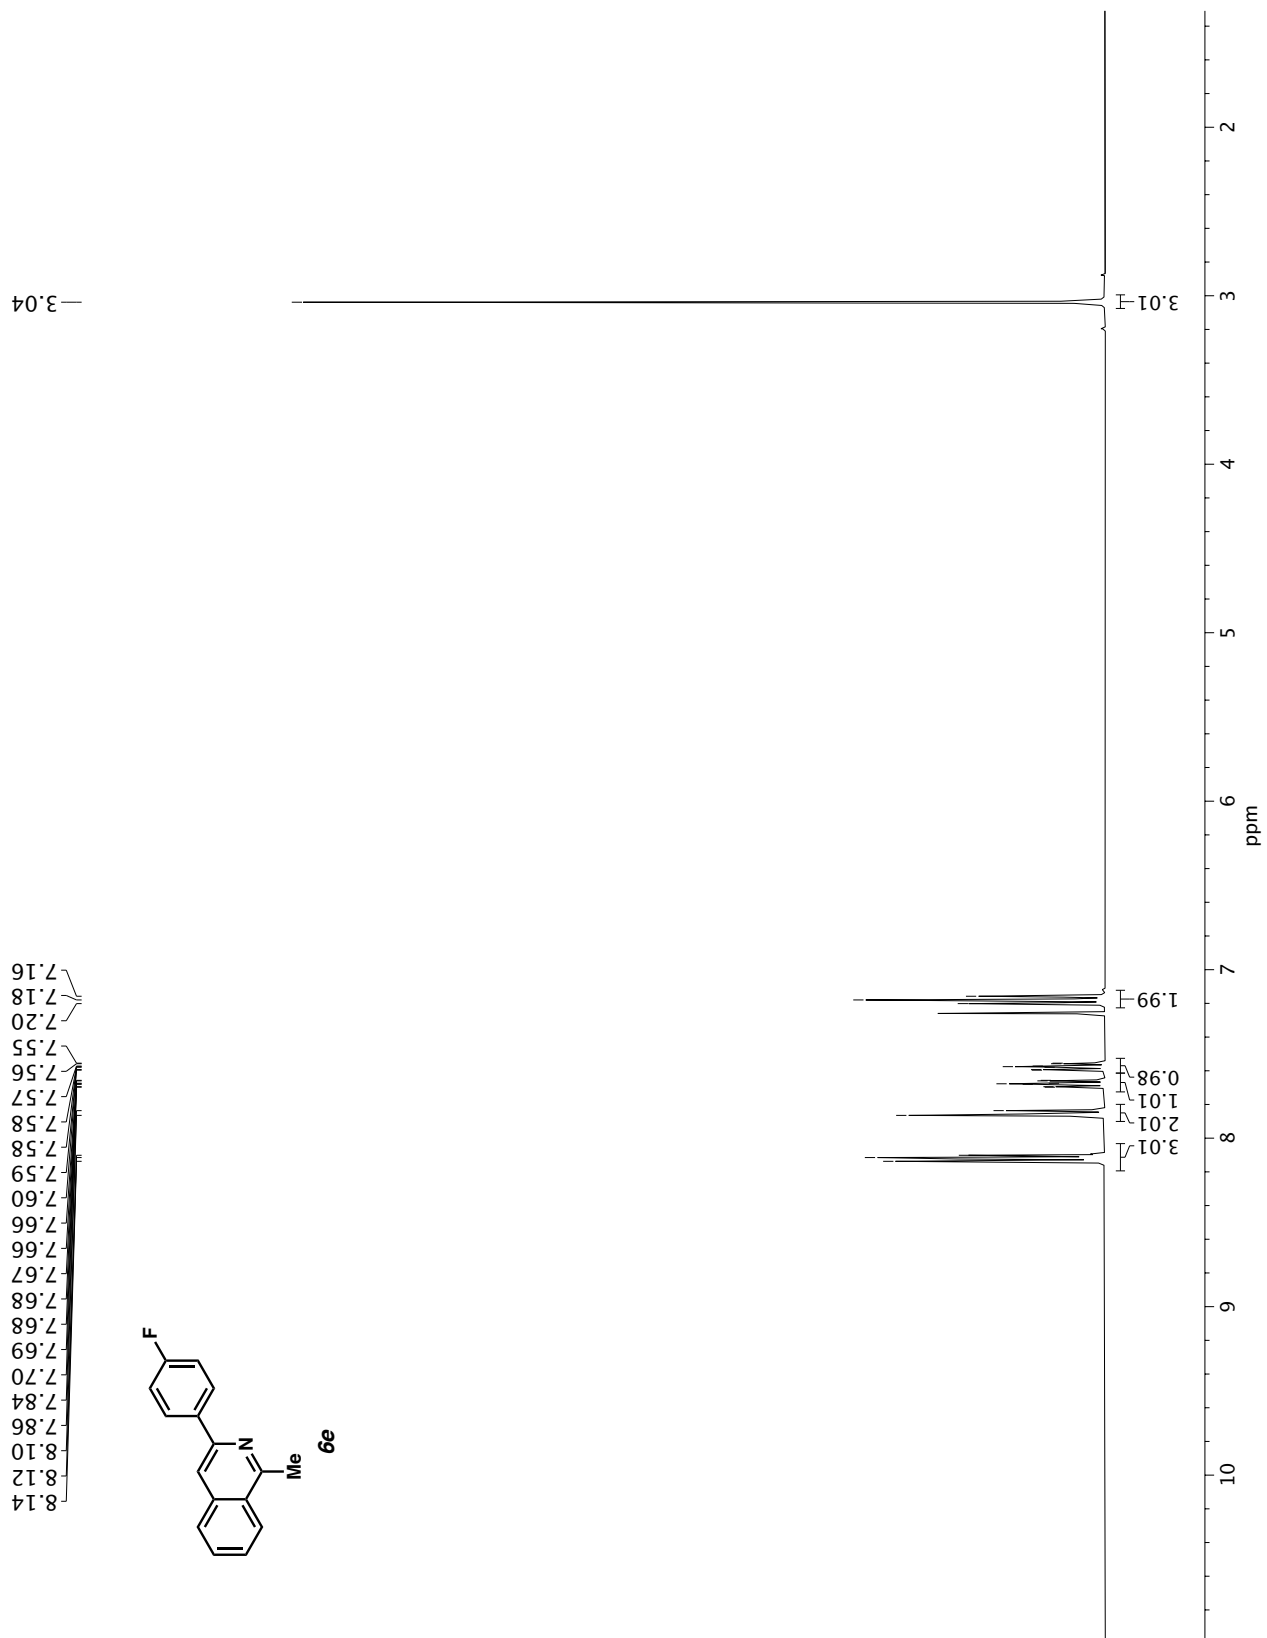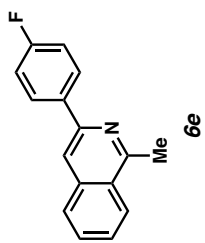

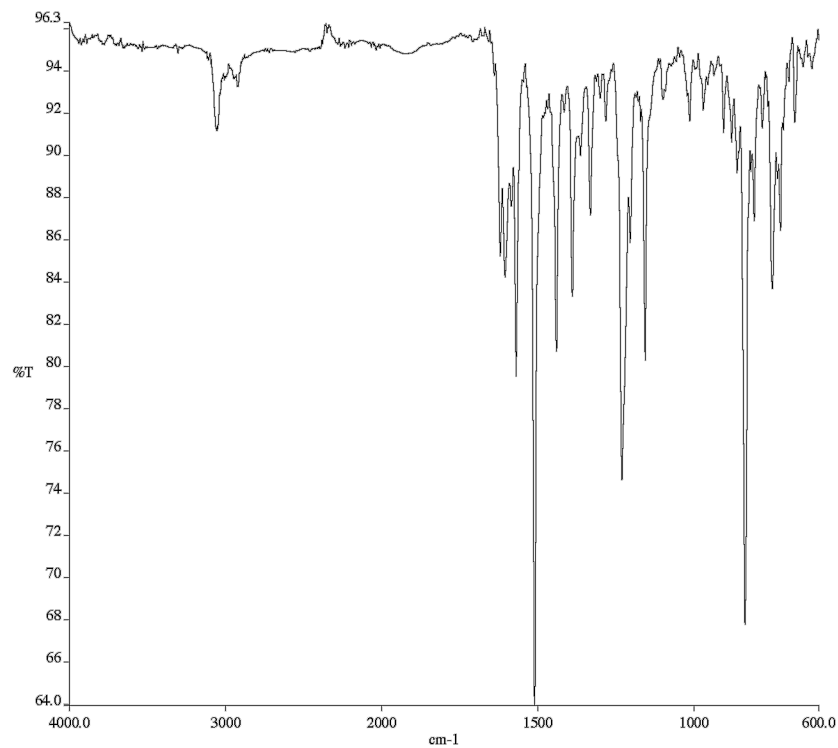

Infrared spectrum (Thin Film, NaCl) of **6e**.

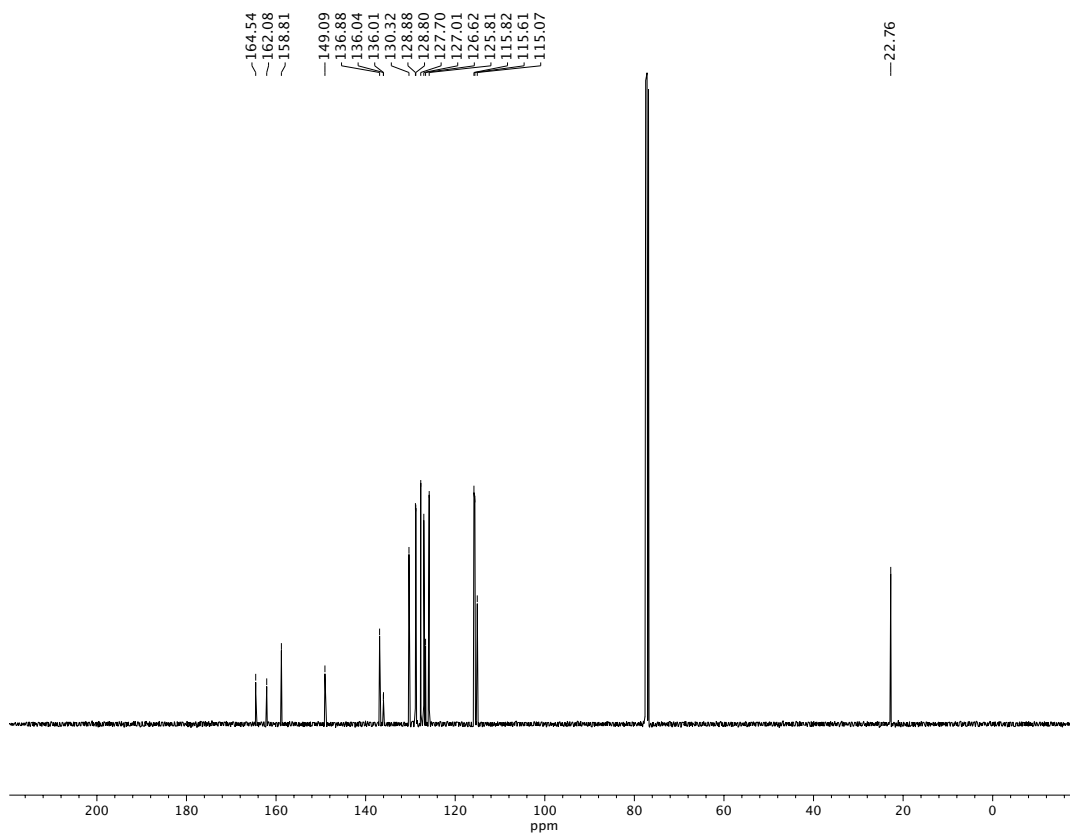

$^{13}\text{C}$  NMR (100 MHz,  $\text{CDCl}_3$ ) of **6e**.

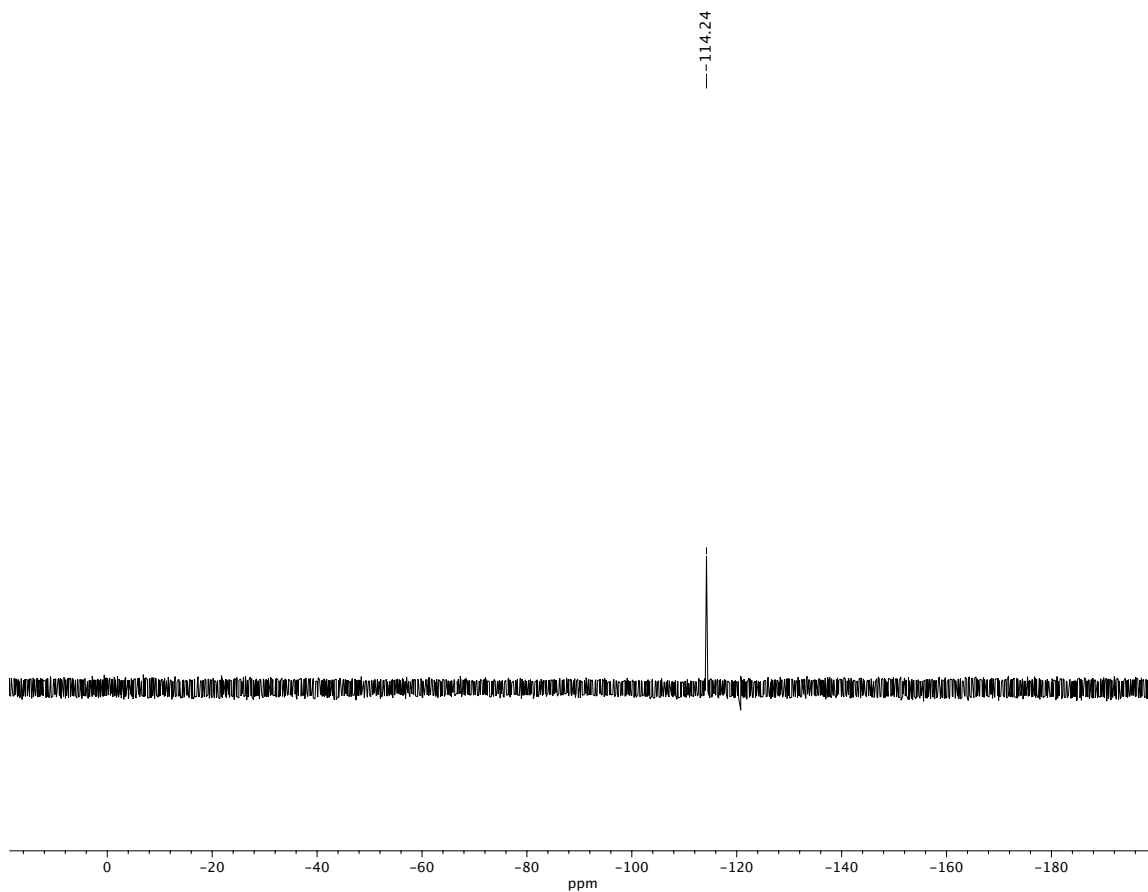

$^{19}\text{F}$  NMR (282 MHz,  $\text{CDCl}_3$ ) of **6e**.

8.27  
8.25  
8.16  
8.15  
8.14  
8.13  
7.96  
7.89  
7.87  
7.75  
7.73  
7.72  
7.70  
7.69  
7.63  
7.62  
7.59

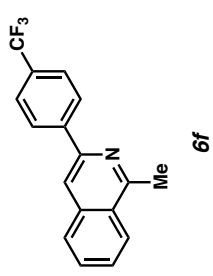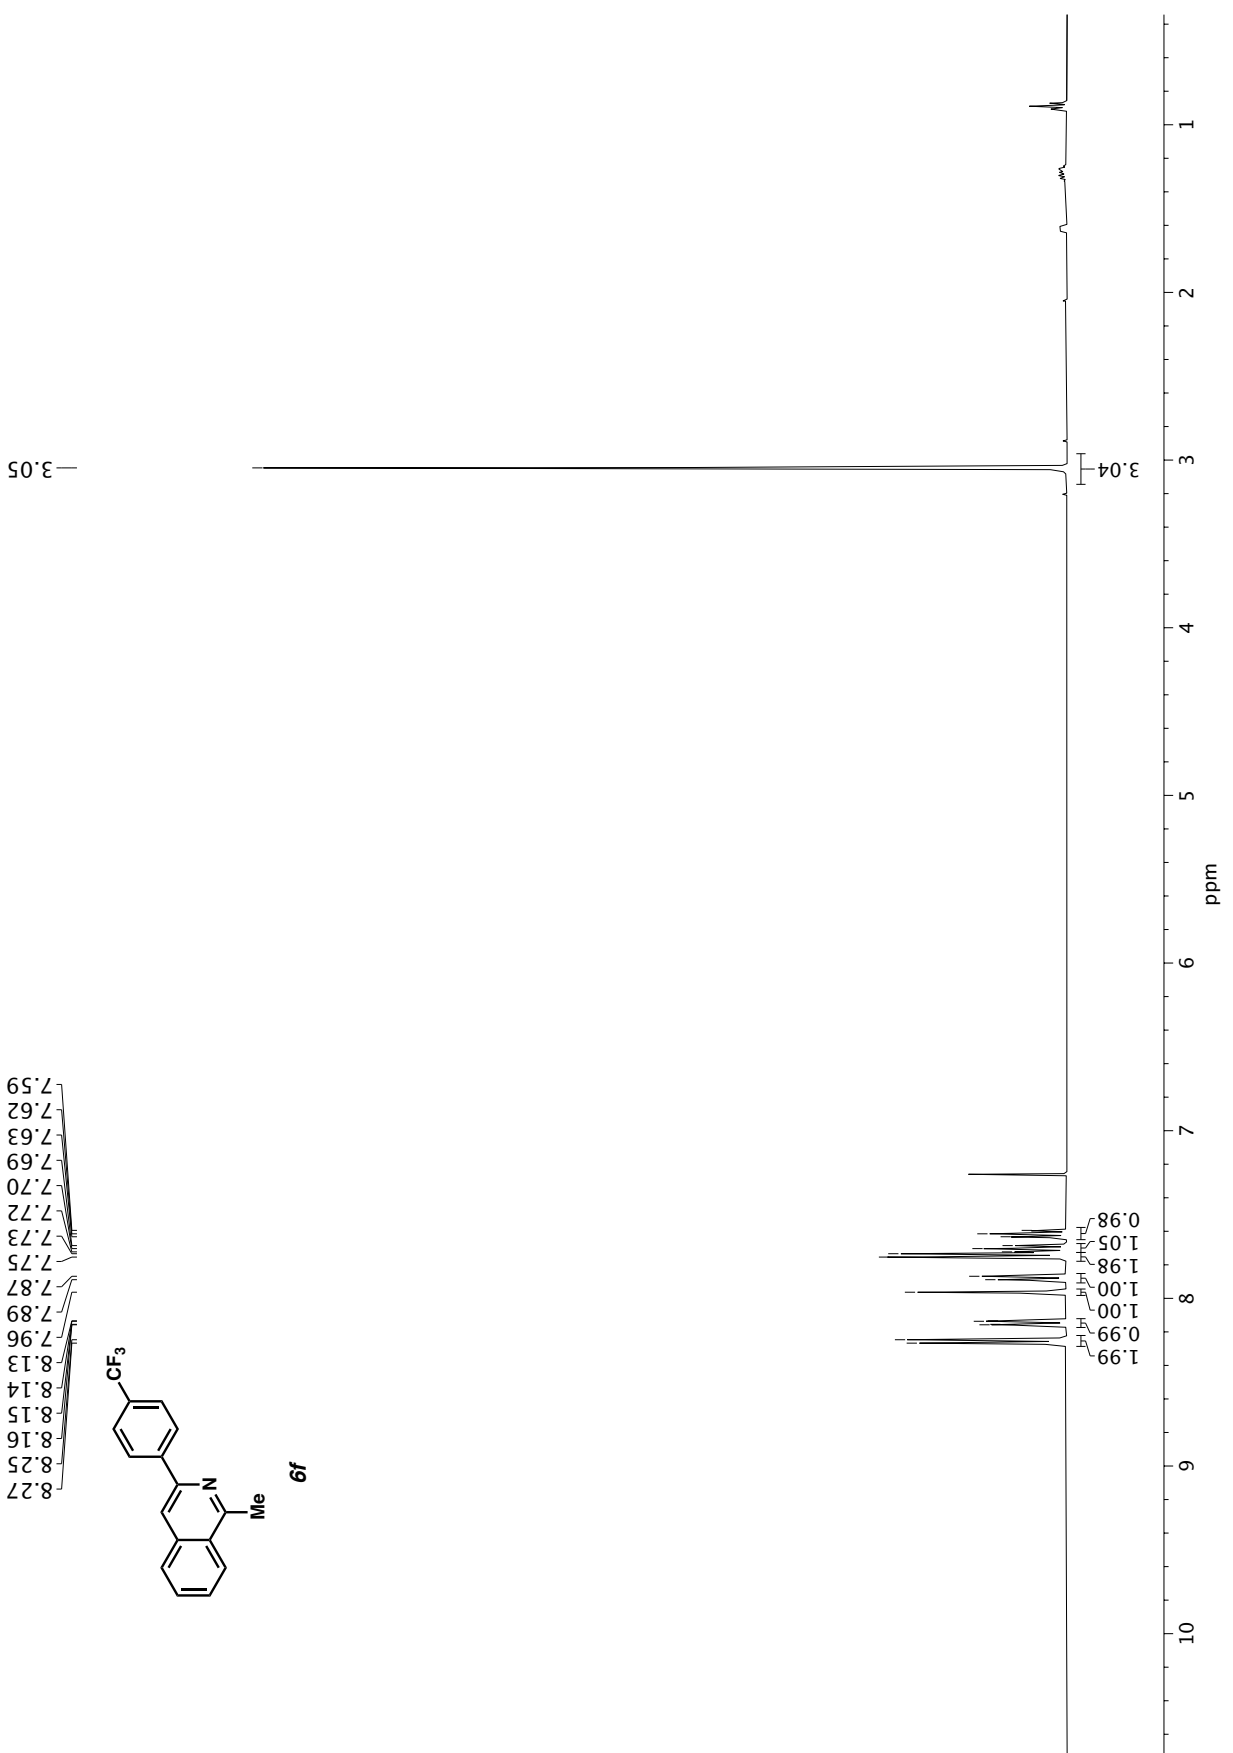

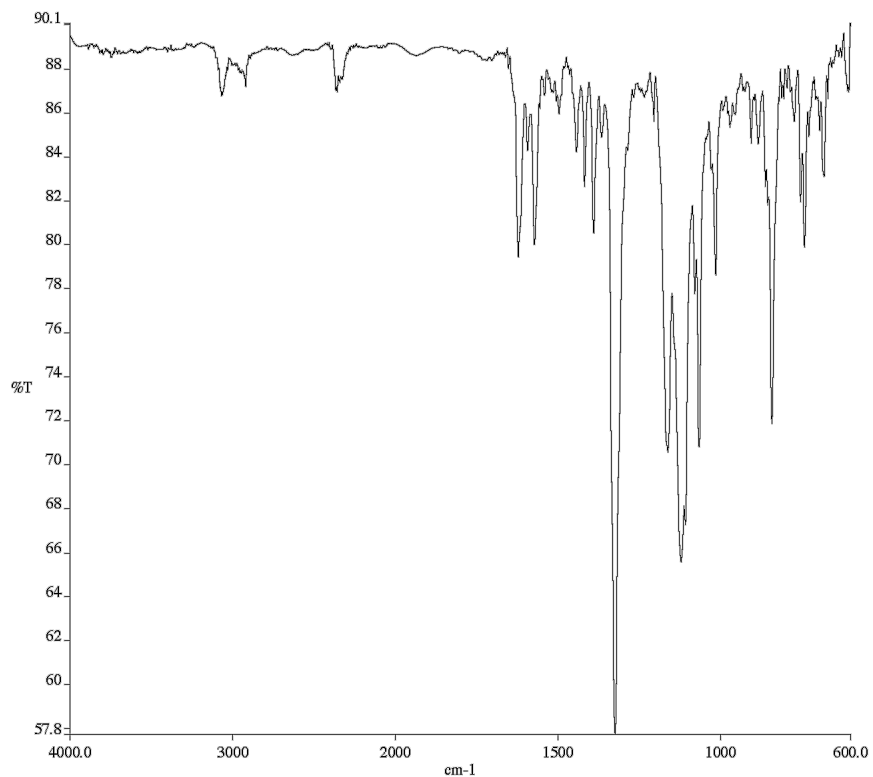

Infrared spectrum (Thin Film, NaCl) of **6f**.

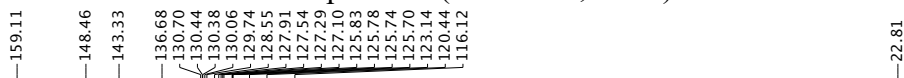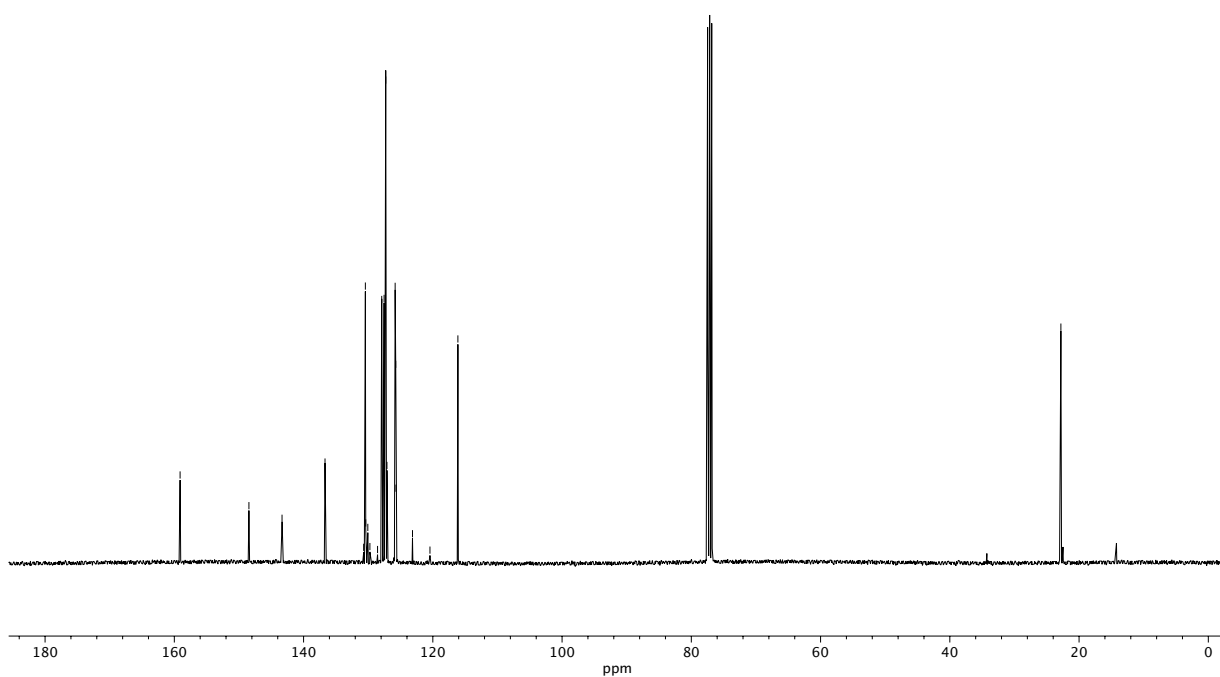

$^{13}\text{C}$  NMR (100 MHz,  $\text{CDCl}_3$ ) of **6f**.

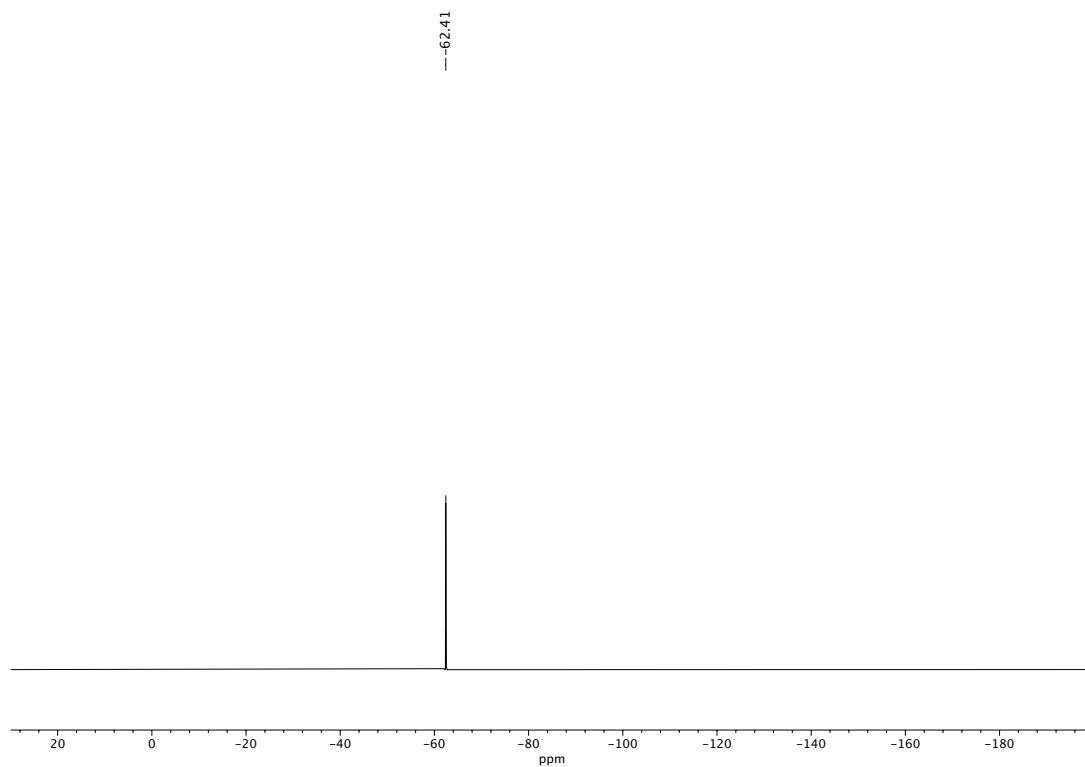

$^{19}\text{F}$  NMR (282 MHz,  $\text{CDCl}_3$ ) of **6f**.



<sup>1</sup>H NMR (400 MHz, CDCl<sub>3</sub>) of **6g**.

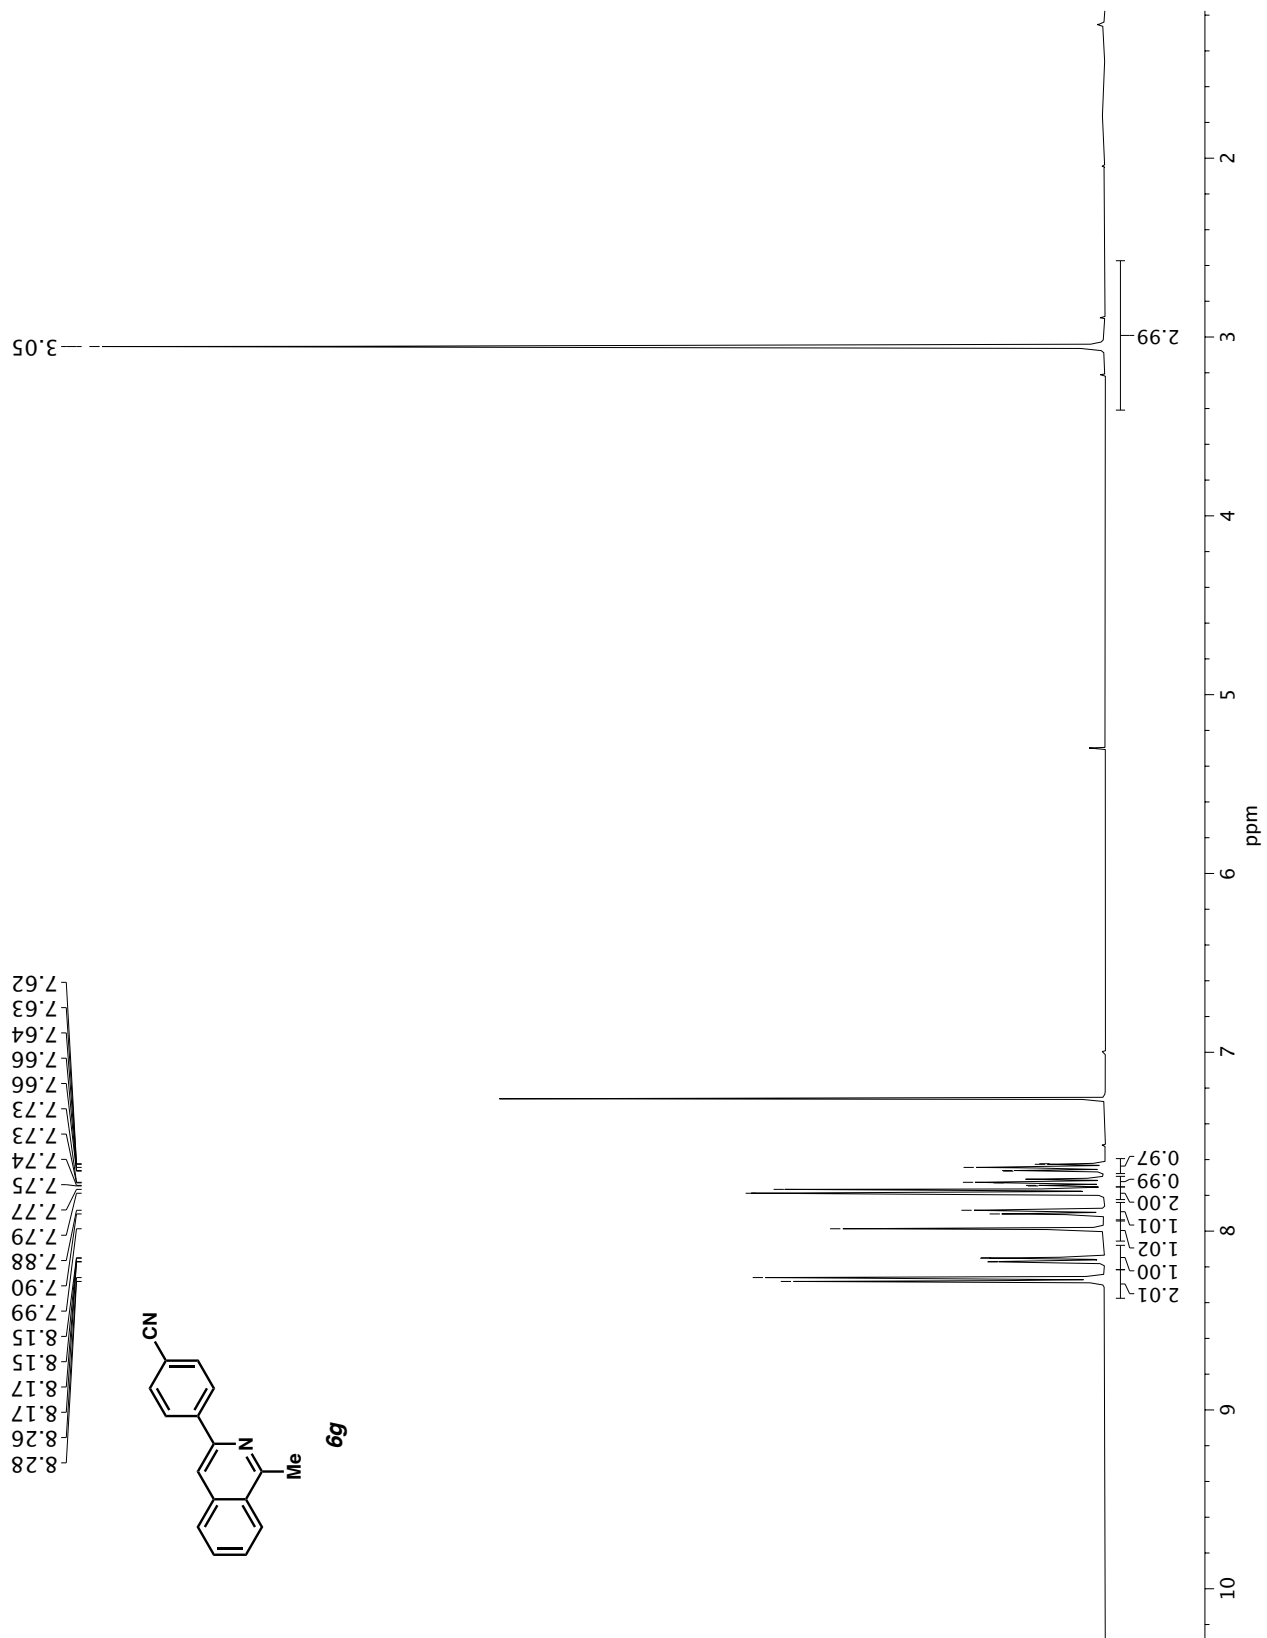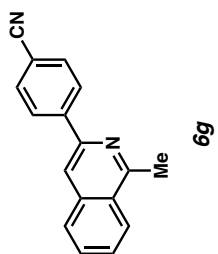

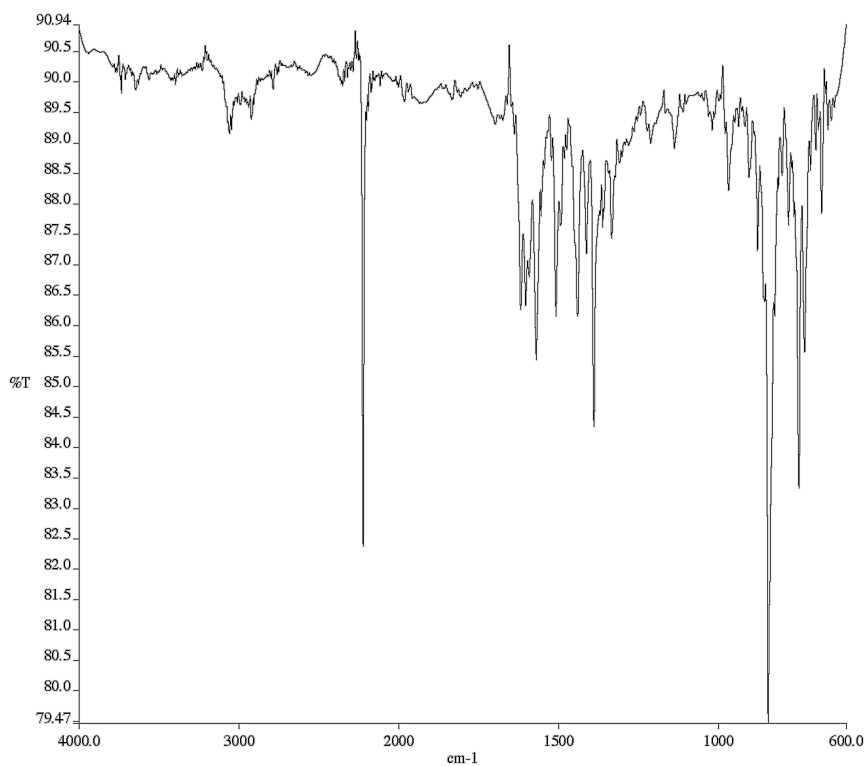

Infrared spectrum (Thin Film, NaCl) of **6g**.

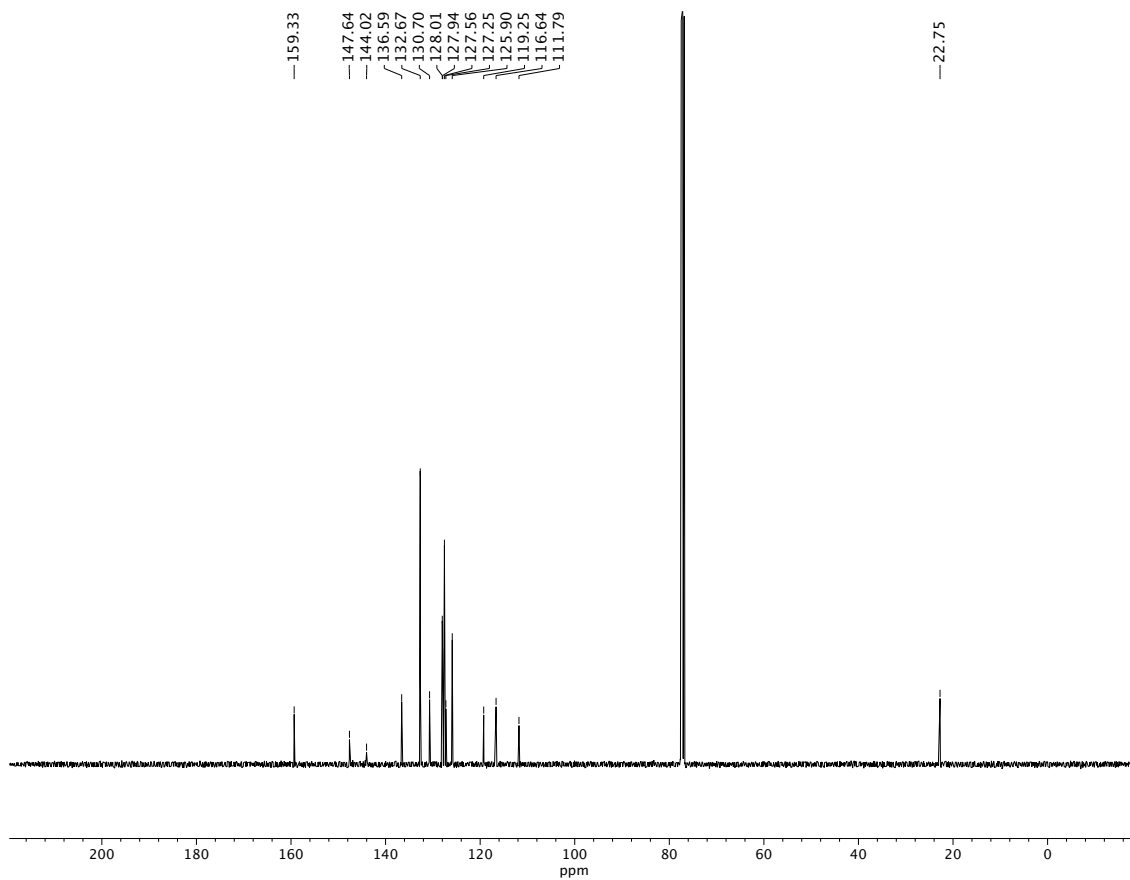

<sup>13</sup>C NMR (100 MHz, CDCl<sub>3</sub>) of **6g**.

<sup>1</sup>H NMR (400 MHz, CDCl<sub>3</sub>) of compound **6h**.

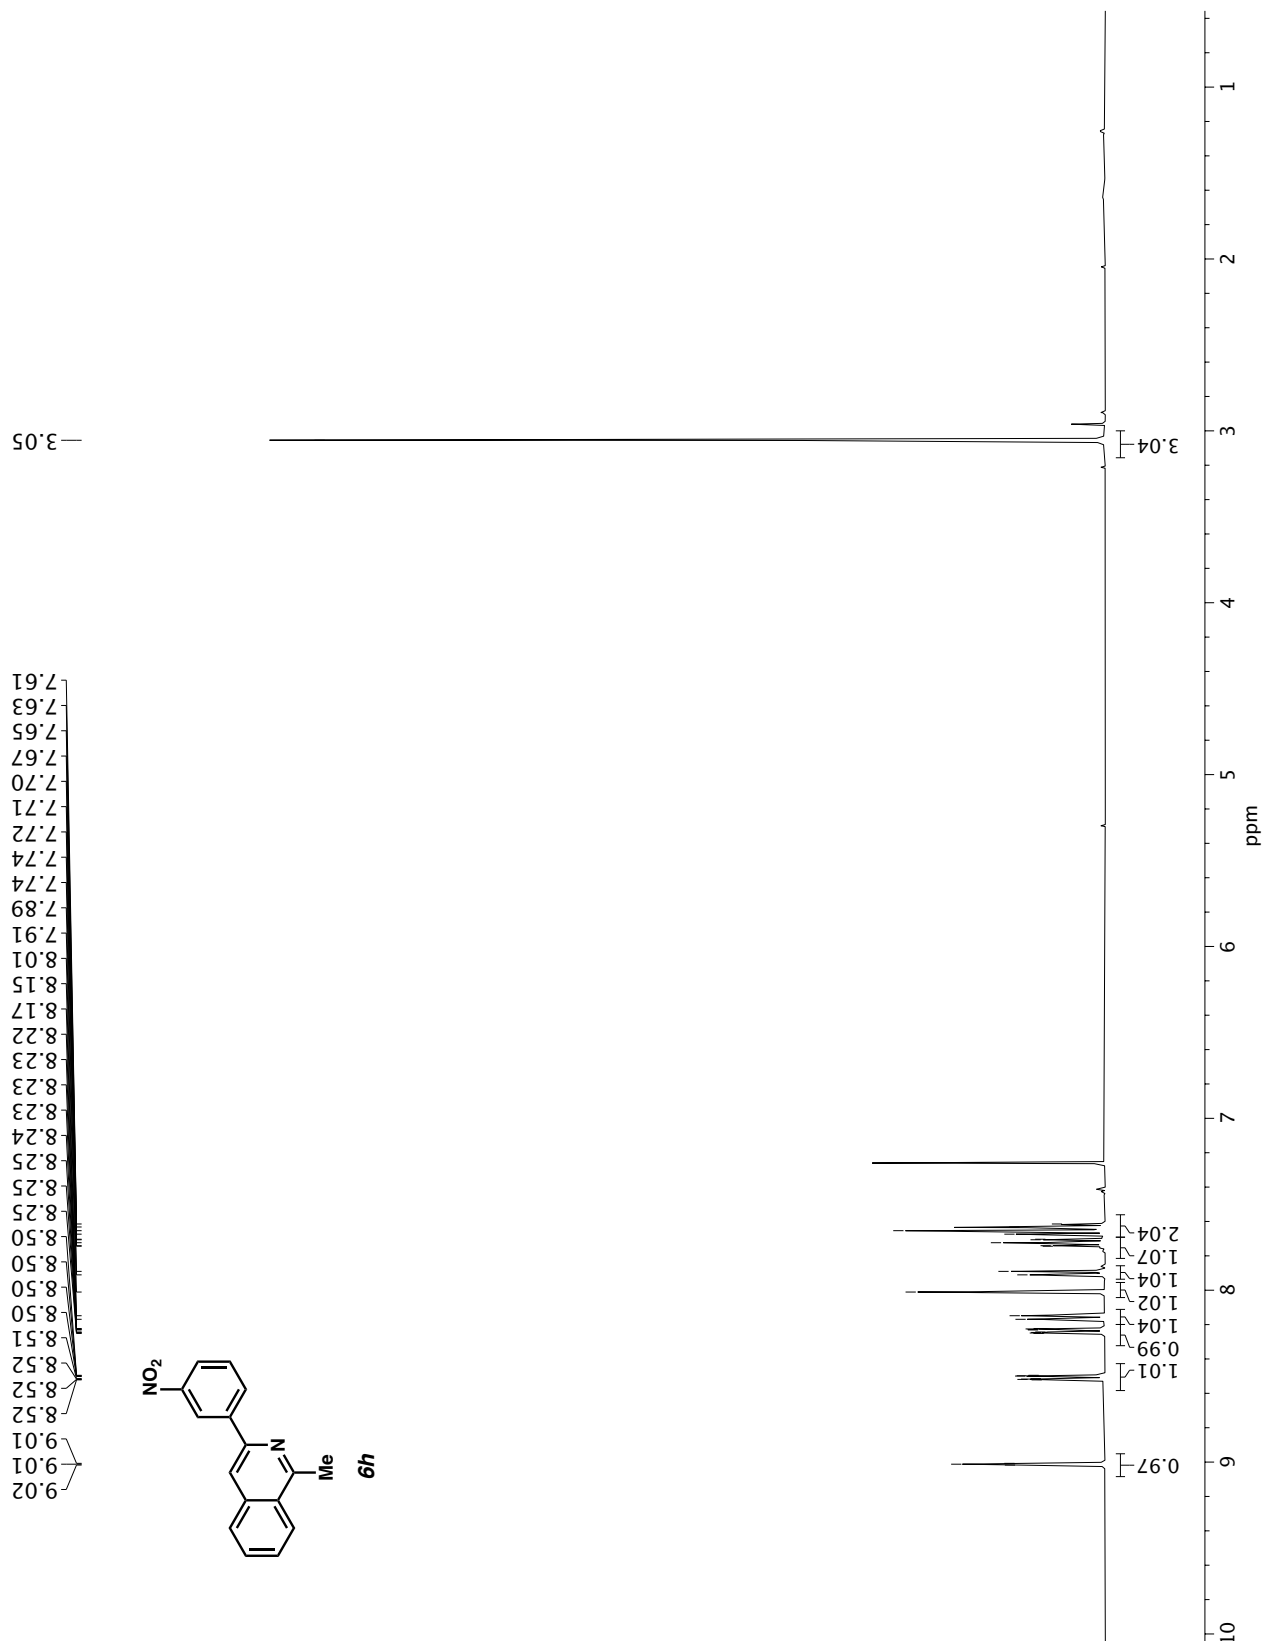

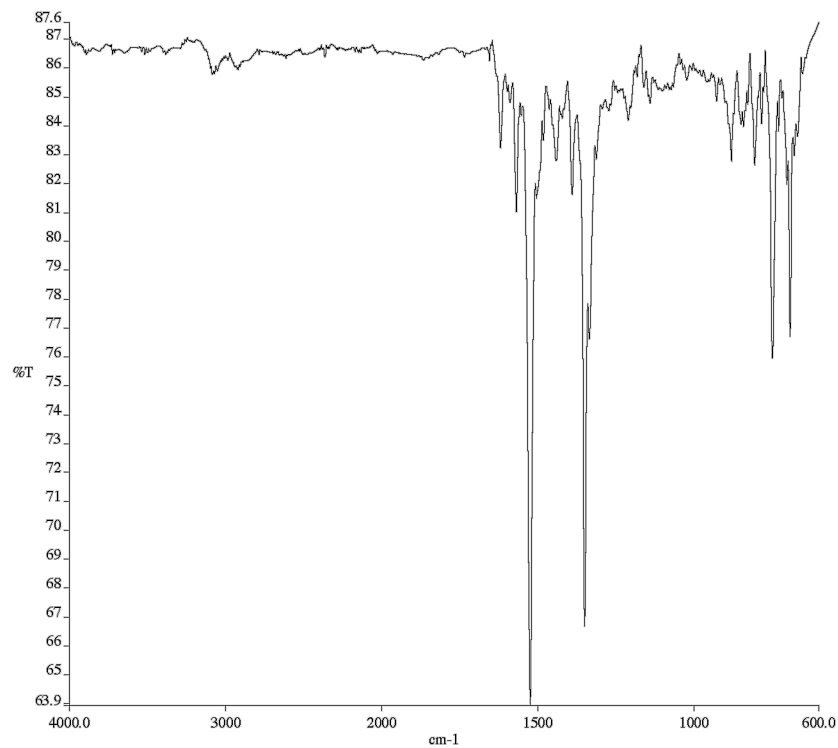

Infrared spectrum (Thin Film, NaCl) of **6h**.

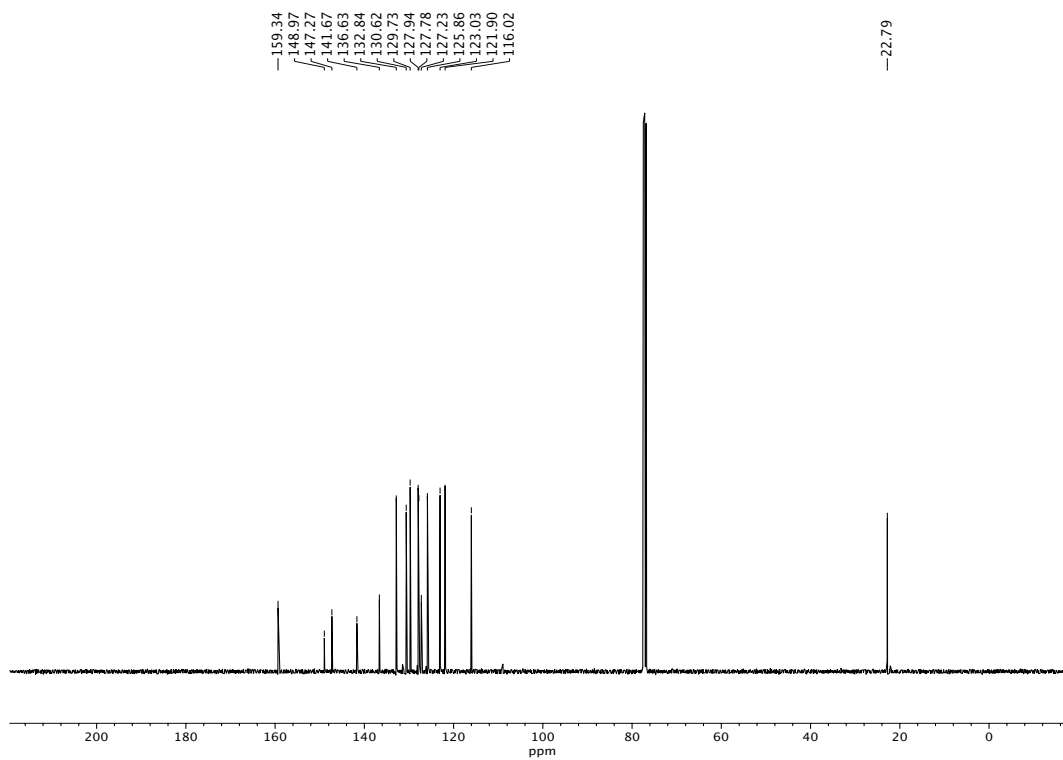

<sup>13</sup>C NMR (100 MHz, CDCl<sub>3</sub>) of **6h**.

8.14  
8.12  
7.86  
7.83  
7.80  
7.78  
7.78  
7.72  
7.70  
7.68  
7.63  
7.61  
7.61  
7.59

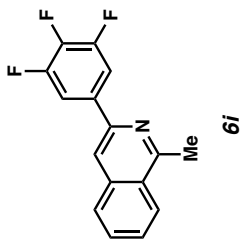

3.02

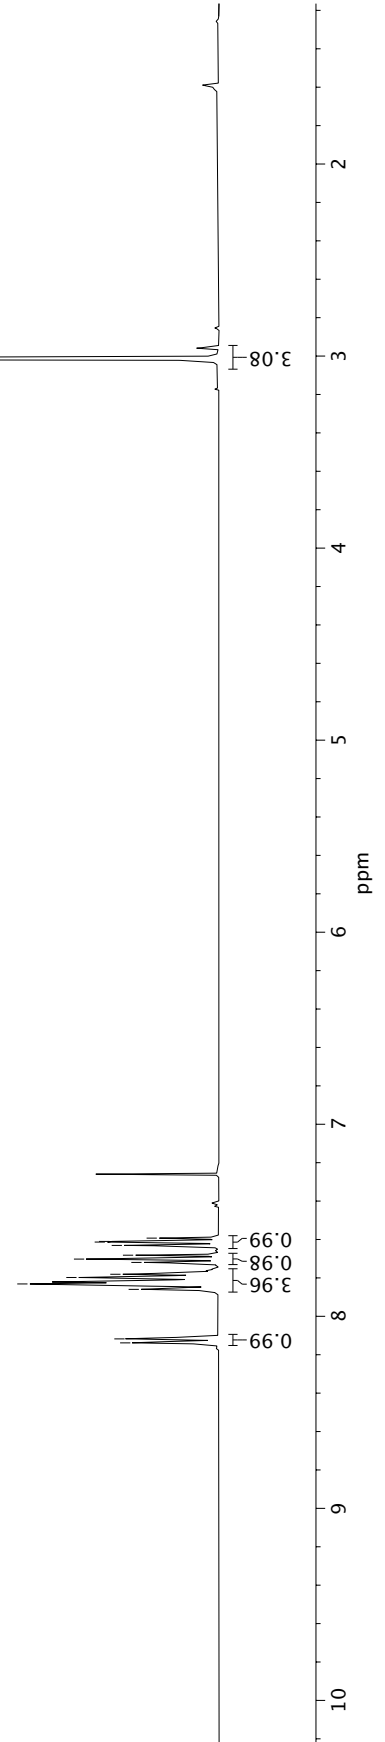

<sup>1</sup>H NMR (400 MHz, CDCl<sub>3</sub>) of compound **6i**.

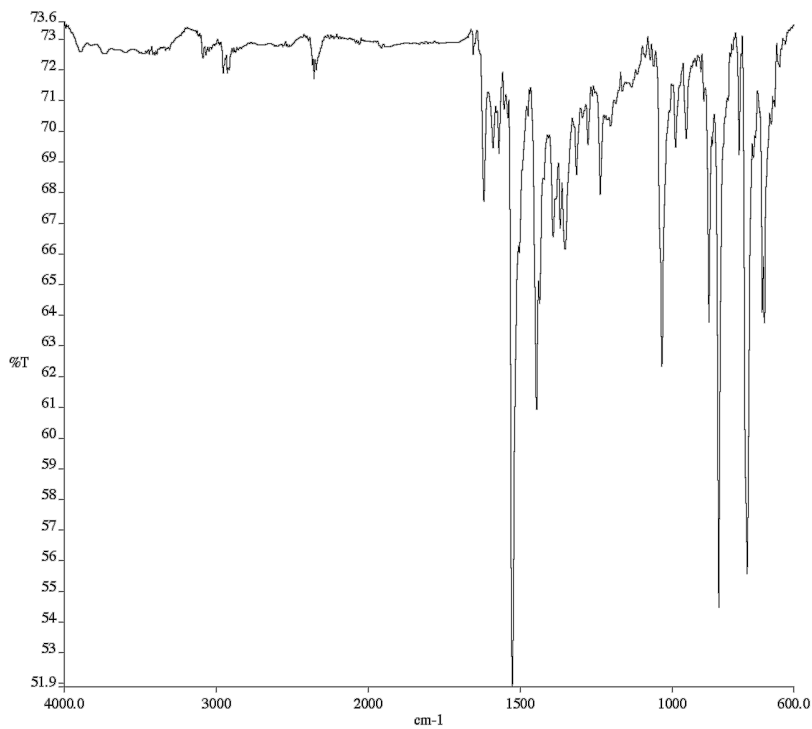

Infrared spectrum (Thin Film, NaCl) of **6i**.

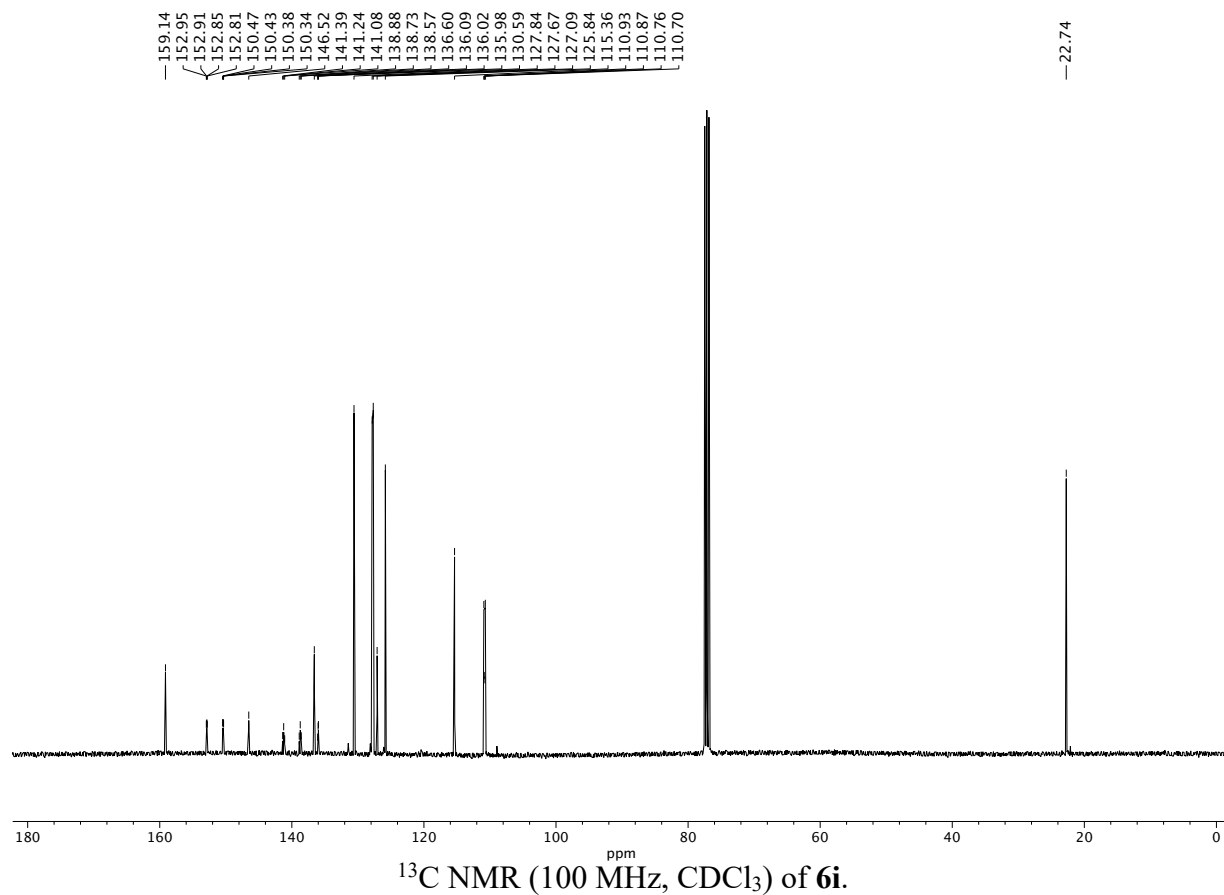

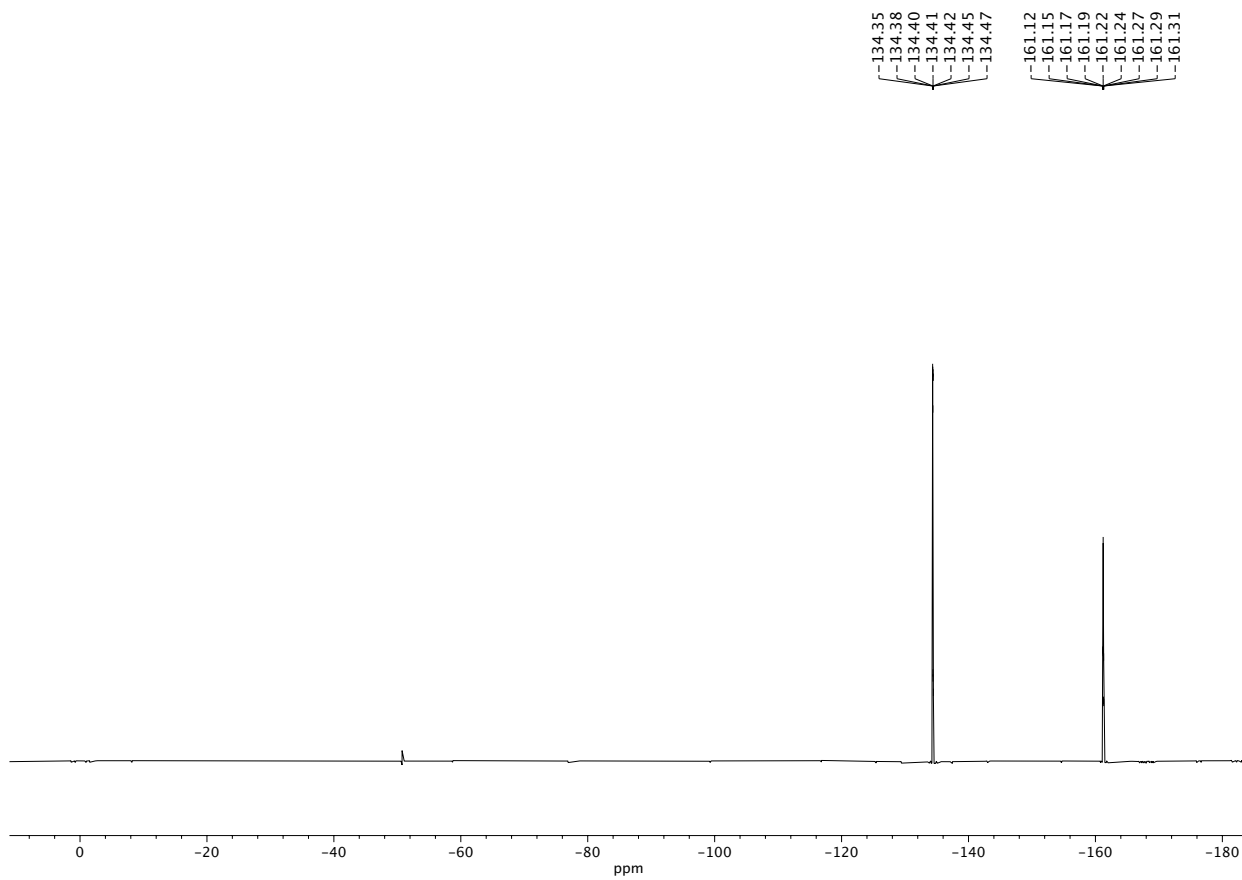

$^{19}\text{F}$  NMR (282 MHz,  $\text{CDCl}_3$ ) of **6i**.

<sup>1</sup>H NMR (400 MHz, CDCl<sub>3</sub>) of compound **6j**.

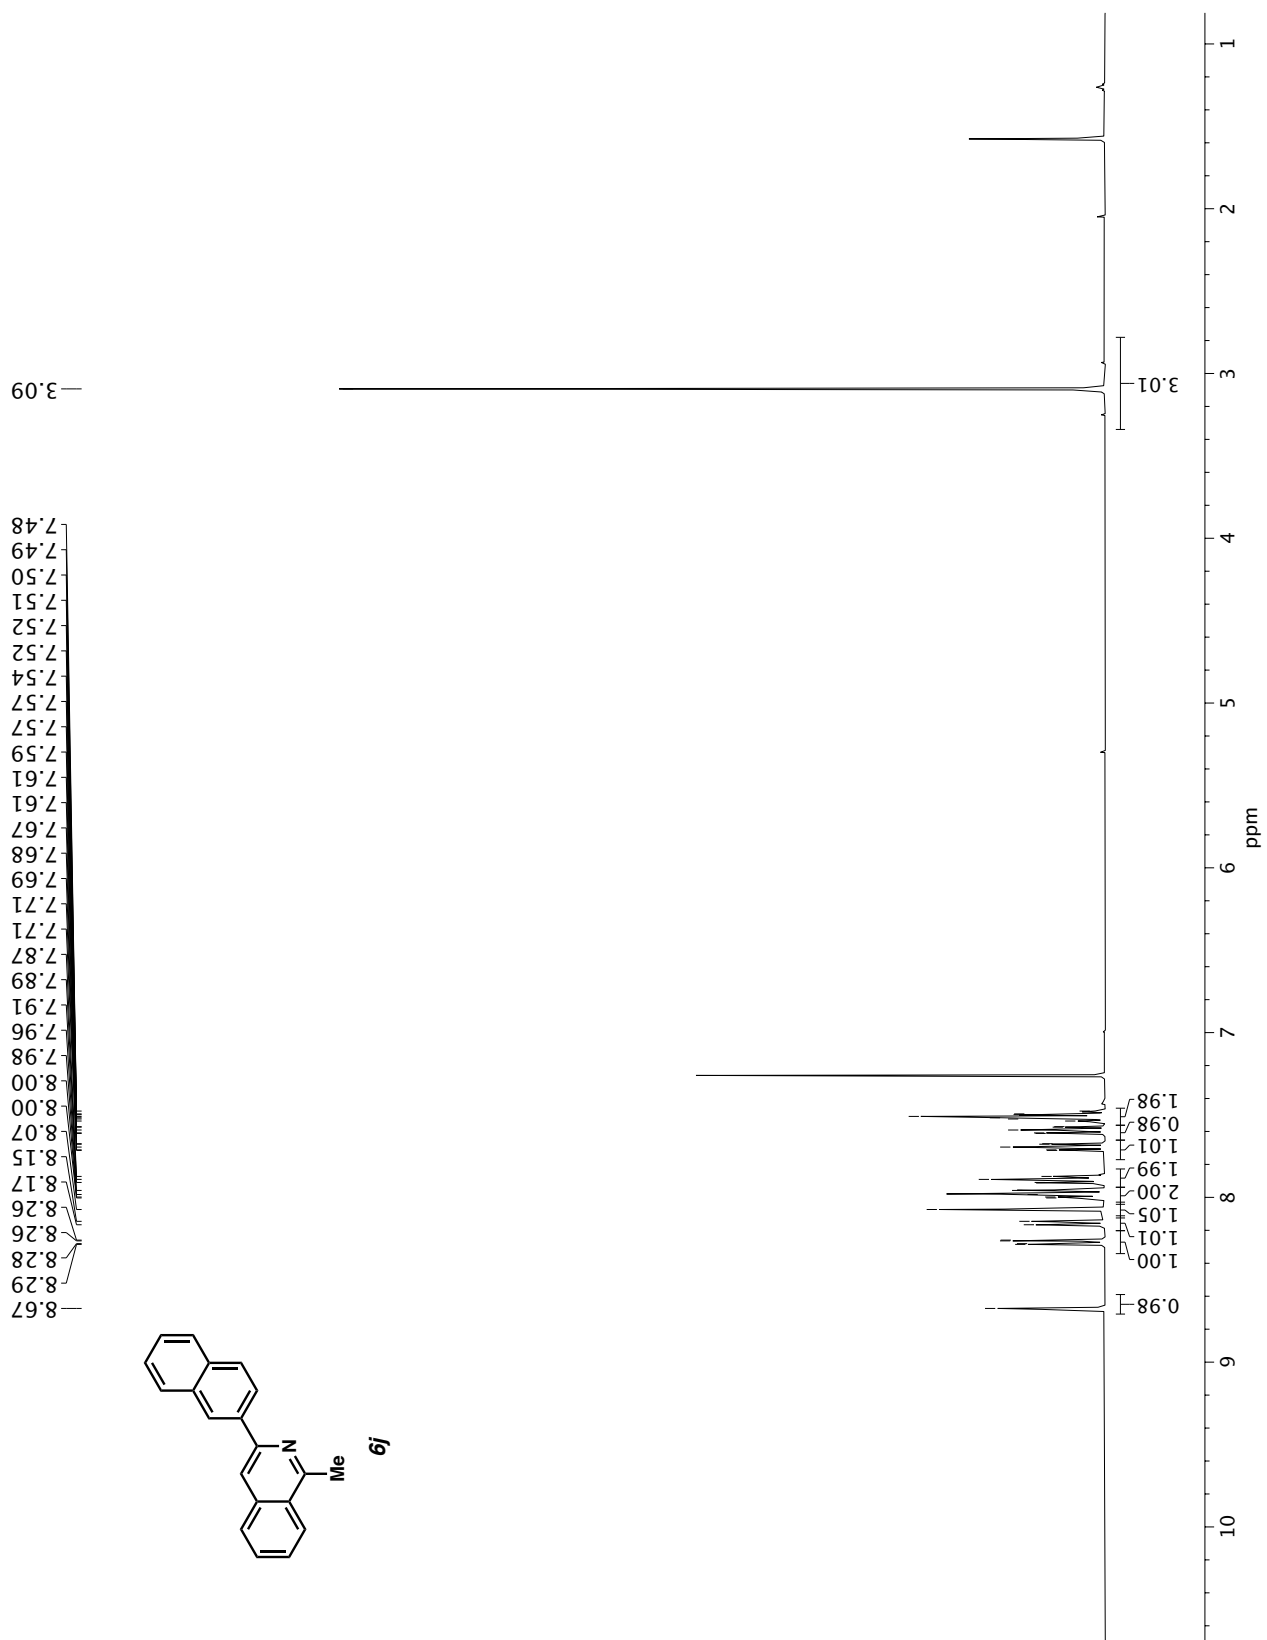



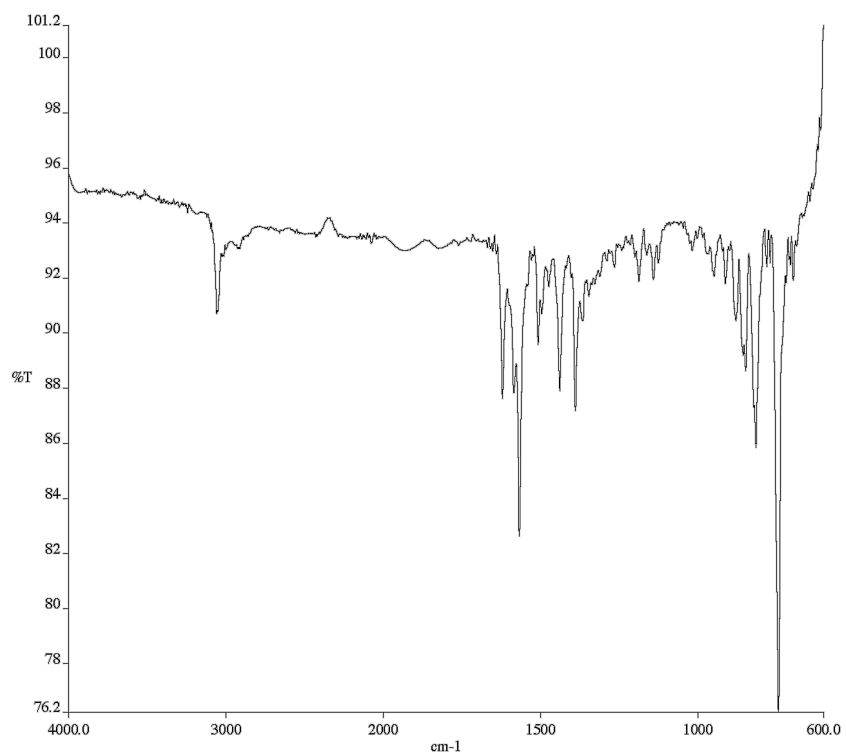

Infrared spectrum (Thin Film, NaCl) of **6j**.

— 158.85  
 — 149.92  
 — 137.22  
 — 136.95  
 — 133.86  
 — 133.53  
 — 130.24  
 — 128.85  
 — 128.48  
 — 127.82  
 — 127.79  
 — 127.00  
 — 126.81  
 — 126.30  
 — 126.29  
 — 125.84  
 — 124.91  
 — 115.68  
 — 22.90

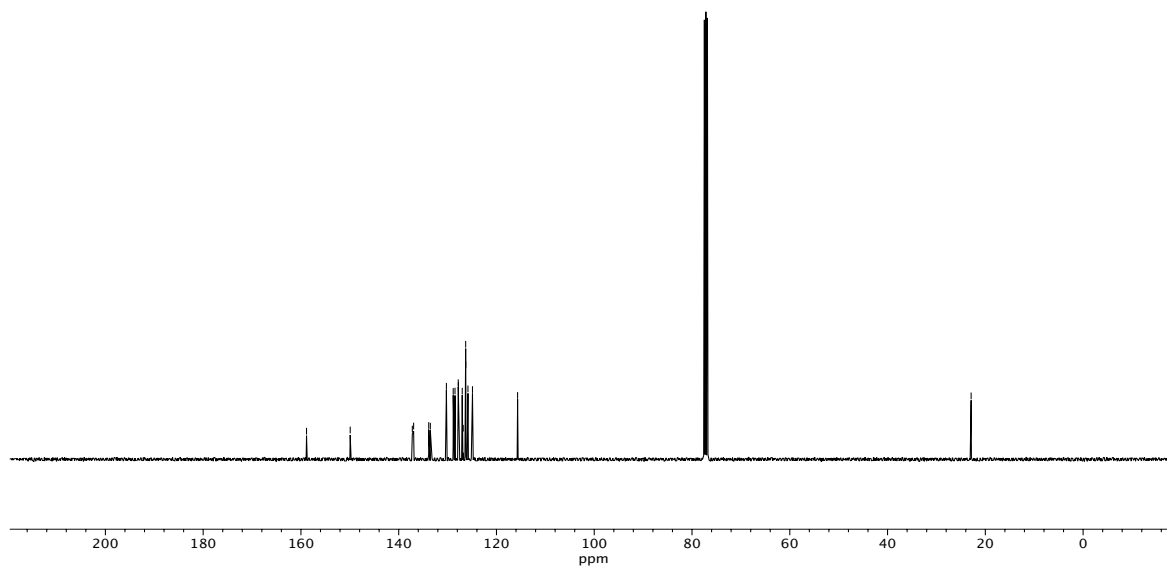

$^{13}\text{C}$  NMR (100 MHz,  $\text{CDCl}_3$ ) of **6j**.

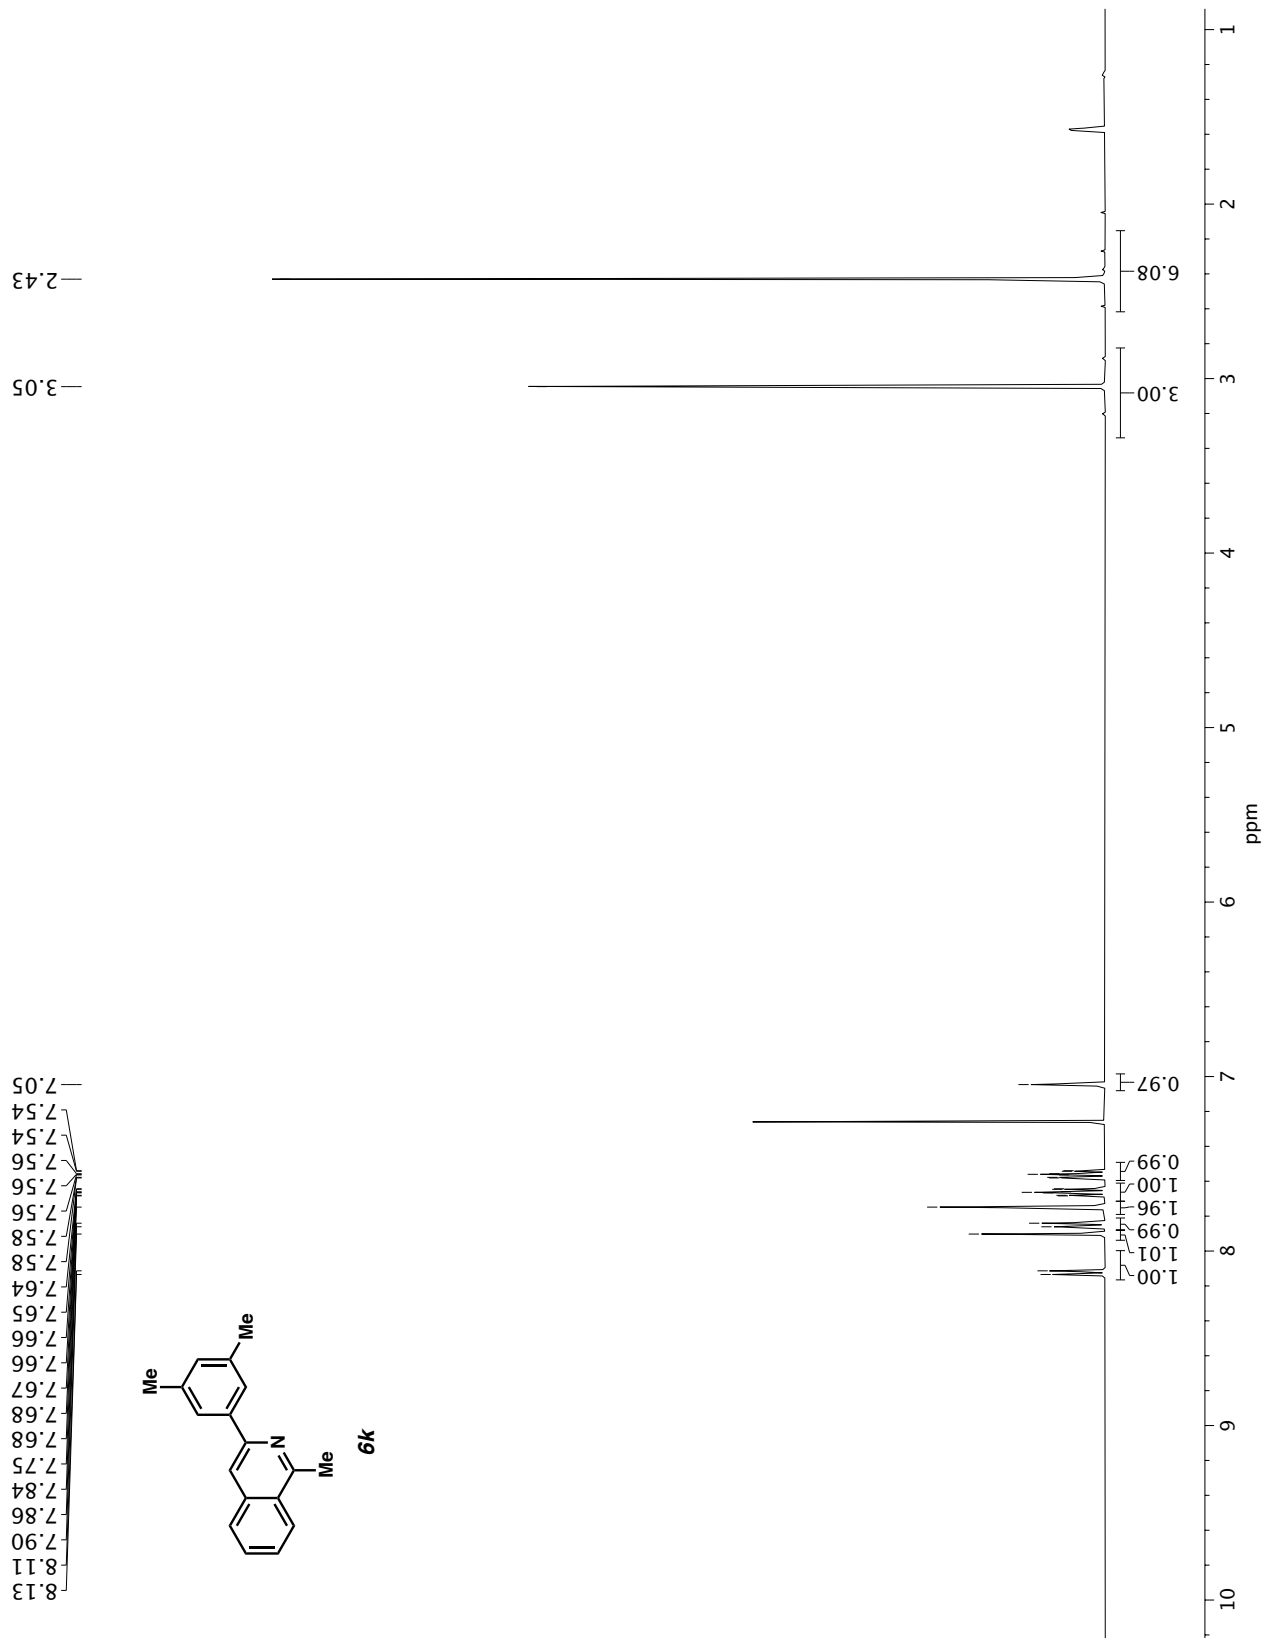

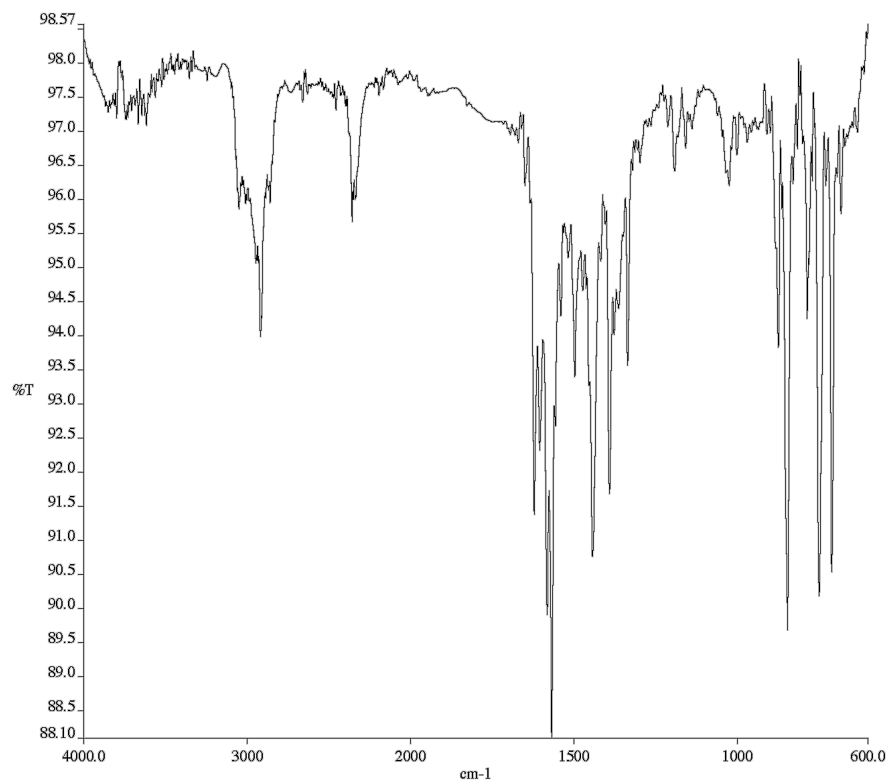

Infrared spectrum (Thin Film, NaCl) of **6k**.

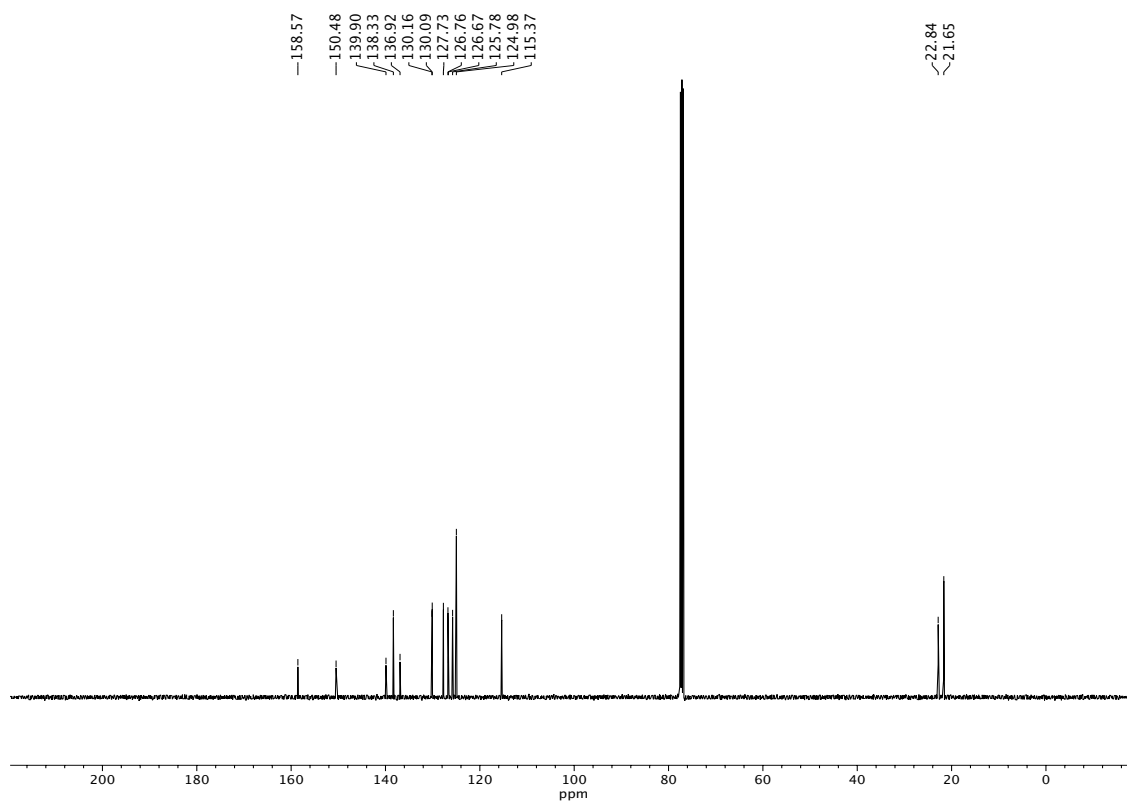

$^{13}\text{C}$  NMR (100 MHz,  $\text{CDCl}_3$ ) of **6k**.

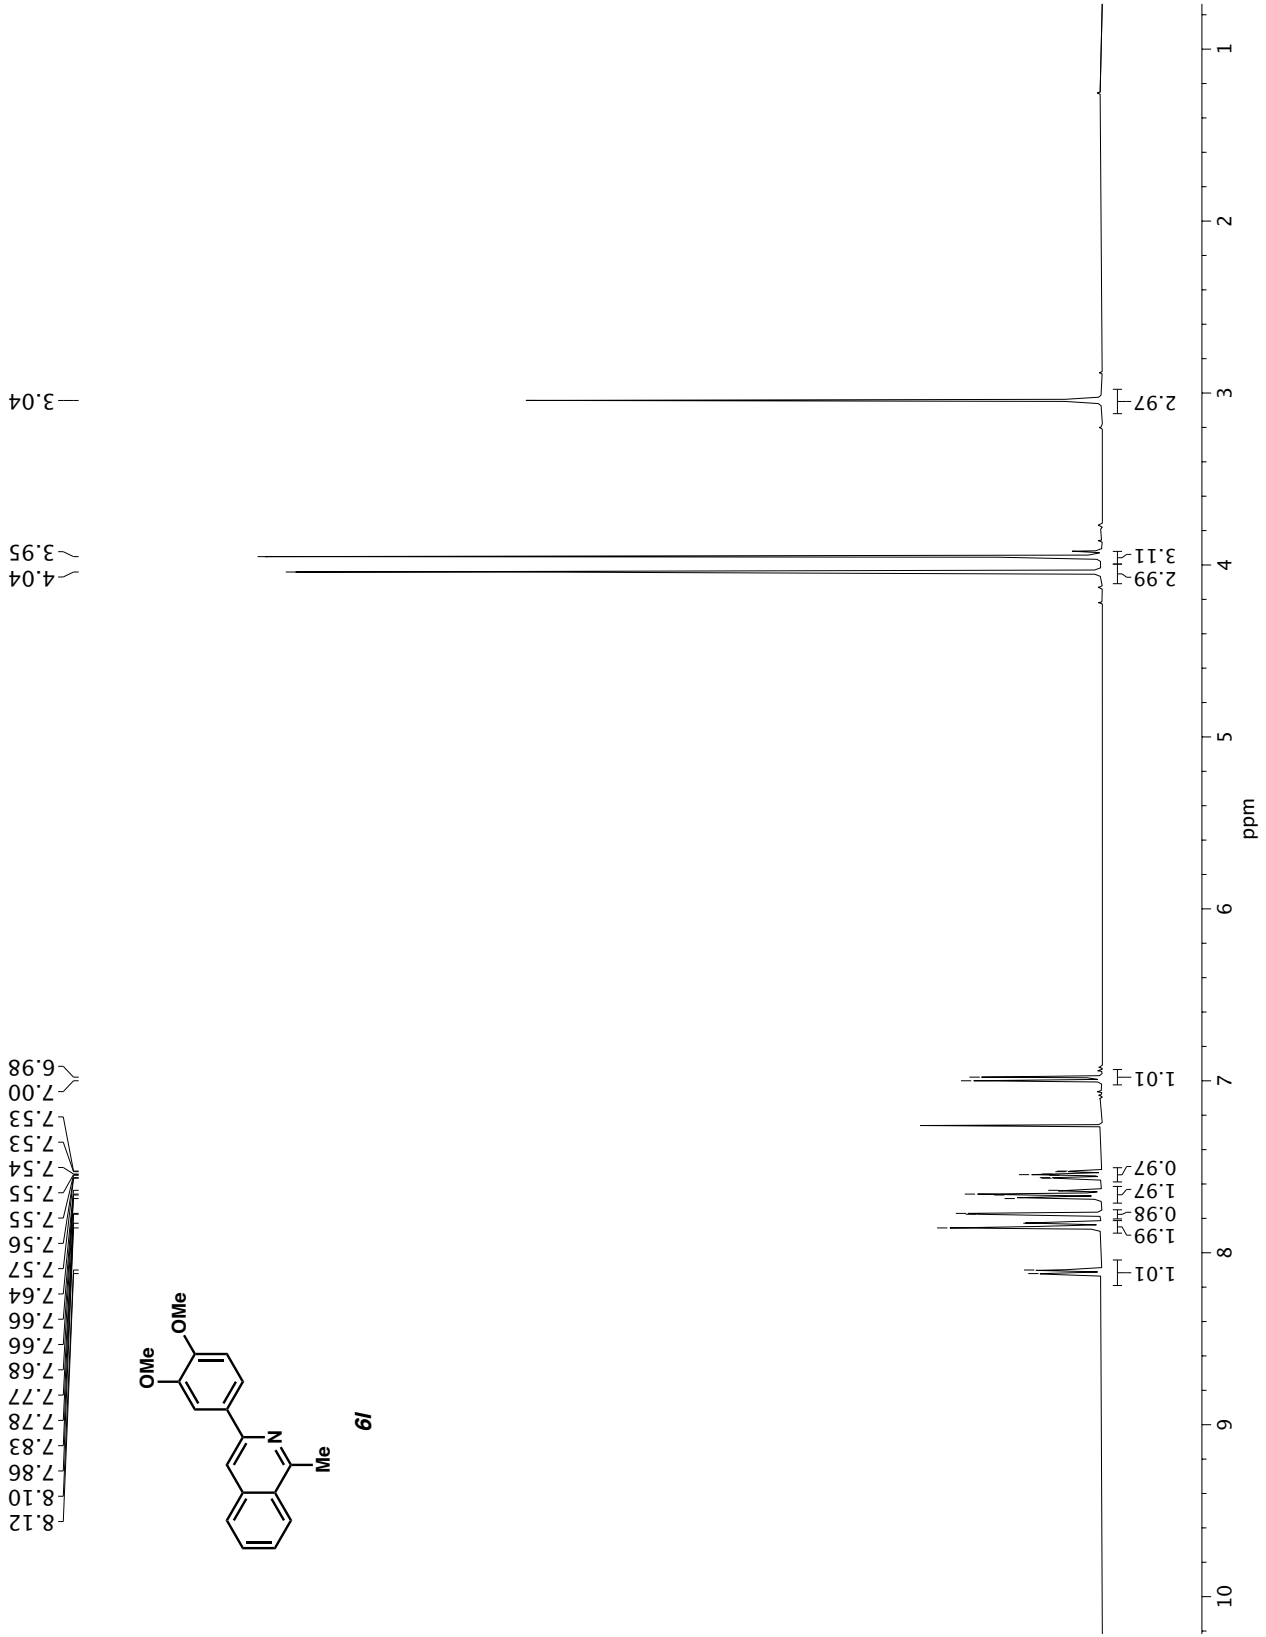

<sup>1</sup>H NMR (400 MHz, CDCl<sub>3</sub>) of compound **6l**.

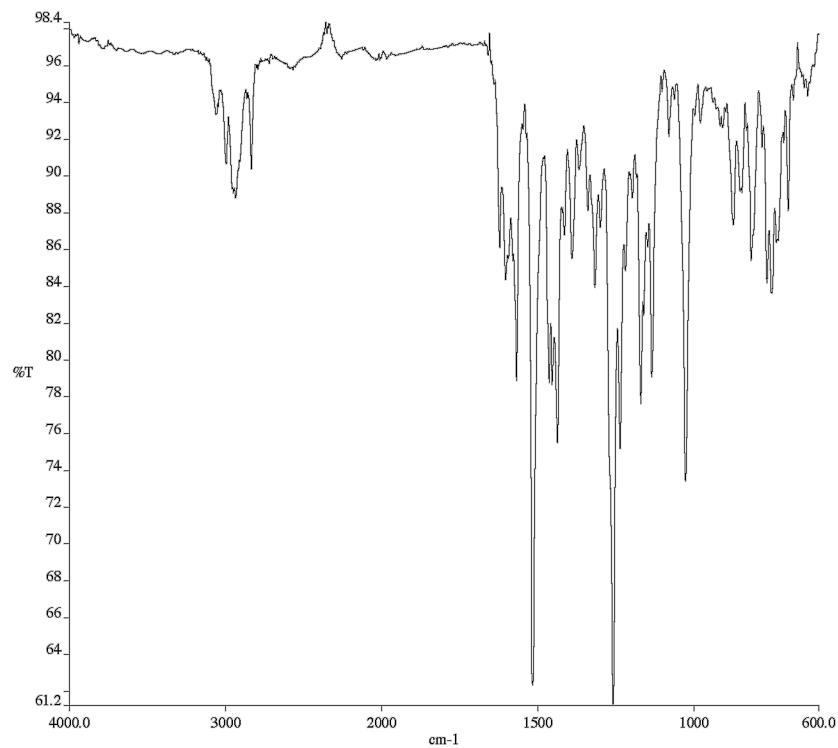

Infrared spectrum (Thin Film, NaCl) of **6I**.

158.57  
 149.77  
 149.60  
 149.32  
 136.99  
 132.88  
 130.19  
 127.59  
 126.65  
 126.45  
 125.80  
 119.54  
 114.52  
 111.36  
 110.26  
 56.12  
 22.79

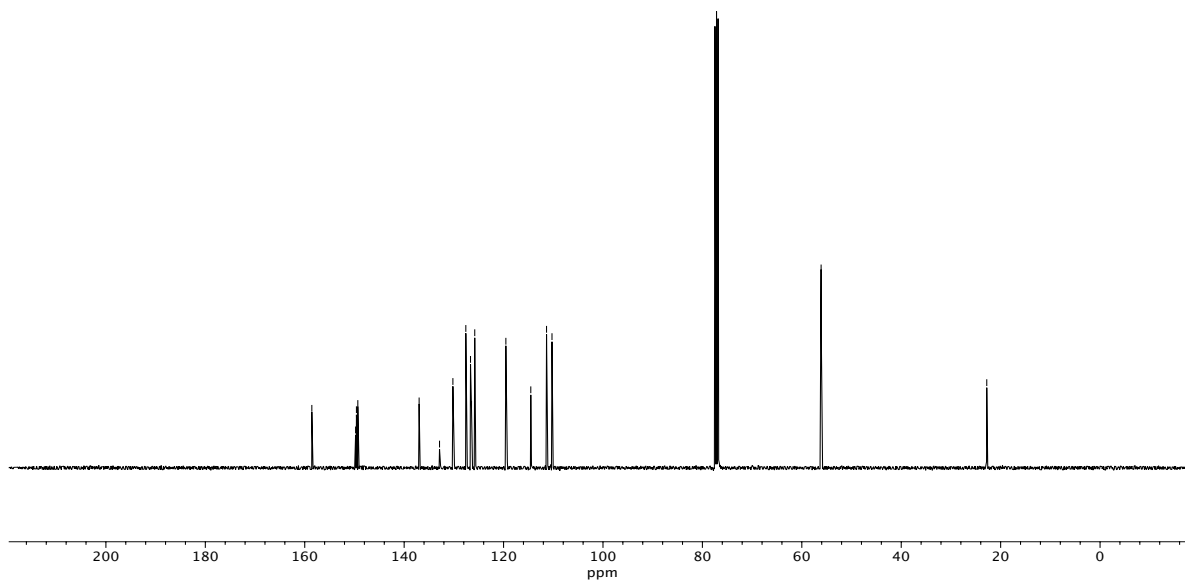

<sup>13</sup>C NMR (100 MHz, CDCl<sub>3</sub>) of **6I**.

<sup>1</sup>H NMR (400 MHz, CDCl<sub>3</sub>) of compound **6m**.

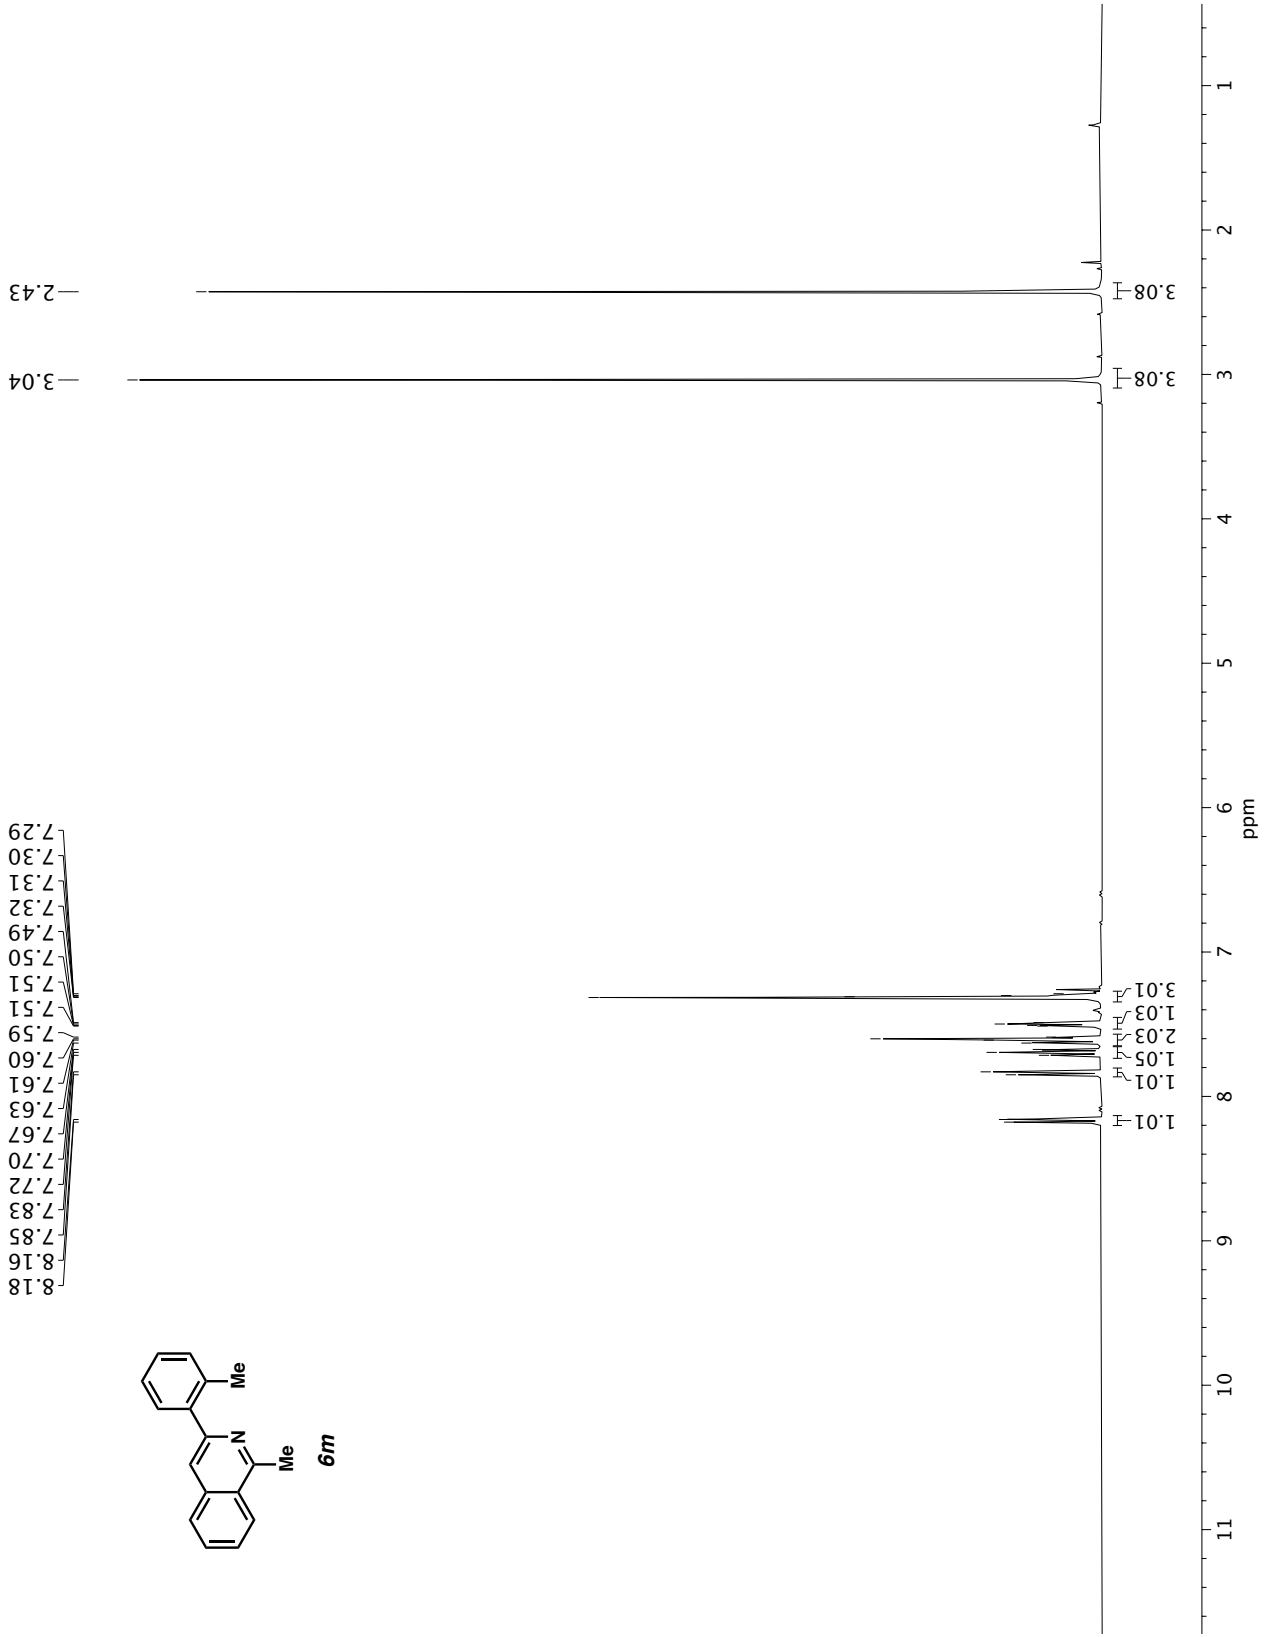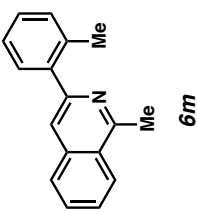

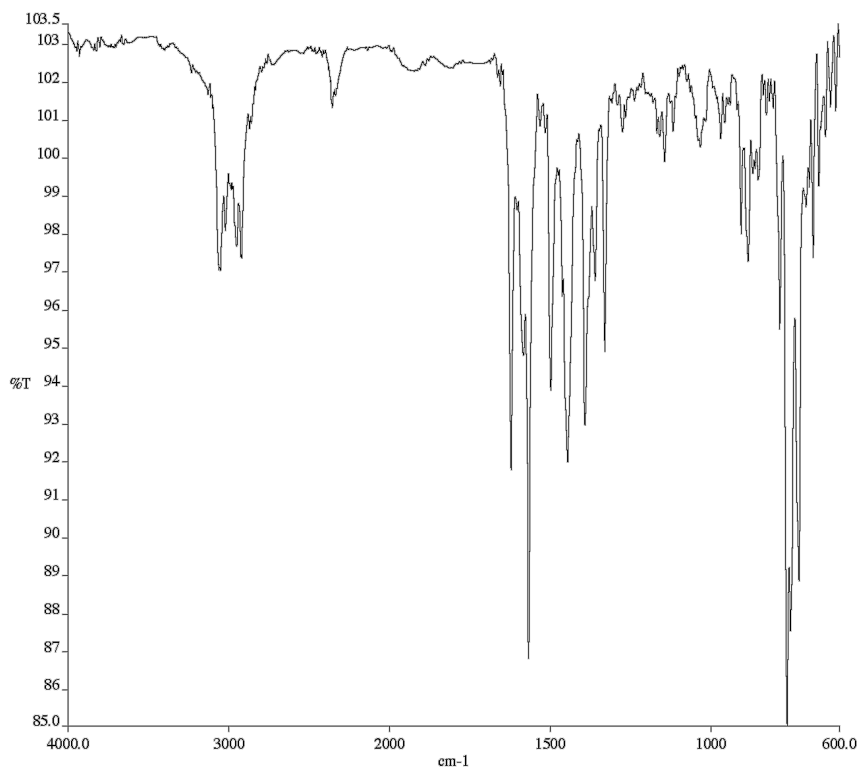

Infrared spectrum (Thin Film, NaCl) of **6m**.

158.09  
 152.69  
 140.90  
 136.49  
 136.28  
 130.85  
 130.12  
 130.10  
 128.07  
 127.53  
 126.95  
 126.17  
 126.00  
 125.74  
 118.88  
 22.63  
 20.63

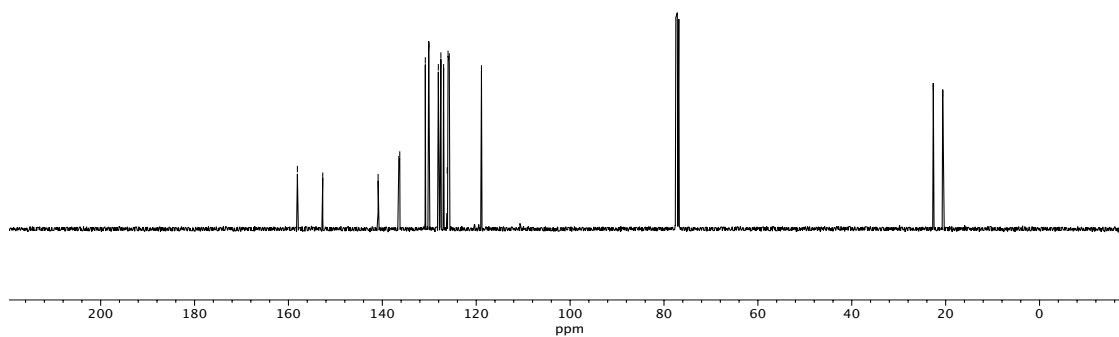

$^{13}\text{C}$  NMR (100 MHz,  $\text{CDCl}_3$ ) of **6m**.

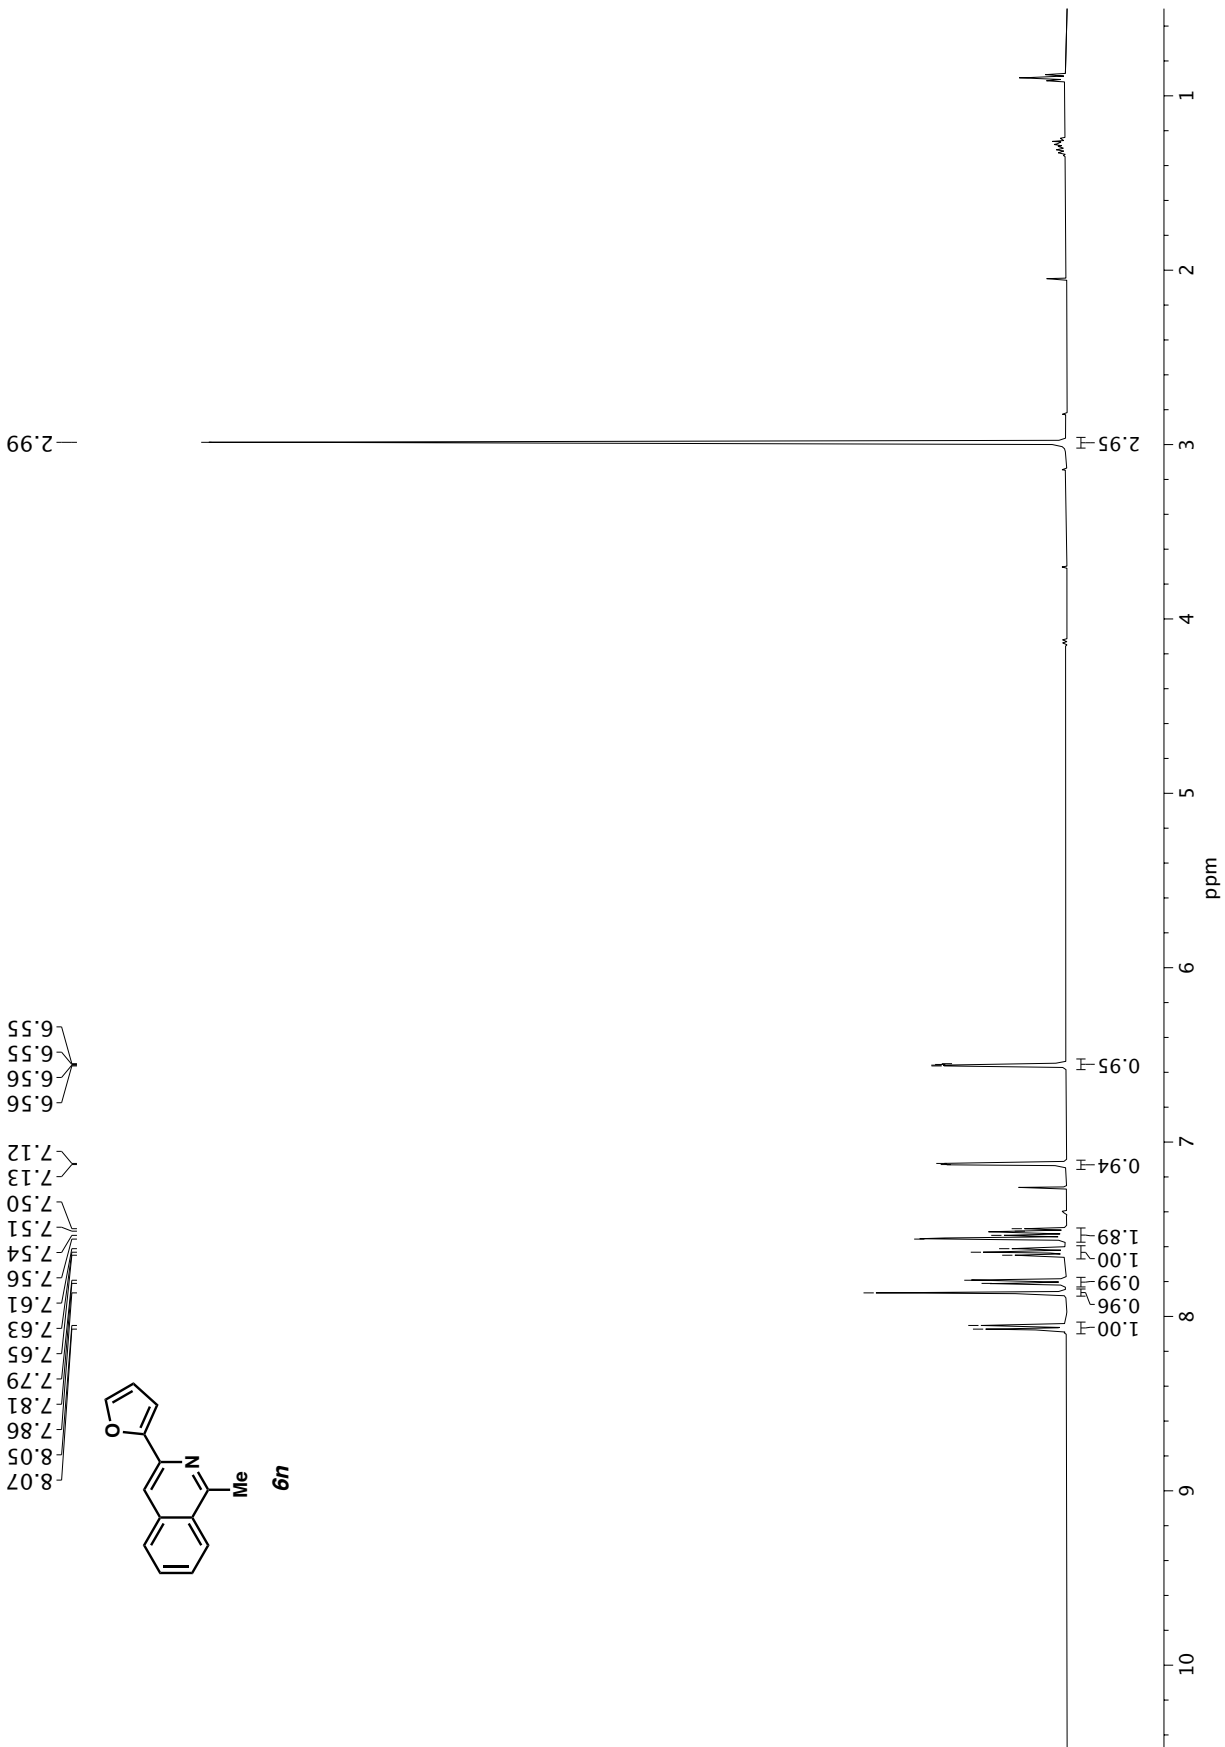



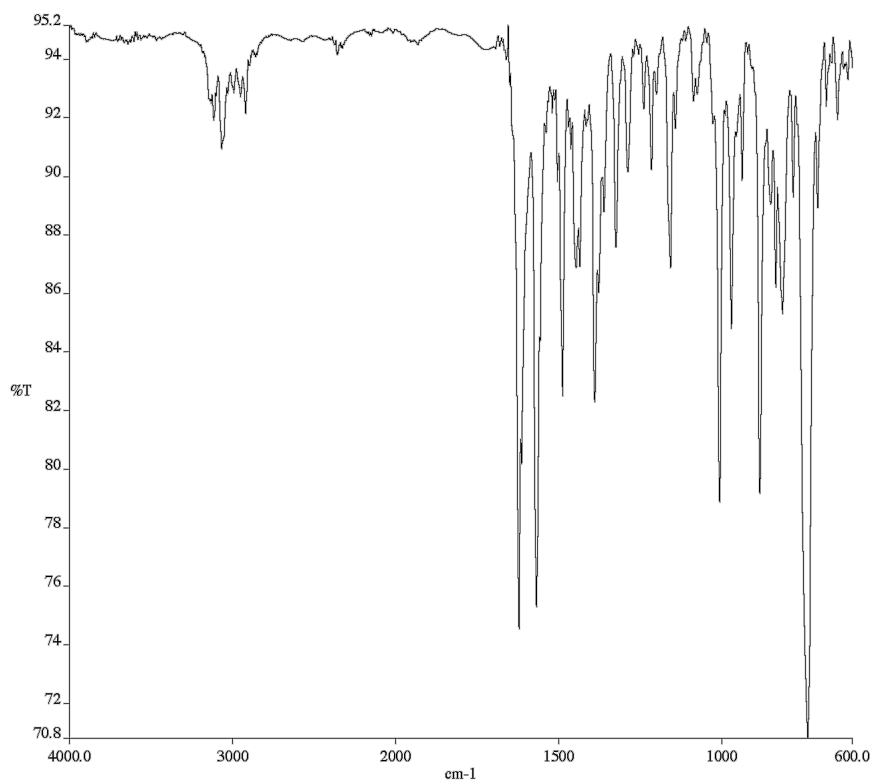

Infrared spectrum (Thin Film, NaCl) of **6n**.

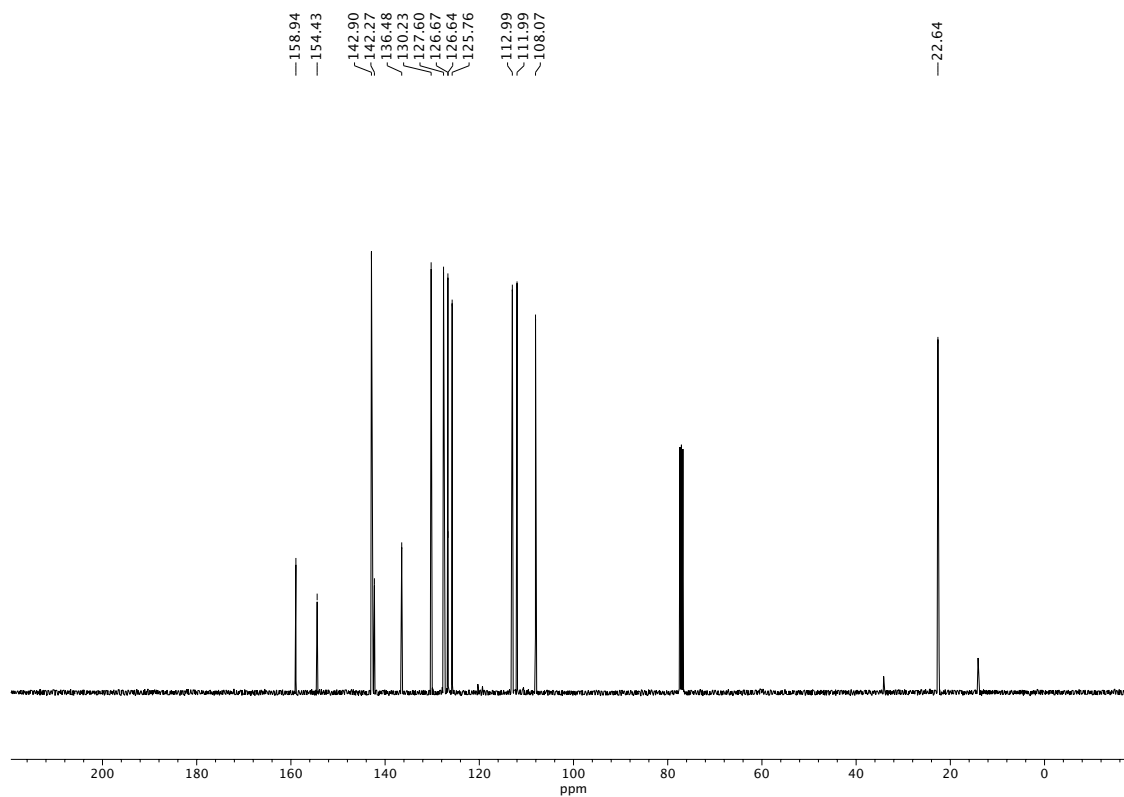

$^{13}\text{C}$  NMR (100 MHz,  $\text{CDCl}_3$ ) of **6n**.

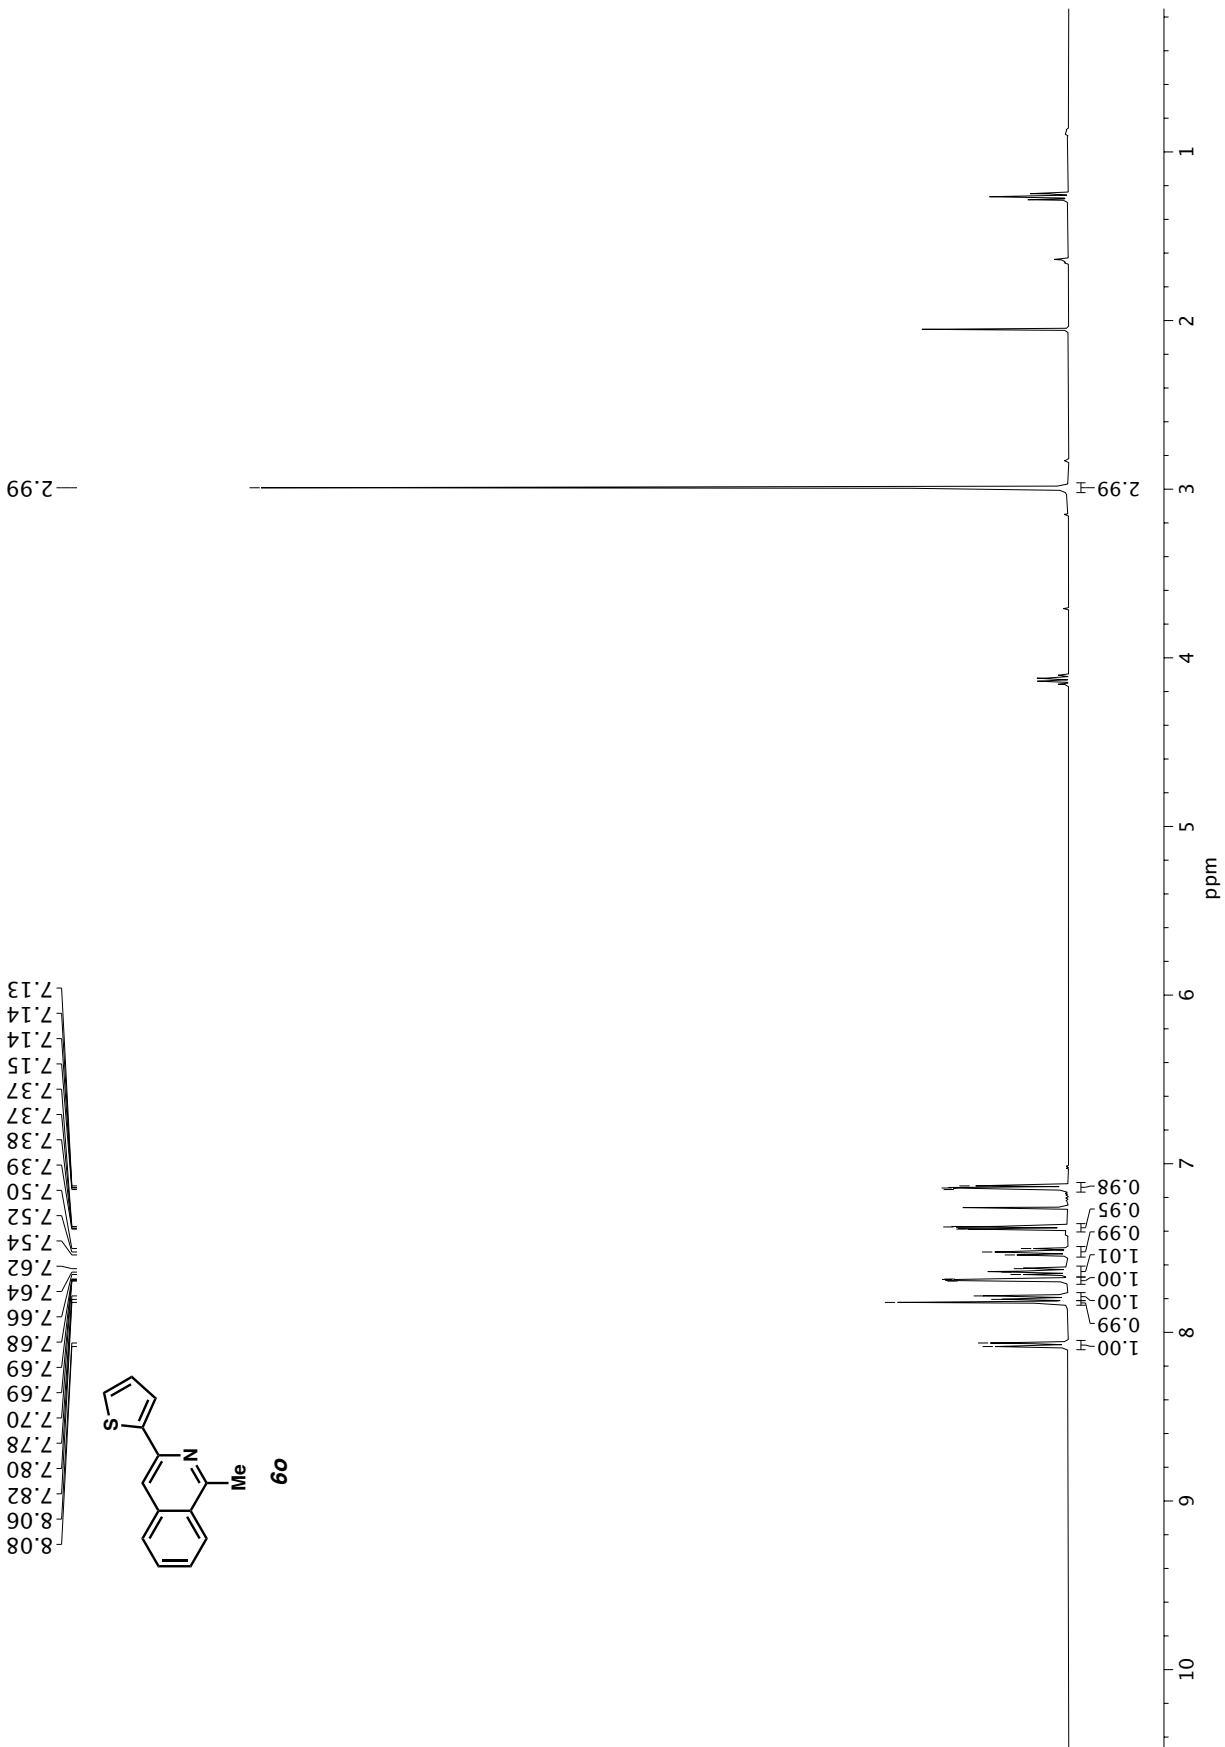

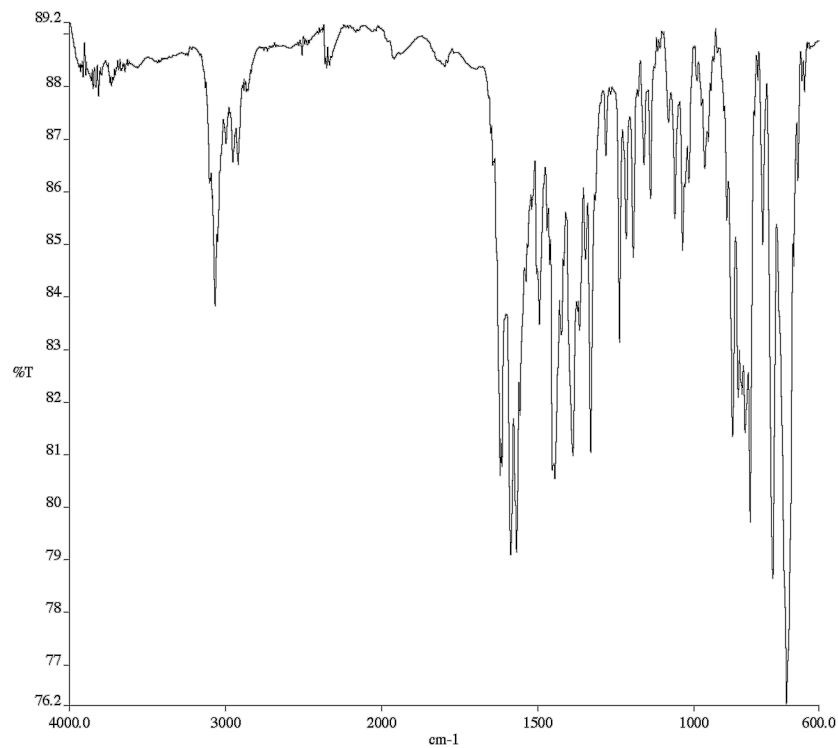

Infrared spectrum (Thin Film, NaCl) of **60**.

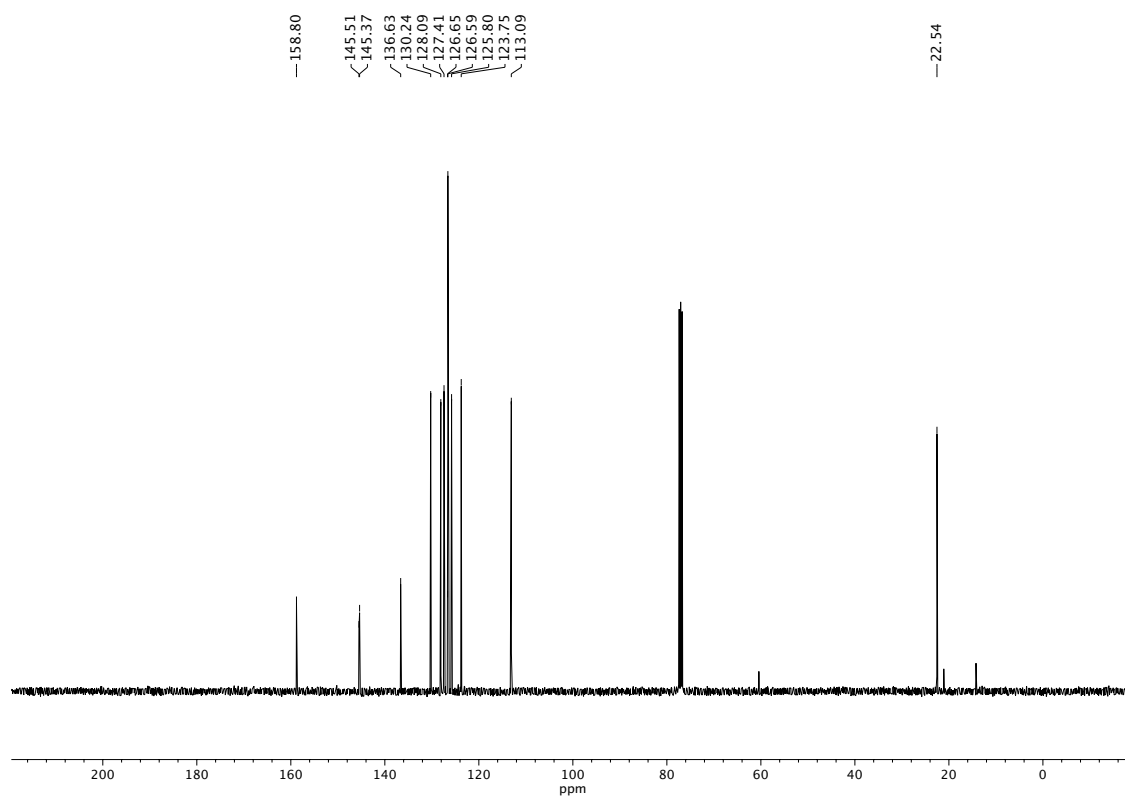

$^{13}\text{C}$  NMR (100 MHz,  $\text{CDCl}_3$ ) of **60**.

<sup>1</sup>H NMR (400 MHz, CDCl<sub>3</sub>) of compound **6p**.

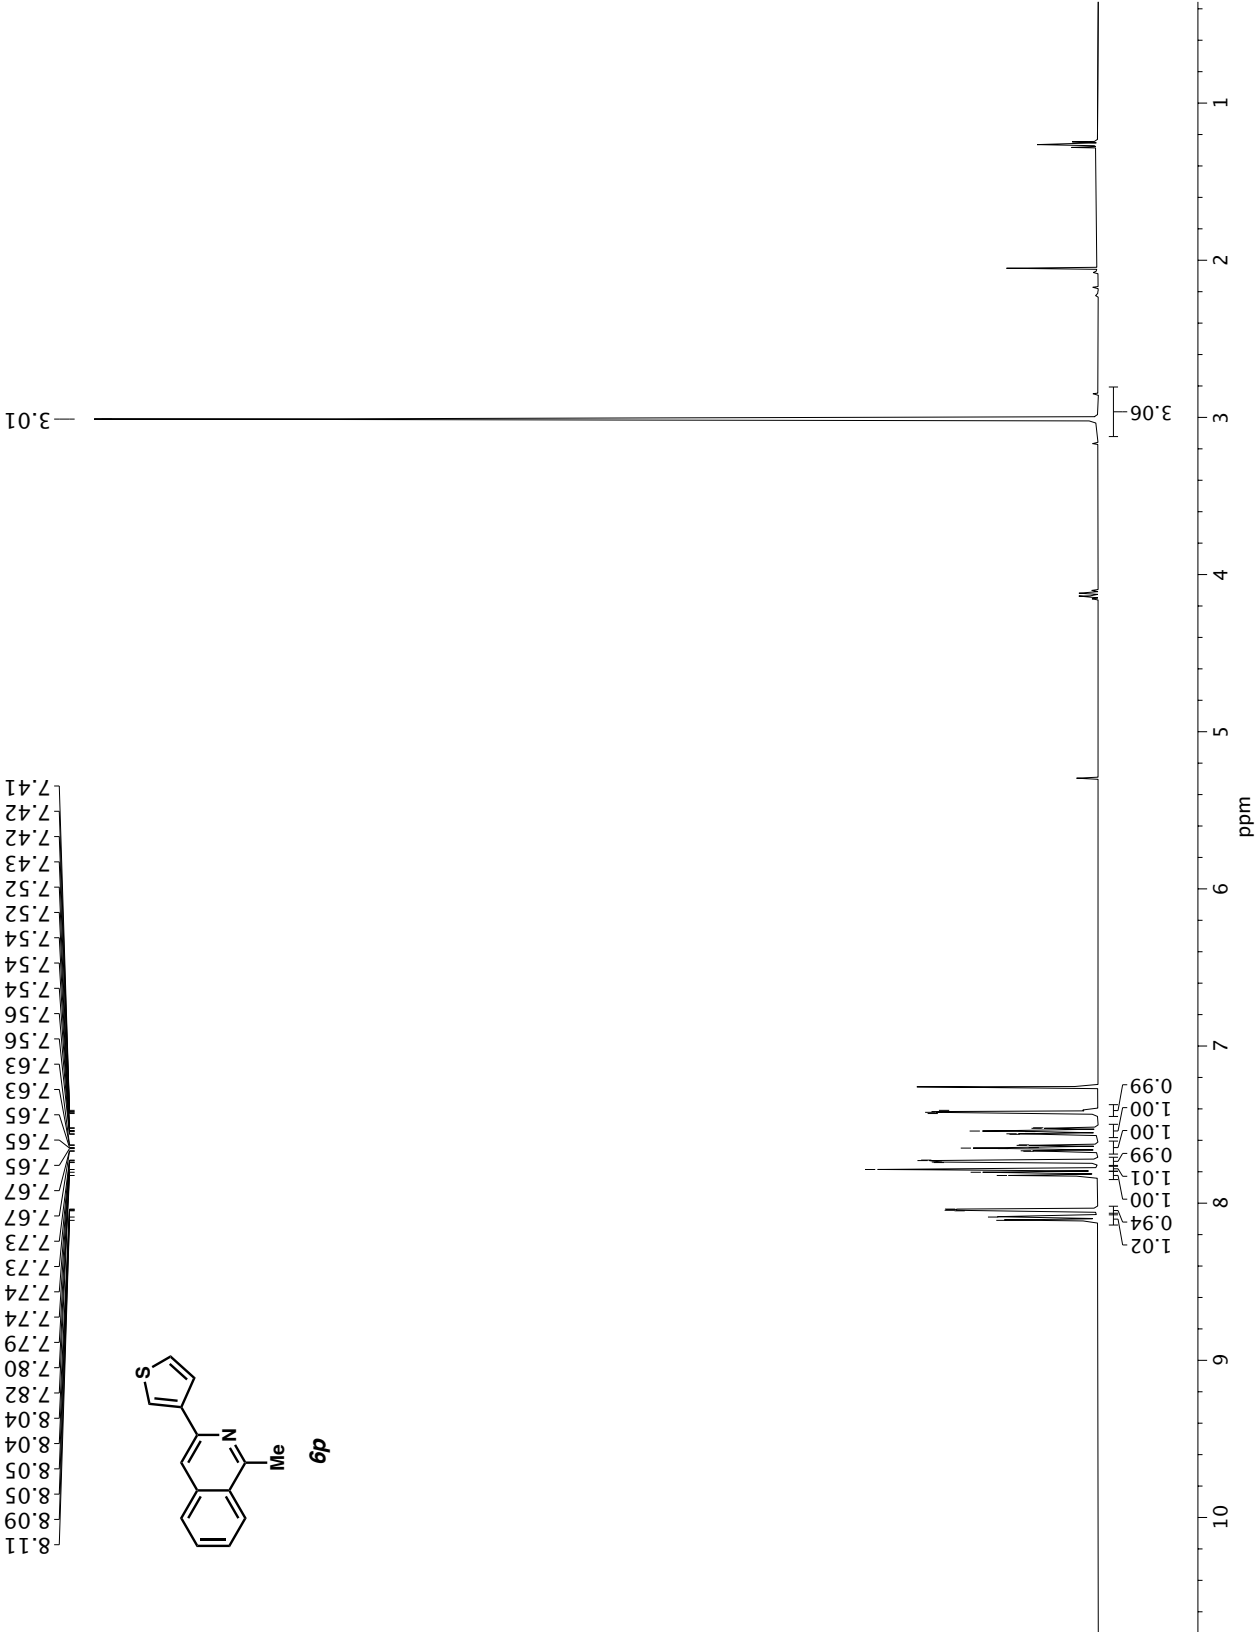

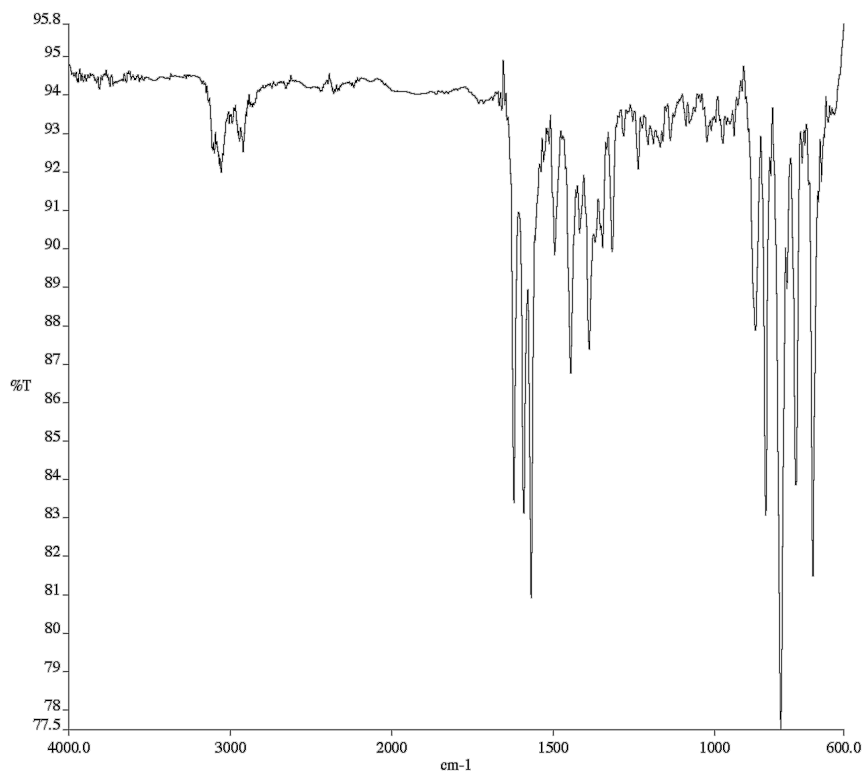

Infrared spectrum (Thin Film, NaCl) of **6p**.

158.83  
146.41  
142.68  
136.86  
130.20  
127.56  
126.67  
126.62  
126.32  
126.21  
125.83  
123.17  
114.67

22.79

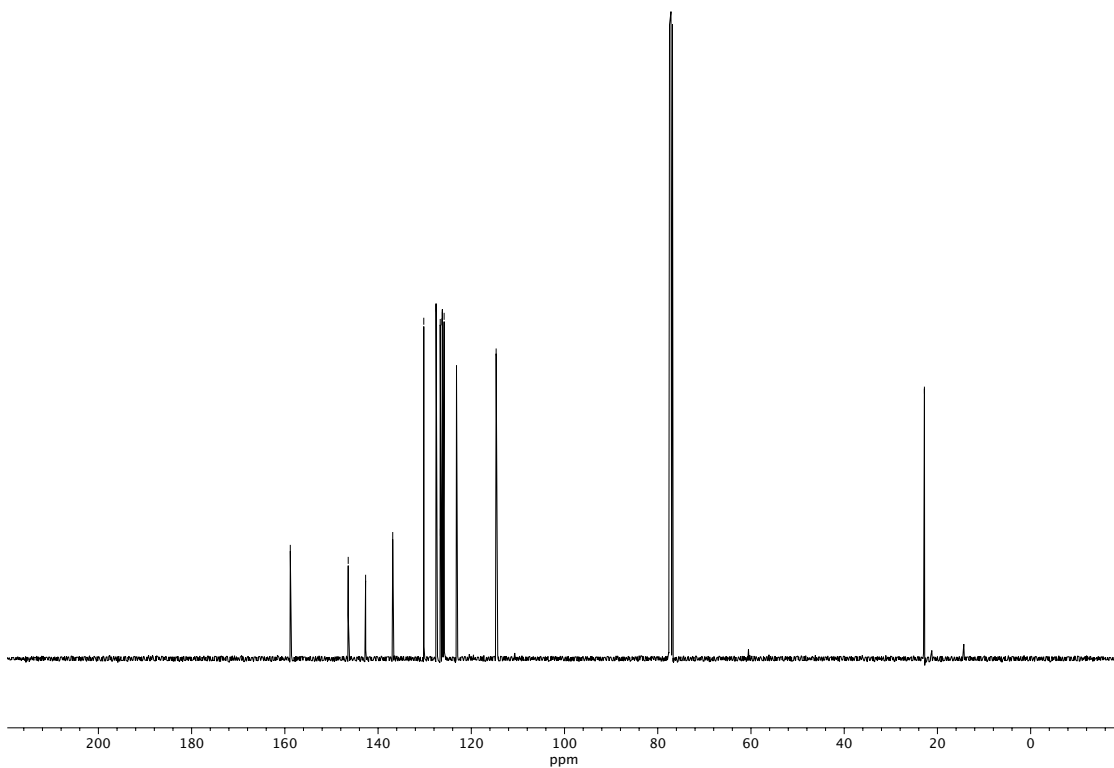

$^{13}\text{C}$  NMR (100 MHz,  $\text{CDCl}_3$ ) of **6p**.

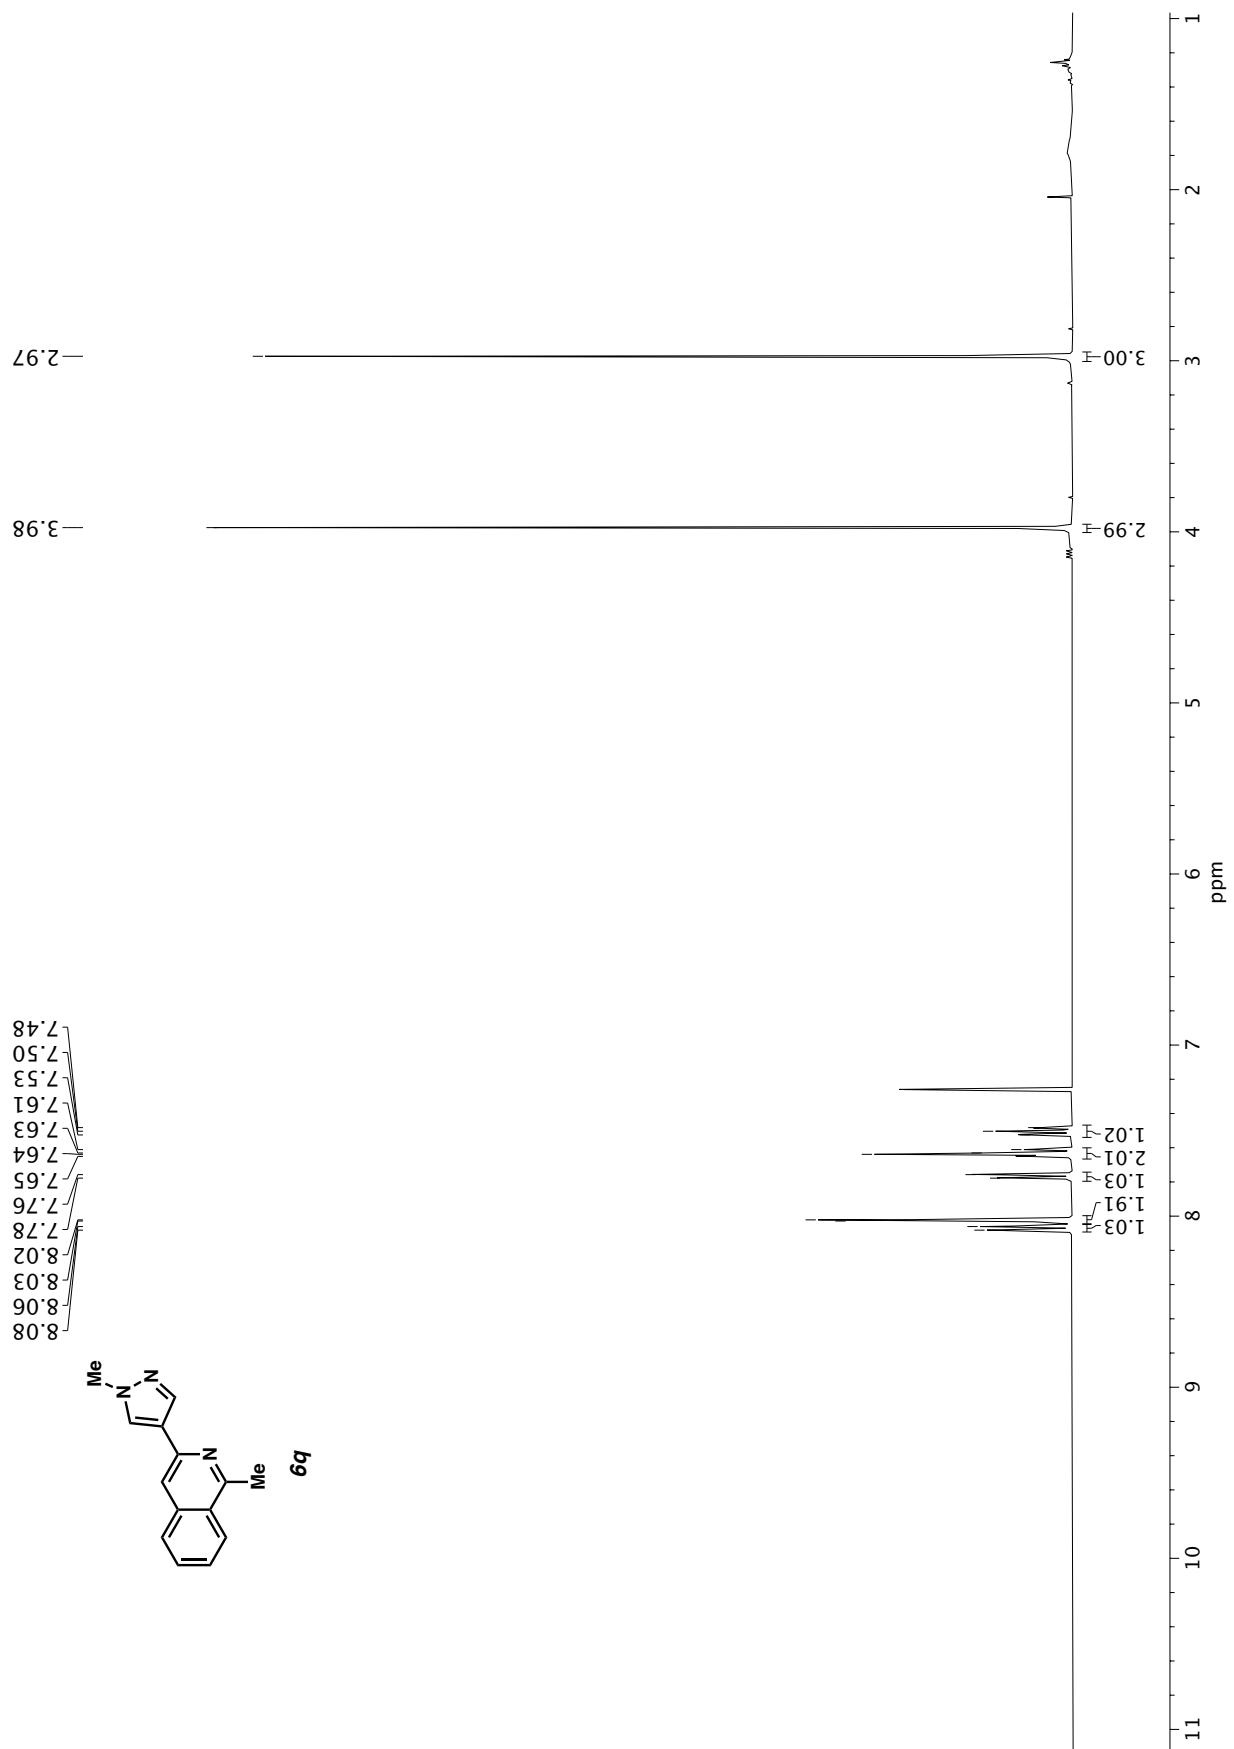

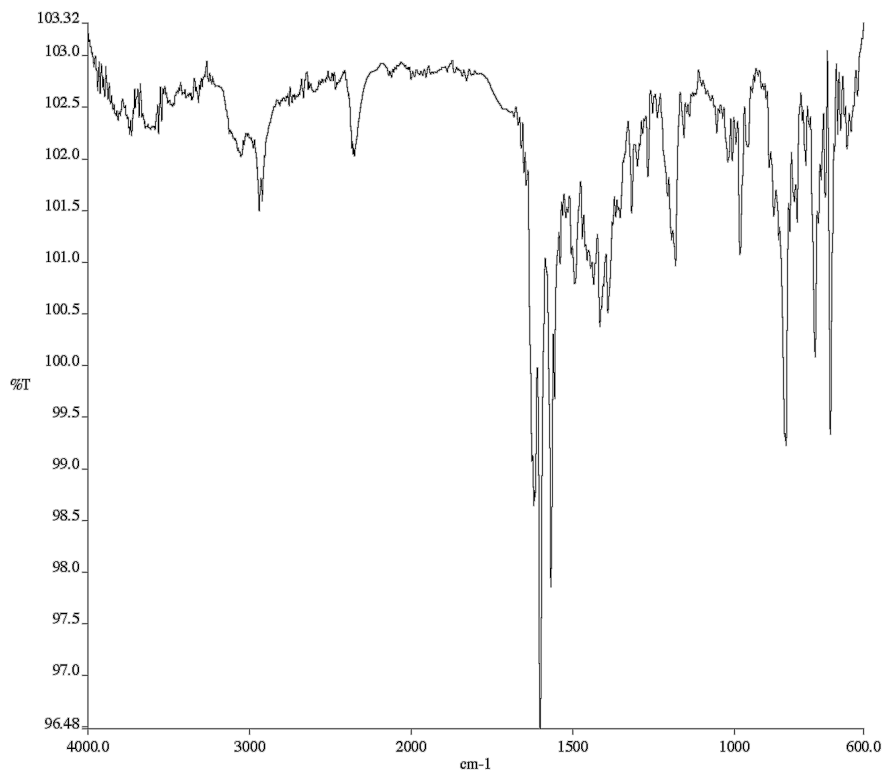

Infrared spectrum (Thin Film, NaCl) of **6q**.

— 158.78  
— 137.35  
— 136.79  
— 130.13  
— 128.89  
— 127.05  
— 126.16  
— 126.14  
— 125.74  
— 113.32  
— 39.14  
— 22.56

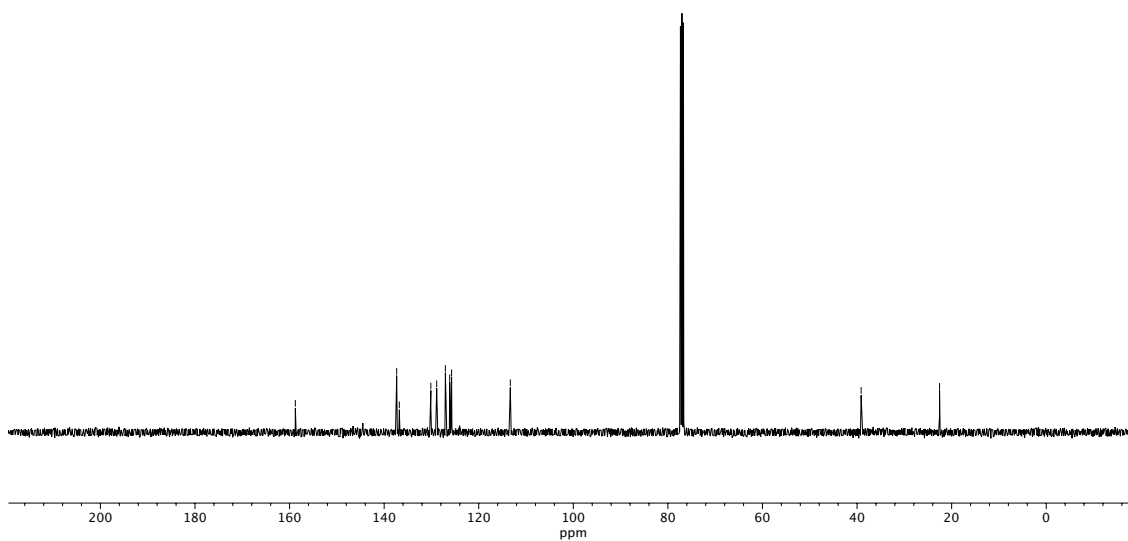

$^{13}\text{C}$  NMR (100 MHz,  $\text{CDCl}_3$ ) of **6q**.

<sup>1</sup>H NMR (400 MHz, CDCl<sub>3</sub>) of compound **6r**.

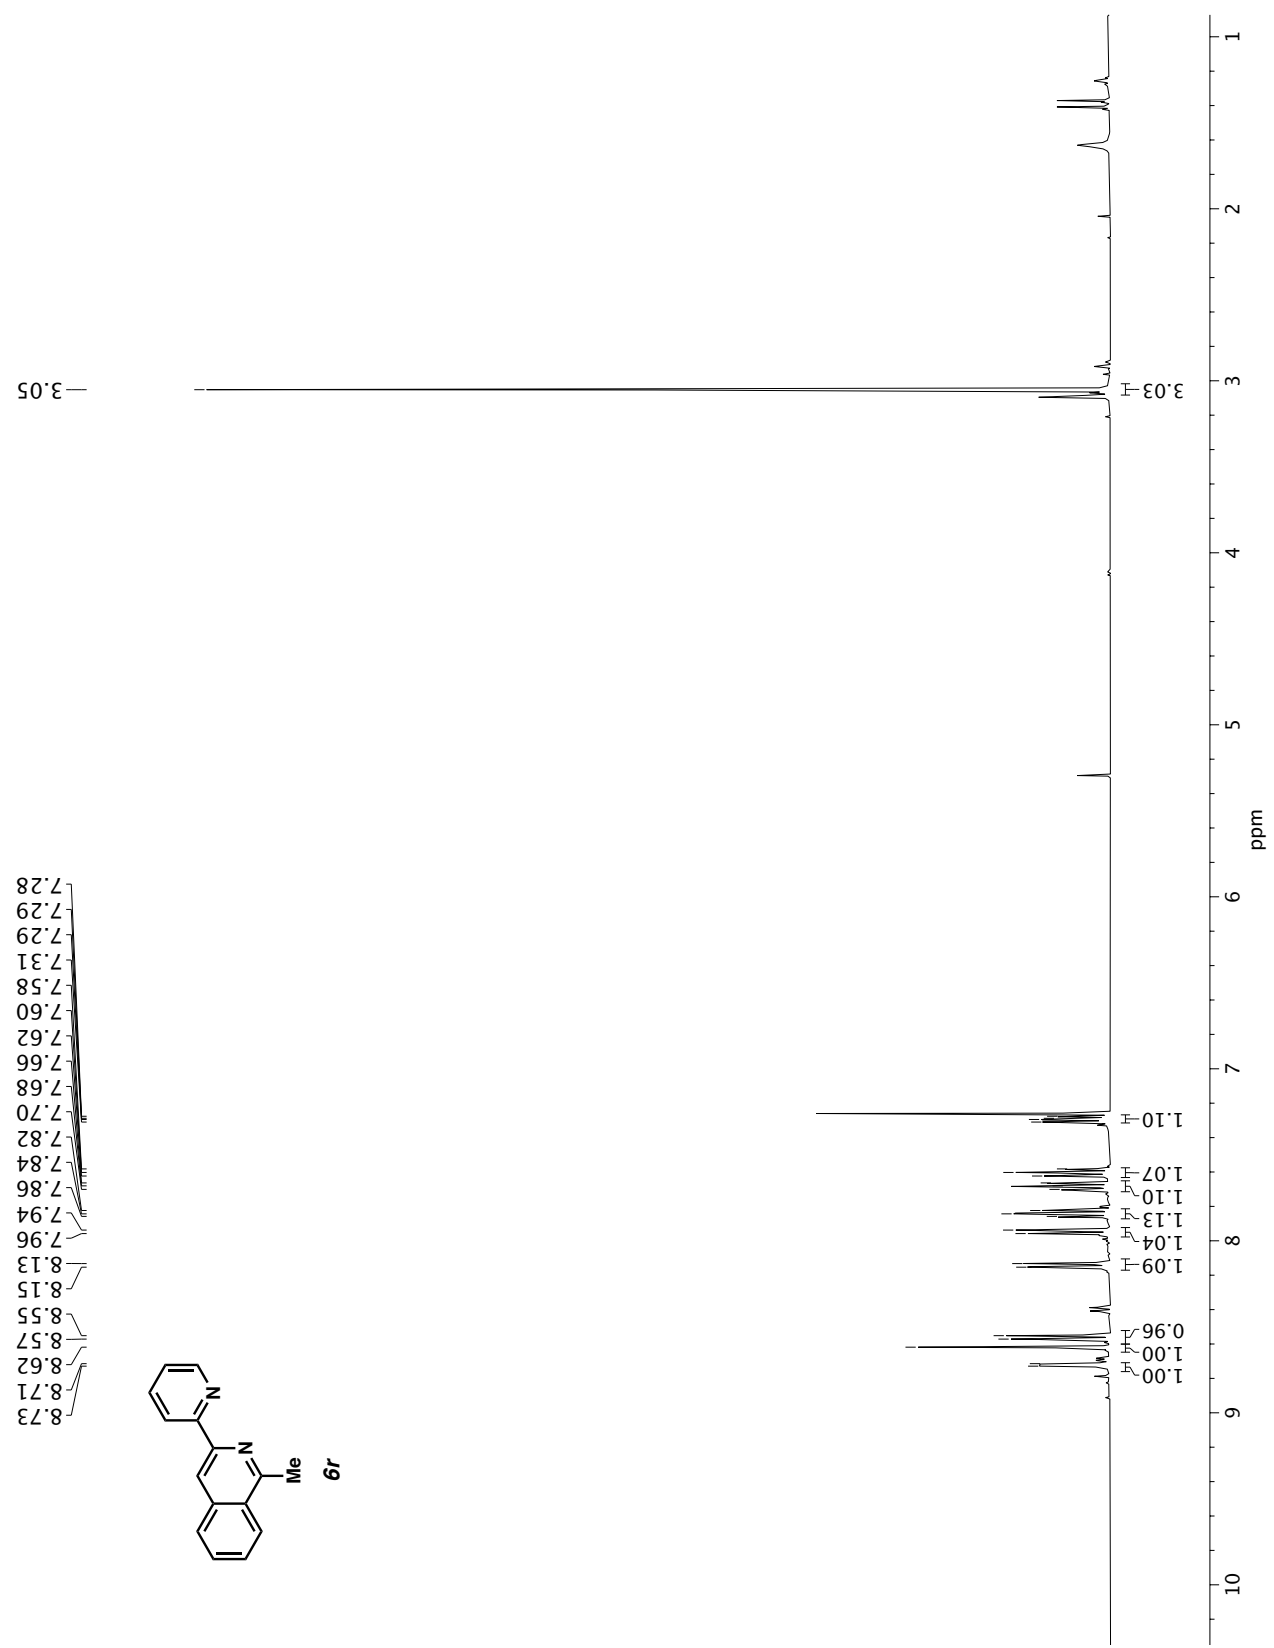



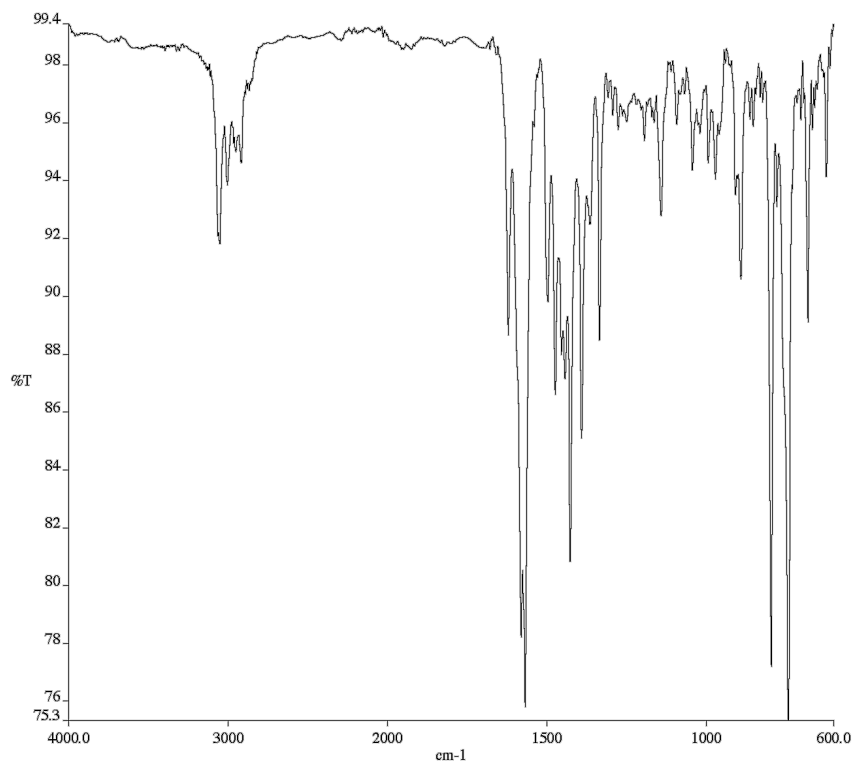

Infrared spectrum (Thin Film, NaCl) of **6r**.

1588.45  
1566.88  
1494.44  
1488.67  
1377.07  
1366.85  
1300.20  
1288.55  
1277.71  
1277.49  
1255.75  
1233.26  
1211.40  
1166.51

22.86

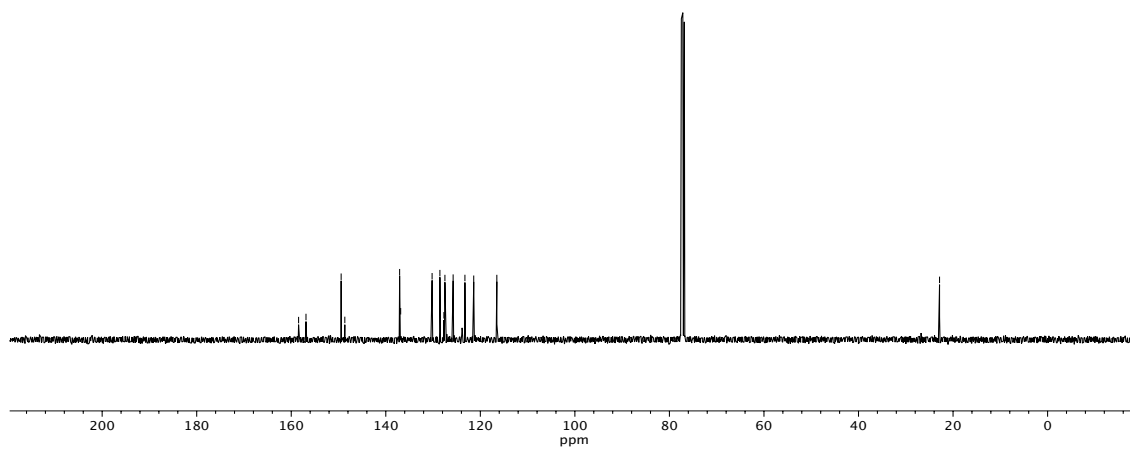

$^{13}\text{C}$  NMR (100 MHz,  $\text{CDCl}_3$ ) of **6r**.

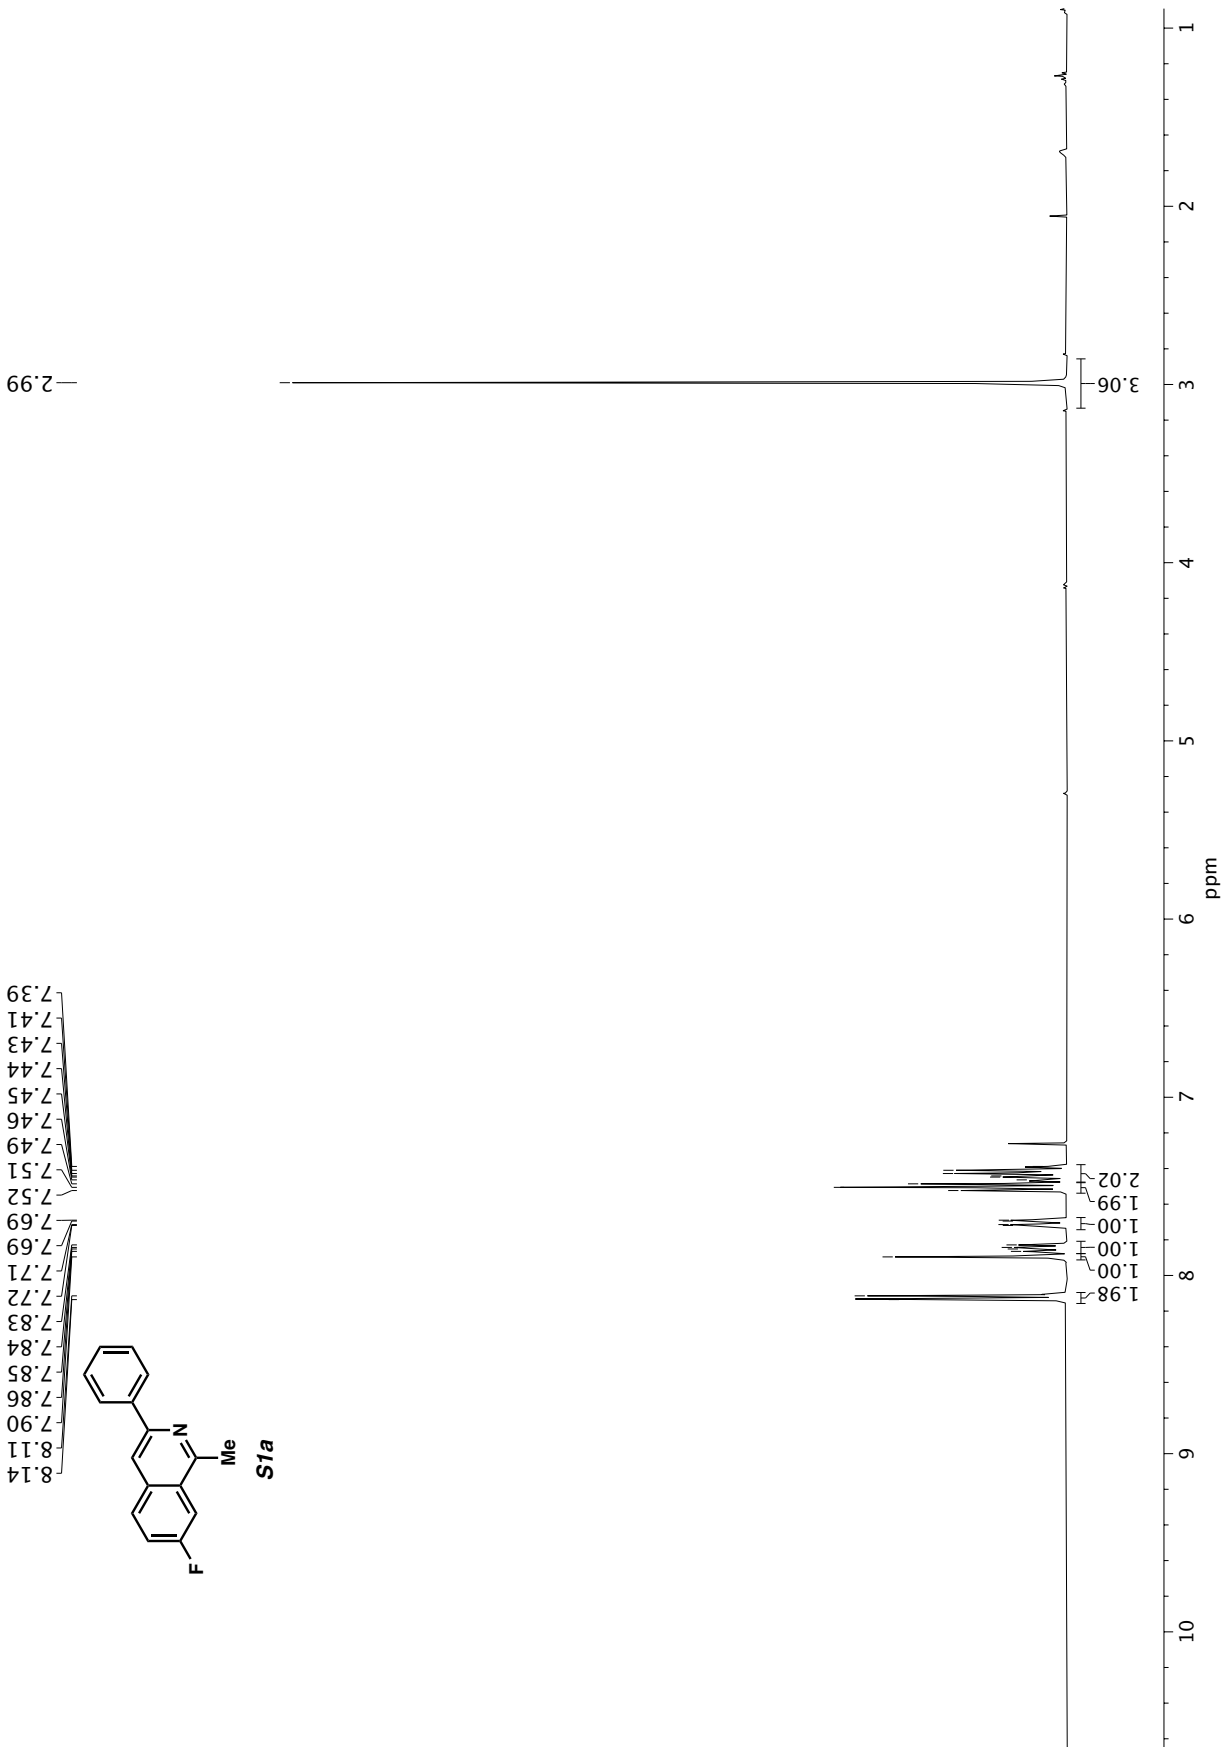

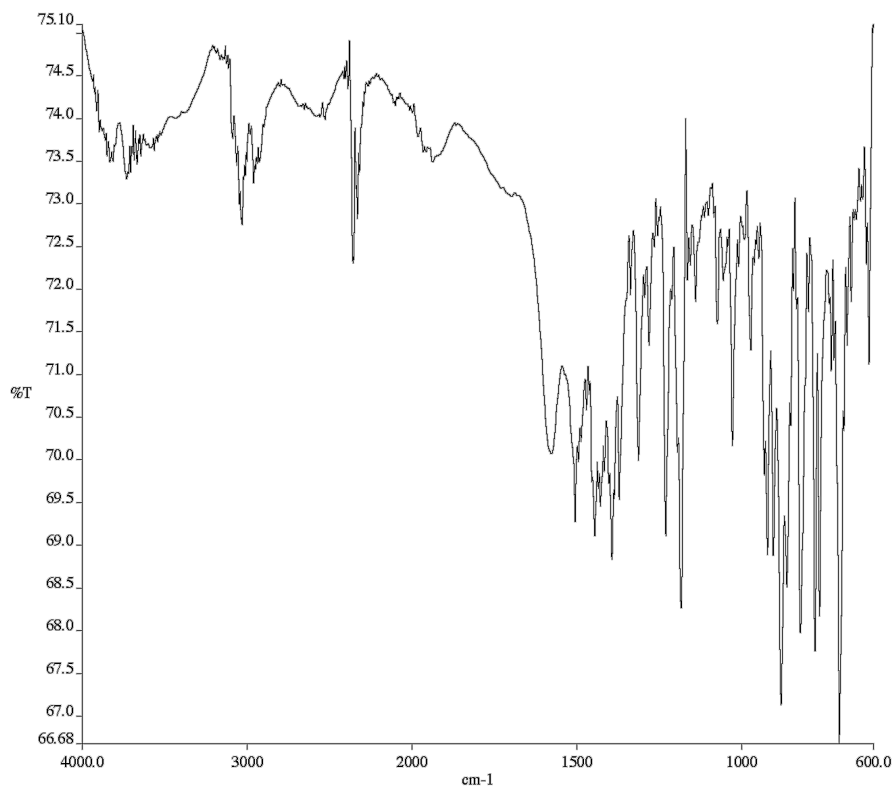

Infrared spectrum (Thin Film, NaCl) of **S1a**.

161.85  
 159.38  
 157.93  
 157.87  
 149.71  
 149.68  
 139.57  
 133.79  
 130.20  
 130.11  
 128.79  
 128.42  
 126.90  
 120.62  
 120.37  
 114.81  
 114.79  
 109.37  
 109.16

-22.72

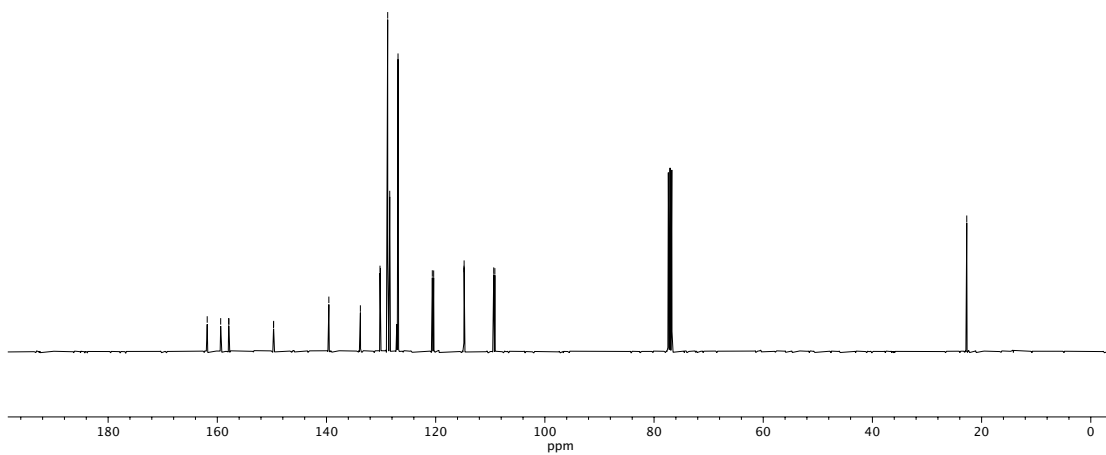

$^{13}\text{C}$  NMR (100 MHz,  $\text{CDCl}_3$ ) of **S1a**.

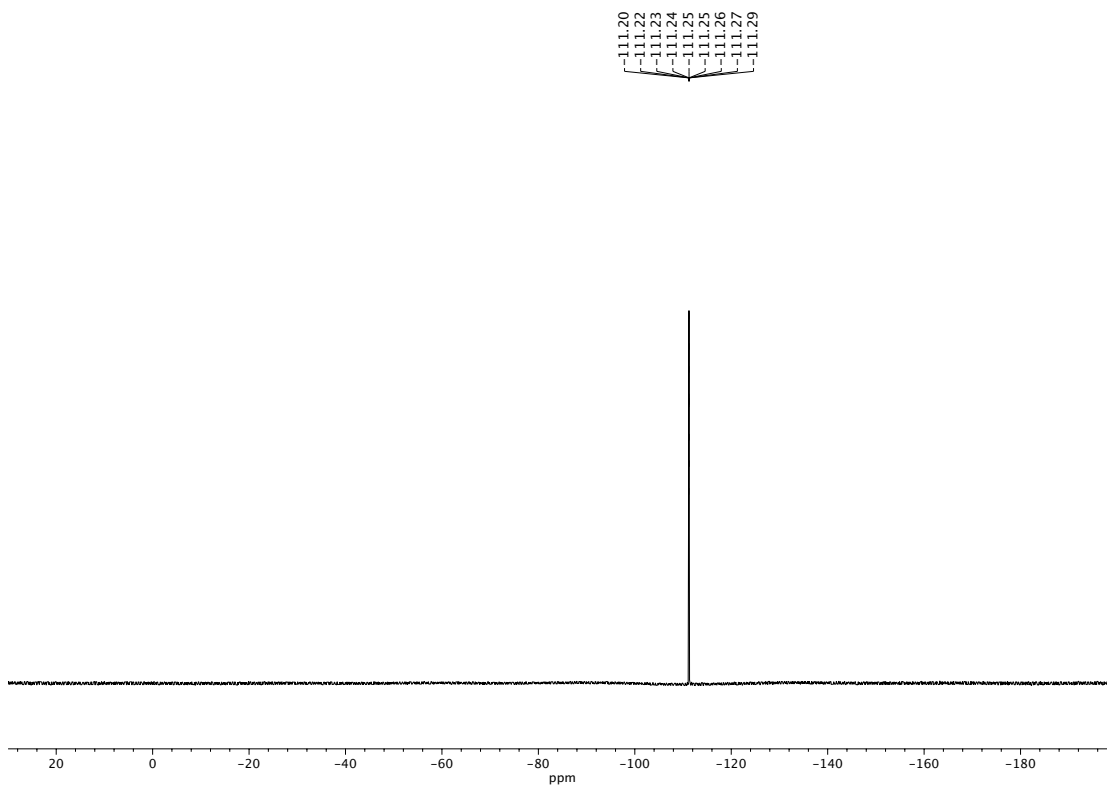

$^{19}\text{F}$  NMR (282 MHz,  $\text{CDCl}_3$ ) of **S1a**.

8.09  
8.08  
8.06  
8.05  
8.05  
7.85  
7.84  
7.83  
7.82  
7.71  
7.71  
7.69  
7.68  
7.46  
7.45  
7.44  
7.43  
7.42  
7.41  
7.08  
7.04  
7.01  
7.01

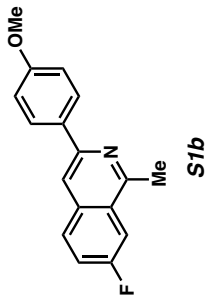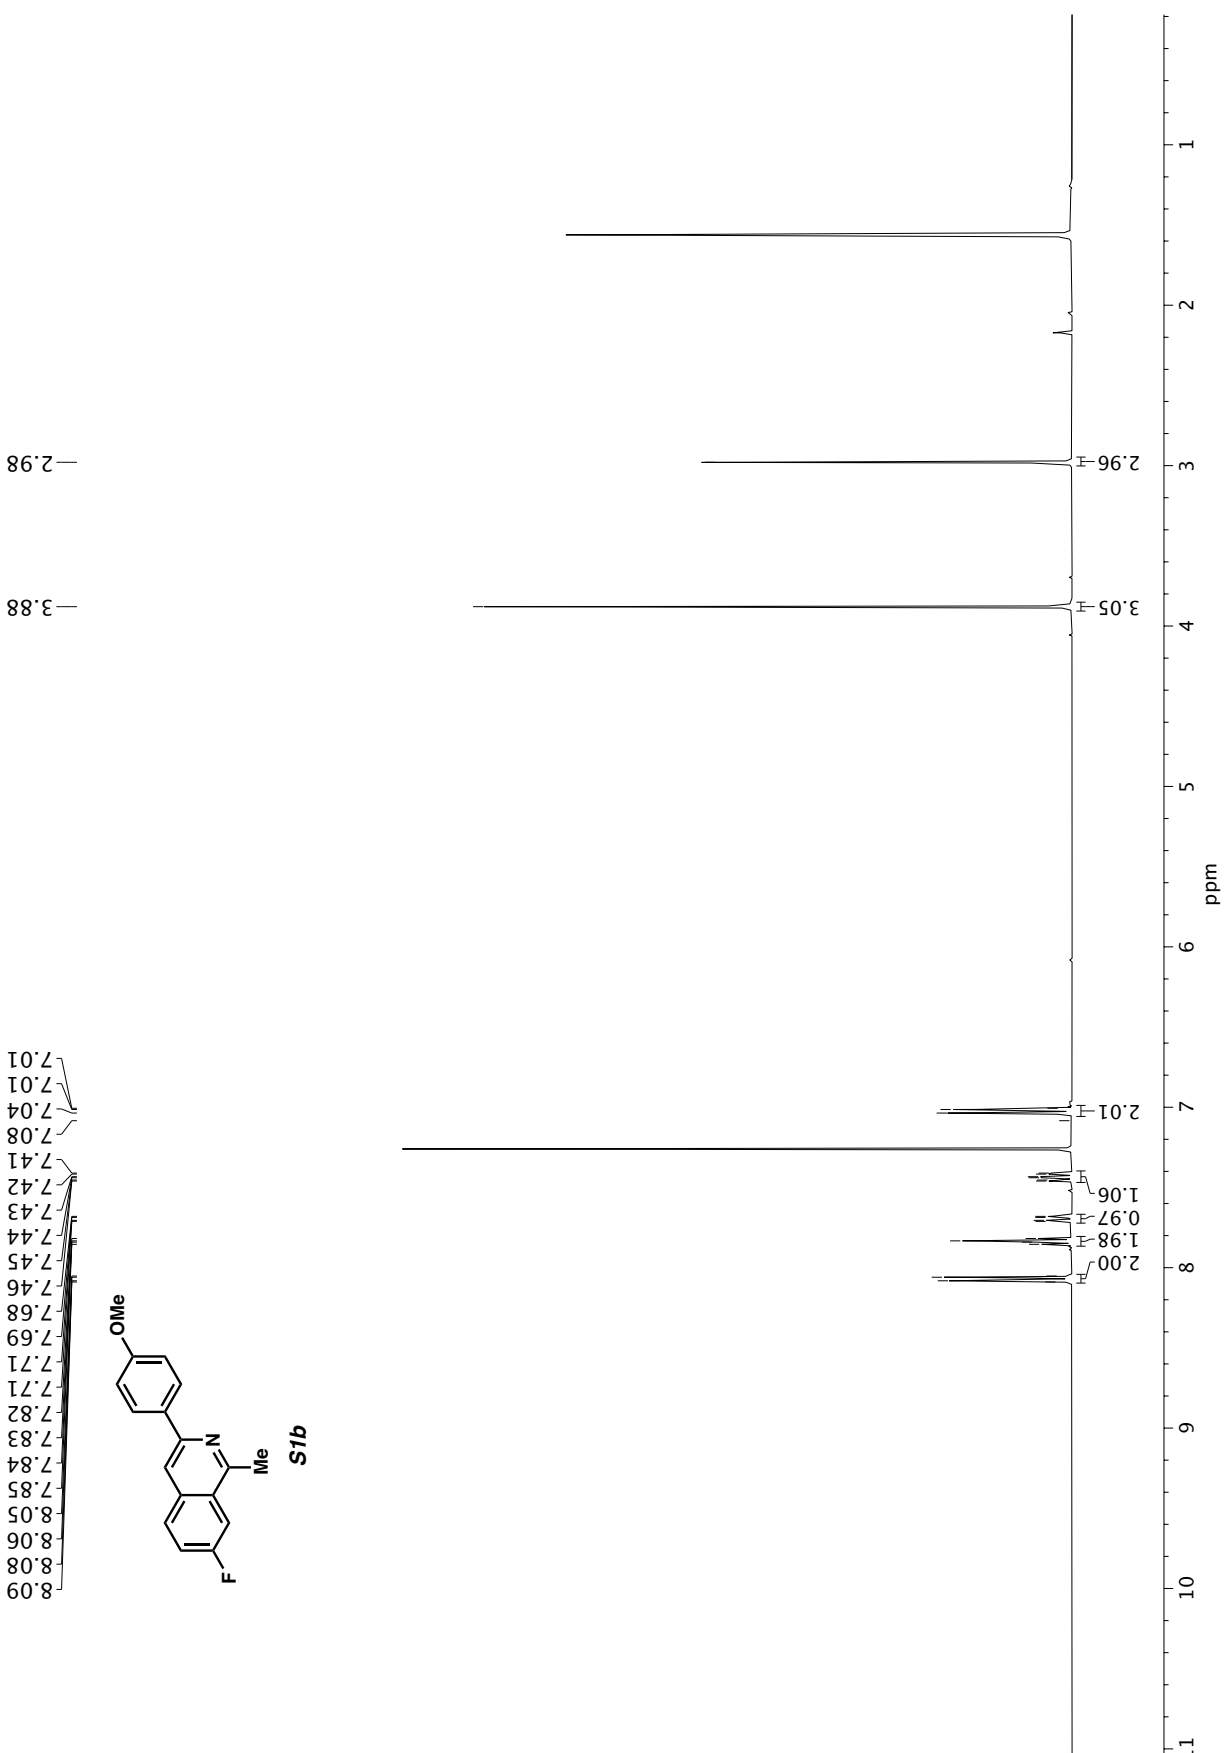

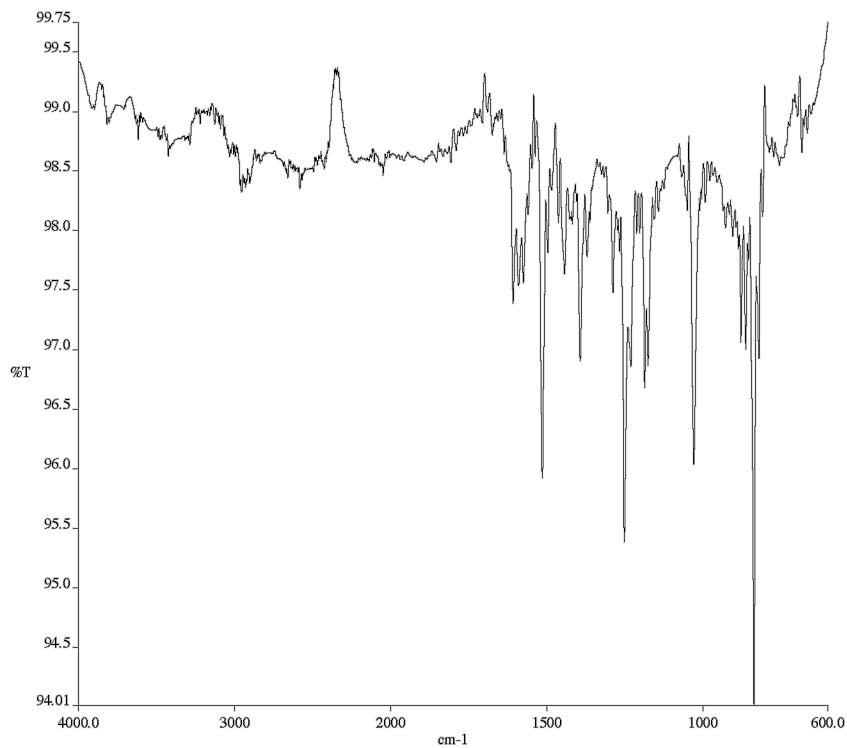

Infrared spectrum (Thin Film, NaCl) of compound **S1b**.

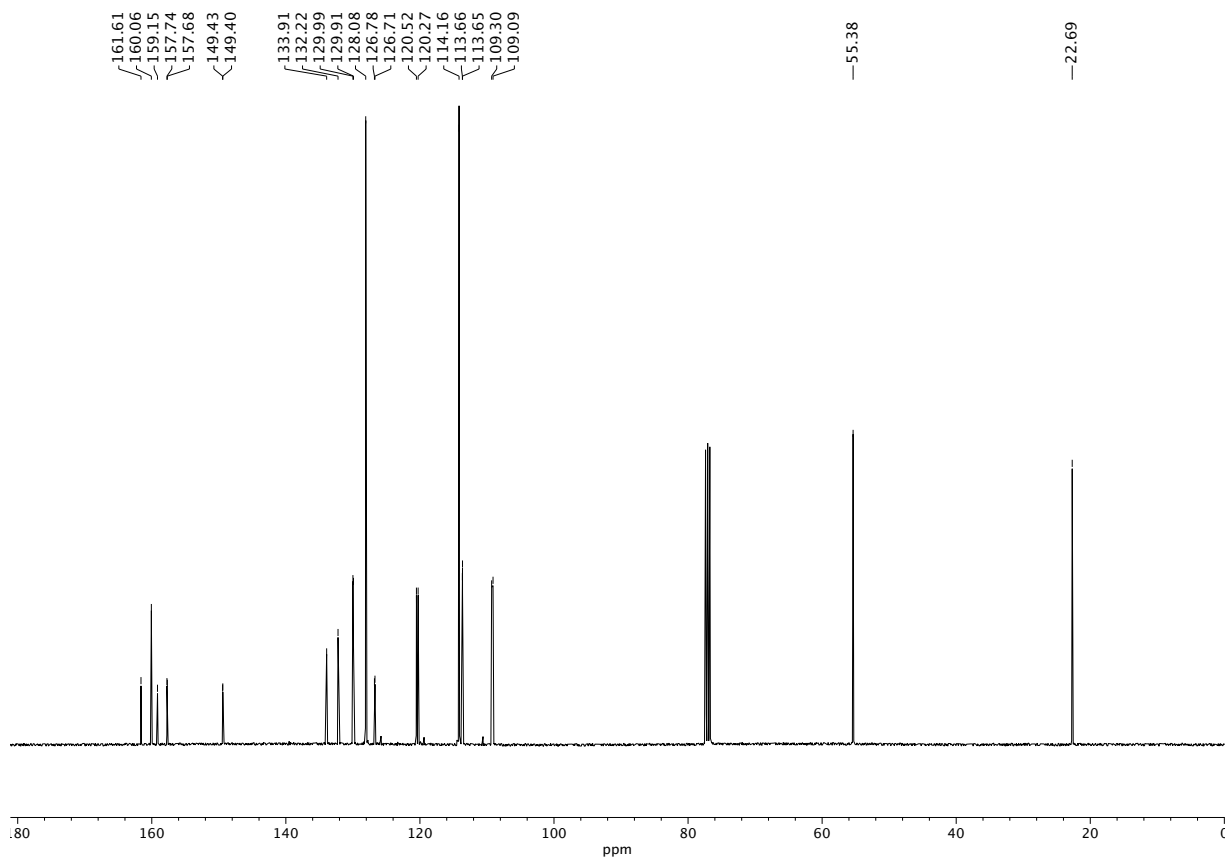

<sup>13</sup>C NMR (100 MHz, CDCl<sub>3</sub>) of **S1b**.

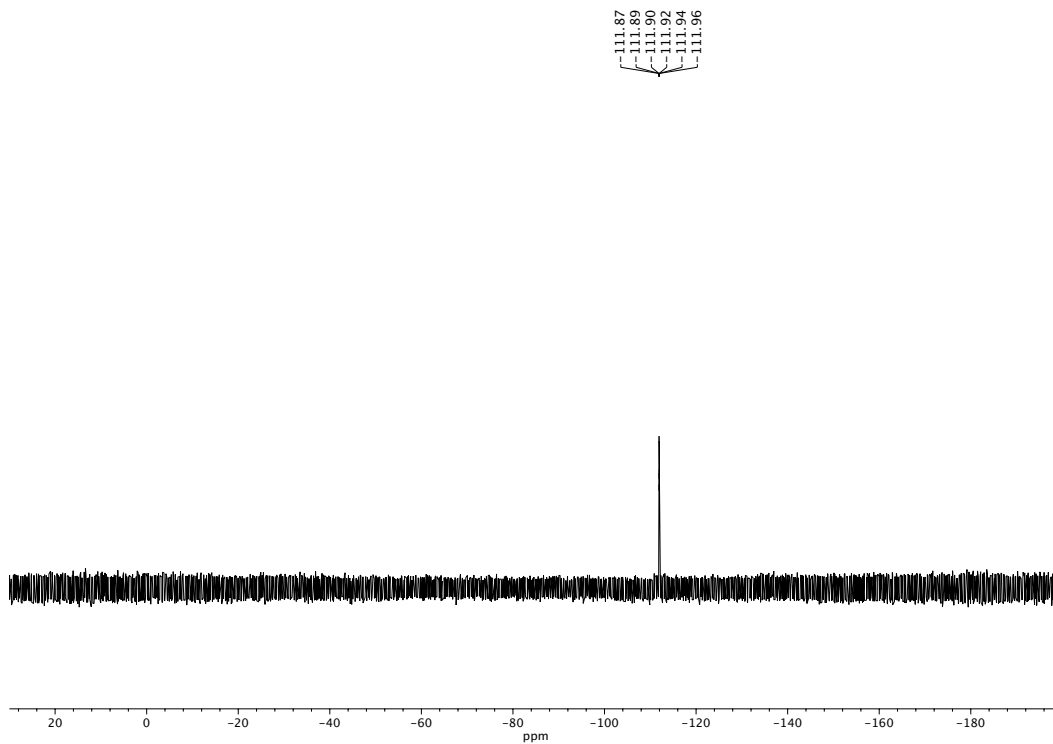

$^{19}\text{F}$  NMR (282 MHz,  $\text{CDCl}_3$ ) of **S1b**.

8.24  
8.22  
7.94  
7.92  
7.90  
7.87  
7.86  
7.84  
7.75  
7.73  
7.71  
7.50  
7.47  
7.45

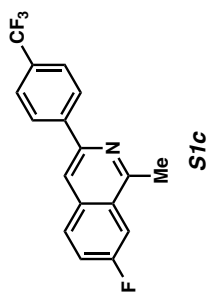

2.99

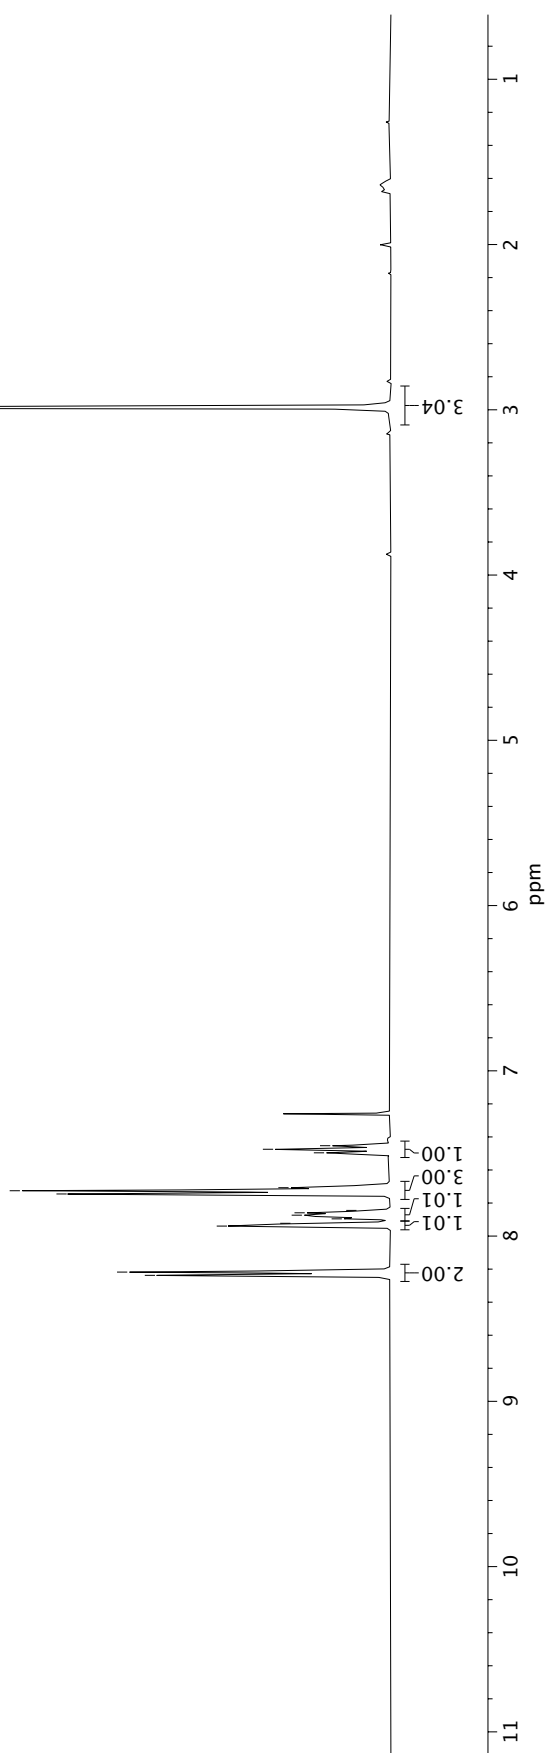

<sup>1</sup>H NMR (400 MHz, CDCl<sub>3</sub>) of compound **S1c**.



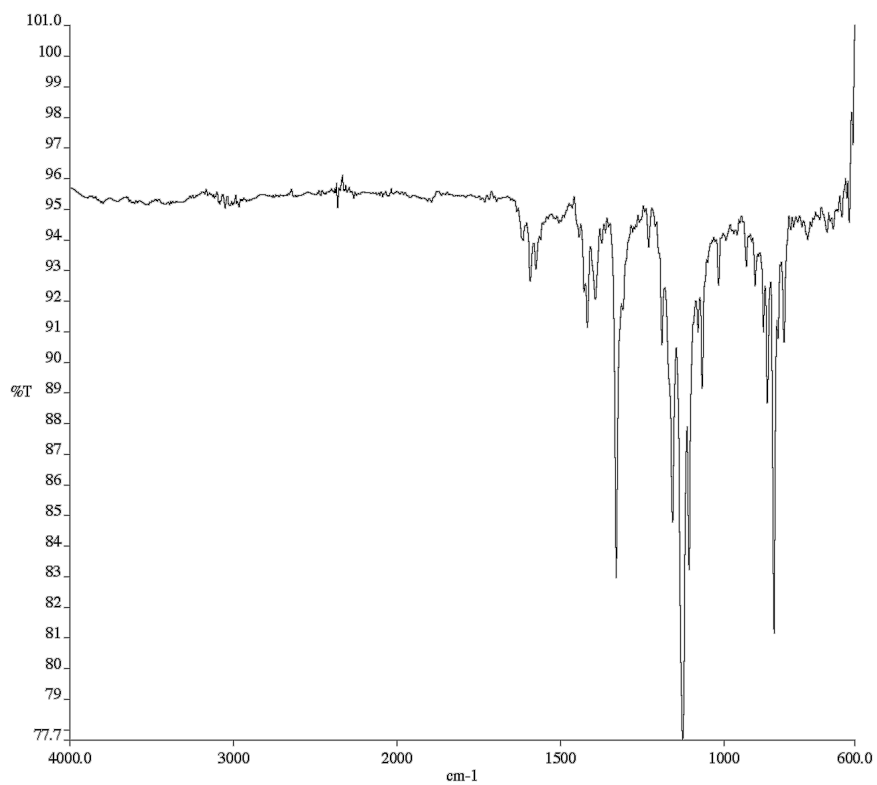

Infrared spectrum (Thin Film, NaCl) of compound **S1c**.

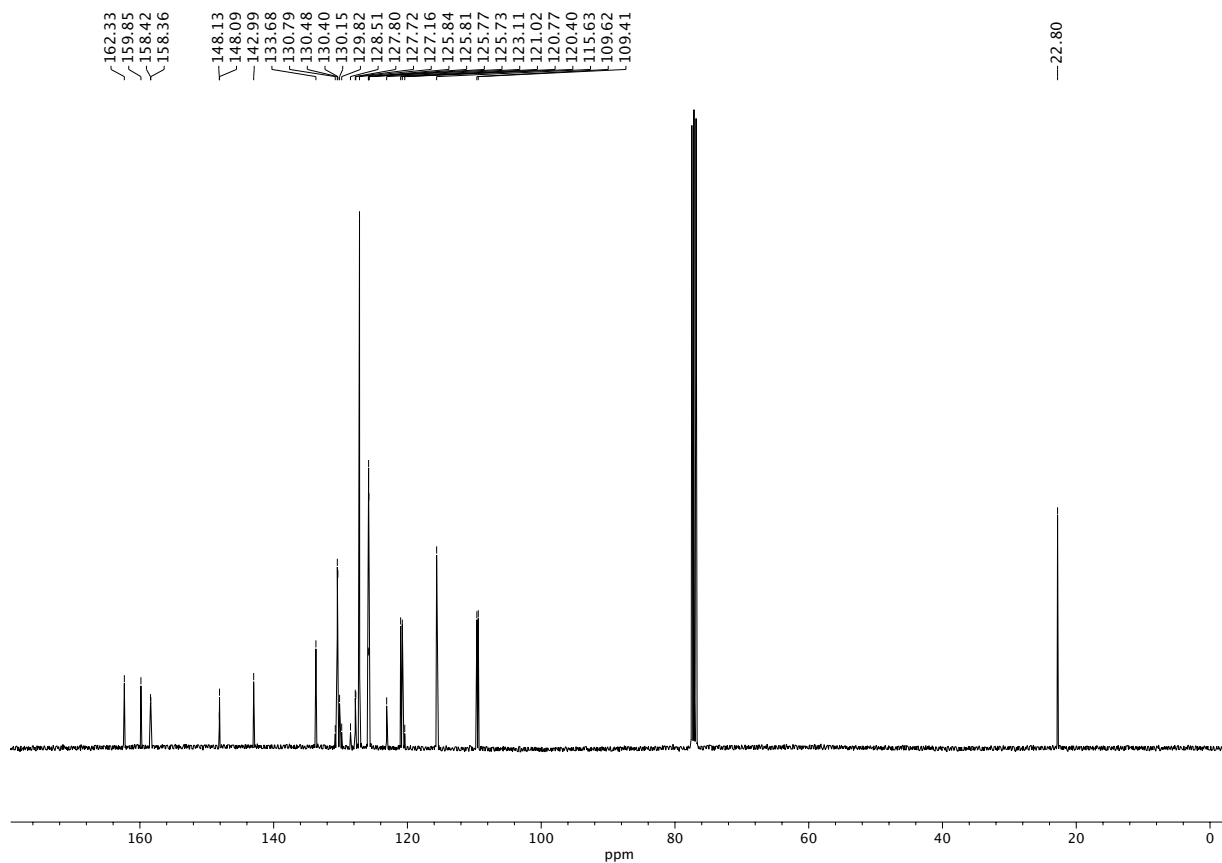

$^{13}\text{C}$  NMR (100 MHz,  $\text{CDCl}_3$ ) of compound **S1c**.

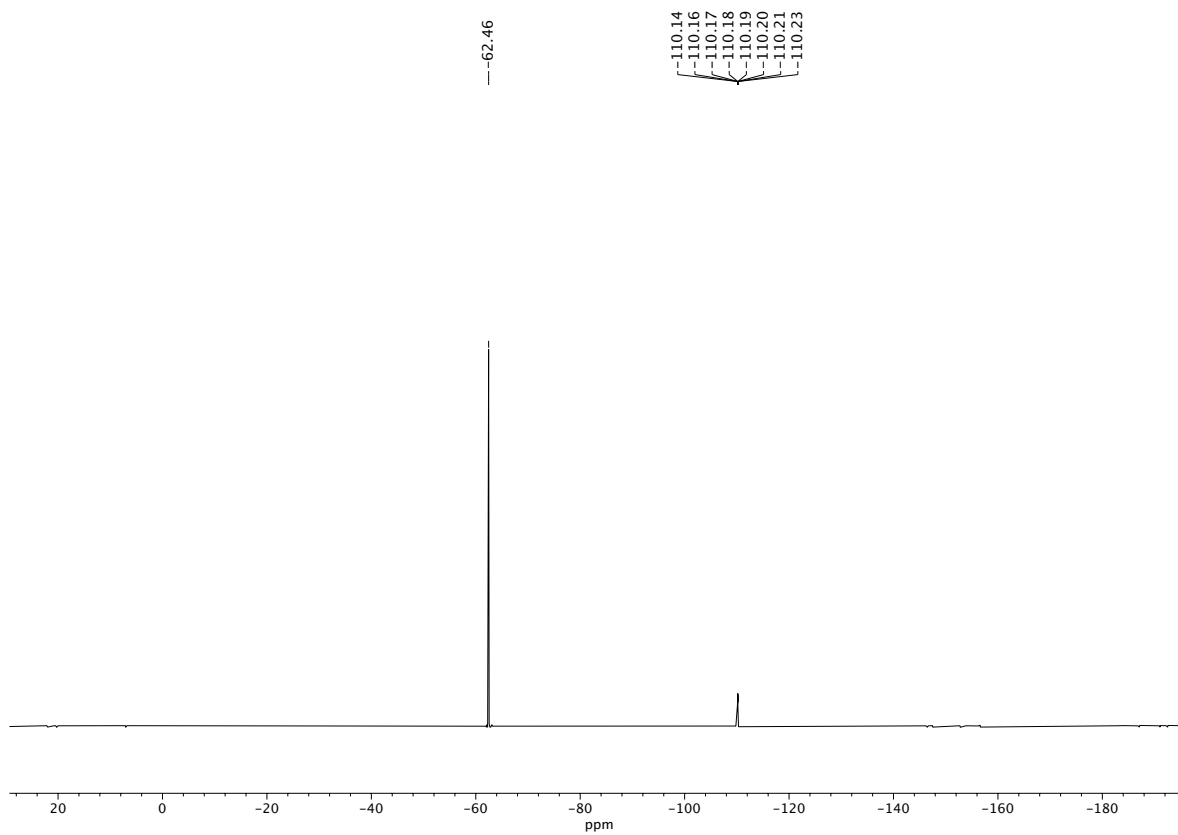

$^{19}\text{F}$  NMR (282 MHz,  $\text{CDCl}_3$ ) of **S1c**.

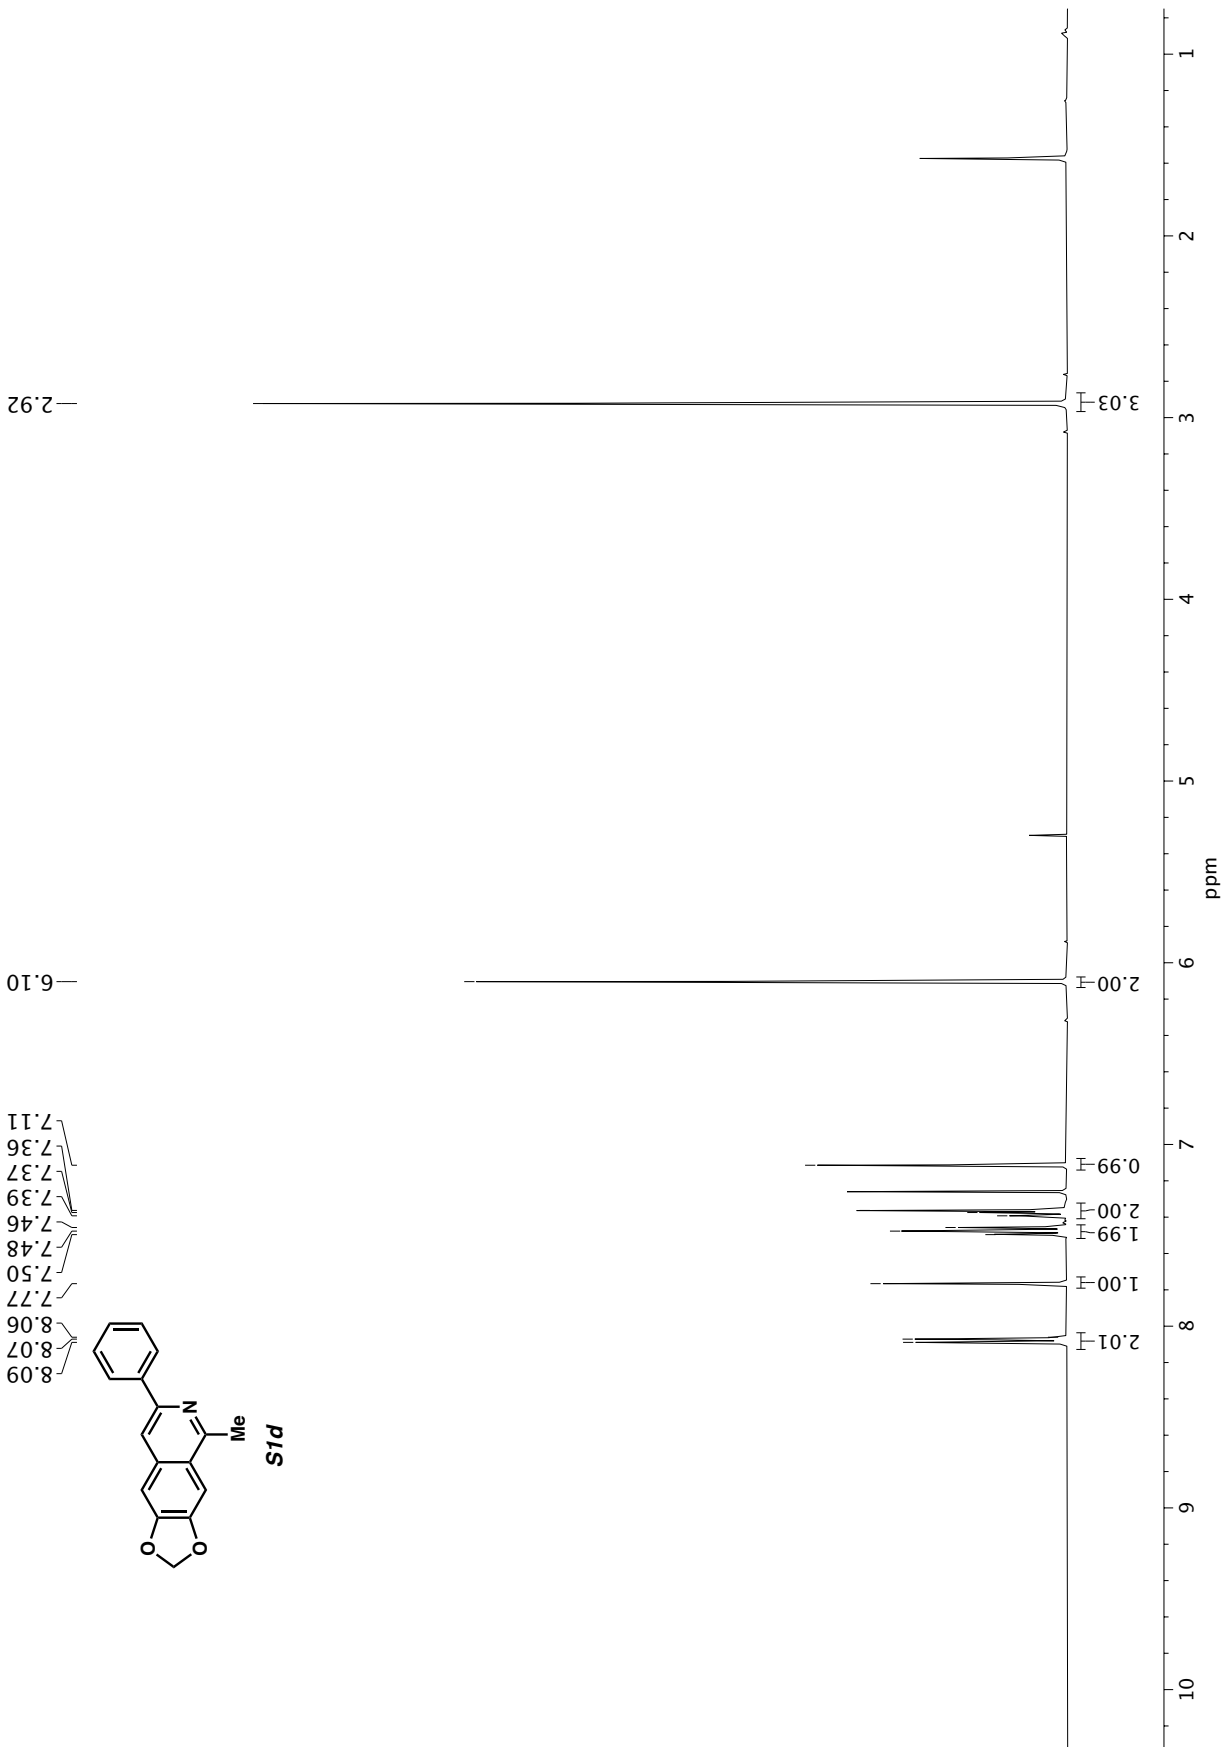

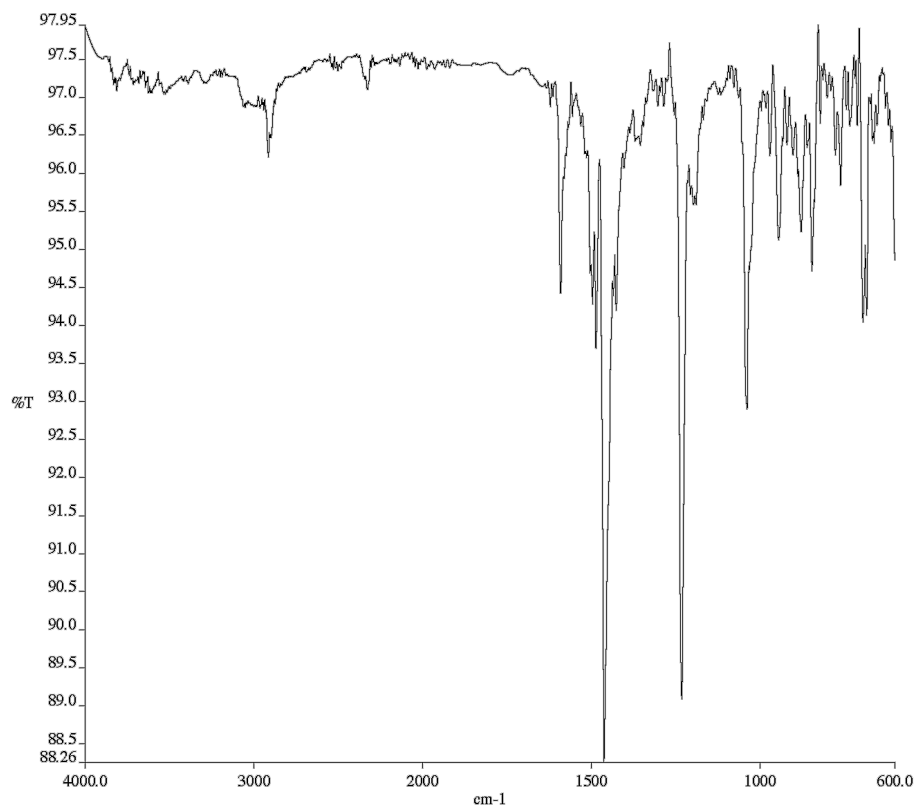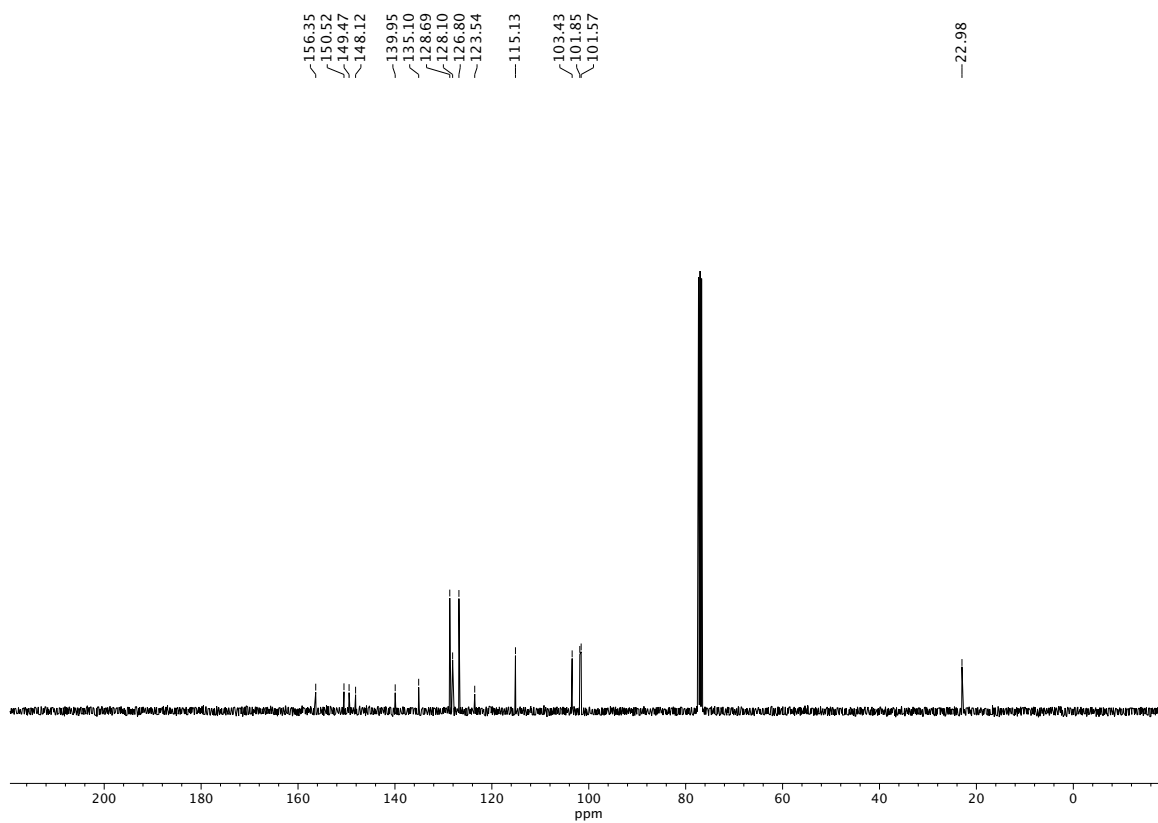

7.72  
7.71  
7.69  
7.62  
7.61  
7.59  
7.59  
7.34  
7.09  
6.98  
6.95  
6.09

4.02  
3.94

2.91

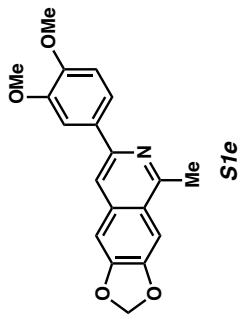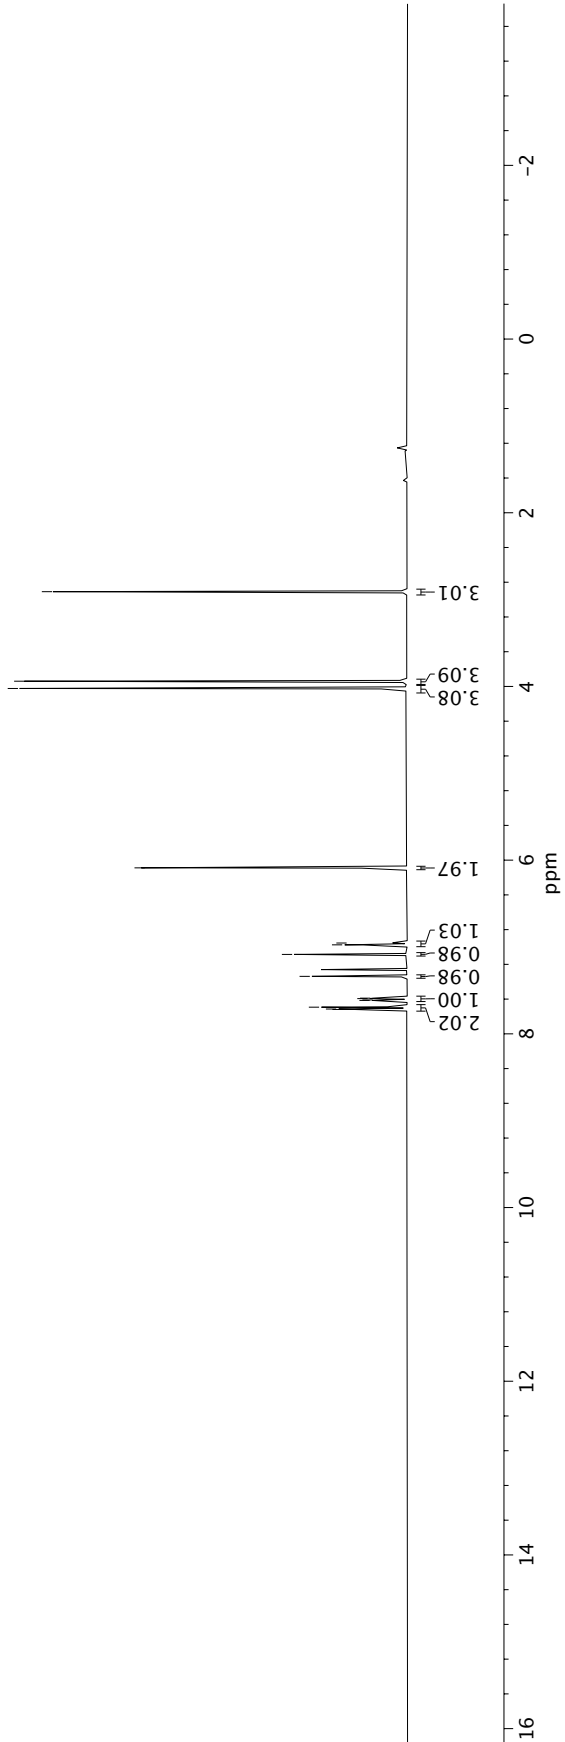

<sup>1</sup>H NMR (400 MHz, CDCl<sub>3</sub>) of compound **Ste**.

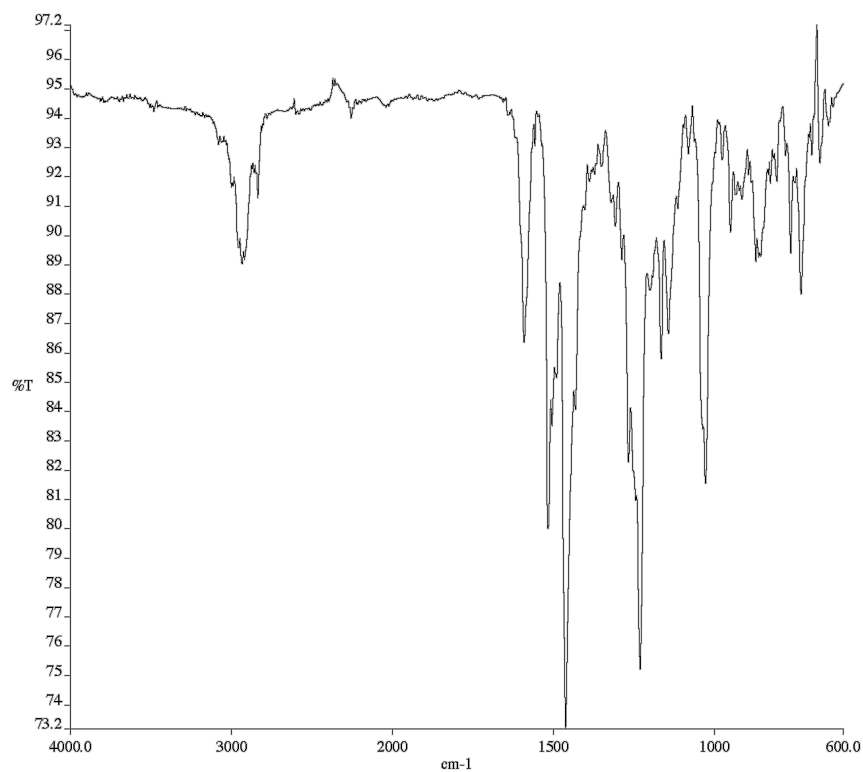

Infrared spectrum (Thin Film, NaCl) of compound S1e.

156.19  
150.51  
149.30  
149.18  
149.15  
147.92  
135.18  
132.99  
123.22  
119.12  
114.31  
111.22  
109.99  
103.26  
101.83  
101.53  
56.00  
55.97  
22.99

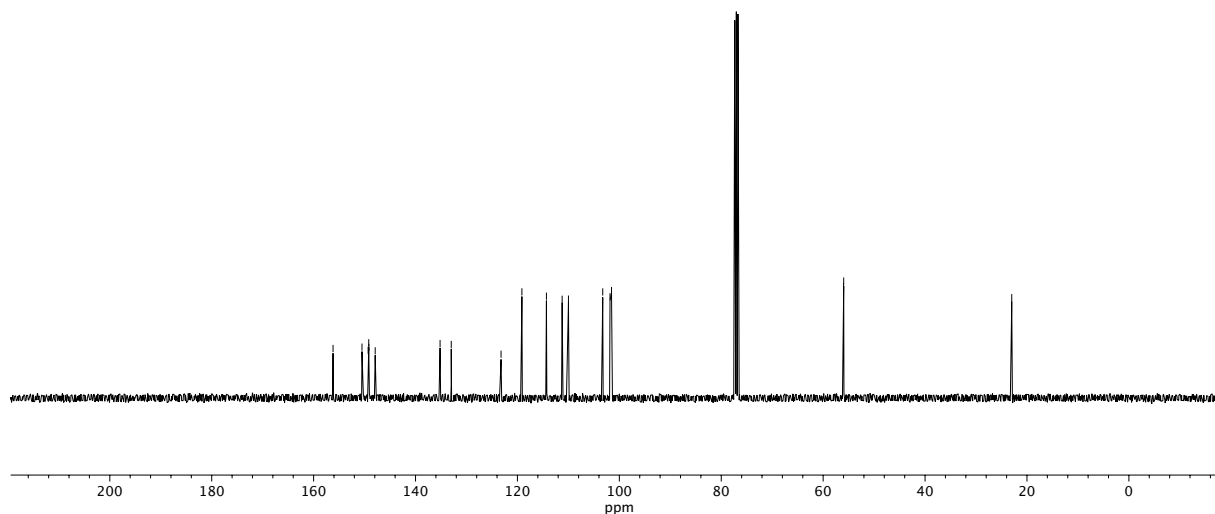

<sup>13</sup>C NMR (100 MHz, CDCl<sub>3</sub>) of compound S1e.

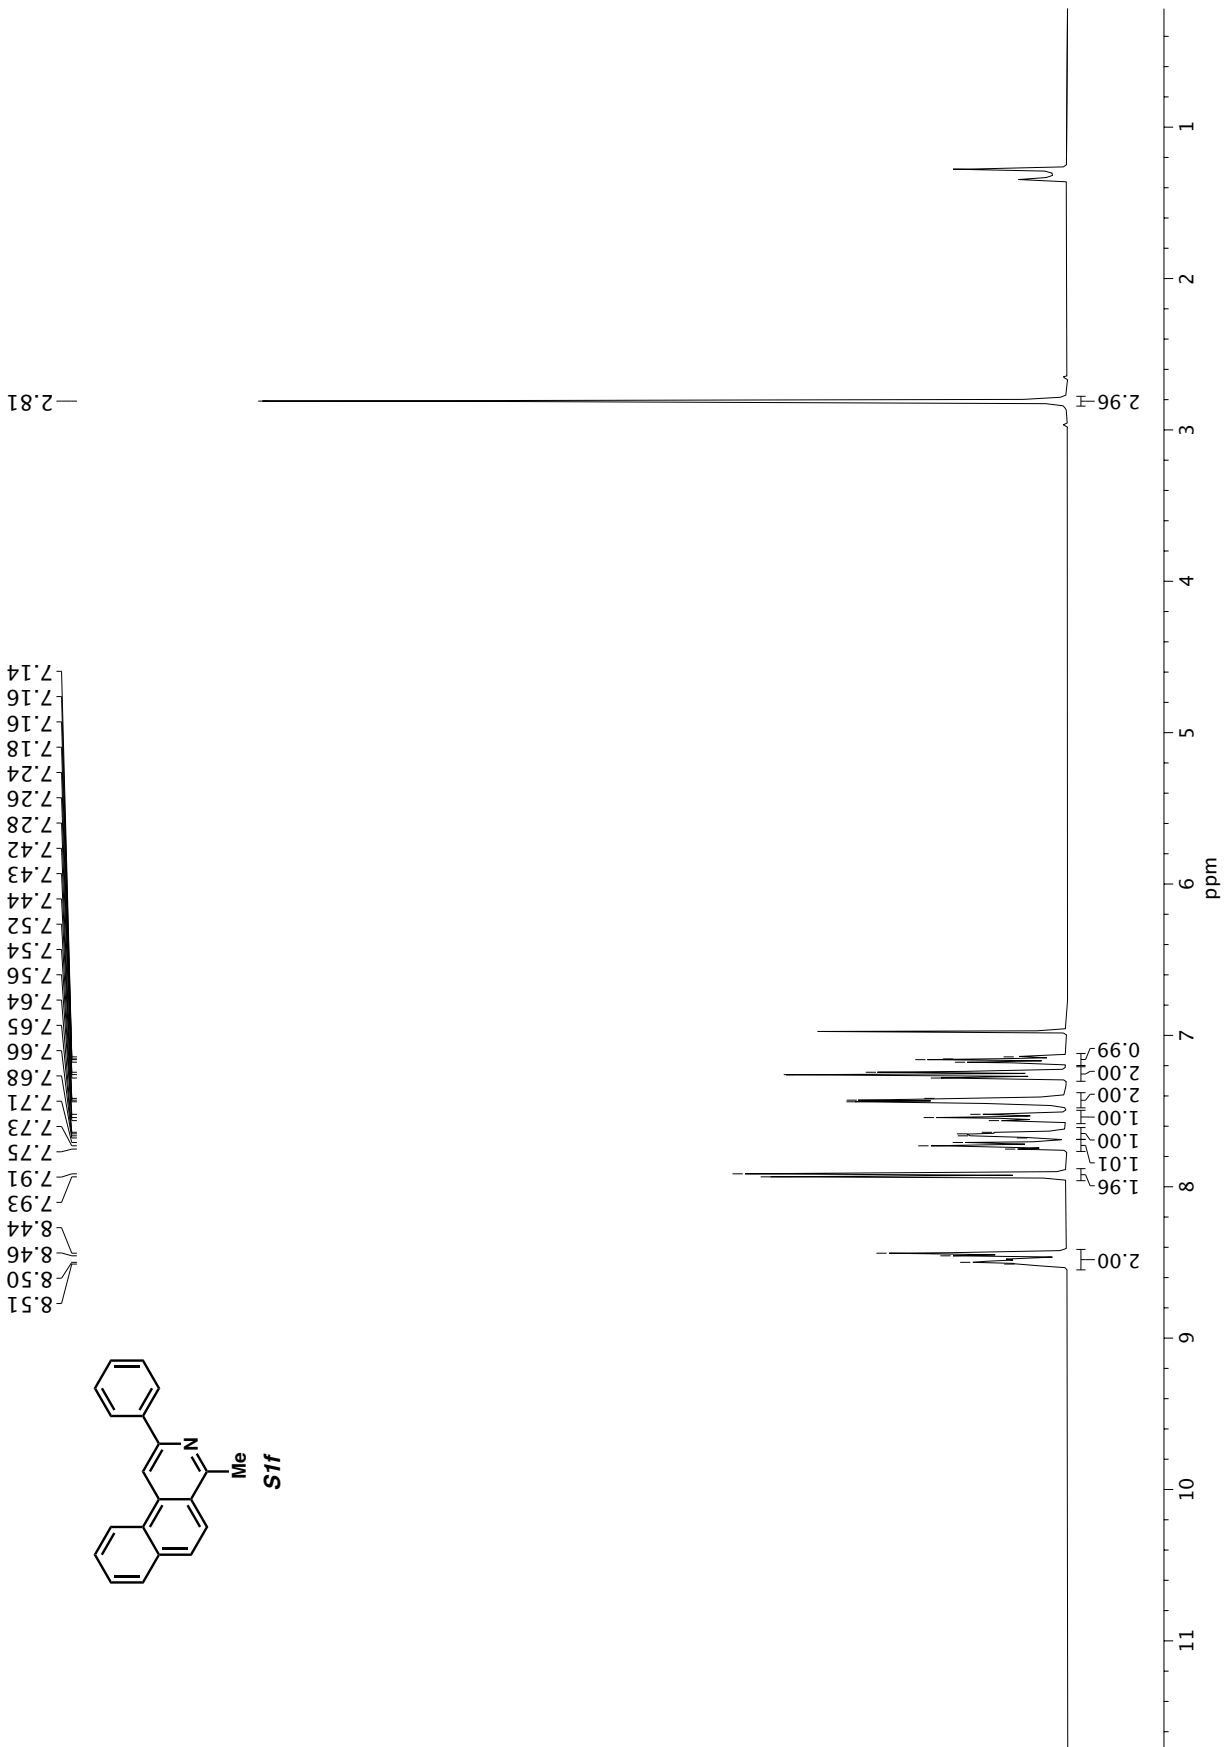

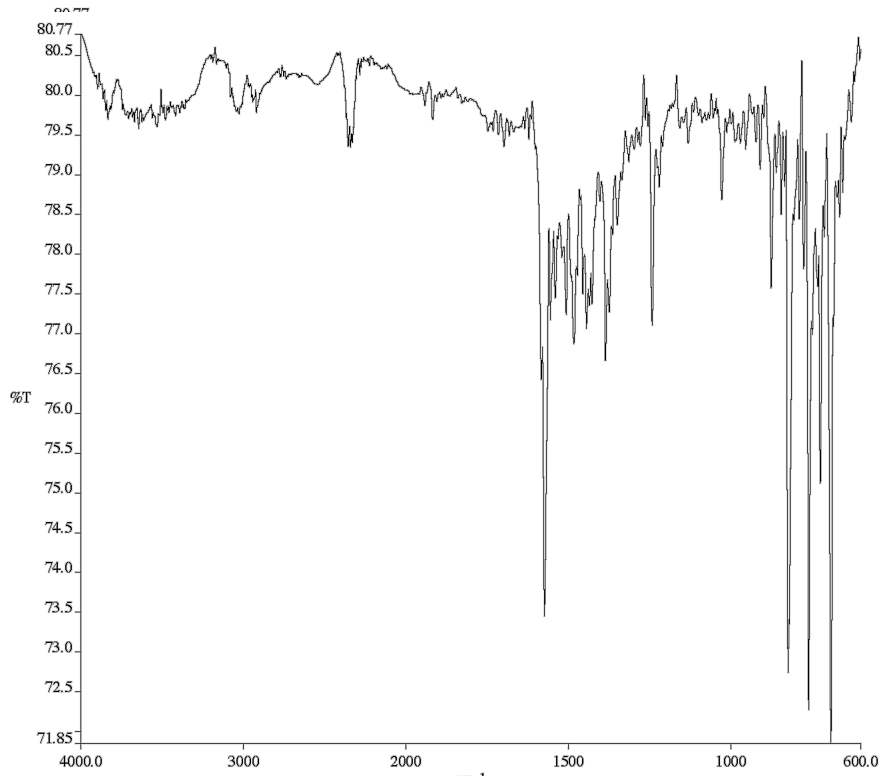

Infrared spectrum (Thin Film, NaCl) of compound **S1f**.

157.91  
151.99  
140.27  
135.58  
133.36  
129.26  
128.82  
128.73  
128.51  
128.41  
127.68  
127.24  
127.08  
124.41  
123.38  
122.93  
110.98

23.12

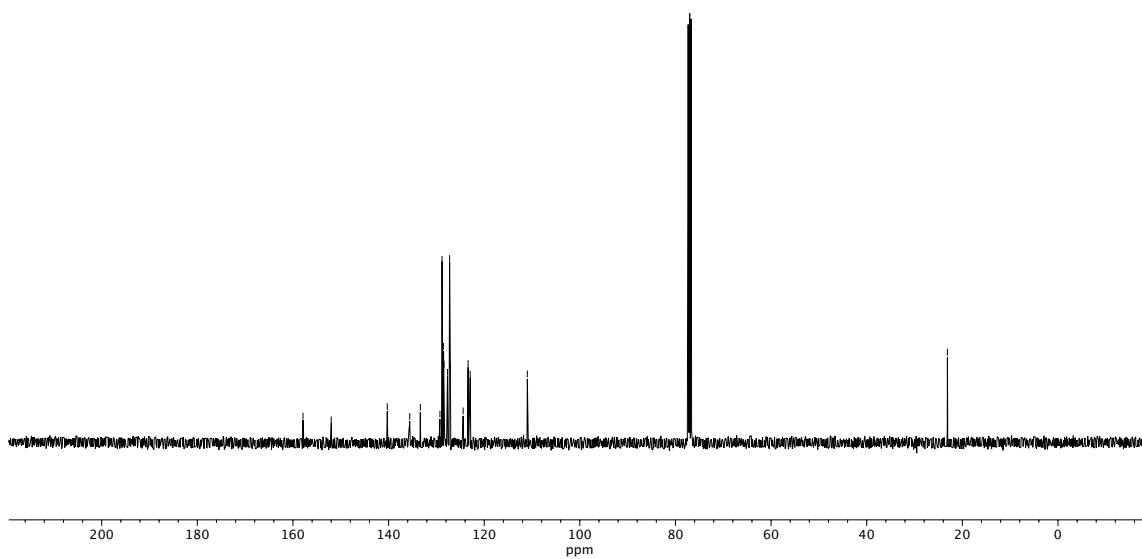

$^{13}\text{C}$  NMR (100 MHz,  $\text{CDCl}_3$ ) of compound **S1f**.



8.18  
8.17  
8.15  
8.03  
7.94  
7.92  
7.75  
7.73  
7.71  
7.63  
7.61  
7.59  
7.55  
7.53  
7.51  
7.46  
7.44  
7.42

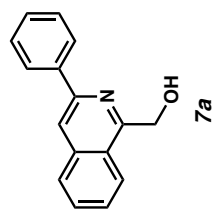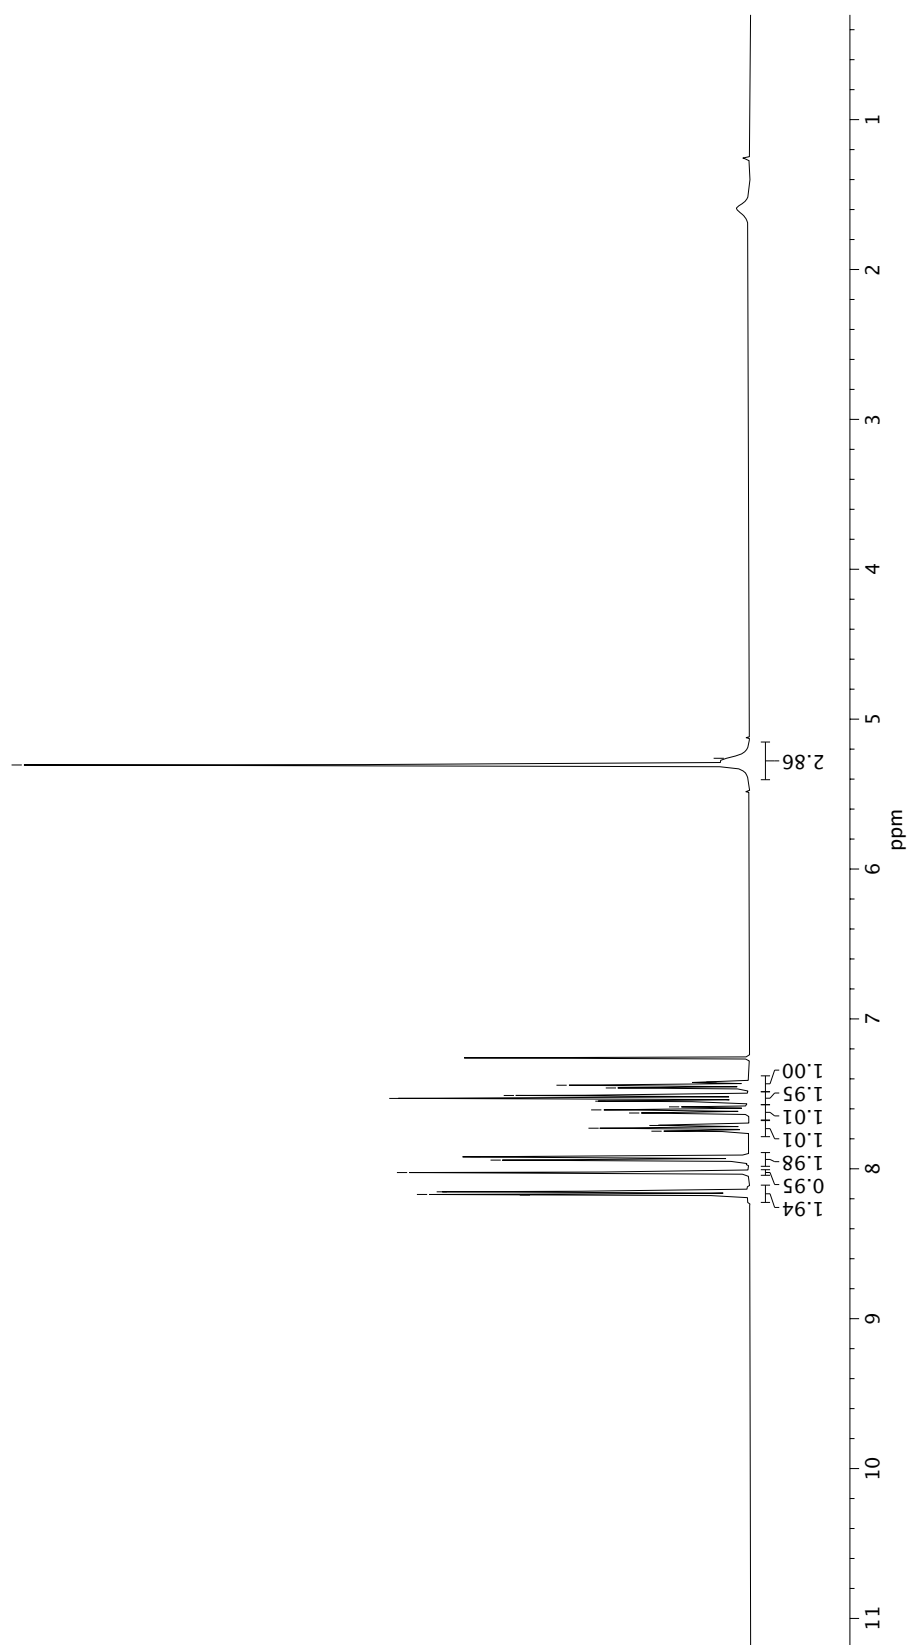

<sup>1</sup>H NMR (400 MHz, CDCl<sub>3</sub>) of compound **7a**.

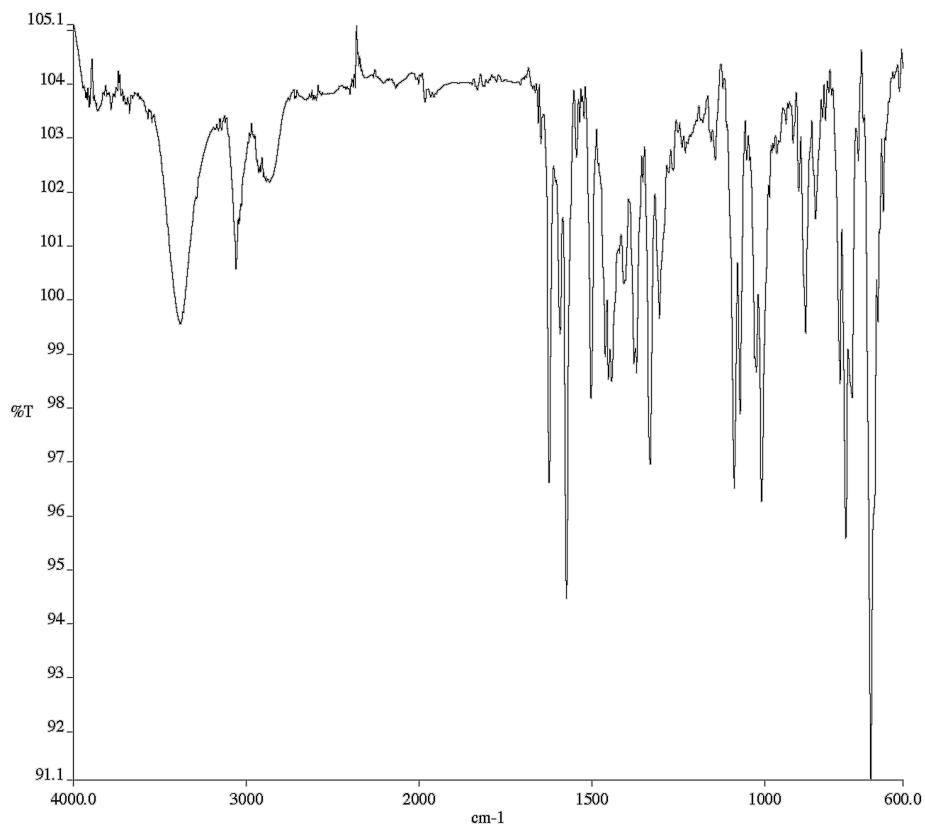

Infrared spectrum (Thin Film, NaCl) of compound **7a**.

157.37  
148.67  
138.93  
137.07  
130.87  
128.96  
128.91  
127.96  
127.53  
126.95  
124.18  
123.30  
116.29  
61.57

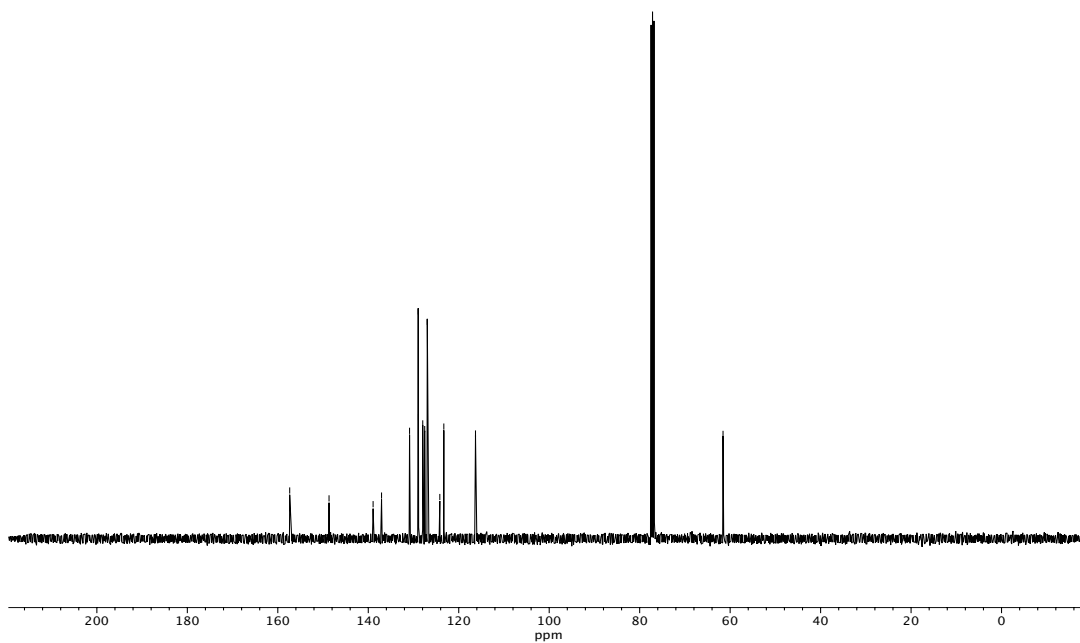

<sup>13</sup>C NMR (100 MHz, CDCl<sub>3</sub>) of compound **7a**.

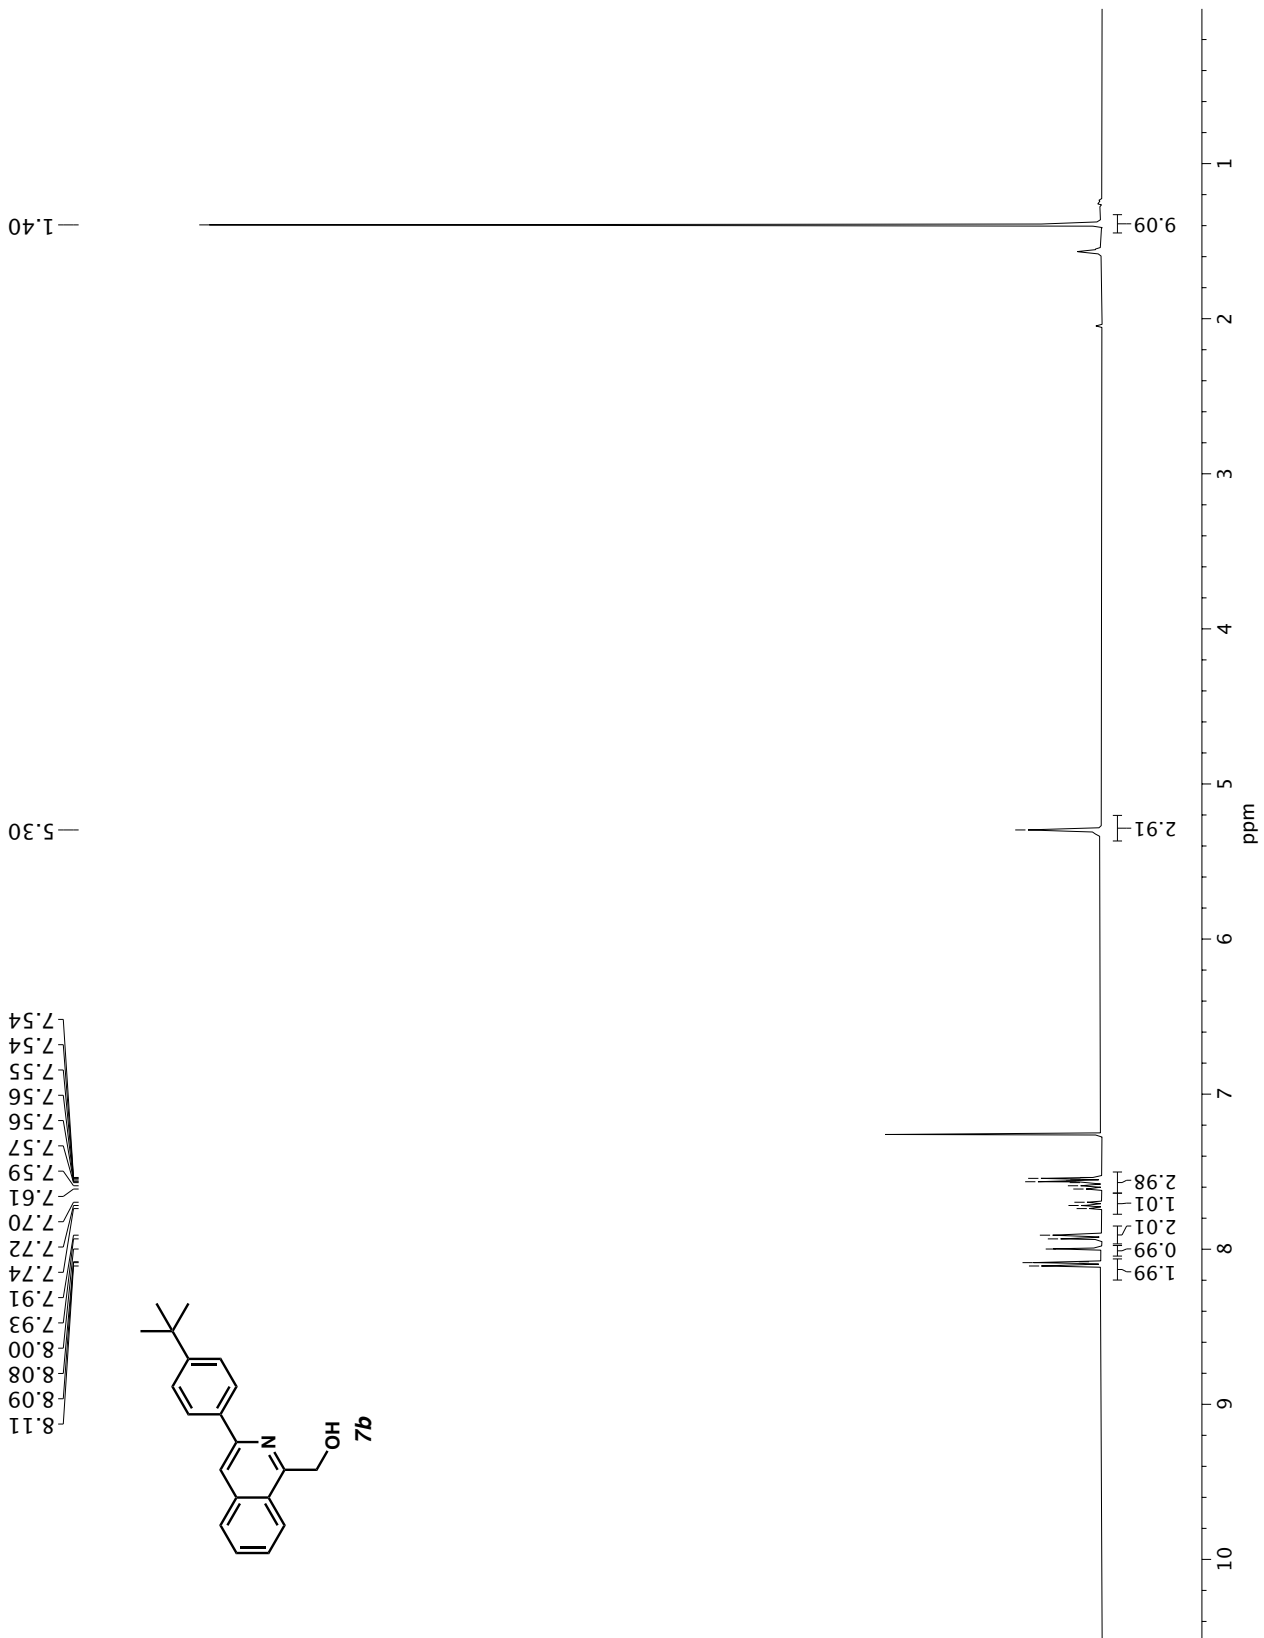

<sup>1</sup>H NMR (400 MHz, CDCl<sub>3</sub>) of compound **7b**.

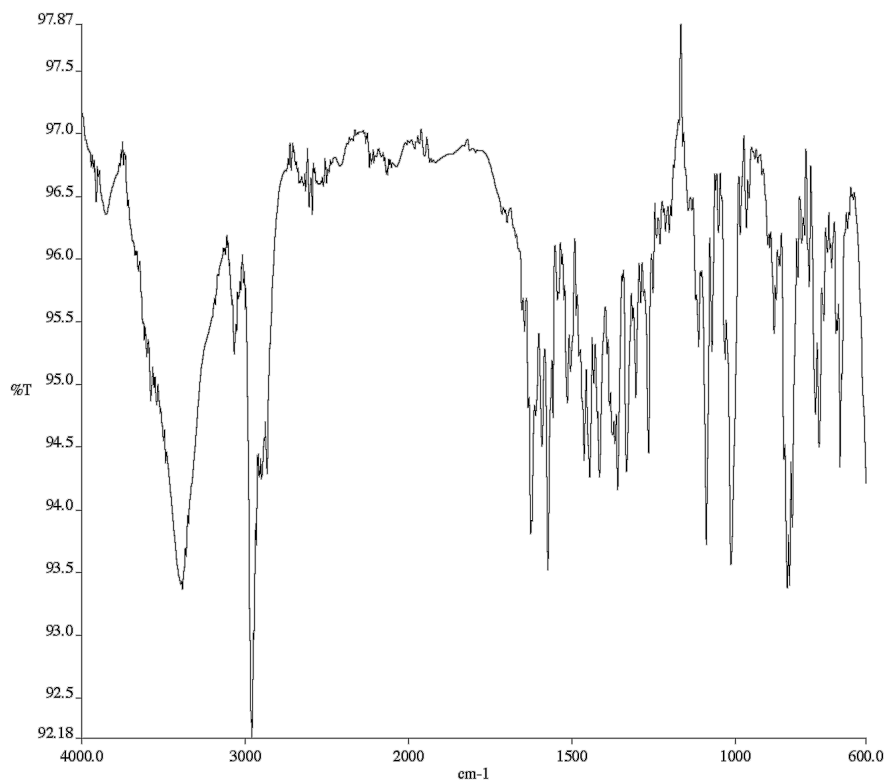

Infrared spectrum (Thin Film, NaCl) of compound **7b**.

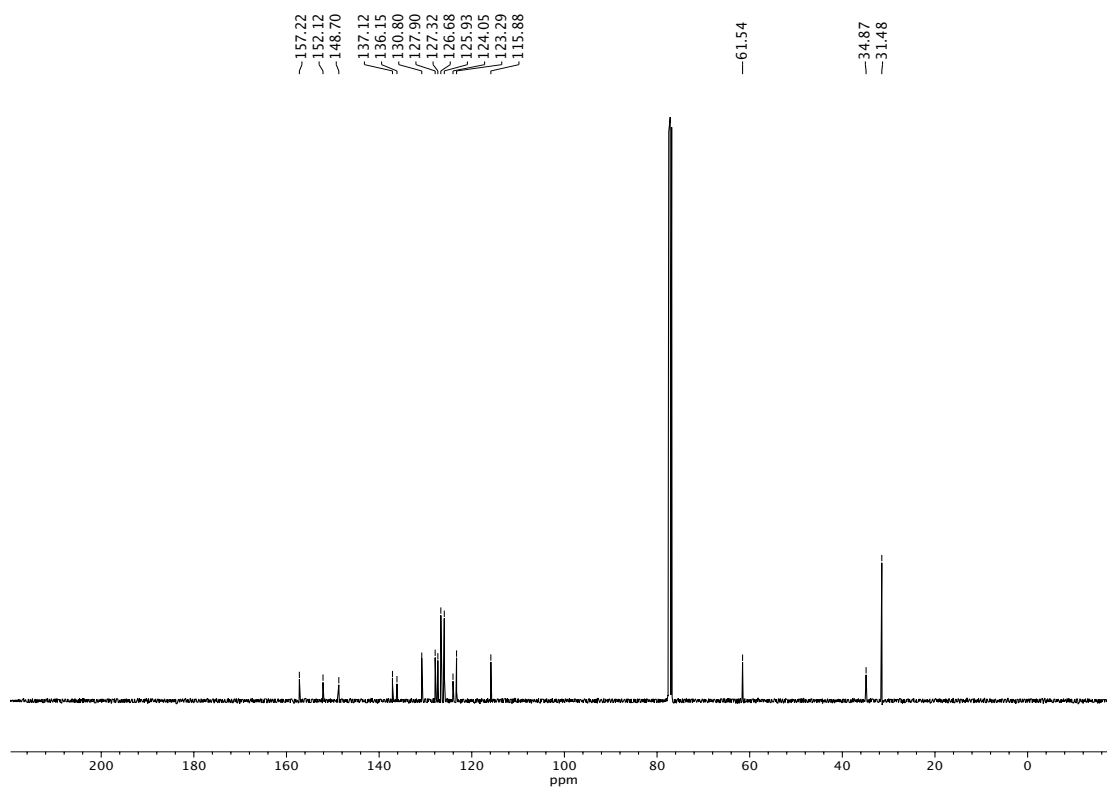

<sup>13</sup>C NMR (100 MHz, CDCl<sub>3</sub>) of compound **7b**.

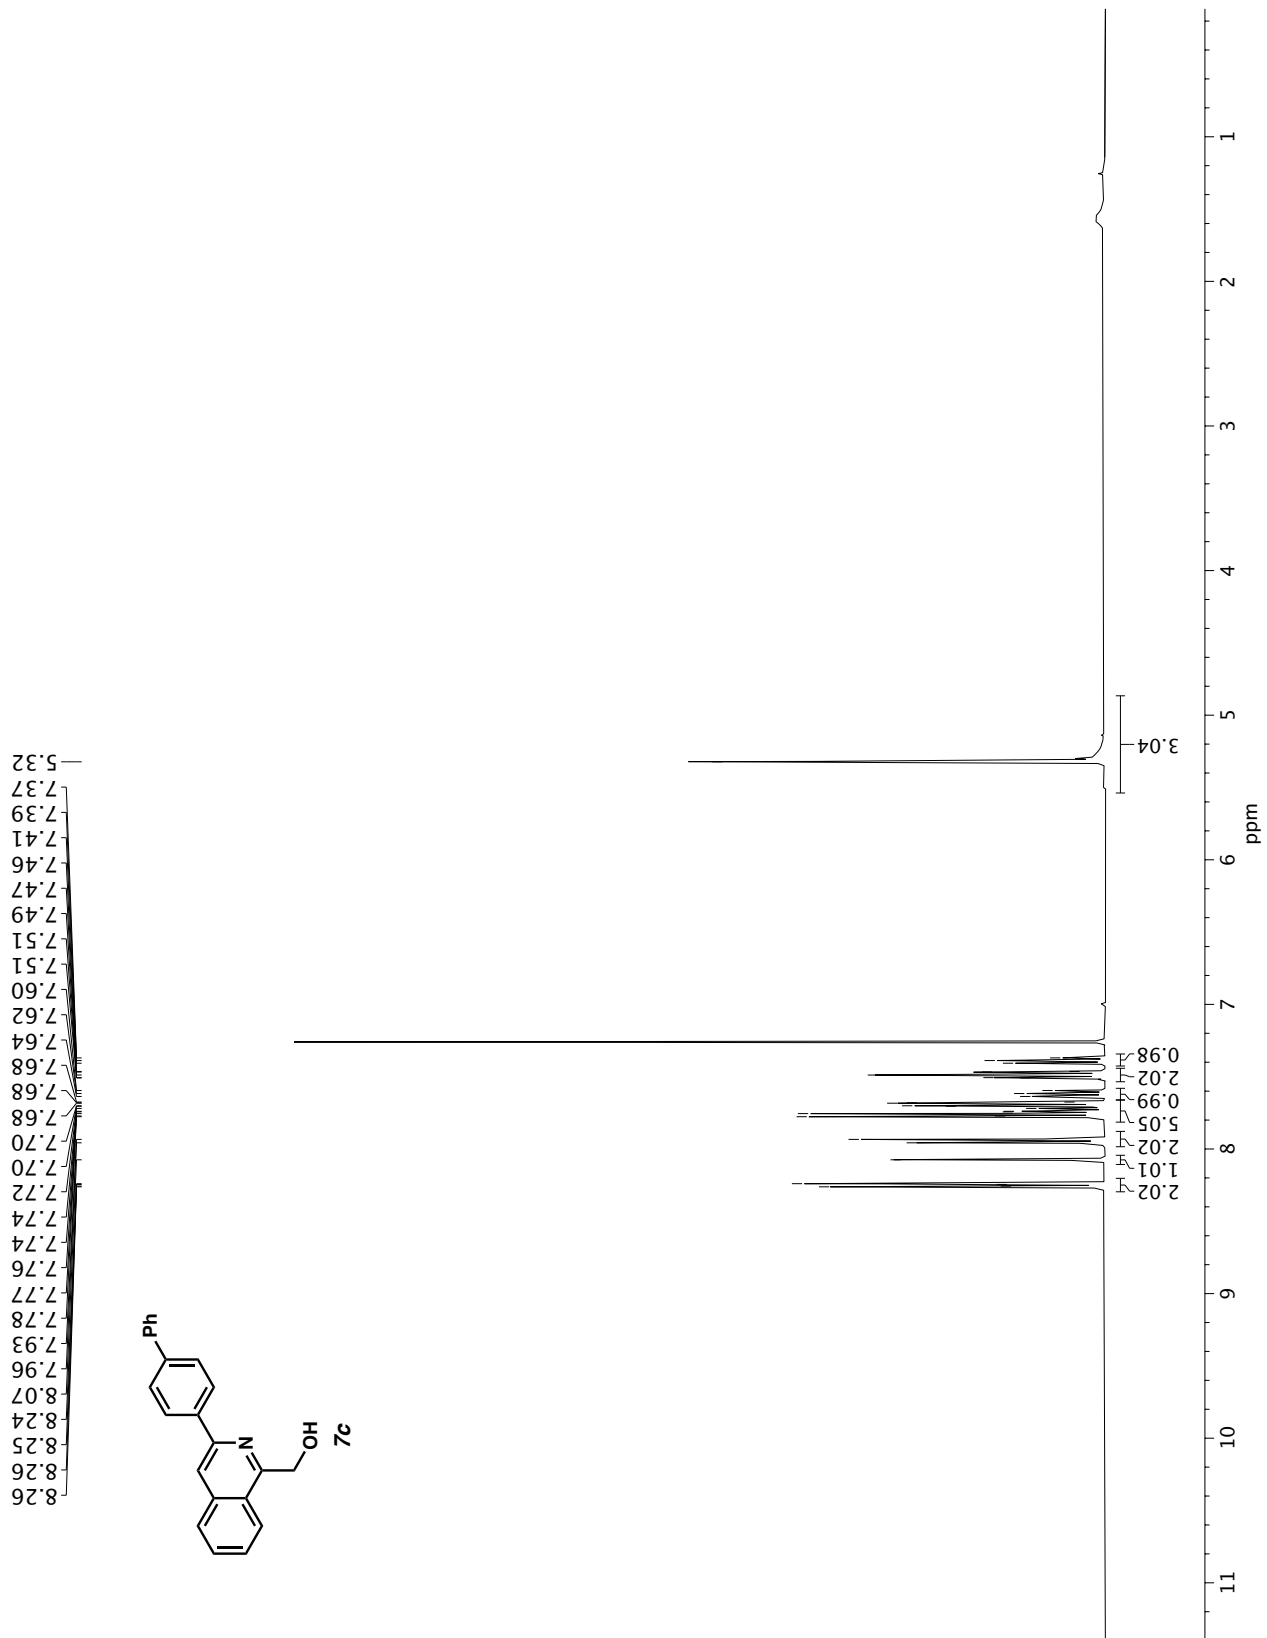

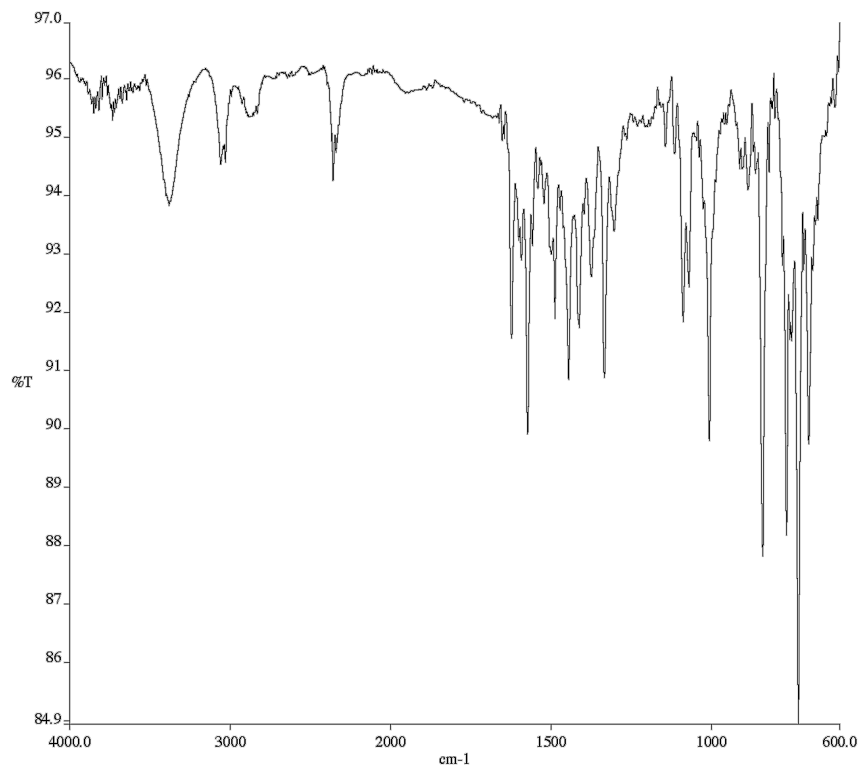

Infrared spectrum (Thin Film, NaCl) of compound **7c**.

-157.43  
 -146.26  
 -141.67  
 -140.71  
 -137.81  
 -137.07  
 -130.92  
 -129.01  
 -127.98  
 -127.69  
 -127.67  
 -127.55  
 -127.32  
 -127.24  
 -124.21  
 -123.33  
 -116.19  
 -61.60

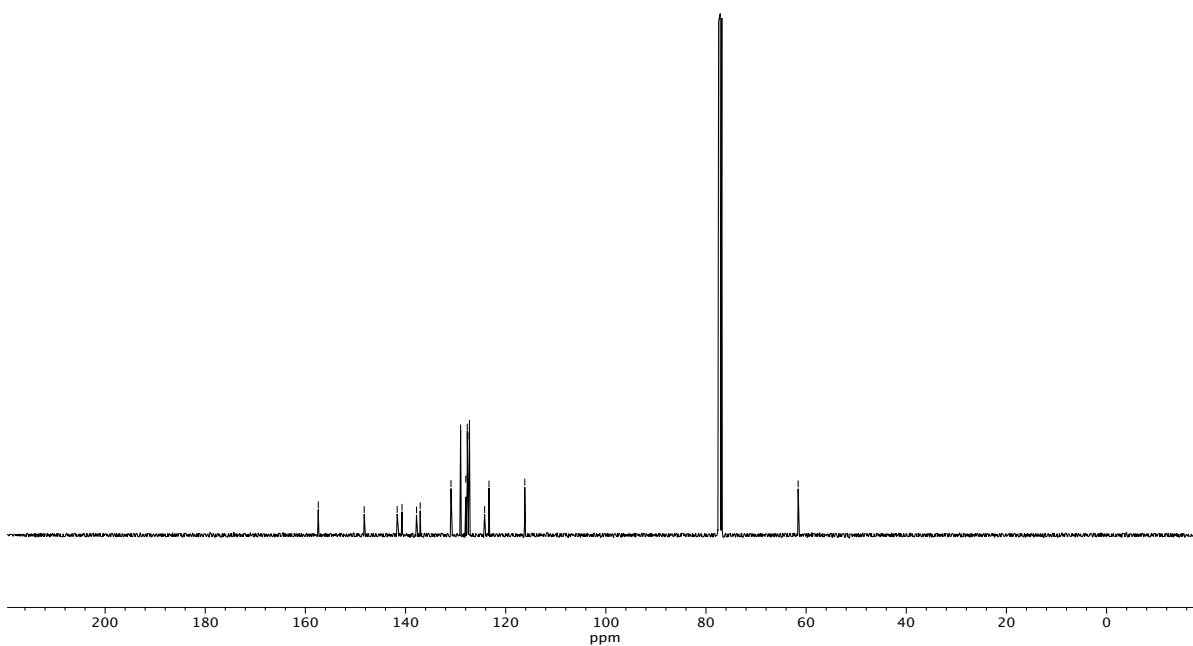

$^{13}\text{C}$  NMR (100 MHz,  $\text{CDCl}_3$ ) of compound **7c**.

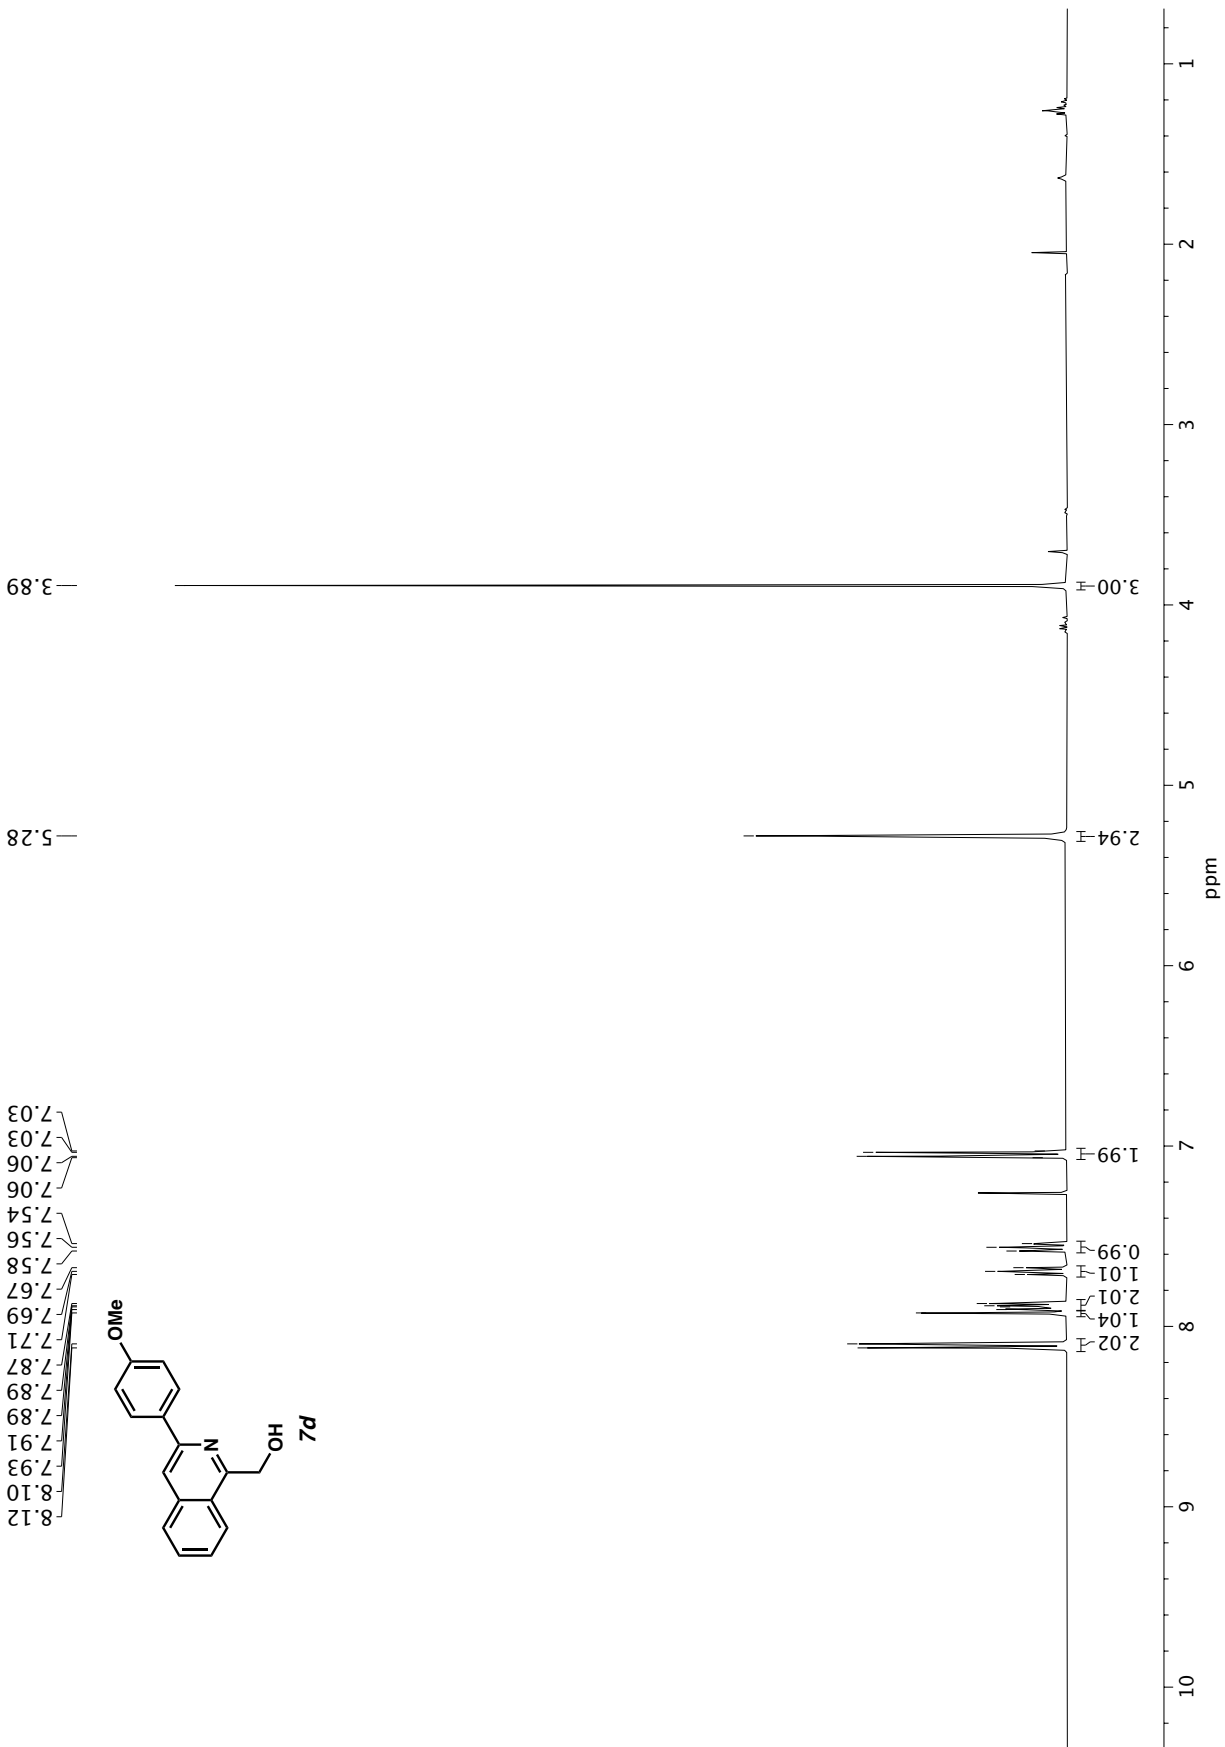

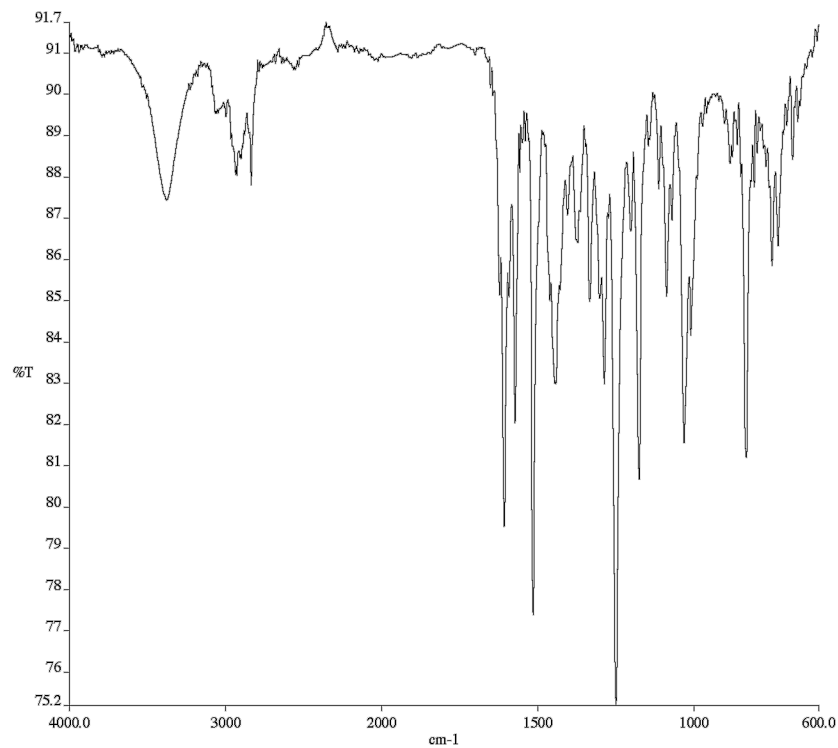

Infrared spectrum (Thin Film, NaCl) of compound **7d**.

—160.32  
 —157.03  
 —148.30  
 —137.06  
 —131.42  
 —130.66  
 —128.06  
 —127.65  
 —126.99  
 —123.68  
 —123.14  
 —114.97  
 —114.22

—61.41  
 —55.42

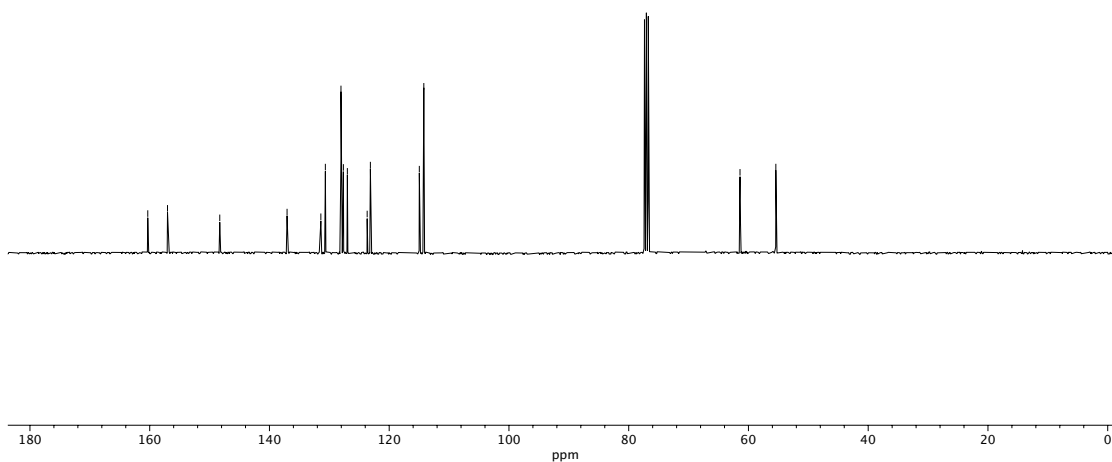

$^{13}\text{C}$  NMR (100 MHz,  $\text{CDCl}_3$ ) of compound **7d**.



<sup>1</sup>H NMR (400 MHz, CDCl<sub>3</sub>) of compound **7e**.

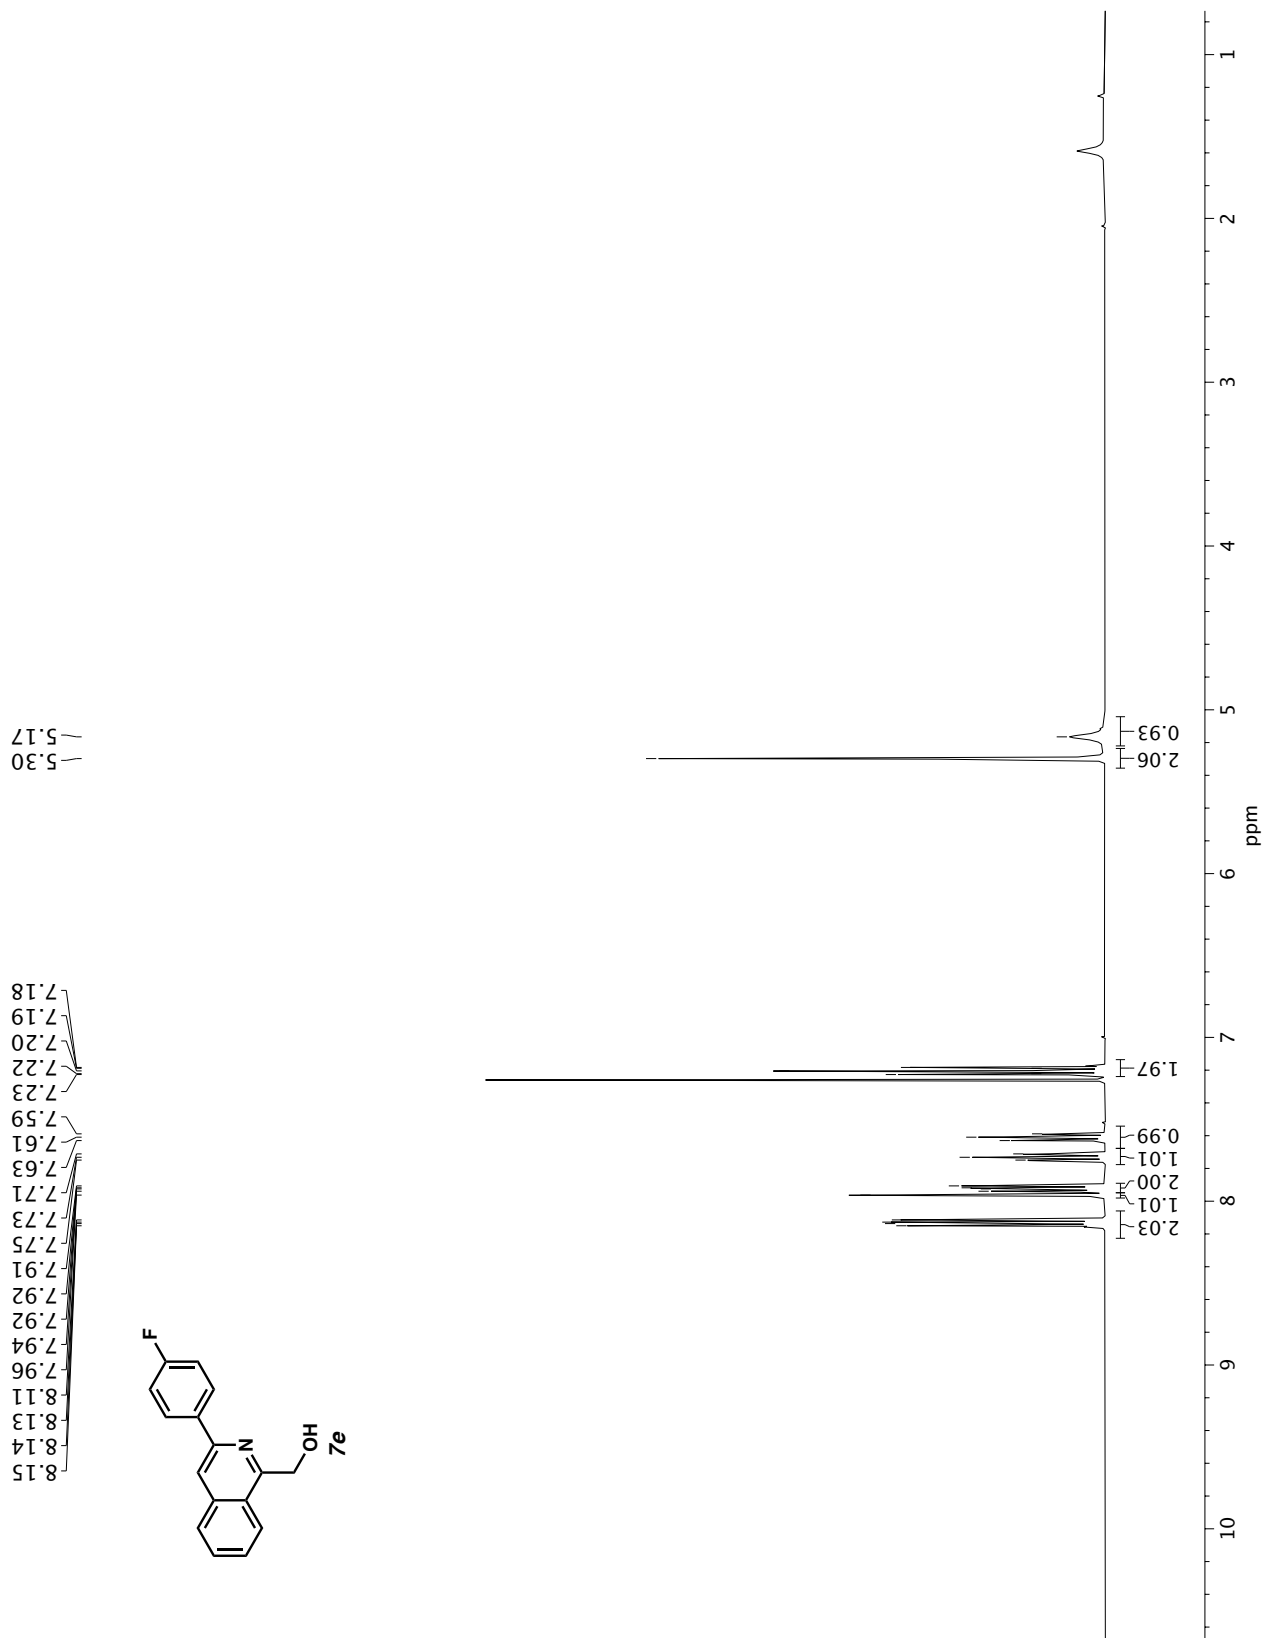

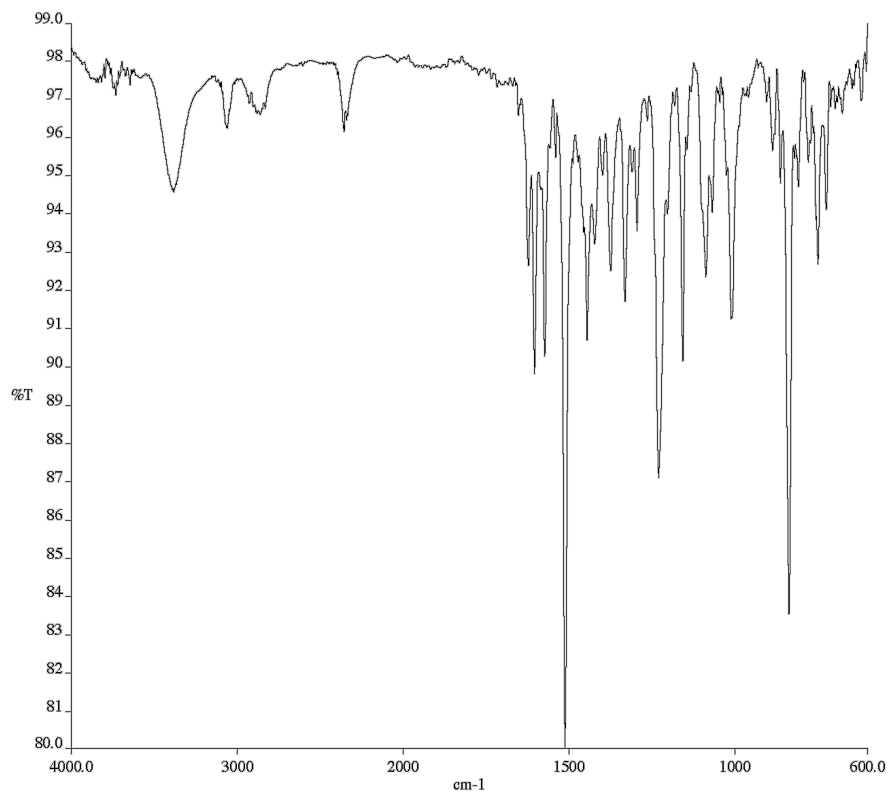

Infrared spectrum (Thin Film, NaCl) of compound **7e**.

164.73  
 162.26  
 157.49  
 147.75  
 137.03  
 135.11  
 135.08  
 130.99  
 128.73  
 128.65  
 127.89  
 127.59  
 124.08  
 123.32  
 115.96  
 115.77  
 61.57

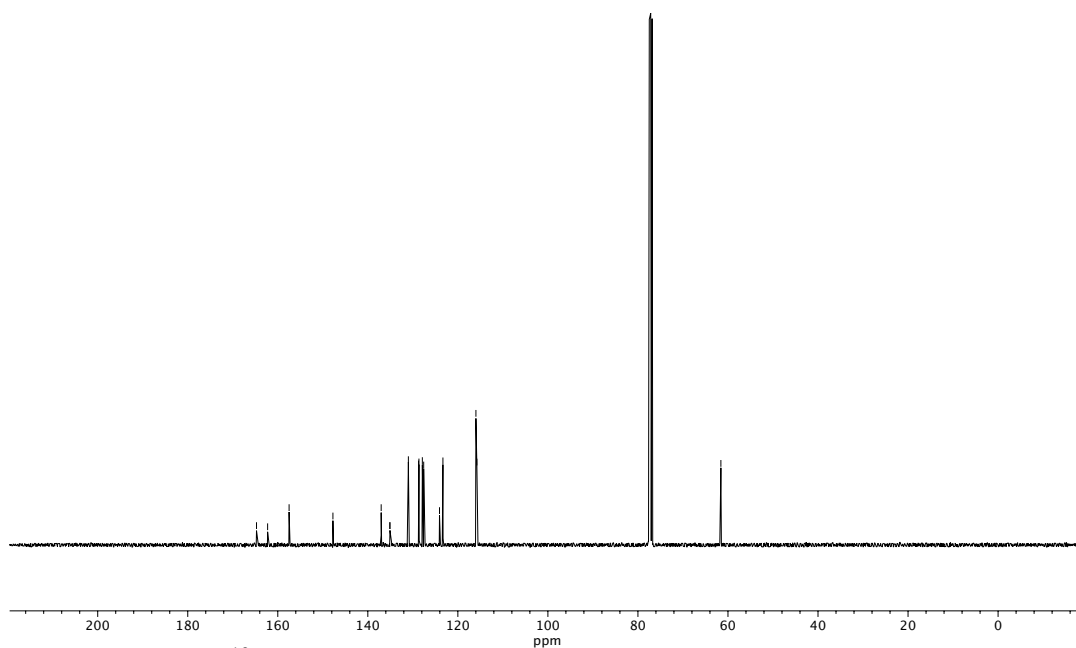

$^{13}\text{C}$  NMR (100 MHz,  $\text{CDCl}_3$ ) of compound **7e**.

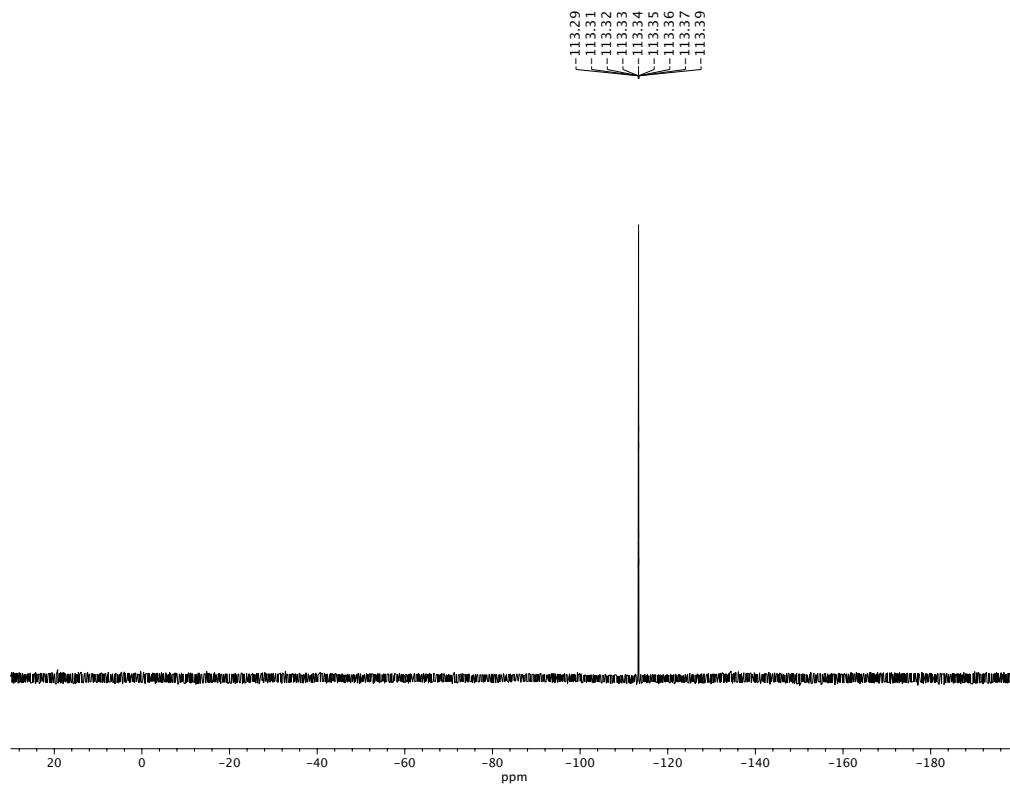

$^{19}\text{F}$  NMR (282 MHz,  $\text{CDCl}_3$ ) of 7e.

8.27  
8.25  
8.07  
8.07  
7.97  
7.95  
7.78  
7.77  
7.75  
7.68  
7.66  
7.64

5.32  
5.10

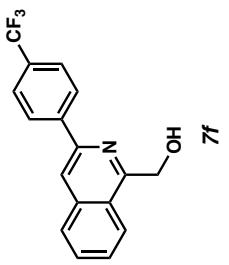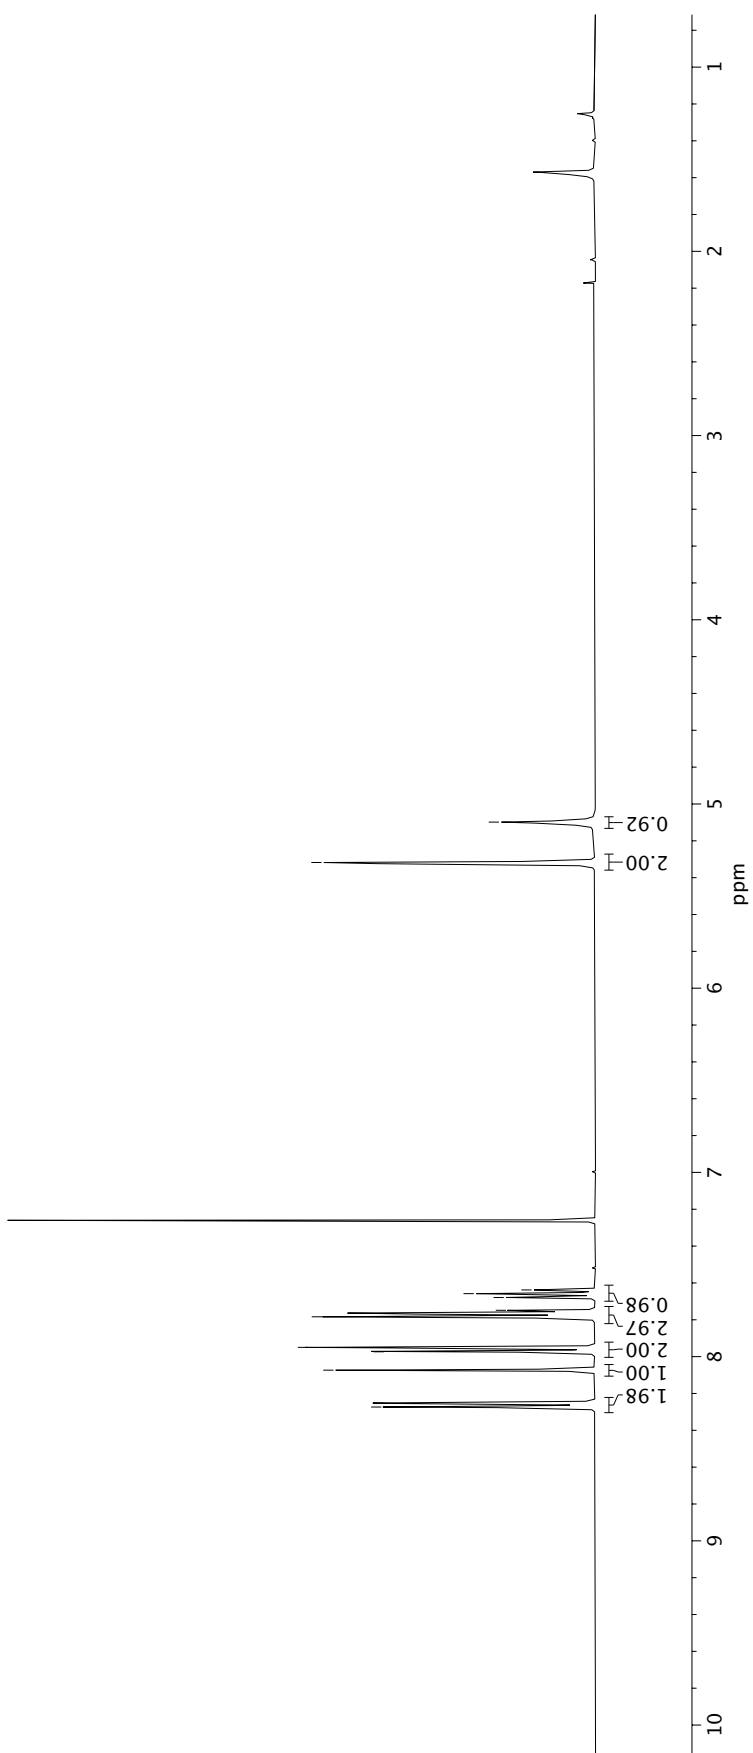

<sup>1</sup>H NMR (400 MHz, CDCl<sub>3</sub>) of compound 7f.

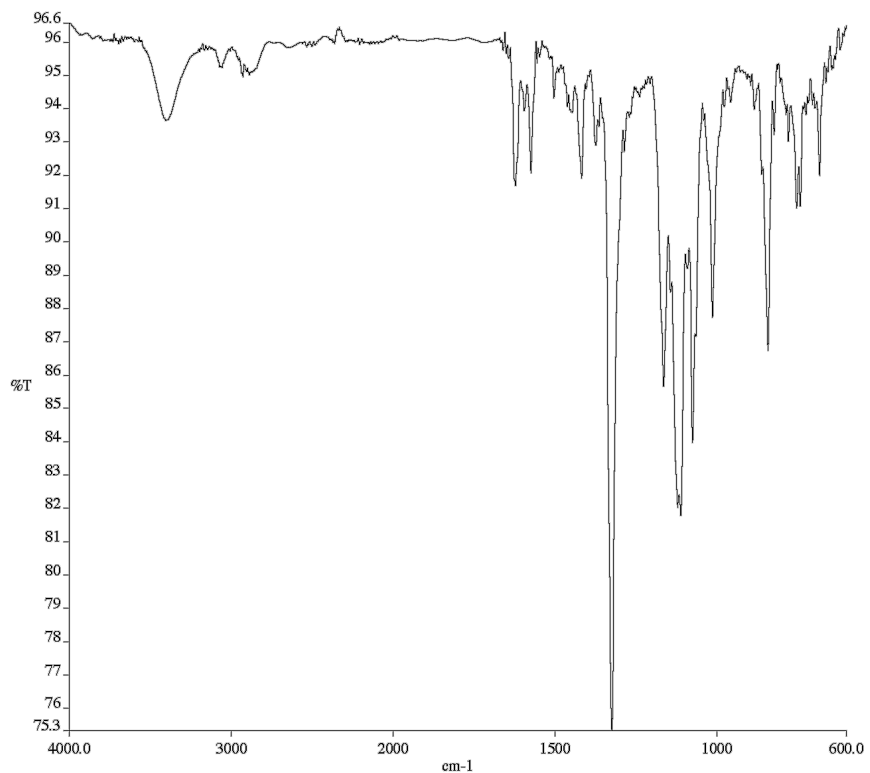

-157.89  
 -147.14  
 -142.30  
 -136.84  
 -131.19  
 -130.83  
 -130.51  
 -130.19  
 -128.17  
 -128.11  
 -127.16  
 -125.95  
 -125.91  
 -125.88  
 -125.84  
 -125.70  
 -124.56  
 -123.38  
 -122.99  
 -120.29  
 -117.21  
 -61.63

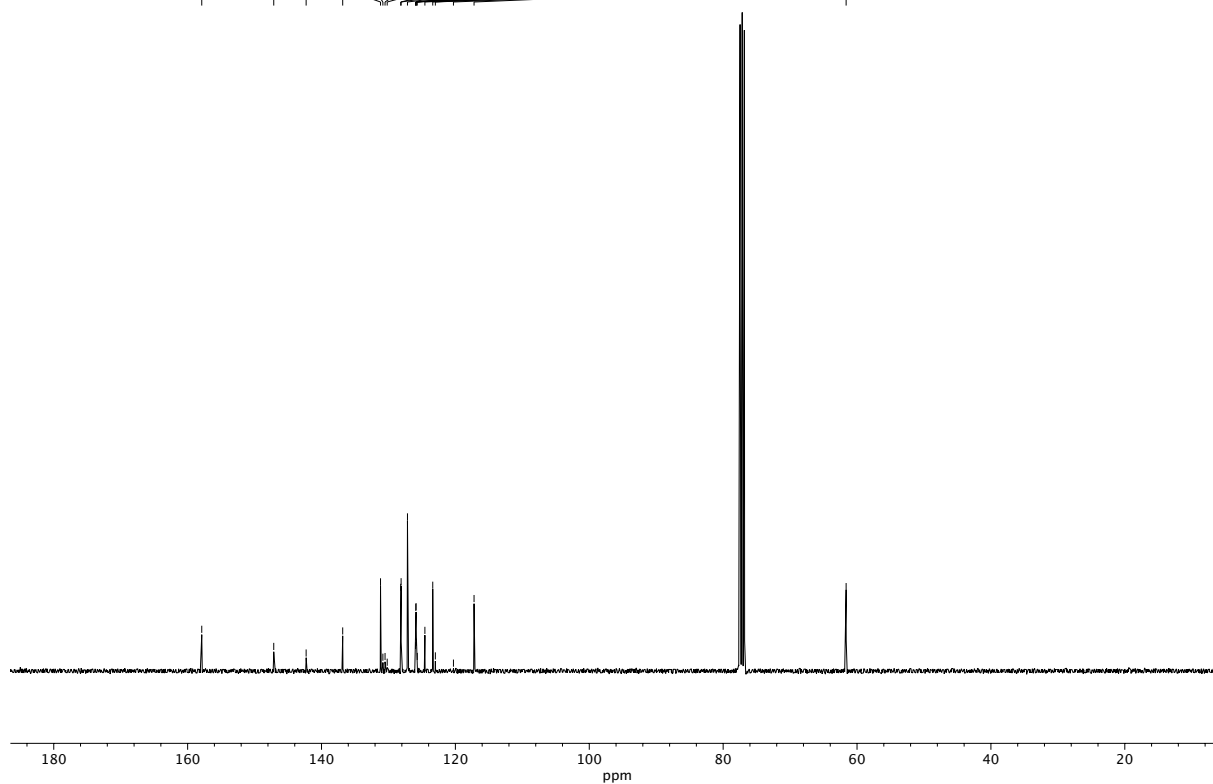

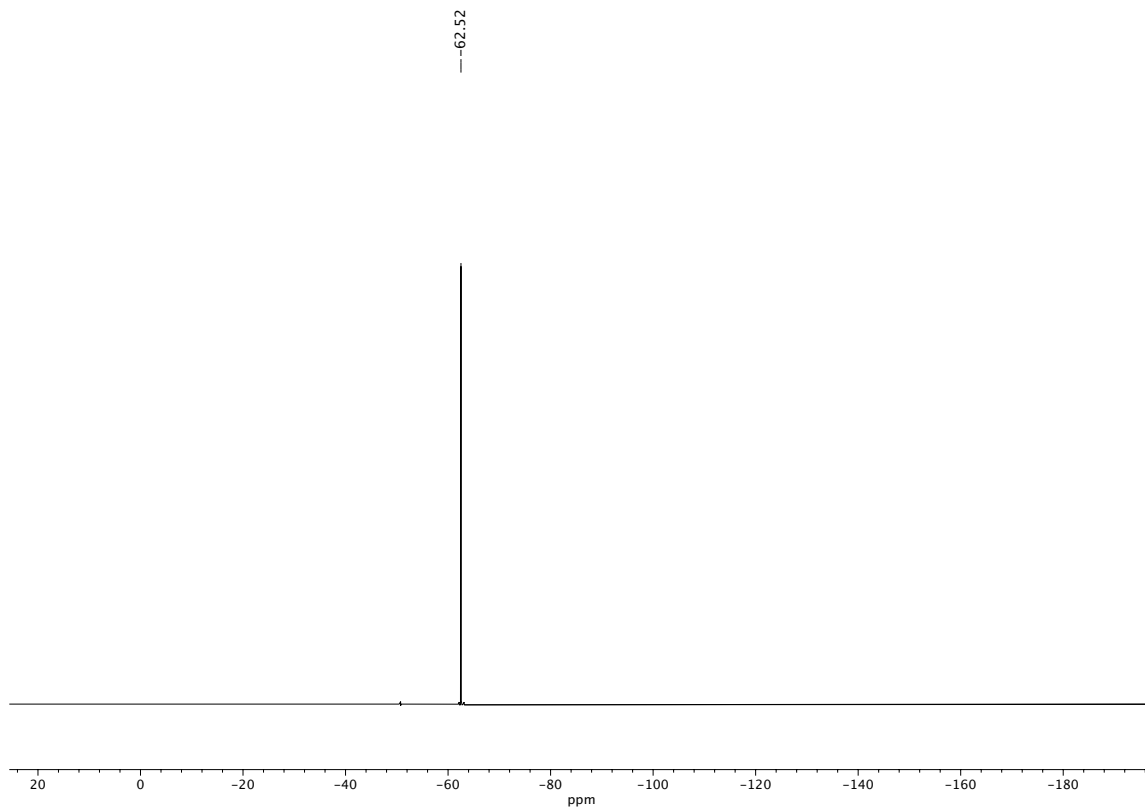

$^{19}\text{F}$  NMR (282 MHz,  $\text{CDCl}_3$ ) of **7f**.

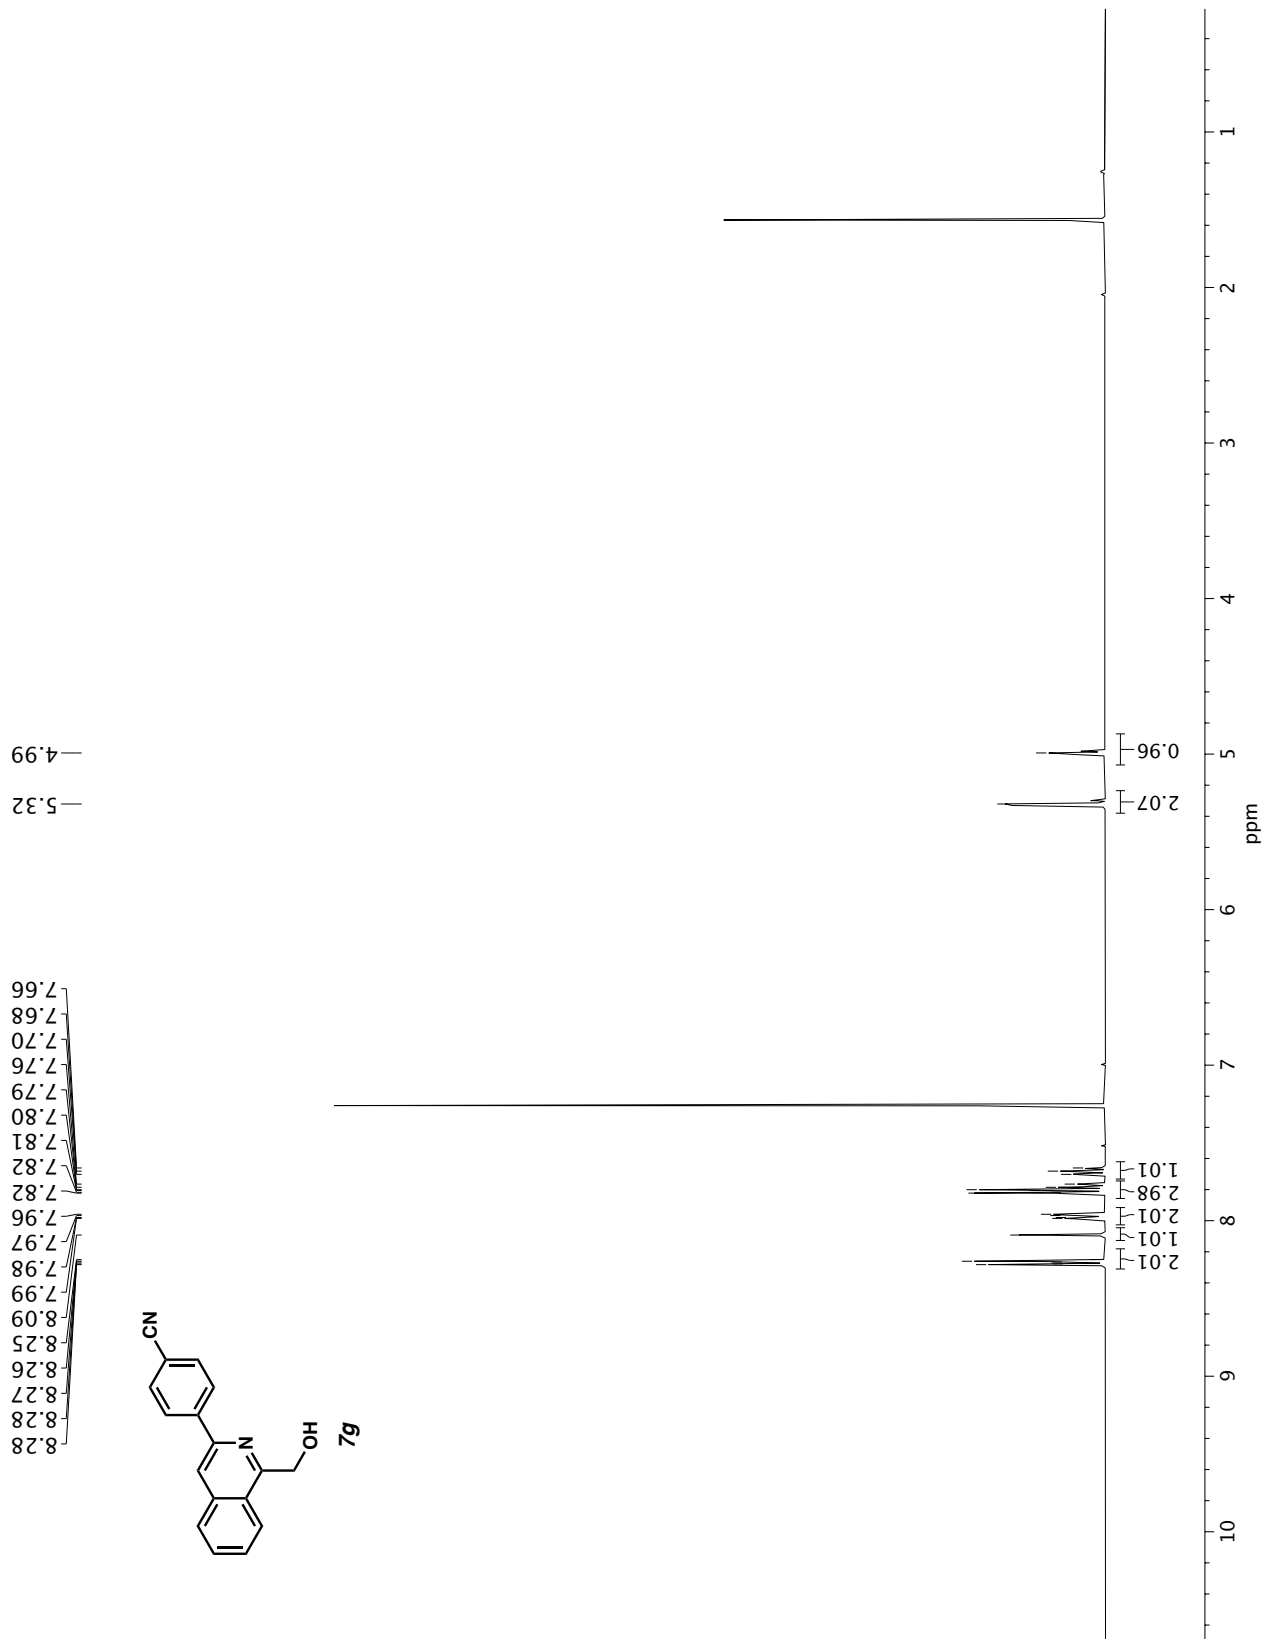

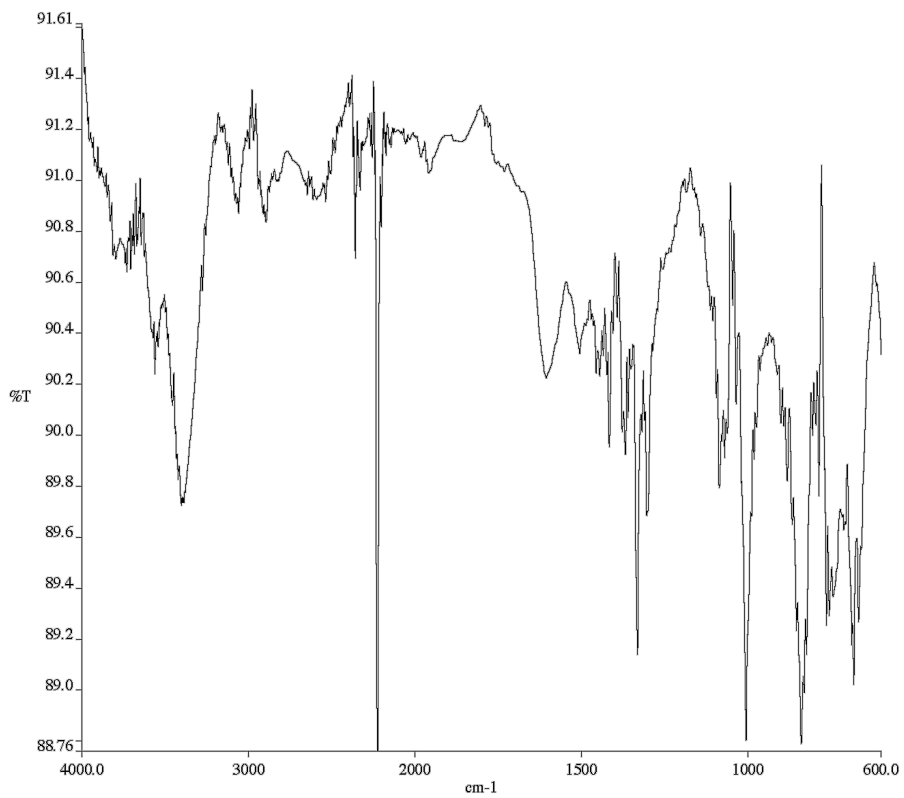

Infrared spectrum (Thin Film, NaCl) of compound **7g**.

— 158.16 — 146.50 — 143.16 — 136.73 — 132.78 — 131.36 — 128.52 — 128.22 — 127.40 — 124.73 — 123.46 — 119.02 — 117.67 — 112.26 — 61.68

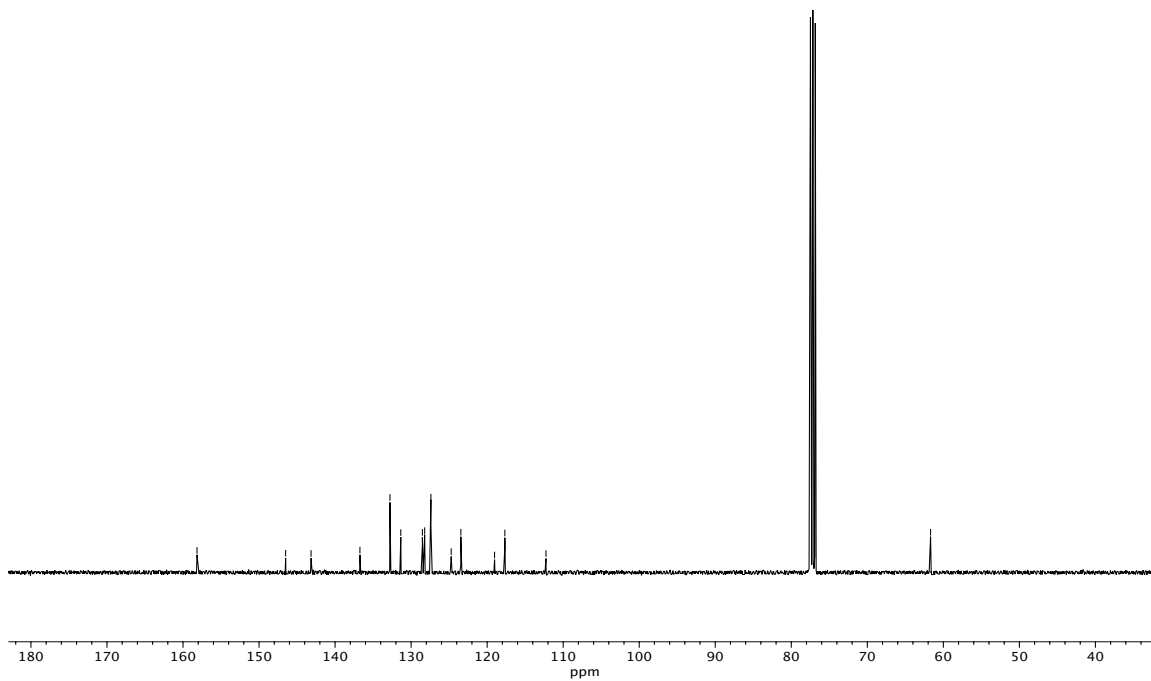

$^{13}\text{C}$  NMR (100 MHz,  $\text{CDCl}_3$ ) of compound **7g**.



8.96  
8.95  
8.95  
8.53  
8.51  
8.29  
8.28  
8.28  
8.27  
8.26  
8.11  
7.99  
7.96  
7.80  
7.78  
7.76  
7.71  
7.69  
7.67  
7.65

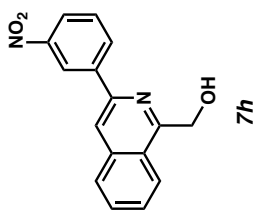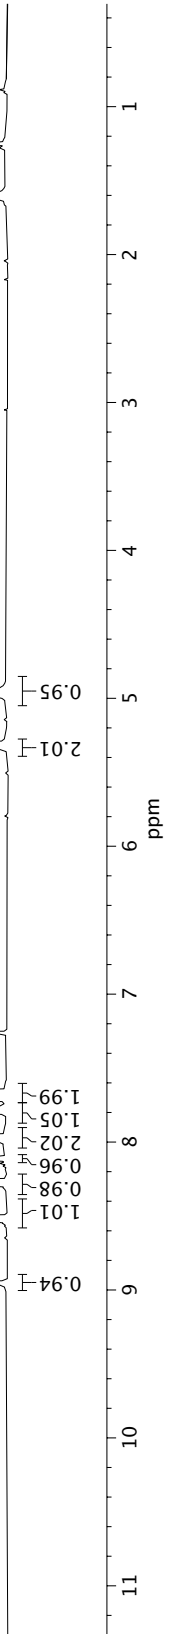

<sup>1</sup>H NMR (400 MHz, CDCl<sub>3</sub>) of compound **7h**.

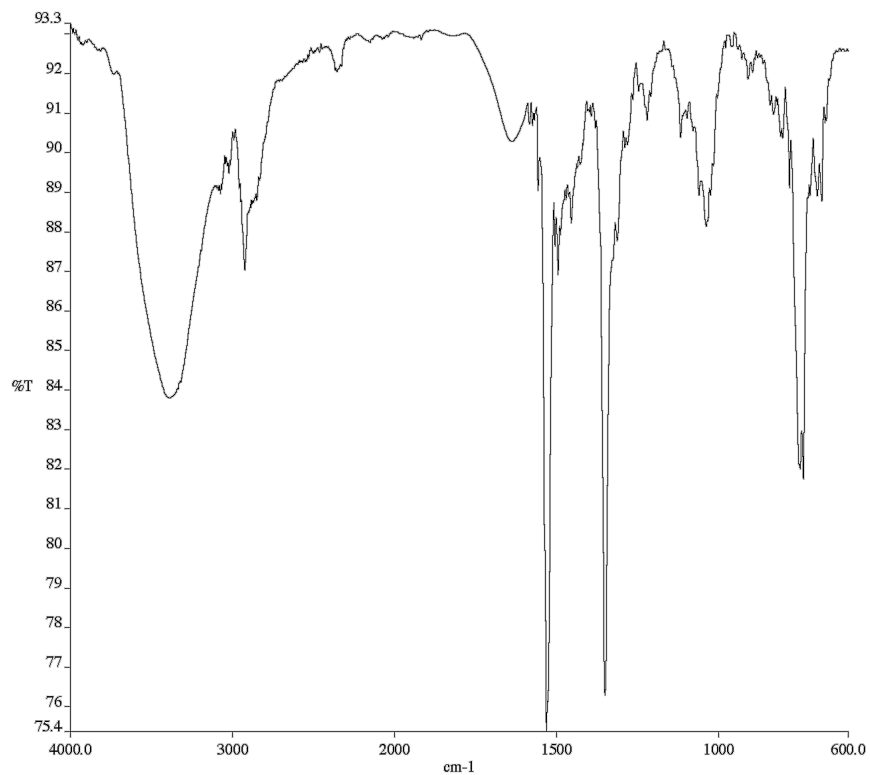

Infrared spectrum (Thin Film, NaCl) of compound **7h**.

—158.23  
 —148.99  
 —146.13  
 —140.70  
 —136.78  
 —132.73  
 —131.37  
 —129.93  
 —128.41  
 —128.15  
 —124.69  
 —123.45  
 —123.43  
 —121.63  
 —117.22  
 —61.71

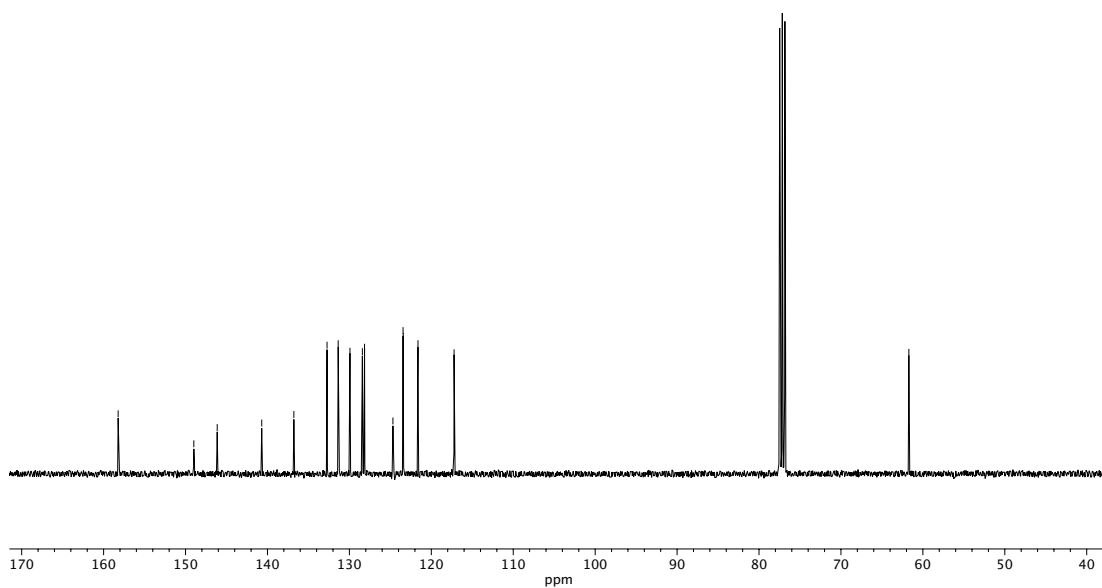

$^{13}\text{C}$  NMR (100 MHz,  $\text{CDCl}_3$ ) of compound **7h**.

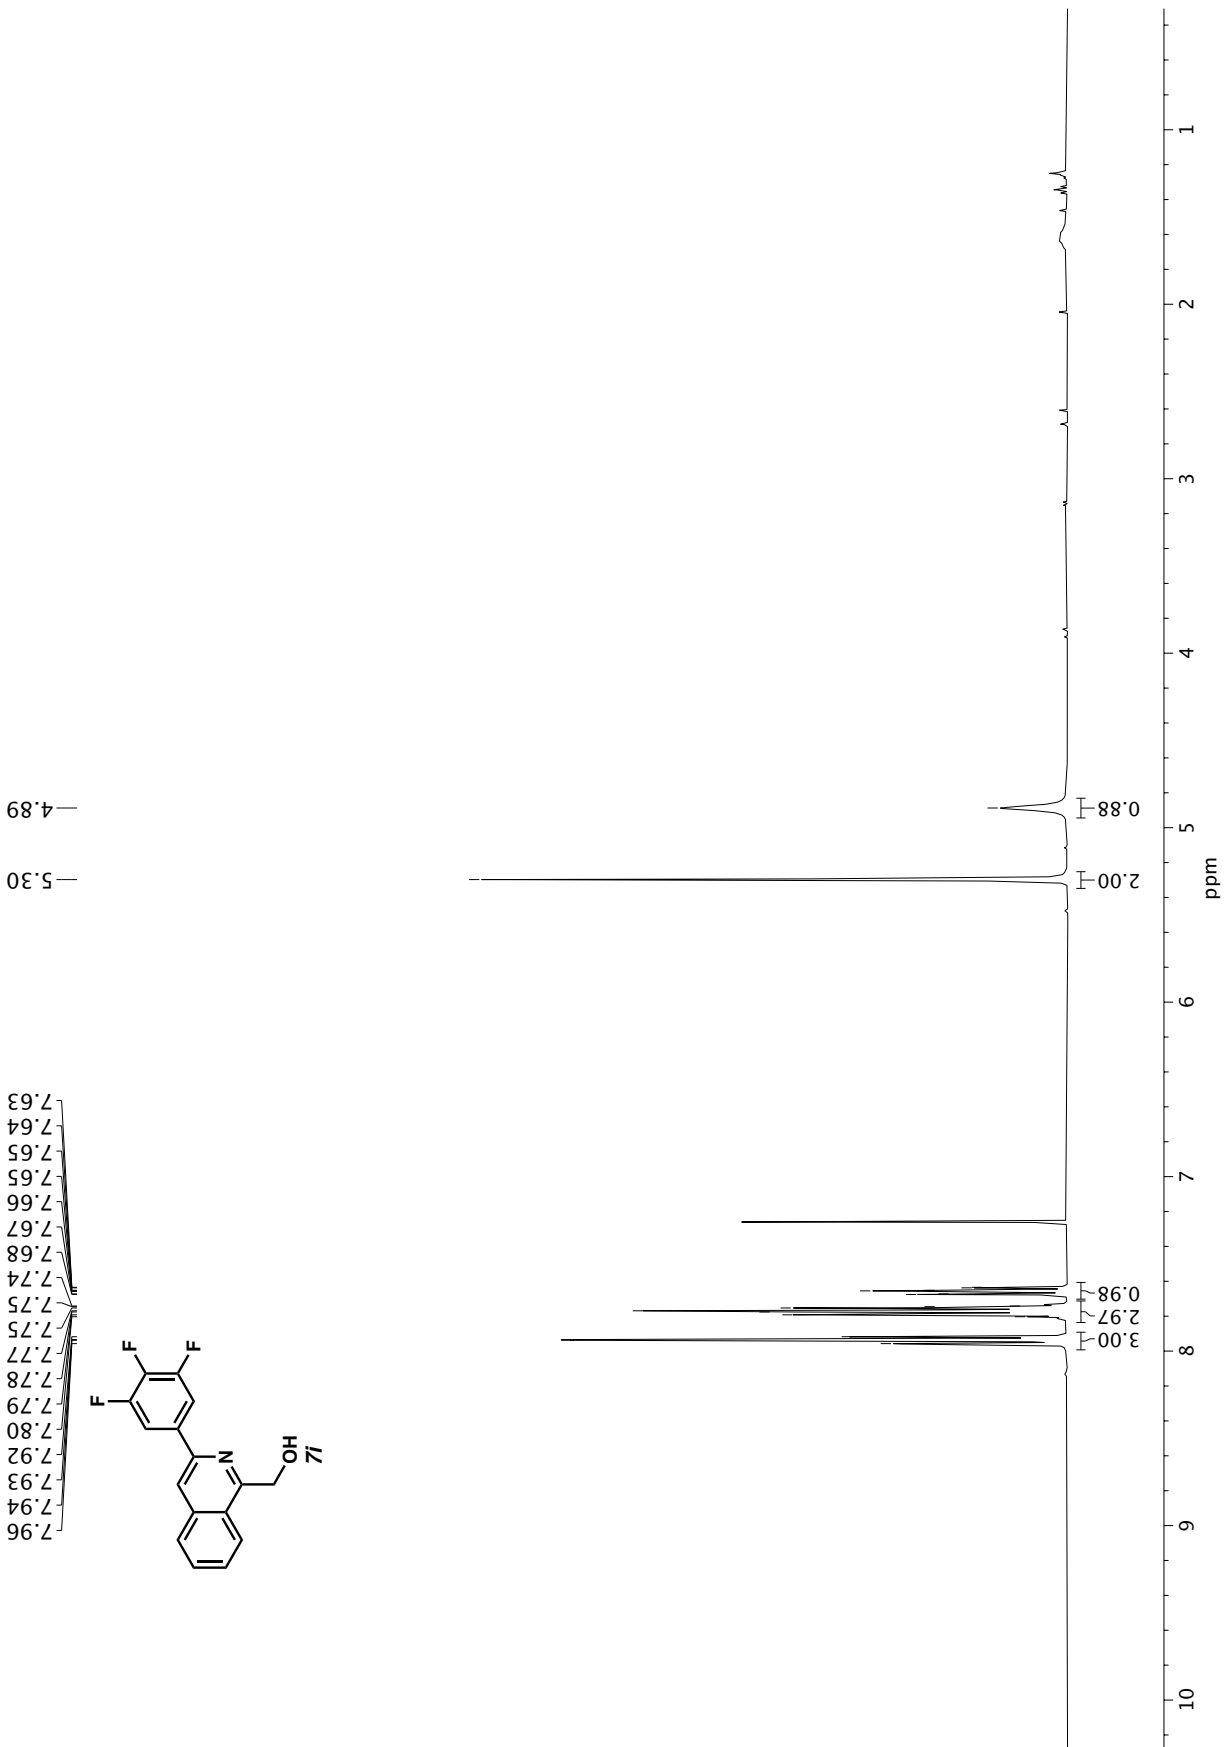

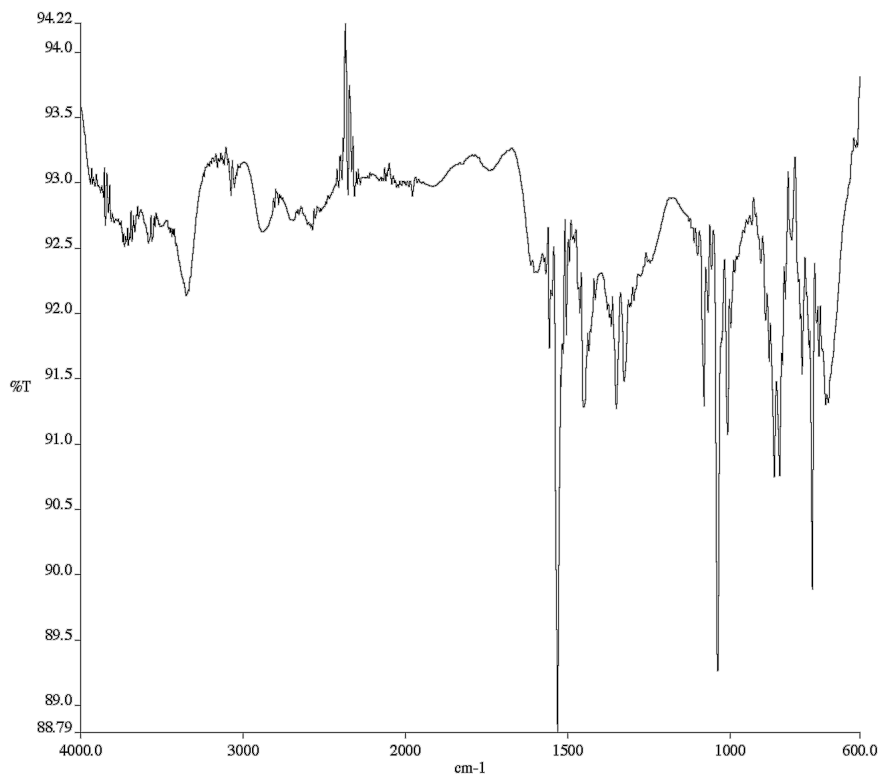

Infrared spectrum (Thin Film, NaCl) of compound **7i**.

158.06  
153.04  
153.00  
152.93  
152.80  
150.56  
150.52  
150.46  
150.42  
145.43  
145.40  
141.63  
141.48  
141.32  
139.11  
138.96  
138.80  
136.74  
135.09  
135.04  
131.36  
128.32  
128.05  
124.55  
123.44  
116.62  
116.61  
110.90  
110.84  
110.74  
110.68

61.66

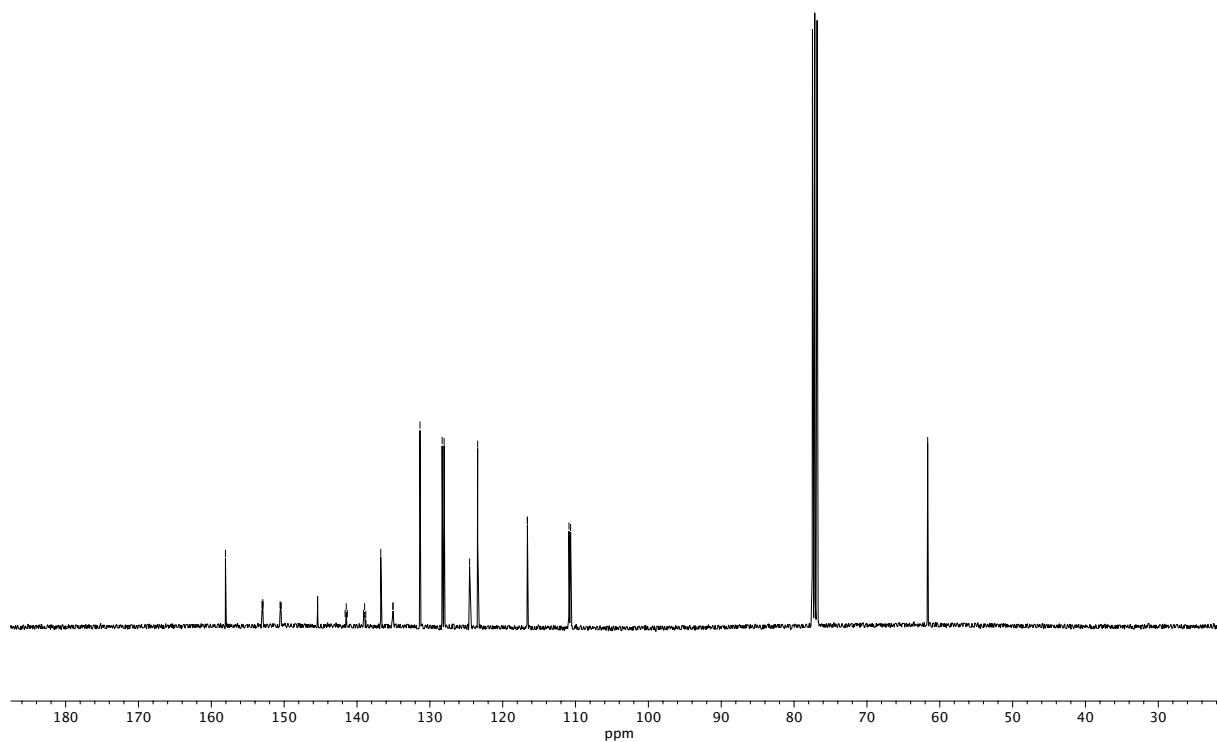

$^{13}\text{C}$  NMR (100 MHz,  $\text{CDCl}_3$ ) of compound **7i**.

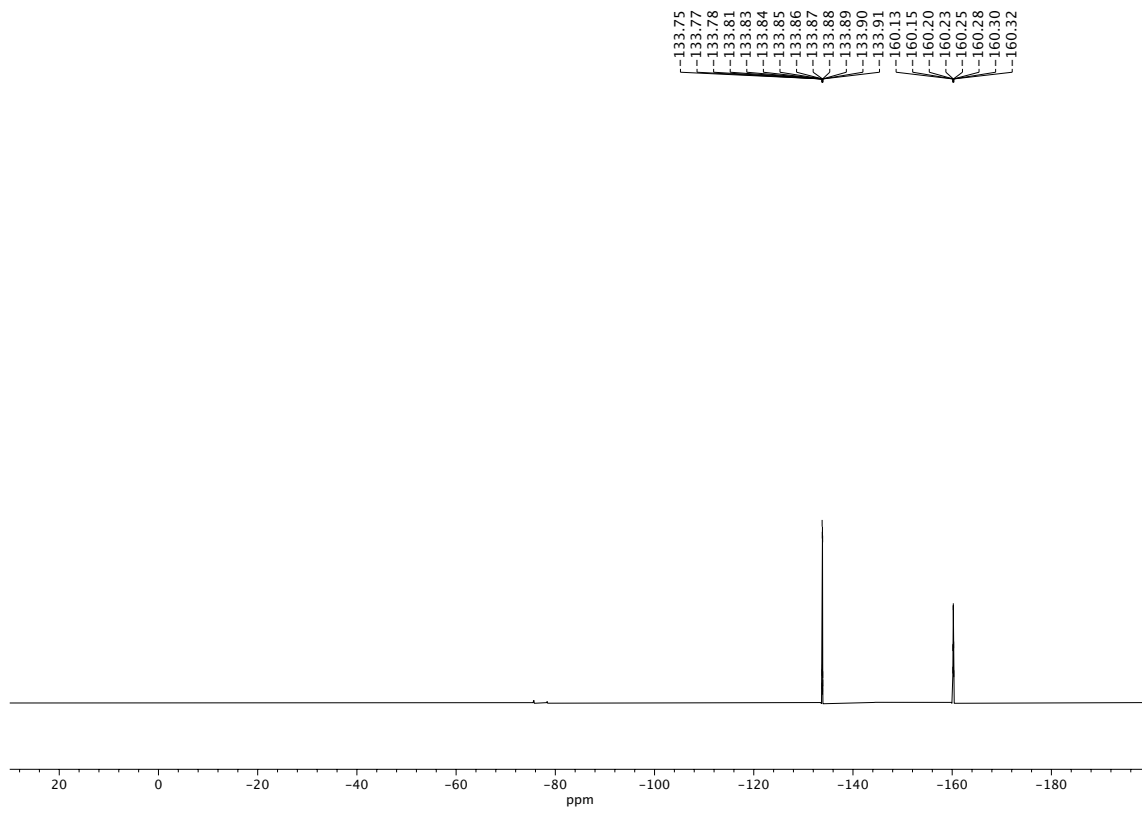

$^{19}\text{F}$  NMR (282 MHz,  $\text{CDCl}_3$ ) of **7i**.

<sup>1</sup>H NMR (400 MHz, CDCl<sub>3</sub>) of compound 7j.

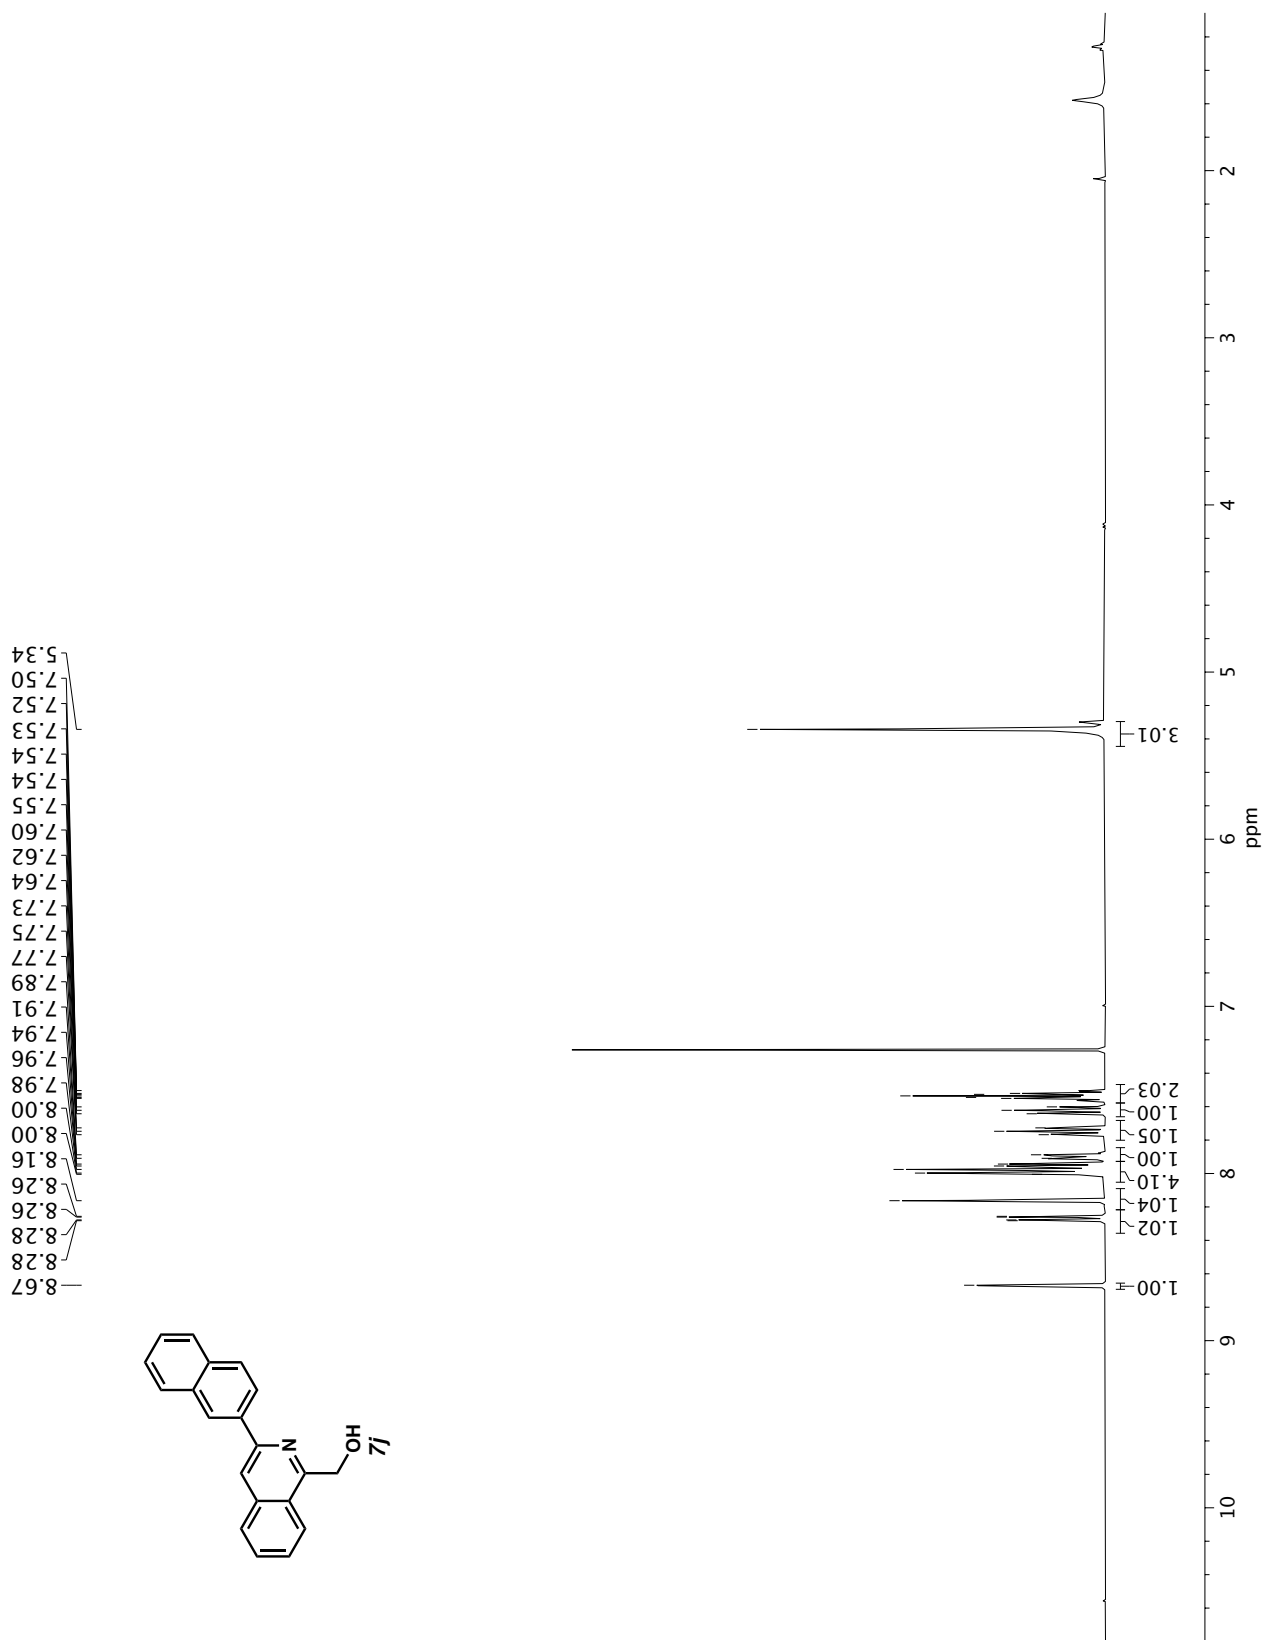

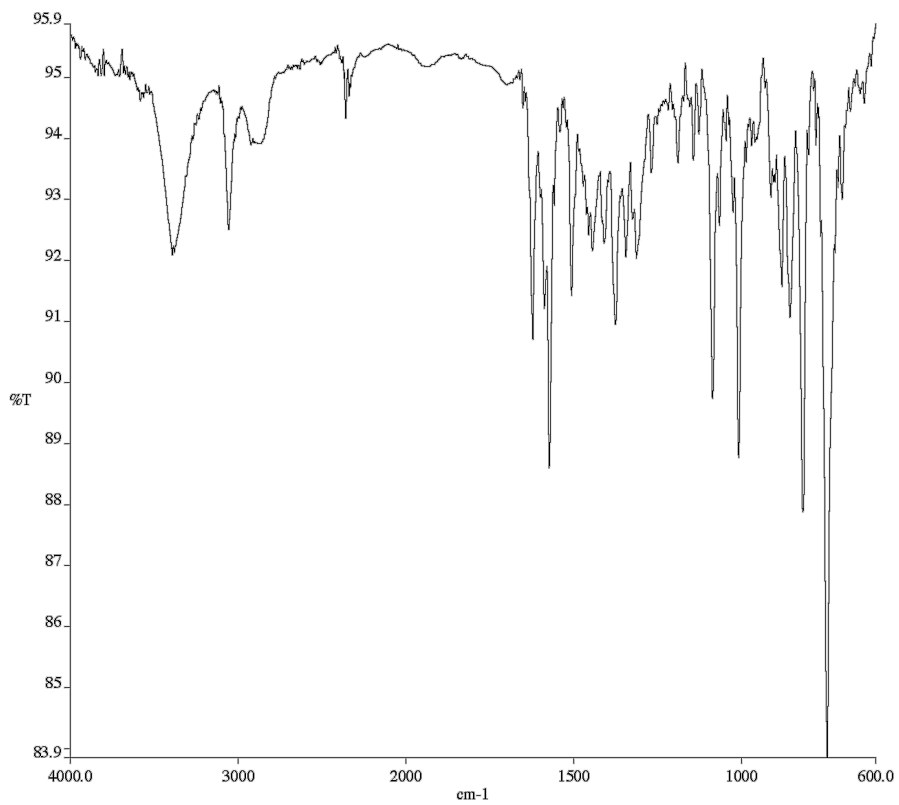

Infrared spectrum (Thin Film, NaCl) of compound **7j**.

-157.47  
 -148.53  
 -137.11  
 -136.17  
 -133.73  
 -133.66  
 -130.94  
 -128.82  
 -128.62  
 -128.00  
 -127.84  
 -127.59  
 -126.65  
 -126.56  
 -126.30  
 -124.56  
 -124.23  
 -123.34  
 -116.61  
 -61.64

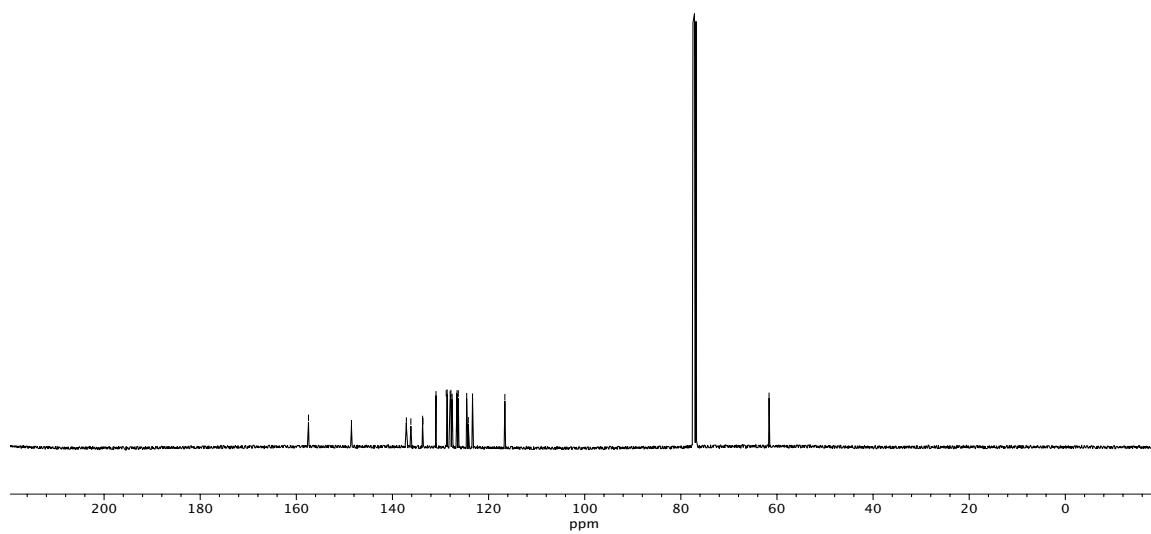

$^{13}\text{C}$  NMR (100 MHz,  $\text{CDCl}_3$ ) of compound **7j**.

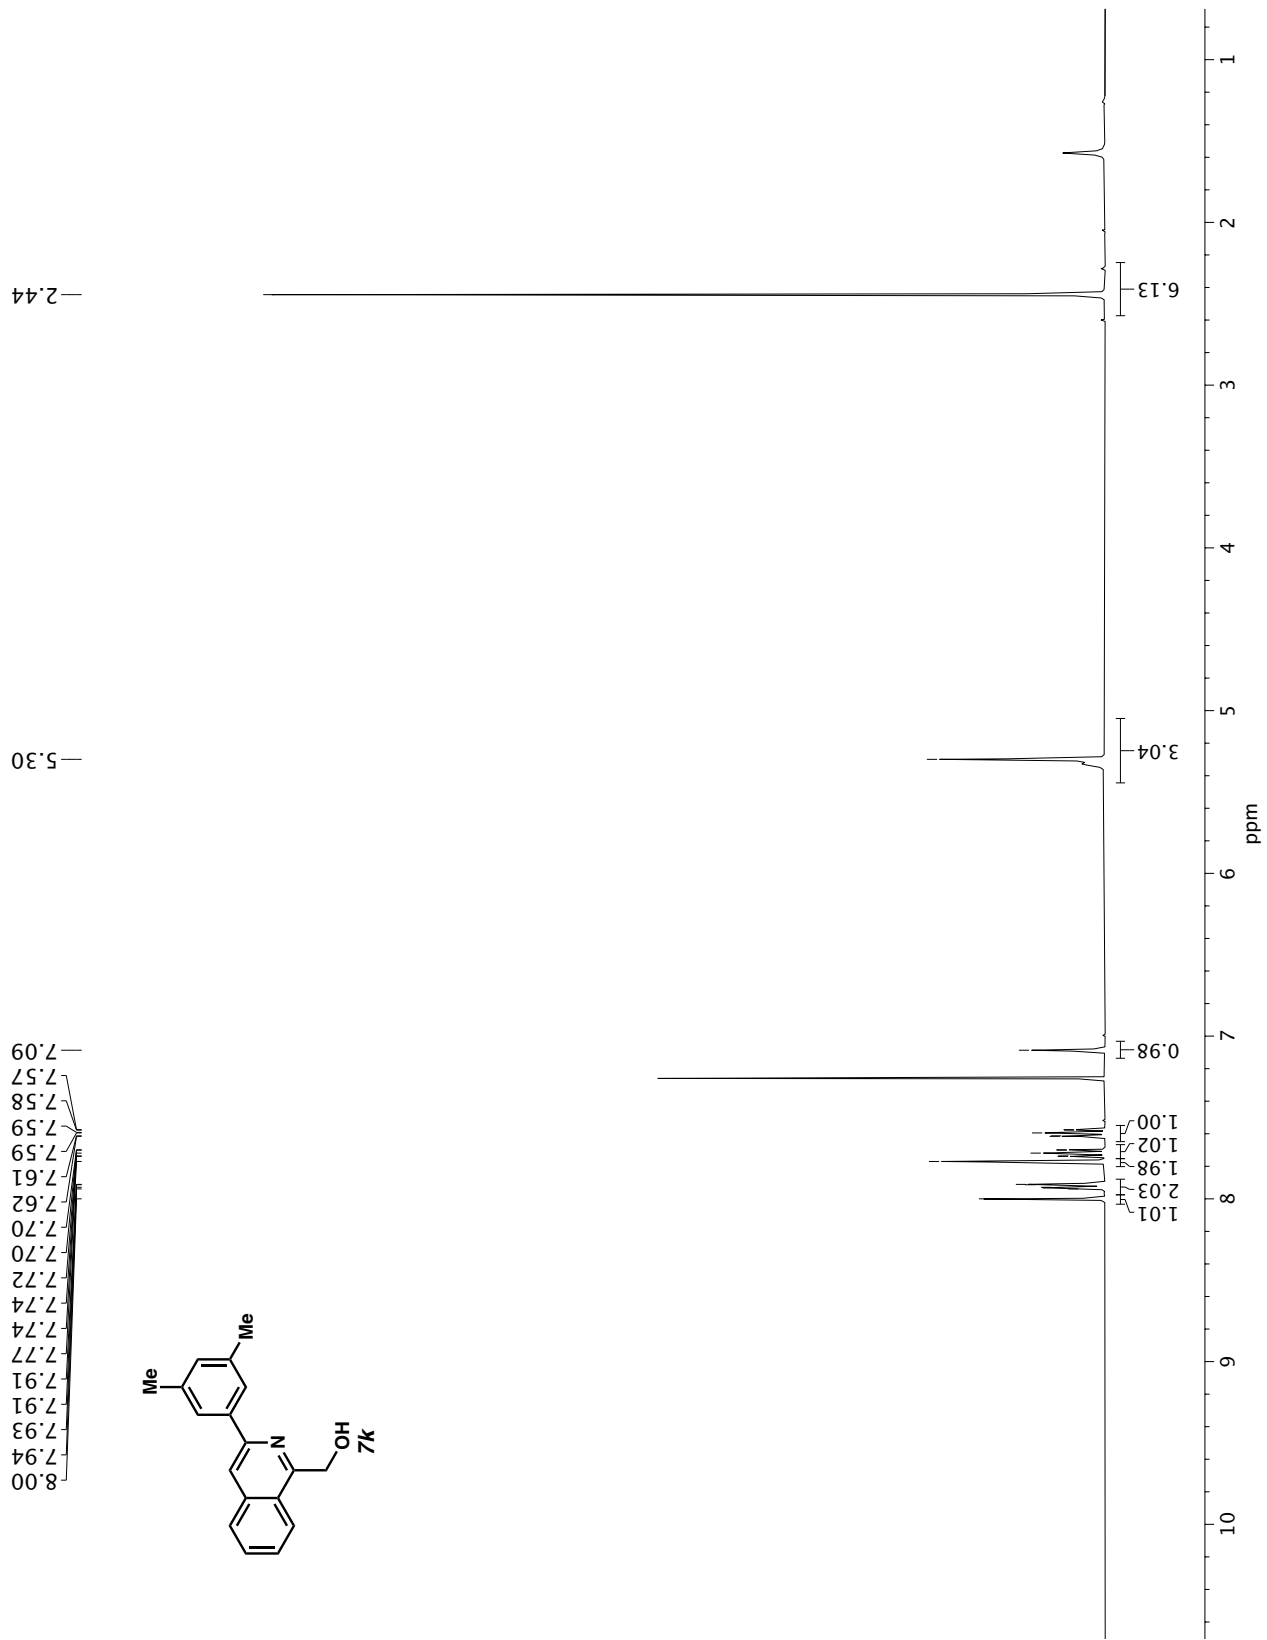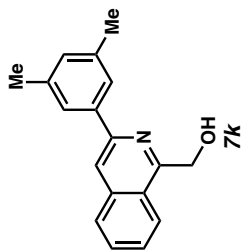



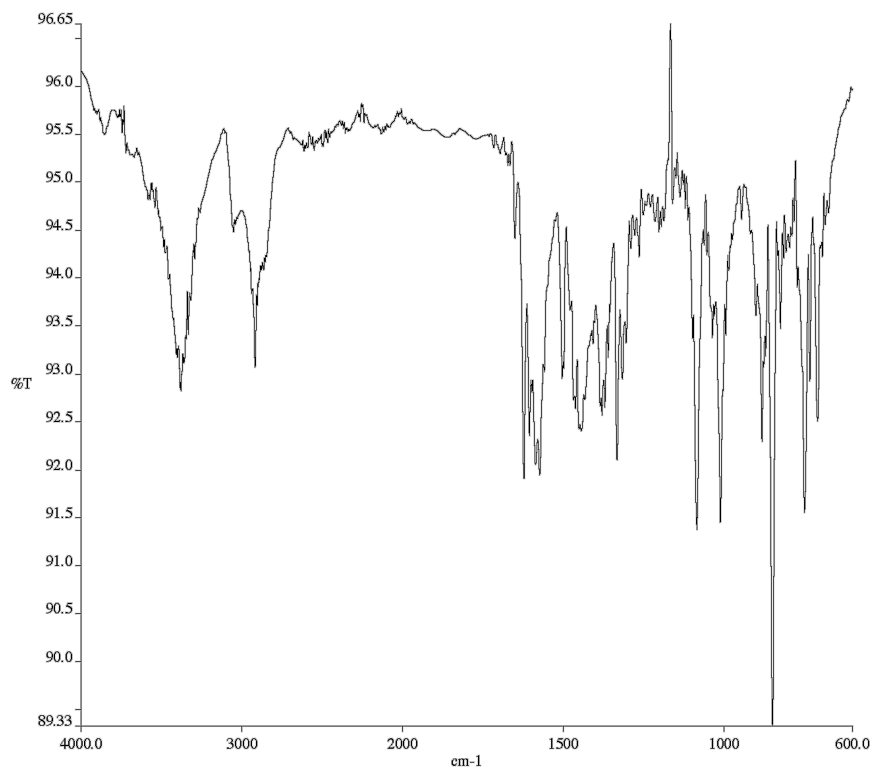

Infrared spectrum (Thin Film, NaCl) of compound **7k**.

157.16  
148.95  
138.88  
138.49  
137.09  
130.79  
130.61  
127.91  
127.37  
124.84  
124.11  
123.28  
116.27  
61.57  
21.65

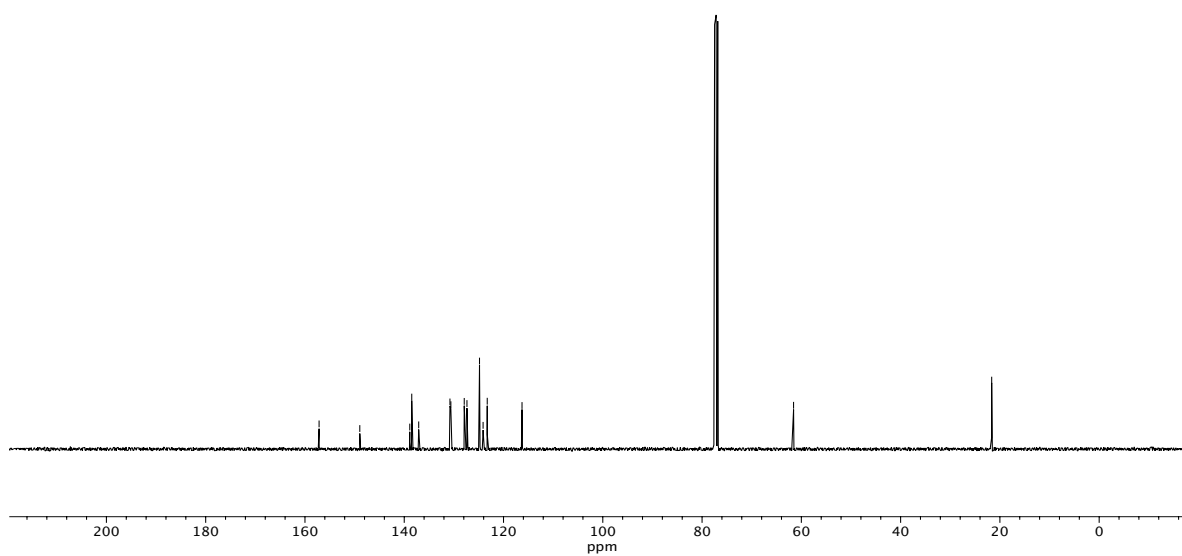

<sup>13</sup>C NMR (100 MHz, CDCl<sub>3</sub>) of compound **7k**.

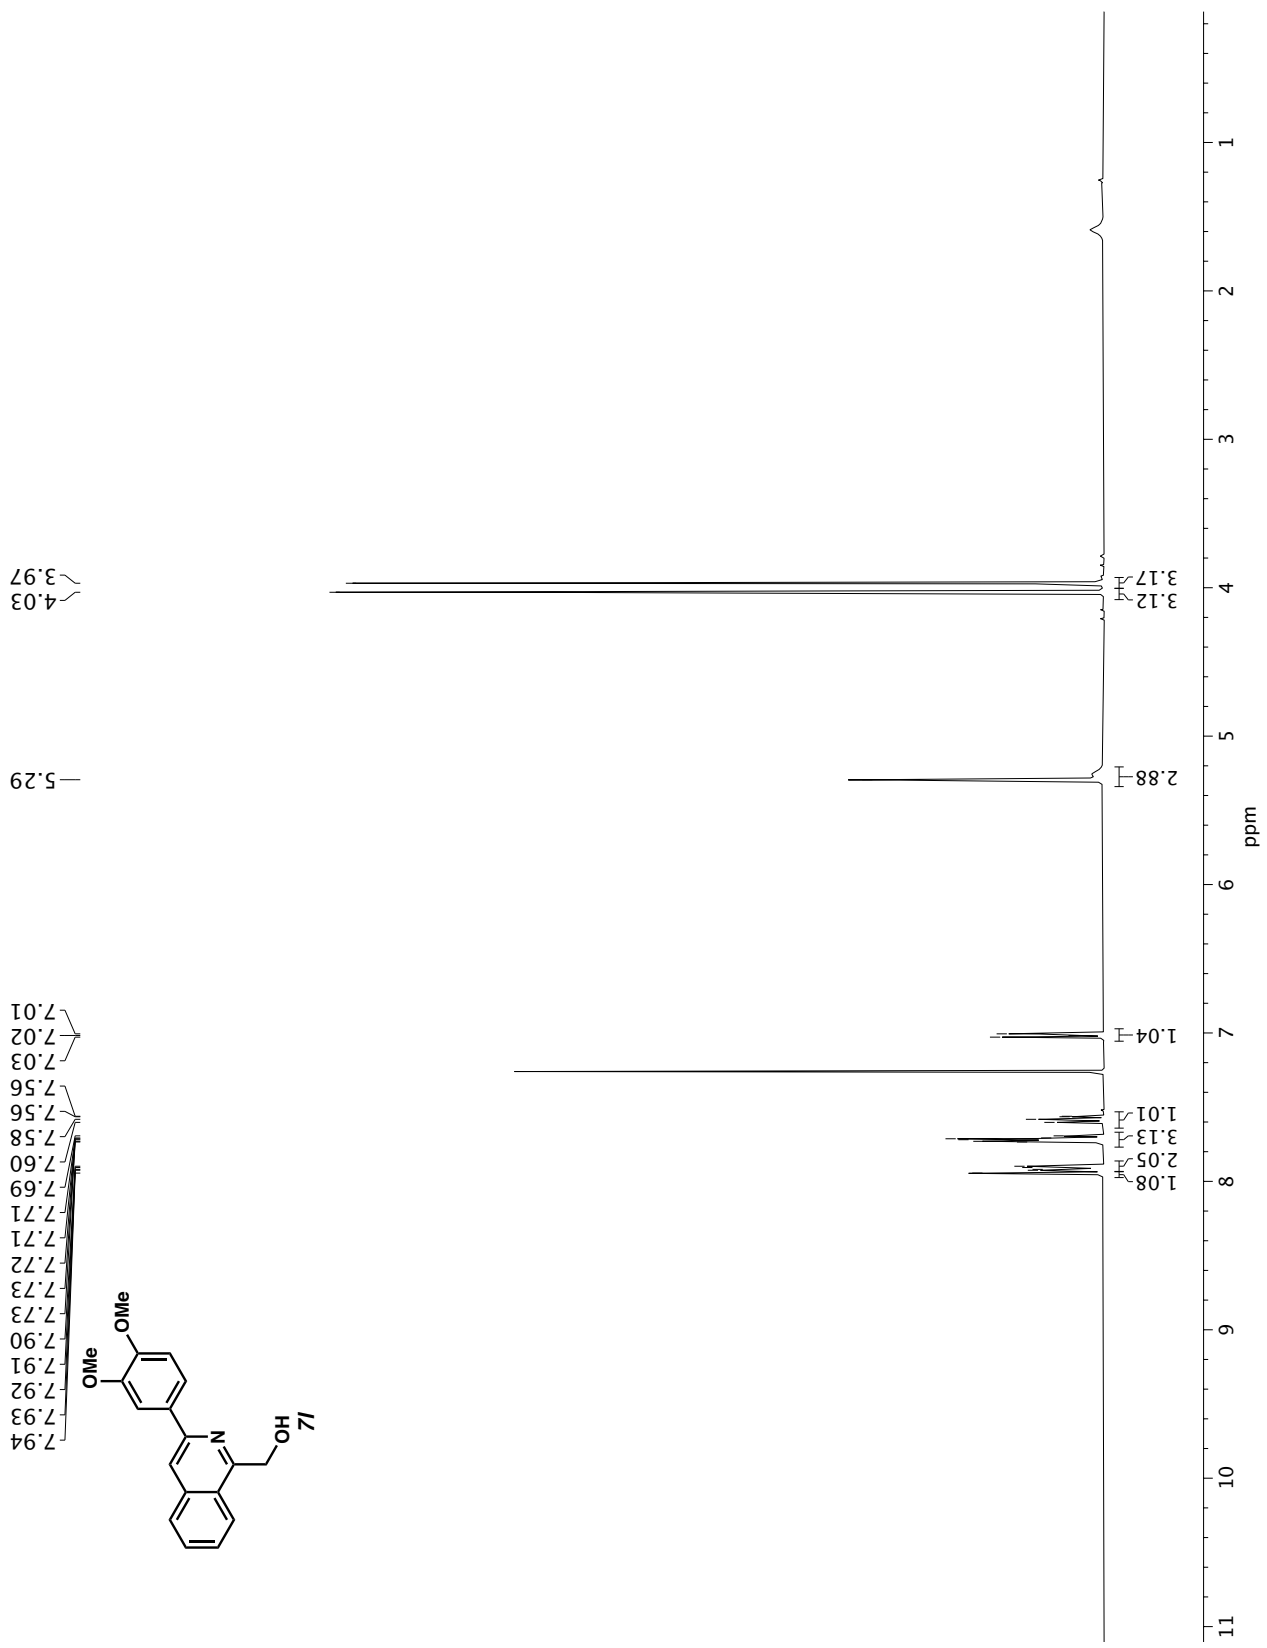

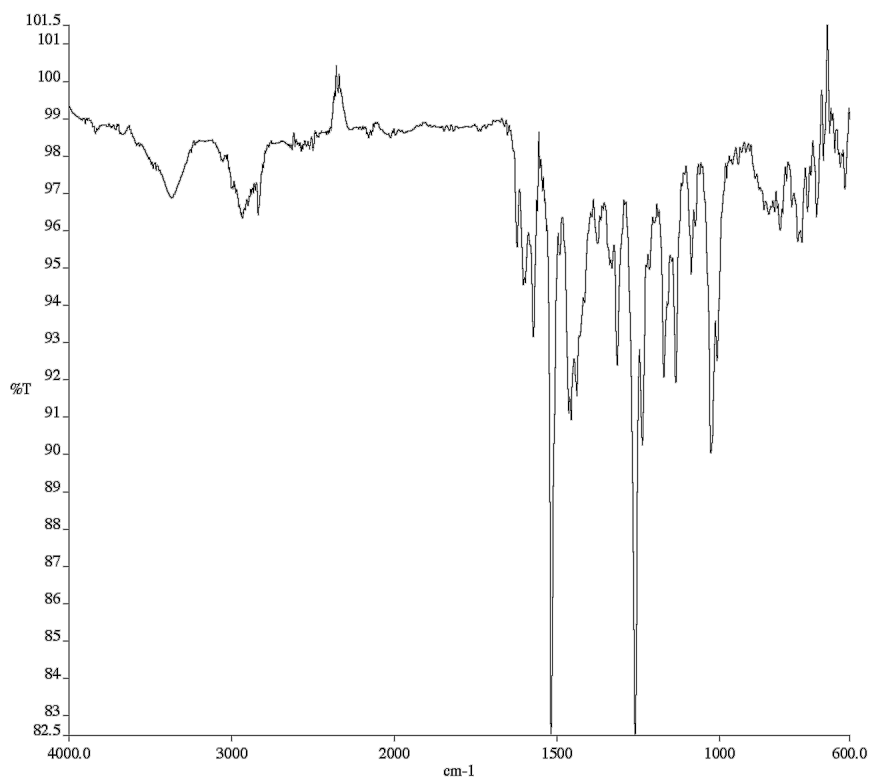

Infrared spectrum (Thin Film, NaCl) of compound 7I.

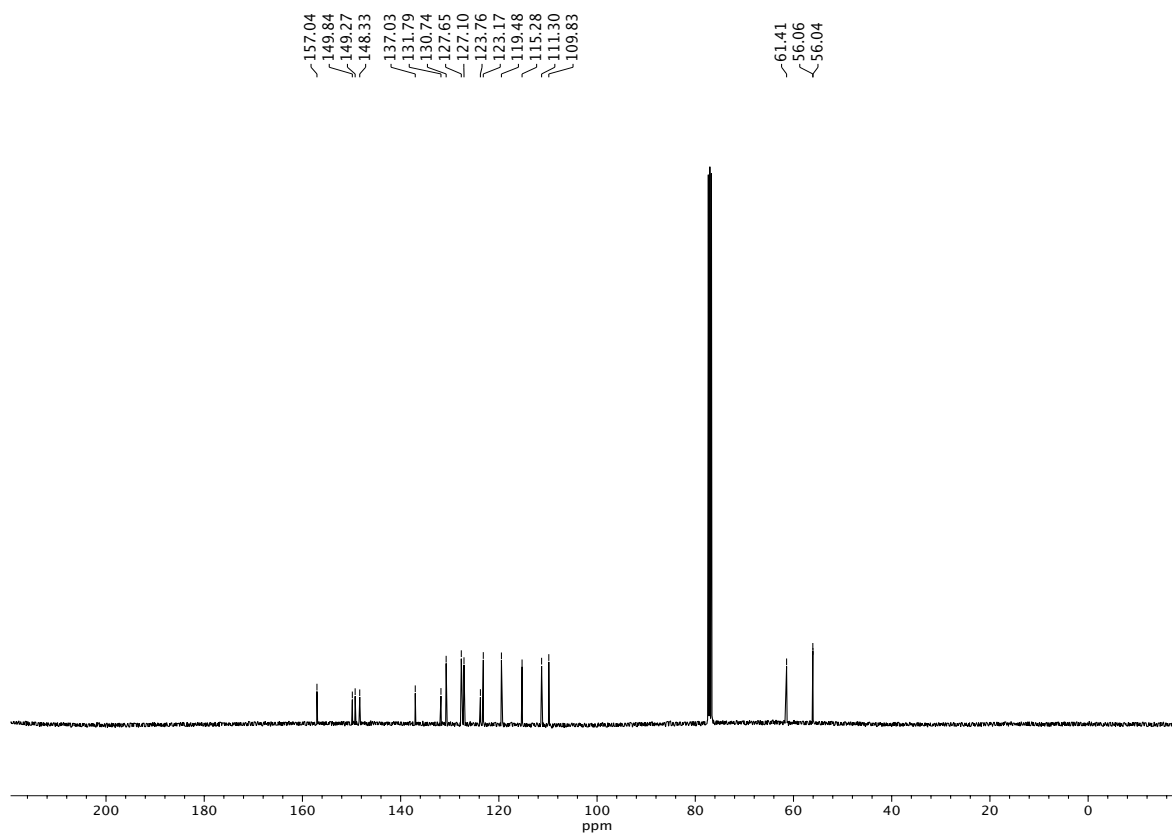

<sup>13</sup>C NMR (100 MHz, CDCl<sub>3</sub>) of compound 7I.

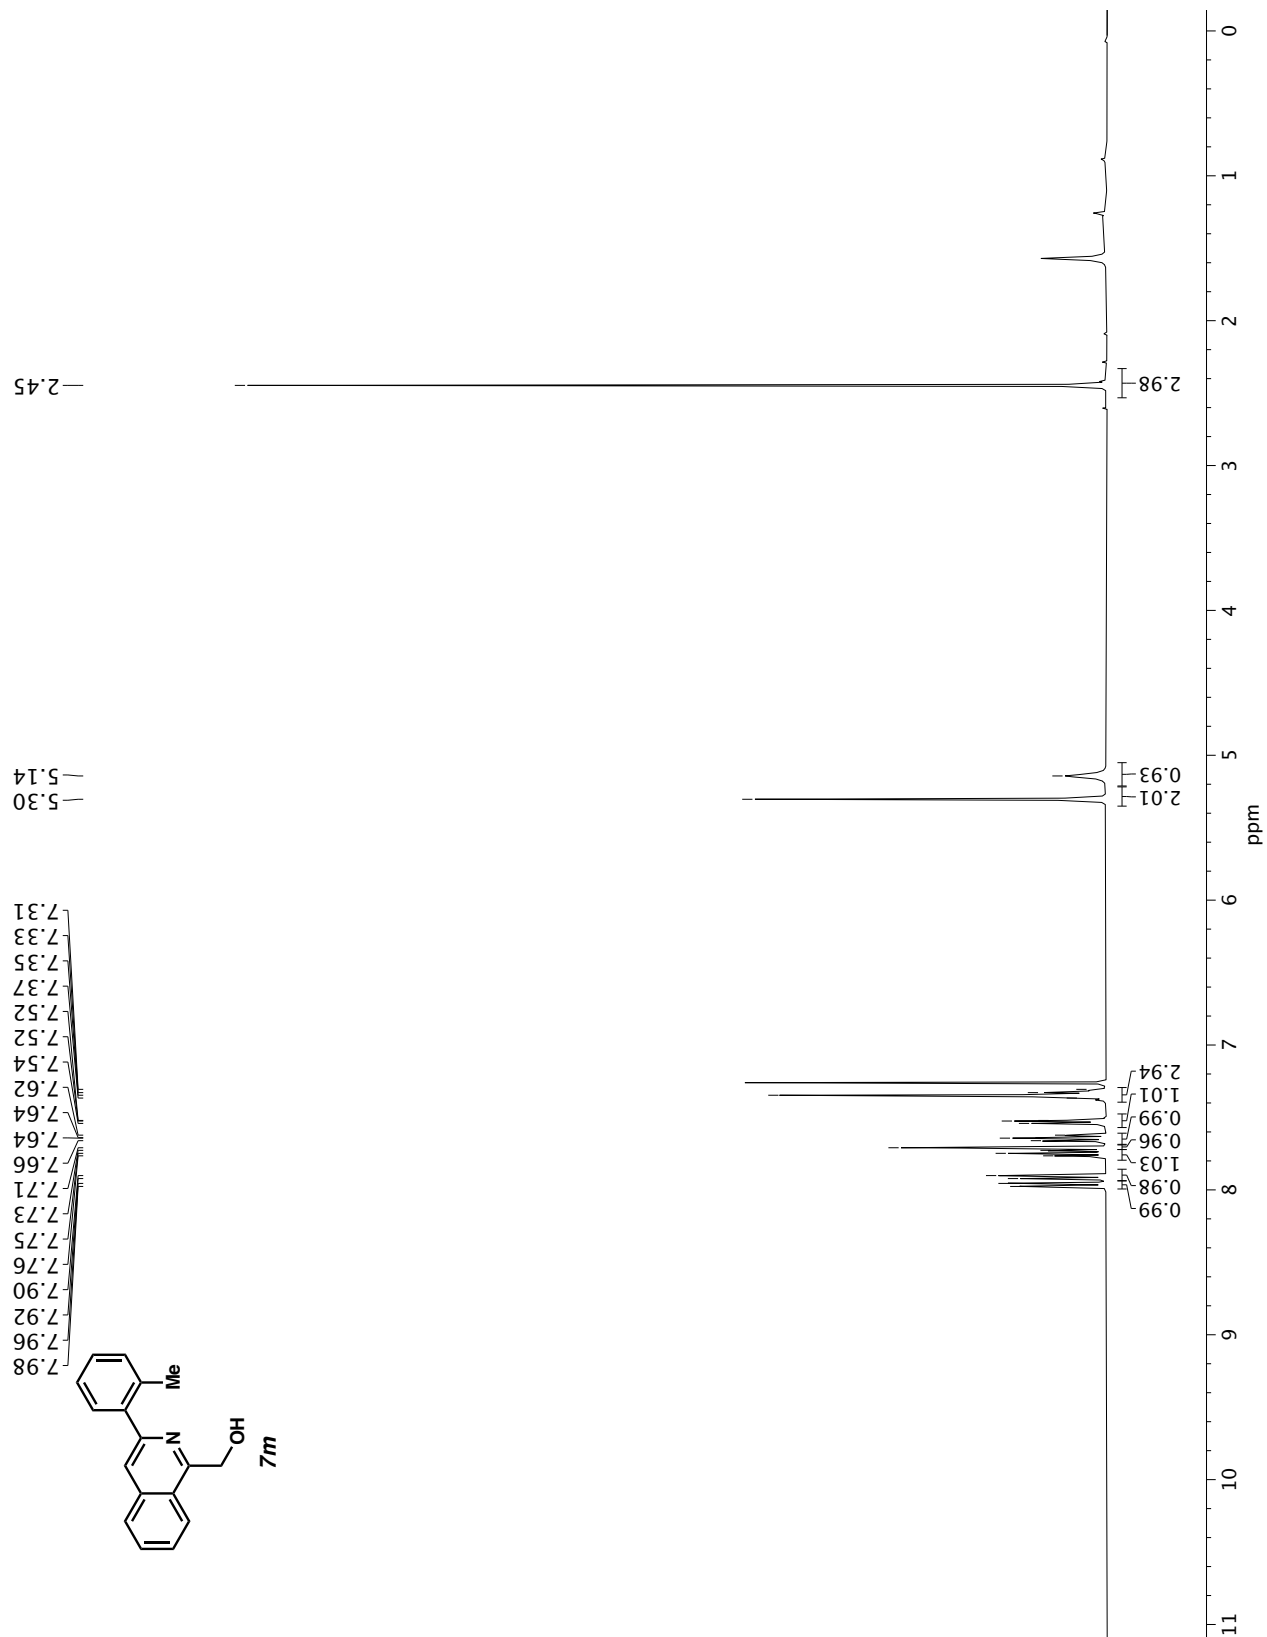

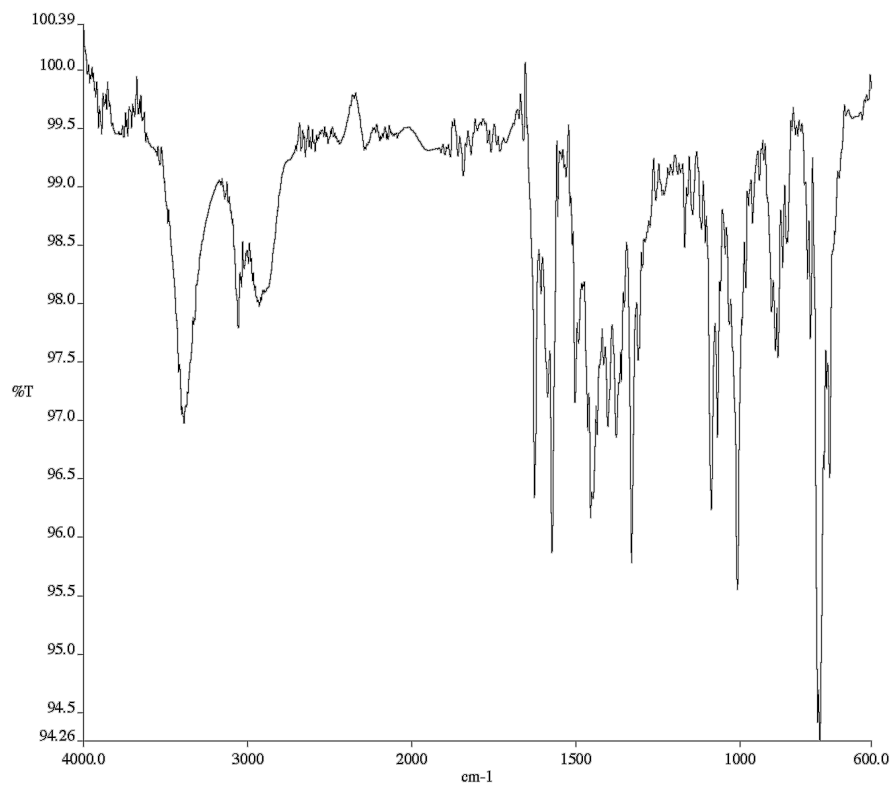

Infrared spectrum (Thin Film, NaCl) of compound **7m**.

— 156.75  
 — 151.35  
 — 140.08  
 — 136.71  
 — 136.47  
 — 131.01  
 — 130.80  
 — 130.23  
 — 128.44  
 — 127.77  
 — 127.59  
 — 126.08  
 — 123.68  
 — 123.28  
 — 120.04  
 — 61.58  
 — 20.89

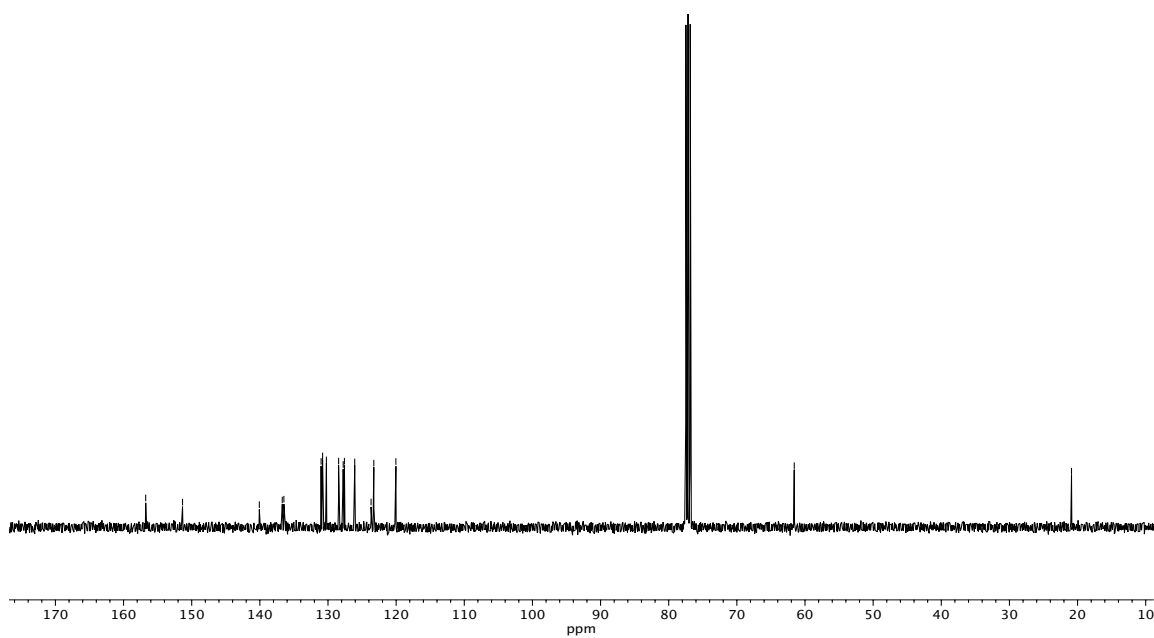

$^{13}\text{C}$  NMR (100 MHz,  $\text{CDCl}_3$ ) of compound **7m**.

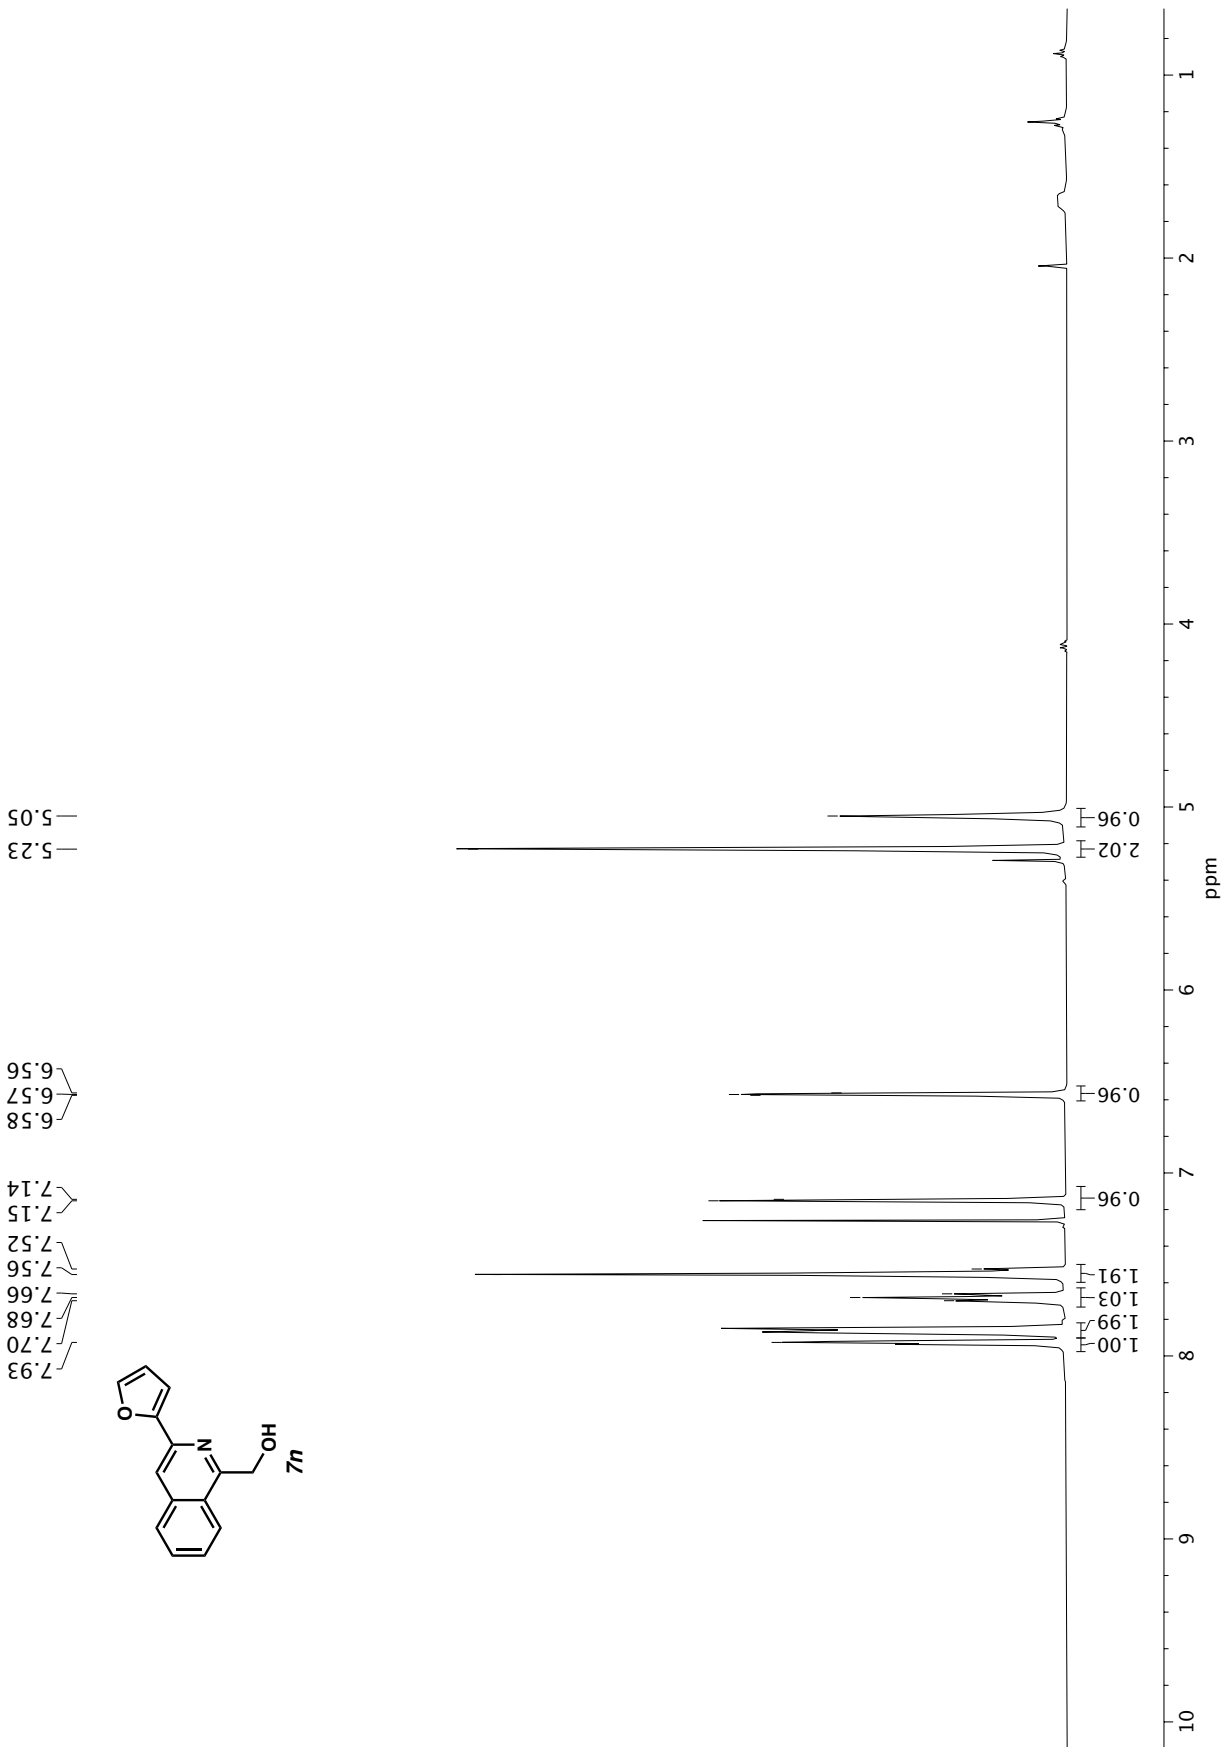

<sup>1</sup>H NMR (400 MHz, CDCl<sub>3</sub>) of compound 7n.

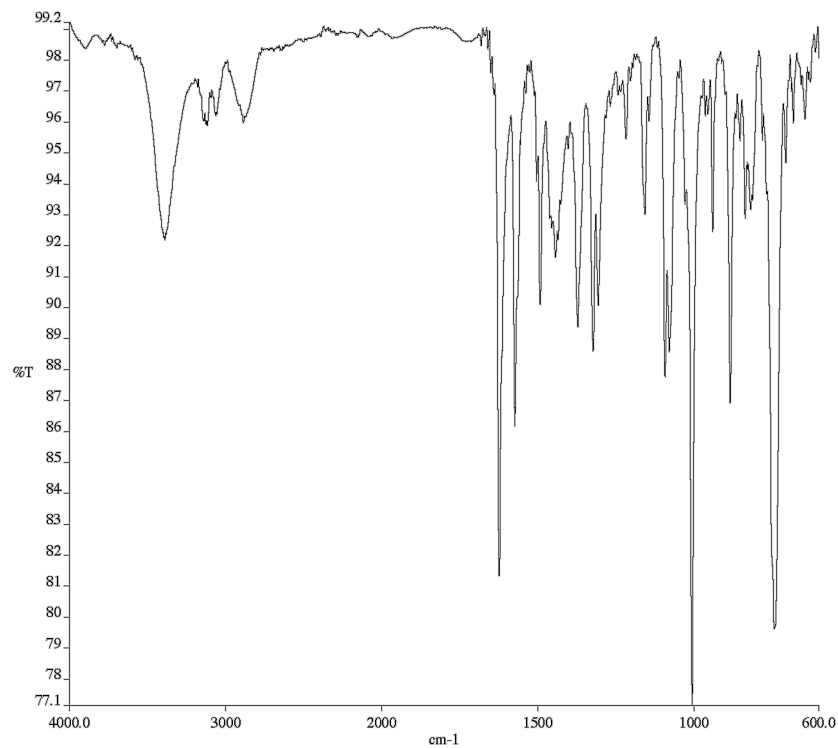

Infrared spectrum (Thin Film, NaCl) of compound **7n**.

— 157.53  
 — 153.73  
 / 143.14  
 / 140.01  
 / 136.63  
 / 130.88  
 / 127.79  
 / 127.16  
 / 123.97  
 / 123.28  
 / 113.56  
 / 112.13  
 / 108.58  
 — 61.29

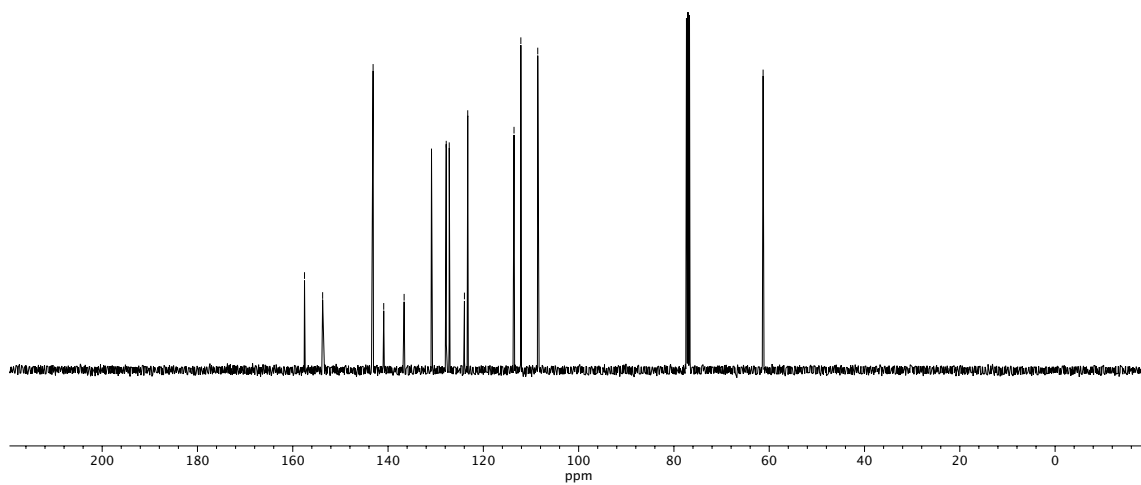

<sup>13</sup>C NMR (100 MHz, CDCl<sub>3</sub>) of compound **7n**.

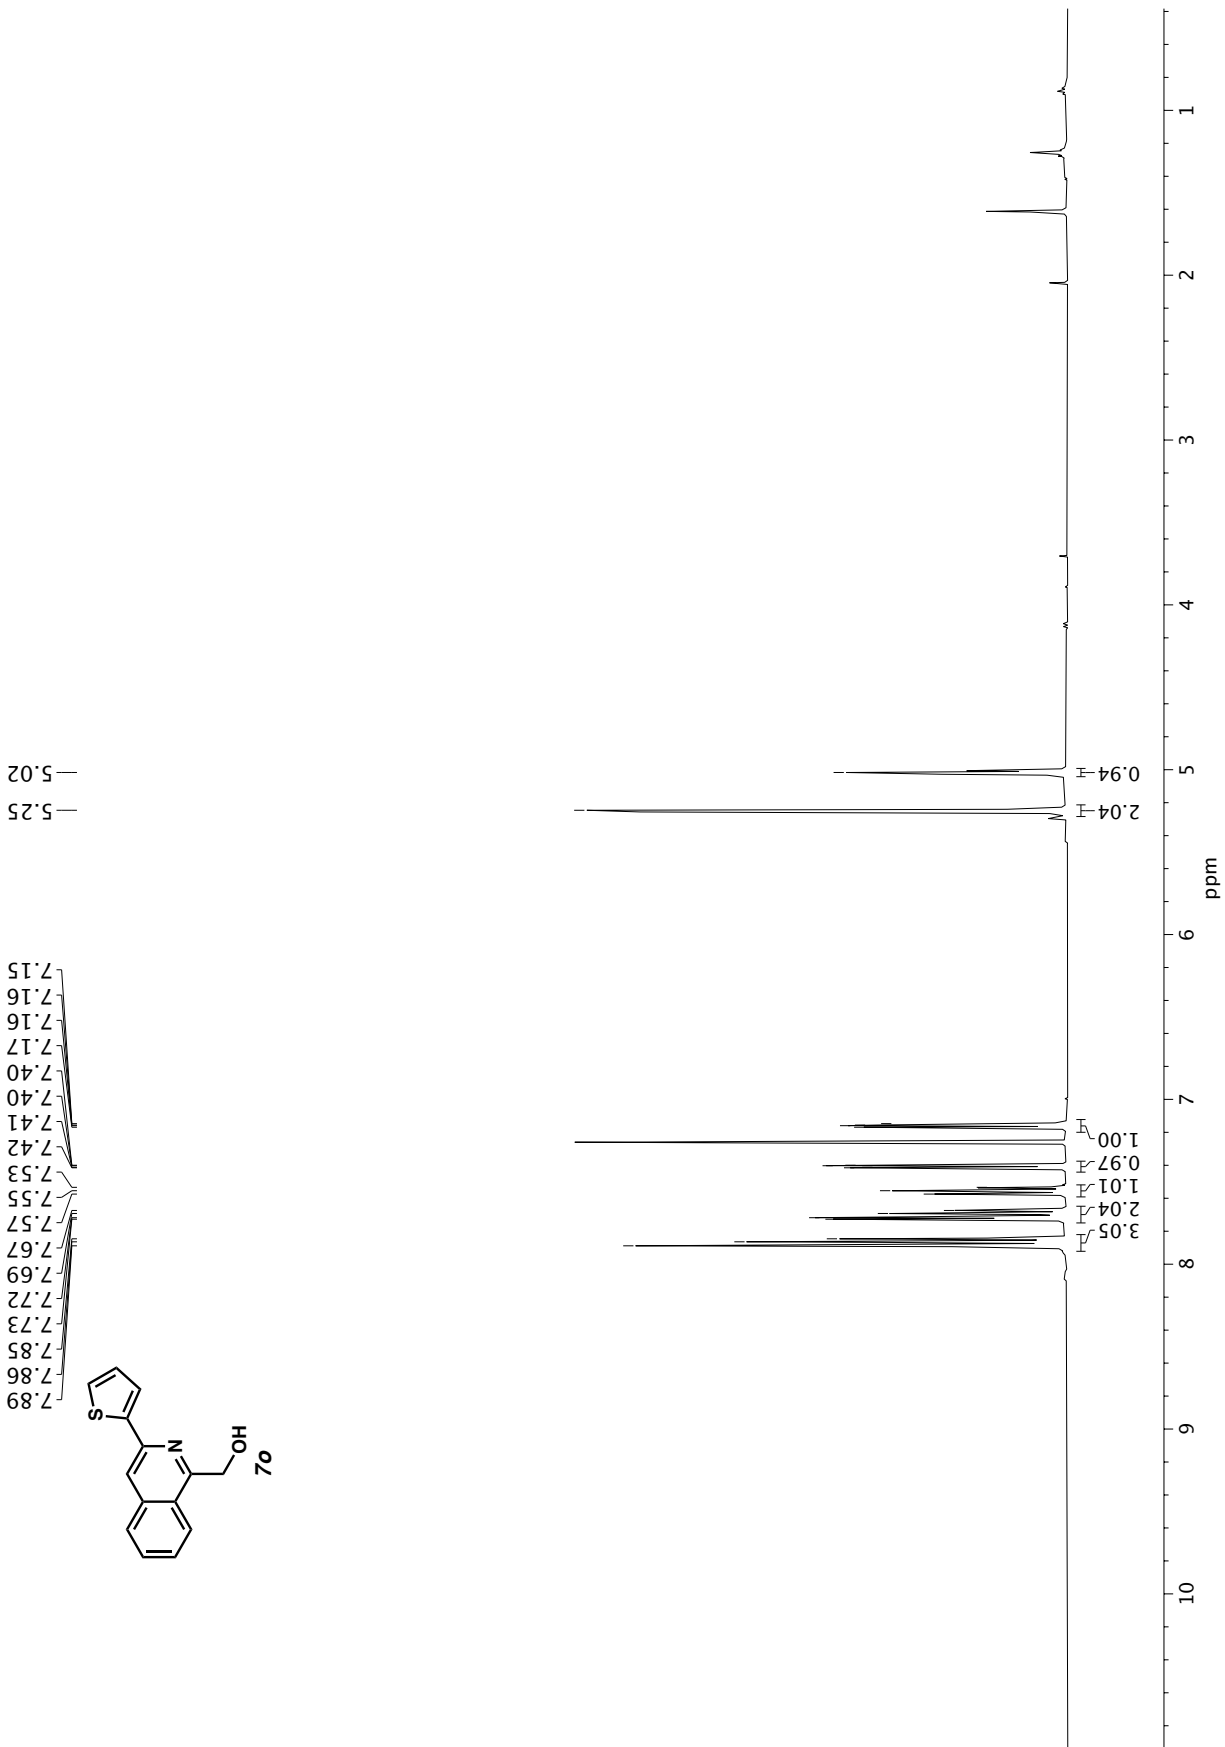



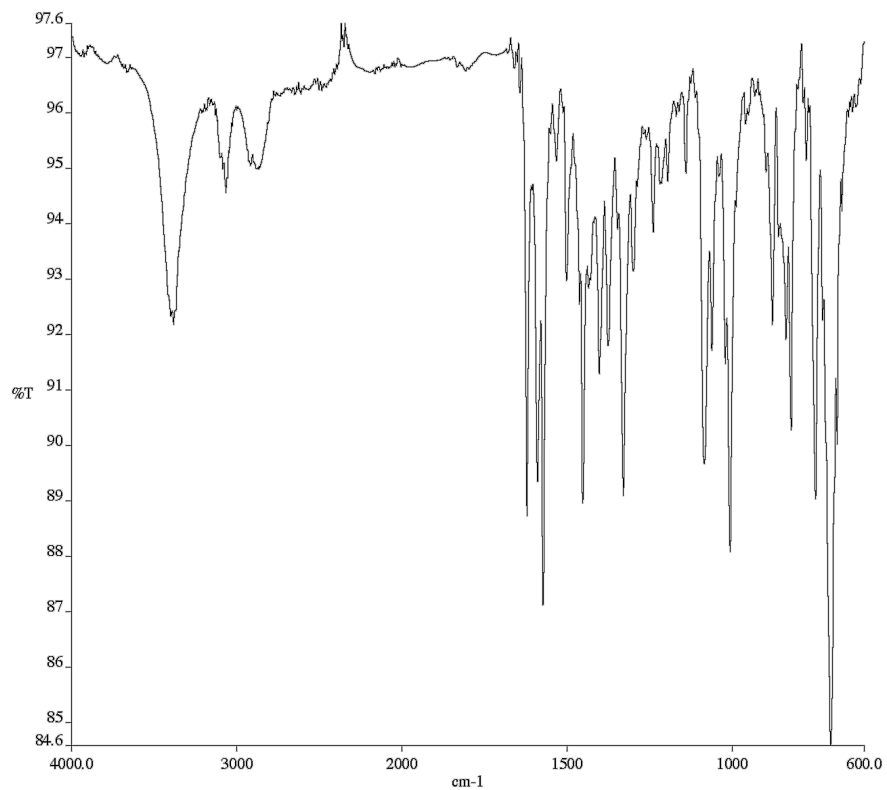

Infrared spectrum (Thin Film, NaCl) of compound **7o**.

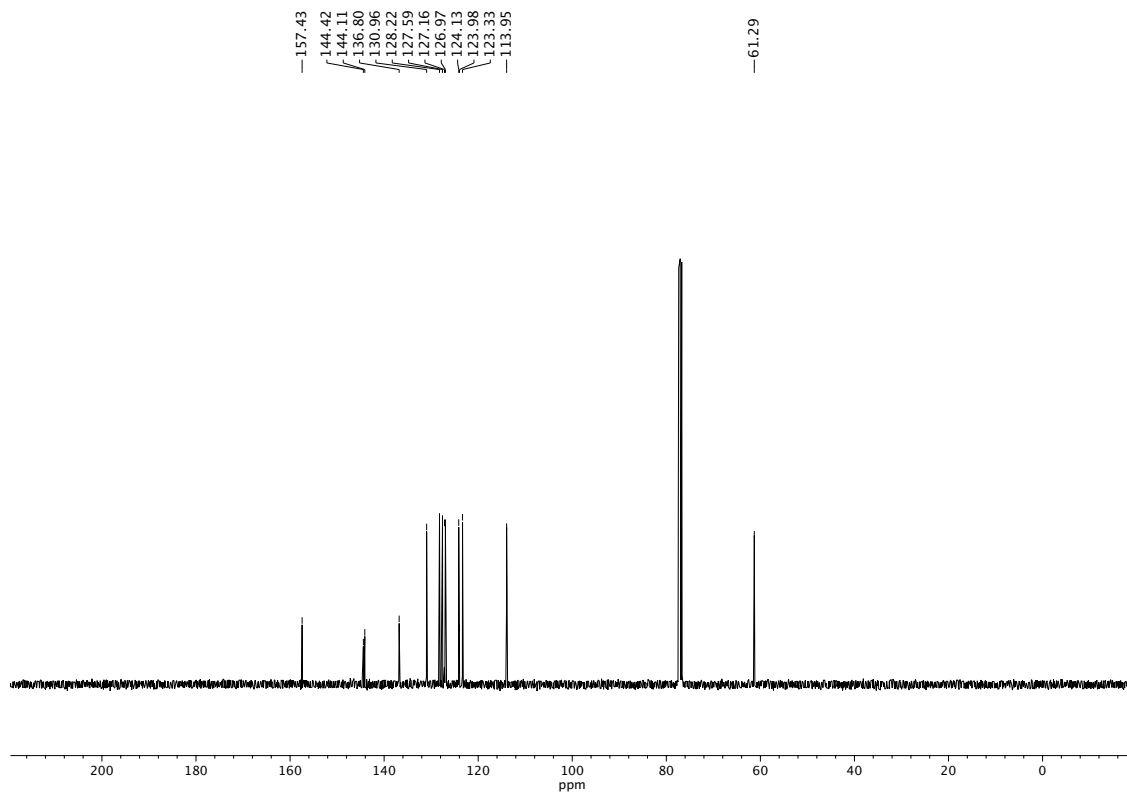

<sup>13</sup>C NMR (100 MHz, CDCl<sub>3</sub>) of compound **7o**.



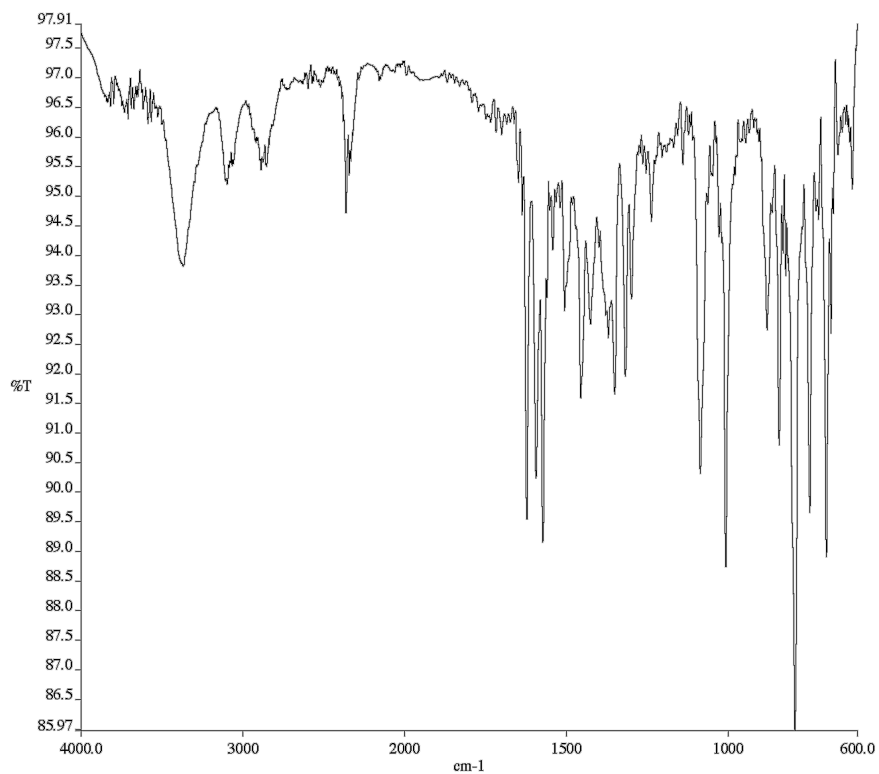

Infrared spectrum (Thin Film, NaCl) of compound **7p**.

— 157.44 — 145.03 — 141.67 — 137.04 — 130.94 — 127.76 — 127.29 — 126.62 — 126.02 — 124.05 — 123.39 — 123.36 — 115.61 — 61.47

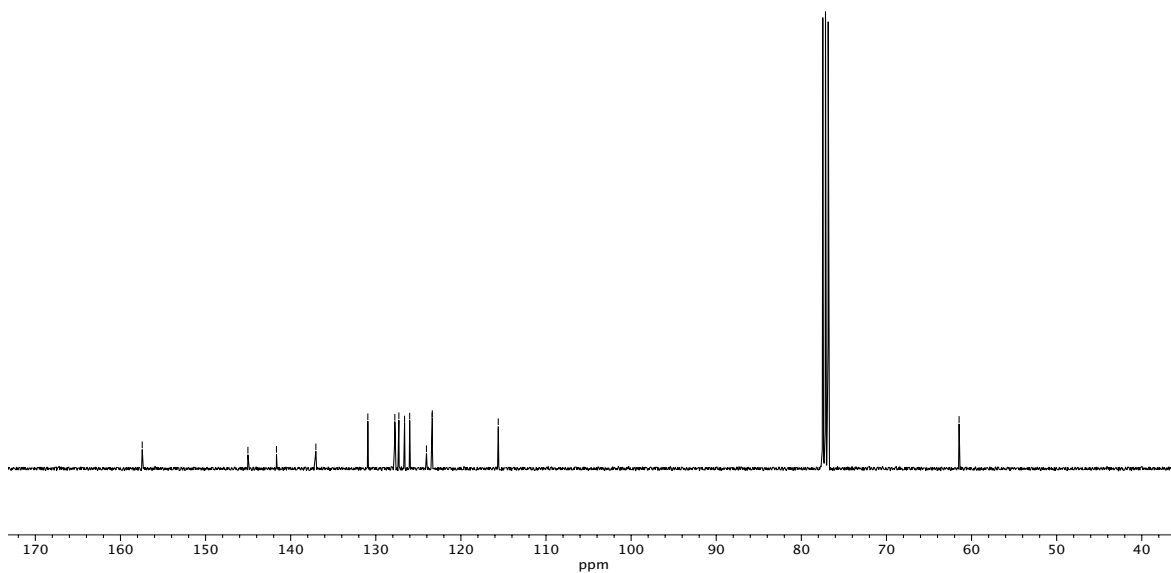

$^{13}\text{C}$  NMR (100 MHz,  $\text{CDCl}_3$ ) of compound **7p**.

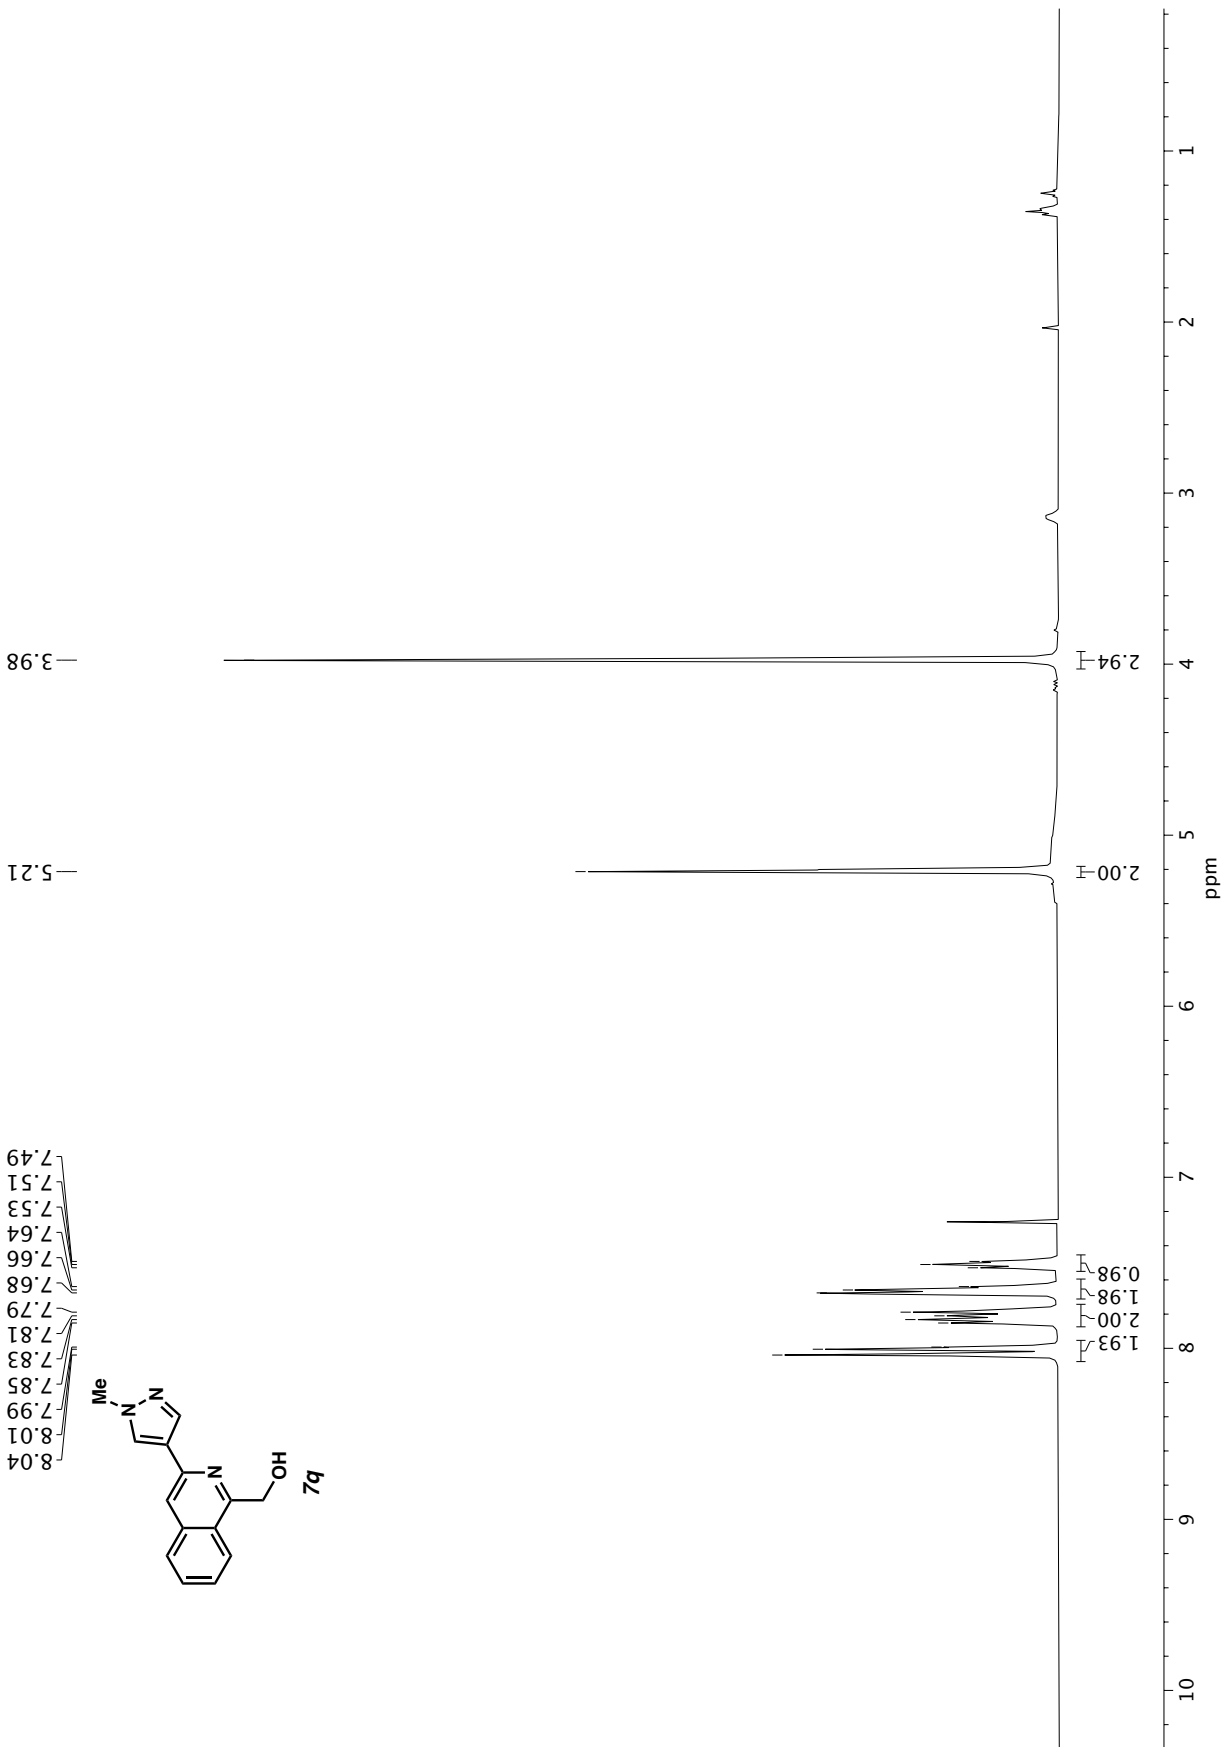

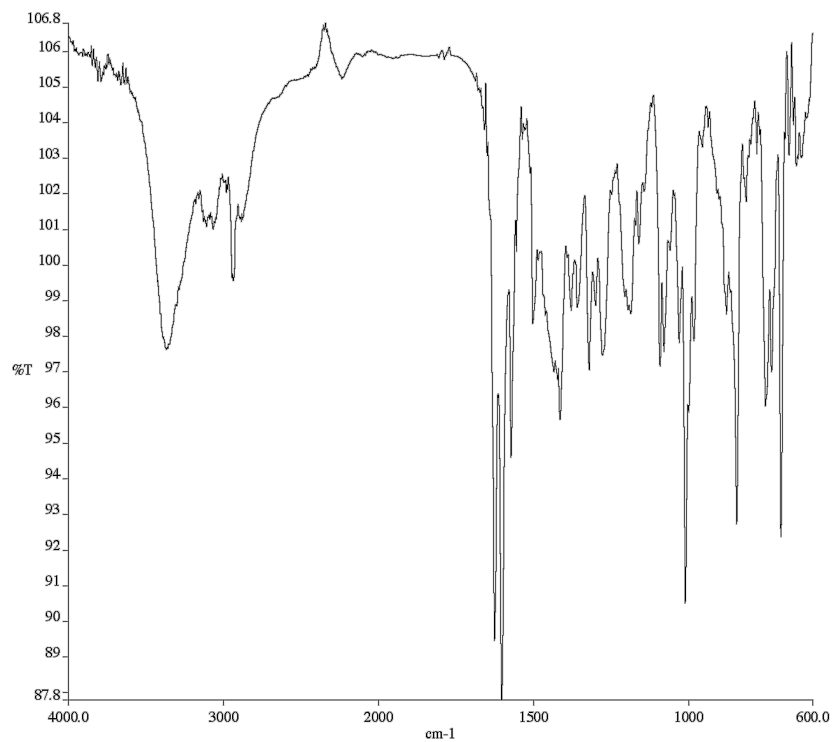

Infrared spectrum (Thin Film, NaCl) of compound **7q**.

— 157.31  
 / 143.18  
 / 137.29  
 / 136.91  
 / 130.76  
 / 128.75  
 / 127.19  
 / 126.65  
 / 123.52  
 / 123.23  
 — 114.06  
 — 61.23  
 — 39.24

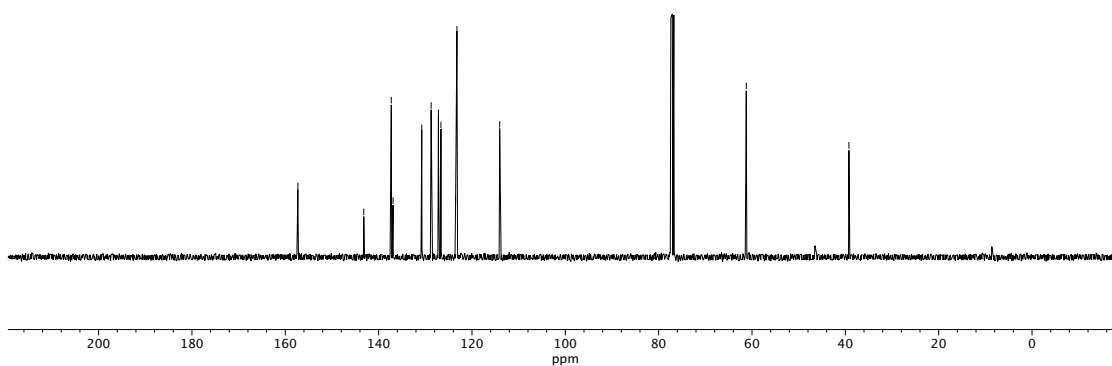

$^{13}\text{C}$  NMR (100 MHz,  $\text{CDCl}_3$ ) of compound **7q**.

8.74  
8.73  
8.72  
8.72  
8.53  
8.51  
8.01  
7.99  
7.95  
7.93  
7.88  
7.88  
7.86  
7.86  
7.84  
7.75  
7.75  
7.73  
7.73  
7.71  
7.71  
7.65  
7.64  
7.63  
7.63  
7.62  
7.34  
7.34  
7.33  
7.33  
7.32  
7.32  
7.31  
7.31  
7.31  
5.13

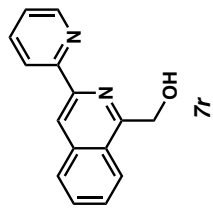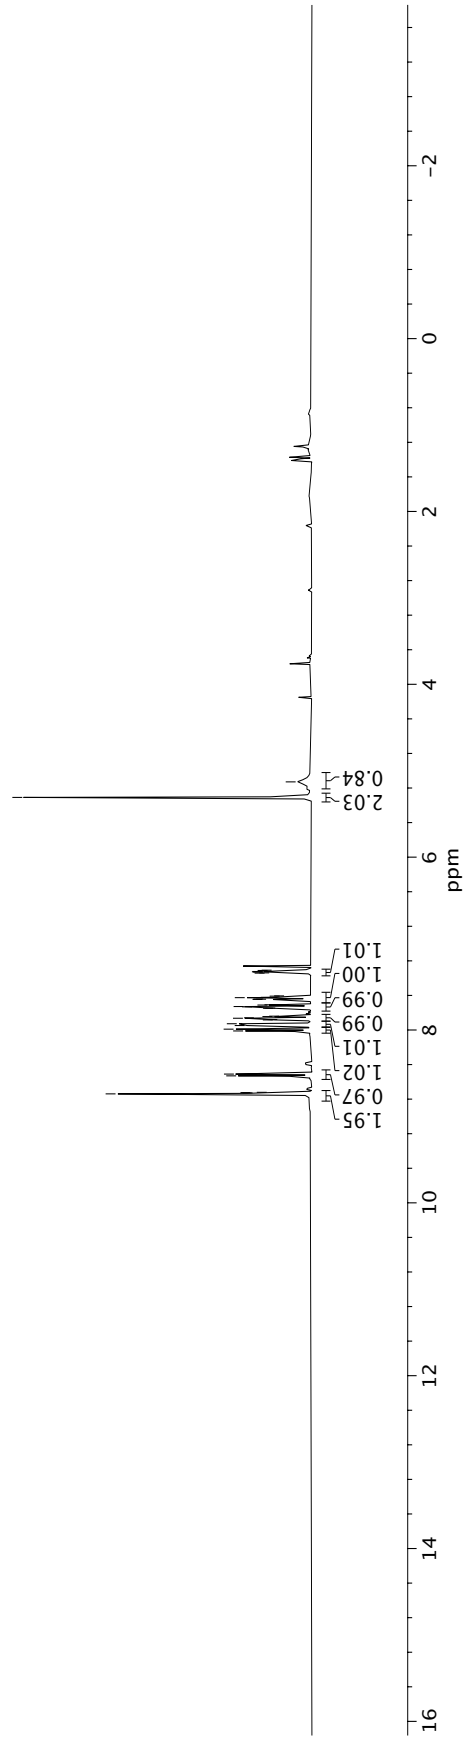

<sup>1</sup>H NMR (400 MHz, CDCl<sub>3</sub>) of compound 7r.

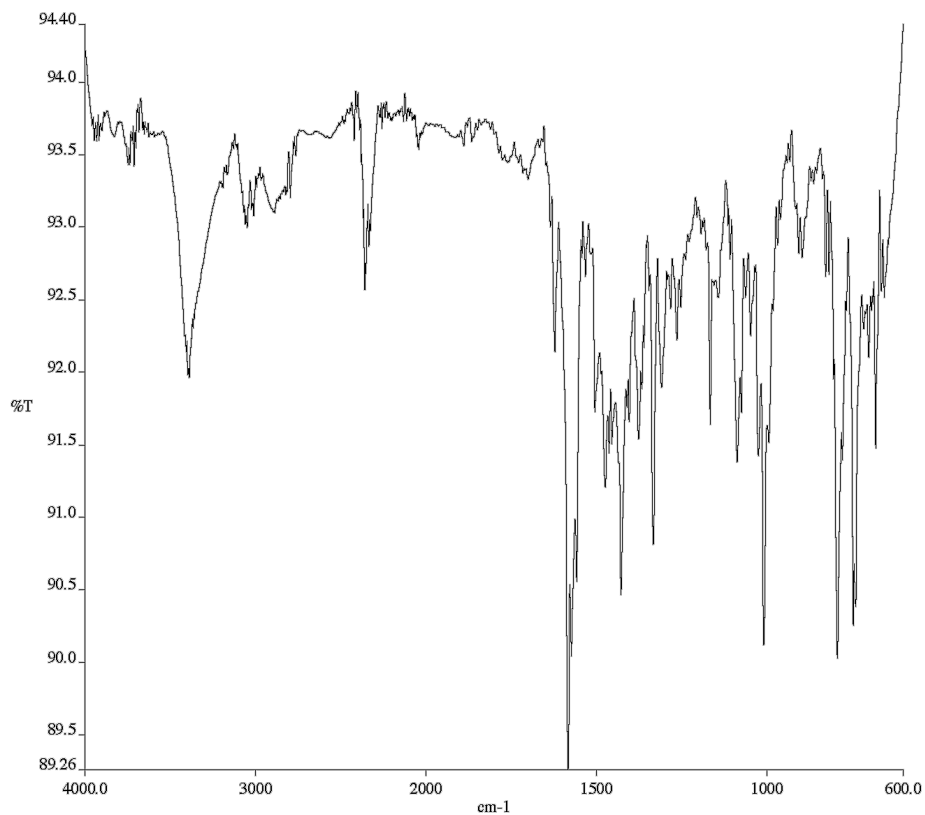

Infrared spectrum (Thin Film, NaCl) of compound **7r**.

~157.17  
 ~155.82  
 ~149.54  
 ~147.29  
 ~137.16  
 ~136.97  
 ~130.92  
 ~128.73  
 ~128.08  
 ~125.12  
 ~123.63  
 ~123.29  
 ~121.10  
 ~117.63  
 ~61.63

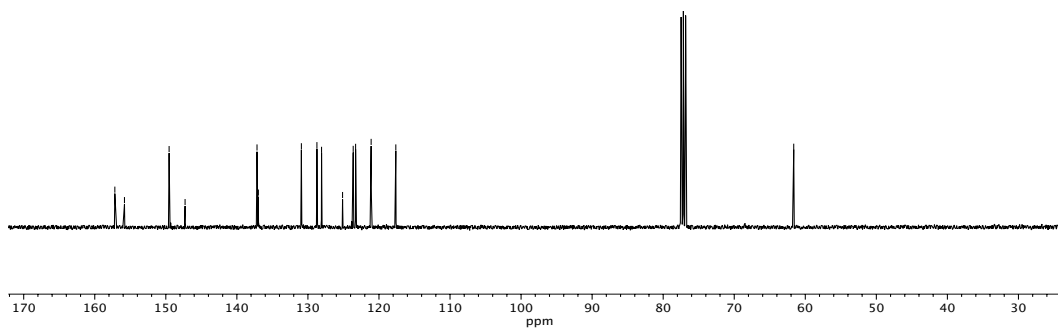

$^{13}\text{C}$  NMR (100 MHz,  $\text{CDCl}_3$ ) of compound **7r**.

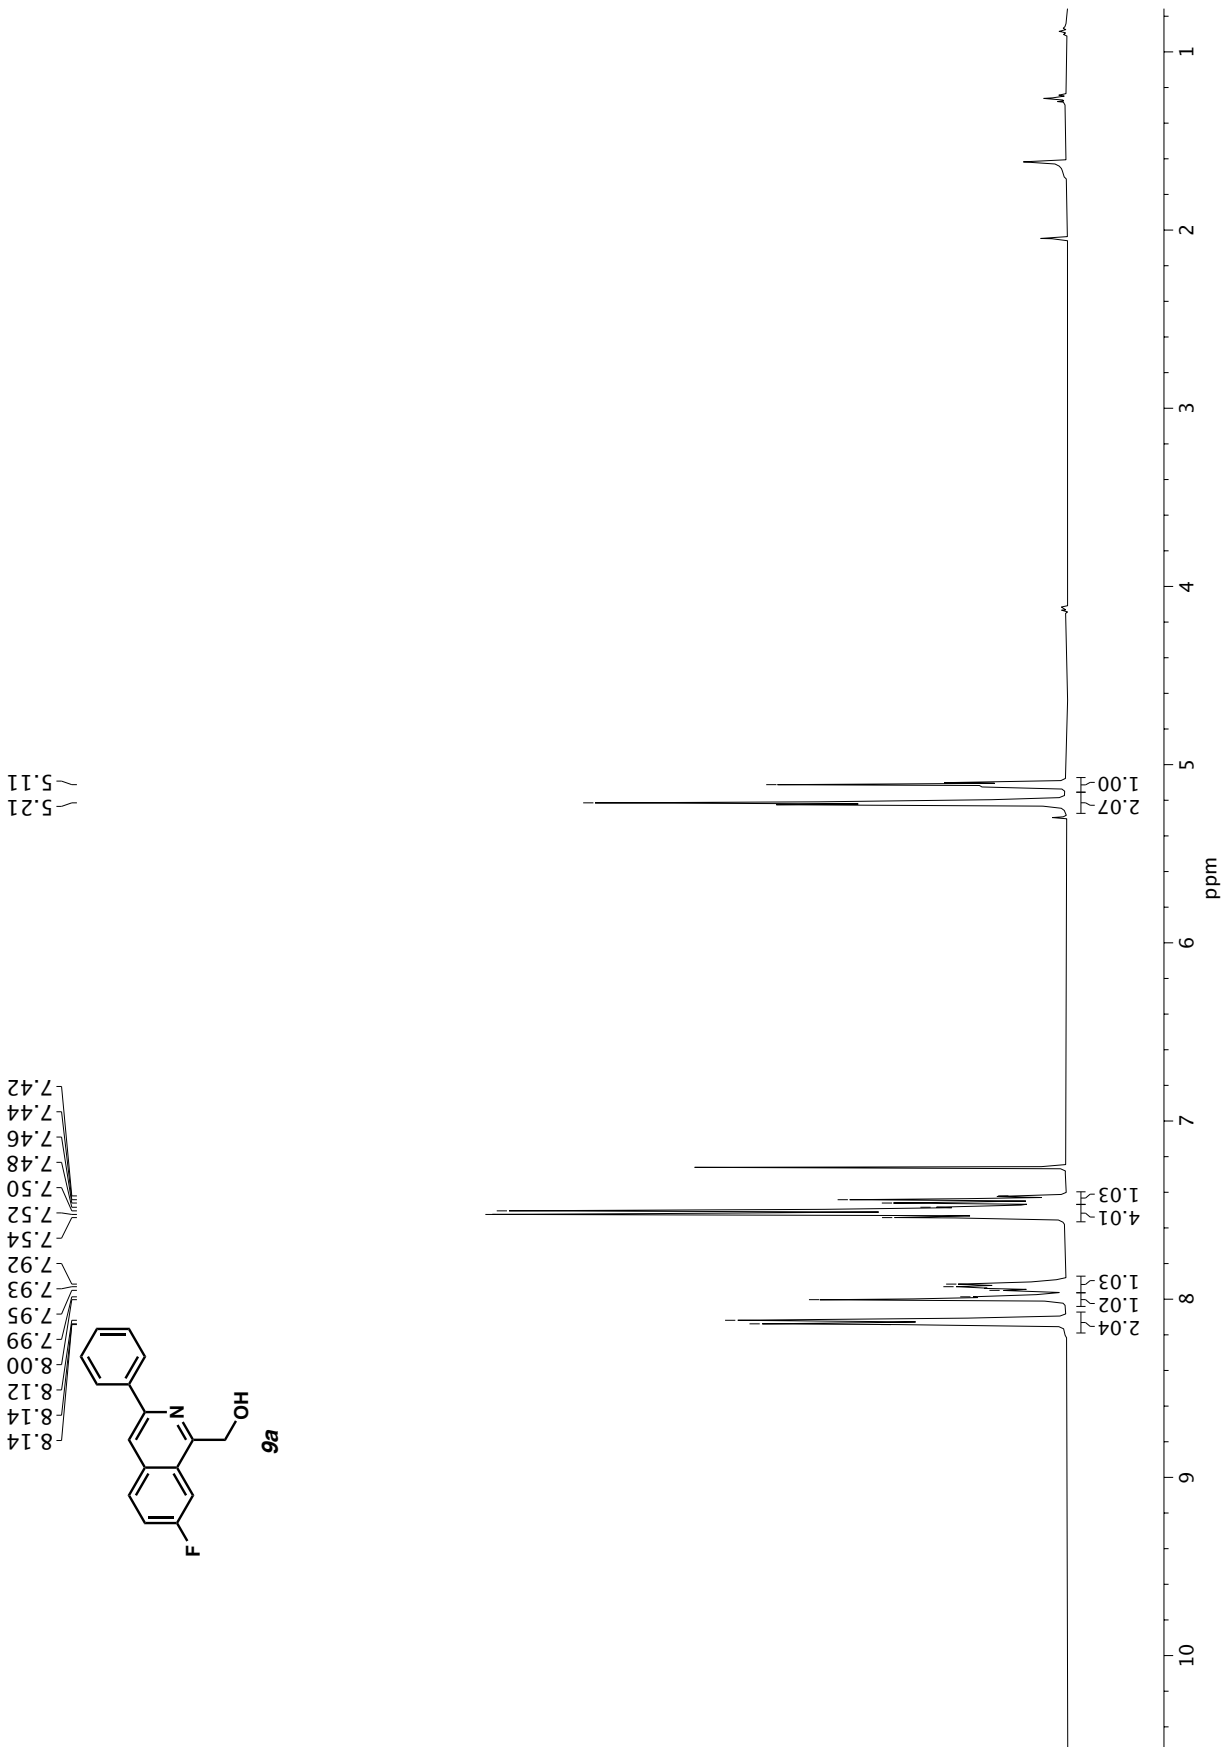



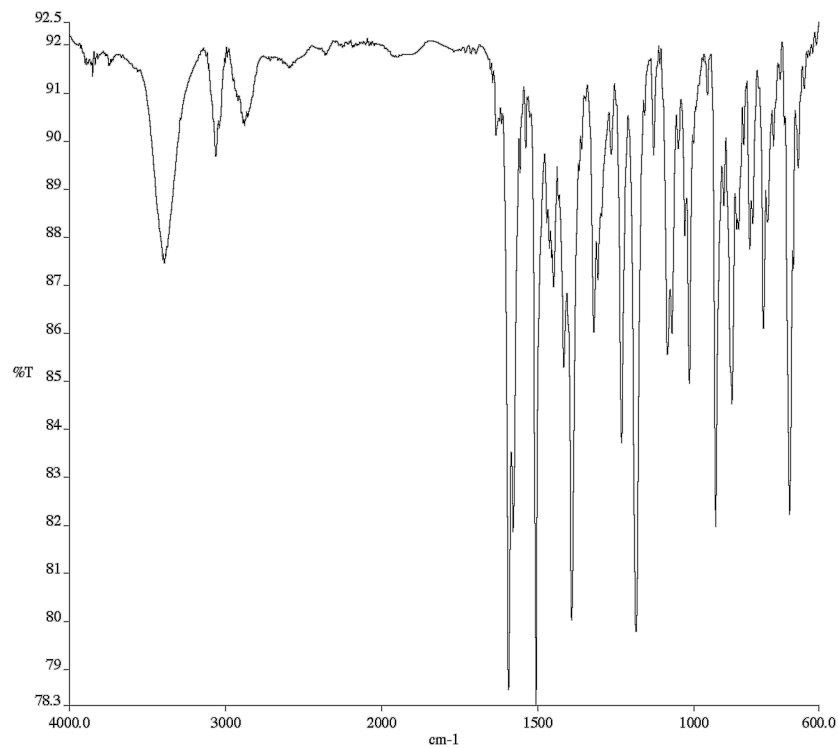

Infrared spectrum (Thin Film, NaCl) of compound **9a**.

162.22  
159.73  
156.85  
156.80

148.43

138.62  
134.08  
130.58  
130.49  
128.98  
126.84  
124.78  
124.70  
121.54  
121.29  
115.95  
115.93

107.30  
107.09

61.58

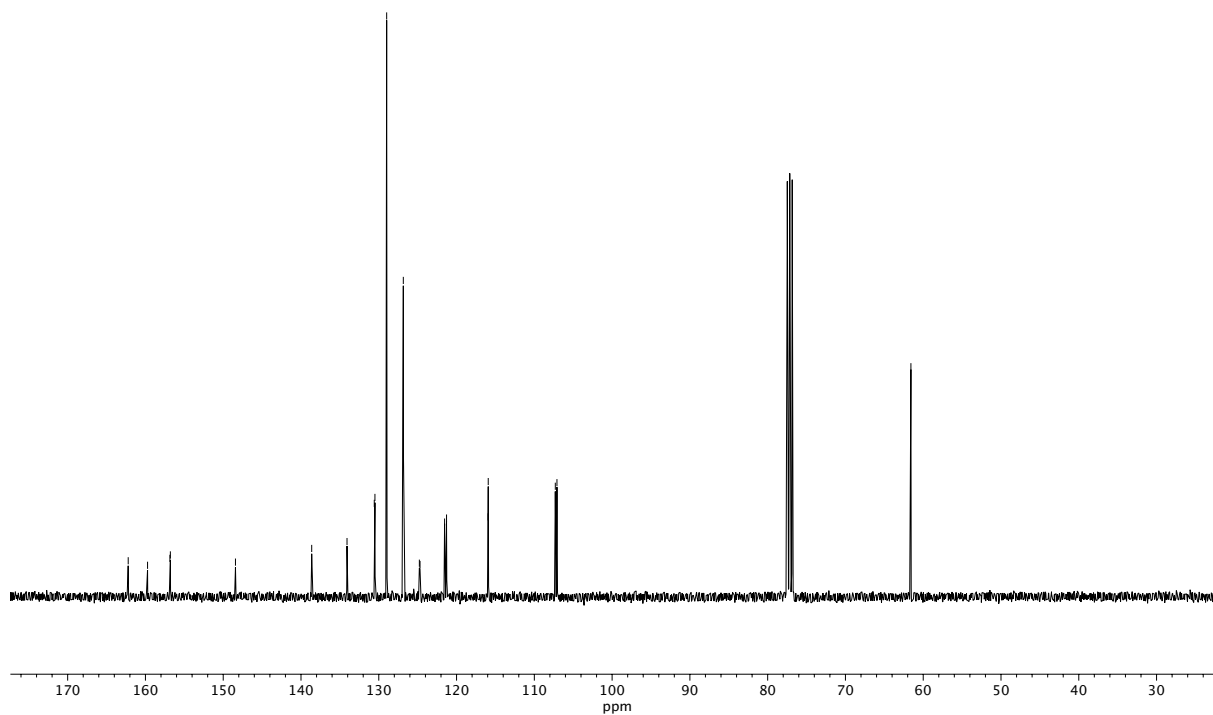

$^{13}\text{C}$  NMR (100 MHz,  $\text{CDCl}_3$ ) of compound **9a**.

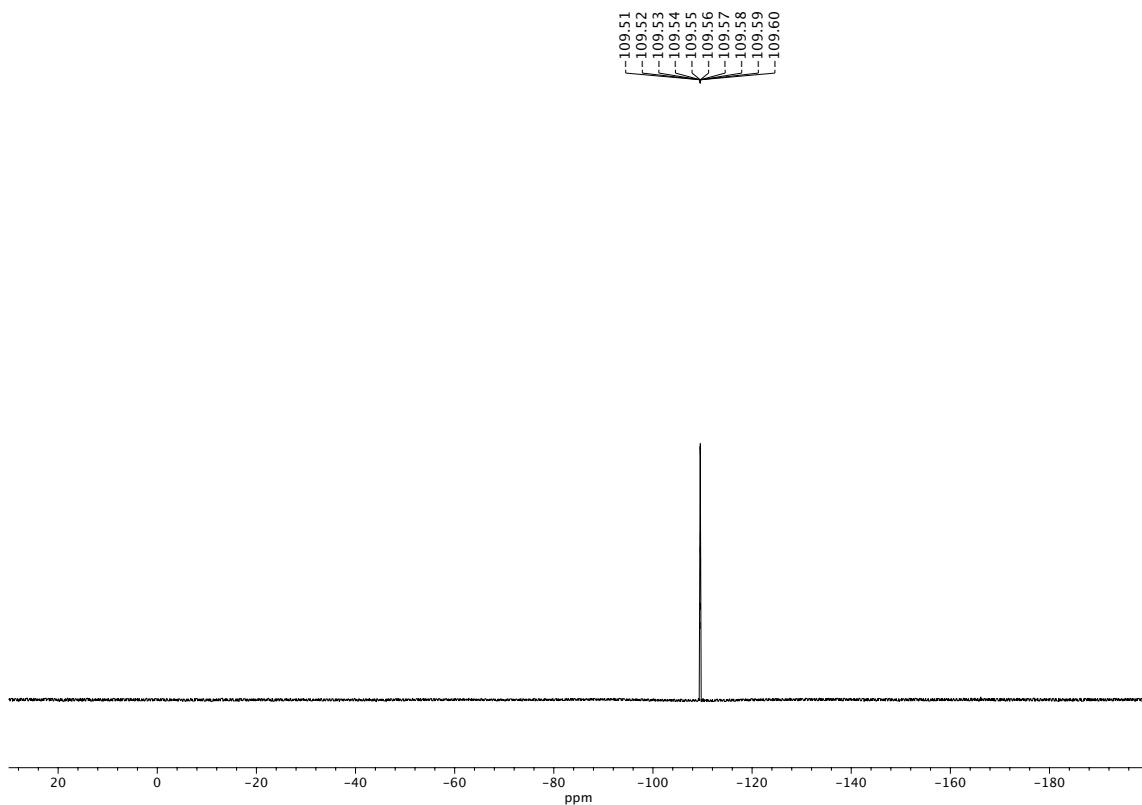

$^{19}\text{F}$  NMR (282 MHz,  $\text{CDCl}_3$ ) of **9a**.

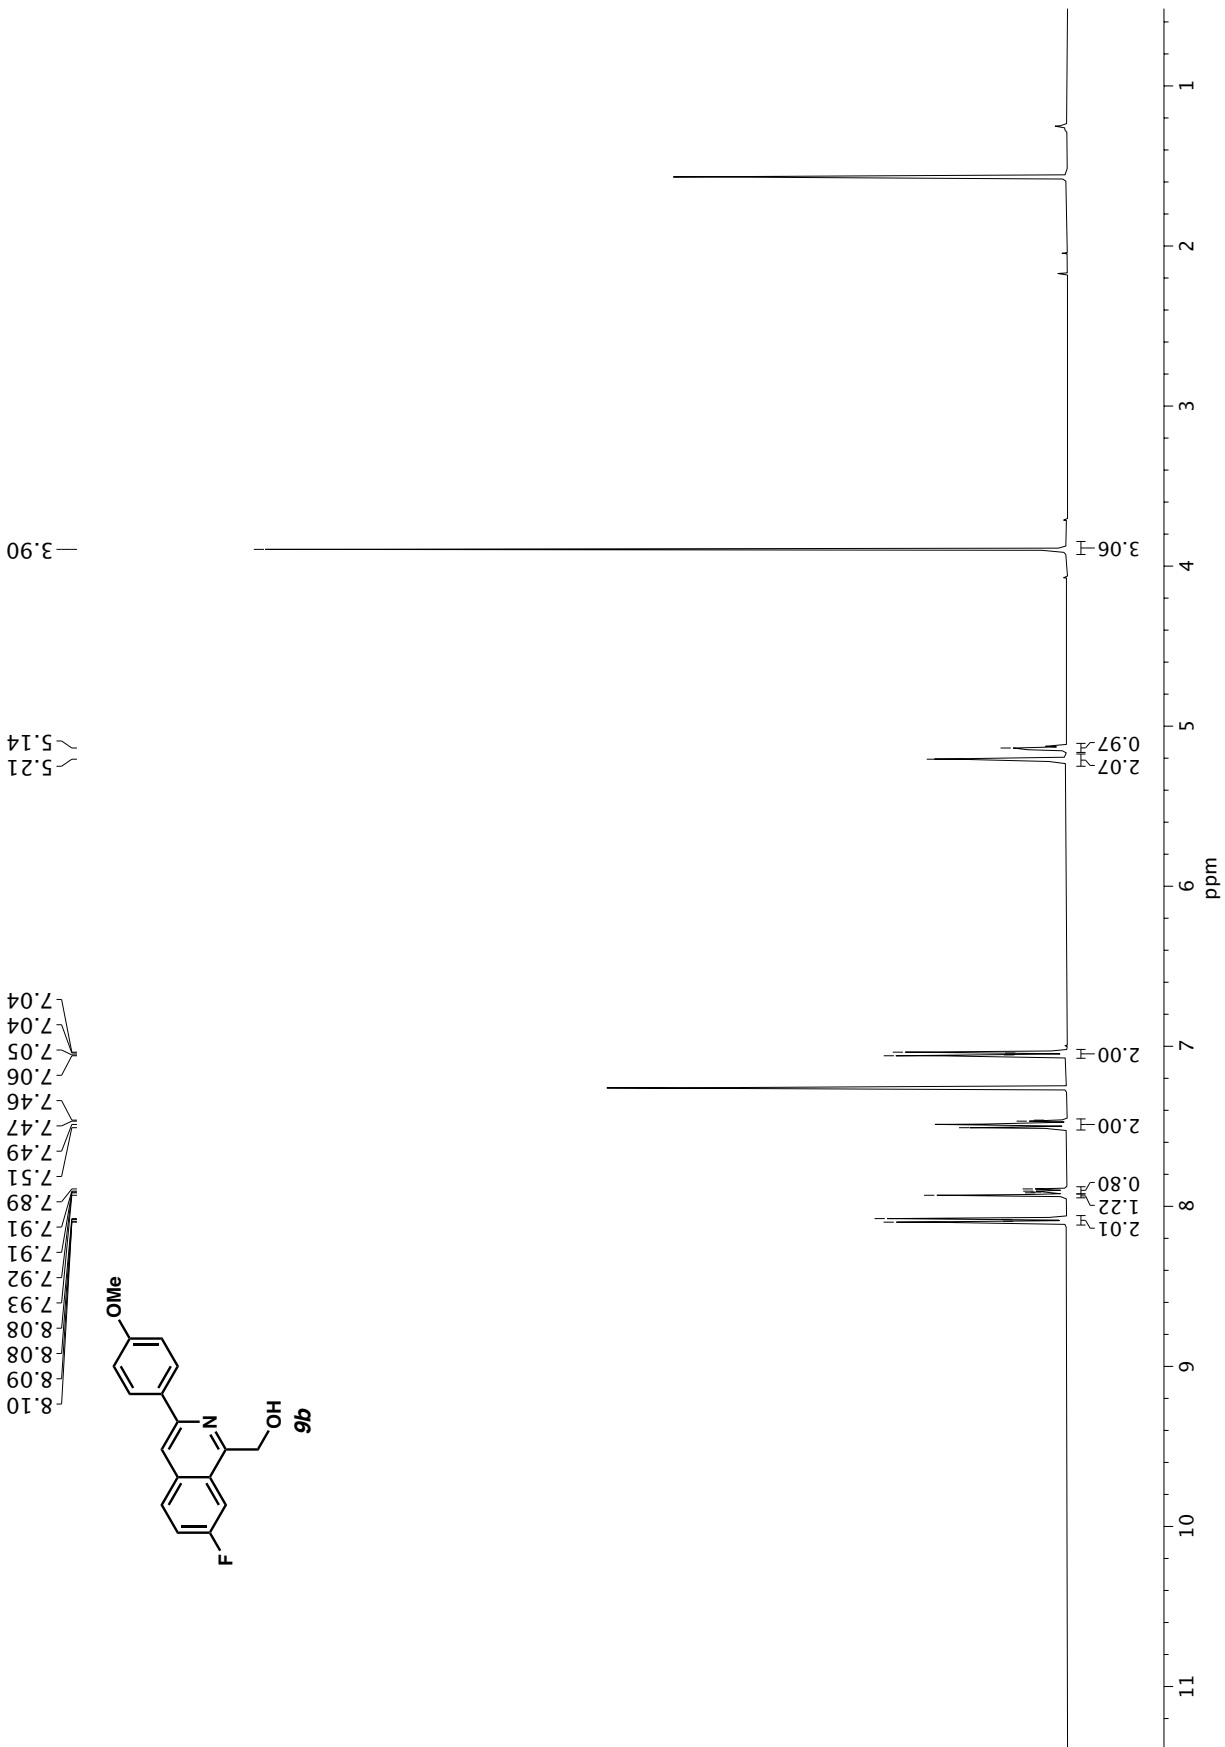

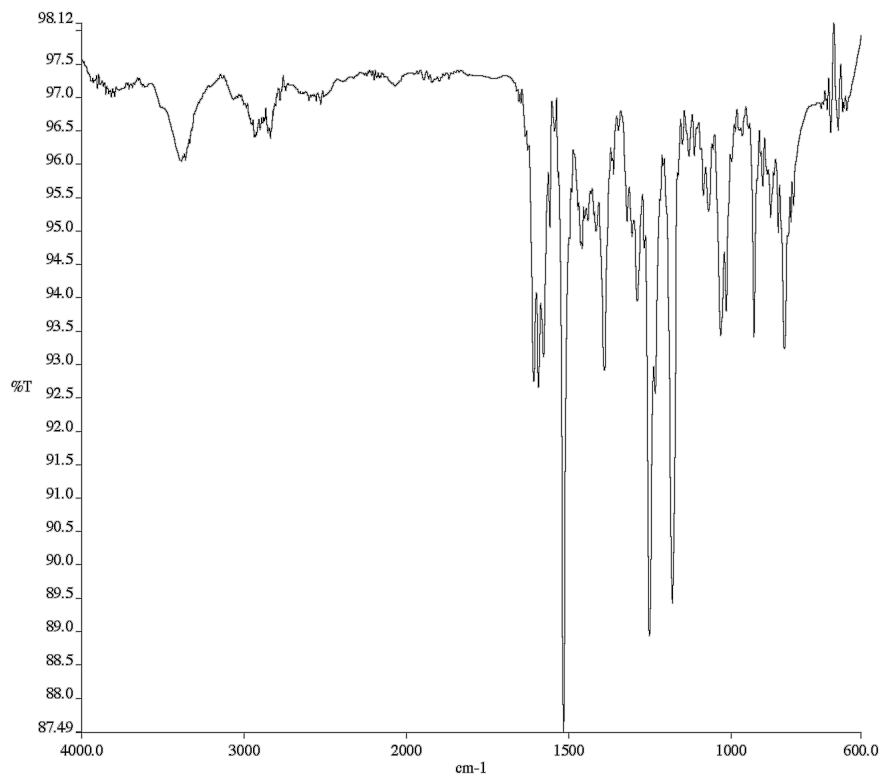

Infrared spectrum (Thin Film, NaCl) of compound **9b**.

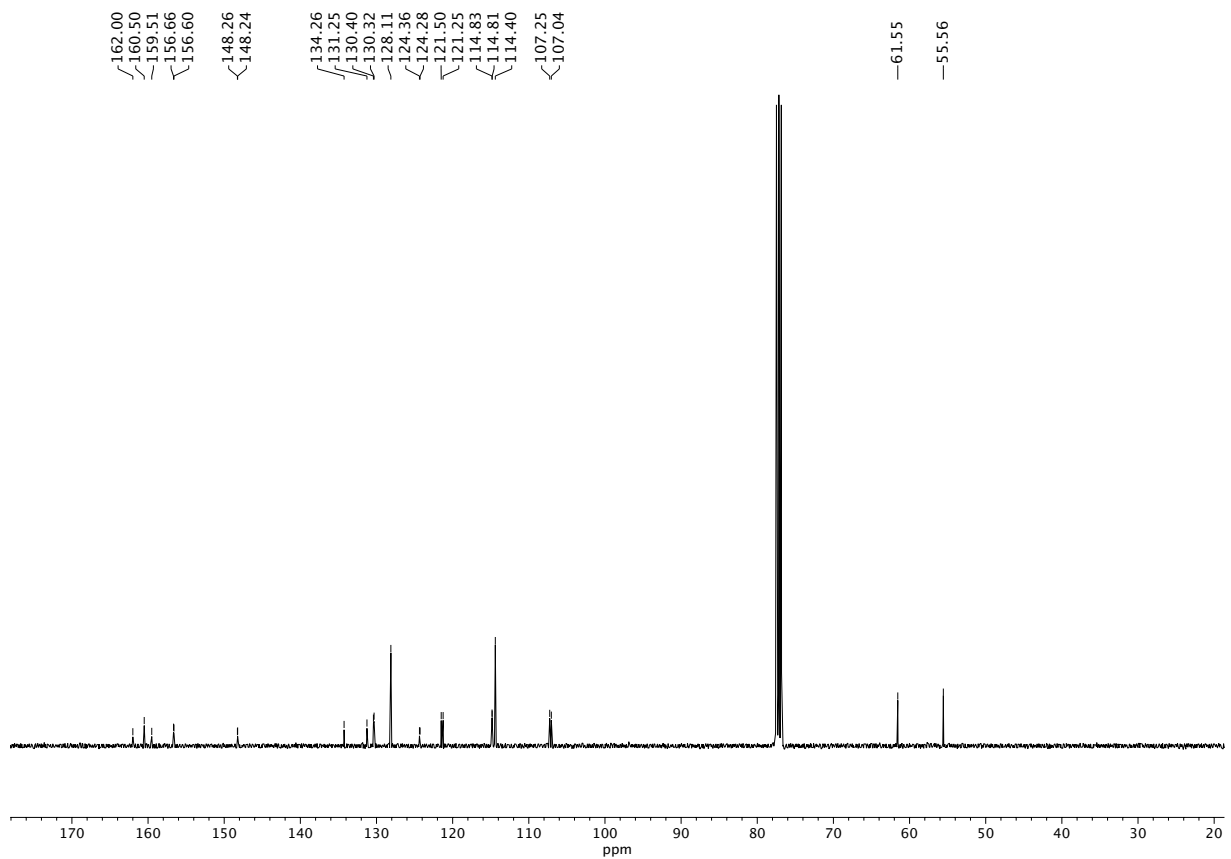

$^{13}\text{C}$  NMR (100 MHz,  $\text{CDCl}_3$ ) of compound **9b**.

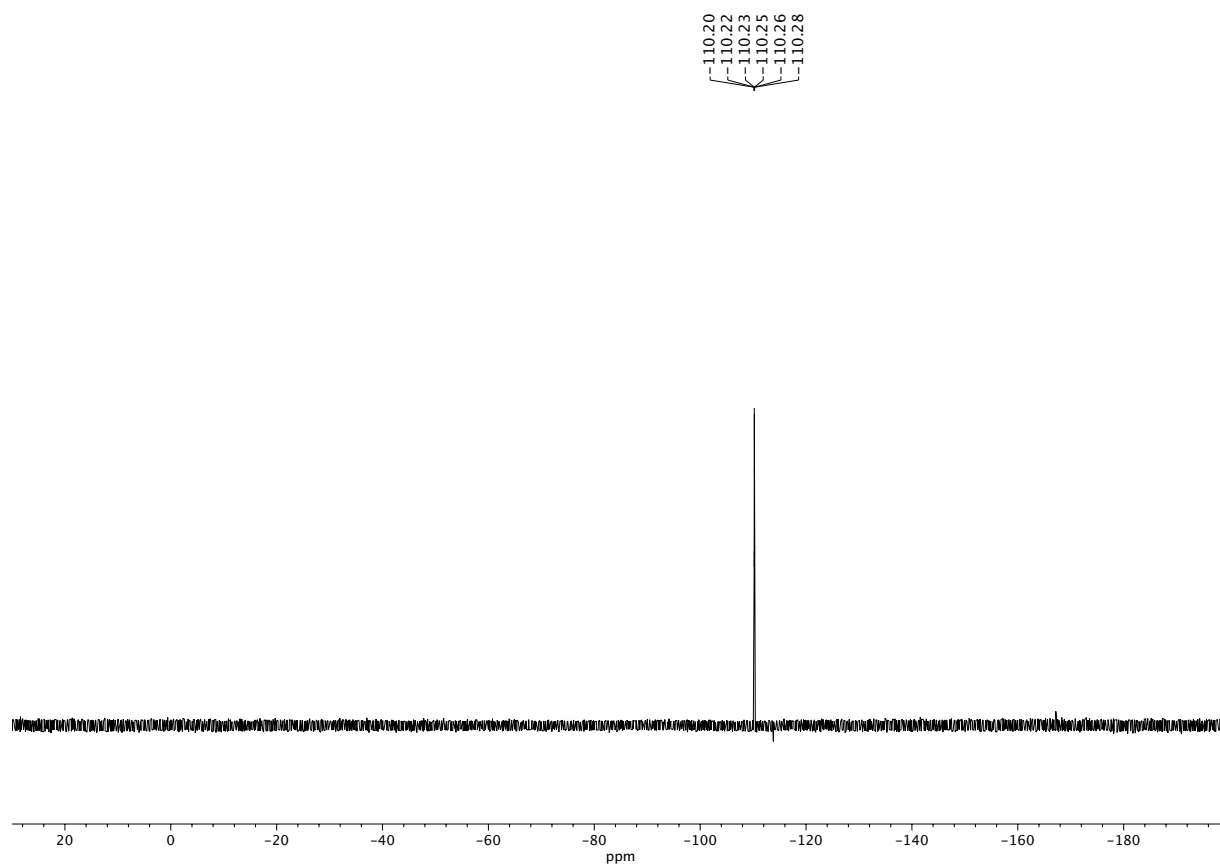

$^{19}\text{F}$  NMR (282 MHz,  $\text{CDCl}_3$ ) of **9b**.

8.21  
8.19  
8.02  
7.97  
7.95  
7.94  
7.93  
7.75  
7.73  
7.55  
7.55  
7.52  
7.51

5.21  
4.94

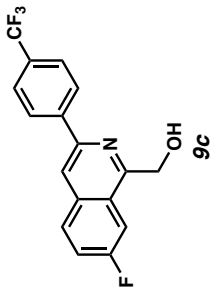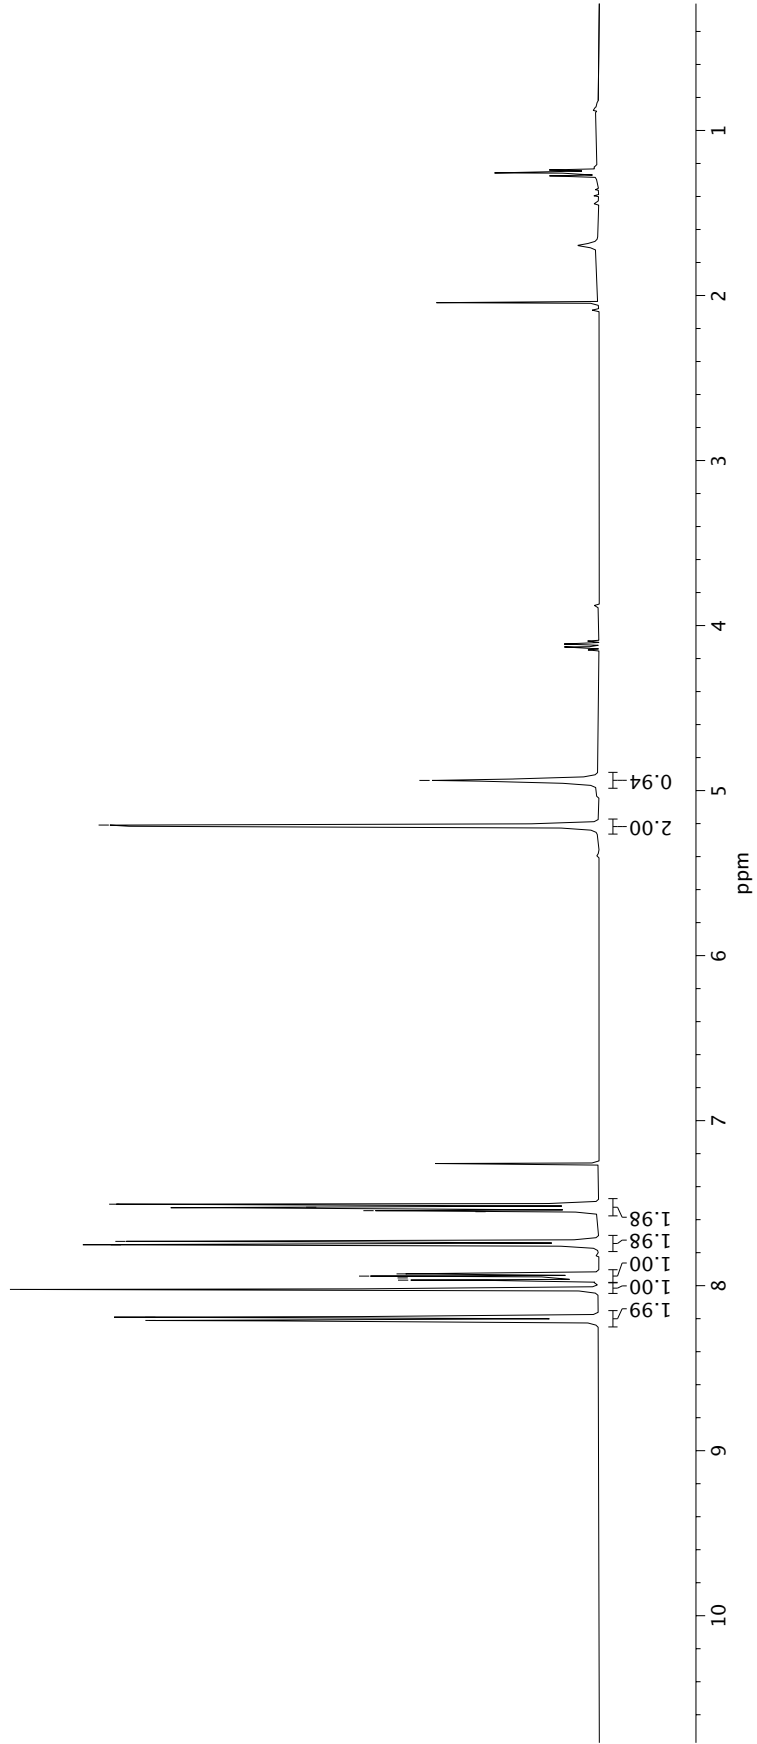

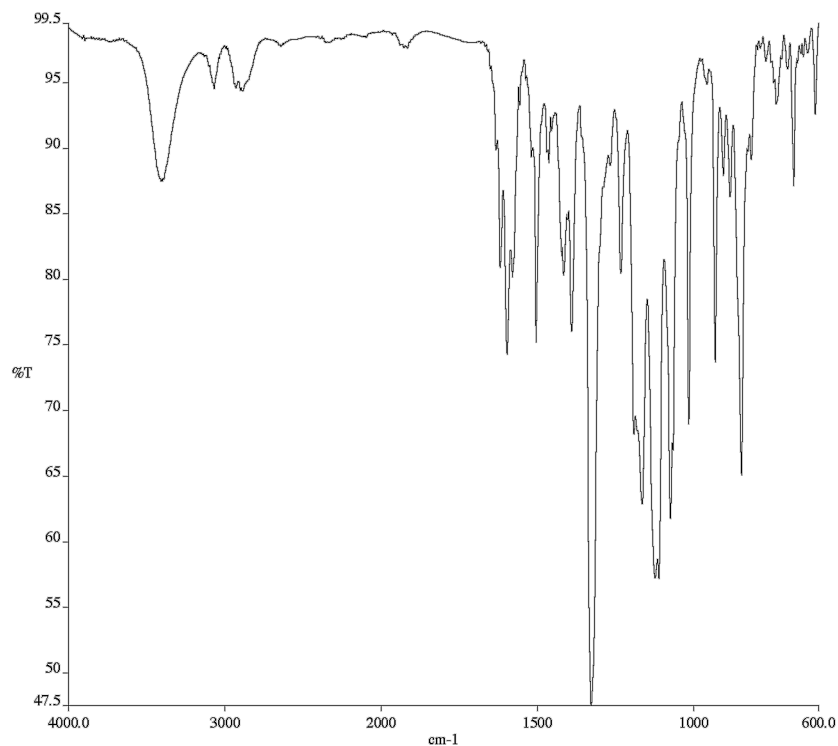

162.57  
 160.07  
 157.35  
 157.29  
 146.83  
 146.80  
 141.93  
 141.91  
 133.83  
 131.21  
 130.88  
 130.75  
 130.66  
 130.56  
 130.24  
 128.35  
 127.00  
 125.95  
 125.91  
 125.87  
 125.83  
 125.64  
 125.25  
 125.17  
 122.94  
 121.83  
 121.58  
 120.24  
 116.79  
 116.77  
 107.48  
 107.27  
 61.66

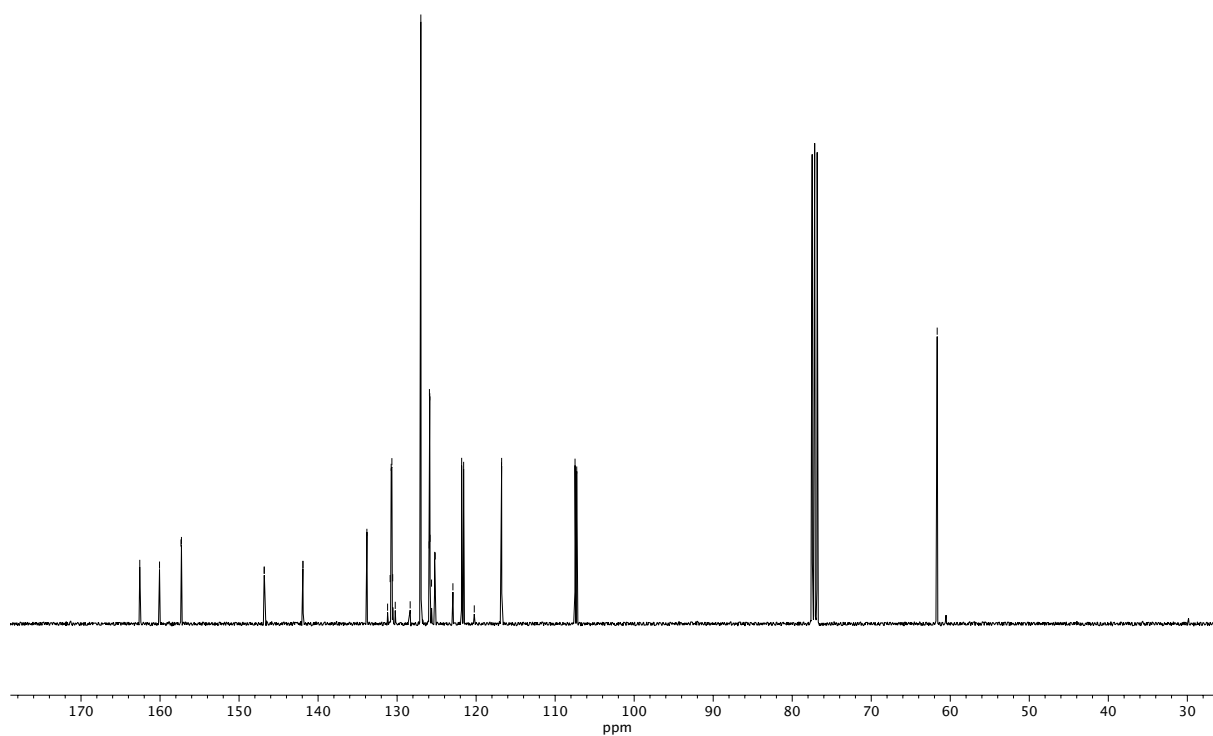

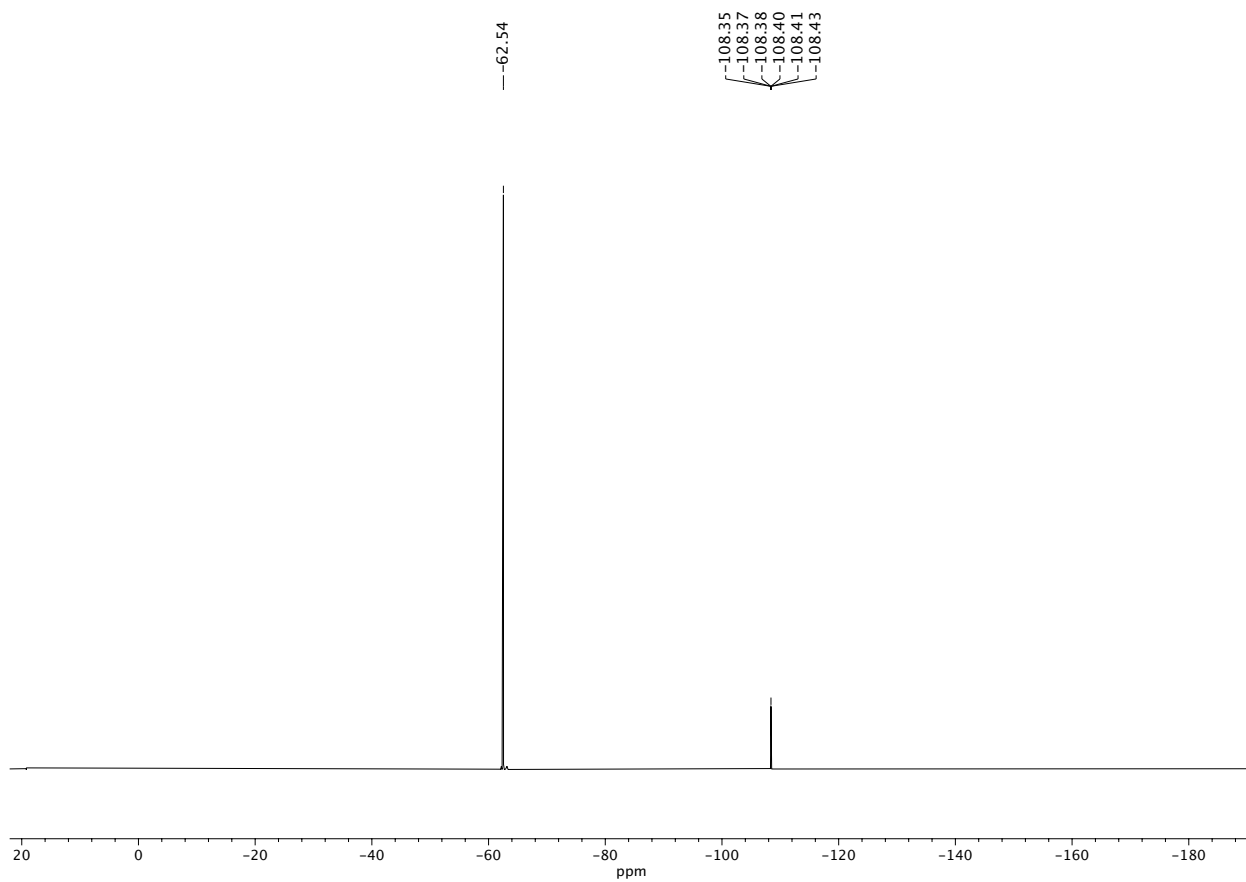

$^{19}\text{F}$  NMR (282 MHz,  $\text{CDCl}_3$ ) of **9c**.



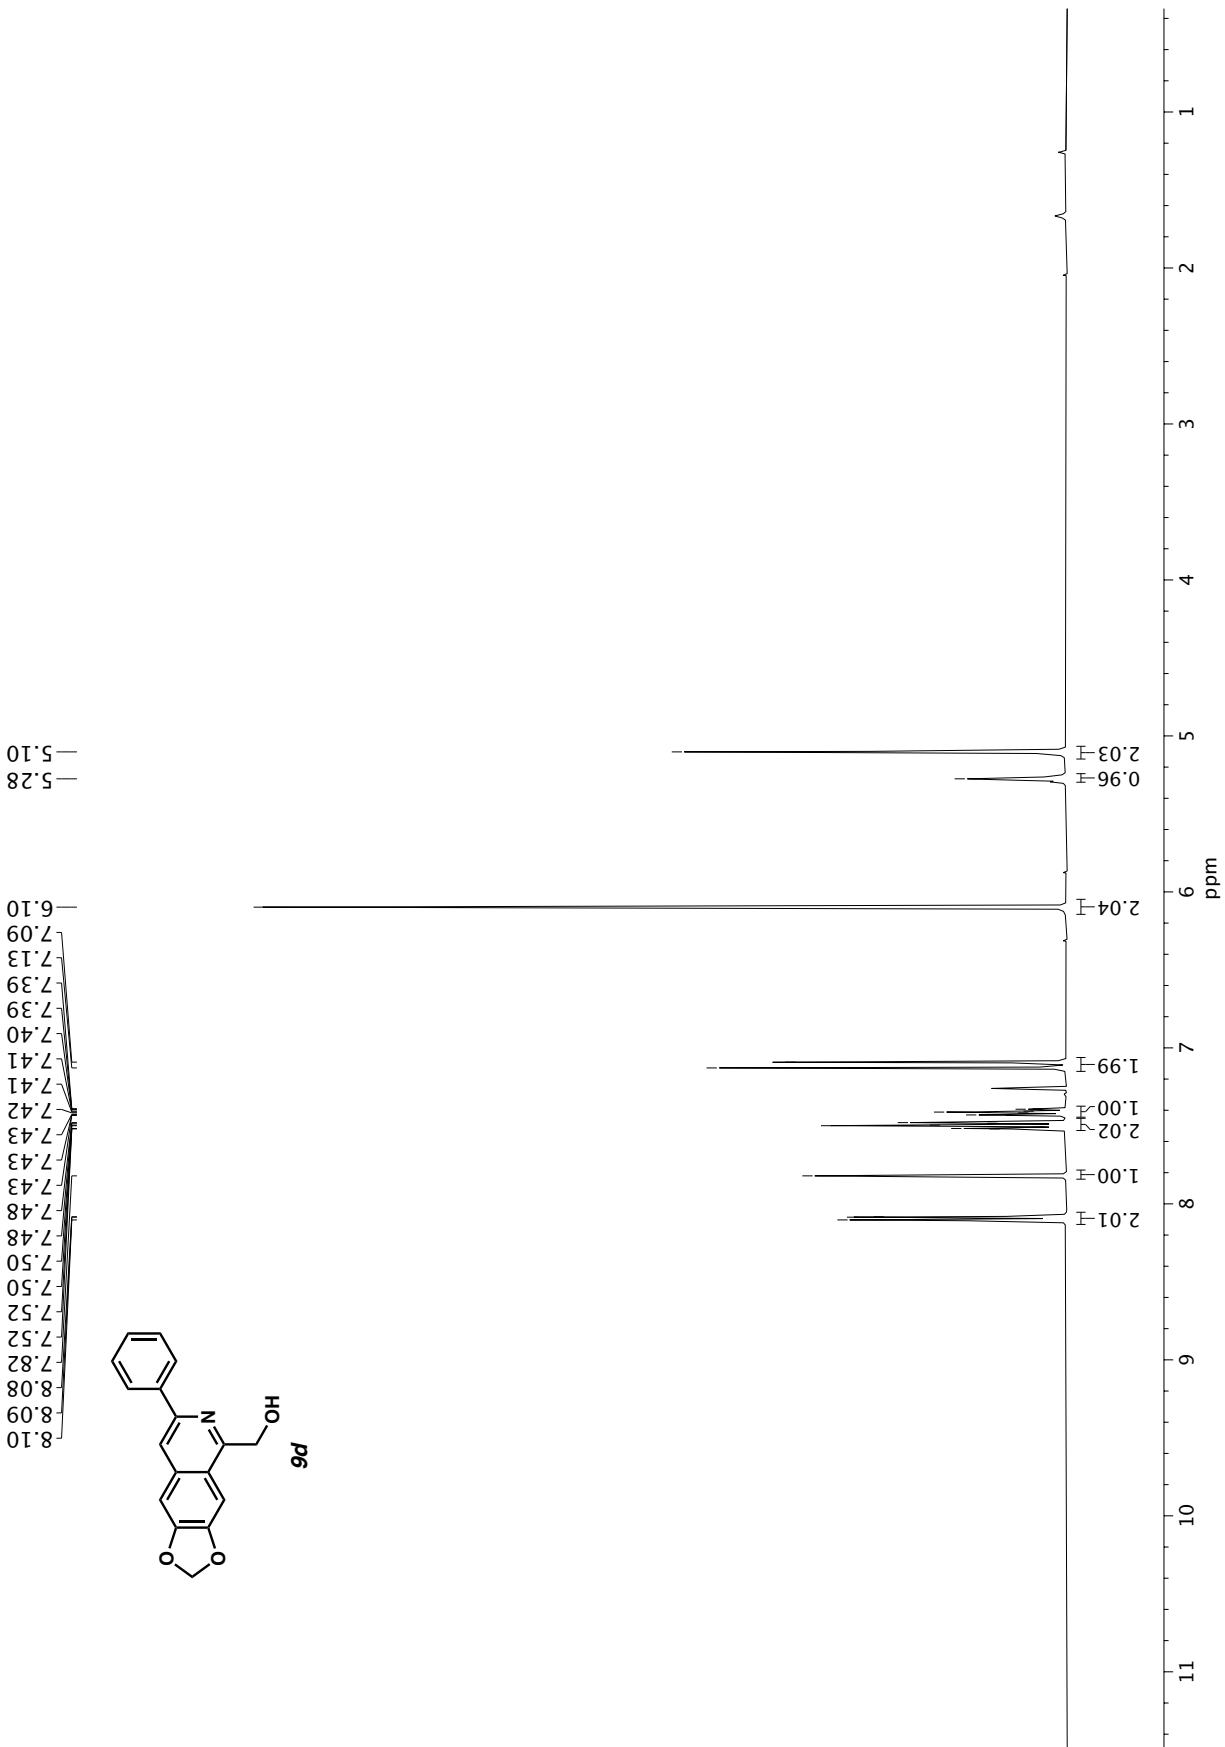

<sup>1</sup>H NMR (400 MHz, CDCl<sub>3</sub>) of compound **9d**.

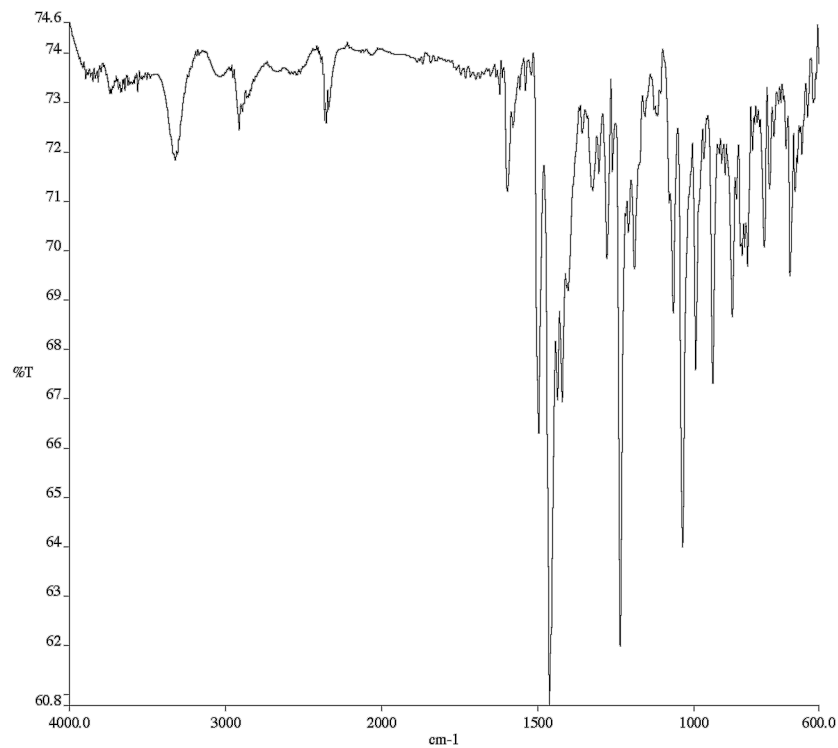

Infrared spectrum (Thin Film, NaCl) of compound **9d**.

~154.87  
 ~151.10  
 ~148.59  
 ~147.80  
 ~138.86  
 ~135.38  
 ~128.76  
 ~128.54  
 ~126.59  
 ~120.92  
 ~115.89  
 ~103.64  
 ~101.86  
 ~99.29  
 —61.39

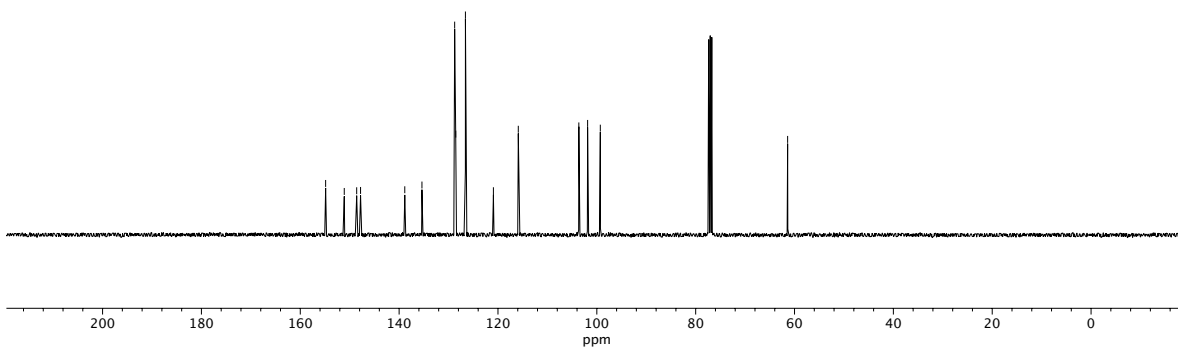

$^{13}\text{C}$  NMR (100 MHz,  $\text{CDCl}_3$ ) of compound **9d**.

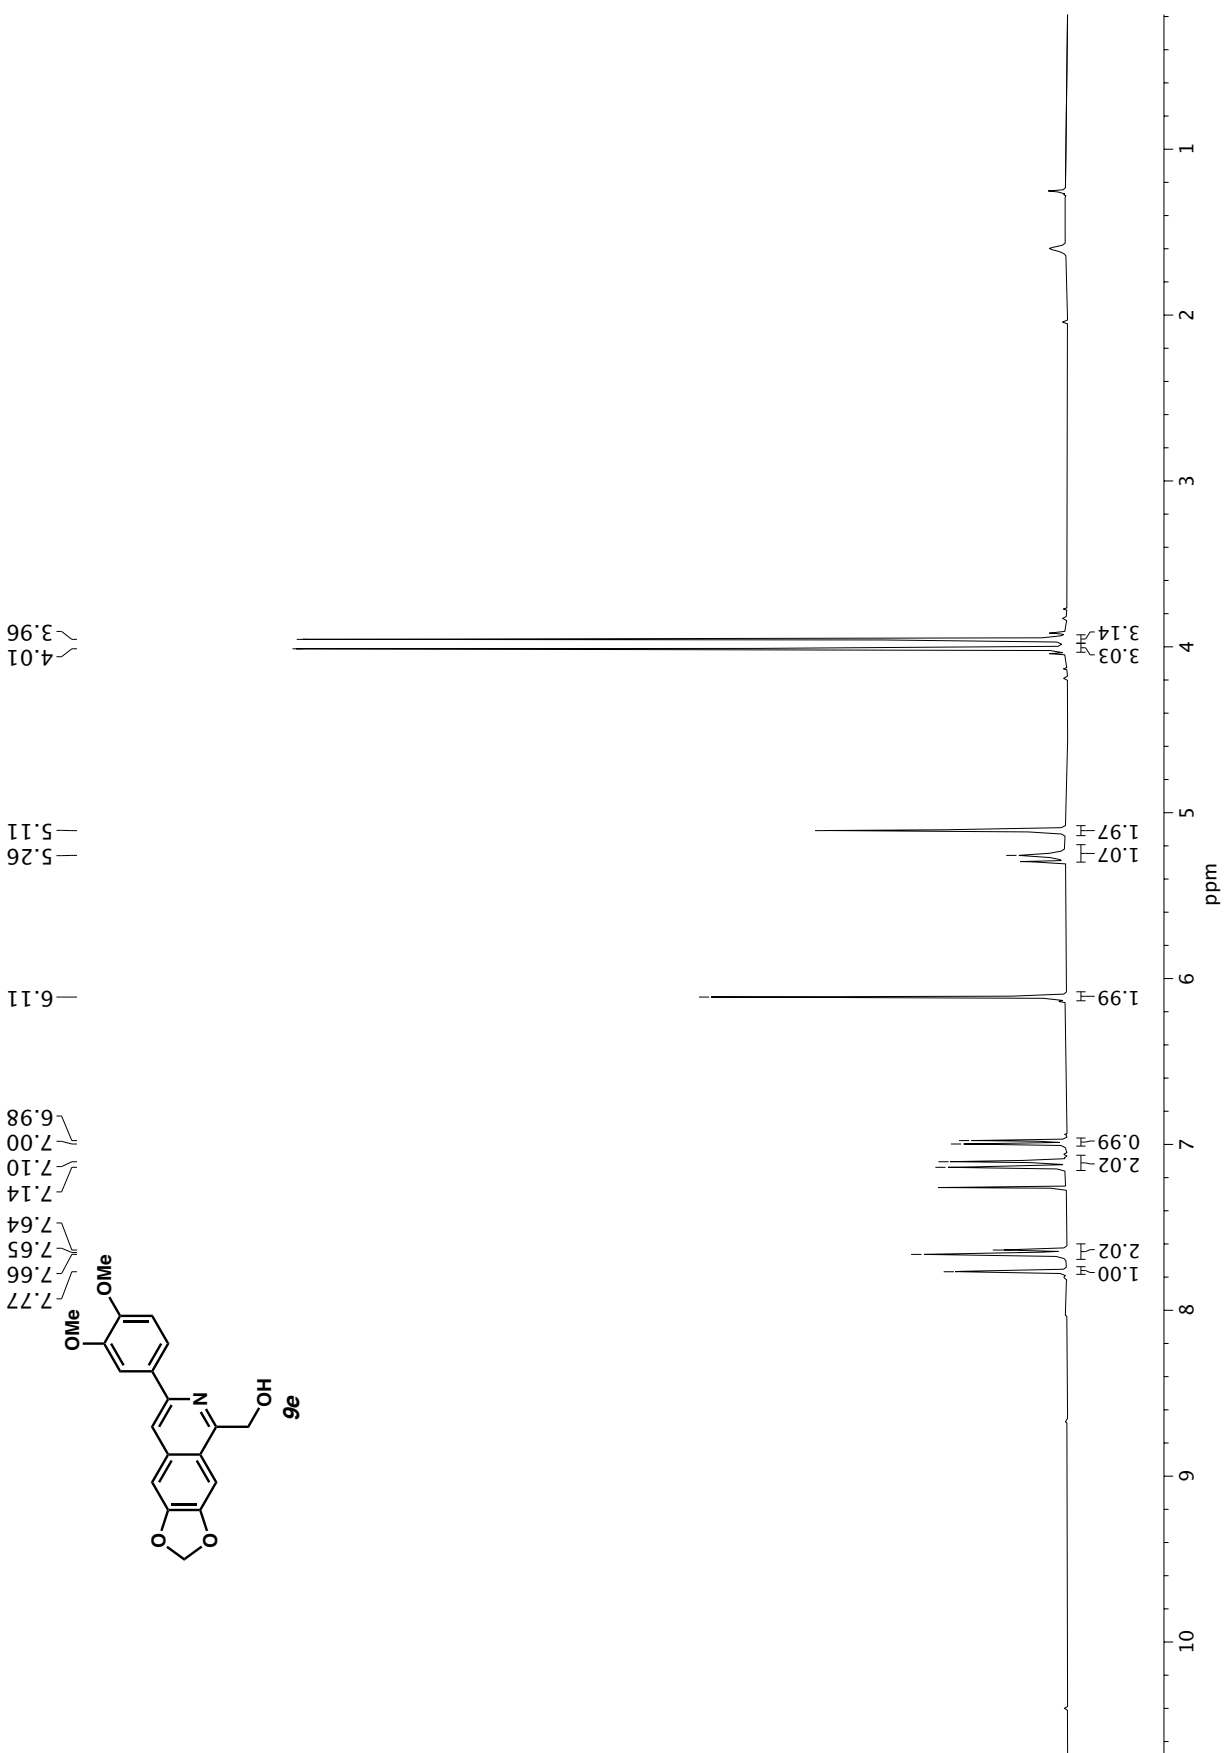

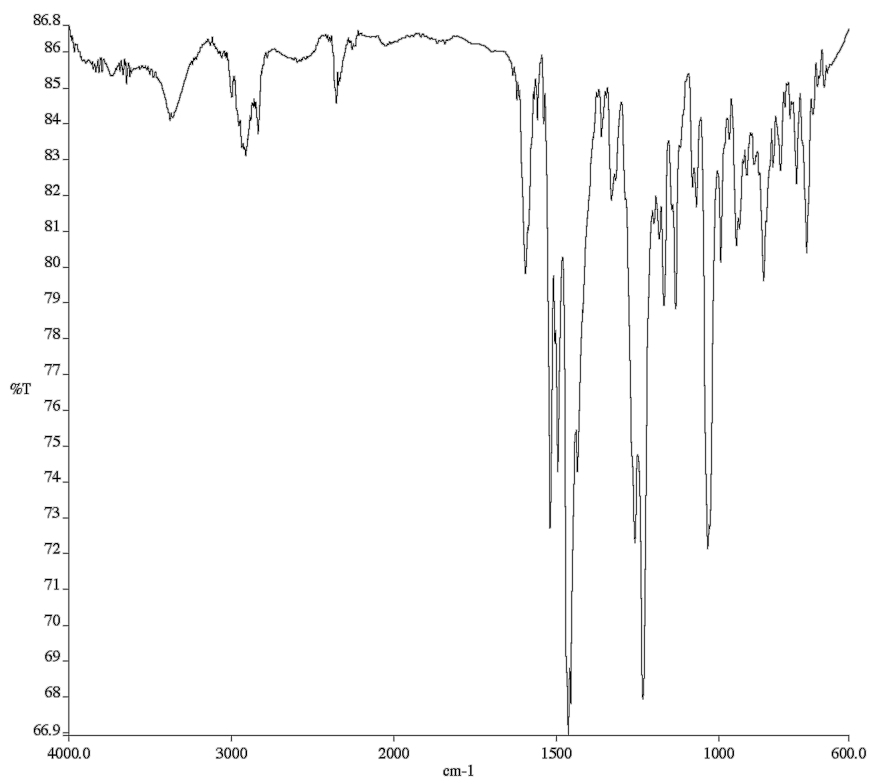

Infrared spectrum (Thin Film, NaCl) of compound **9e**.

154.72  
 151.12  
 149.66  
 149.23  
 148.40  
 147.67  
 135.51  
 131.90  
 120.60  
 119.17  
 115.14  
 111.27  
 109.69  
 103.49  
 101.82  
 99.32  
 61.37  
 56.04  
 56.02

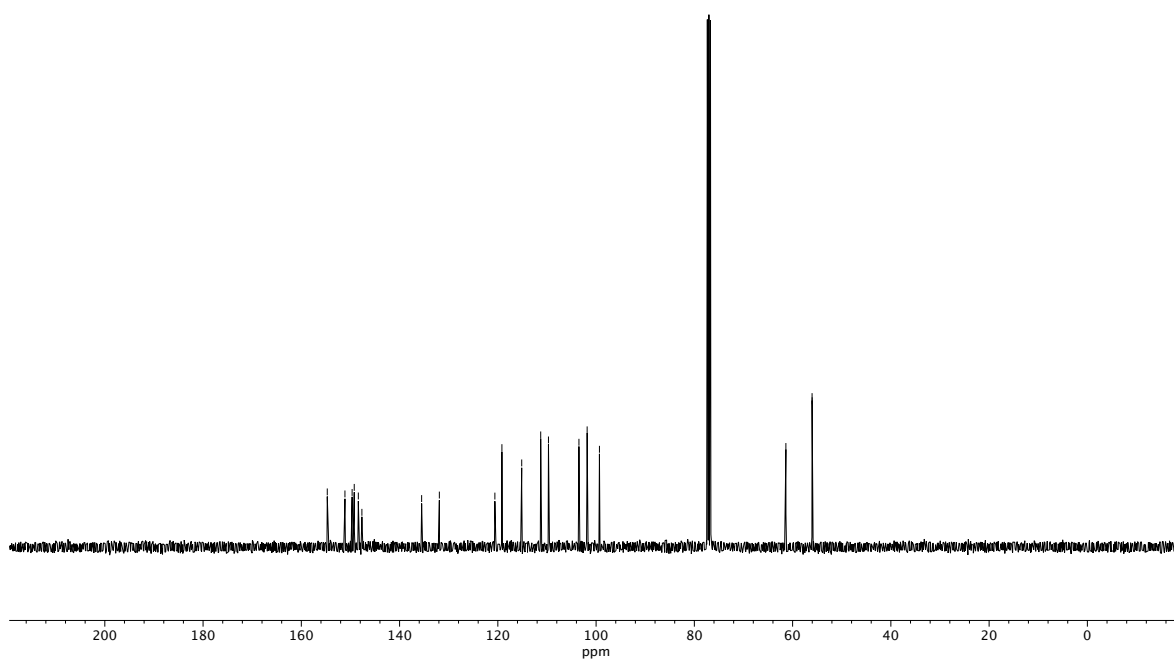

$^{13}\text{C}$  NMR (100 MHz,  $\text{CDCl}_3$ ) of compound **9e**.

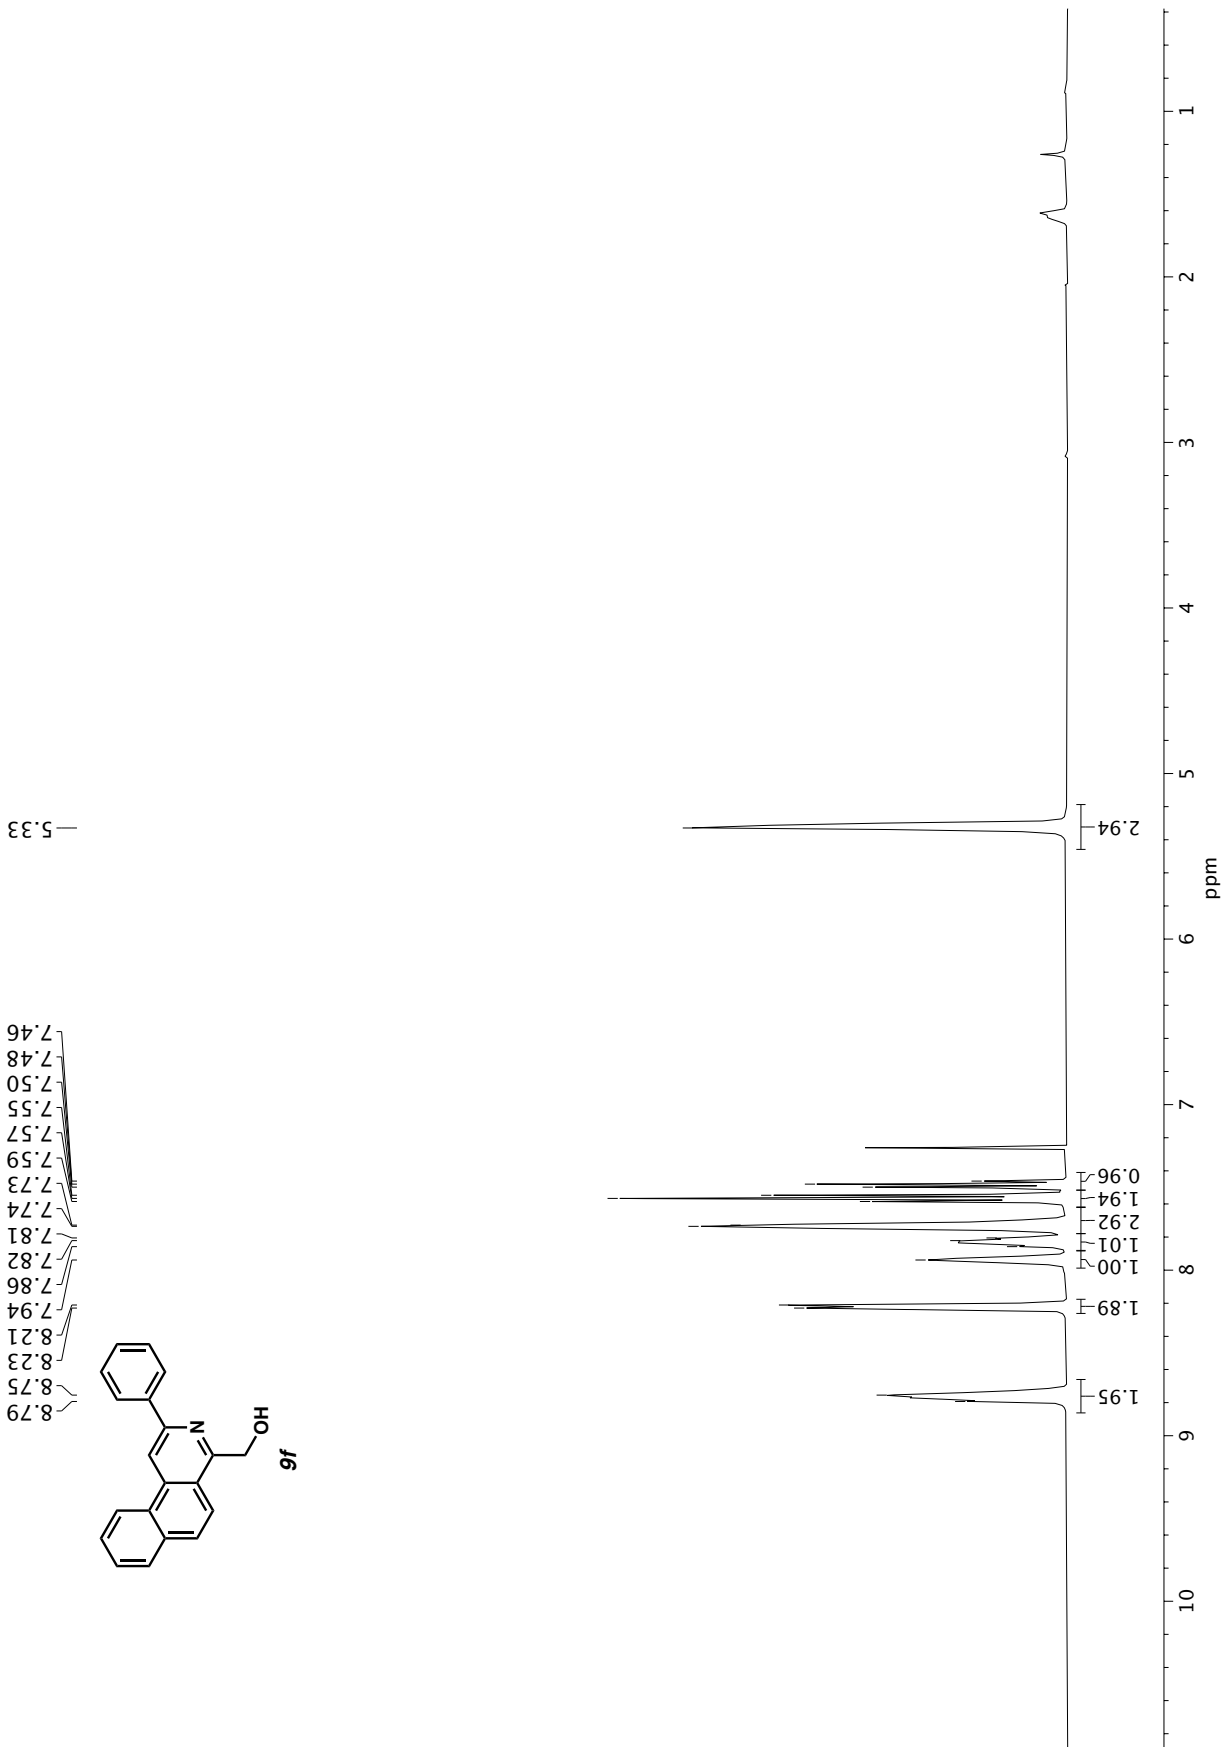

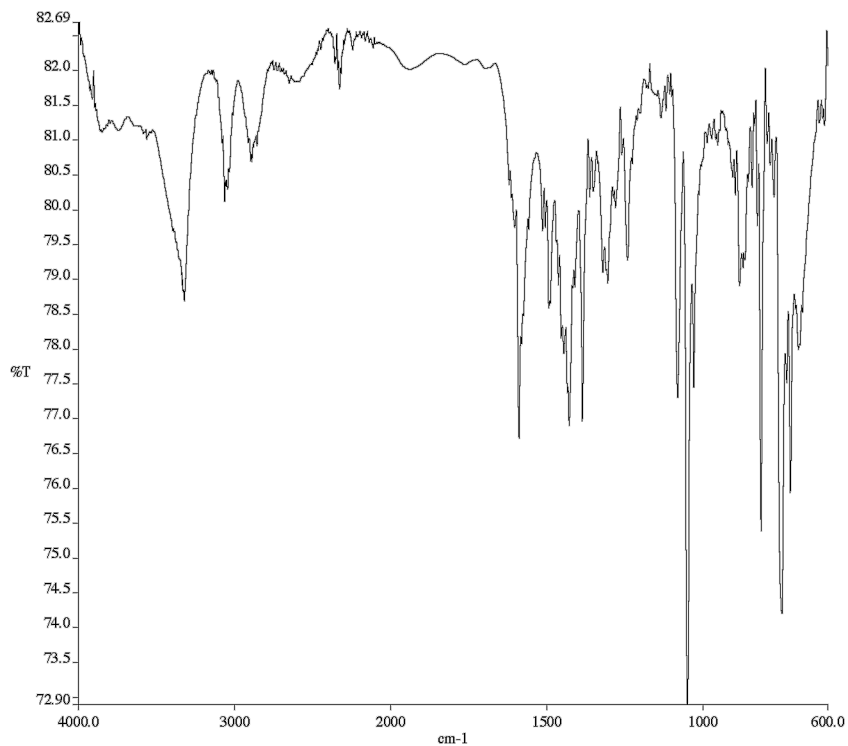

Infrared spectrum (Thin Film, NaCl) of compound **9f**.

156.33  
150.44  
139.17  
135.87  
133.50  
128.97  
128.95  
128.90  
128.82  
128.55  
127.46  
127.05  
123.46  
122.05  
119.98  
119.96  
111.74

61.65

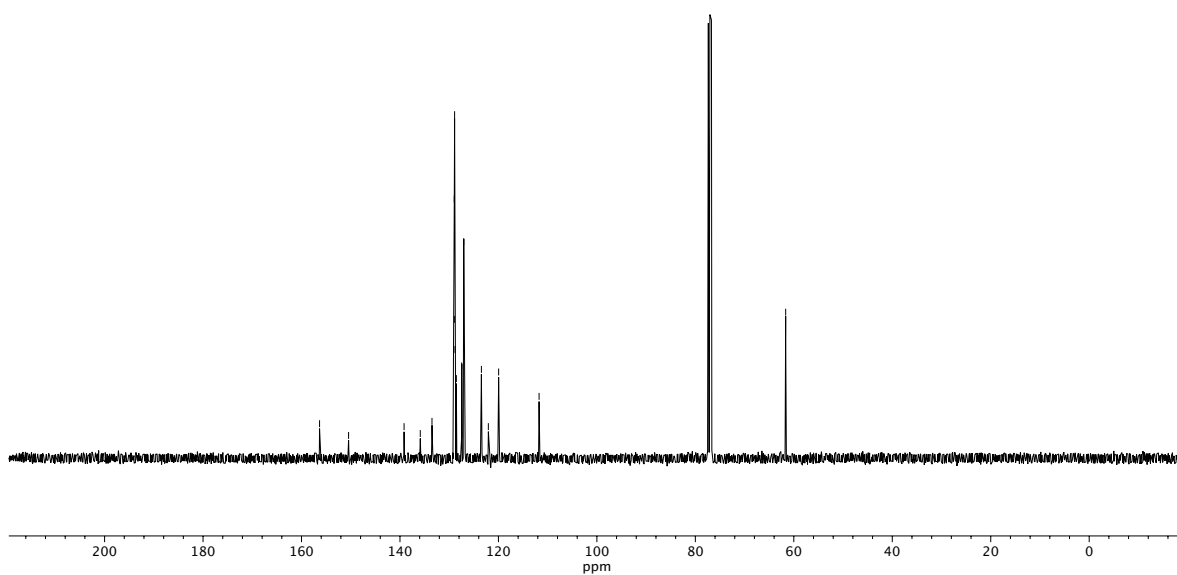

<sup>13</sup>C NMR (100 MHz, CDCl<sub>3</sub>) of compound **9f**.

<sup>1</sup>H NMR (400 MHz, CDCl<sub>3</sub>) of compound **11a**.

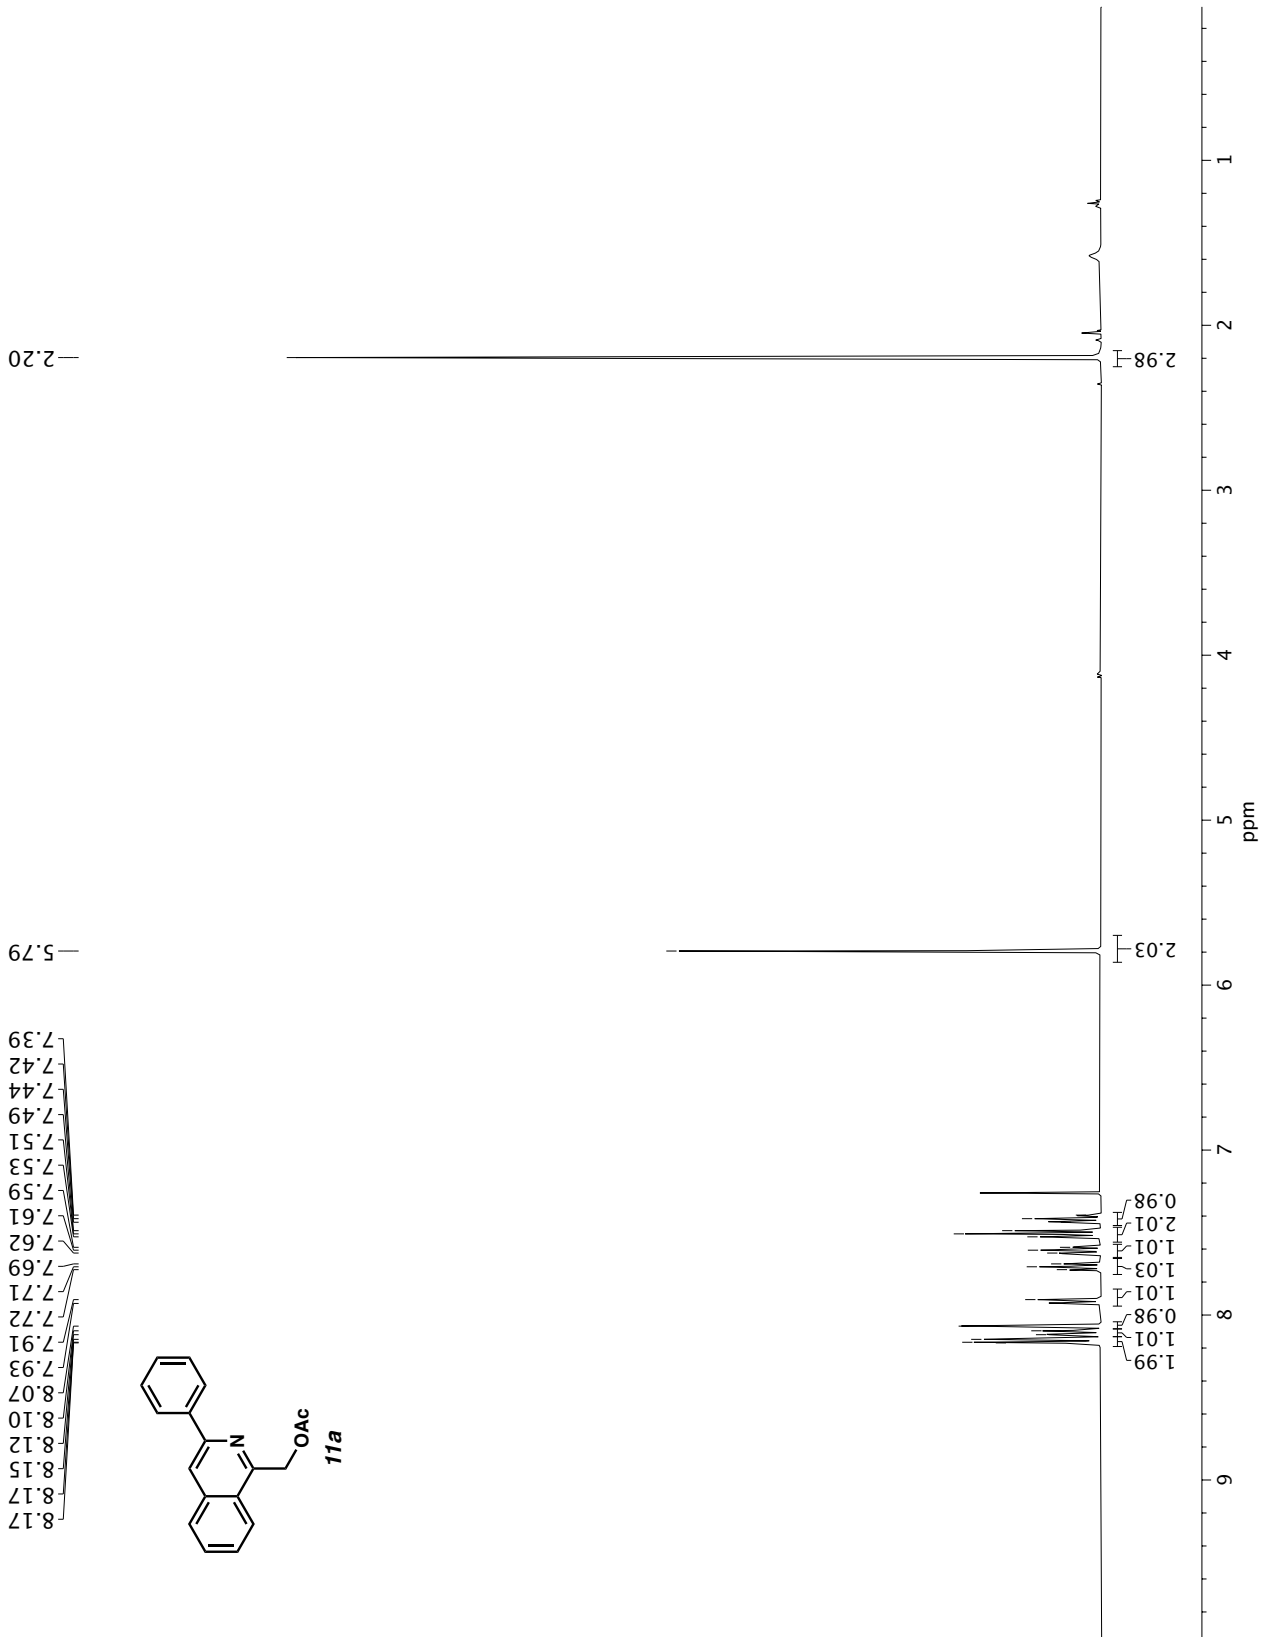

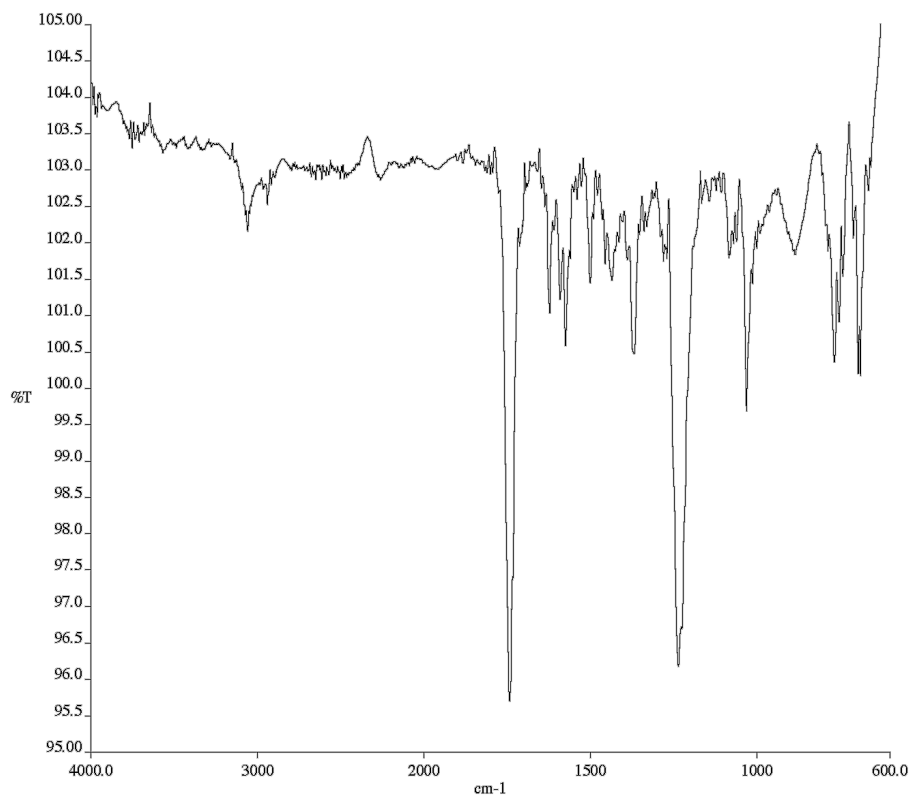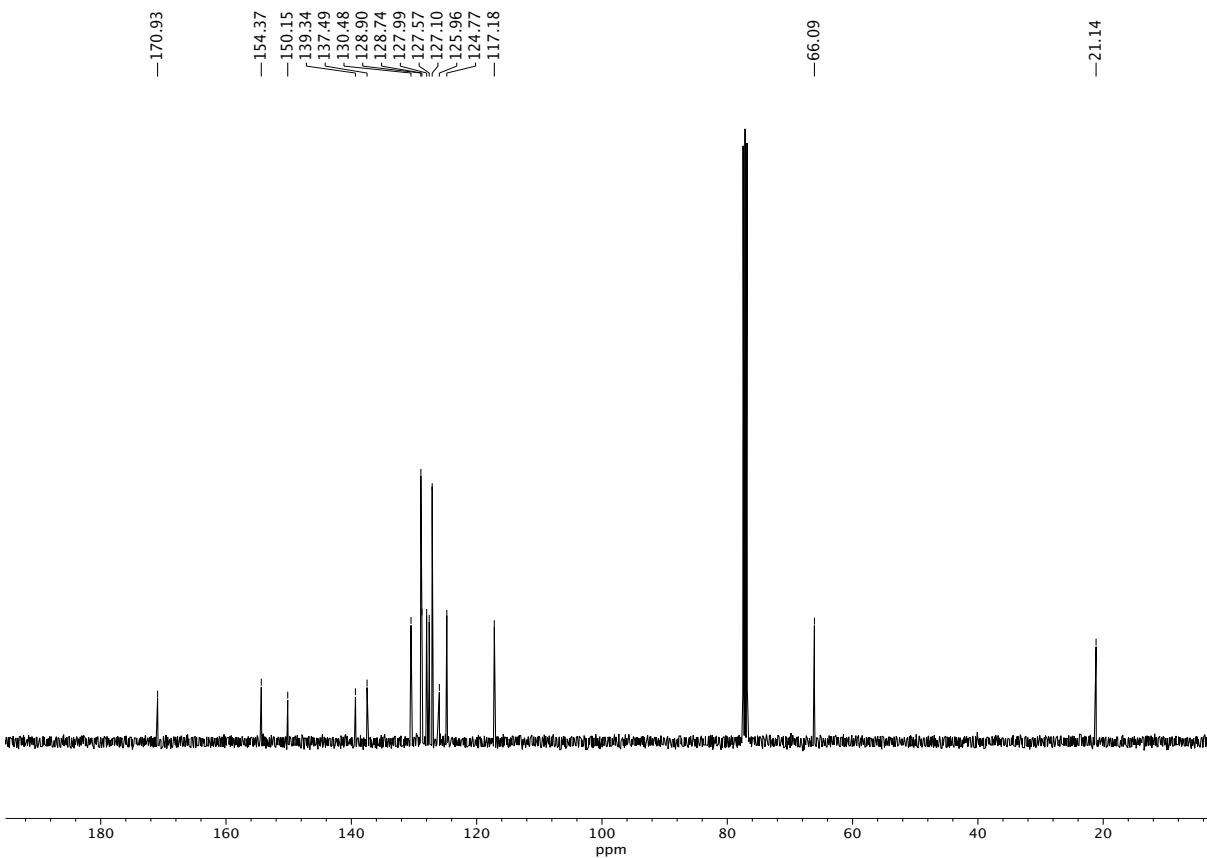



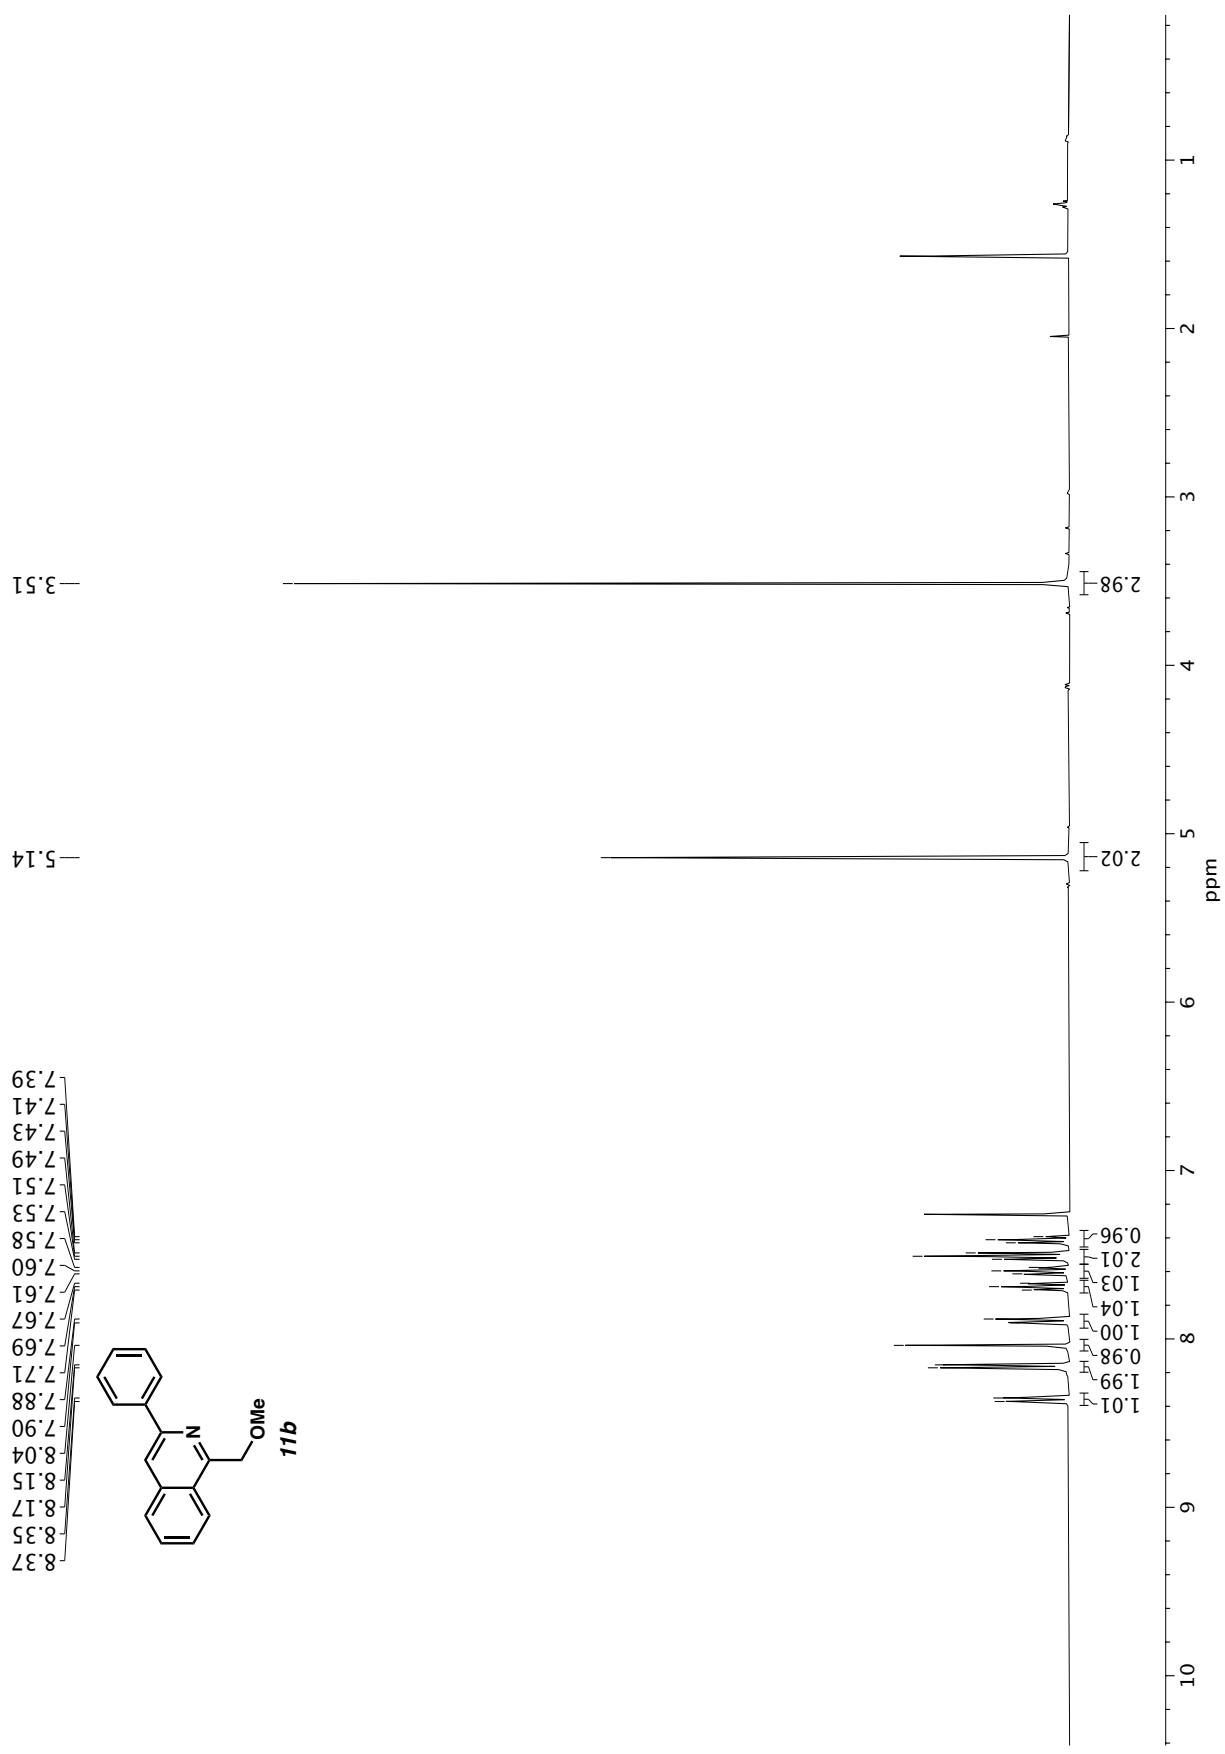

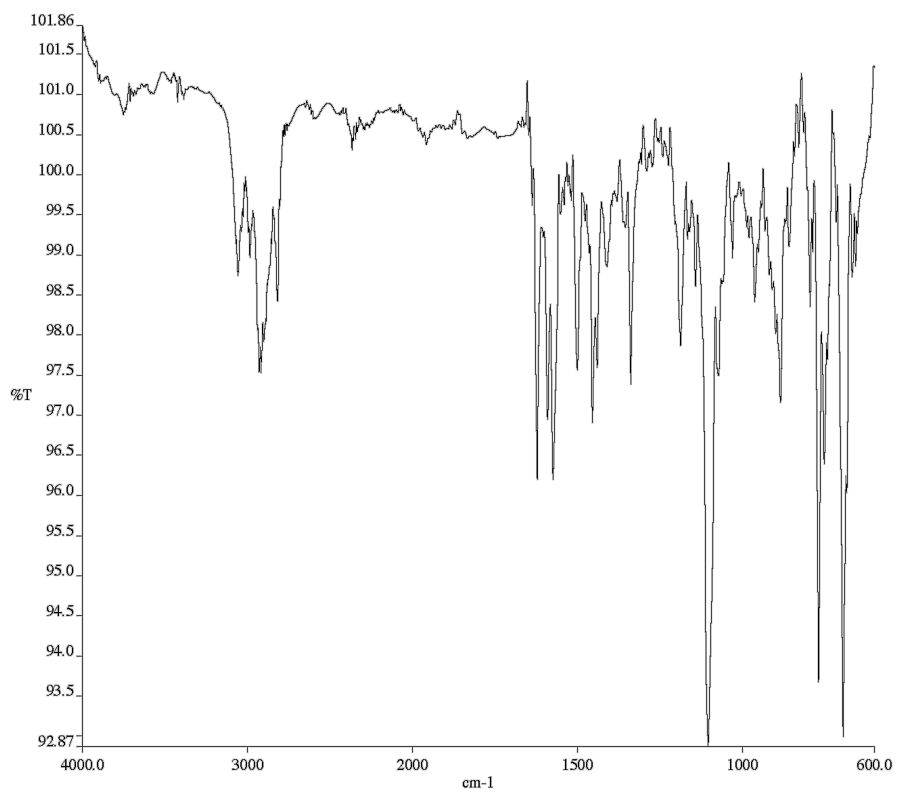

Infrared spectrum (Thin Film, NaCl) of compound **11b**.

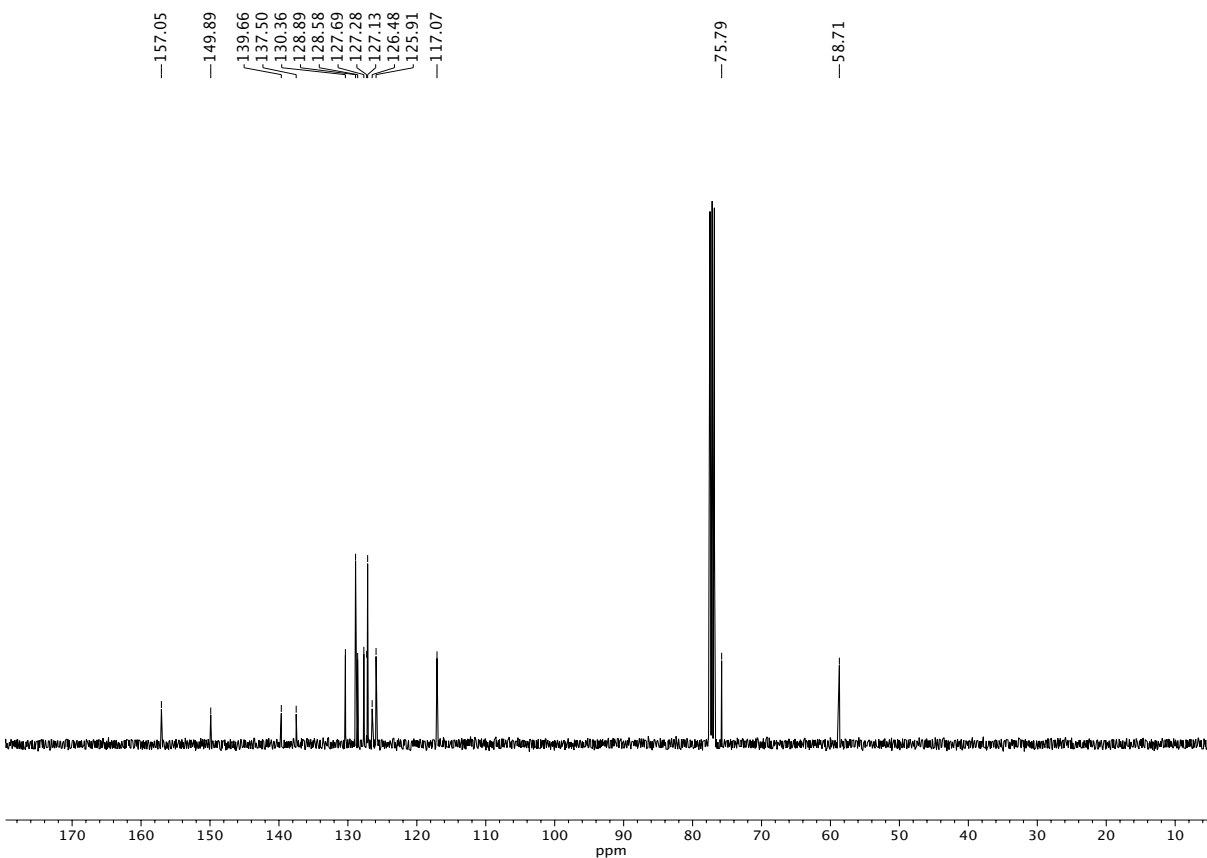

<sup>13</sup>C NMR (100 MHz, CDCl<sub>3</sub>) of compound **11b**.

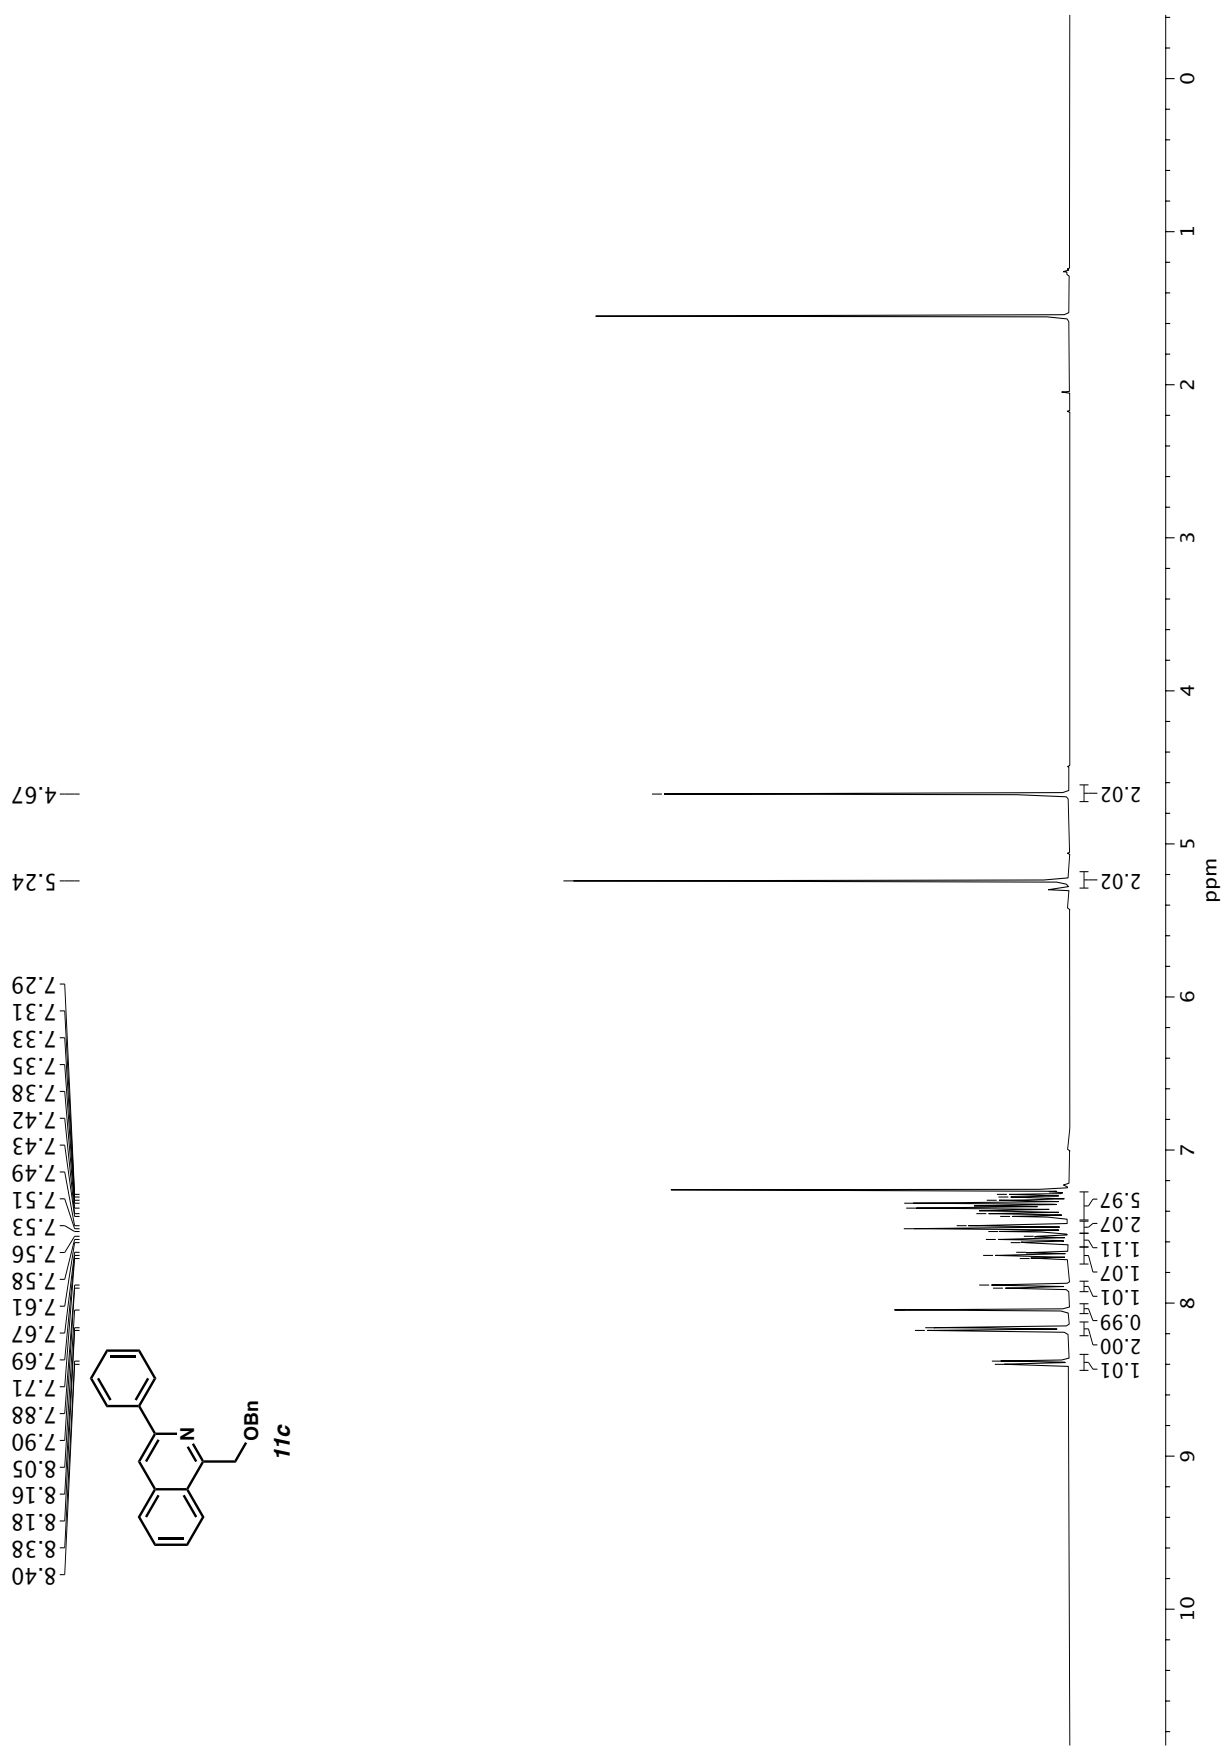

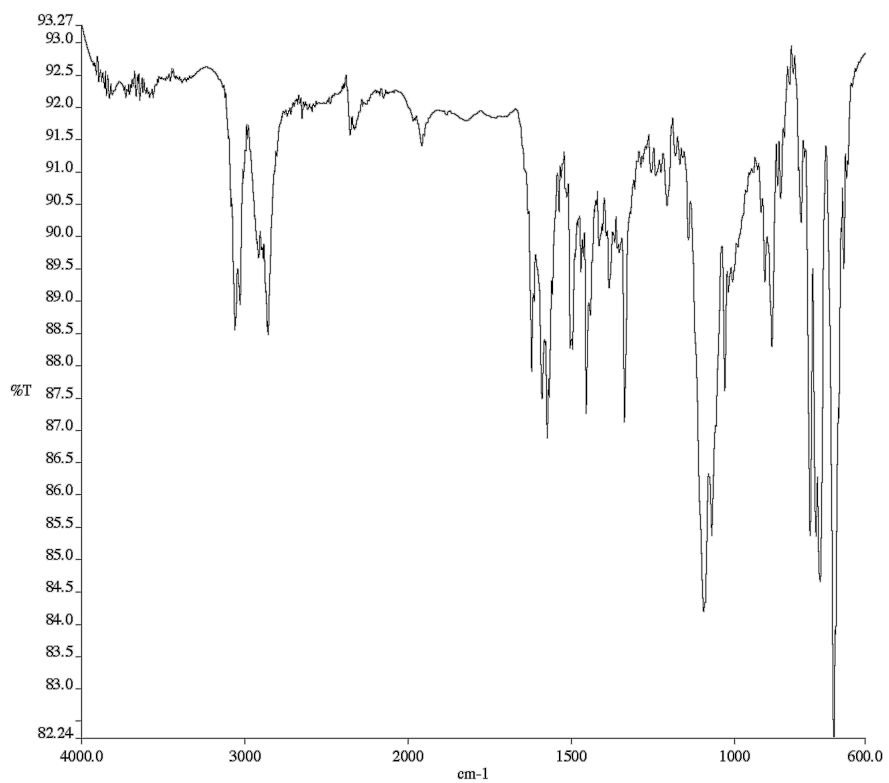

Infrared spectrum (Thin Film, NaCl) of compound **11c**.

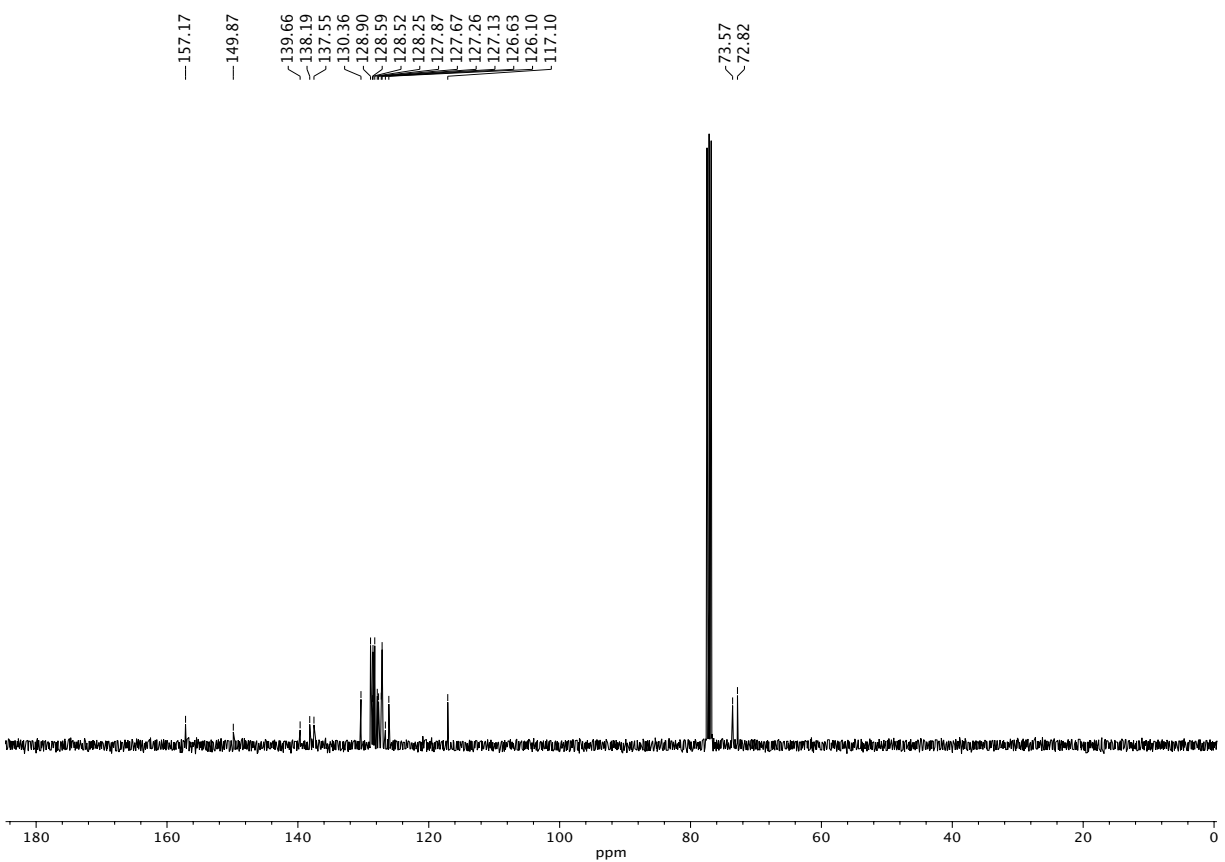

$^{13}\text{C}$  NMR (100 MHz,  $\text{CDCl}_3$ ) of compound **11c**.

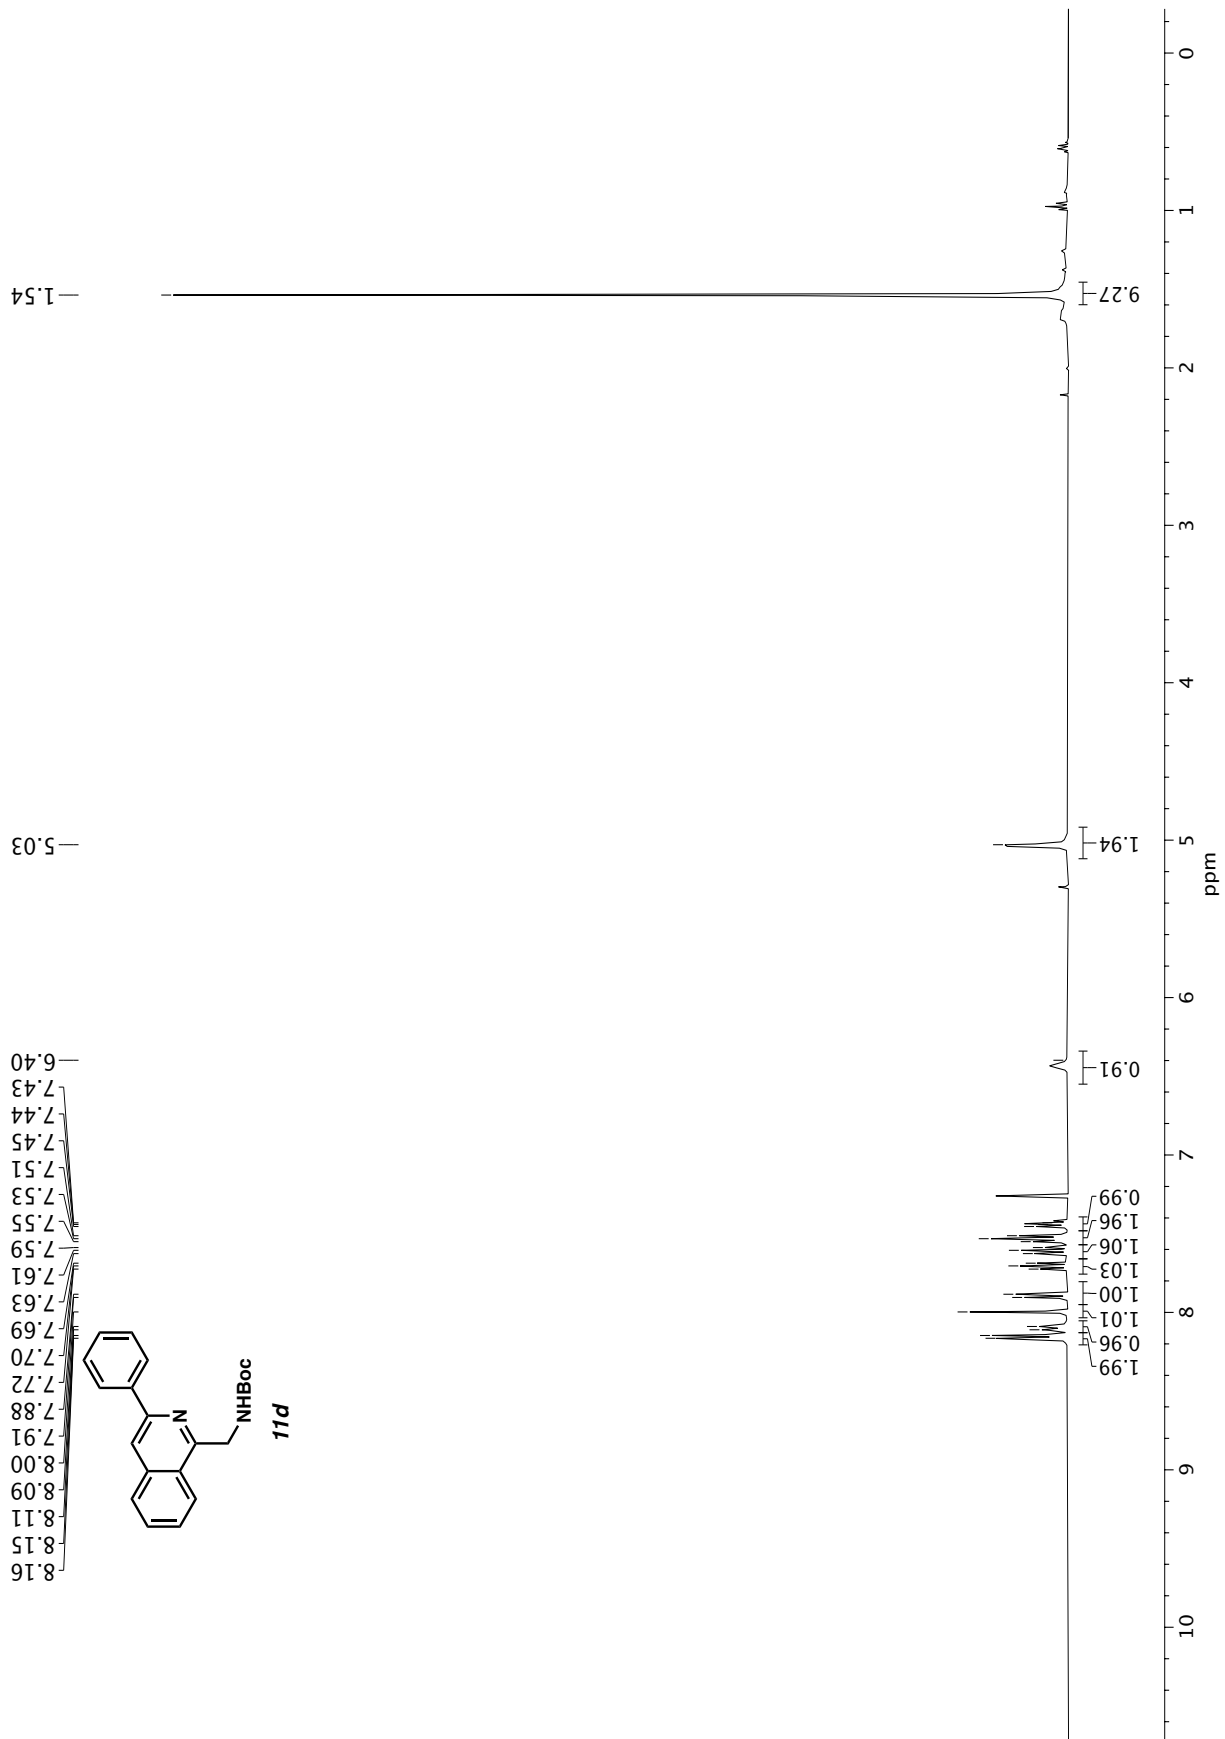

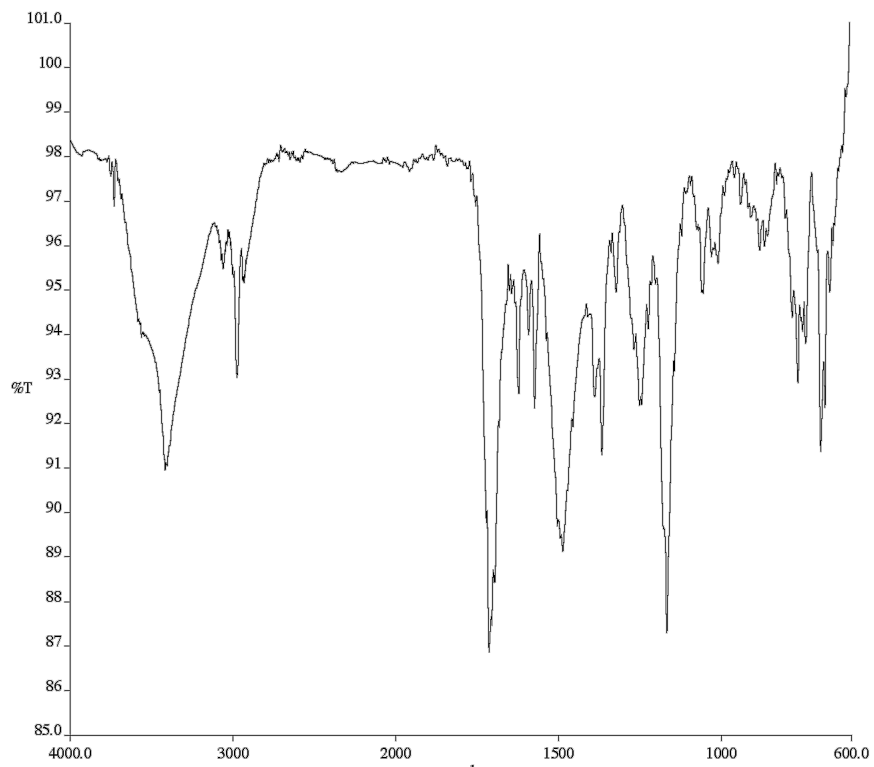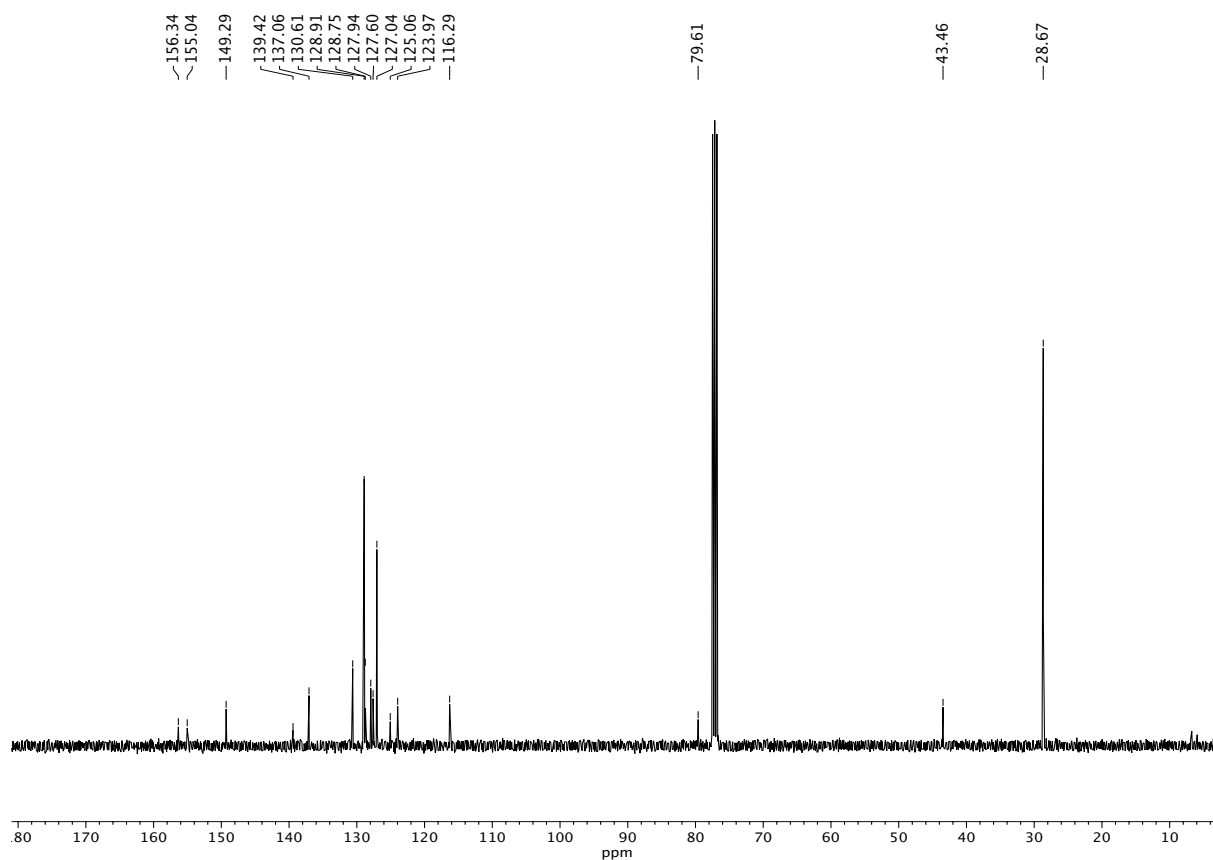

7.46  
7.47  
7.49  
7.54  
7.56  
7.58  
7.71  
7.73  
7.75  
7.77  
7.79  
7.96  
7.98  
8.23  
8.25  
8.31  
9.31  
9.33

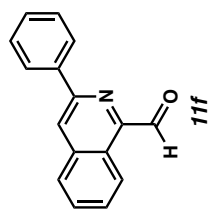

-10.50

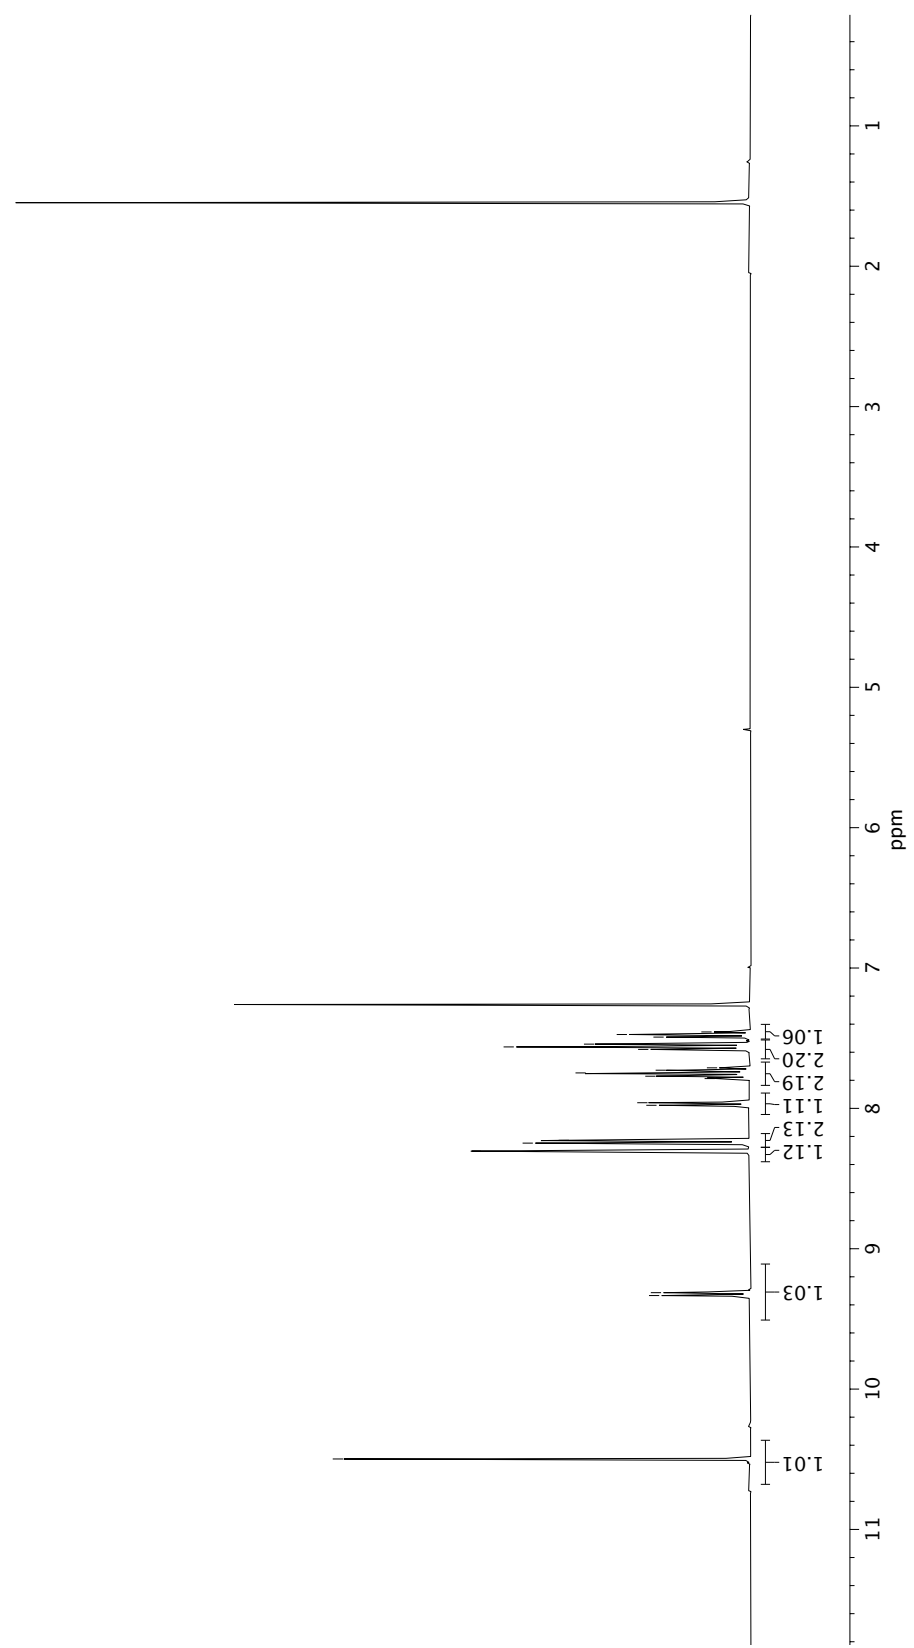

<sup>1</sup>H NMR (400 MHz, CDCl<sub>3</sub>) of compound **11f**.

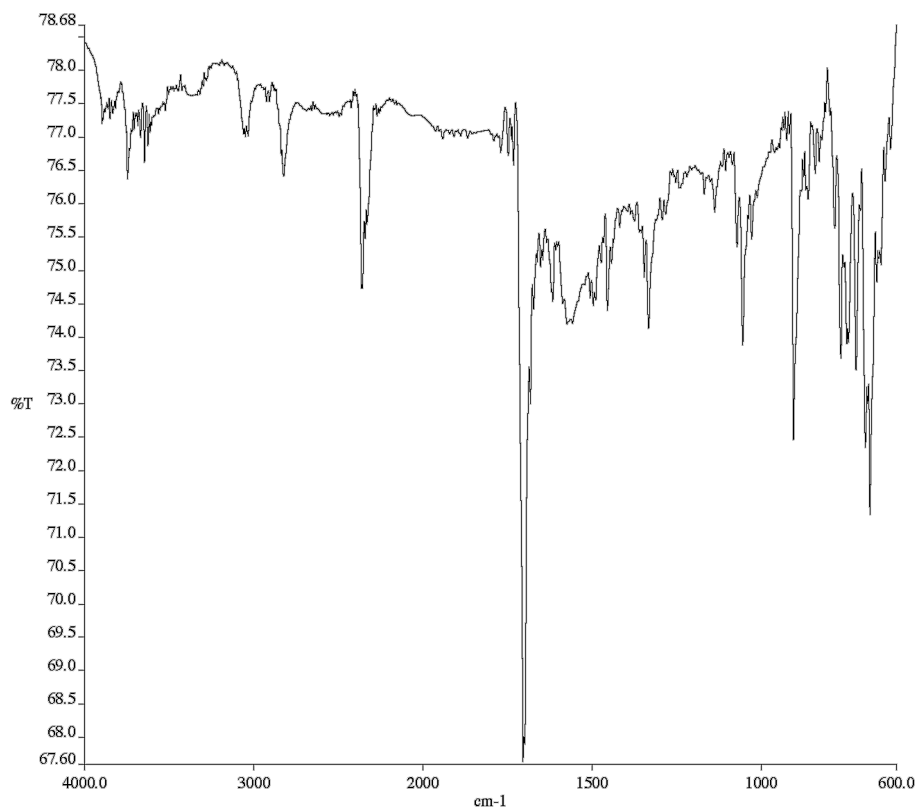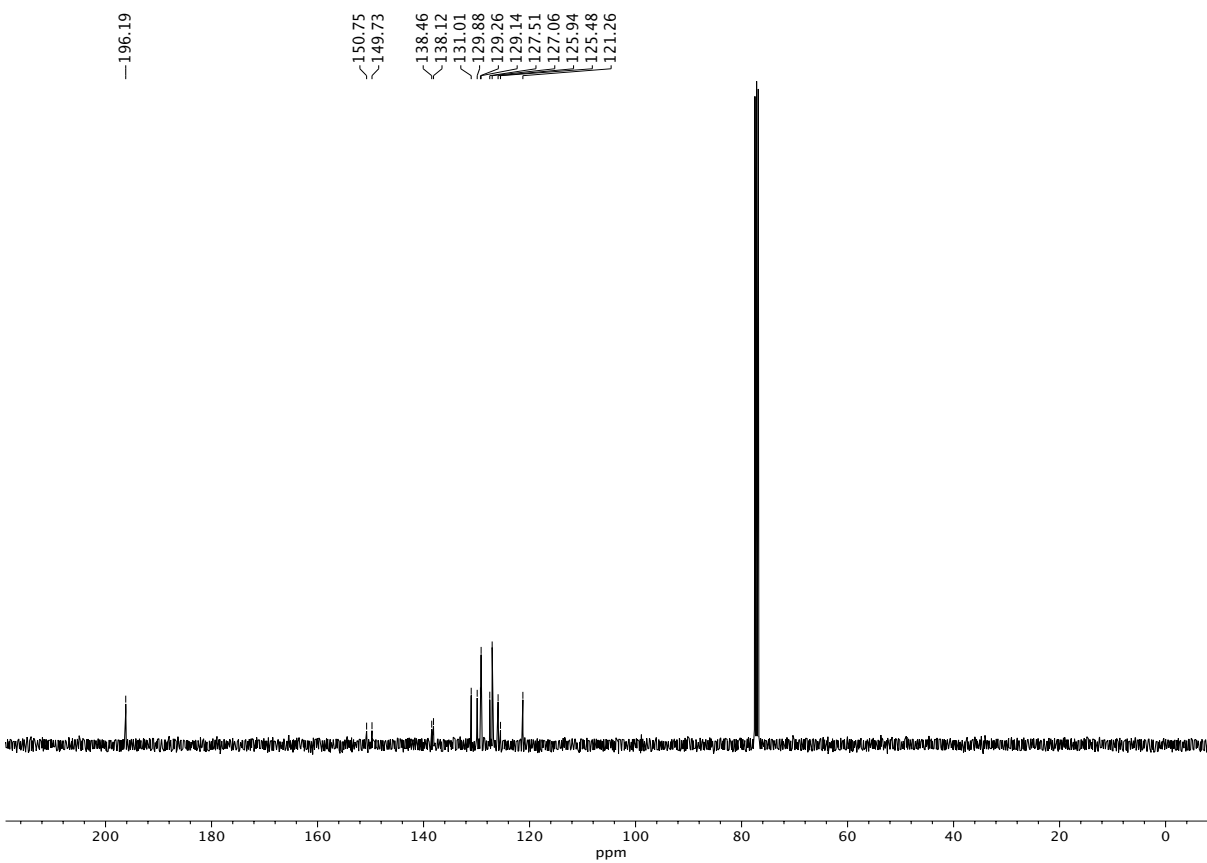





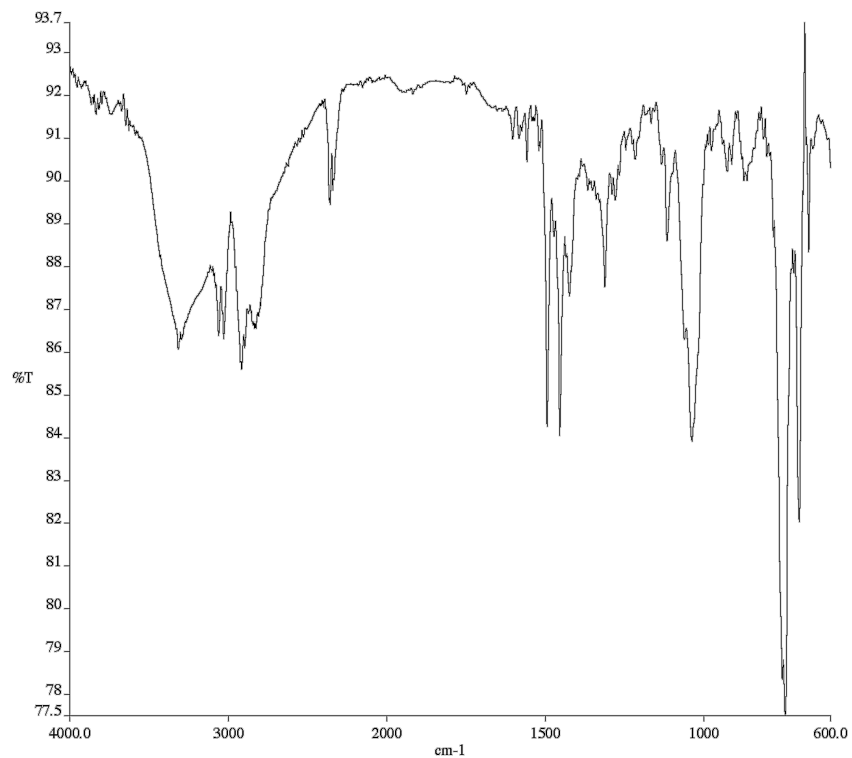

-144.28  
 -136.65  
 -134.93  
 -129.28  
 -128.77  
 -127.73  
 -126.83  
 -126.72  
 -126.52  
 -125.47  
 -66.67  
 -58.65  
 -57.71  
 -38.99

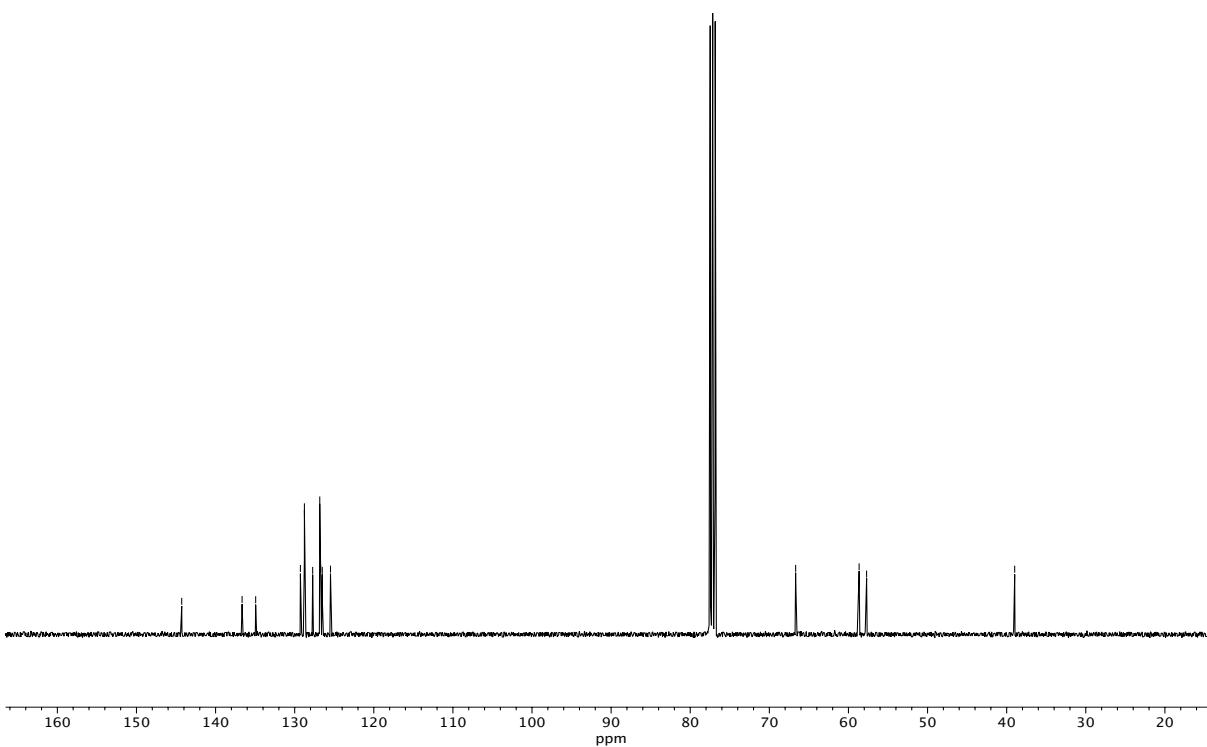

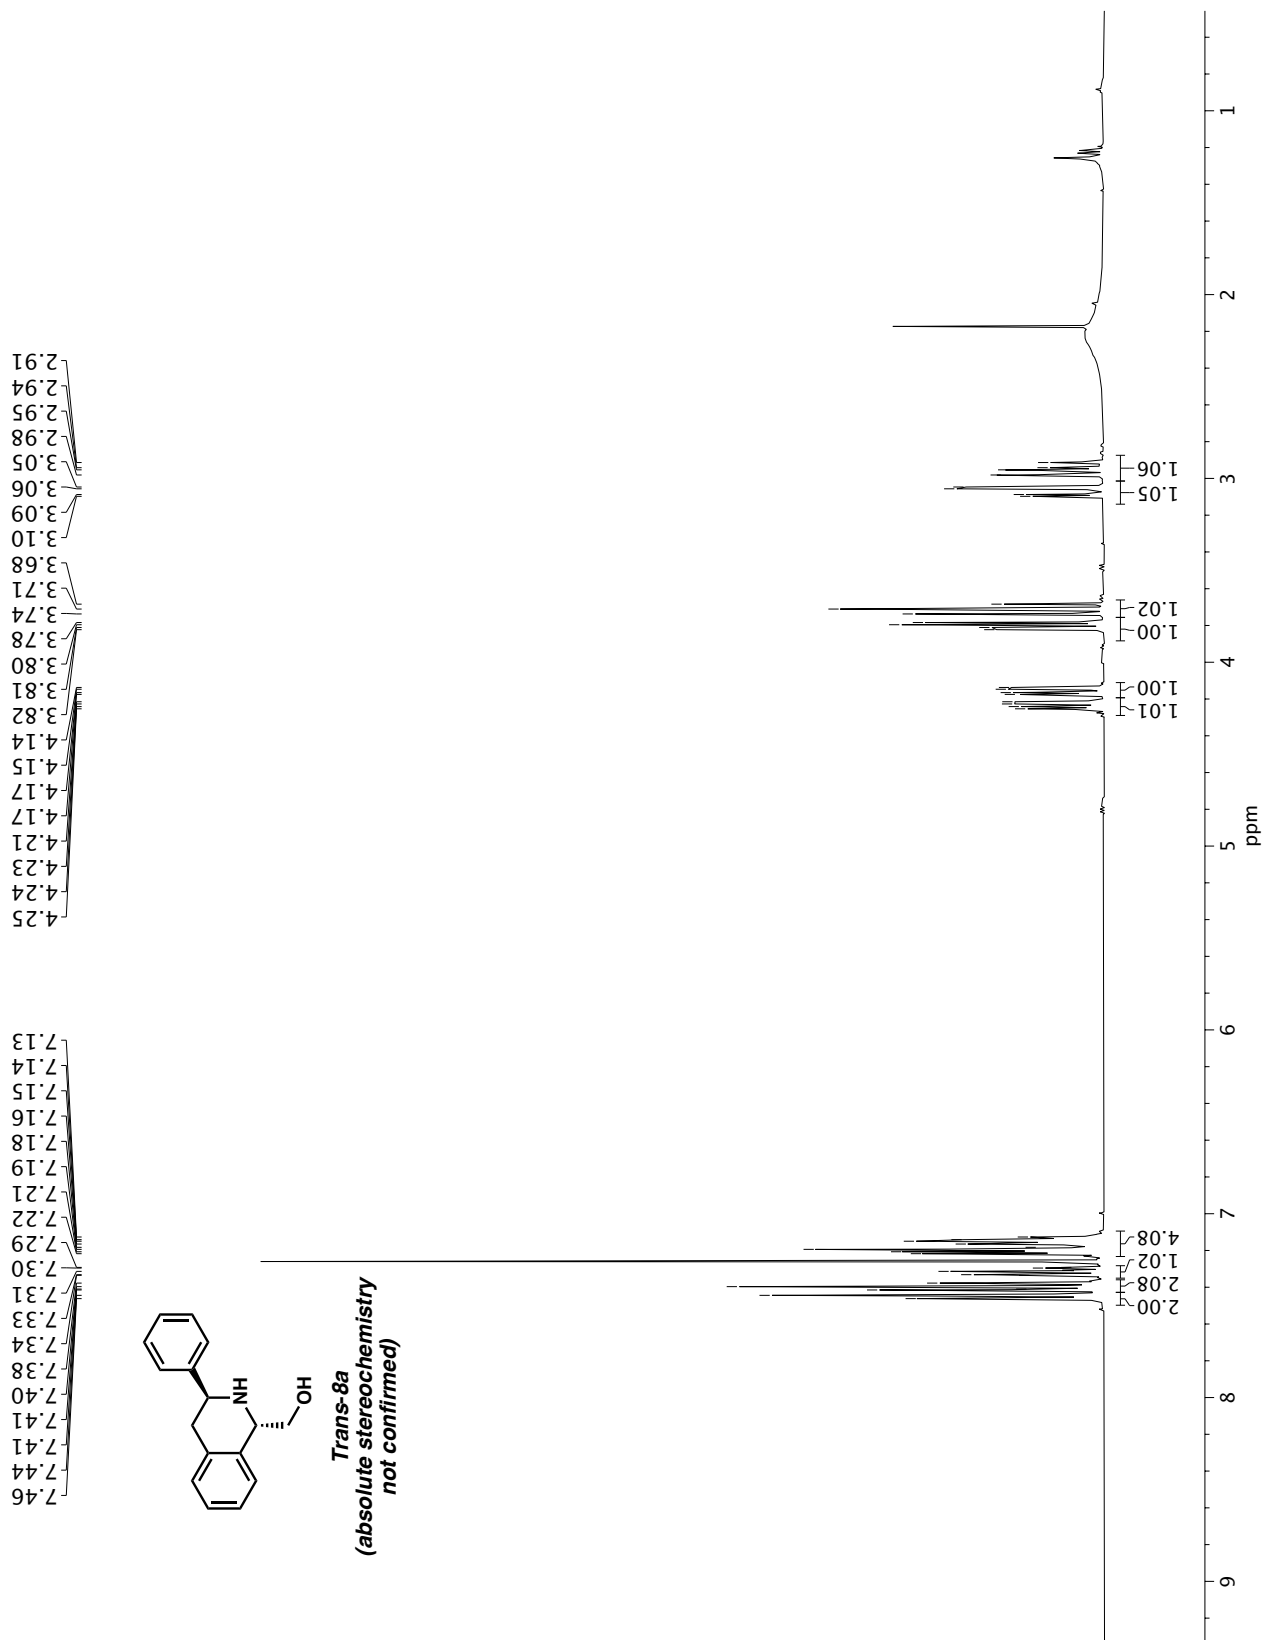

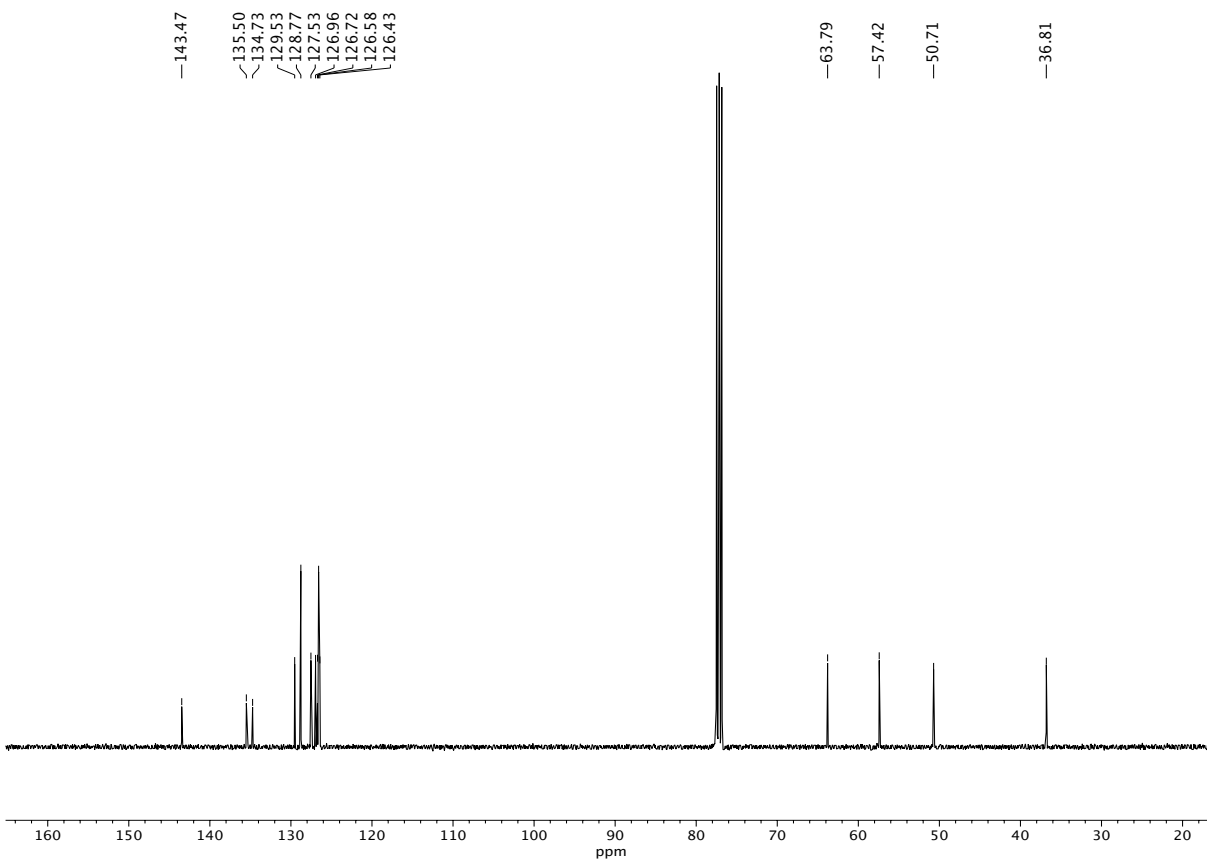

$^{13}\text{C}$  NMR (100 MHz,  $\text{CDCl}_3$ ) of compound *Trans-8a*.

<sup>1</sup>H NMR (400 MHz, CDCl<sub>3</sub>) of compound **8b**.

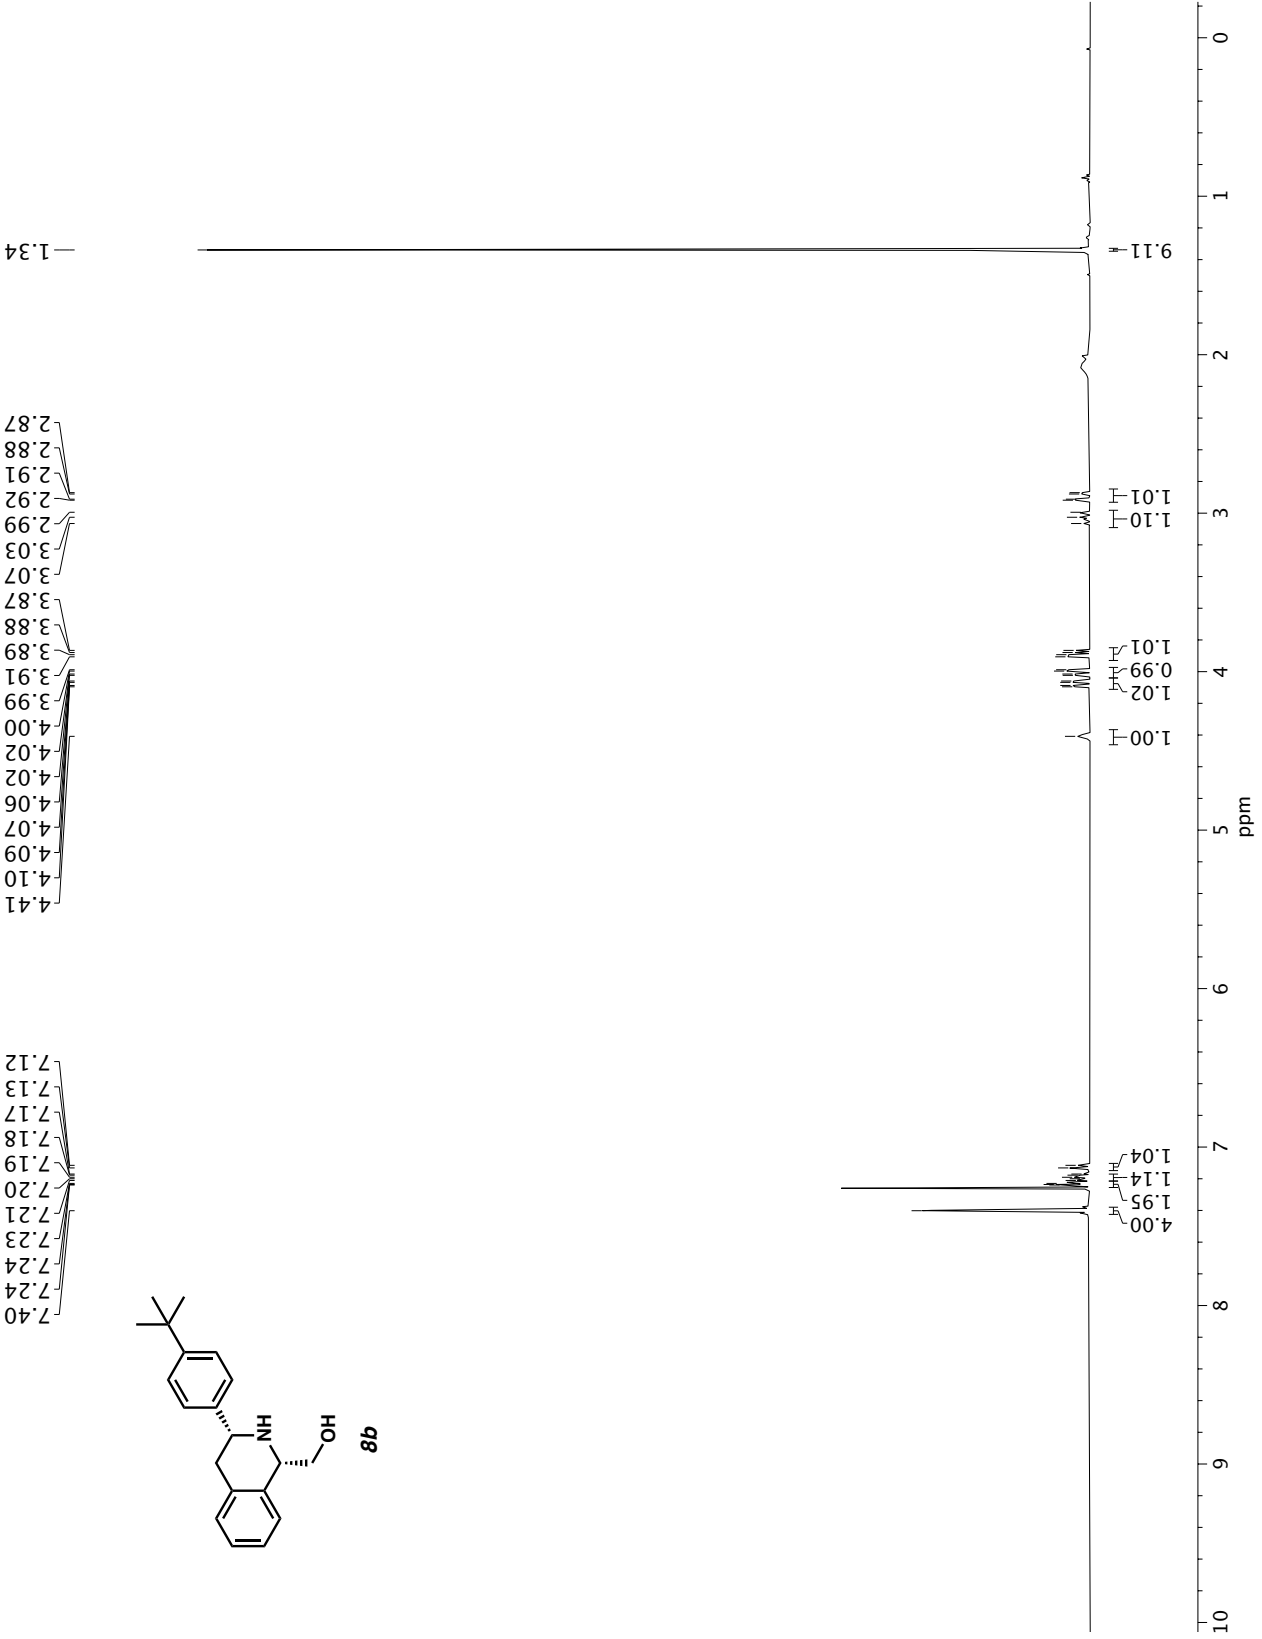

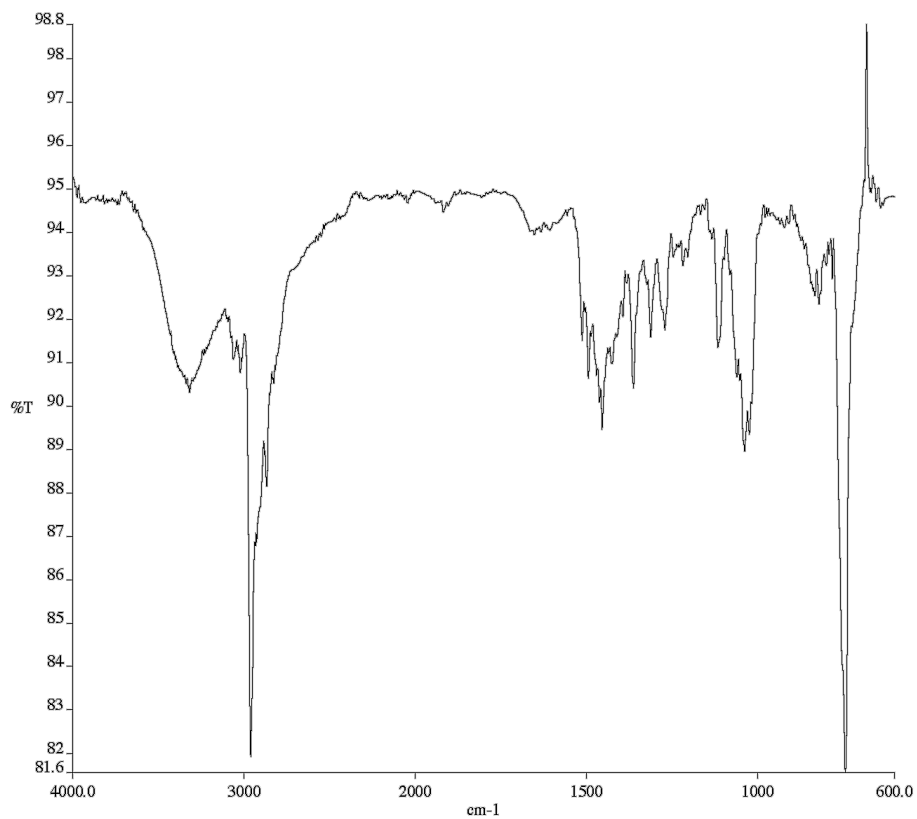

150.69      66.62      38.79  
 141.19      58.68      34.69  
 136.74      57.33      31.53  
 134.96  
 129.30  
 126.69  
 126.53  
 126.47  
 125.65  
 125.45

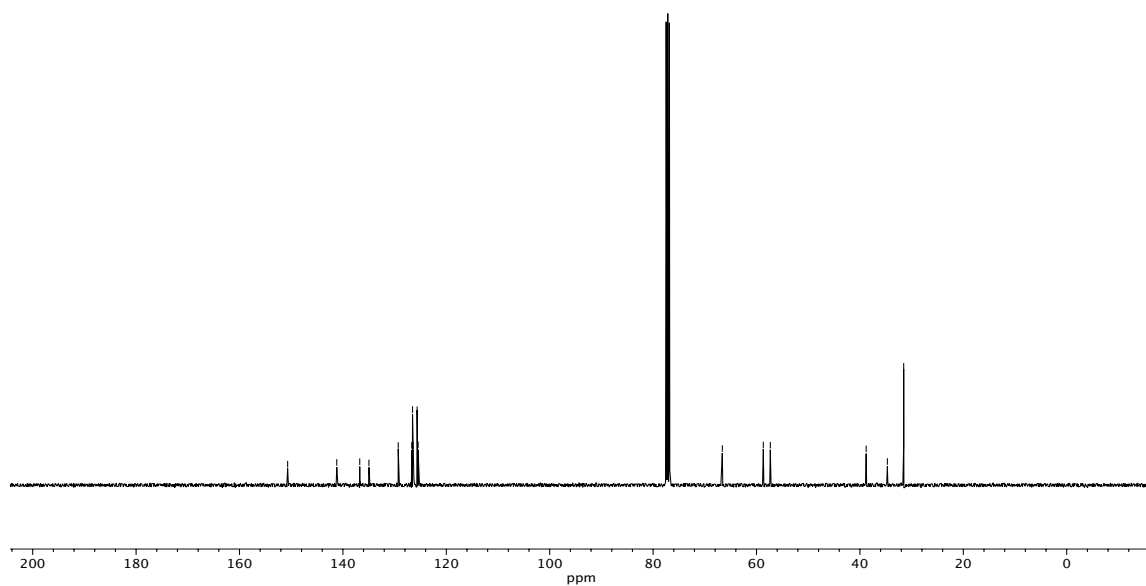

<sup>1</sup>H NMR (400 MHz, CDCl<sub>3</sub>) of compound **8c**.

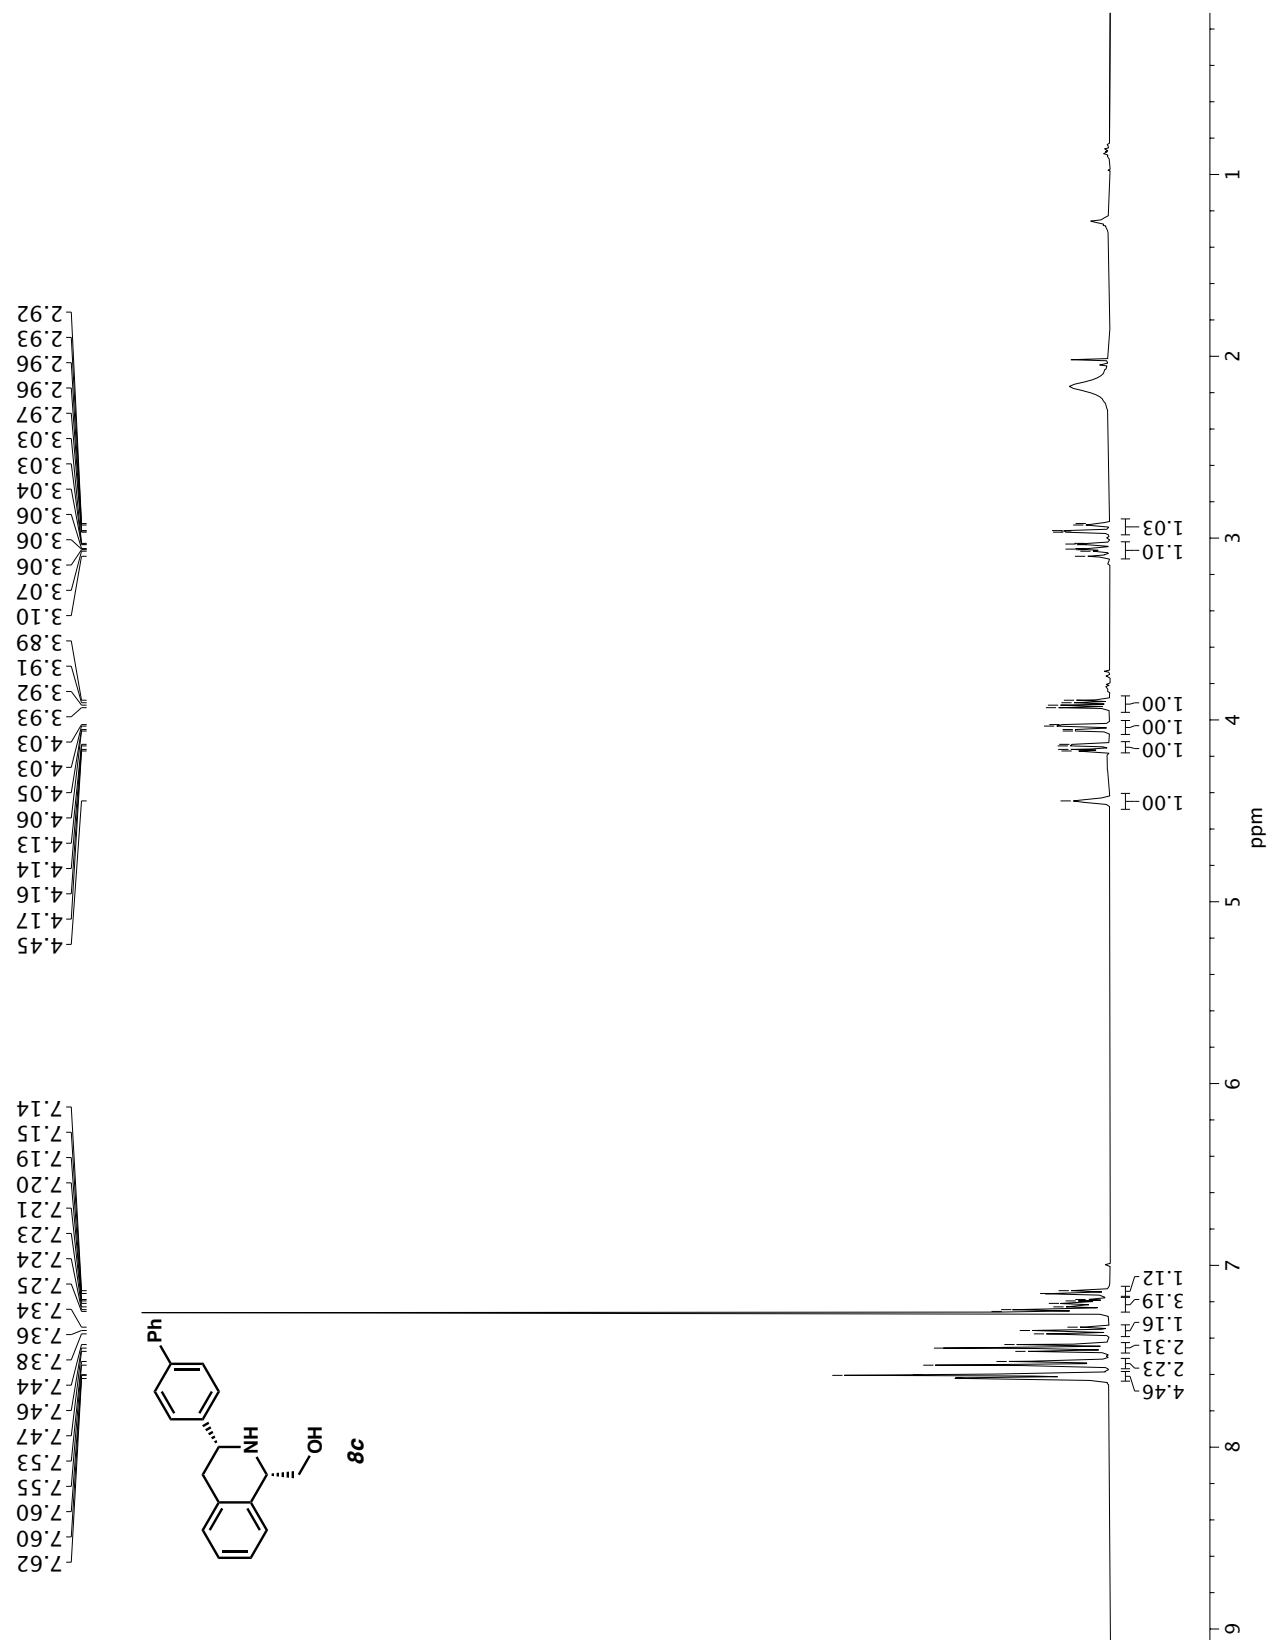

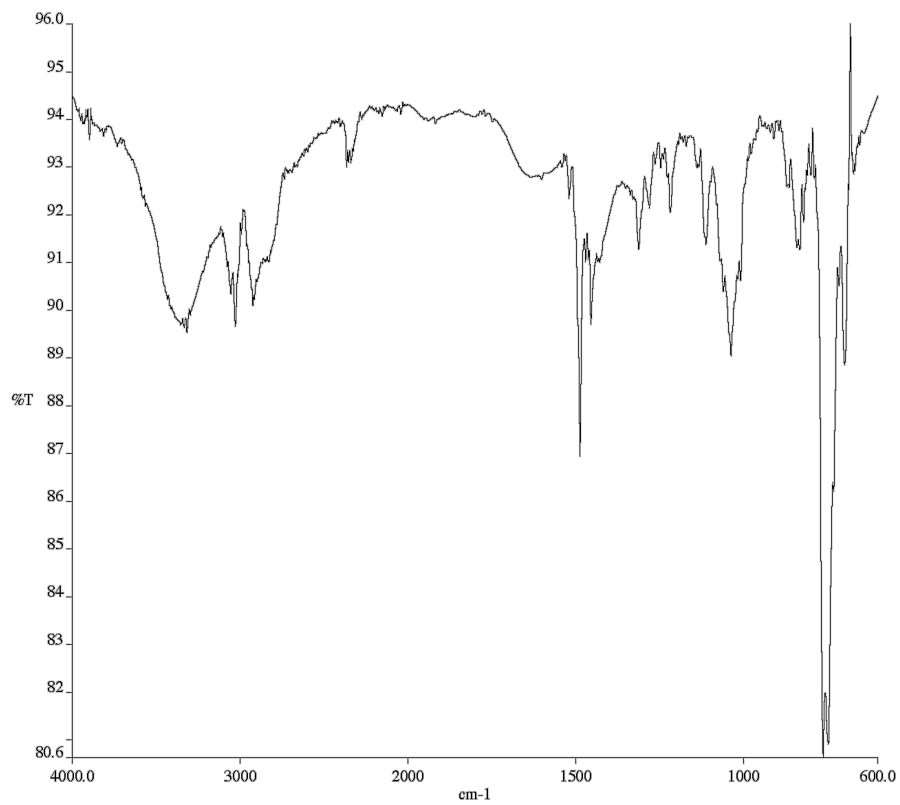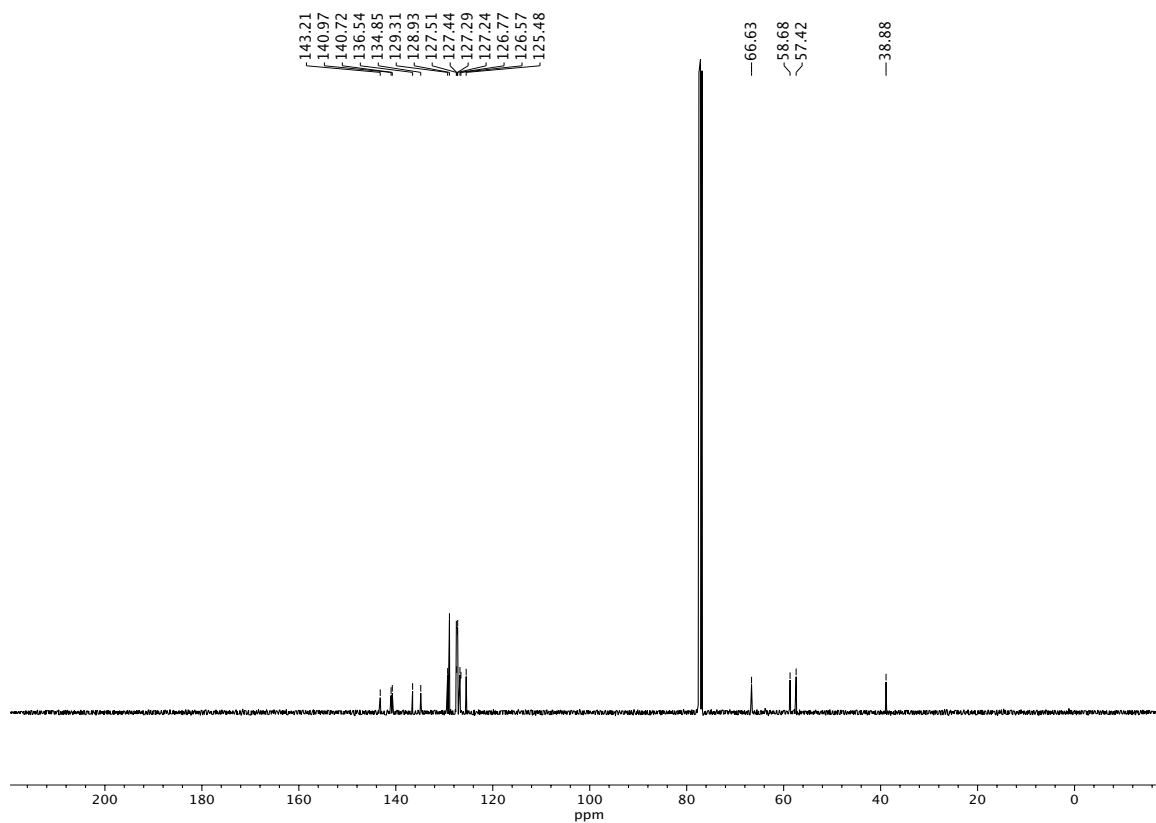



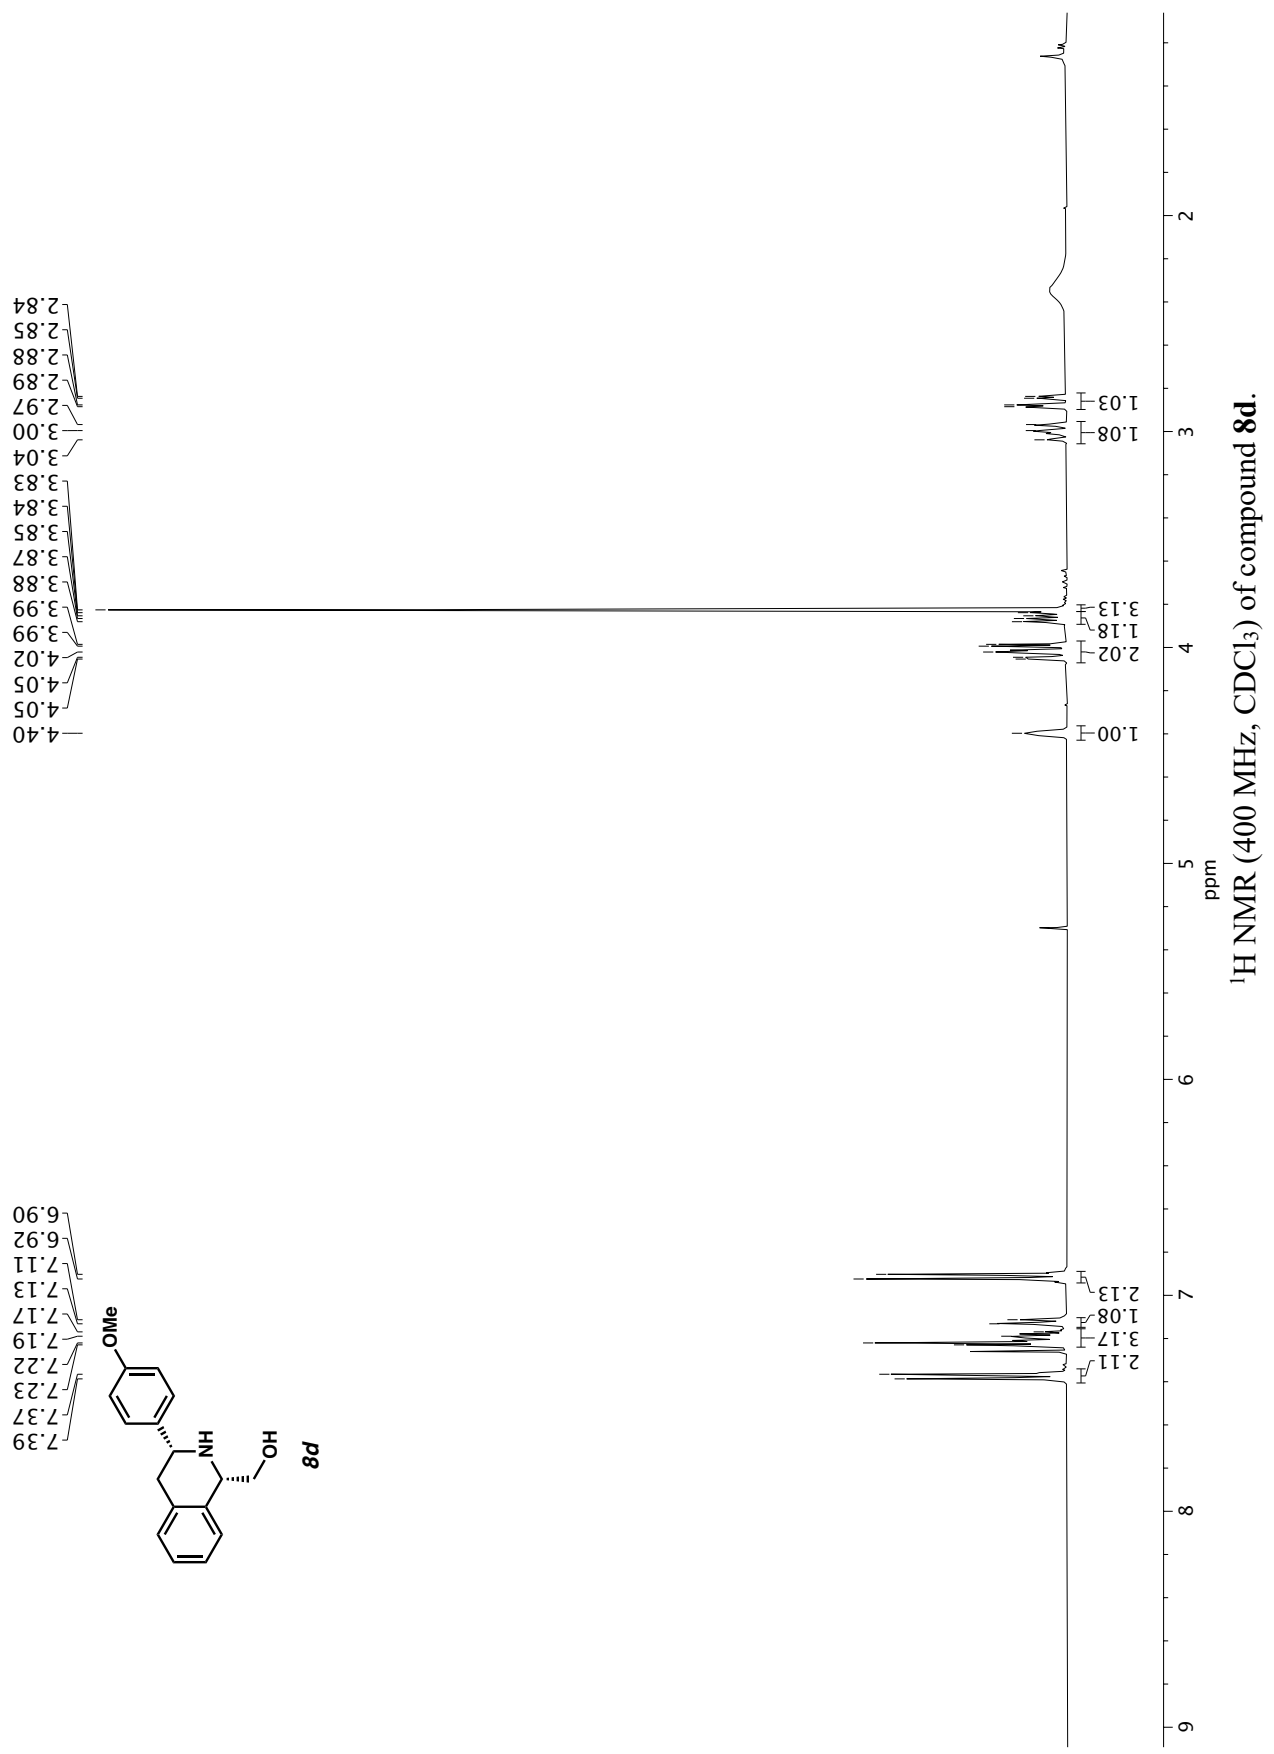

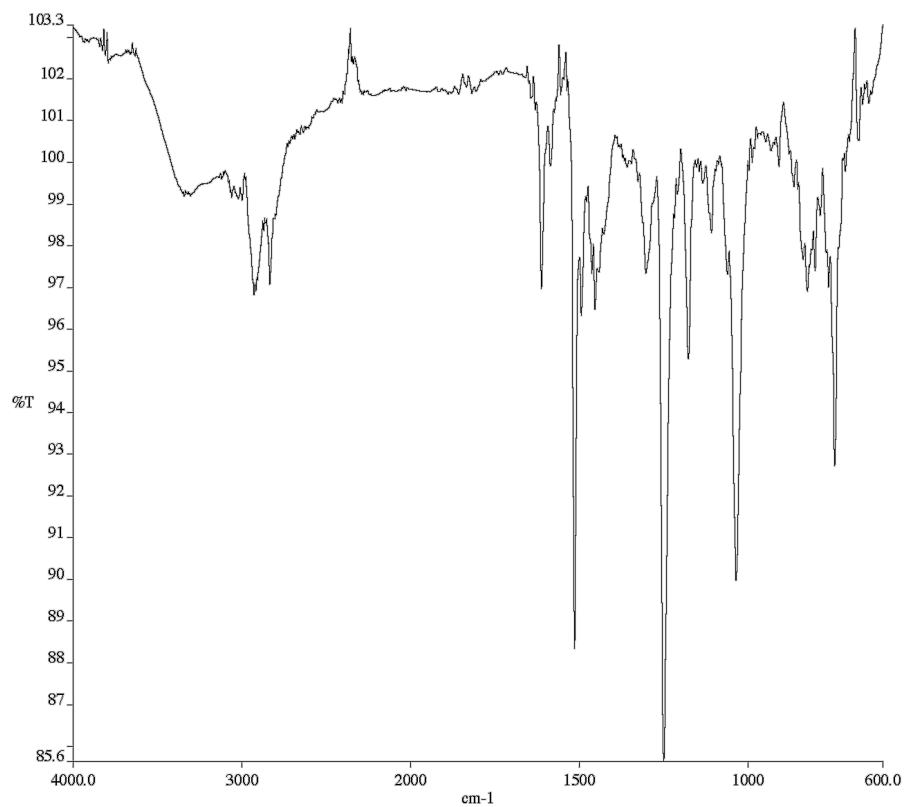

-159.03  
 136.58  
 136.30  
 134.82  
 129.17  
 127.82  
 126.56  
 126.33  
 125.32  
 -113.98  
 -66.47  
 -58.59  
 -56.96  
 -55.35  
 -38.78

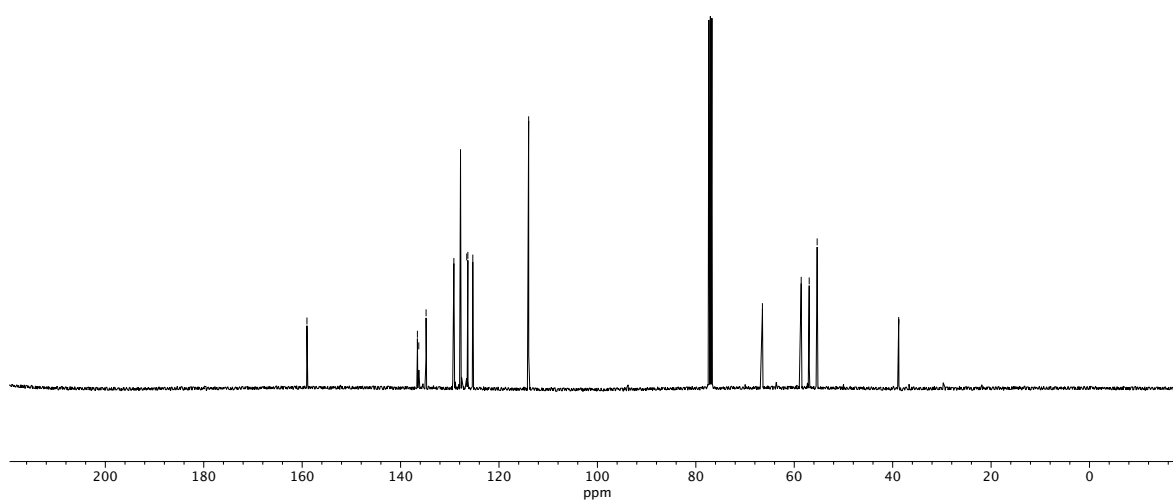

<sup>1</sup>H NMR (400 MHz, CDCl<sub>3</sub>) of compound **8e**.

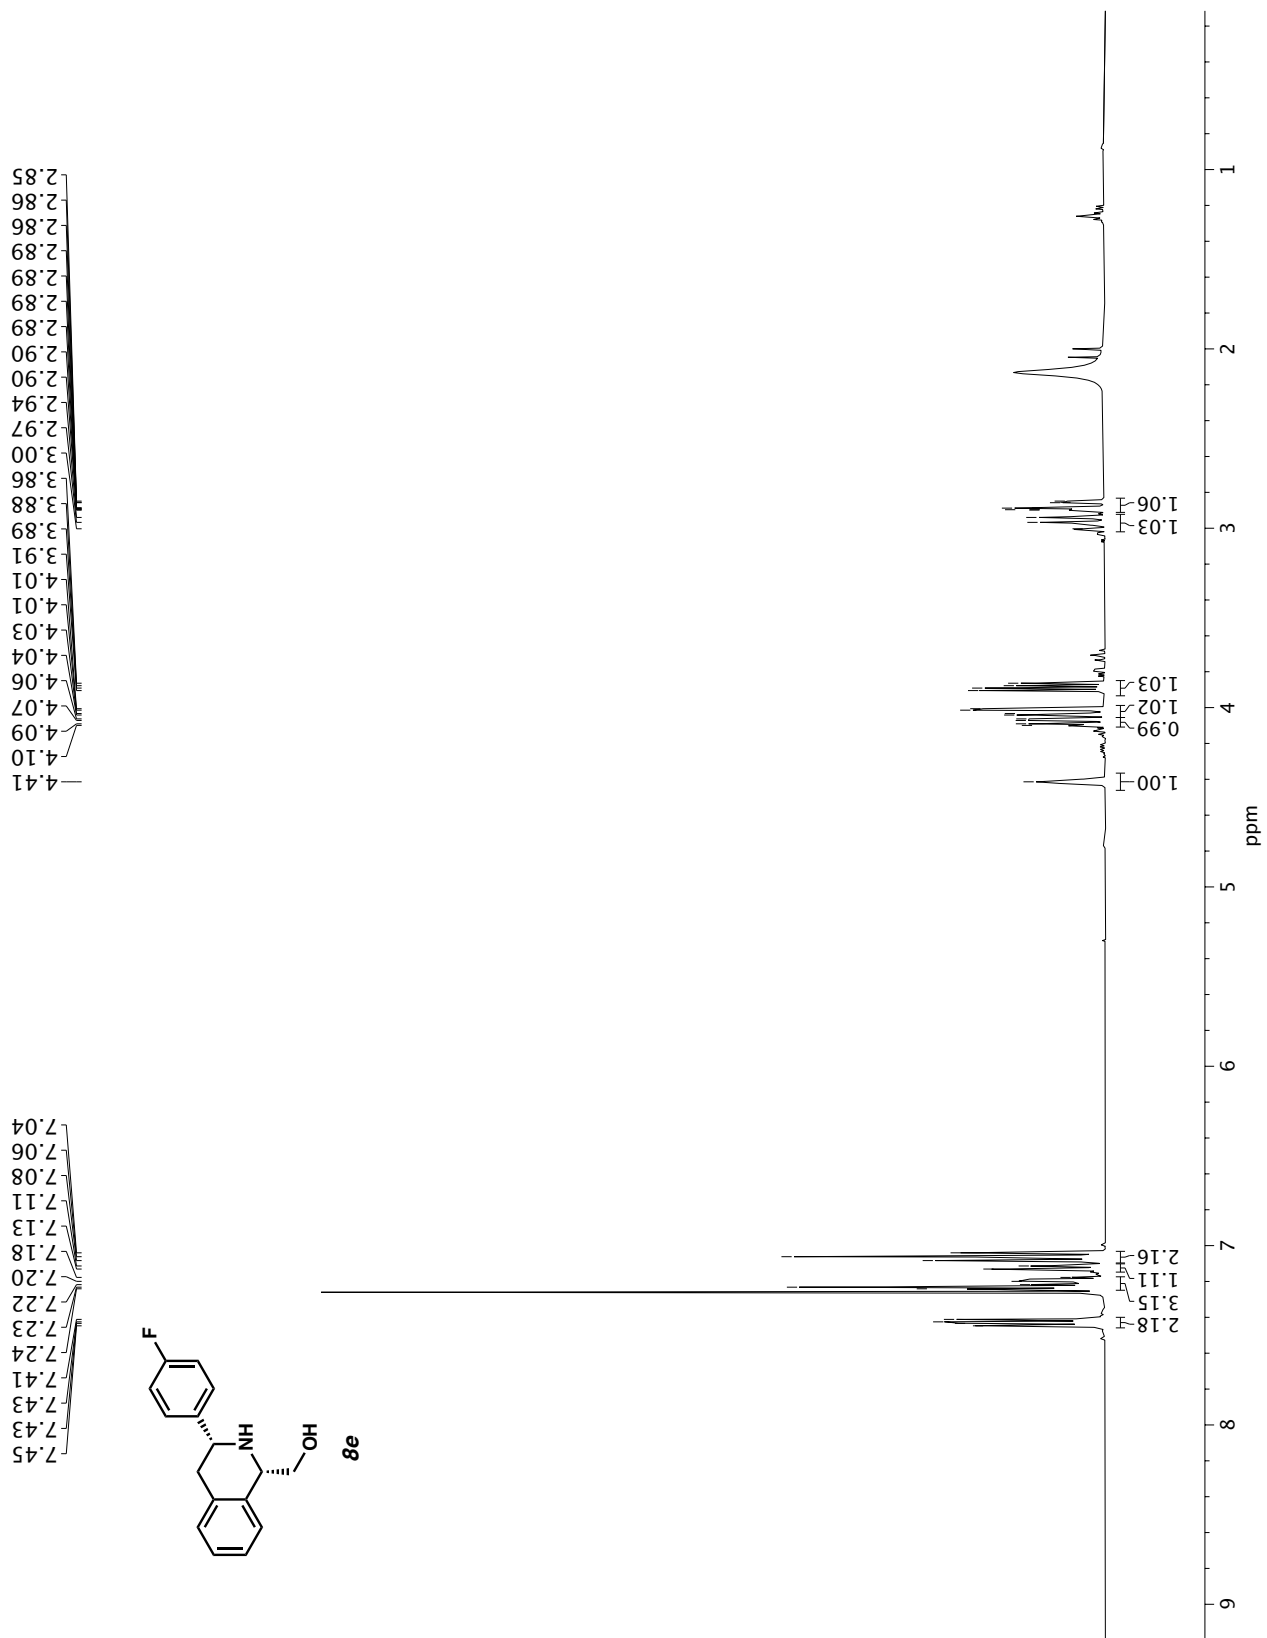

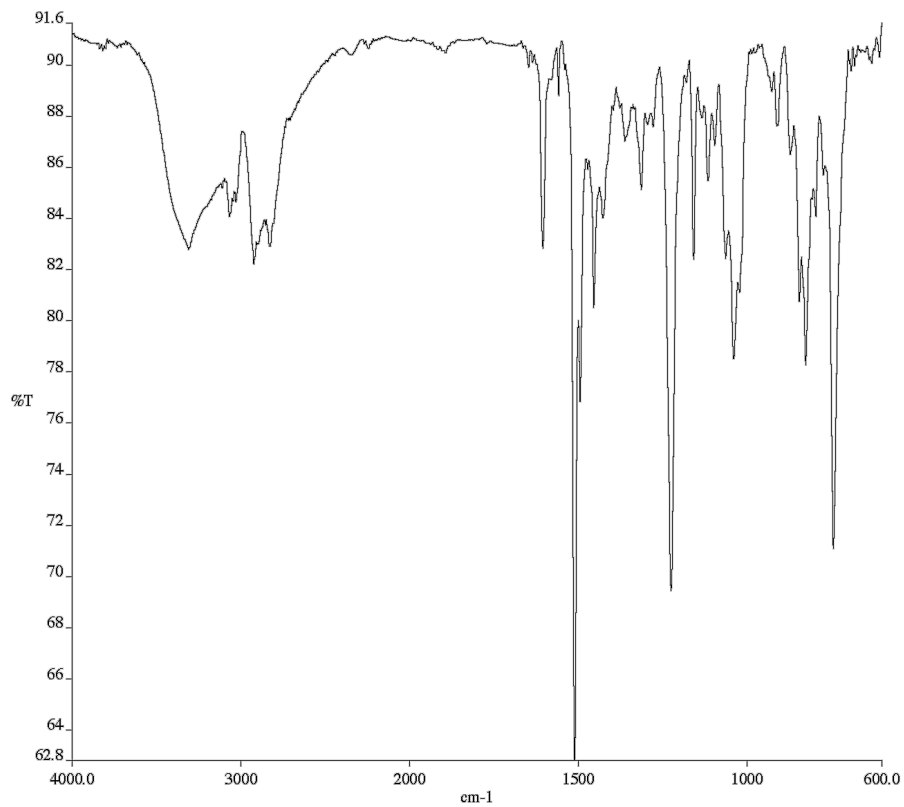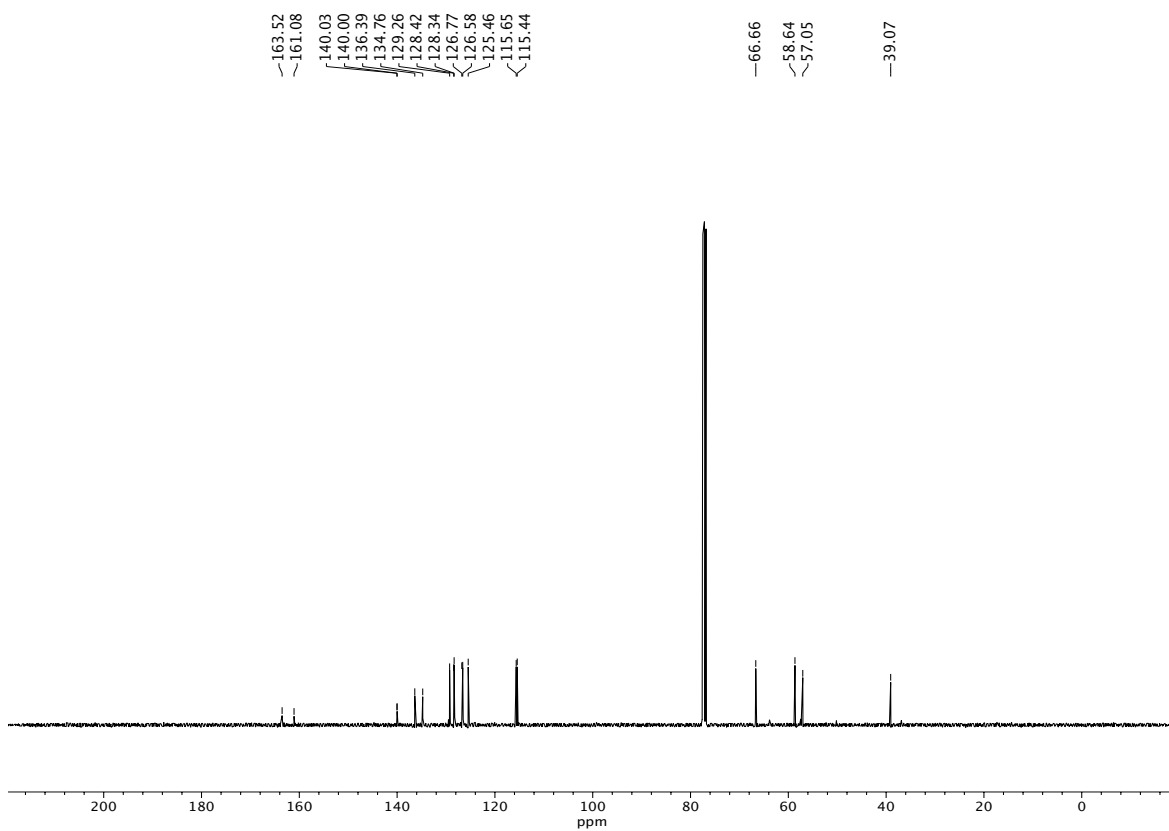

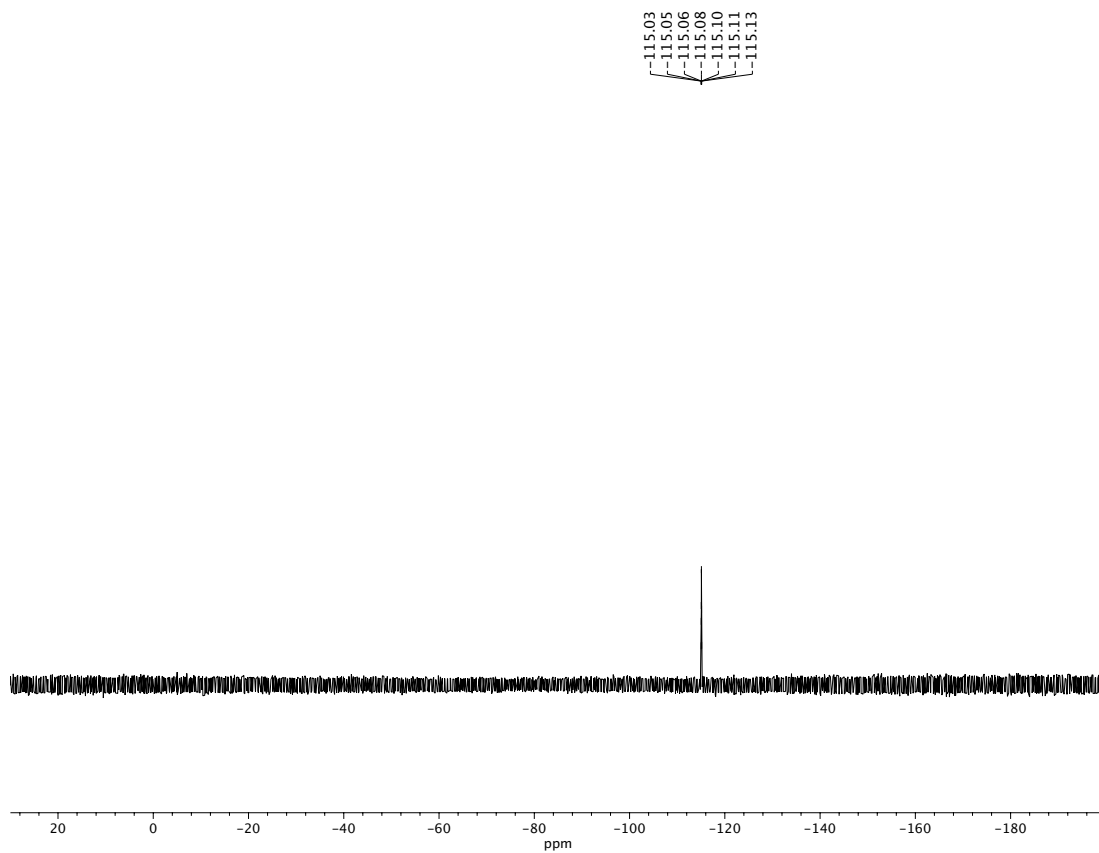

$^{19}\text{F}$  NMR (282 MHz,  $\text{CDCl}_3$ ) of **8e**.

4.35  
4.10  
4.09  
4.08  
4.07  
3.99  
3.98  
3.96  
3.95  
3.84  
3.82  
3.81  
3.79  
2.93  
2.90  
2.87  
2.86  
2.85  
2.82  
2.81

7.57  
7.55  
7.52  
7.50  
7.17  
7.16  
7.15  
7.14  
7.12  
7.11  
7.08  
7.07  
7.04

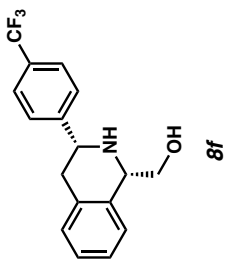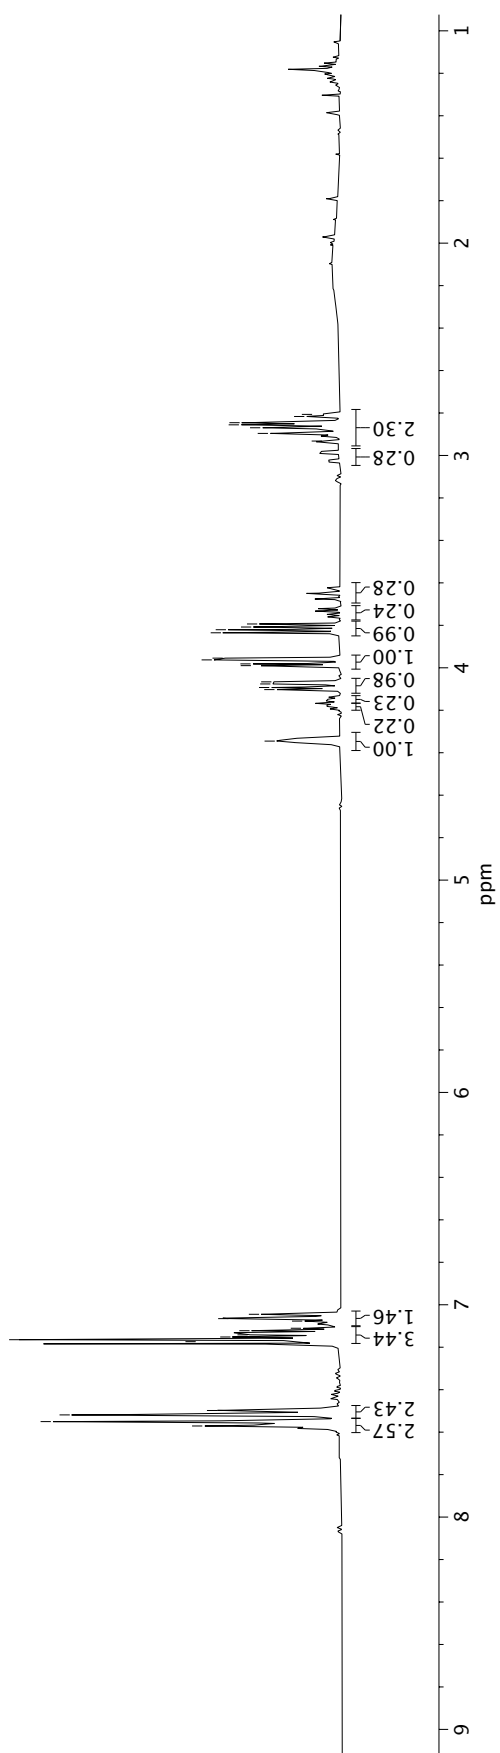

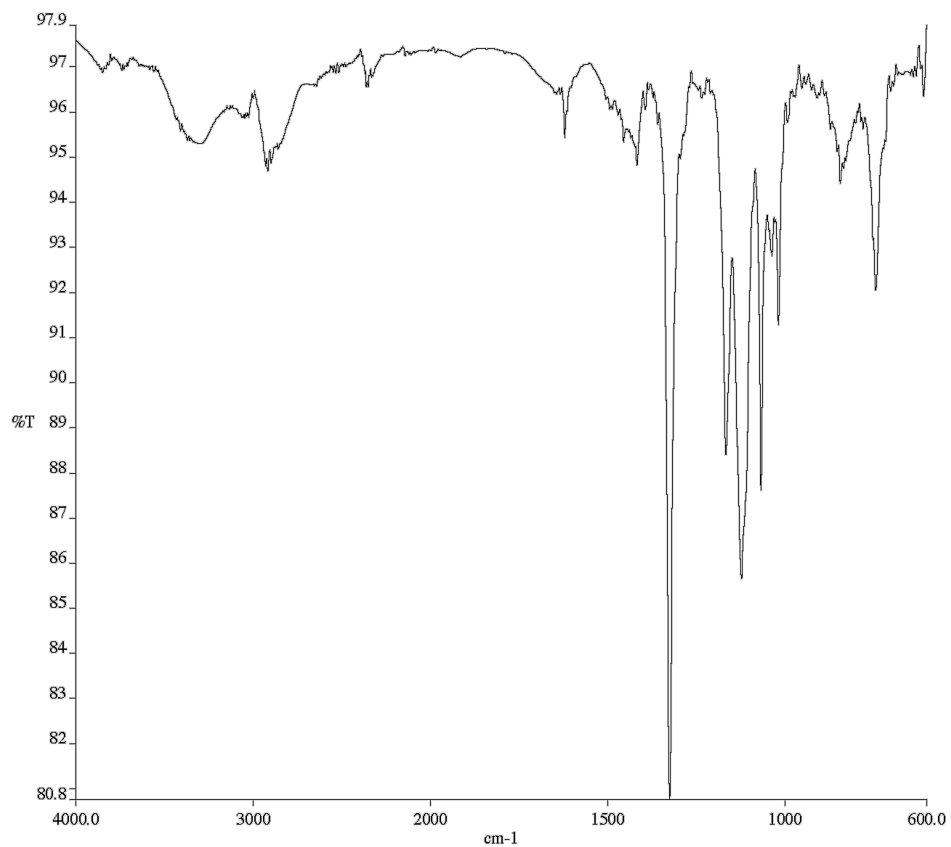

1448.25  
1336.02  
1334.69  
1330.42  
1330.10  
1297.78  
1294.46  
1292.26  
1277.18  
1267.70  
1257.76  
1257.76  
1257.73  
1257.73  
1257.71  
1256.69  
1256.69  
1256.67  
1256.65  
1256.65  
1256.63  
1256.63  
1254.46  
1229.93  
1202.22

66.68  
58.56  
57.37  
38.92

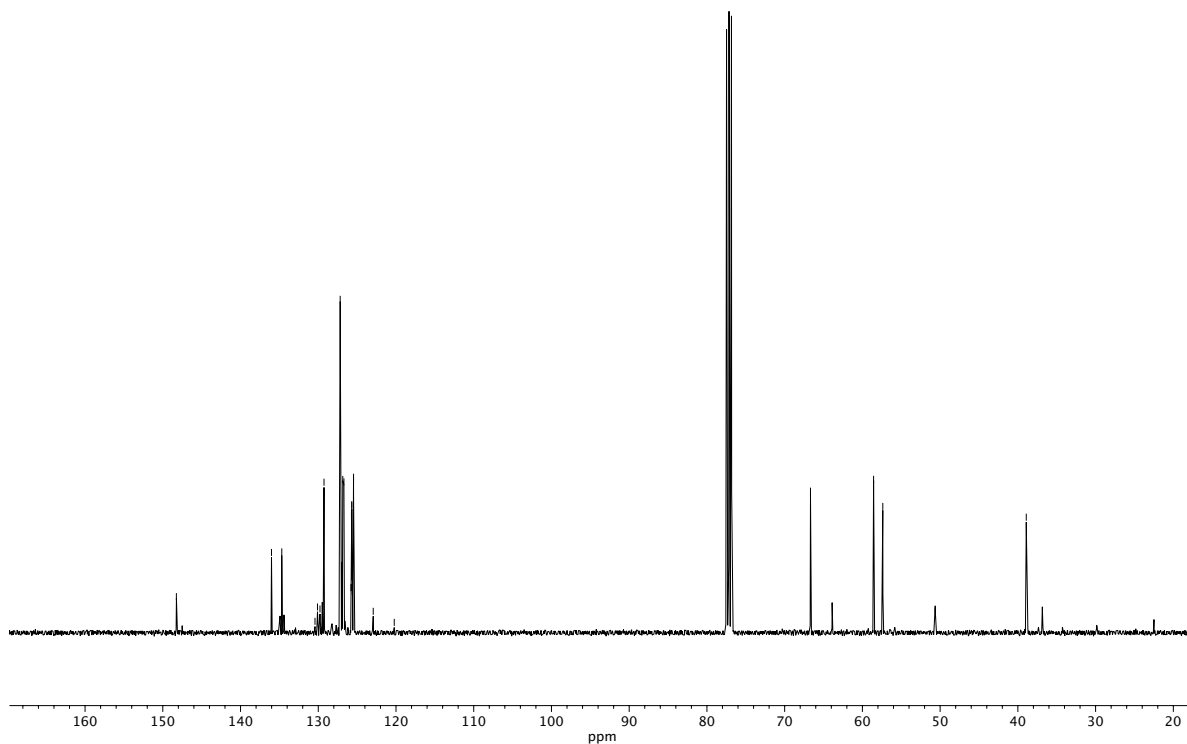

$^{13}\text{C}$  NMR (100 MHz,  $\text{CDCl}_3$ ) of compound **8f**.

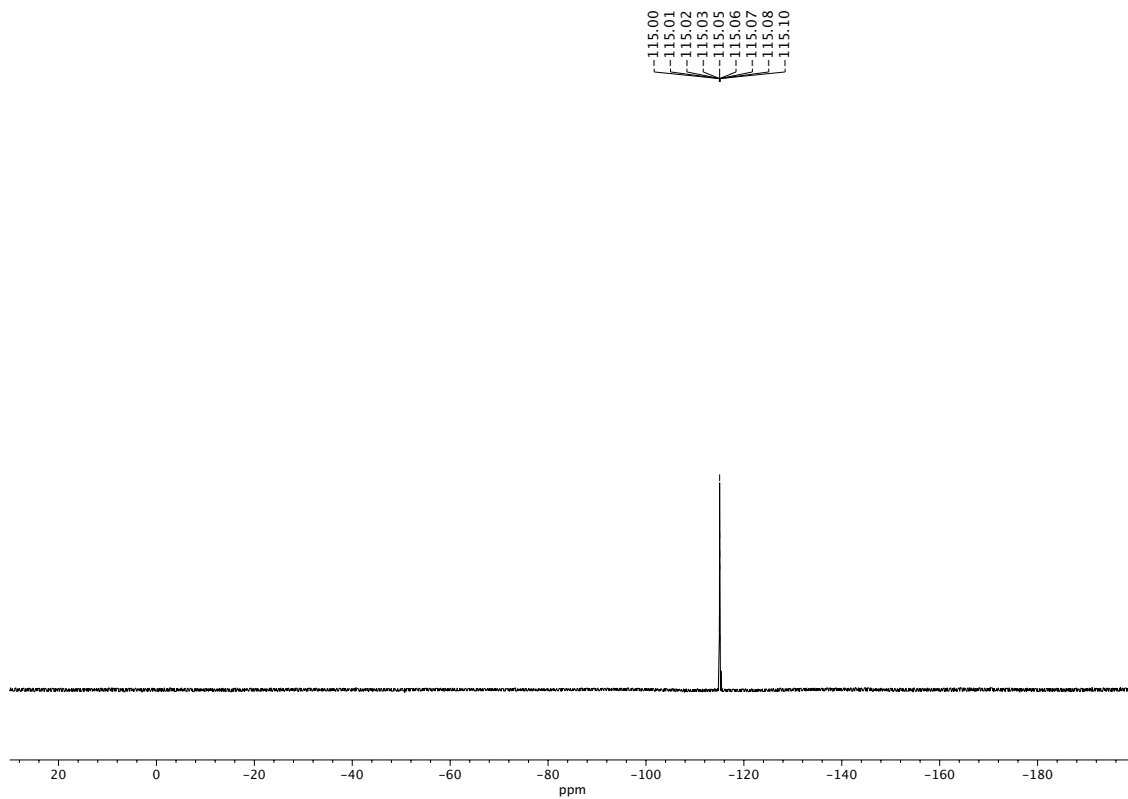

$^{19}\text{F}$  NMR (282 MHz,  $\text{CDCl}_3$ ) of **8f**.



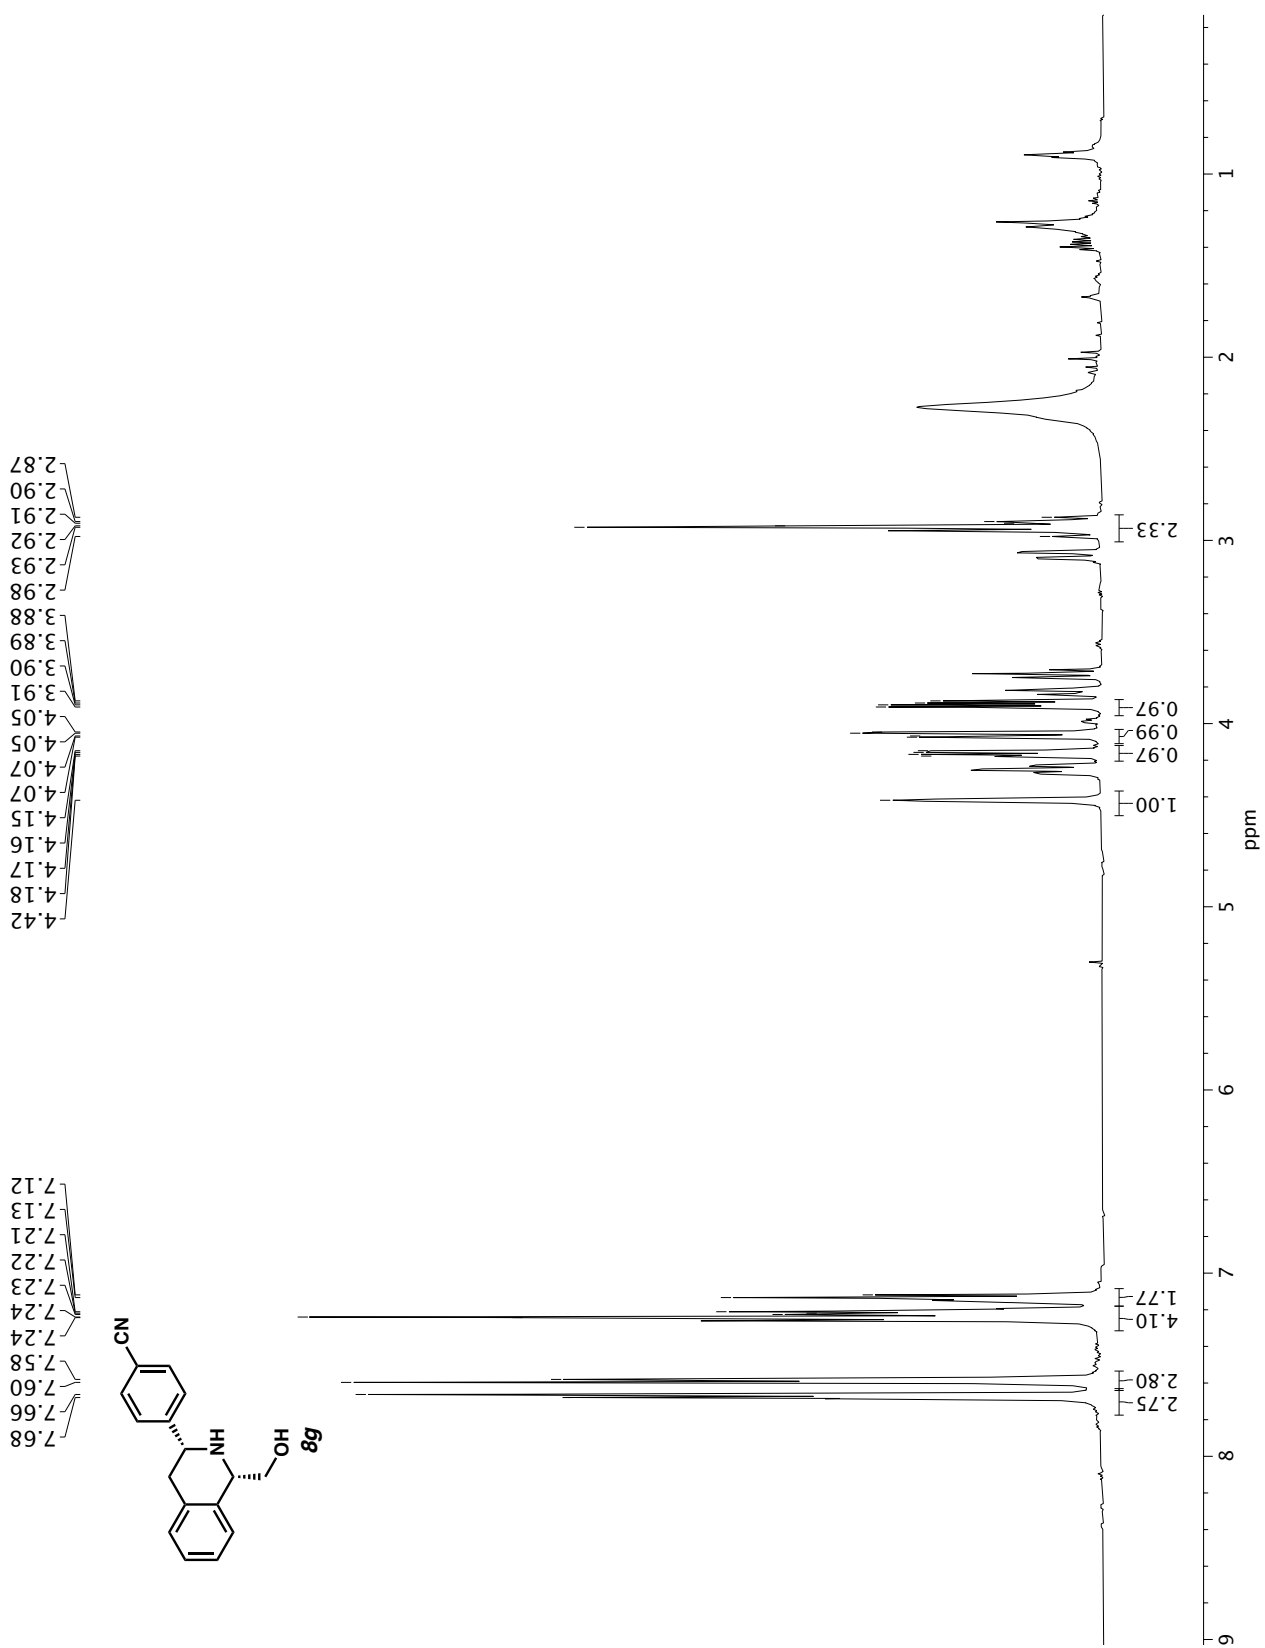

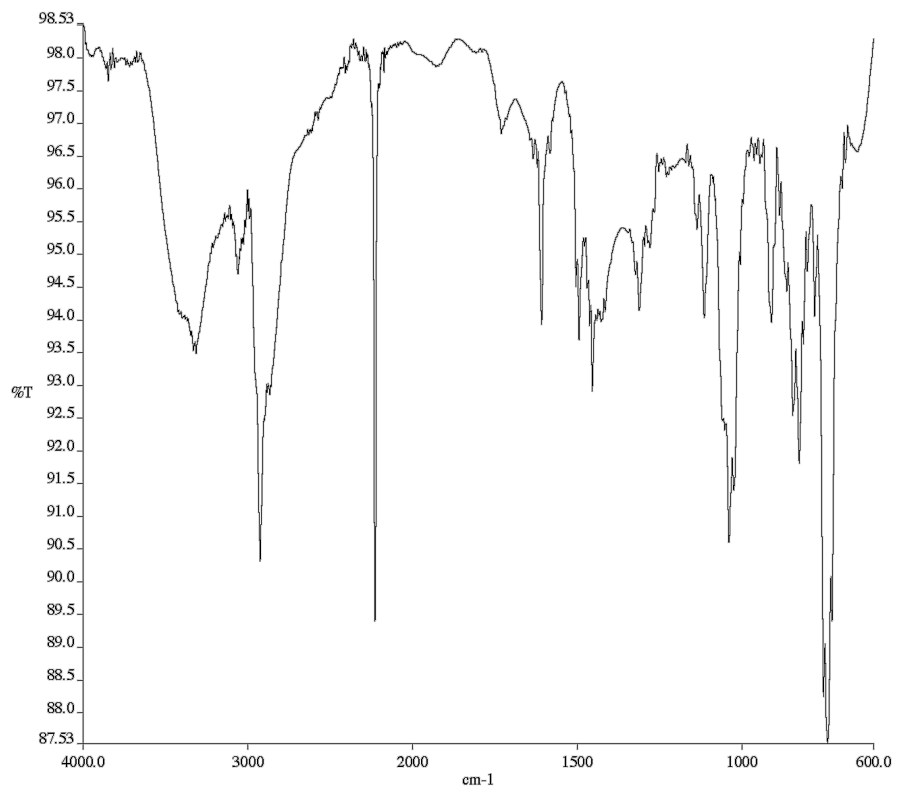

Infrared spectrum (Thin Film, NaCl) of compound **8g**.

—149.58  
 /135.69  
 /134.54  
 /132.63  
 /129.23  
 /127.62  
 /126.92  
 /126.80  
 /125.47  
 —118.94  
 —111.51  
 —66.68  
 ~58.50  
 ~57.42  
 —38.81

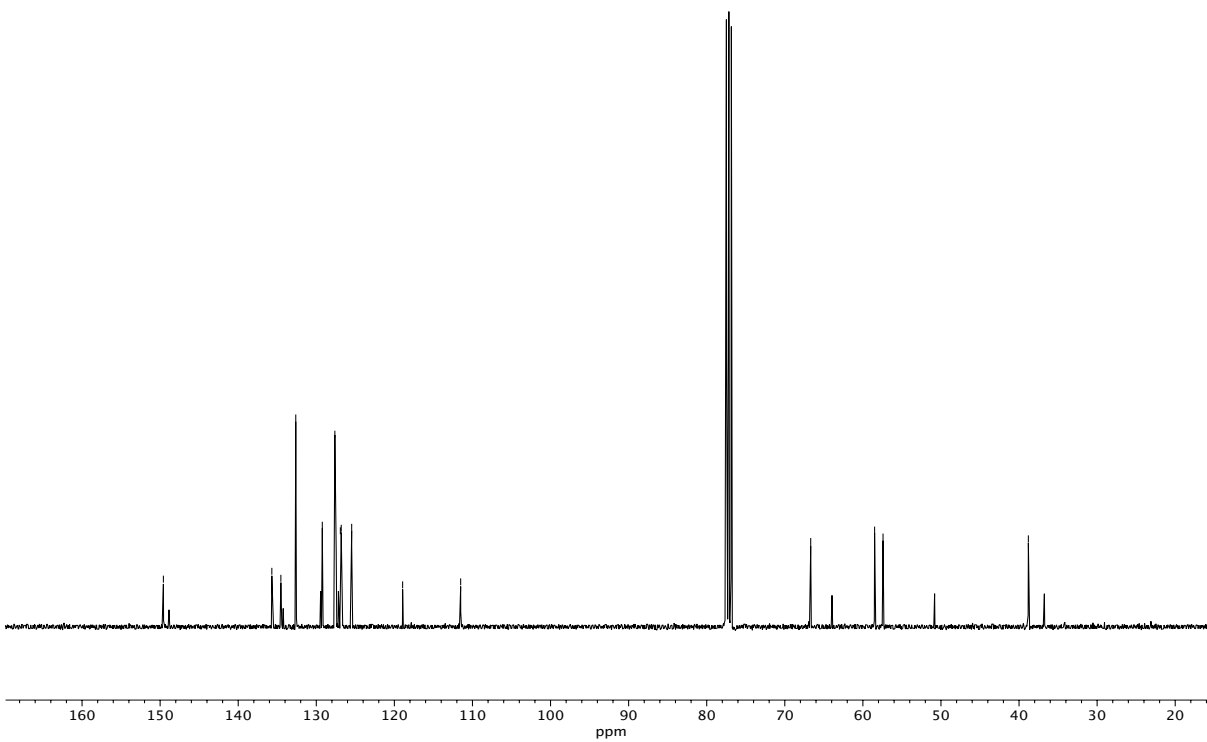

$^{13}\text{C}$  NMR (100 MHz,  $\text{CDCl}_3$ ) of compound **8g**.

<sup>1</sup>H NMR (400 MHz, CDCl<sub>3</sub>) of compound **8h**.

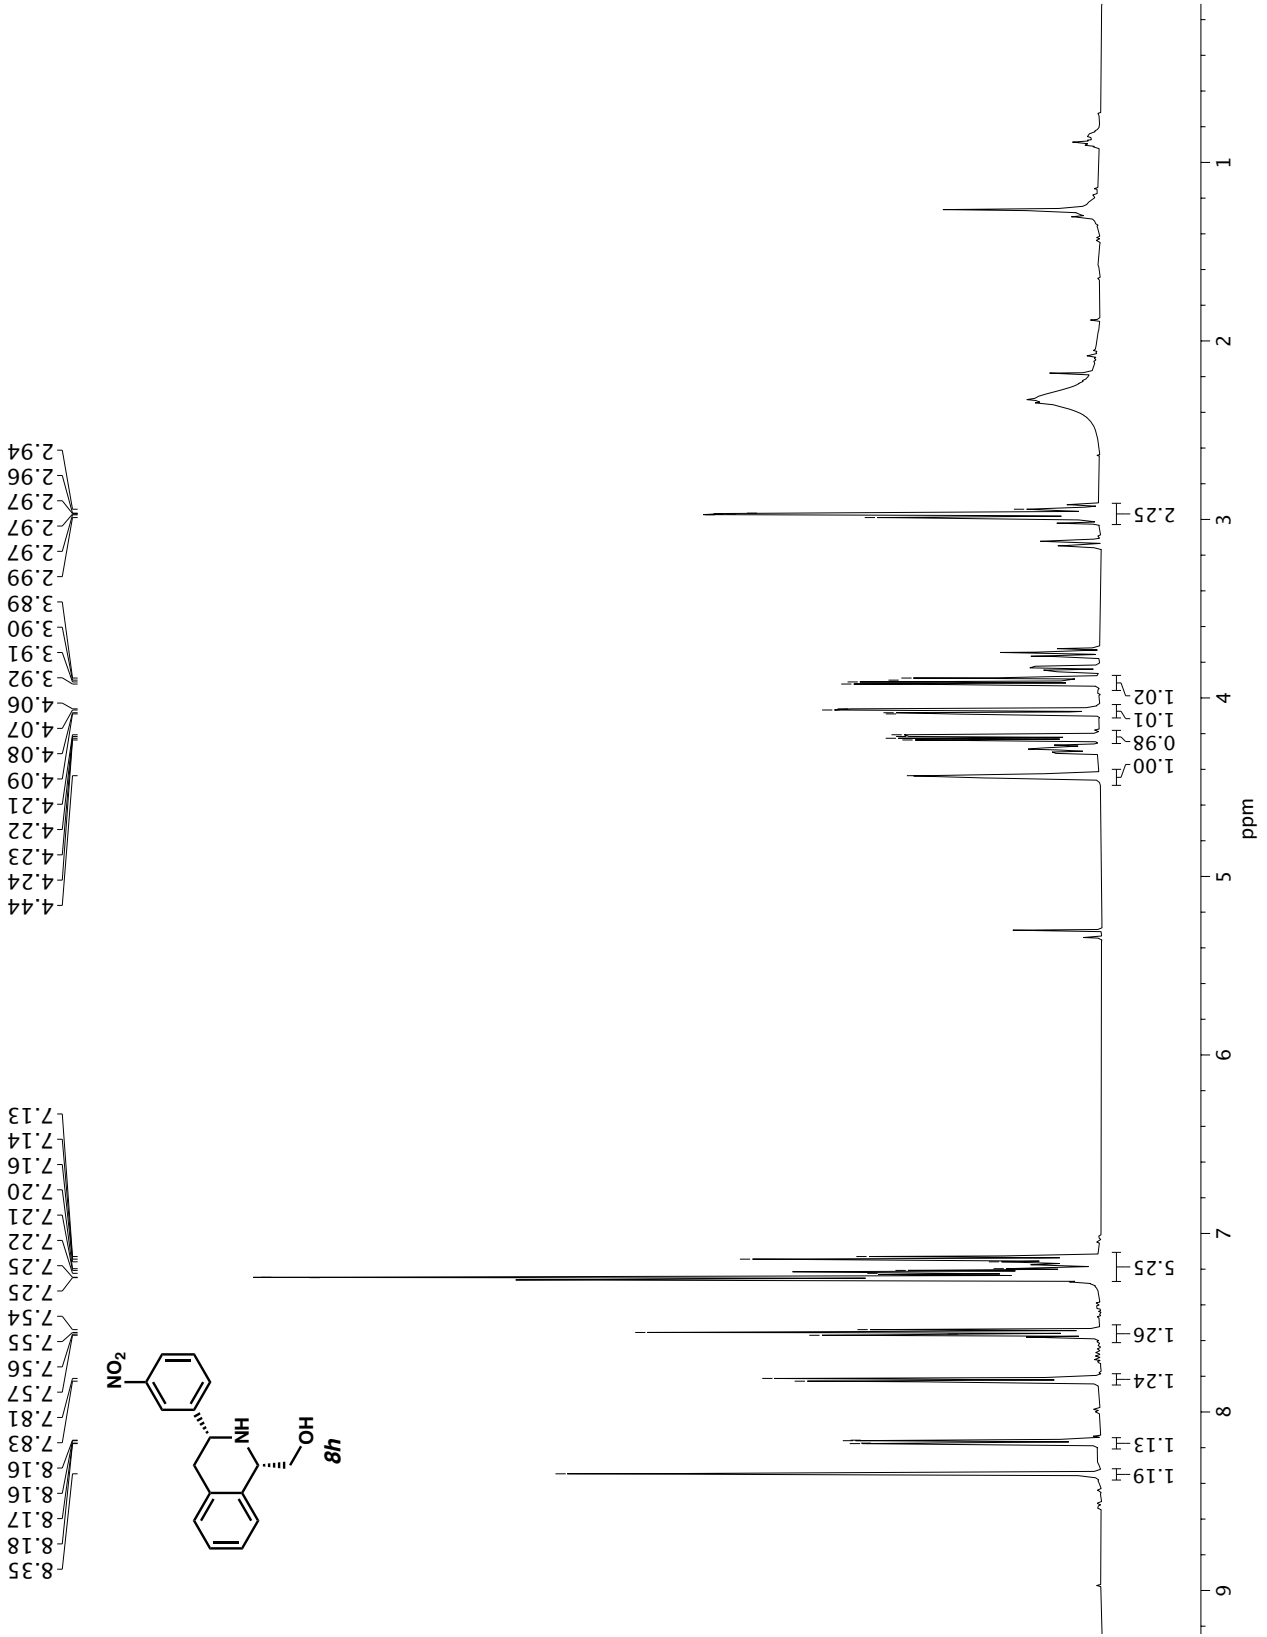

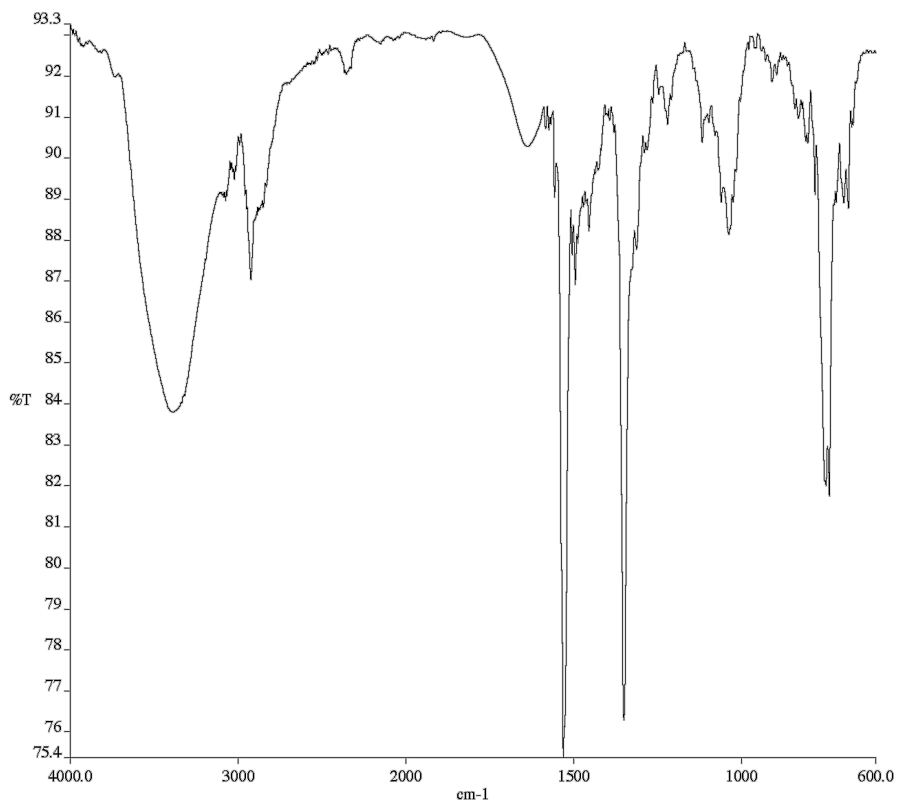

148.71  
 146.48  
 135.73  
 134.64  
 133.24  
 129.81  
 129.36  
 127.02  
 126.91  
 125.57  
 122.85  
 121.99

66.79  
 58.69  
 57.16  
 38.93

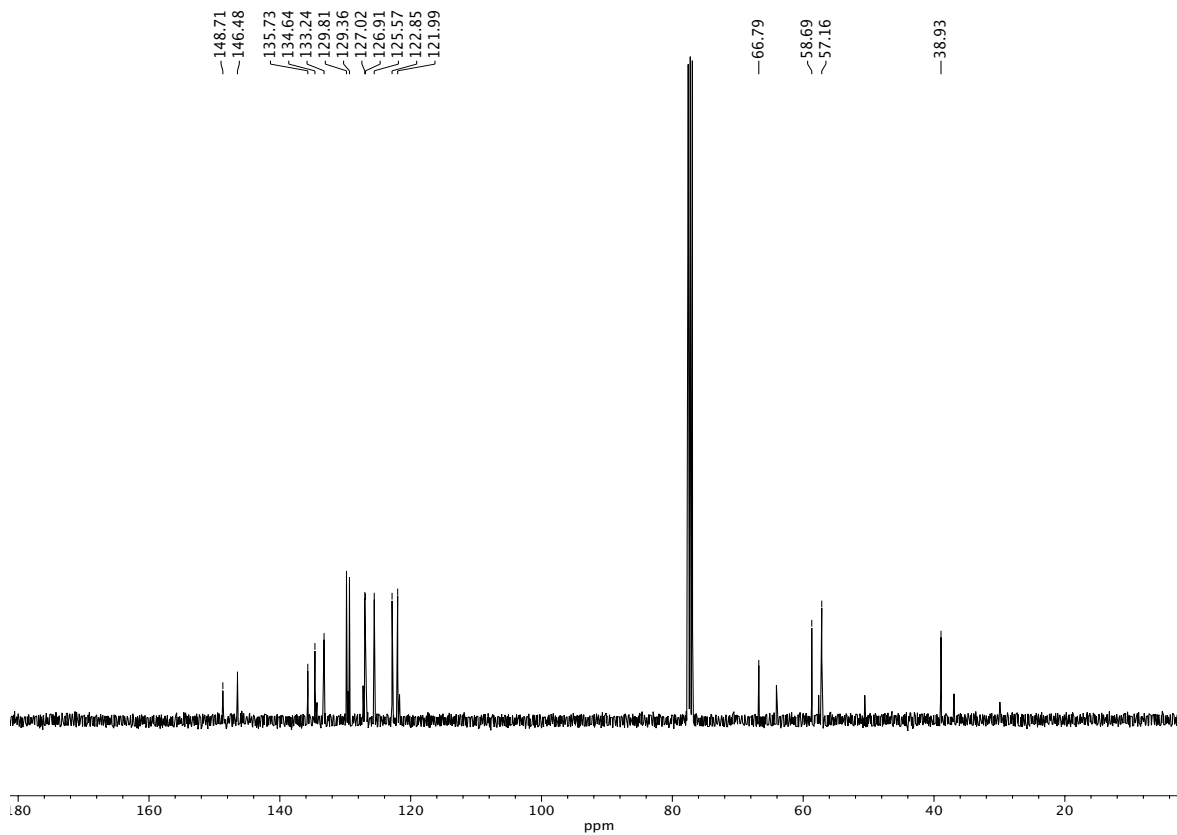

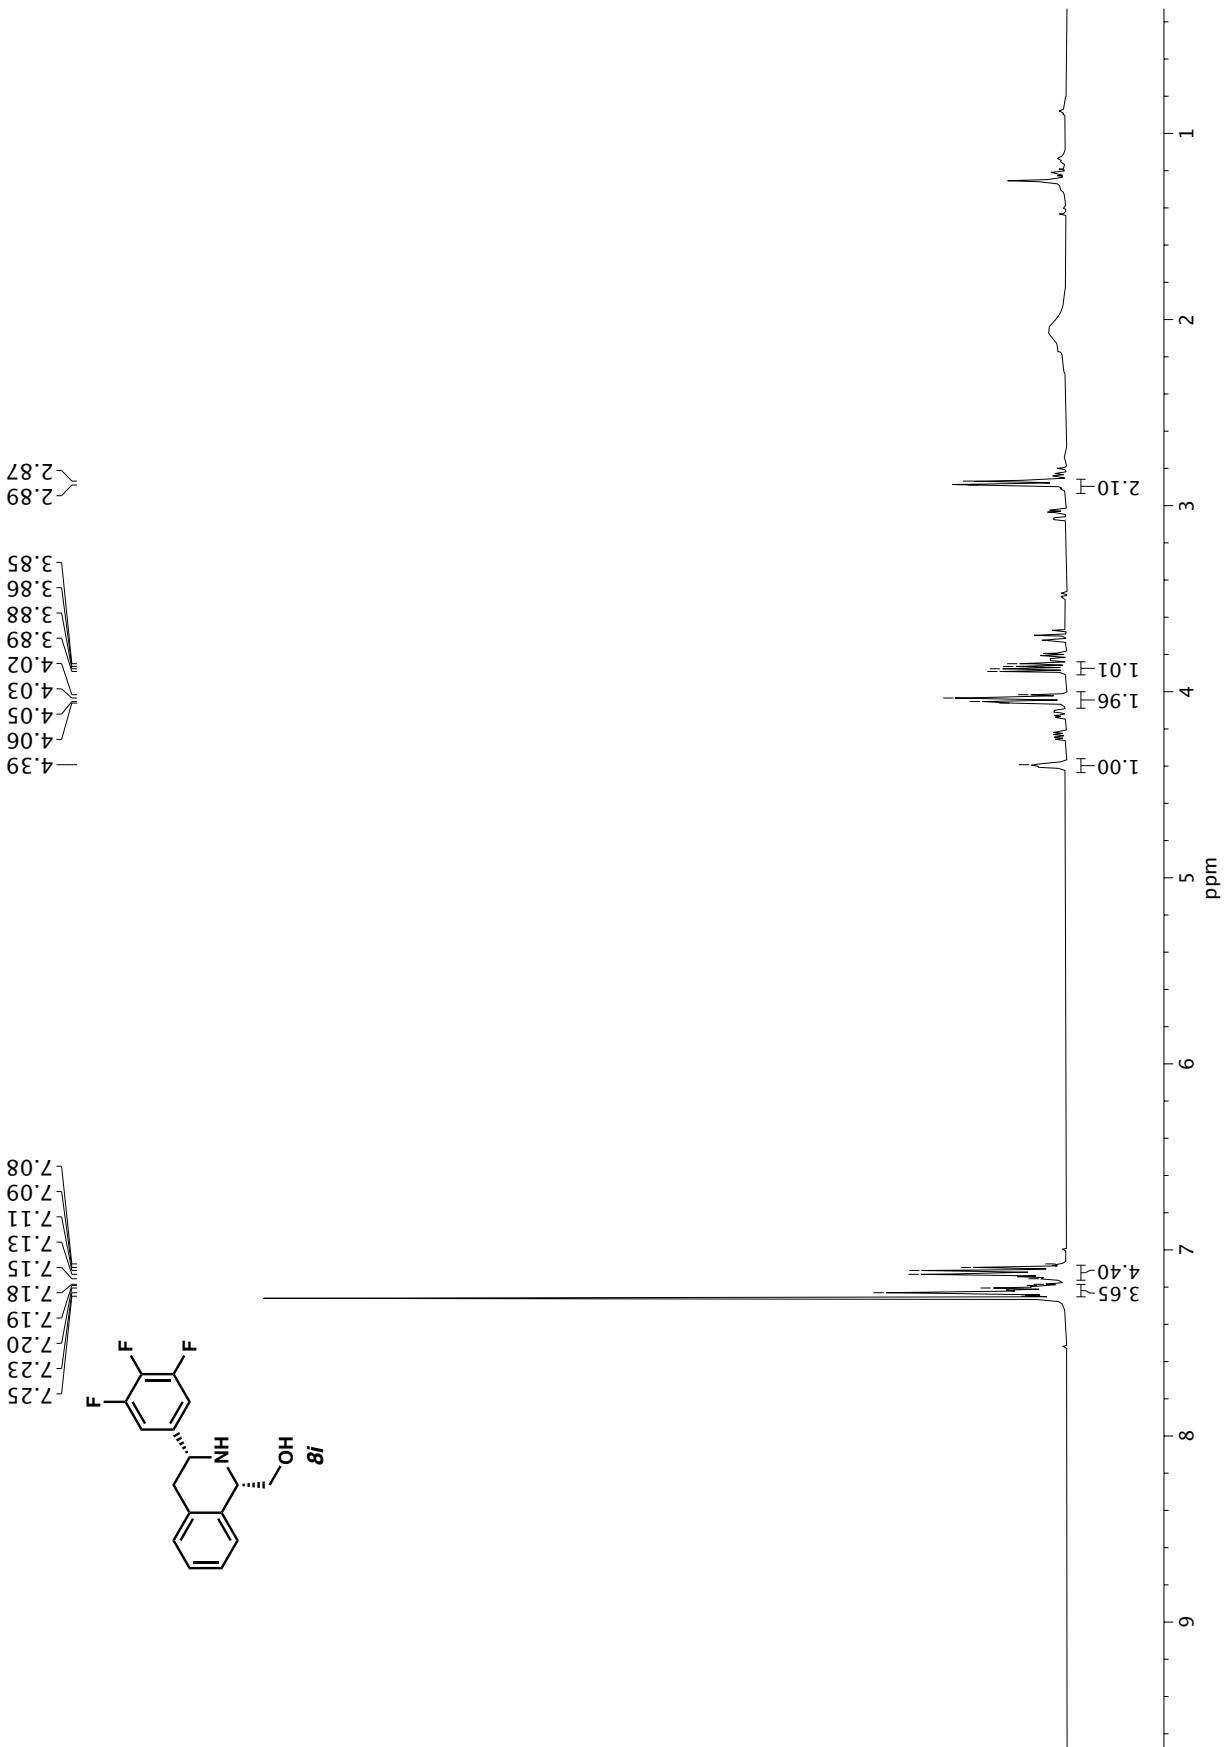

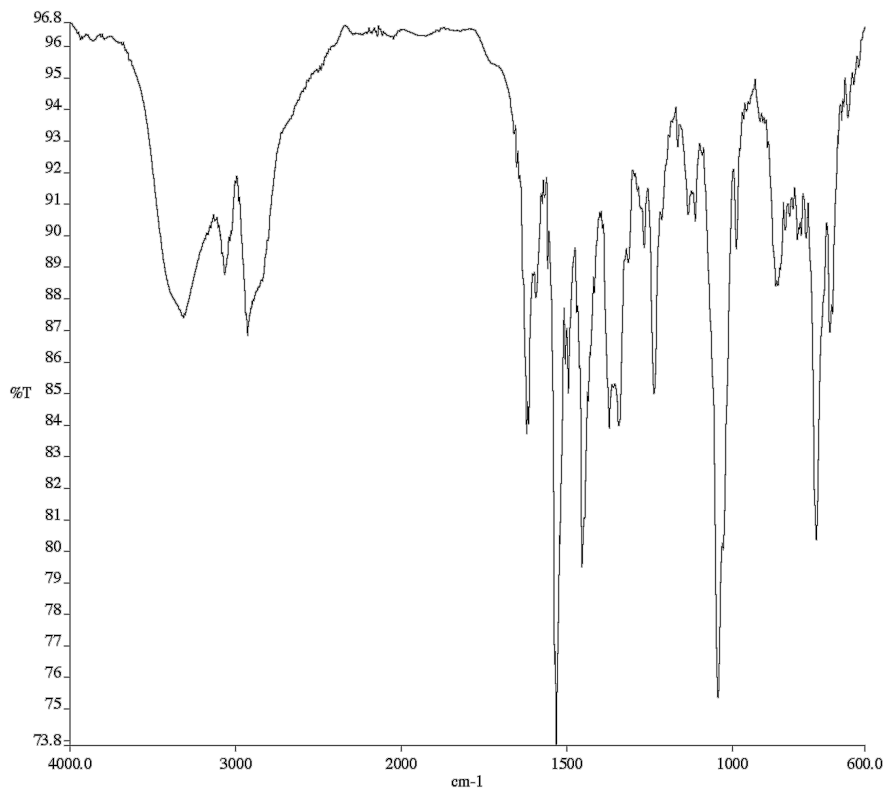

Infrared spectrum (Thin Film, NaCl) of compound **8i**.

- 152.72
- 152.68
- 152.62
- 152.58
- 150.23
- 150.20
- 150.14
- 150.10
- 140.43
- 140.28
- 140.12
- 137.94
- 137.78
- 137.63
- 135.50
- 134.40
- 129.44
- 129.22
- 126.94
- 126.81
- 125.46
- 110.90
- 110.68
- 66.68
- 58.51
- 56.66
- 38.83

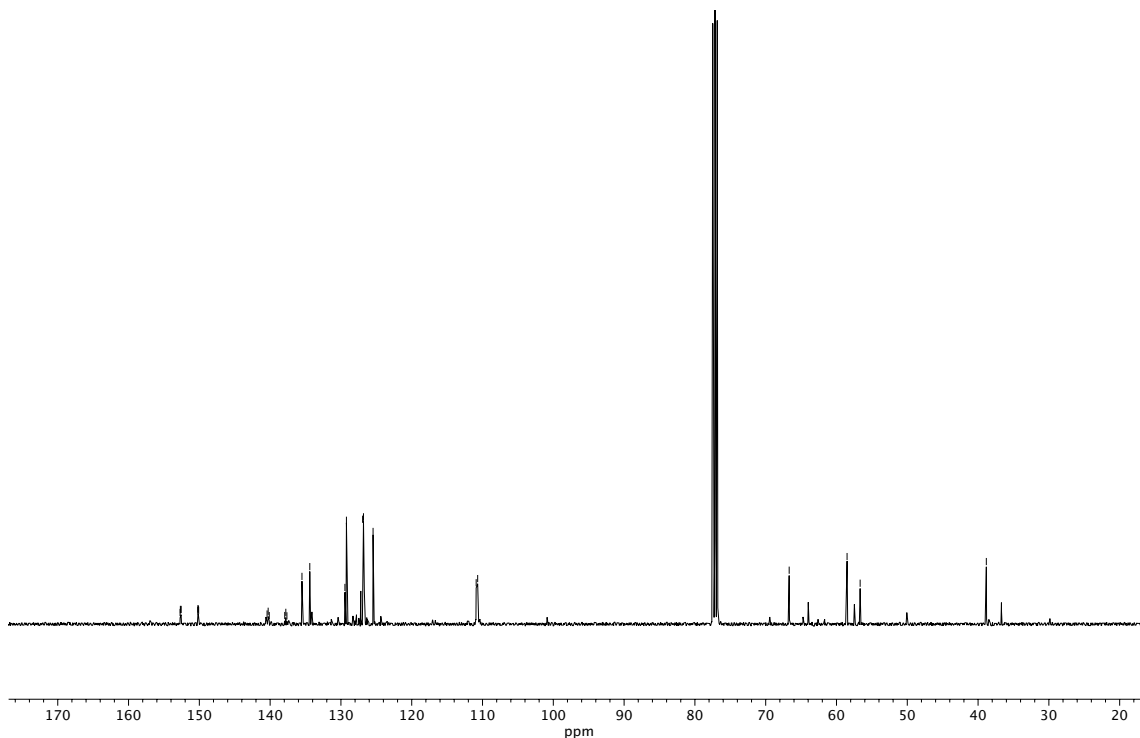

$^{13}\text{C}$  NMR (100 MHz,  $\text{CDCl}_3$ ) of compound **8i**.

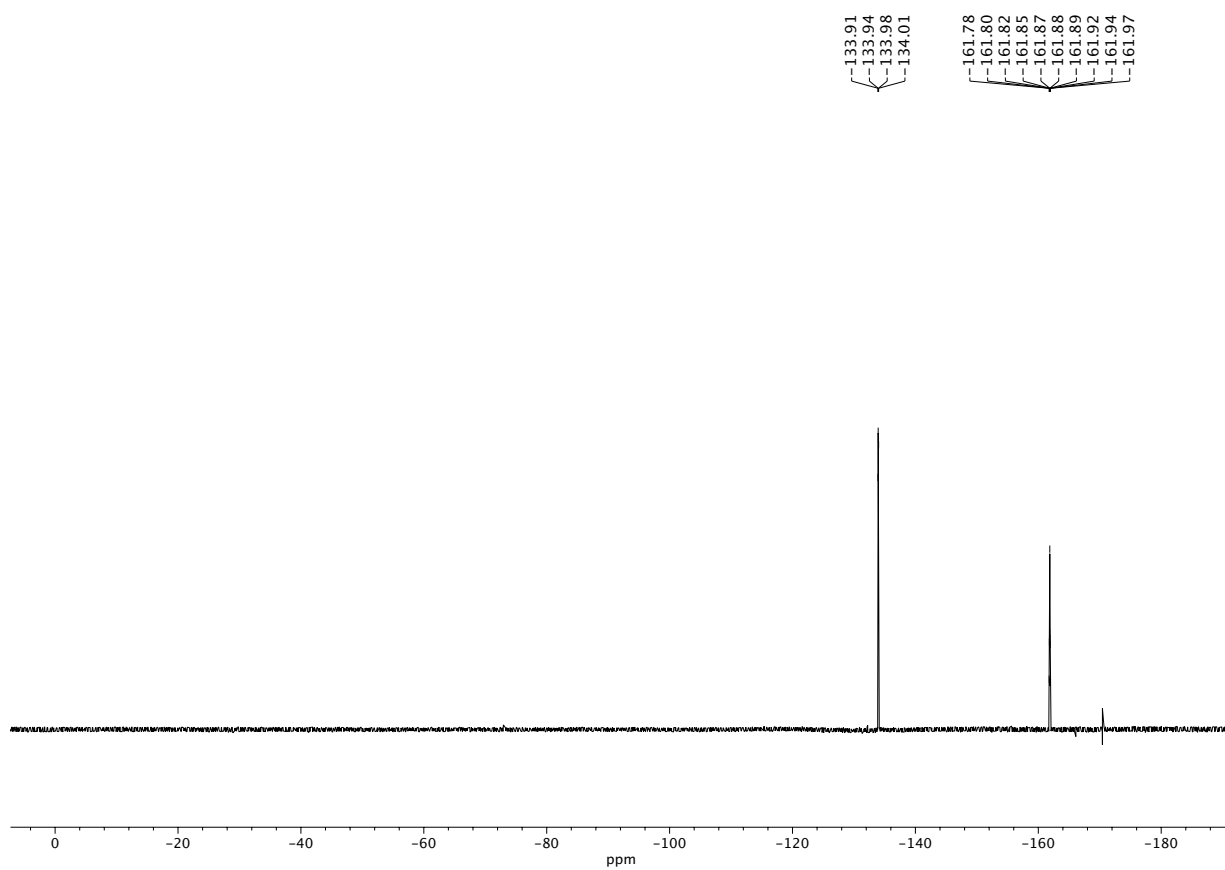

$^{19}\text{F}$  NMR (282 MHz,  $\text{CDCl}_3$ ) of **8i**.

<sup>1</sup>H NMR (400 MHz, CDCl<sub>3</sub>) of compound **8j**.

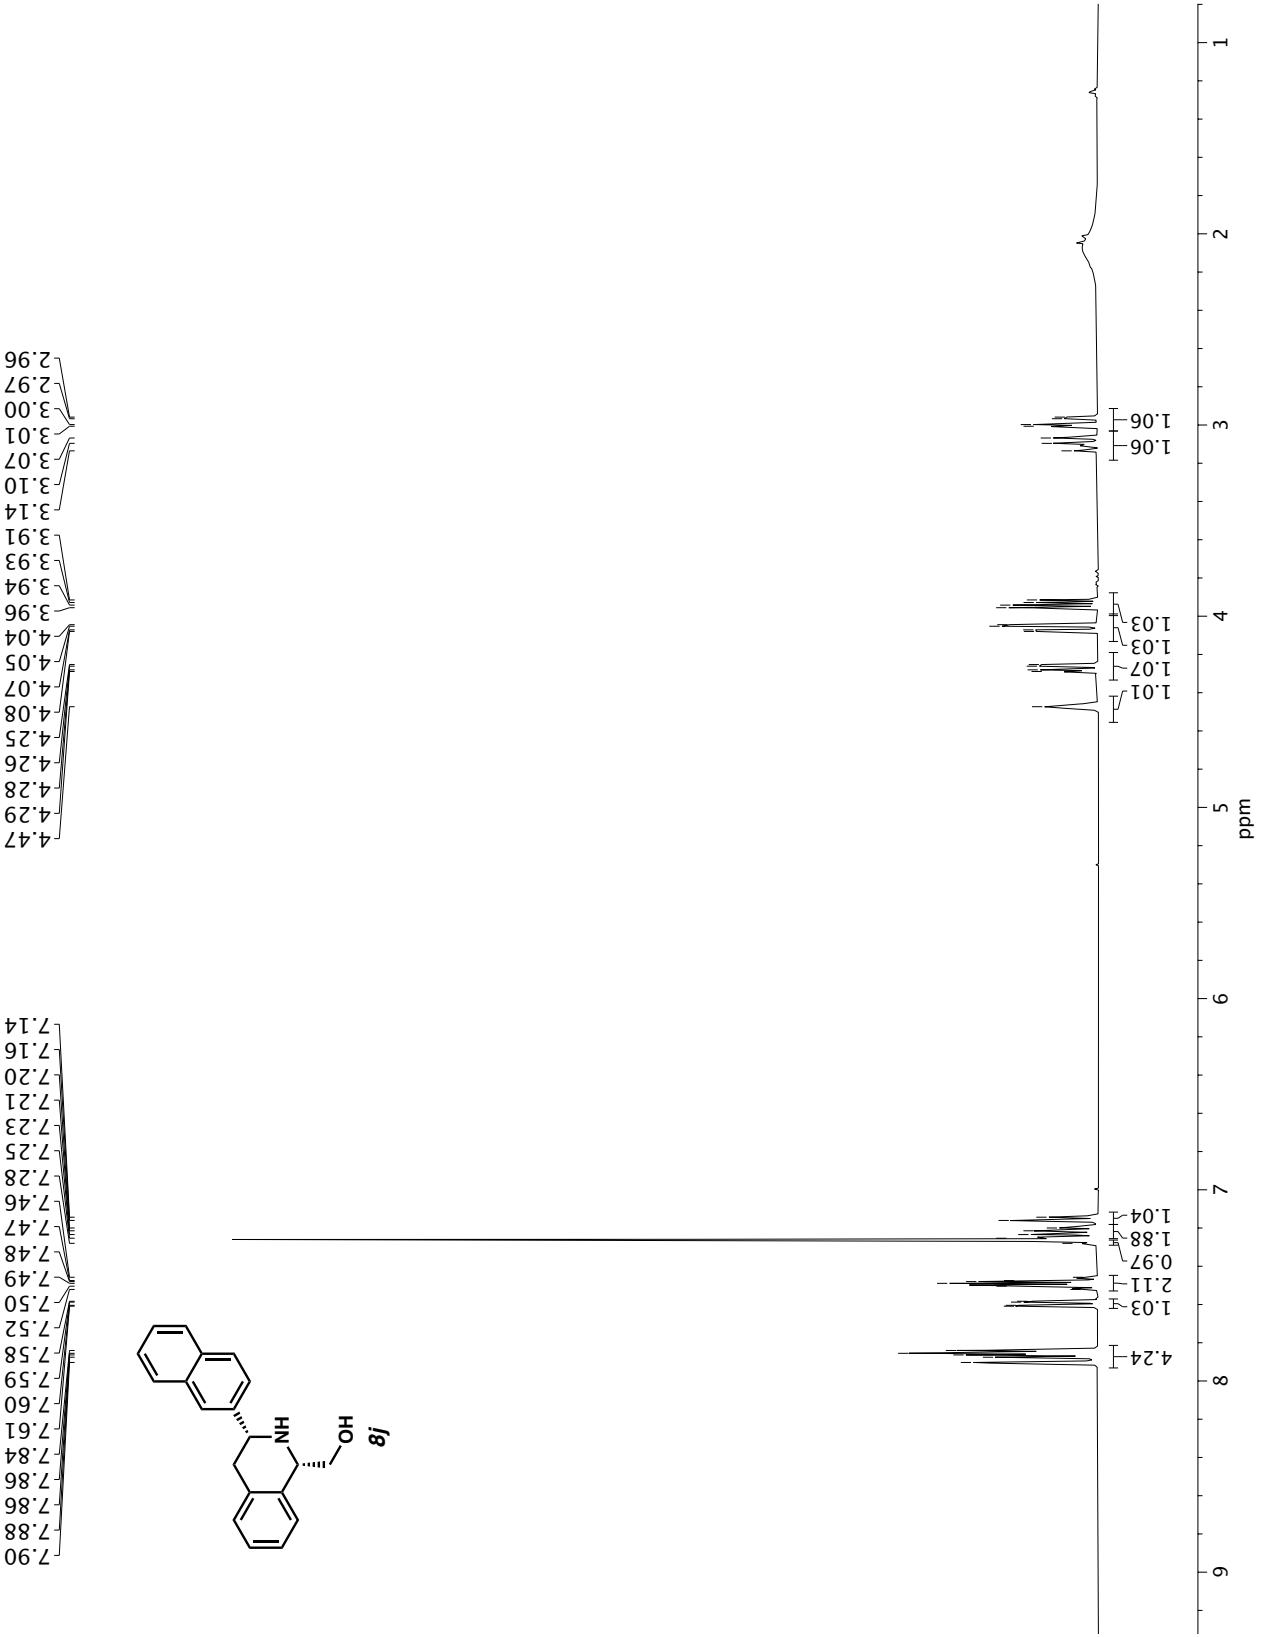



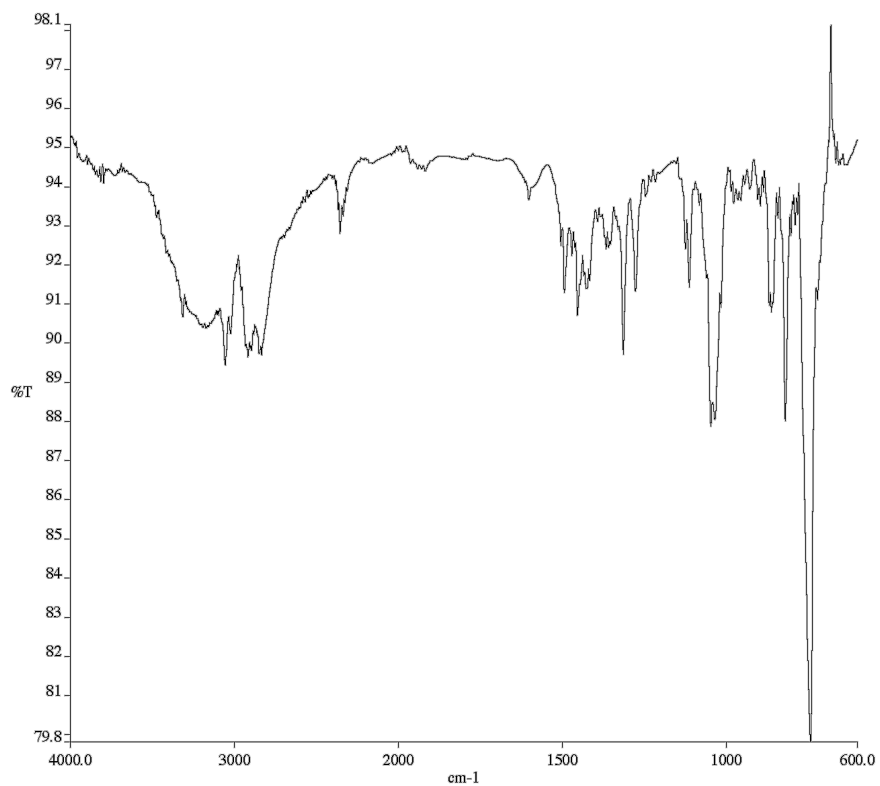

Infrared spectrum (Thin Film, NaCl) of compound **8j**.

141.81  
136.71  
135.05  
133.70  
133.23  
129.41  
128.56  
128.11  
127.93  
126.86  
126.66  
126.41  
126.05  
125.60  
125.32

66.84

58.78  
57.86

39.07

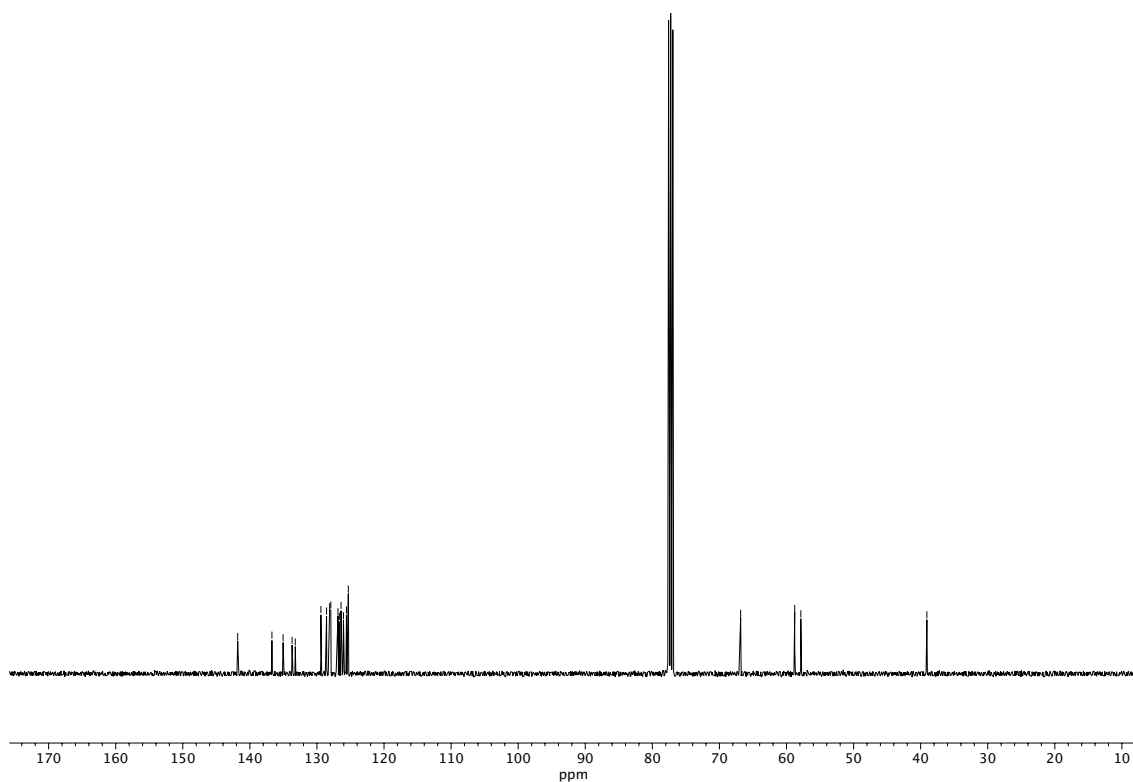

$^{13}\text{C}$  NMR (100 MHz,  $\text{CDCl}_3$ ) of compound **8j**.

2.34  
2.85  
2.86  
2.89  
2.90  
2.97  
3.00  
3.01  
3.04  
3.88  
3.89  
3.91  
3.92  
4.00  
4.01  
4.03  
4.04  
4.40

6.95  
7.07  
7.11  
7.13  
7.17  
7.18  
7.19  
7.21  
7.23  
7.24  
7.24

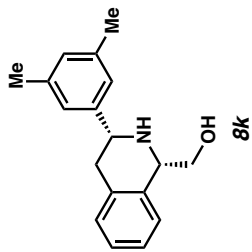

<sup>1</sup>H NMR (400 MHz, CDCl<sub>3</sub>) of compound **8k**.

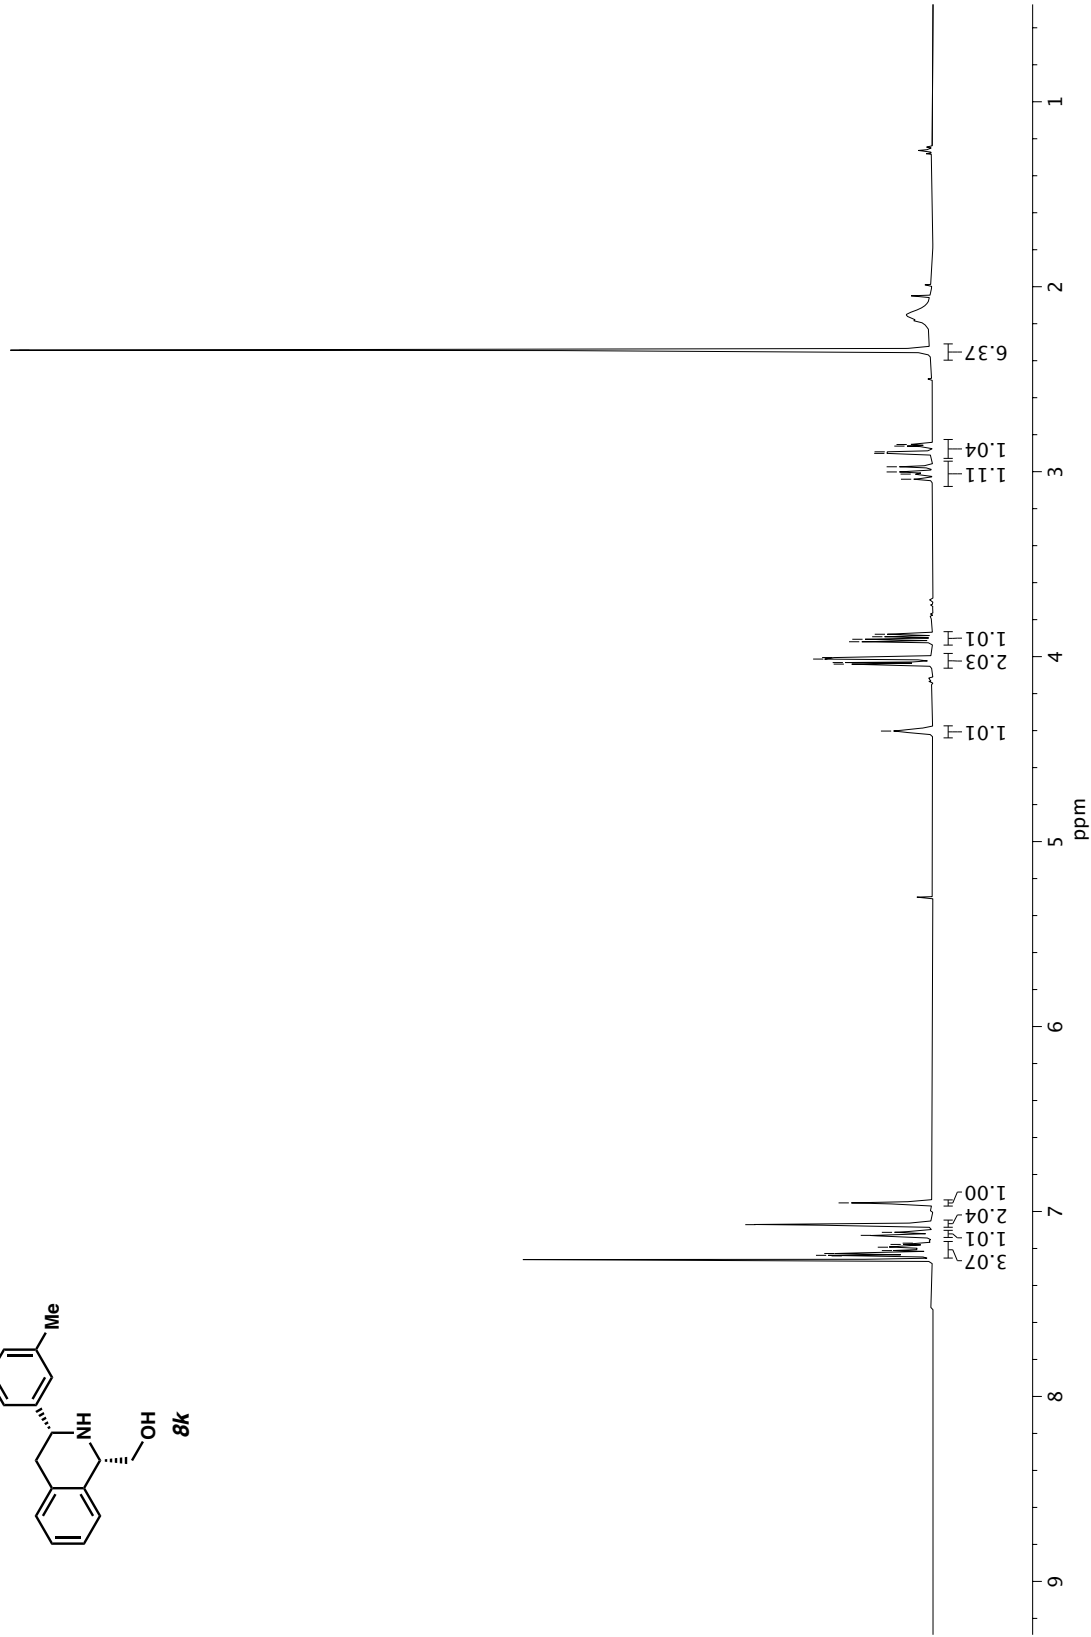

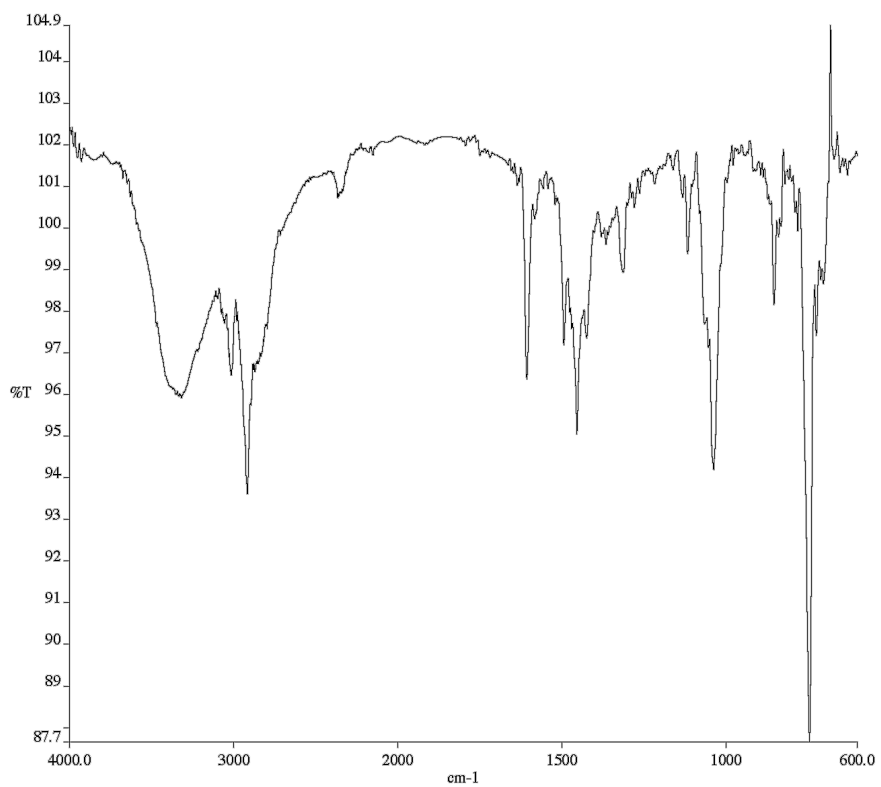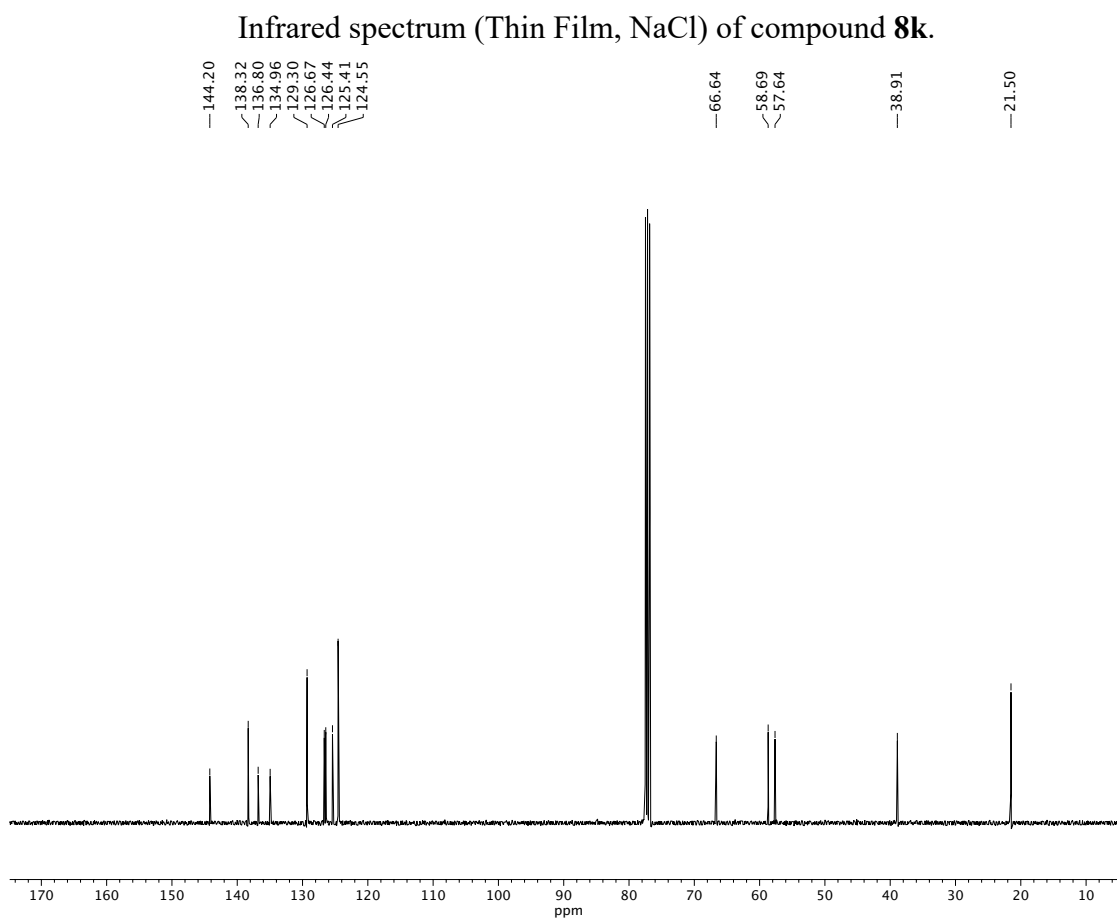

<sup>1</sup>H NMR (400 MHz, CDCl<sub>3</sub>) of compound **81**.

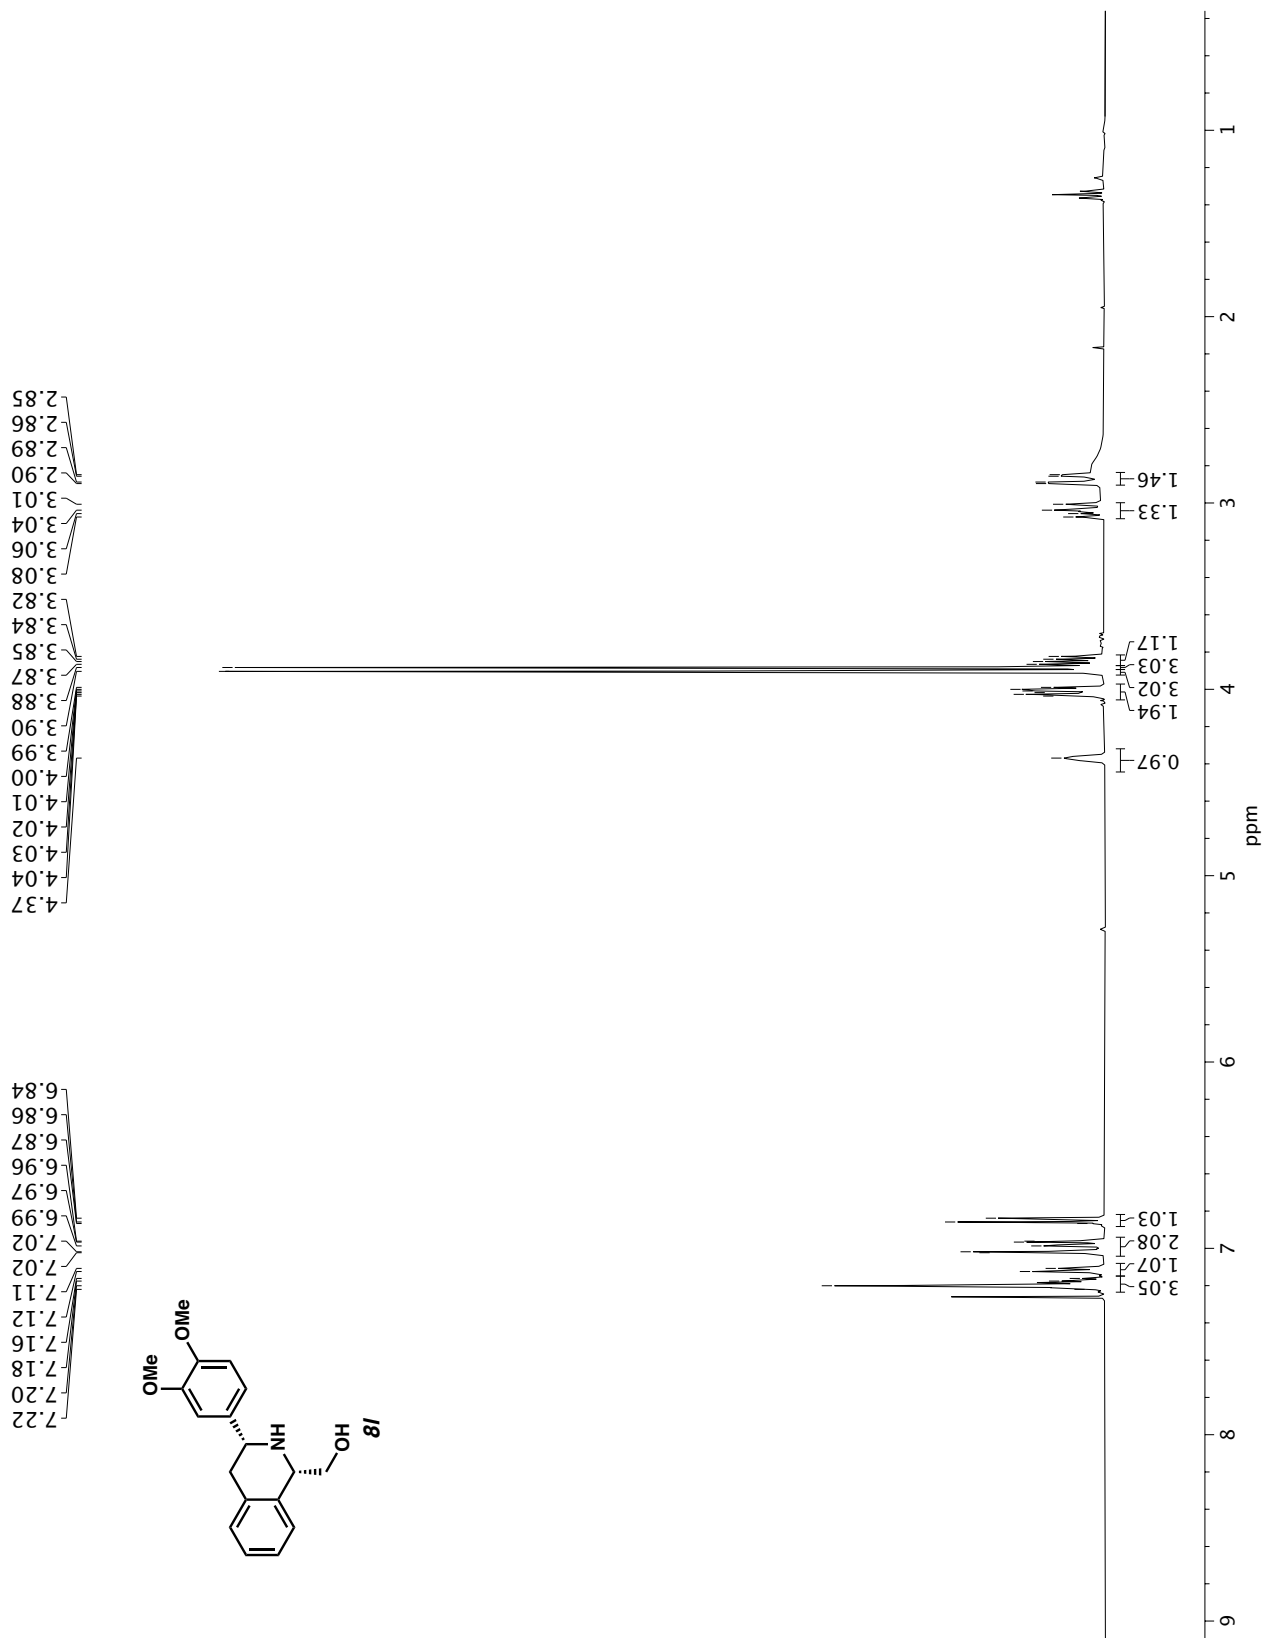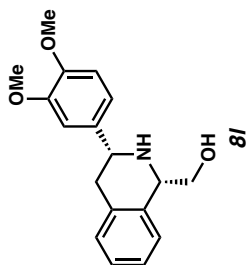

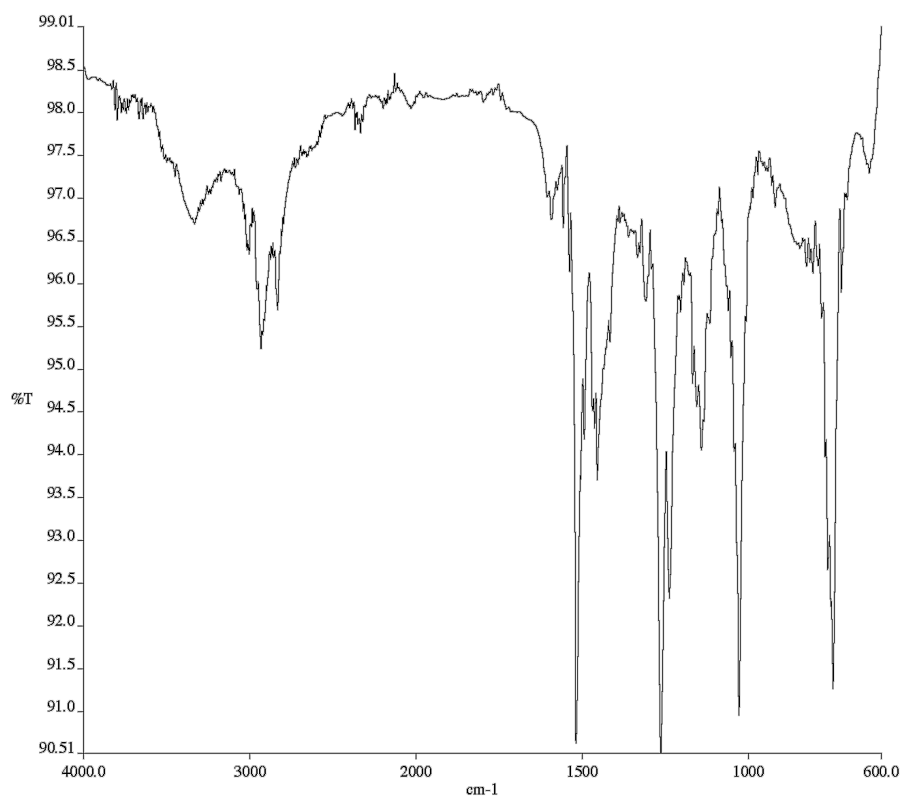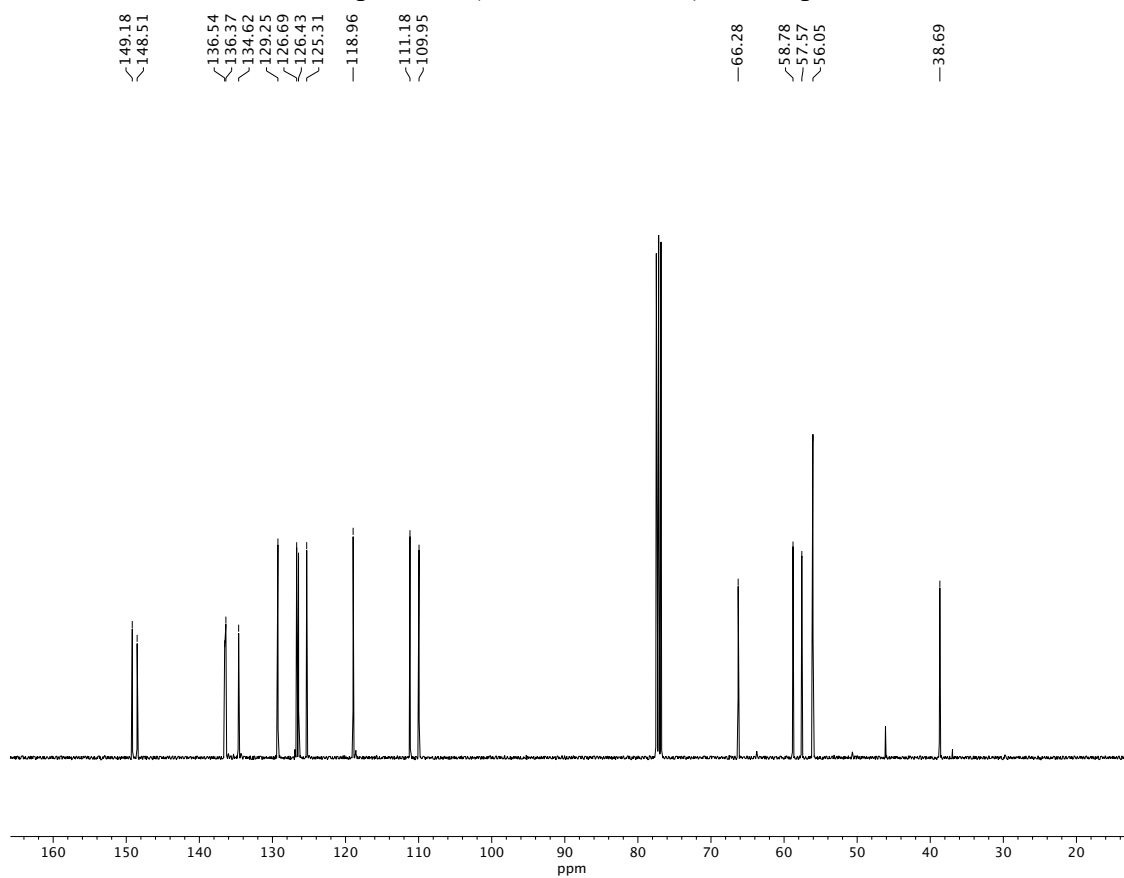

<sup>13</sup>C NMR (100 MHz, CDCl<sub>3</sub>) of compound **8I**.

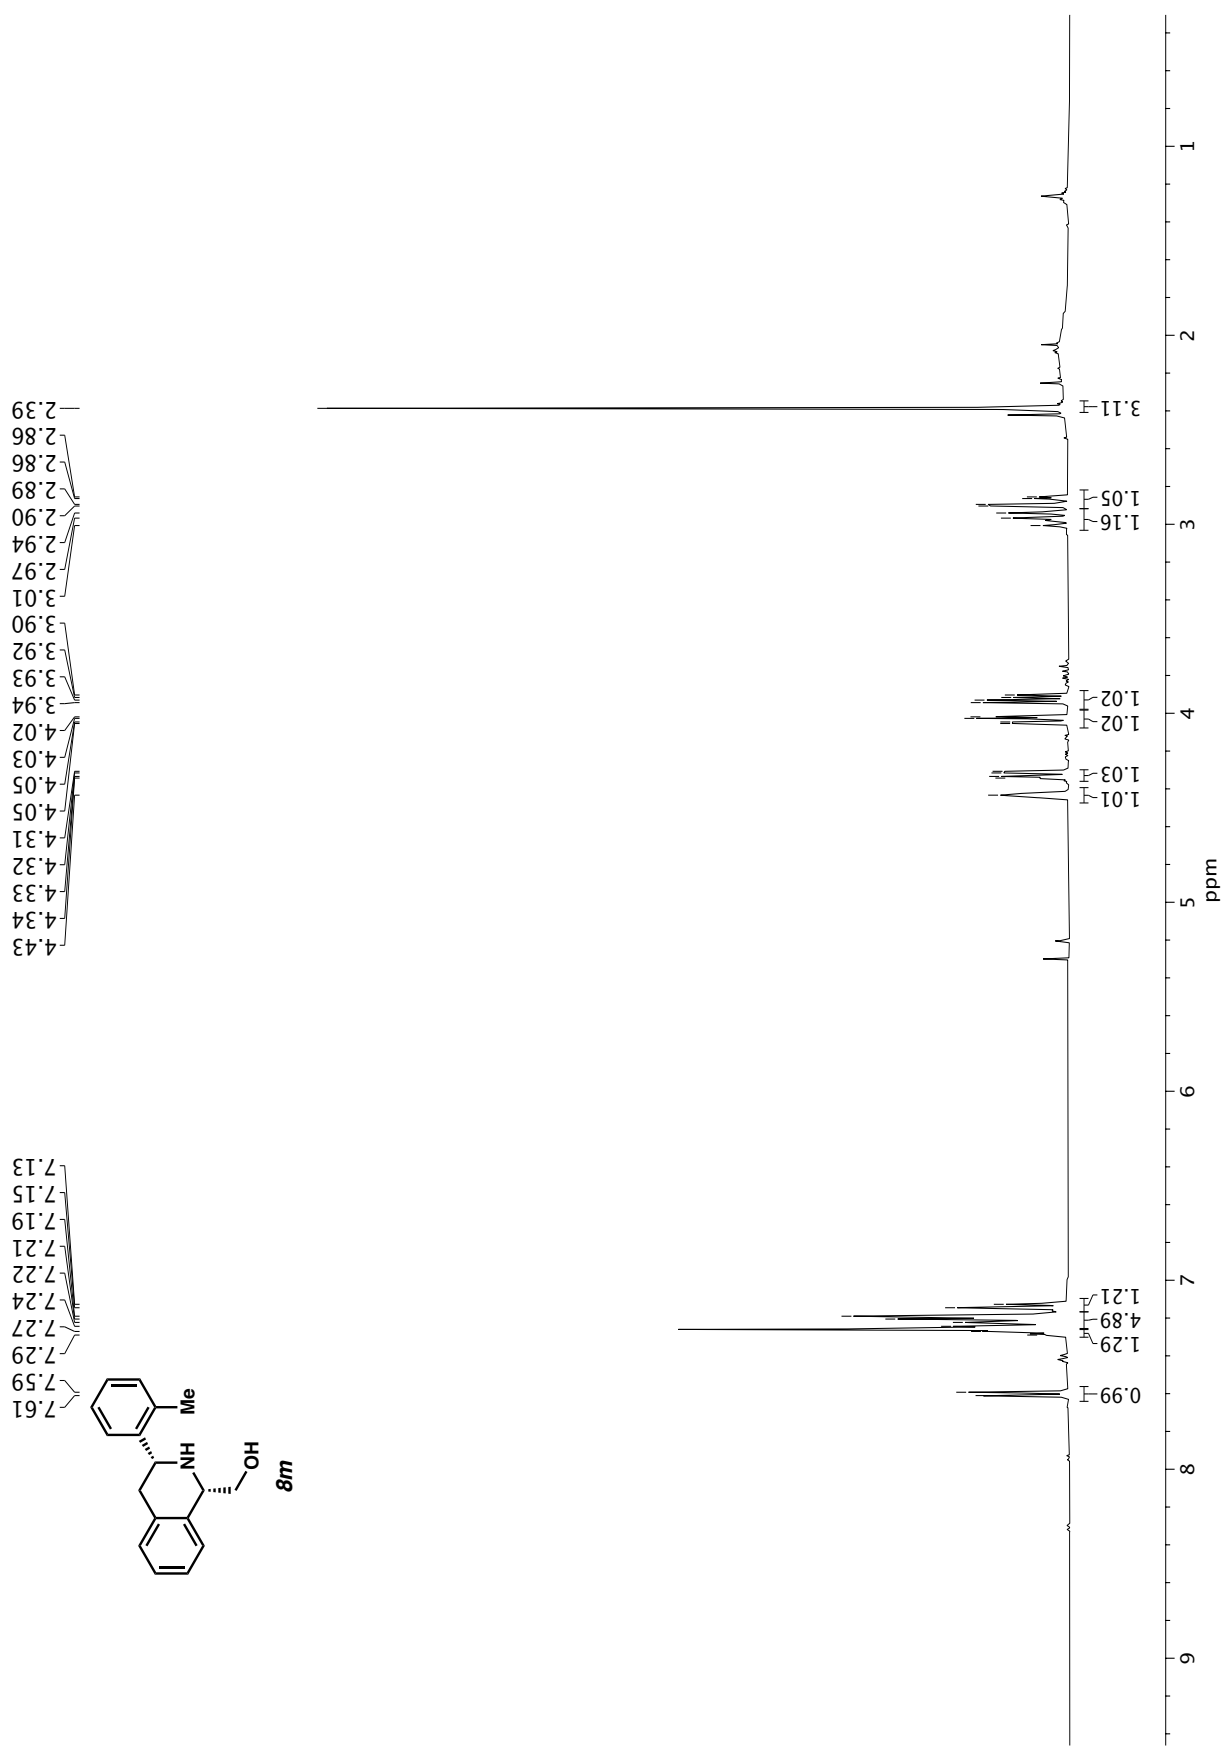

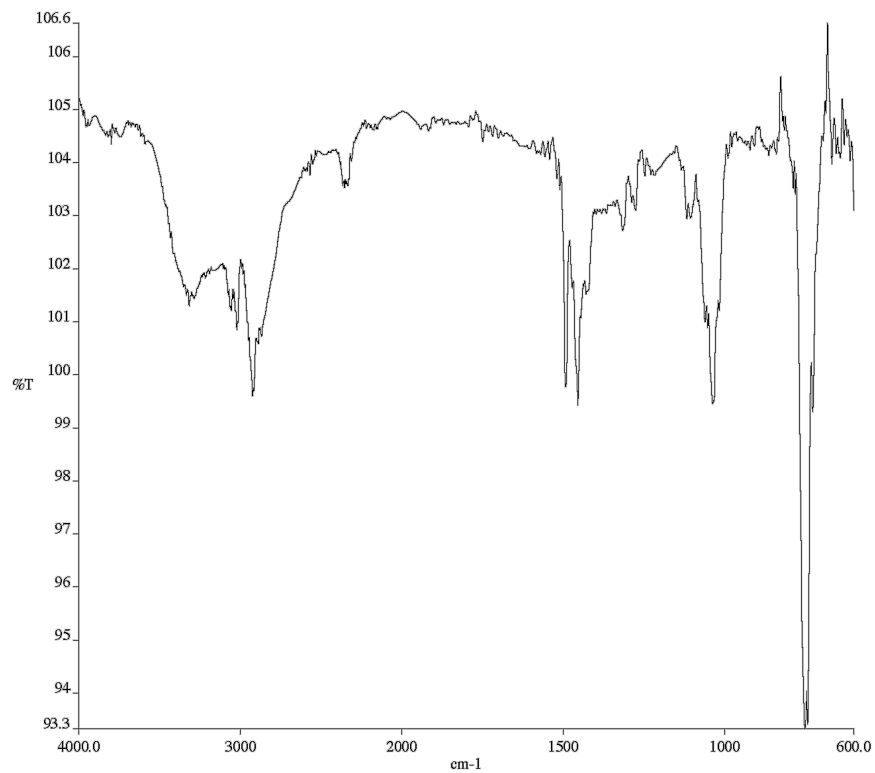

Infrared spectrum (Thin Film, NaCl) of compound **8m**.

142.22  
136.91  
135.24  
135.02  
130.59  
129.36  
127.25  
126.69  
126.52  
125.62  
125.47

66.62

58.92

53.40

37.72

19.45

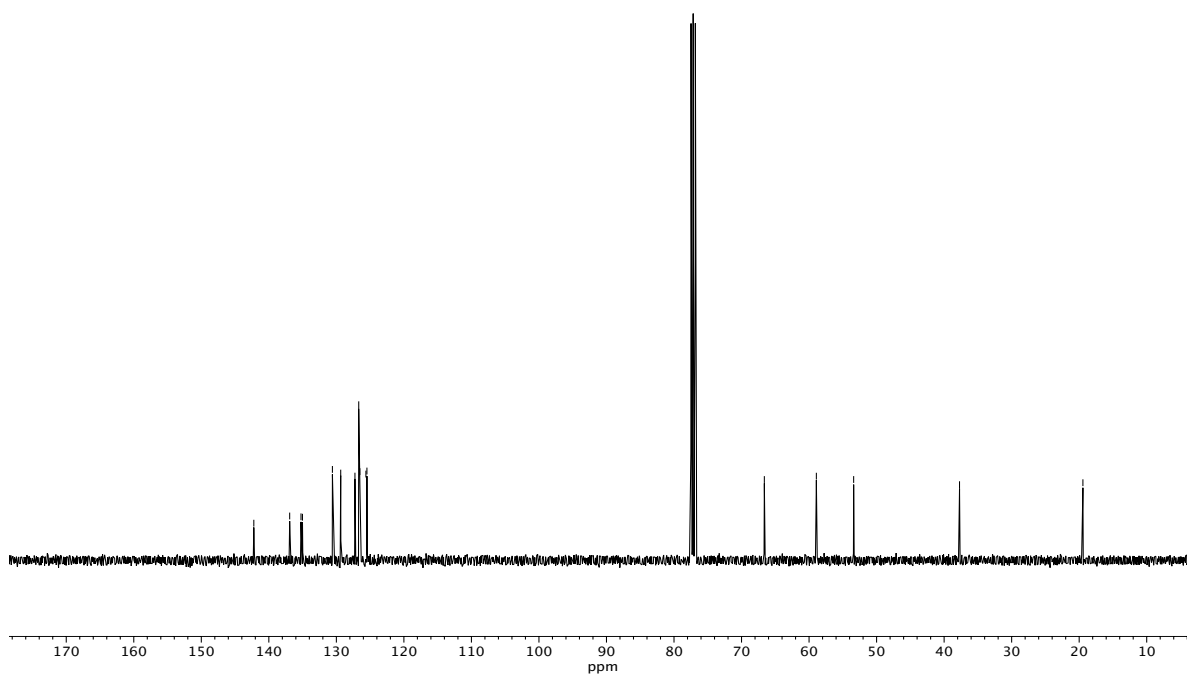

$^{13}\text{C}$  NMR (100 MHz,  $\text{CDCl}_3$ ) of compound **8m**.

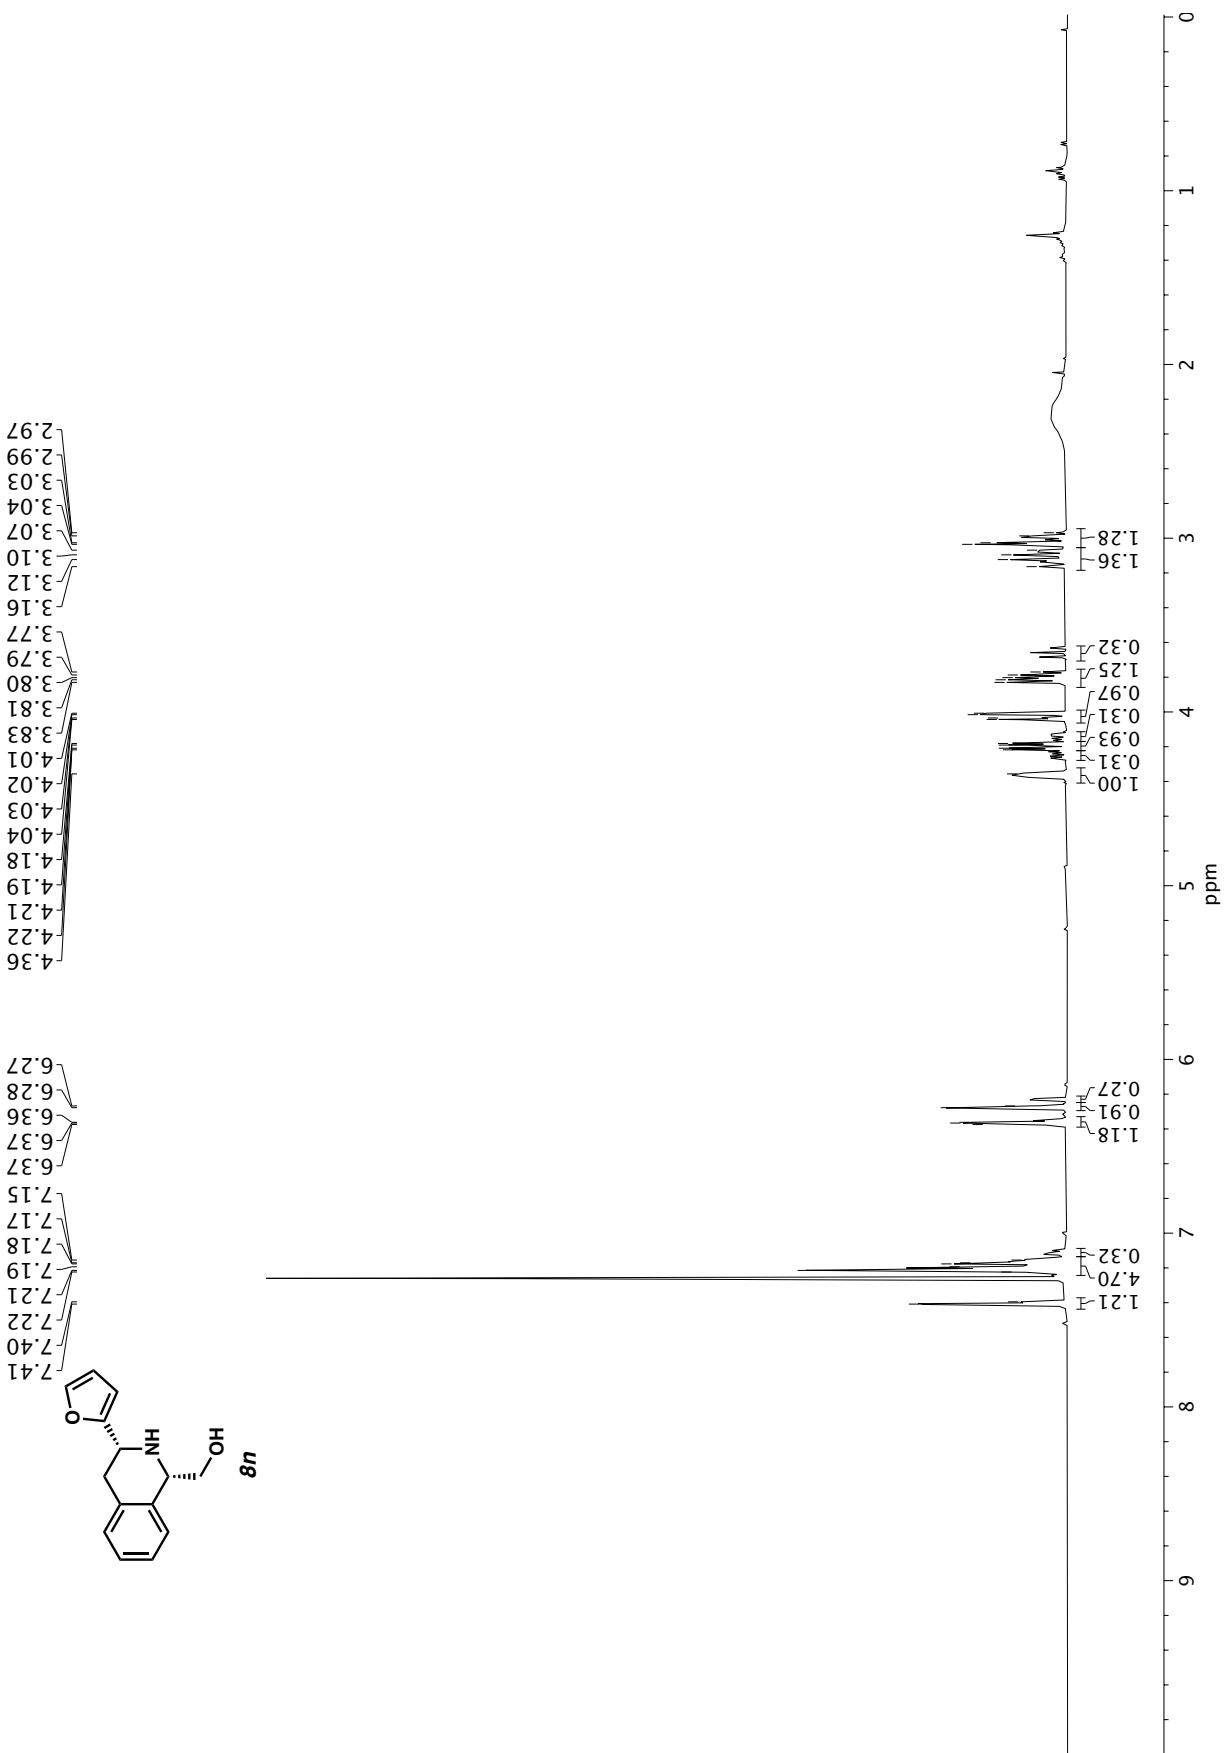



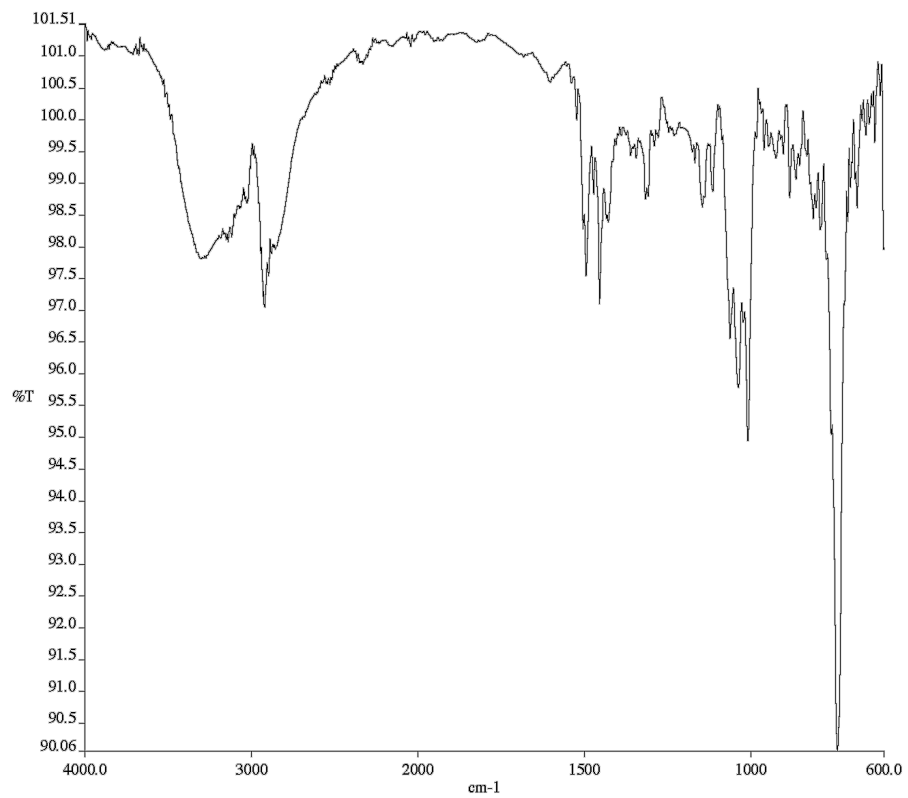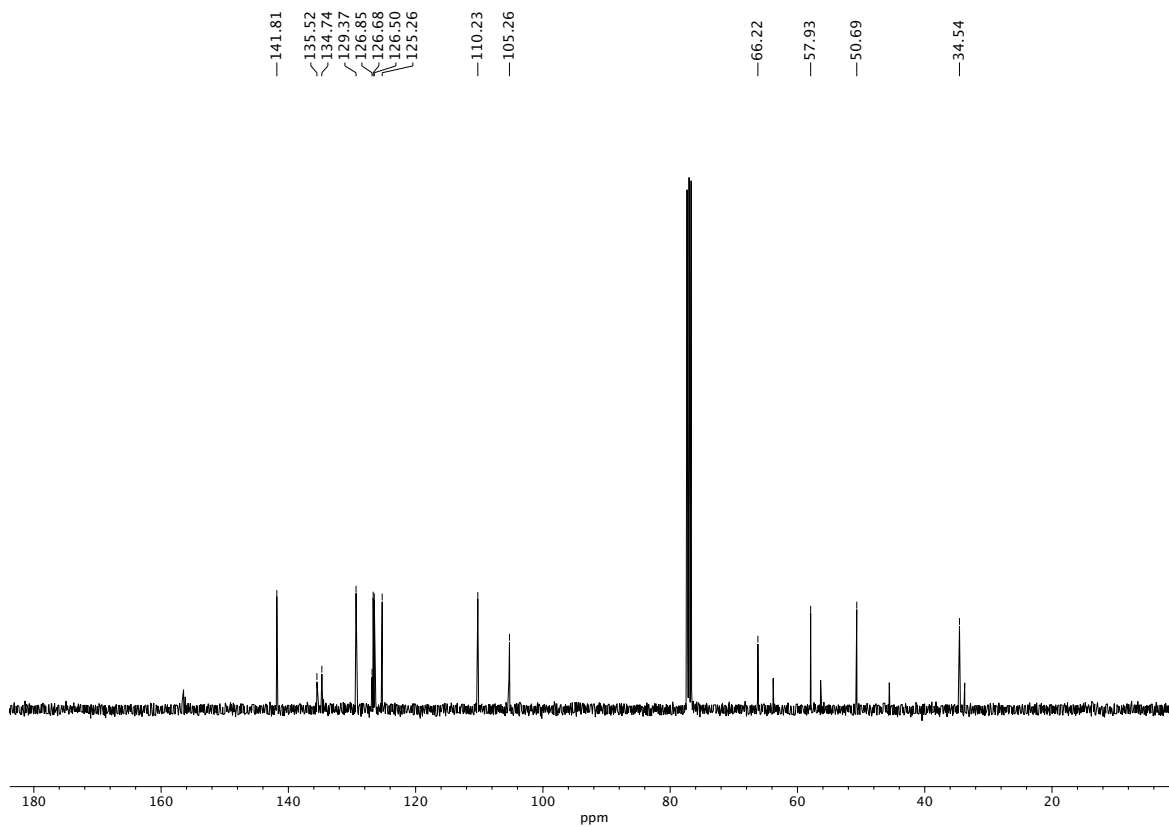

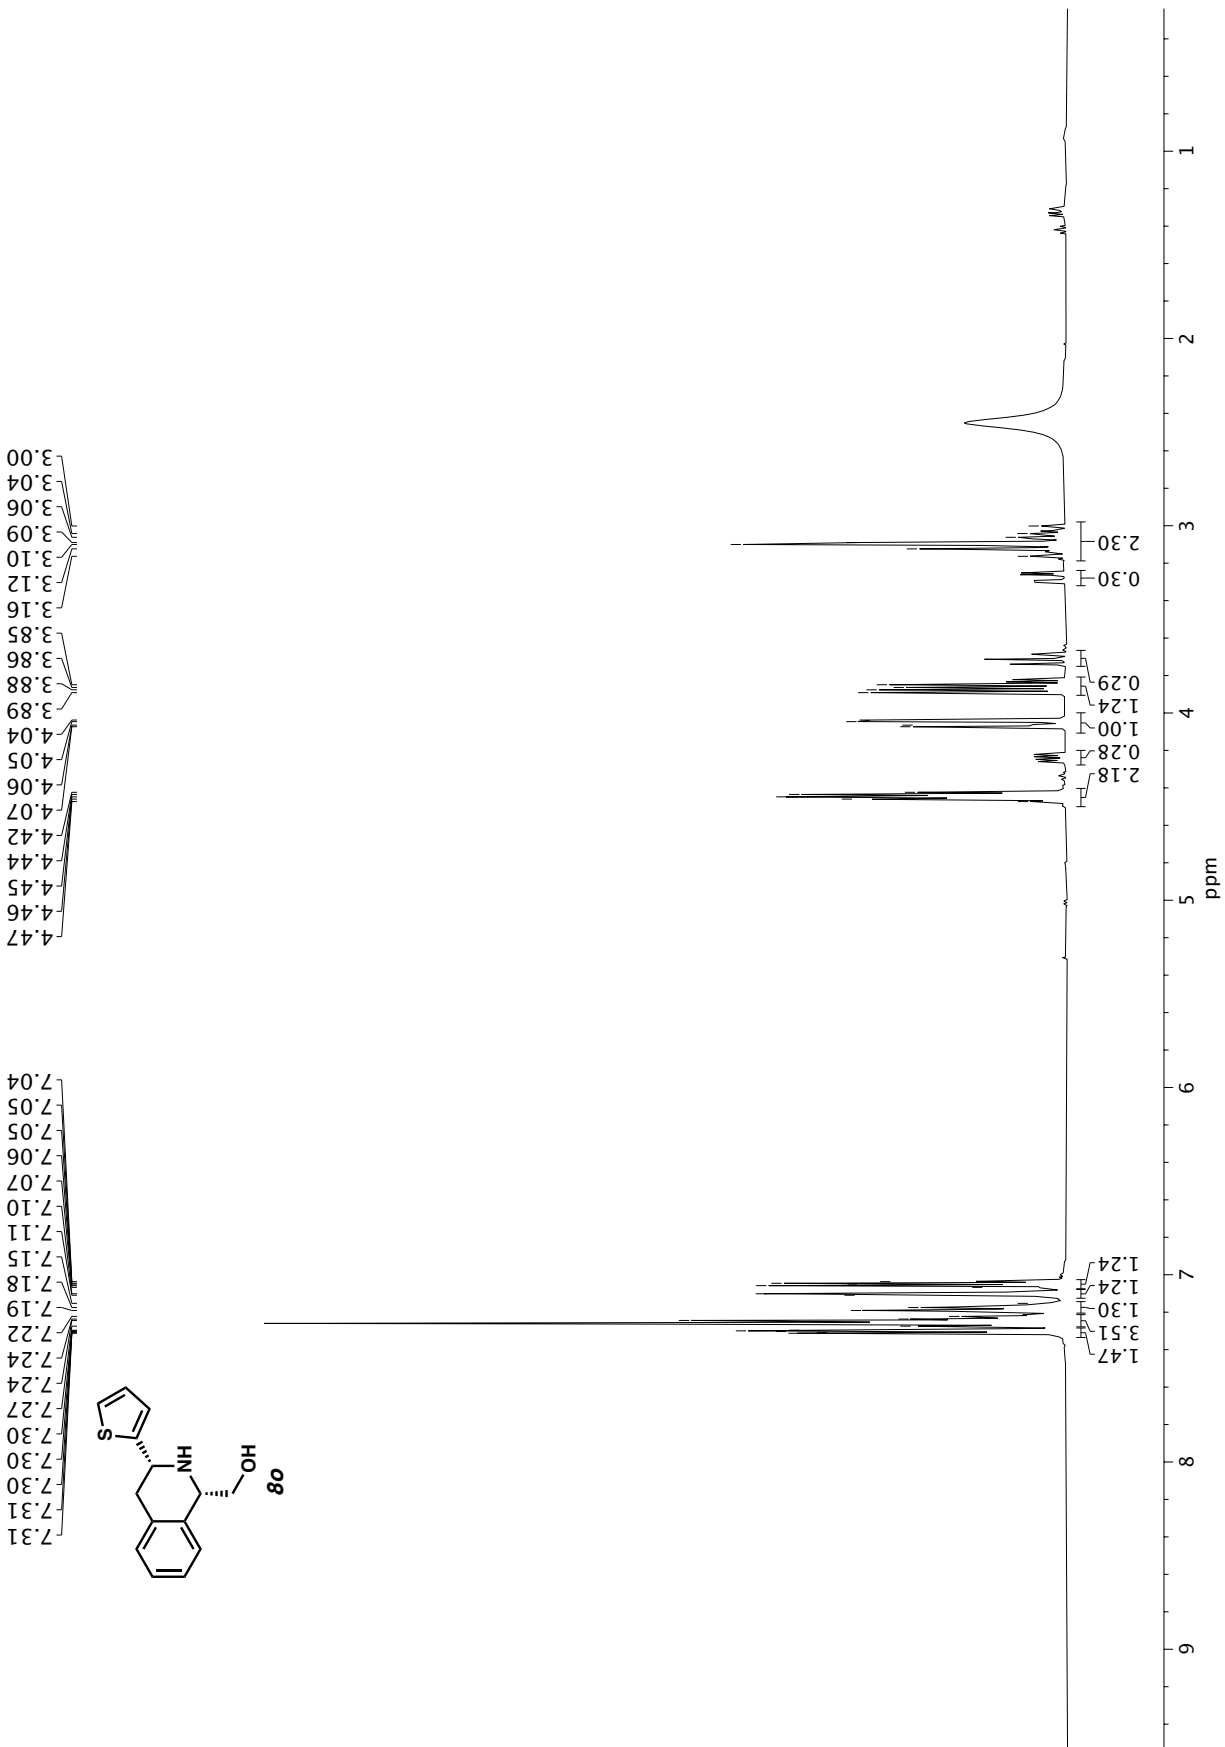

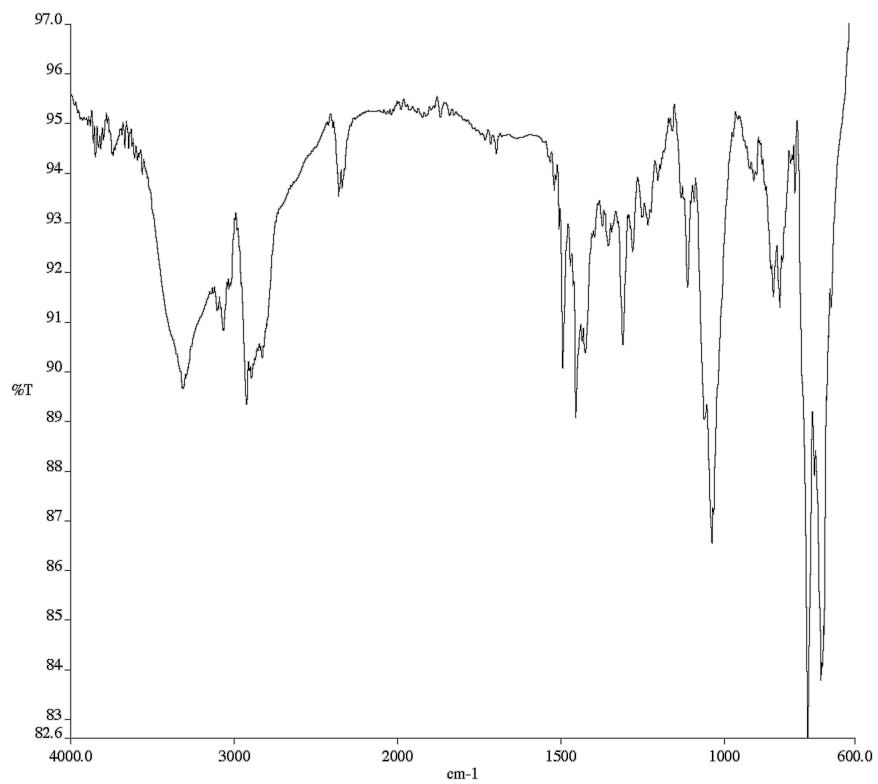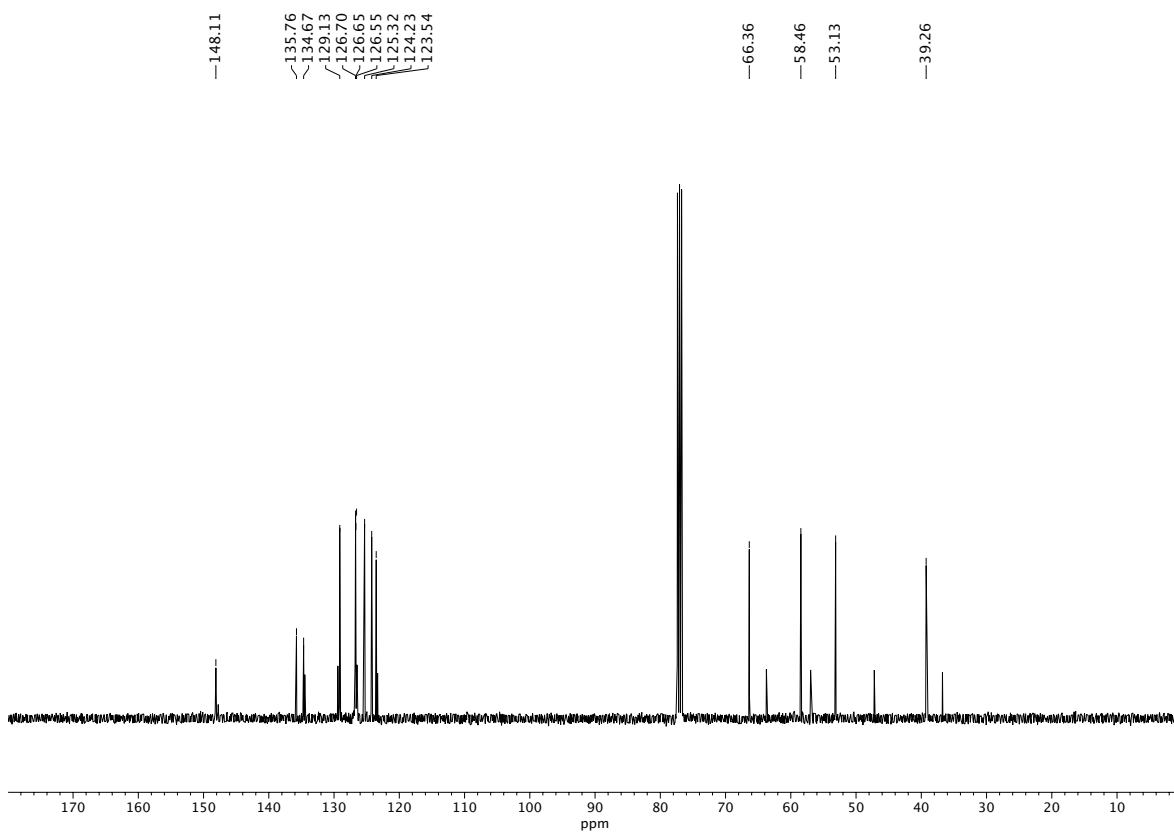

<sup>13</sup>C NMR (100 MHz, CDCl<sub>3</sub>) of compound **80**.

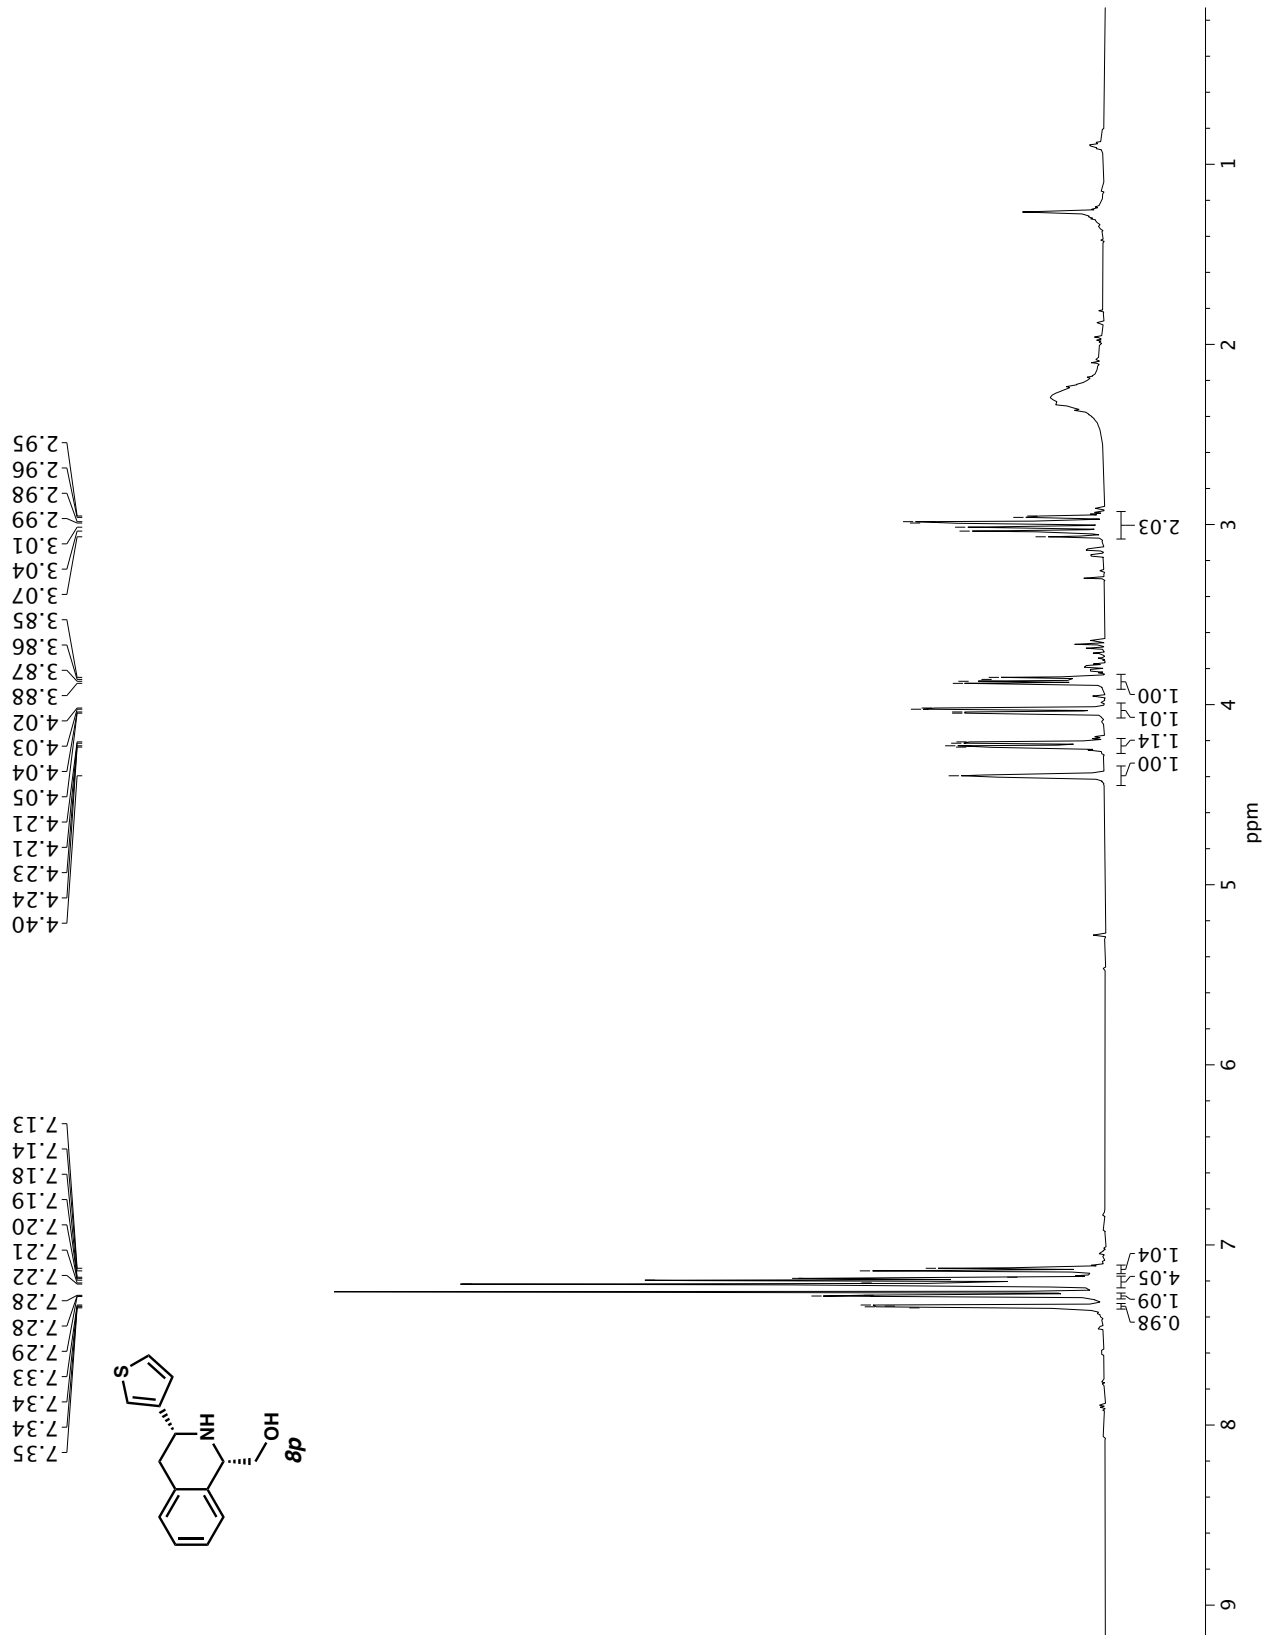

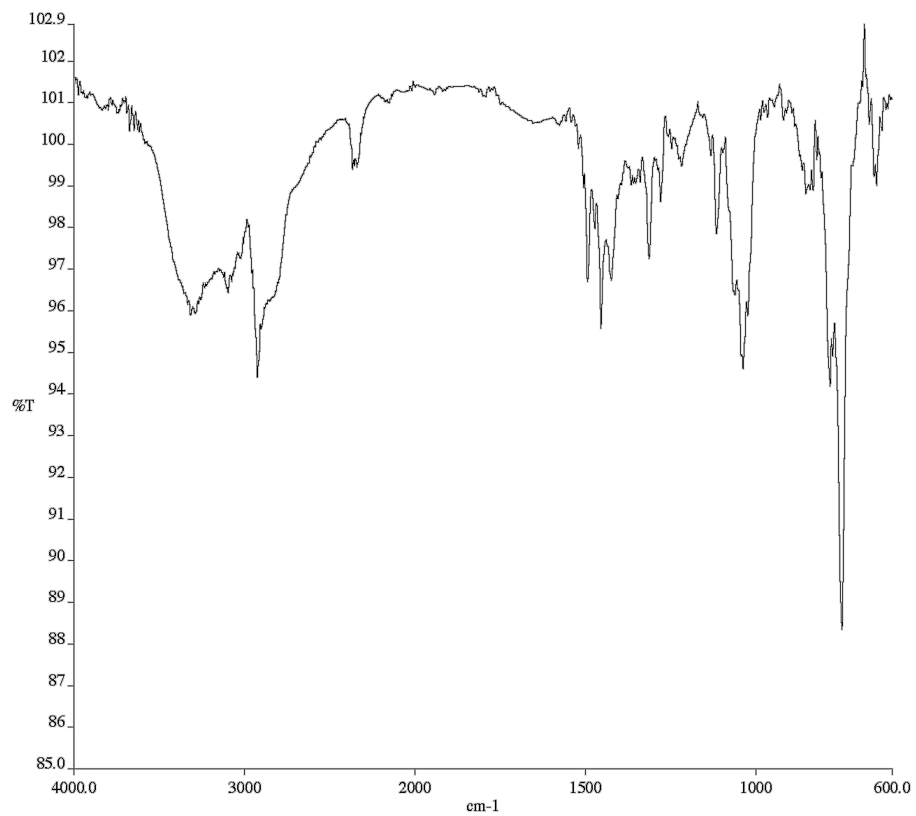

Infrared spectrum (Thin Film, NaCl) of compound **8p**.

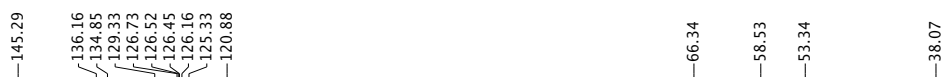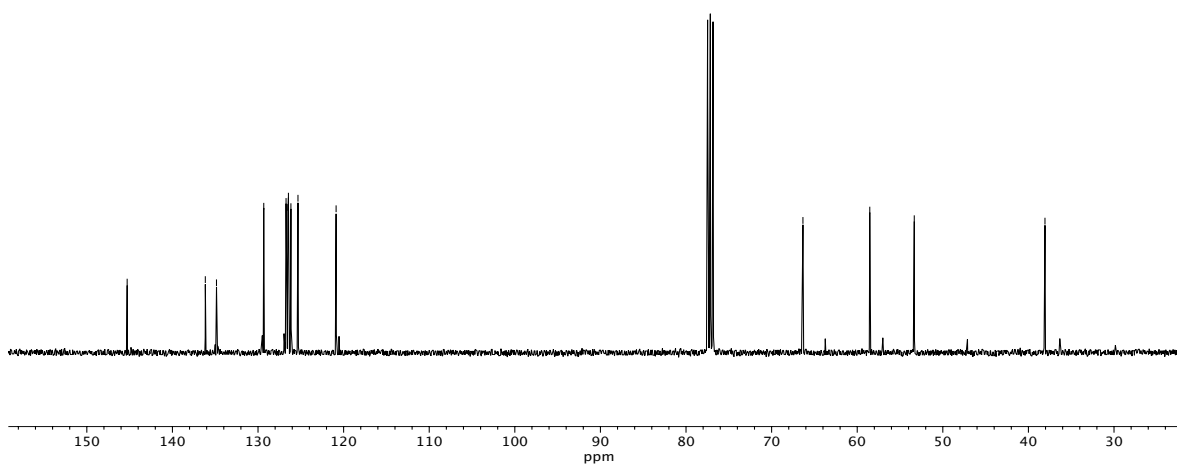

$^{13}\text{C}$  NMR (100 MHz,  $\text{CDCl}_3$ ) of compound **8p**.

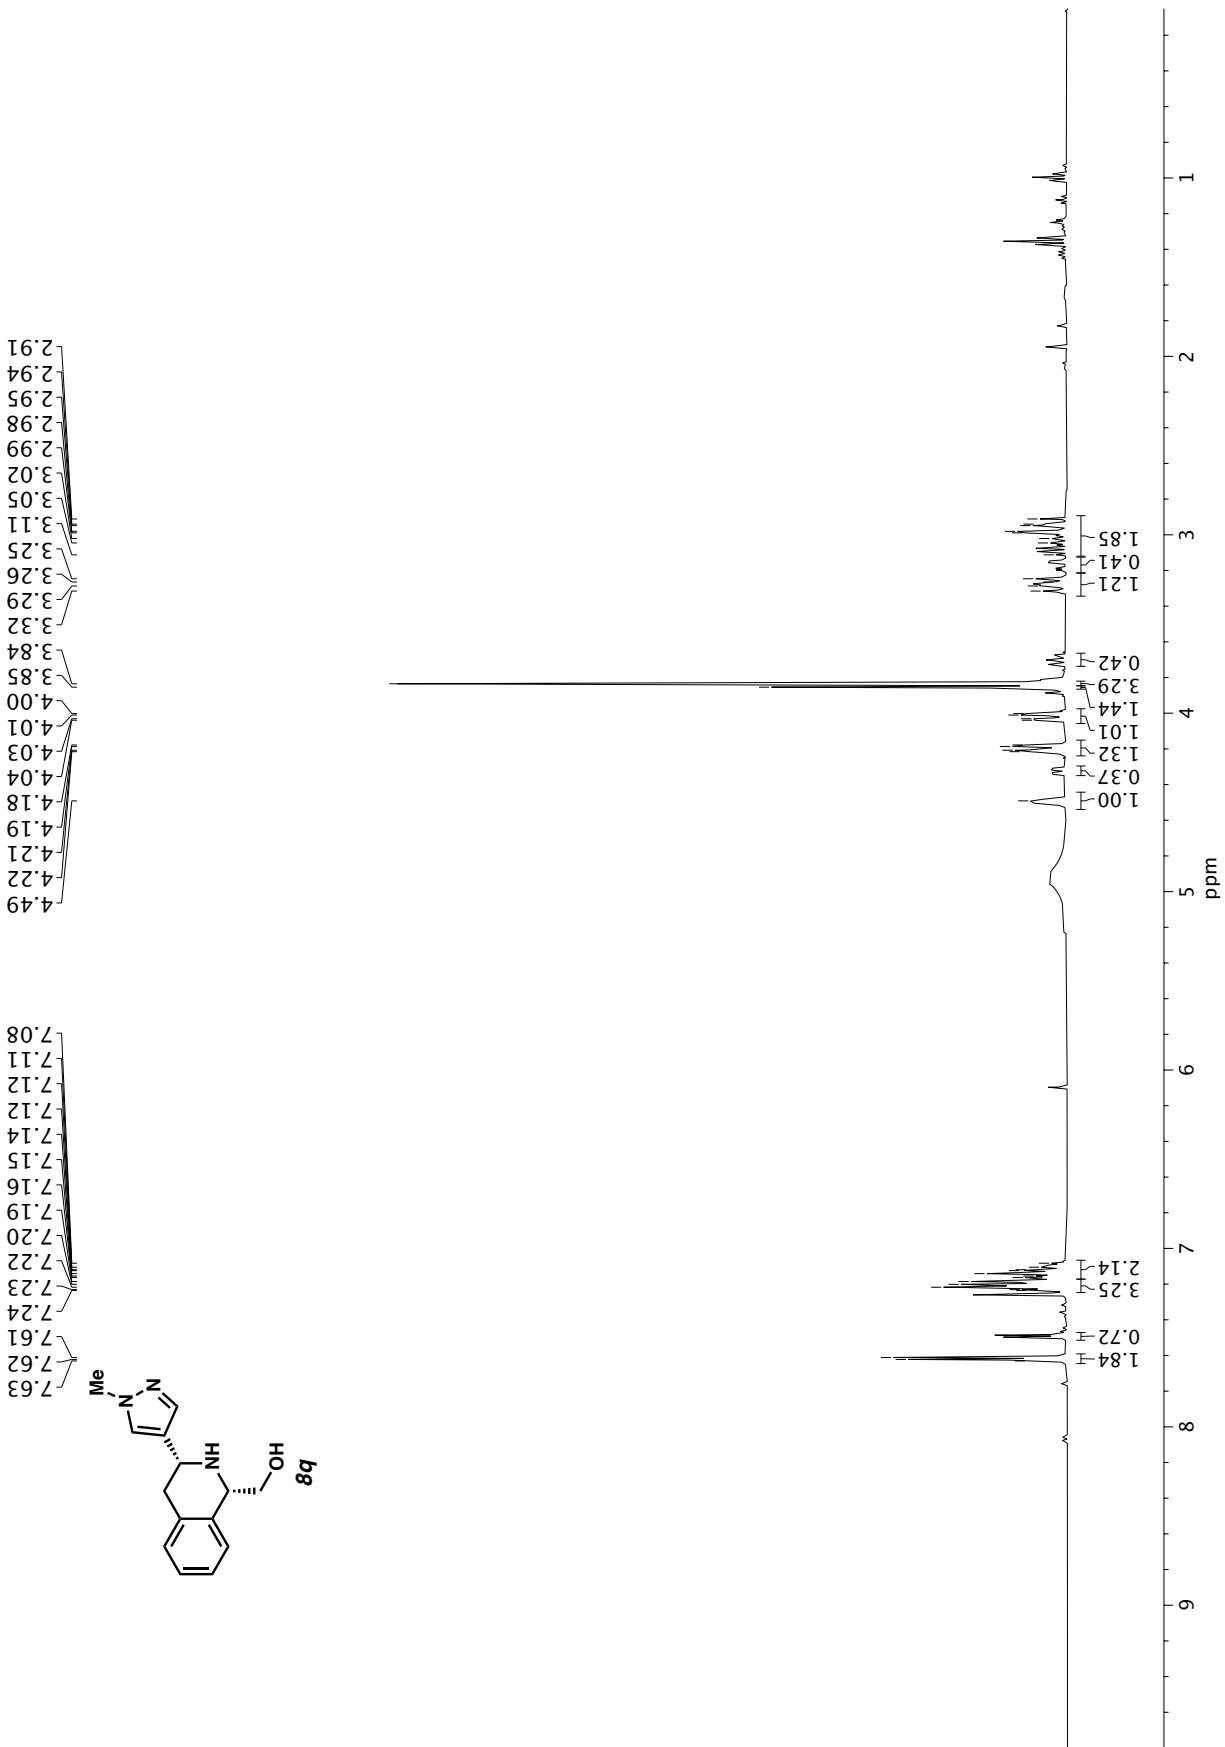

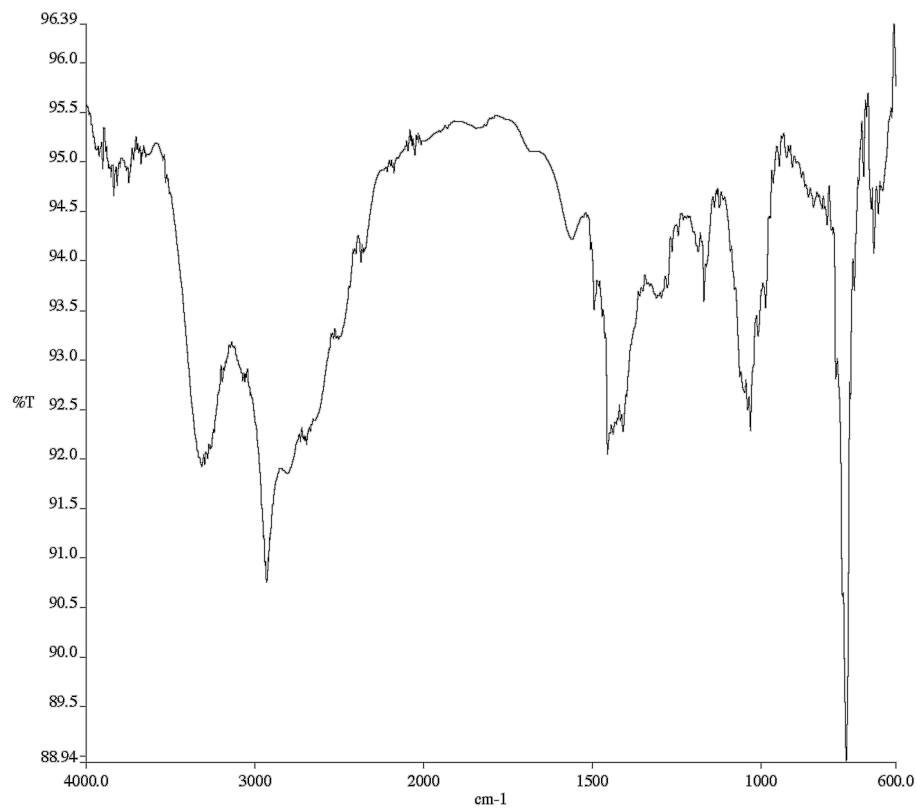

Infrared spectrum (Thin Film, NaCl) of compound **8q**.

~138.16  
 ~134.72  
 ~132.18  
 ~129.31  
 ~127.17  
 ~126.92  
 ~125.40  
 ~121.45

—64.64  
 —58.63  
 —49.14  
 —39.04  
 —36.14

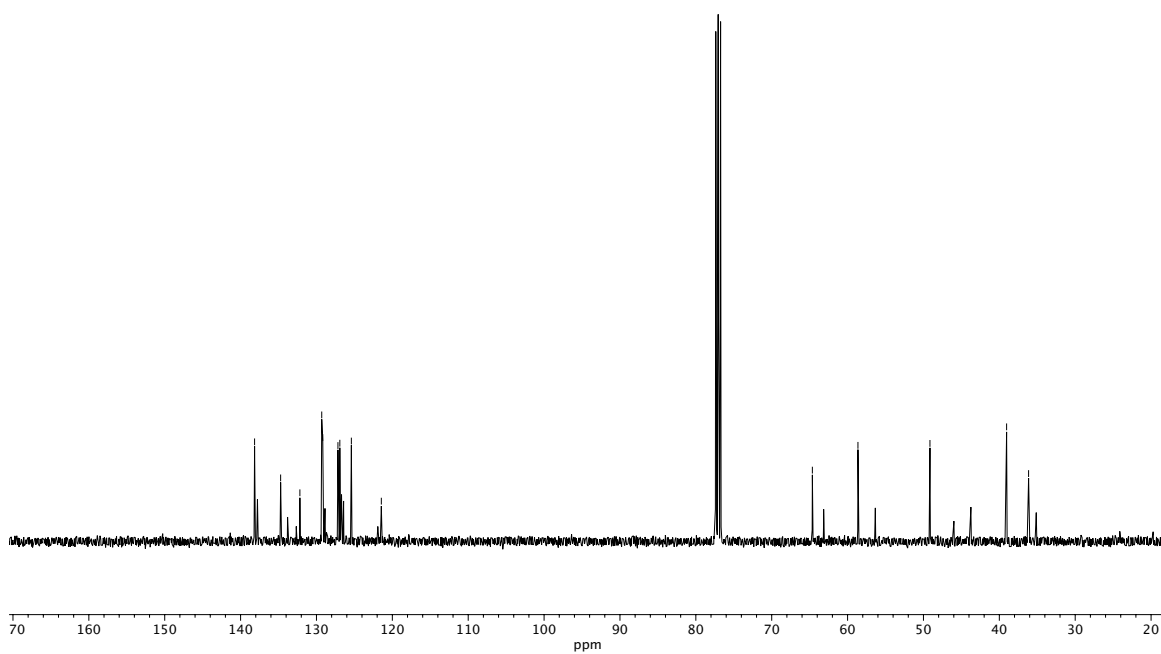

$^{13}\text{C}$  NMR (100 MHz,  $\text{CDCl}_3$ ) of compound **8q**.

4.40  
4.23  
4.21  
4.20  
4.09  
4.08  
4.06  
4.05  
3.87  
3.85  
3.84  
3.83  
3.08  
3.06  
3.02  
3.01  
3.00

8.60  
8.59  
8.57  
7.72  
7.72  
7.70  
7.70  
7.68  
7.68  
7.67  
7.44  
7.42  
7.22  
7.21  
7.19  
7.16  
7.14  
7.12  
7.11

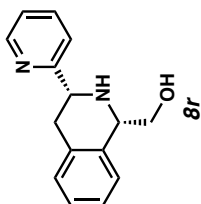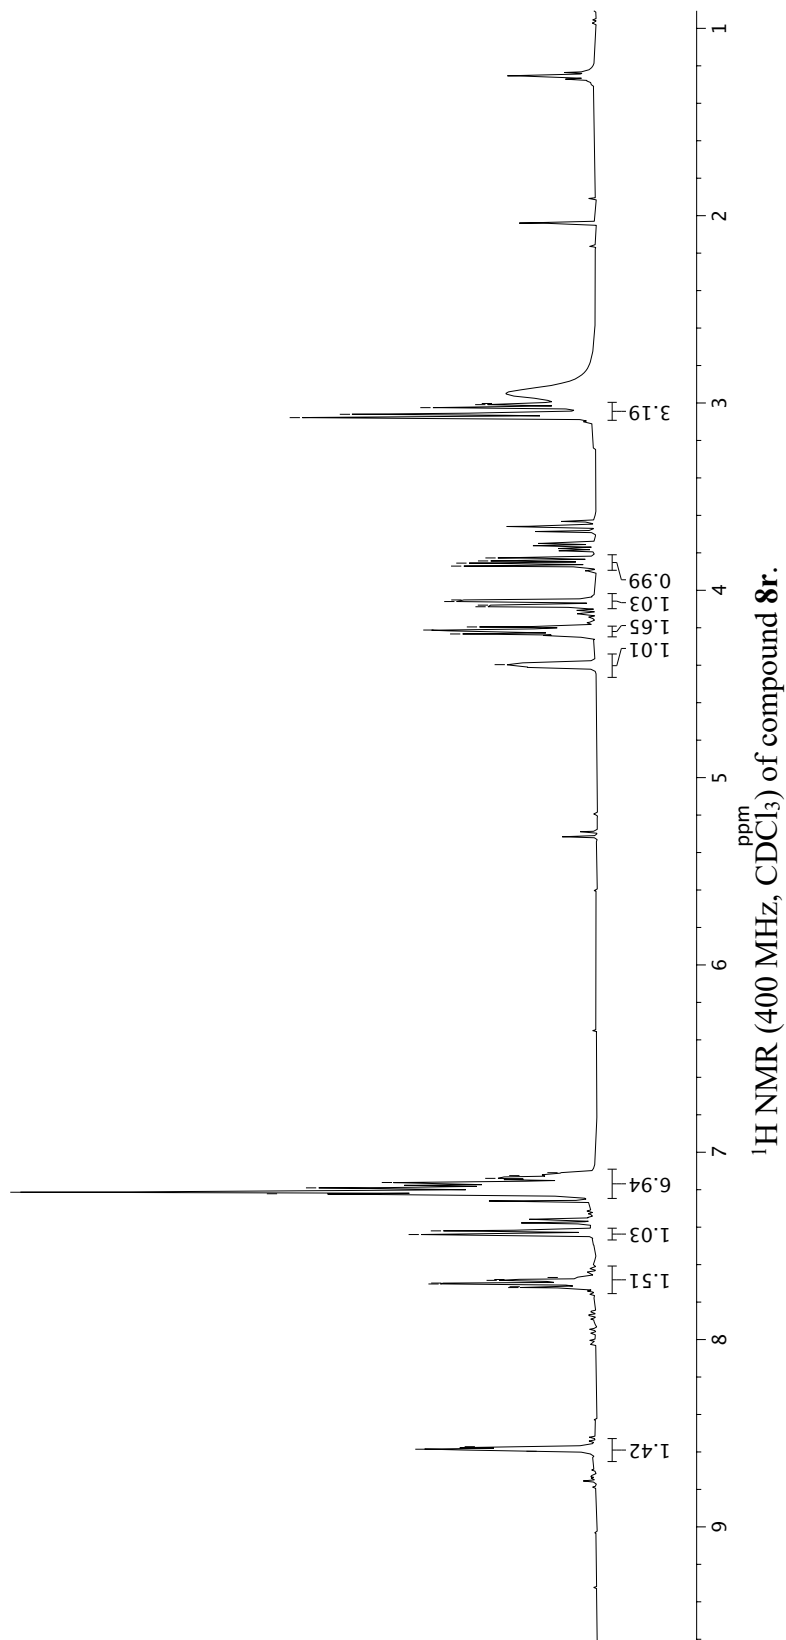



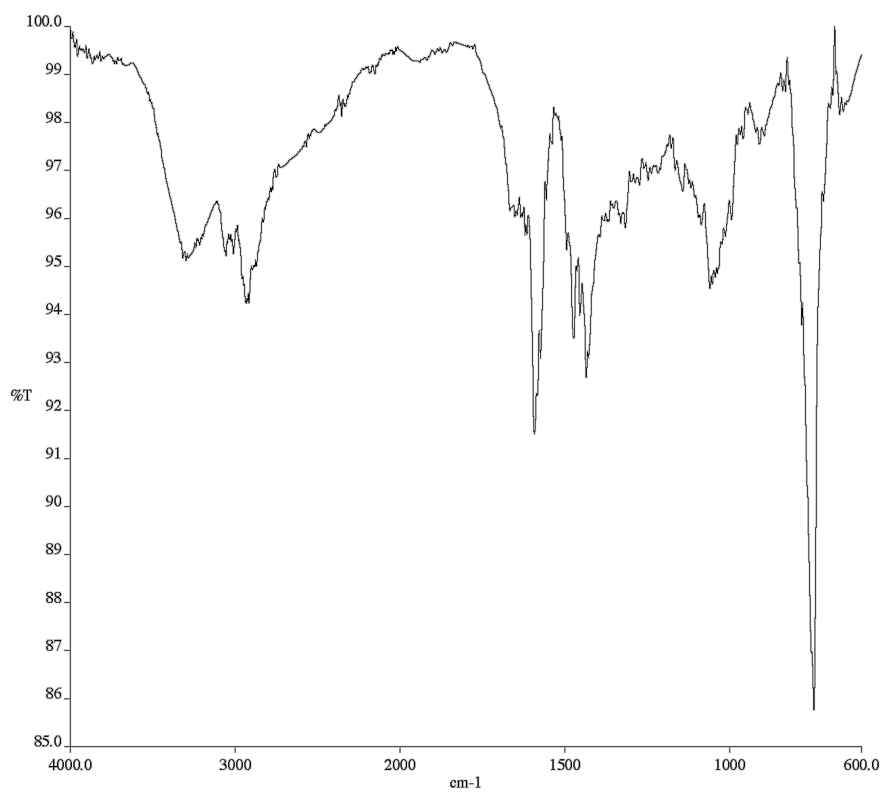

Infrared spectrum (Thin Film, NaCl) of compound **8r**.

—162.20      —149.36      136.96      136.03      135.27      129.44      126.71      126.51      125.36      122.55      121.08      —66.41      58.55      57.98      —36.52

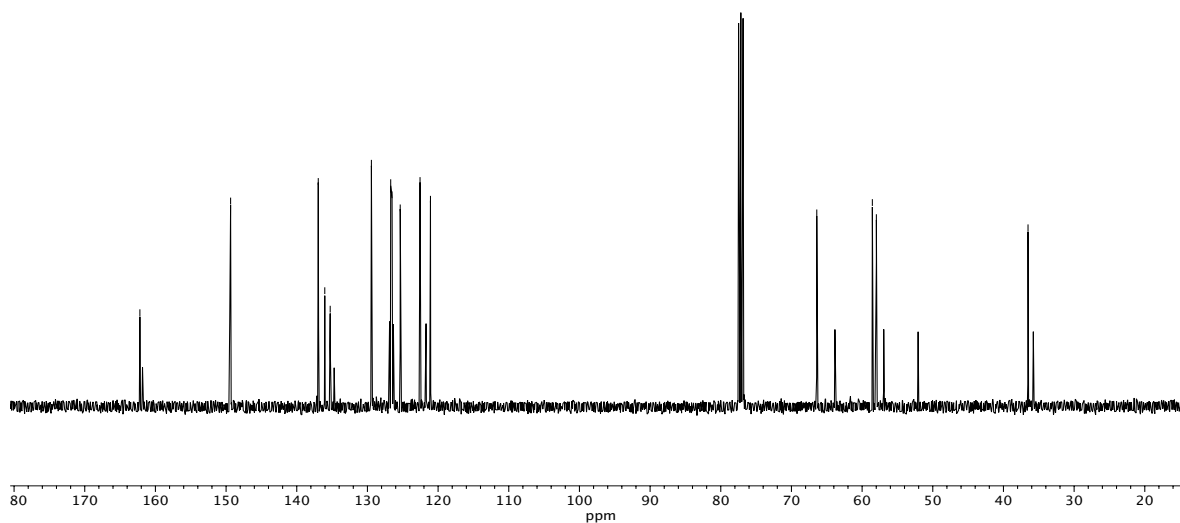

$^{13}\text{C}$  NMR (100 MHz,  $\text{CDCl}_3$ ) of compound **8r**.

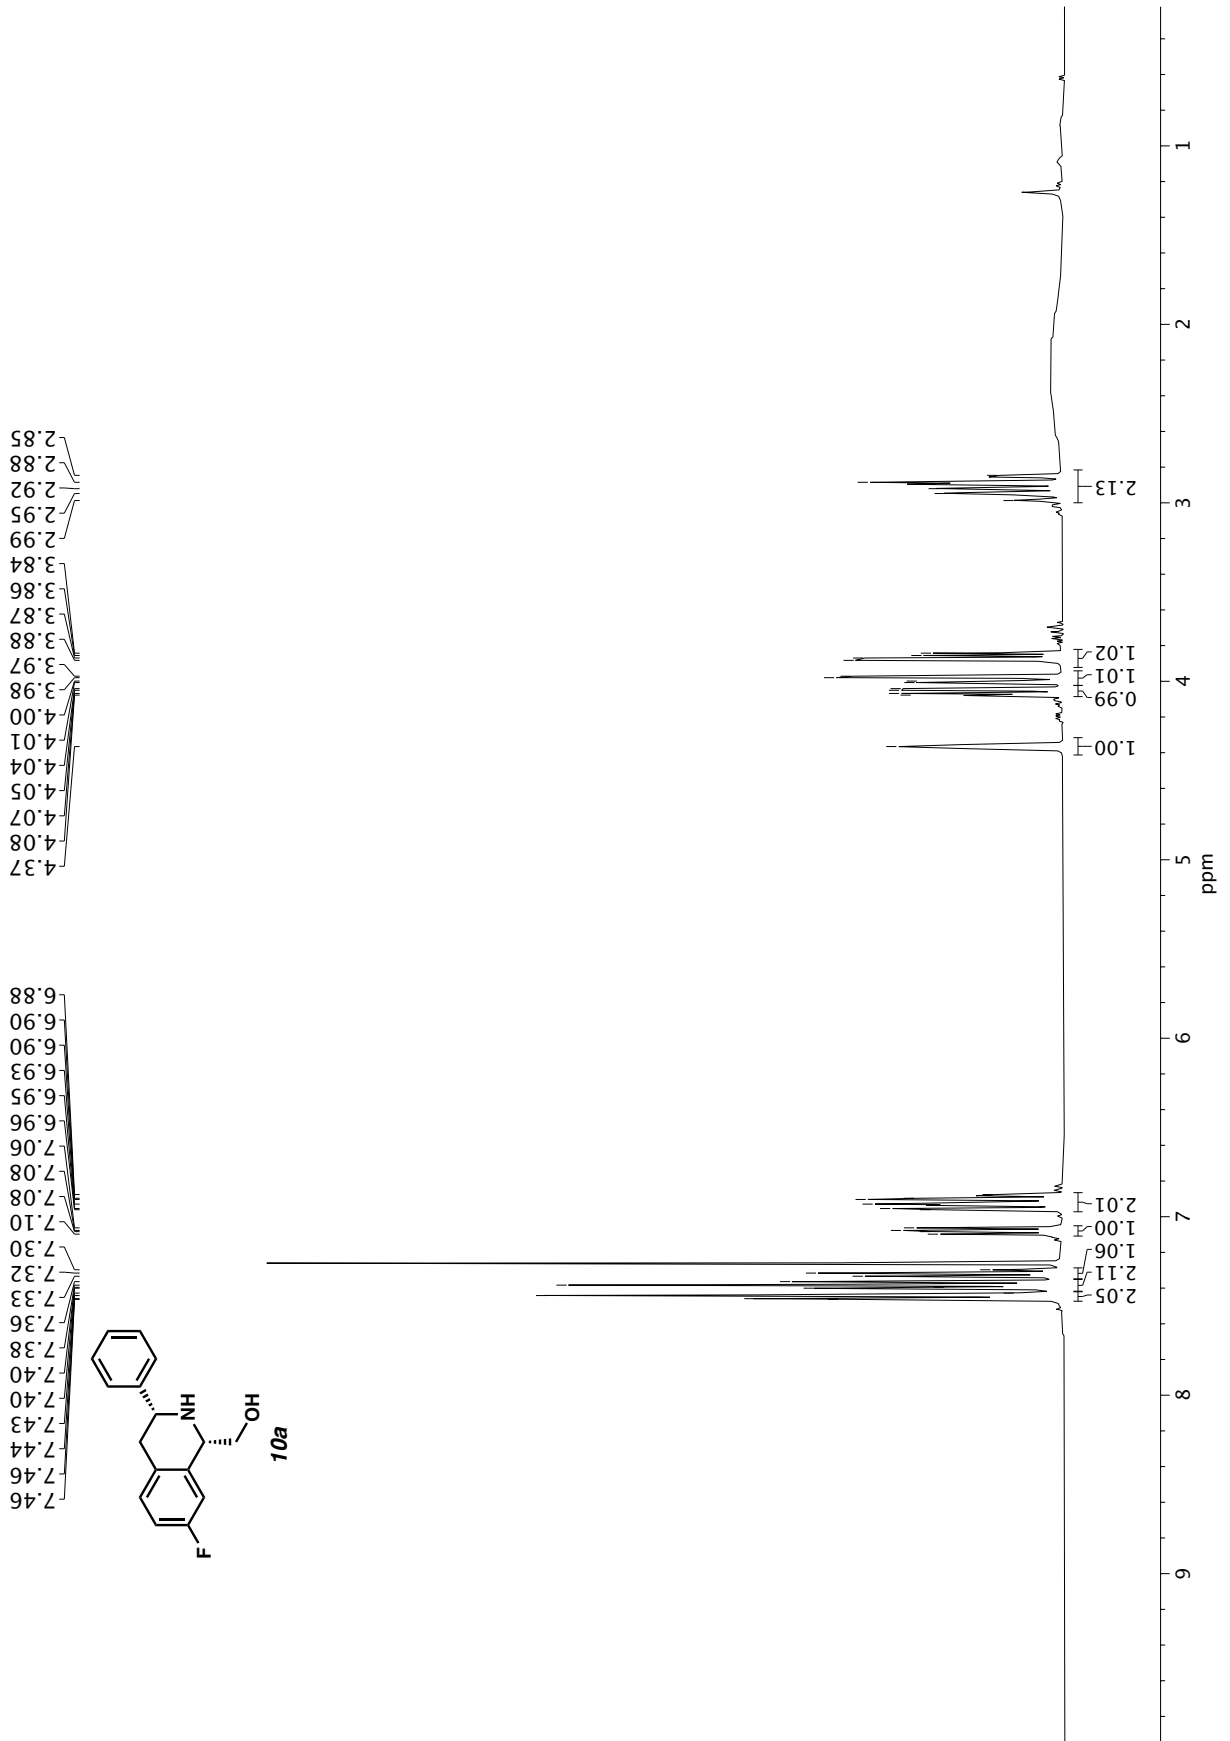

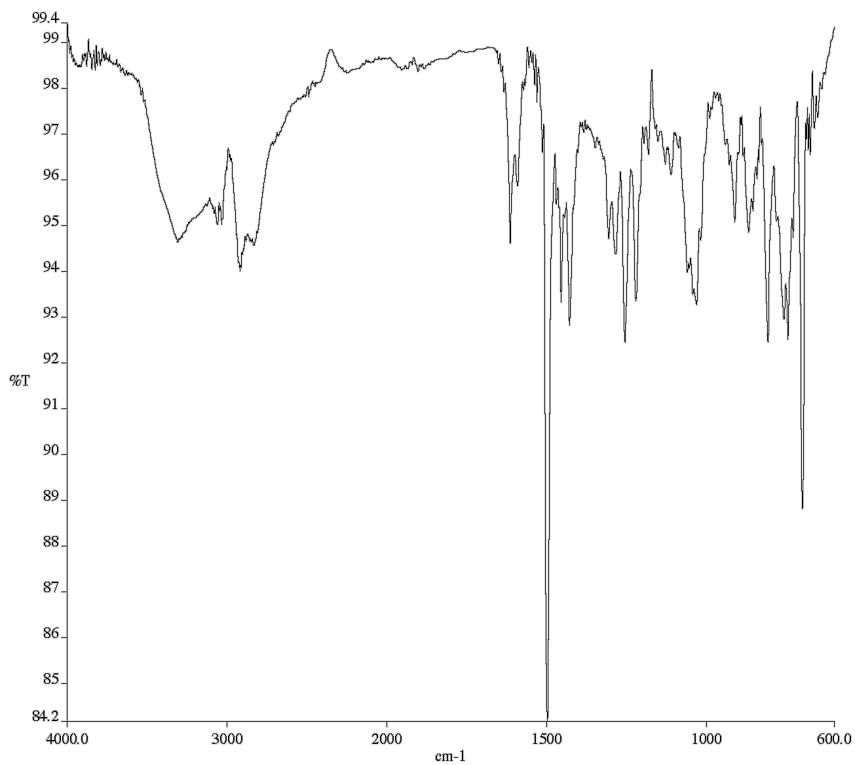

Infrared spectrum (Thin Film, NaCl) of compound **10a**.

— 162.76  
 — 160.33  
 — 143.98  
 — 136.93  
 — 136.86  
 — 132.18  
 — 132.15  
 — 130.66  
 — 130.58  
 — 128.80  
 — 127.82  
 — 126.80  
 — 113.96  
 — 113.75  
 — 112.23  
 — 112.01  
 — 66.42  
 — 58.64  
 — 58.62  
 — 57.74  
 — 38.23

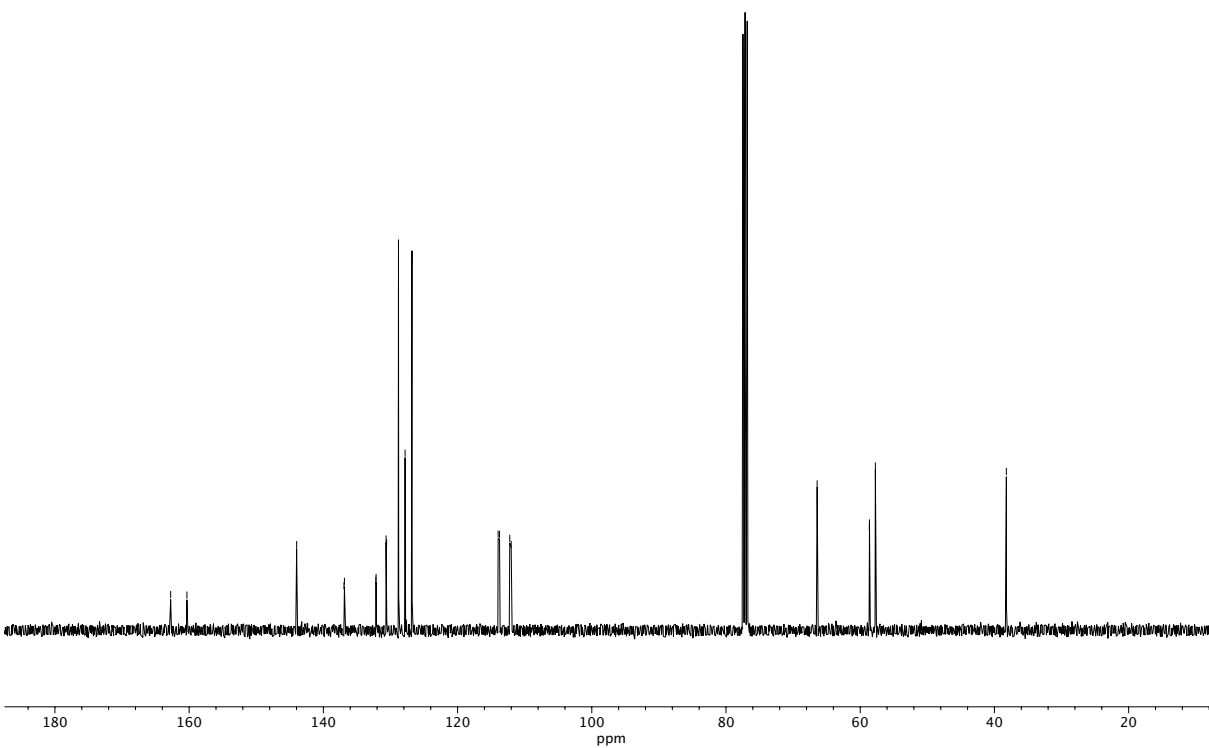

$^{13}\text{C}$  NMR (100 MHz,  $\text{CDCl}_3$ ) of compound **10a**.

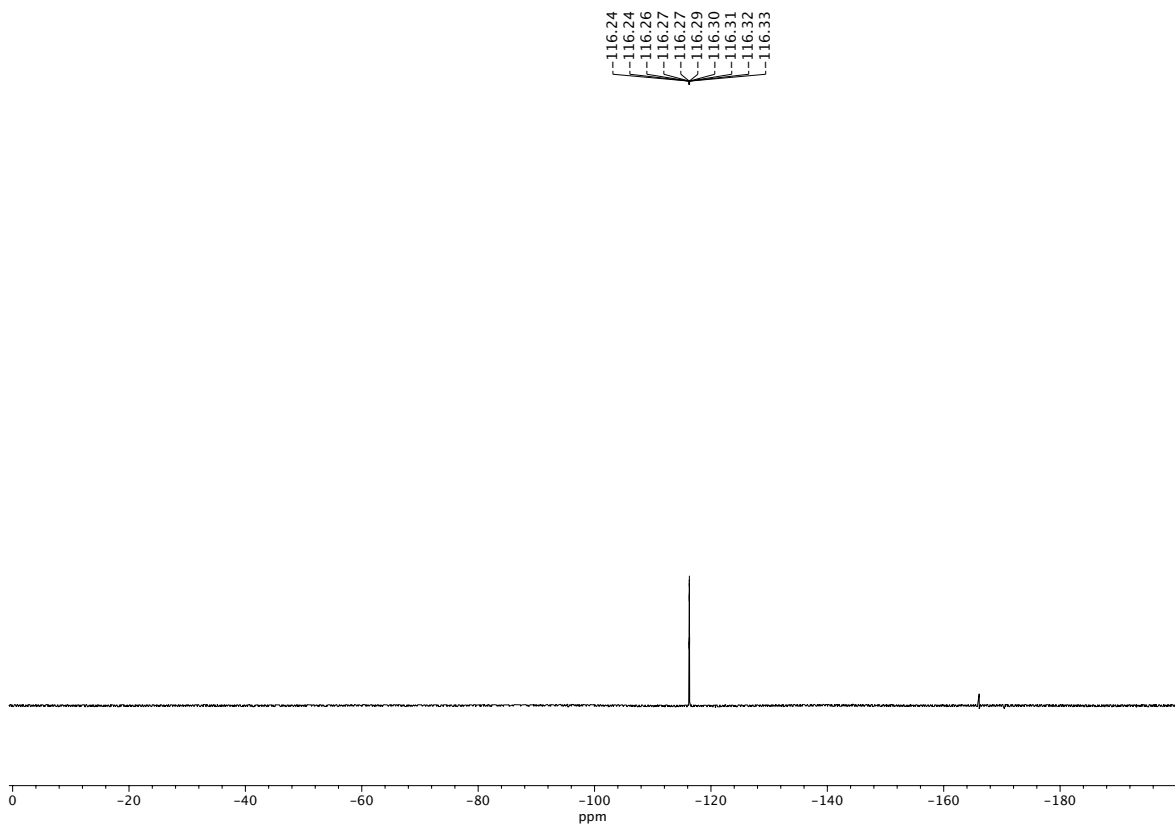

$^{19}\text{F}$  NMR (282 MHz,  $\text{CDCl}_3$ ) of **10a**.

4.35  
4.02  
4.01  
3.99  
3.98  
3.96  
3.95  
3.85  
3.82

7.37  
7.35  
7.09  
7.07  
7.07  
7.05  
6.95  
6.94  
6.92  
6.90  
6.89  
6.87  
6.87

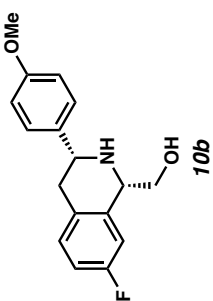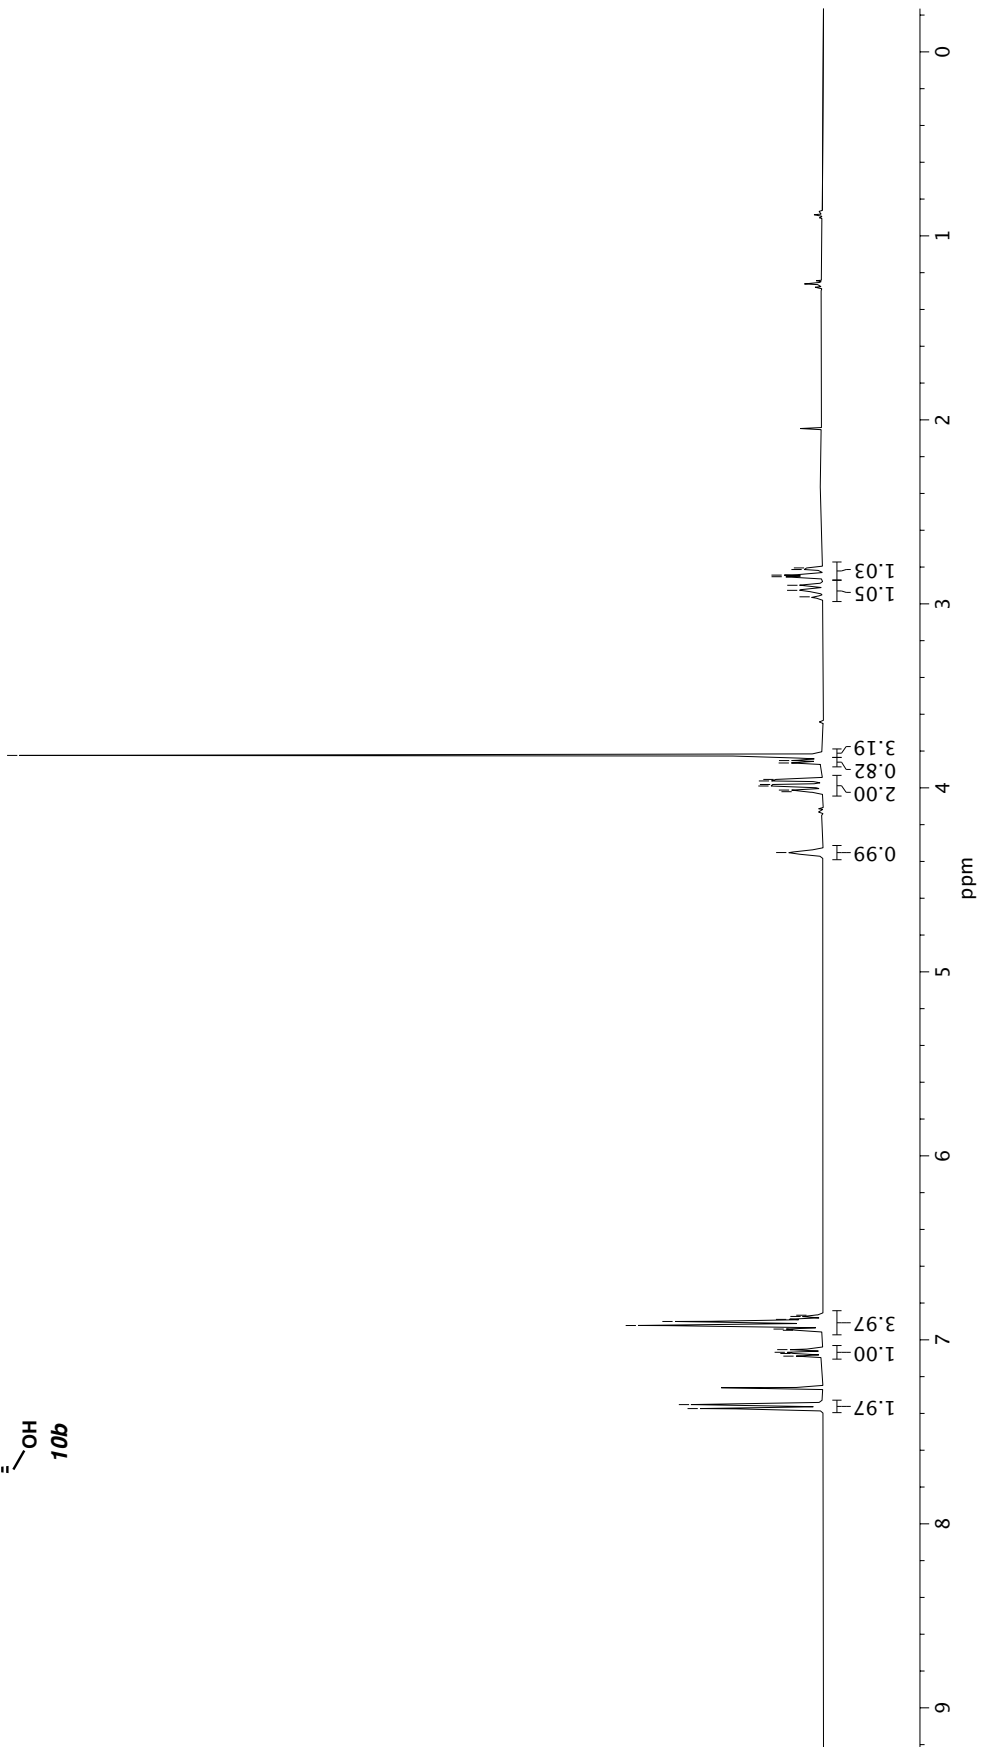

<sup>1</sup>H NMR (400 MHz, CDCl<sub>3</sub>) of compound **10b**.

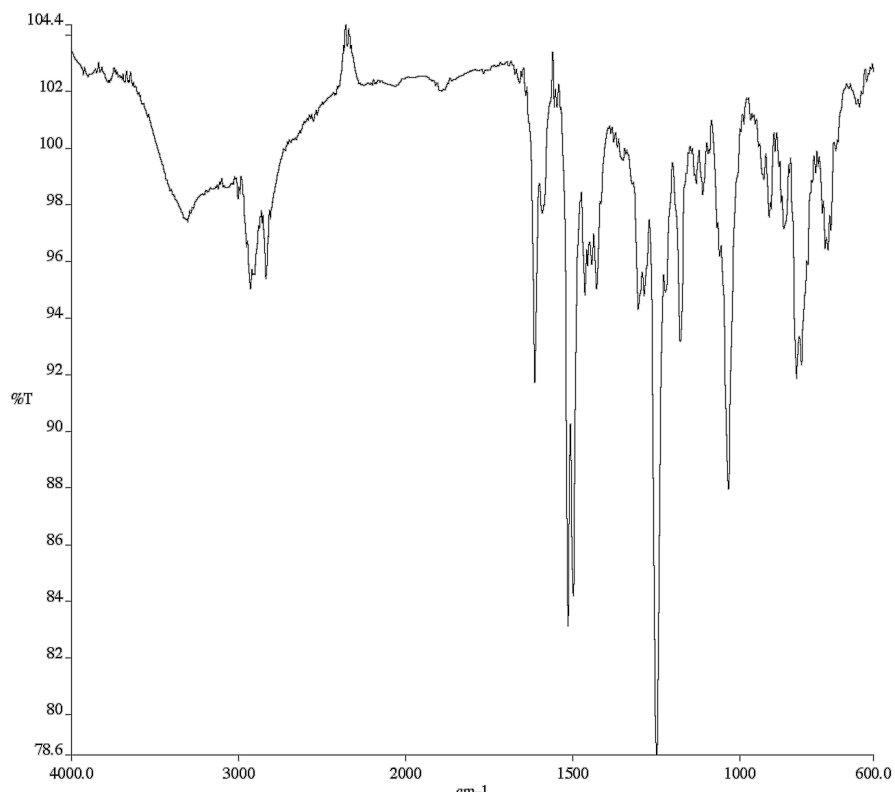

Infrared spectrum (Thin Film, NaCl) of compound **10b**.

- ~162.74
- ~160.31
- ~159.21
- 136.93
- 136.87
- 136.18
- 132.25
- 130.64
- 130.57
- 127.90
- 114.12
- 113.92
- 113.71
- 112.21
- 112.00
- 66.42
- 58.67
- 58.65
- 57.11
- 55.47
- 38.26

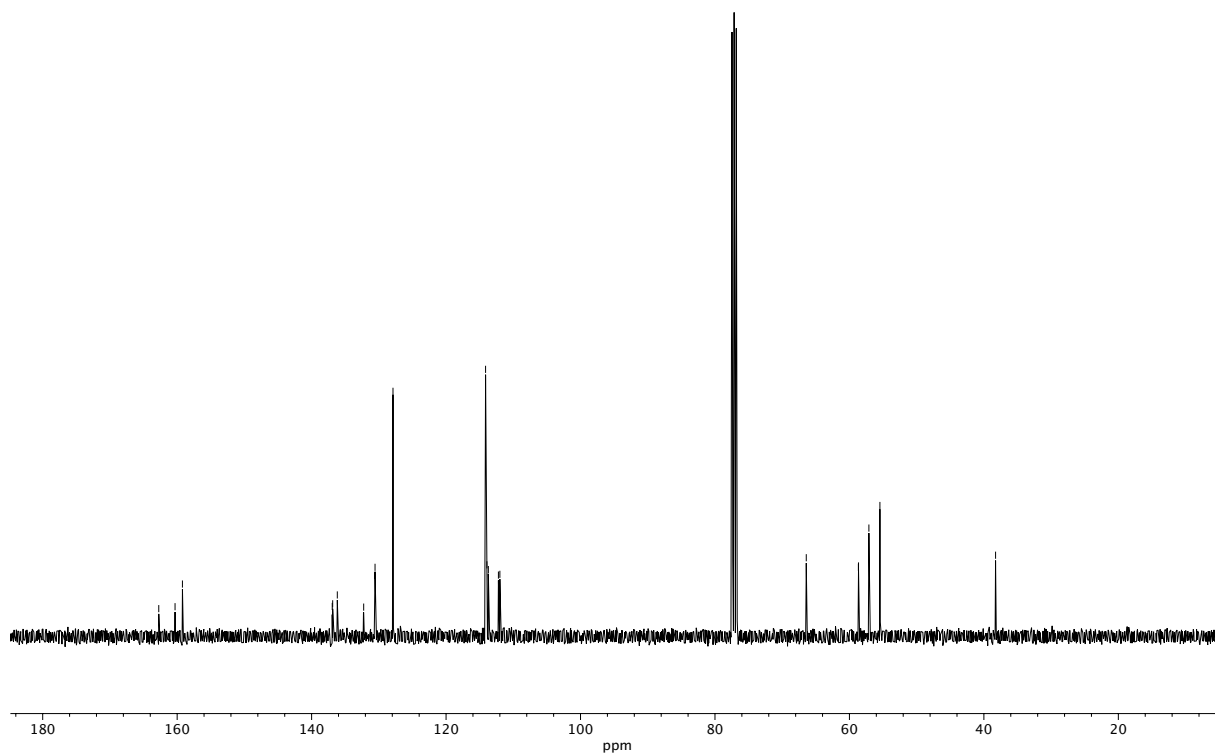

<sup>13</sup>C NMR (100 MHz, CDCl<sub>3</sub>) of compound **10b**.

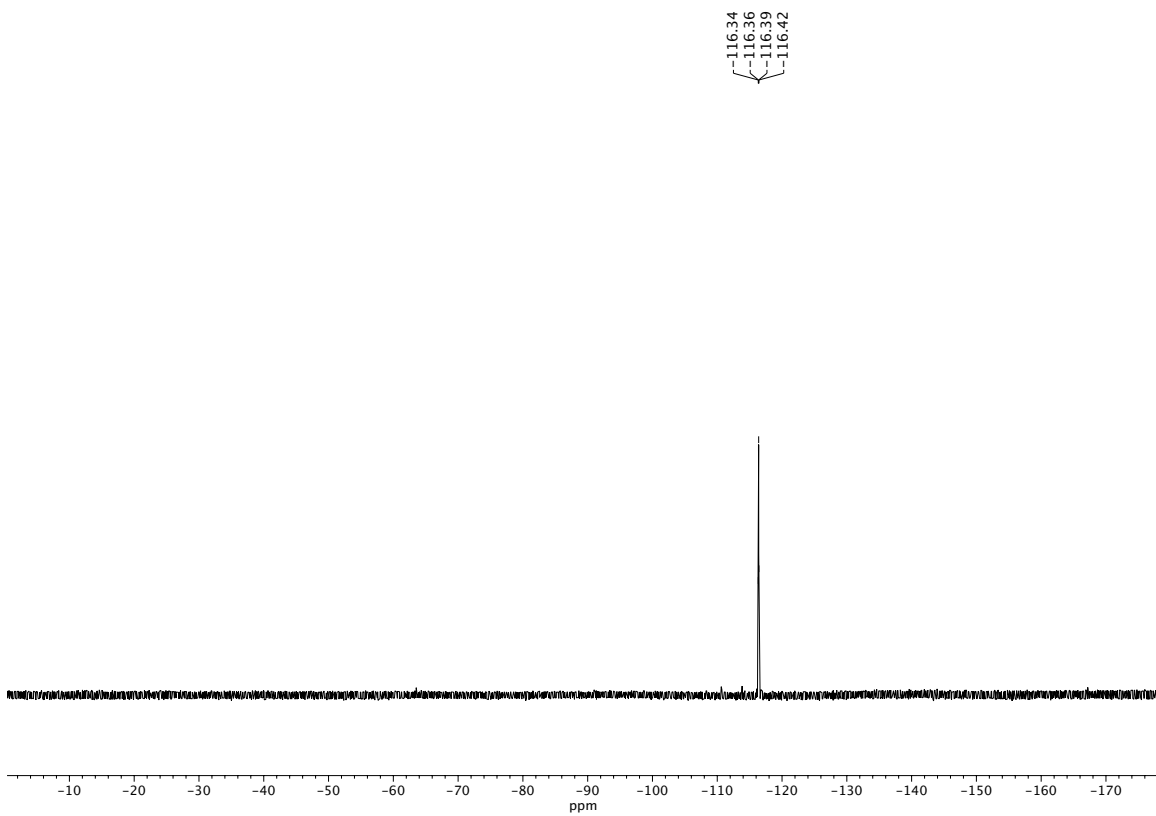

$^{19}\text{F}$  NMR (282 MHz,  $\text{CDCl}_3$ ) of **10b**.

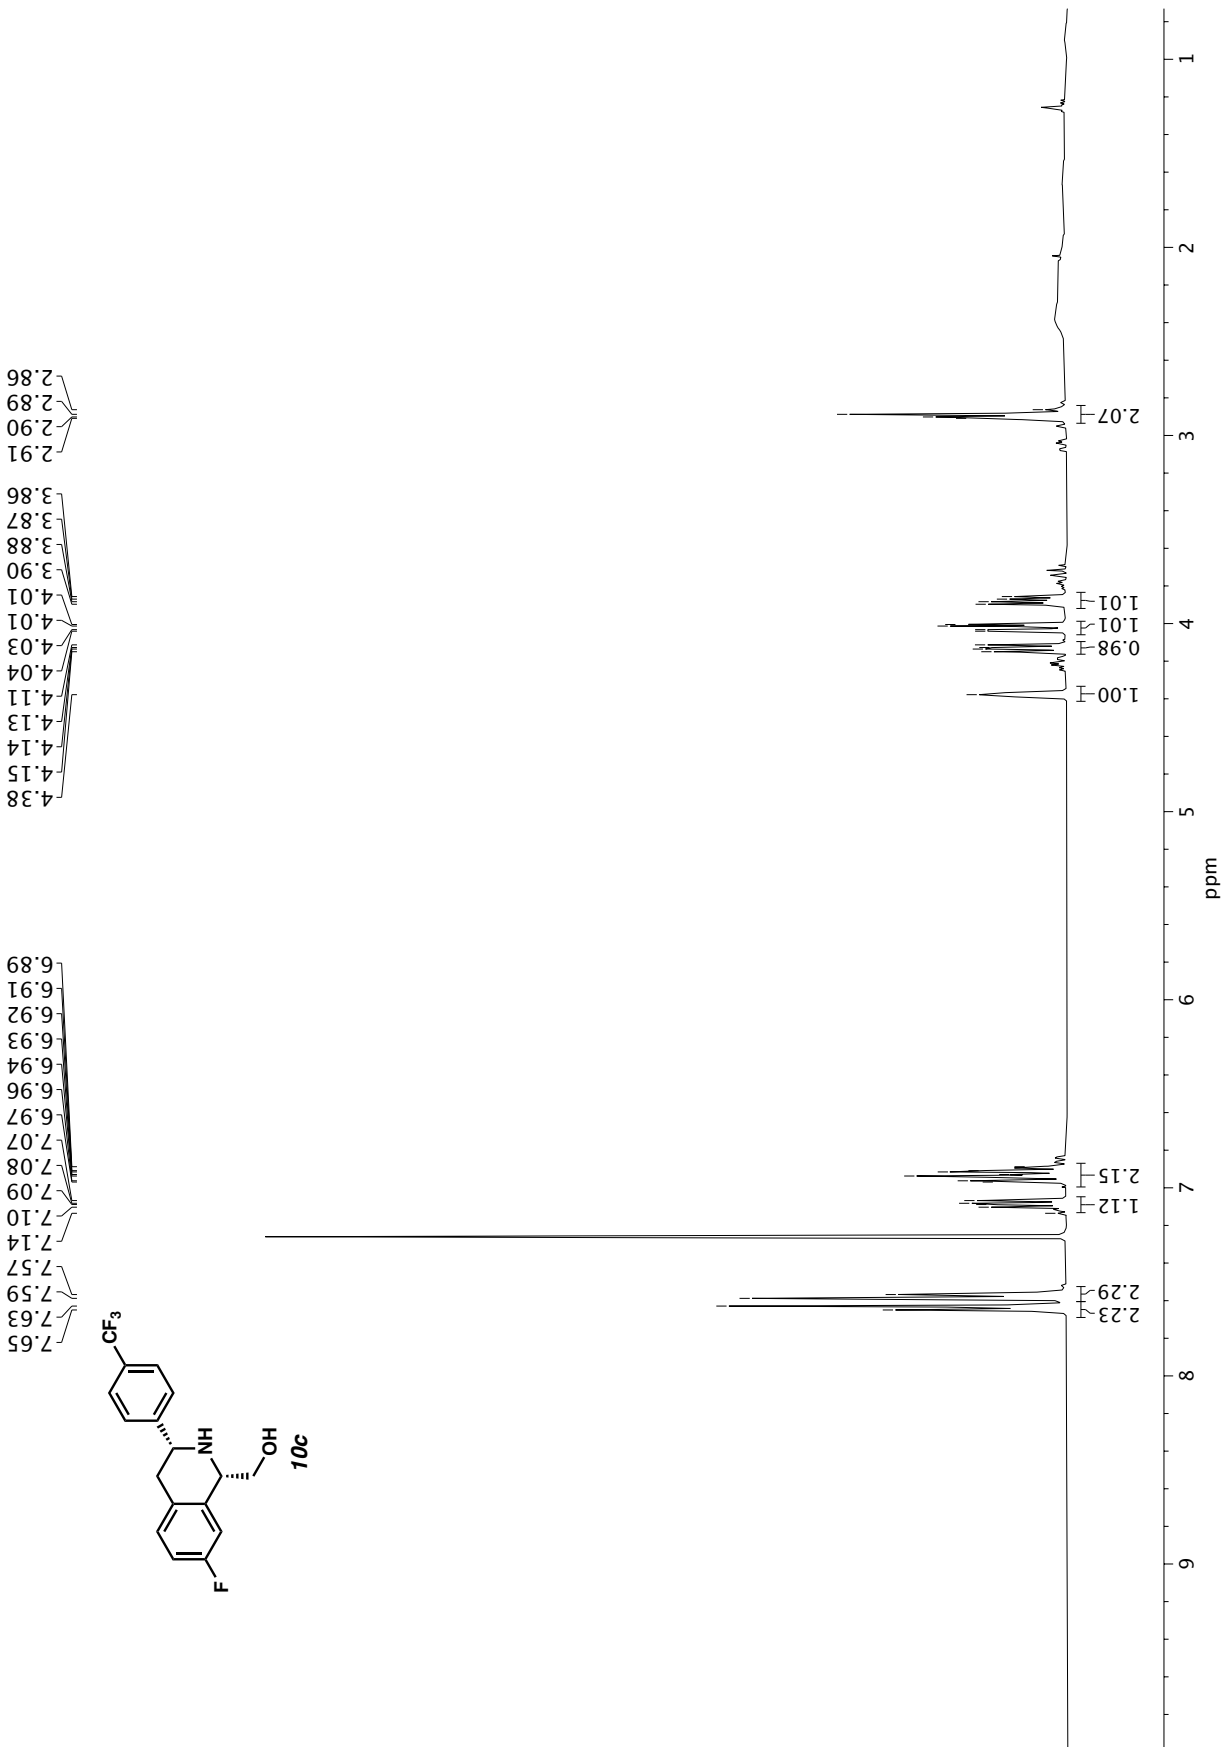



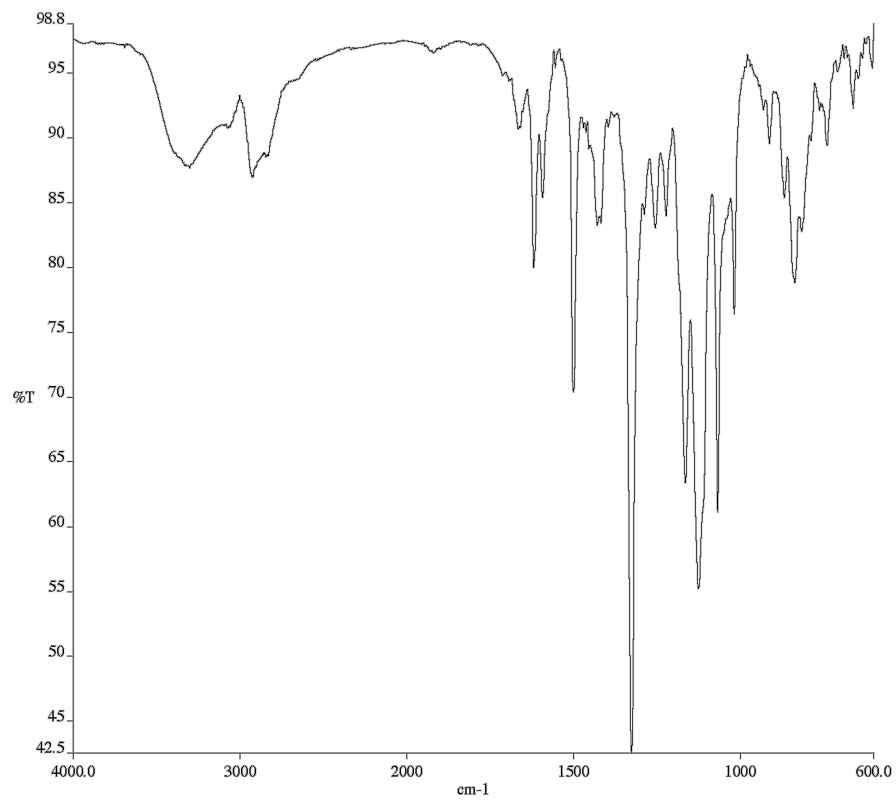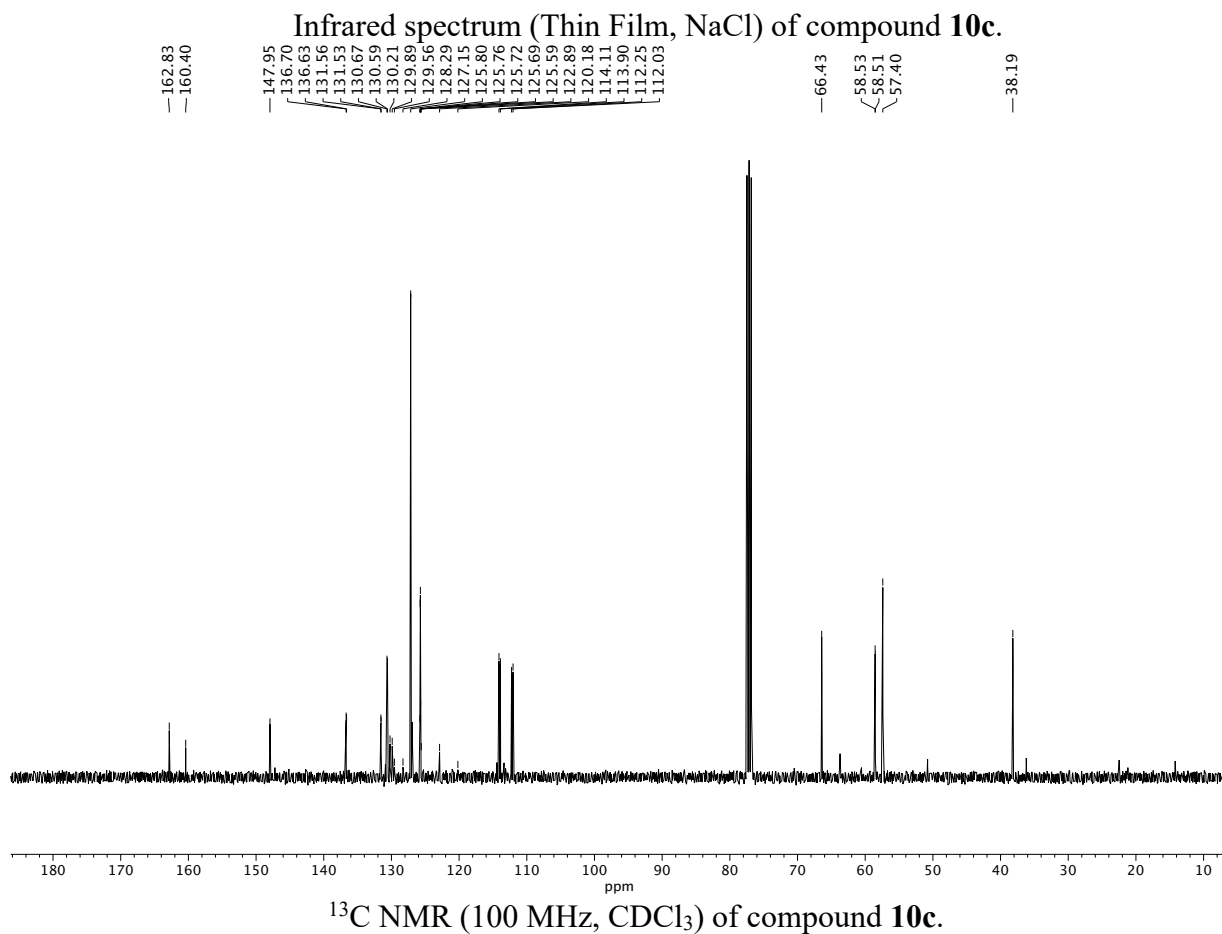

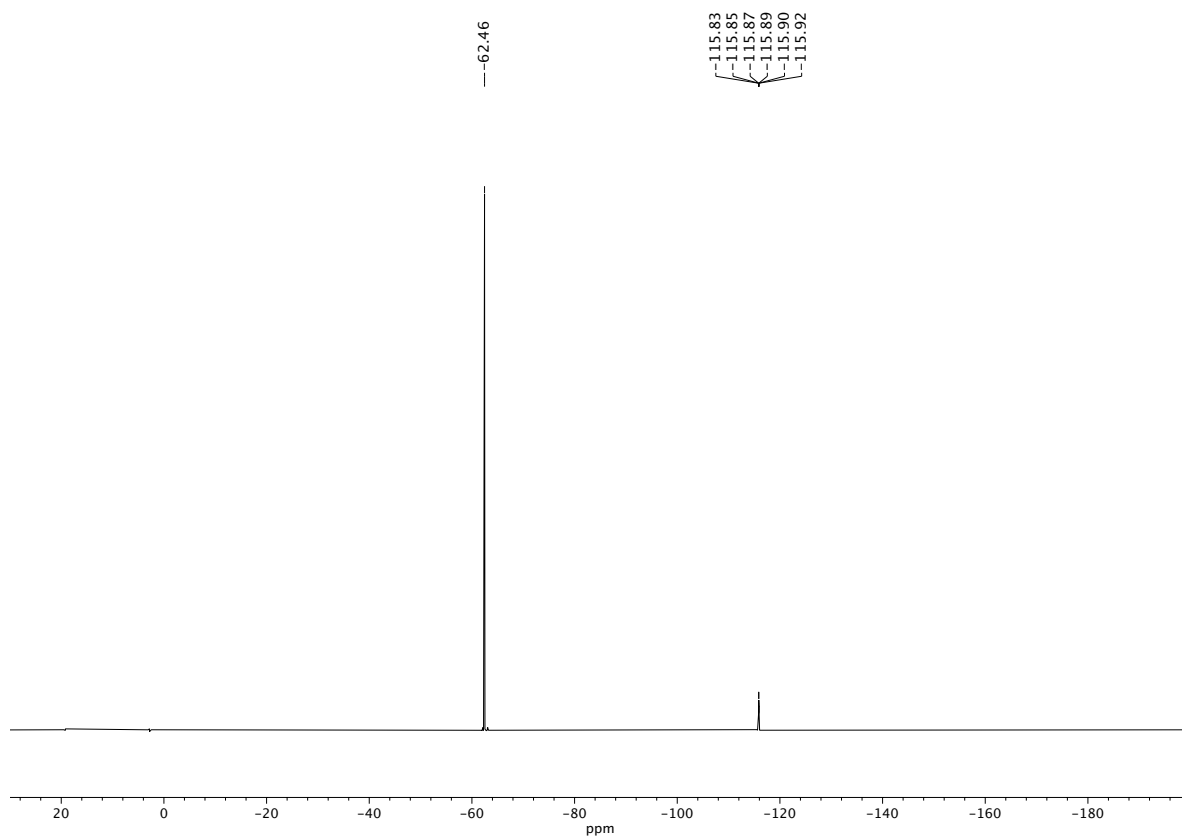

$^{19}\text{F}$  NMR (282 MHz,  $\text{CDCl}_3$ ) of **10c**.

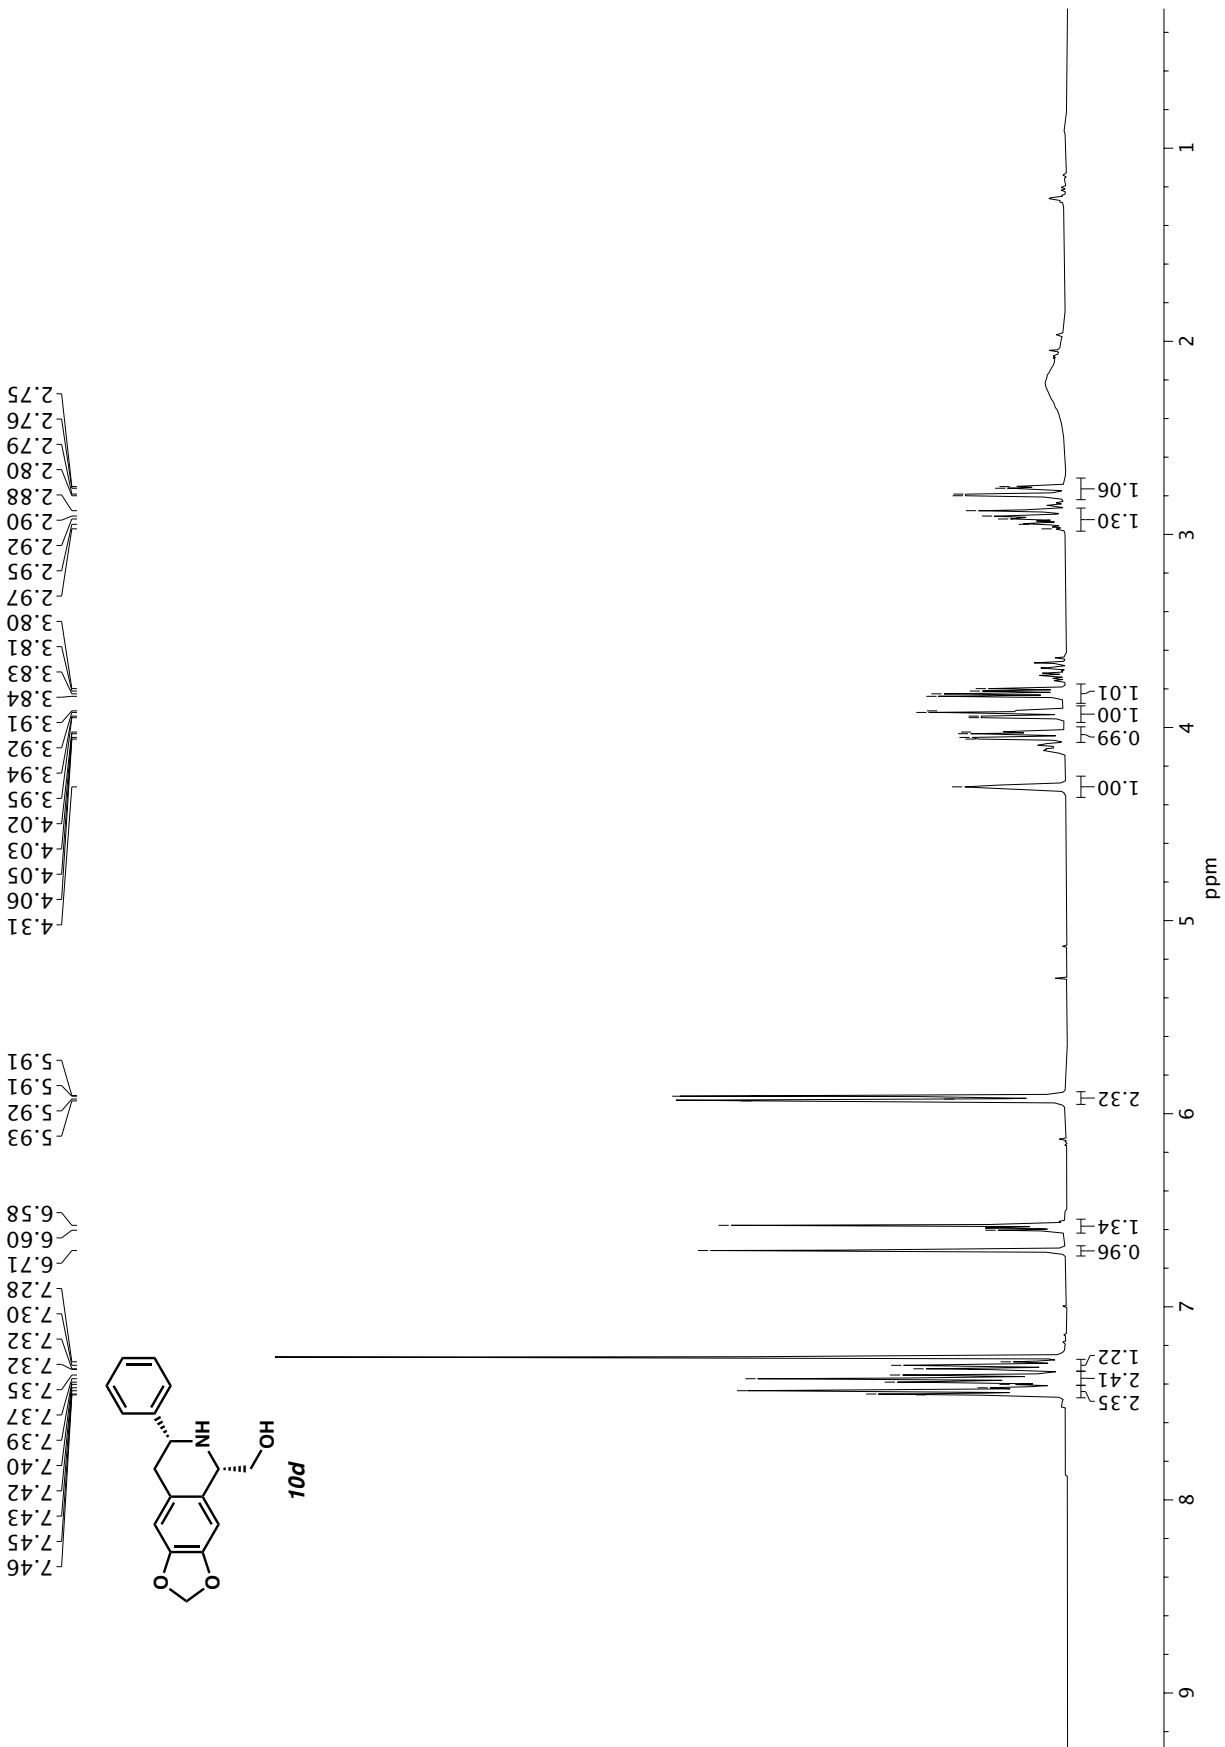

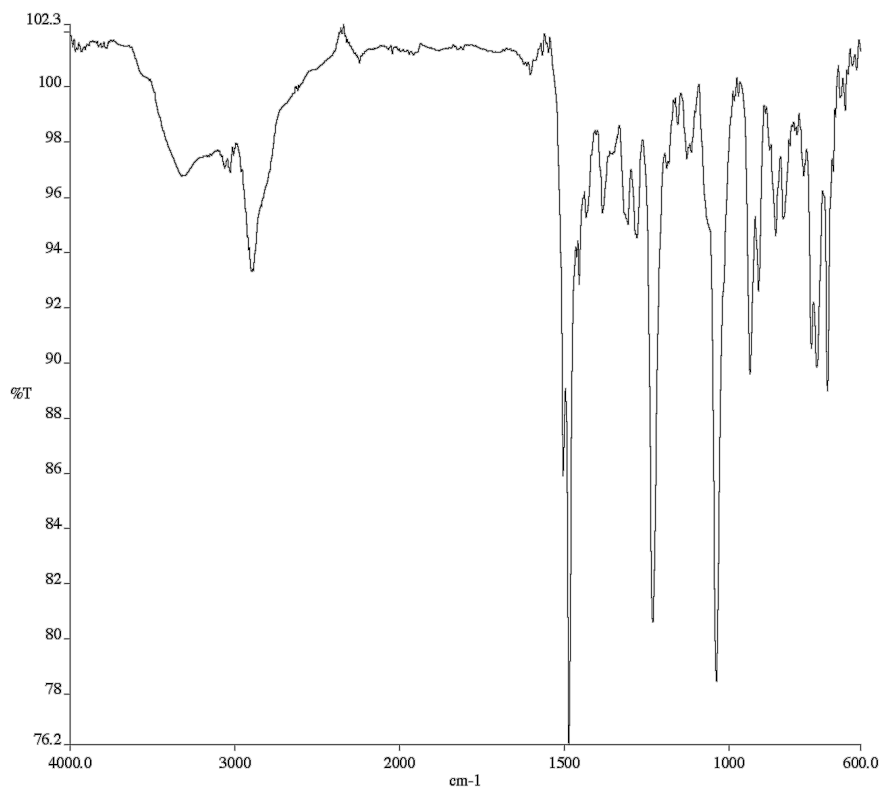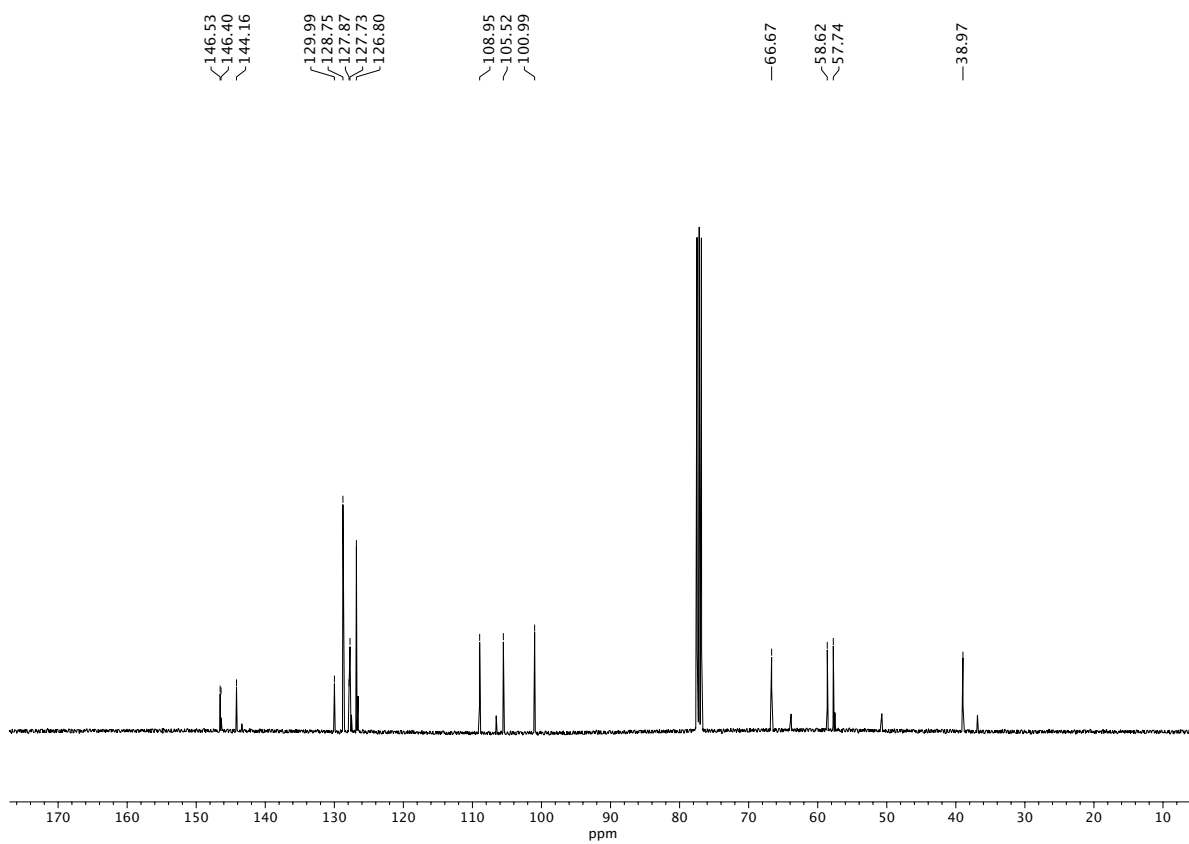



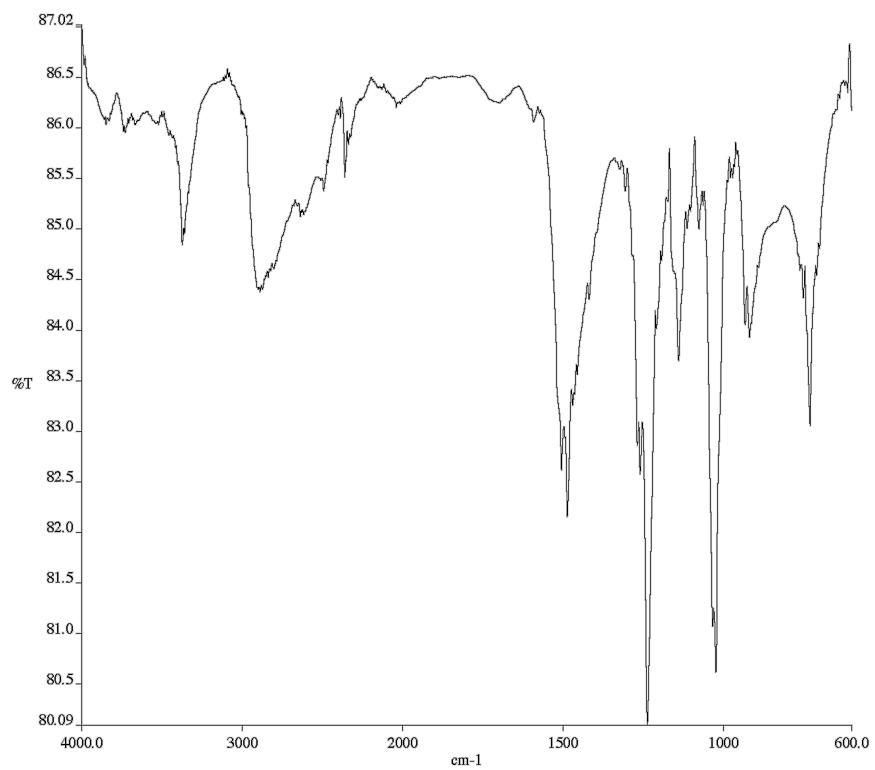

Infrared spectrum (Thin Film, NaCl) of compound **10e**.

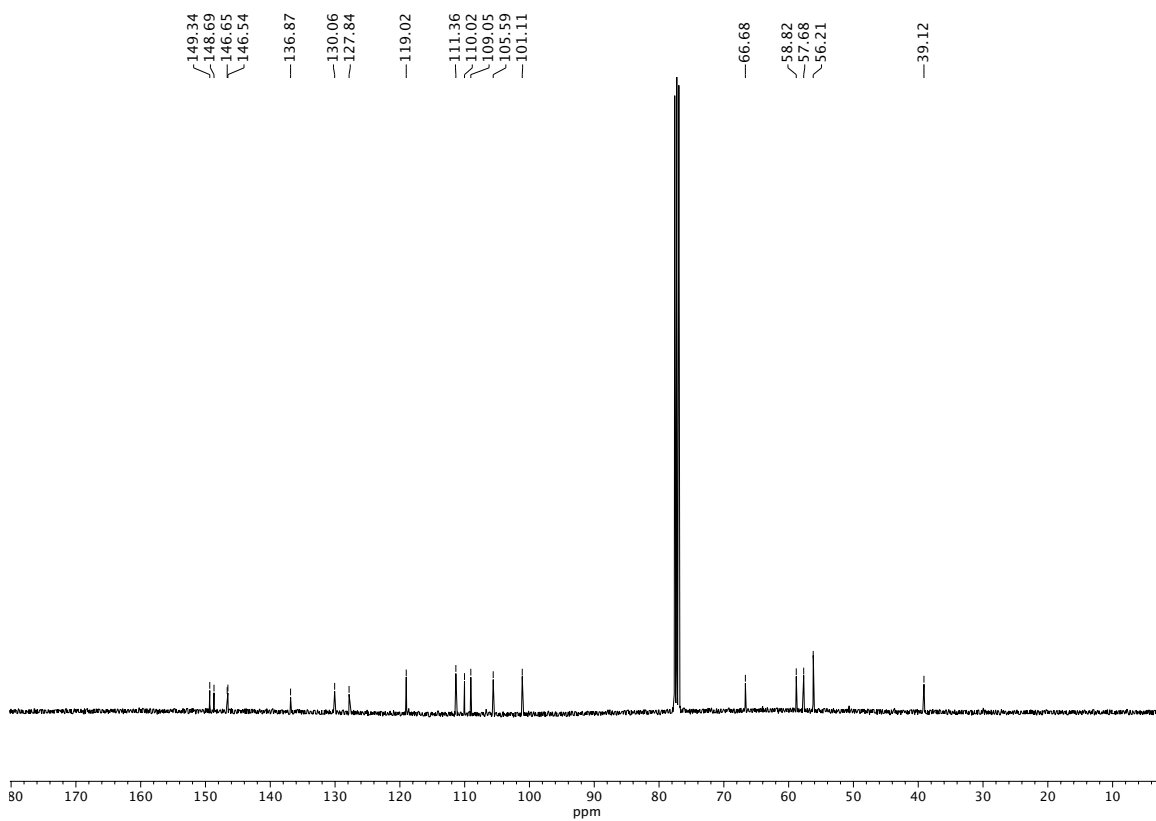

<sup>13</sup>C NMR (100 MHz, CDCl<sub>3</sub>) of compound **10e**.

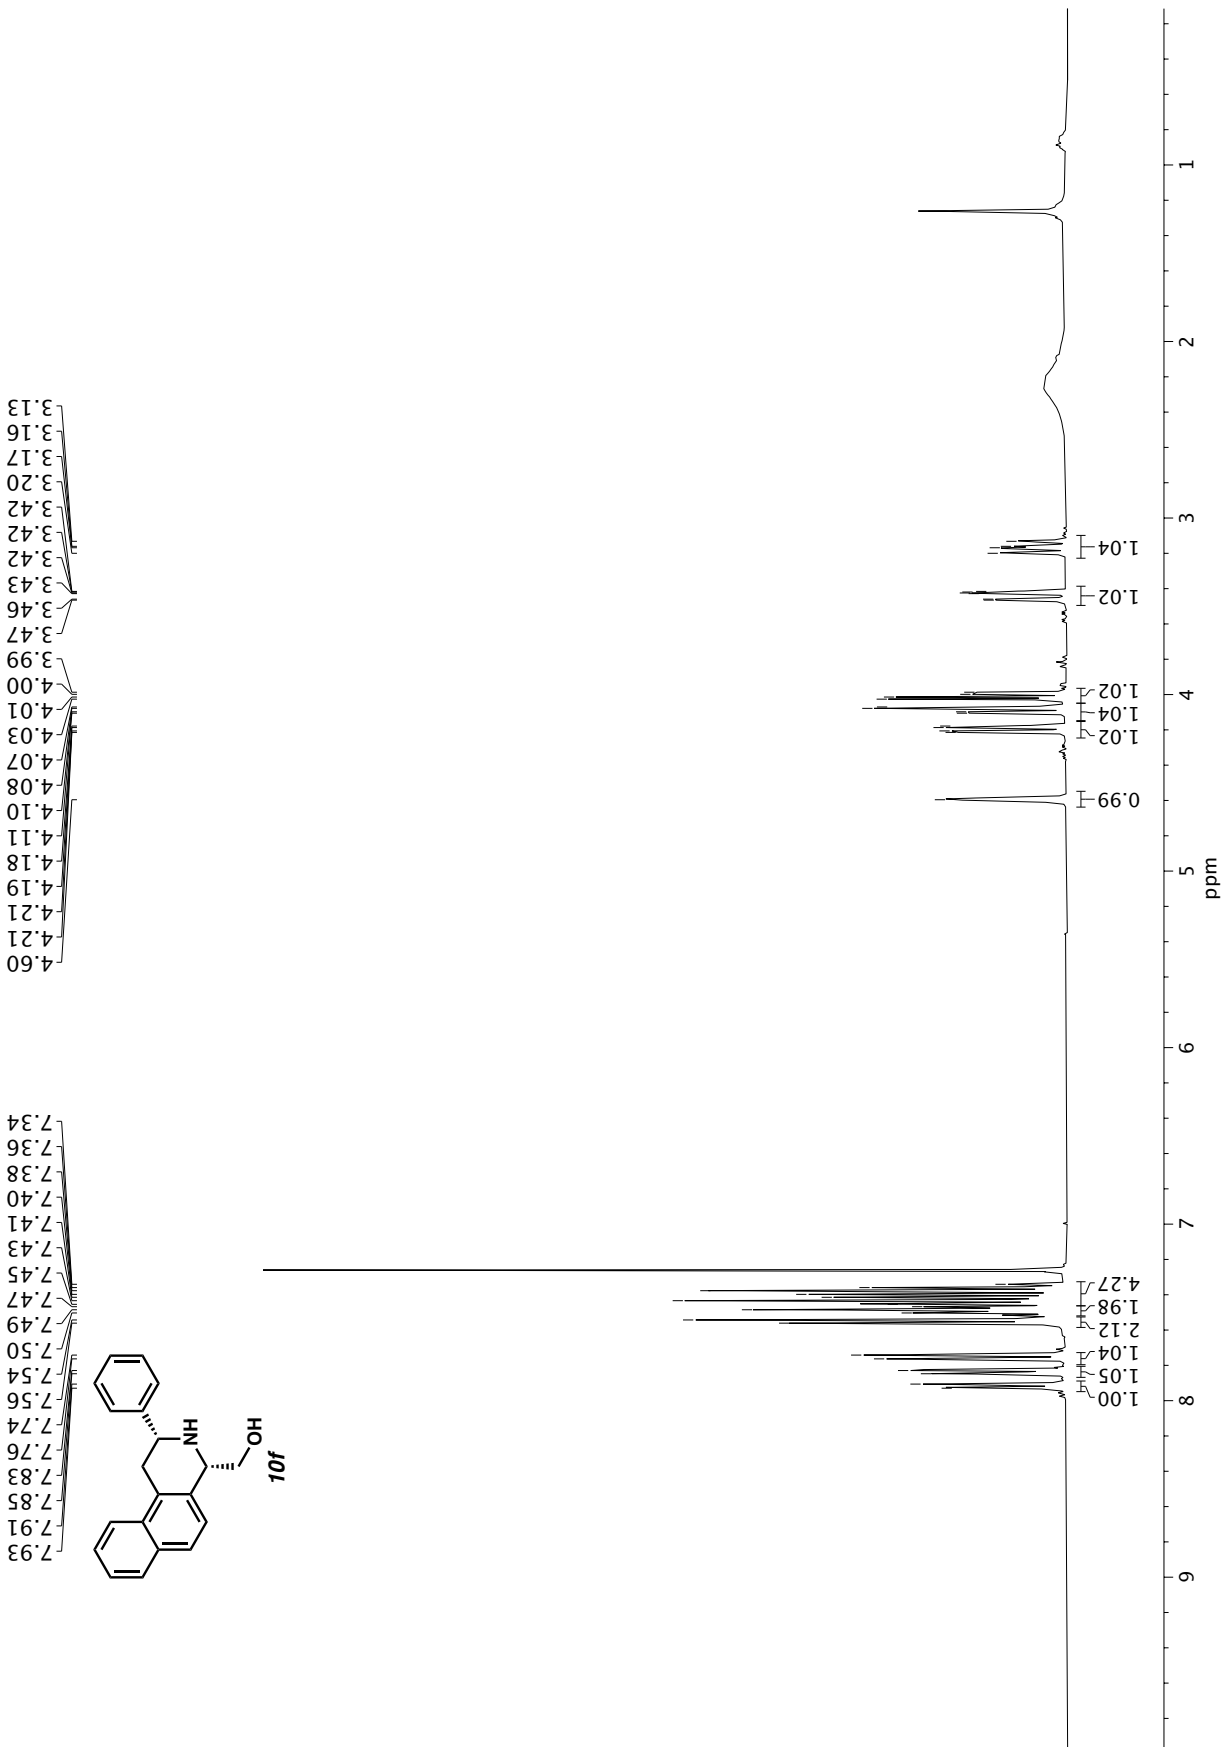

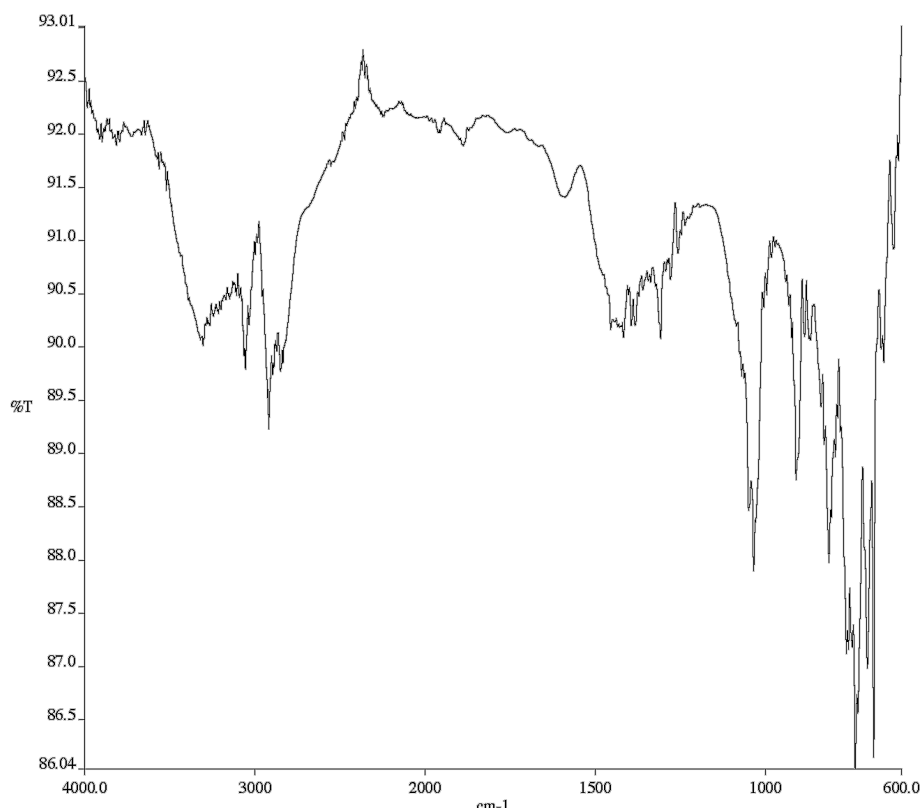

144.41      66.38  
 132.21      59.07  
 132.12      57.56  
 132.02  
 131.89  
 128.75  
 128.42  
 127.74  
 126.84  
 126.71  
 126.20  
 125.55  
 123.37  
 122.94  
 35.44

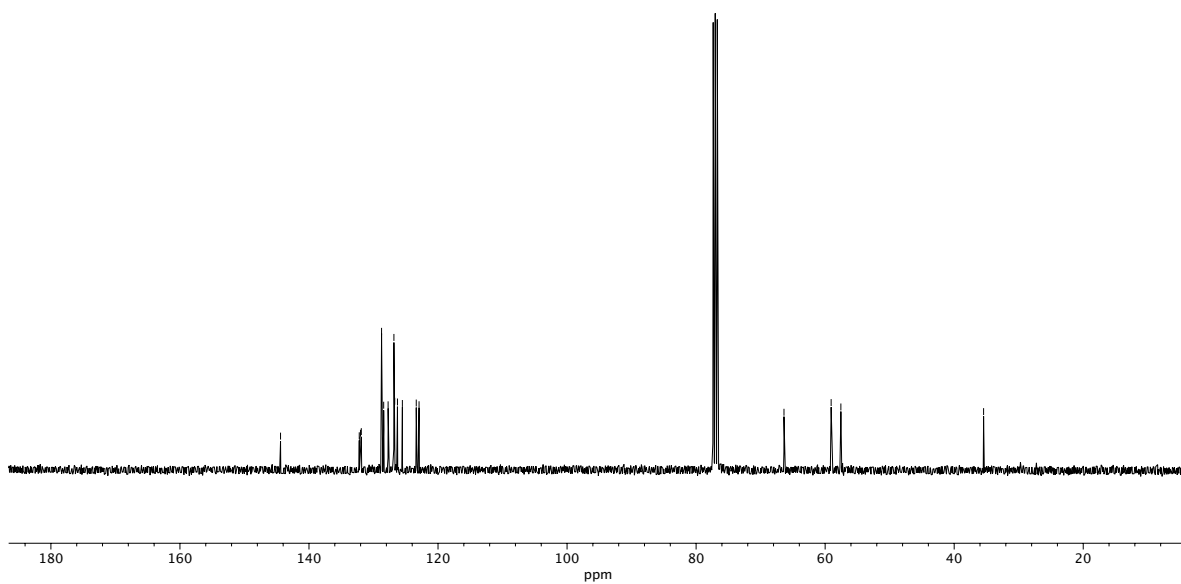



<sup>1</sup>H NMR (400 MHz, CDCl<sub>3</sub>) of compound **12a**.

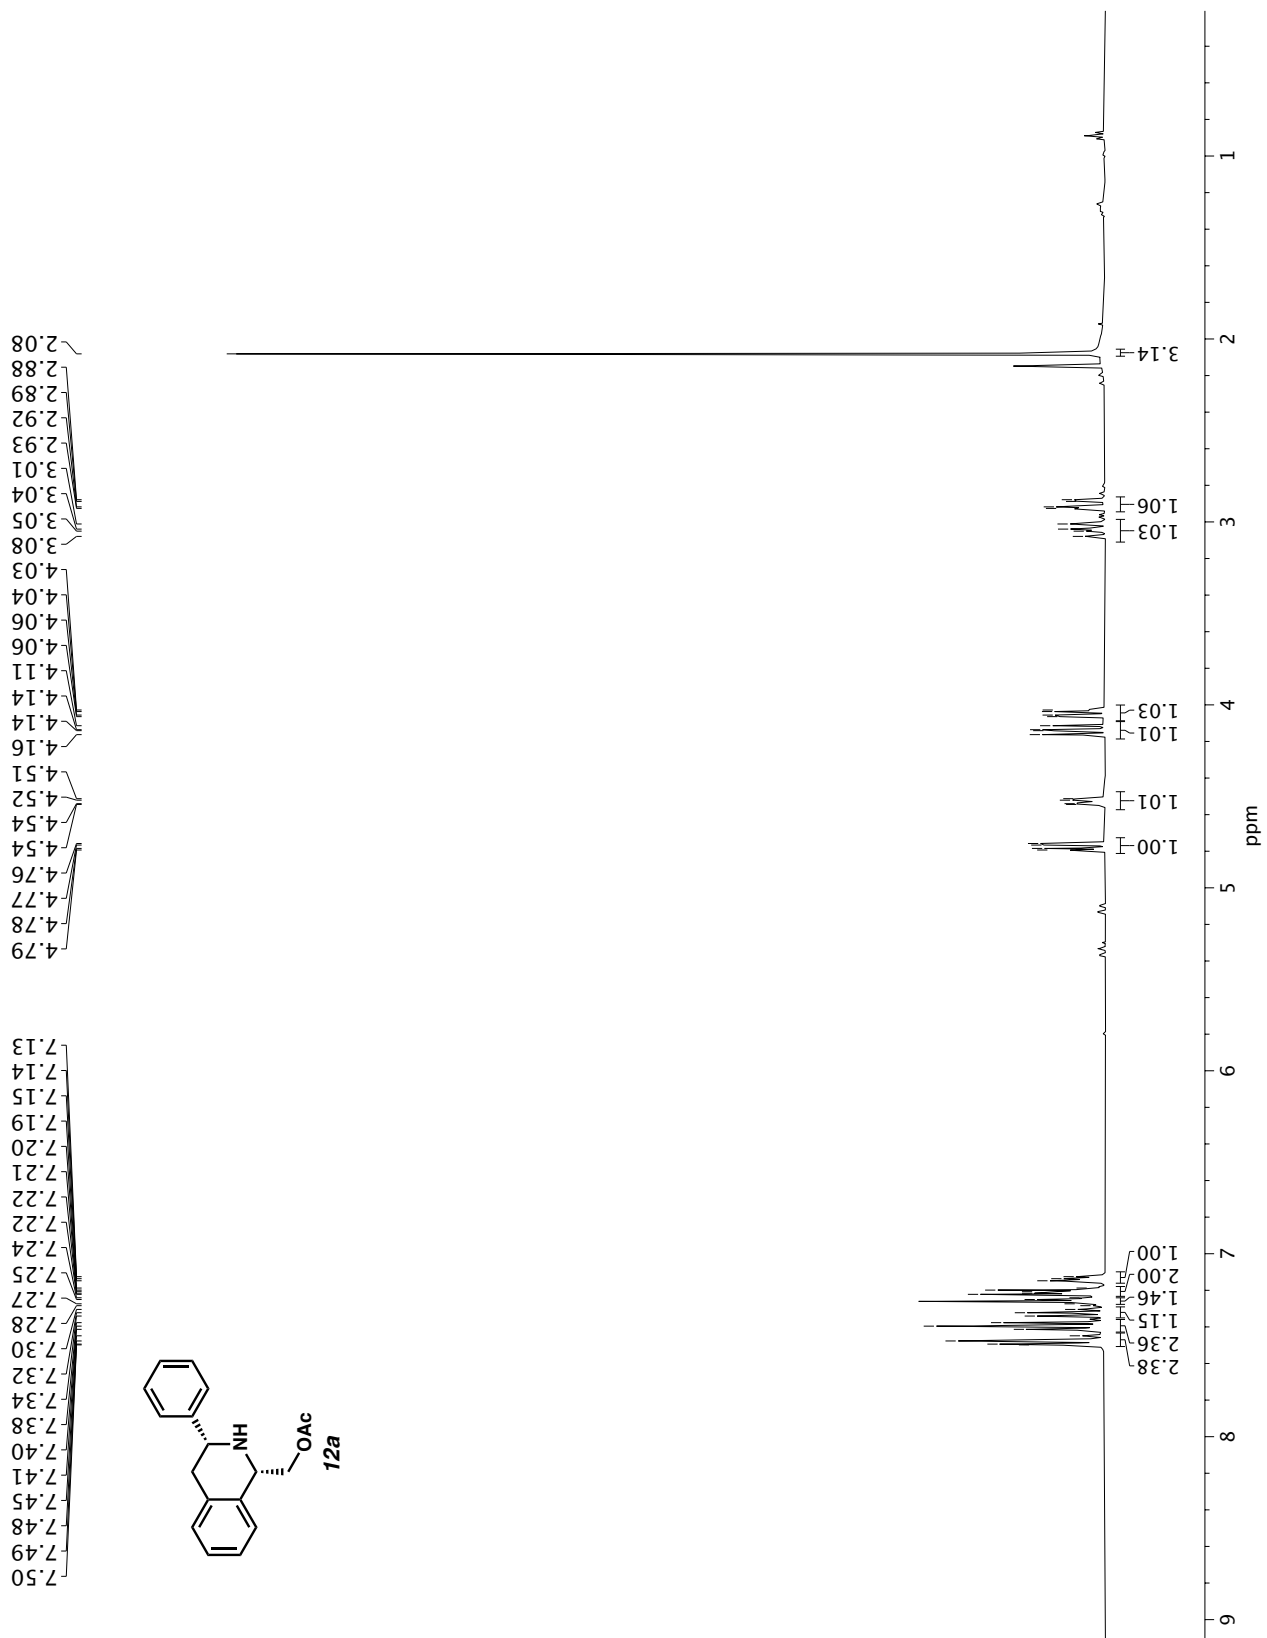

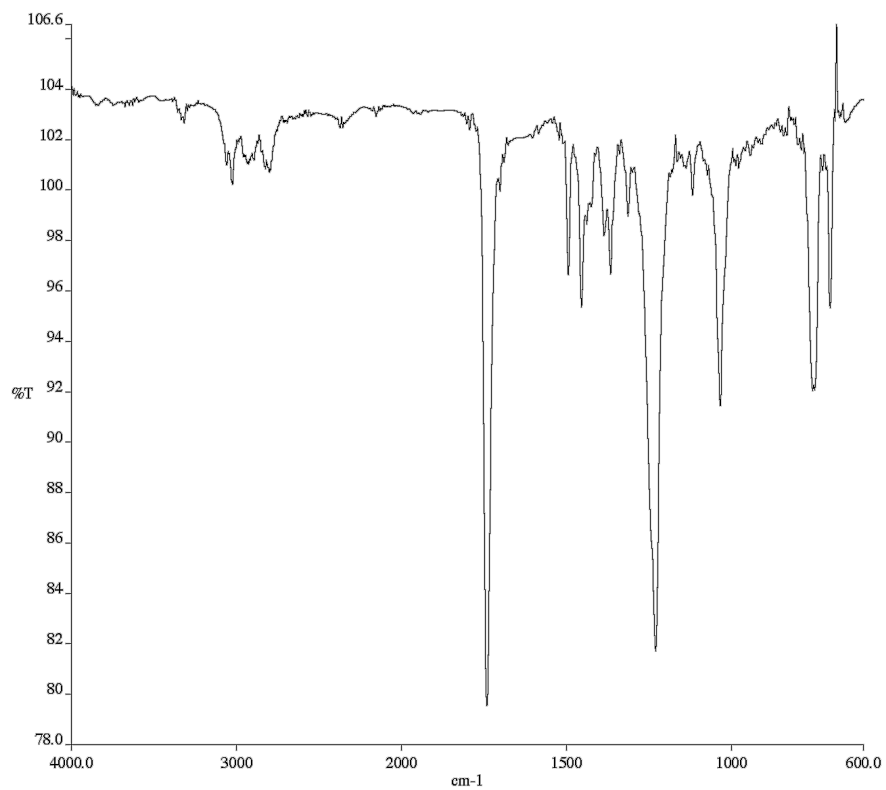

—171.13  
—144.37  
—136.34  
—134.09  
—129.48  
—128.78  
—127.72  
—126.92  
—126.89  
—126.29  
—125.27  
—69.13  
—57.90  
—56.40  
—39.15  
—21.16

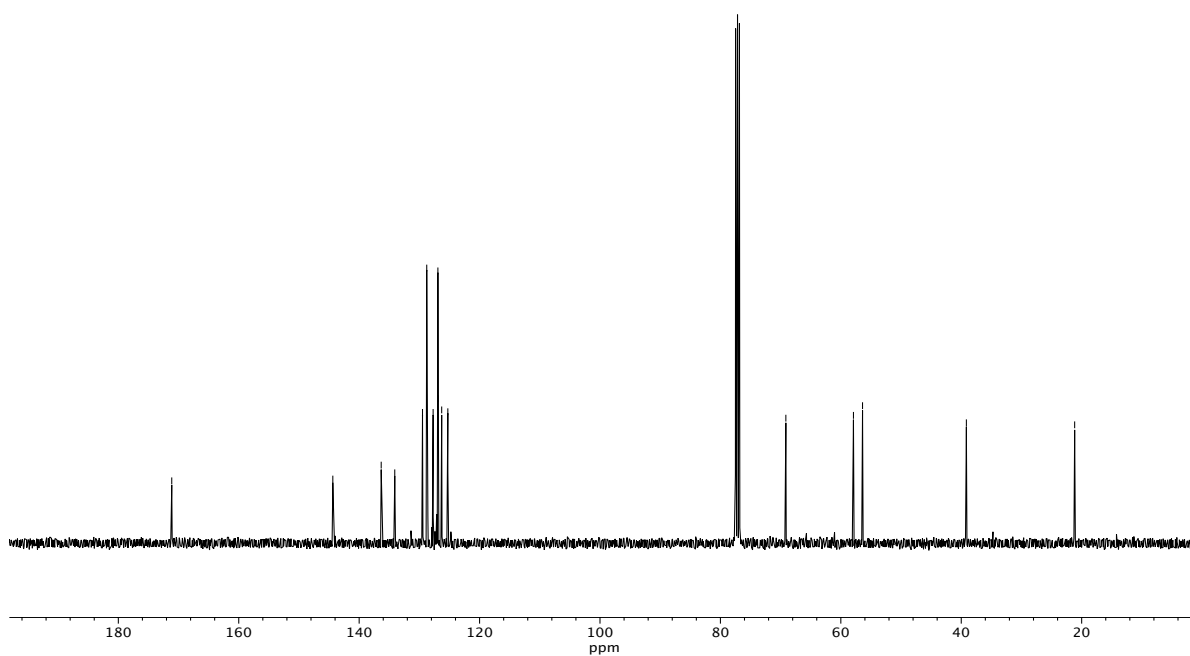

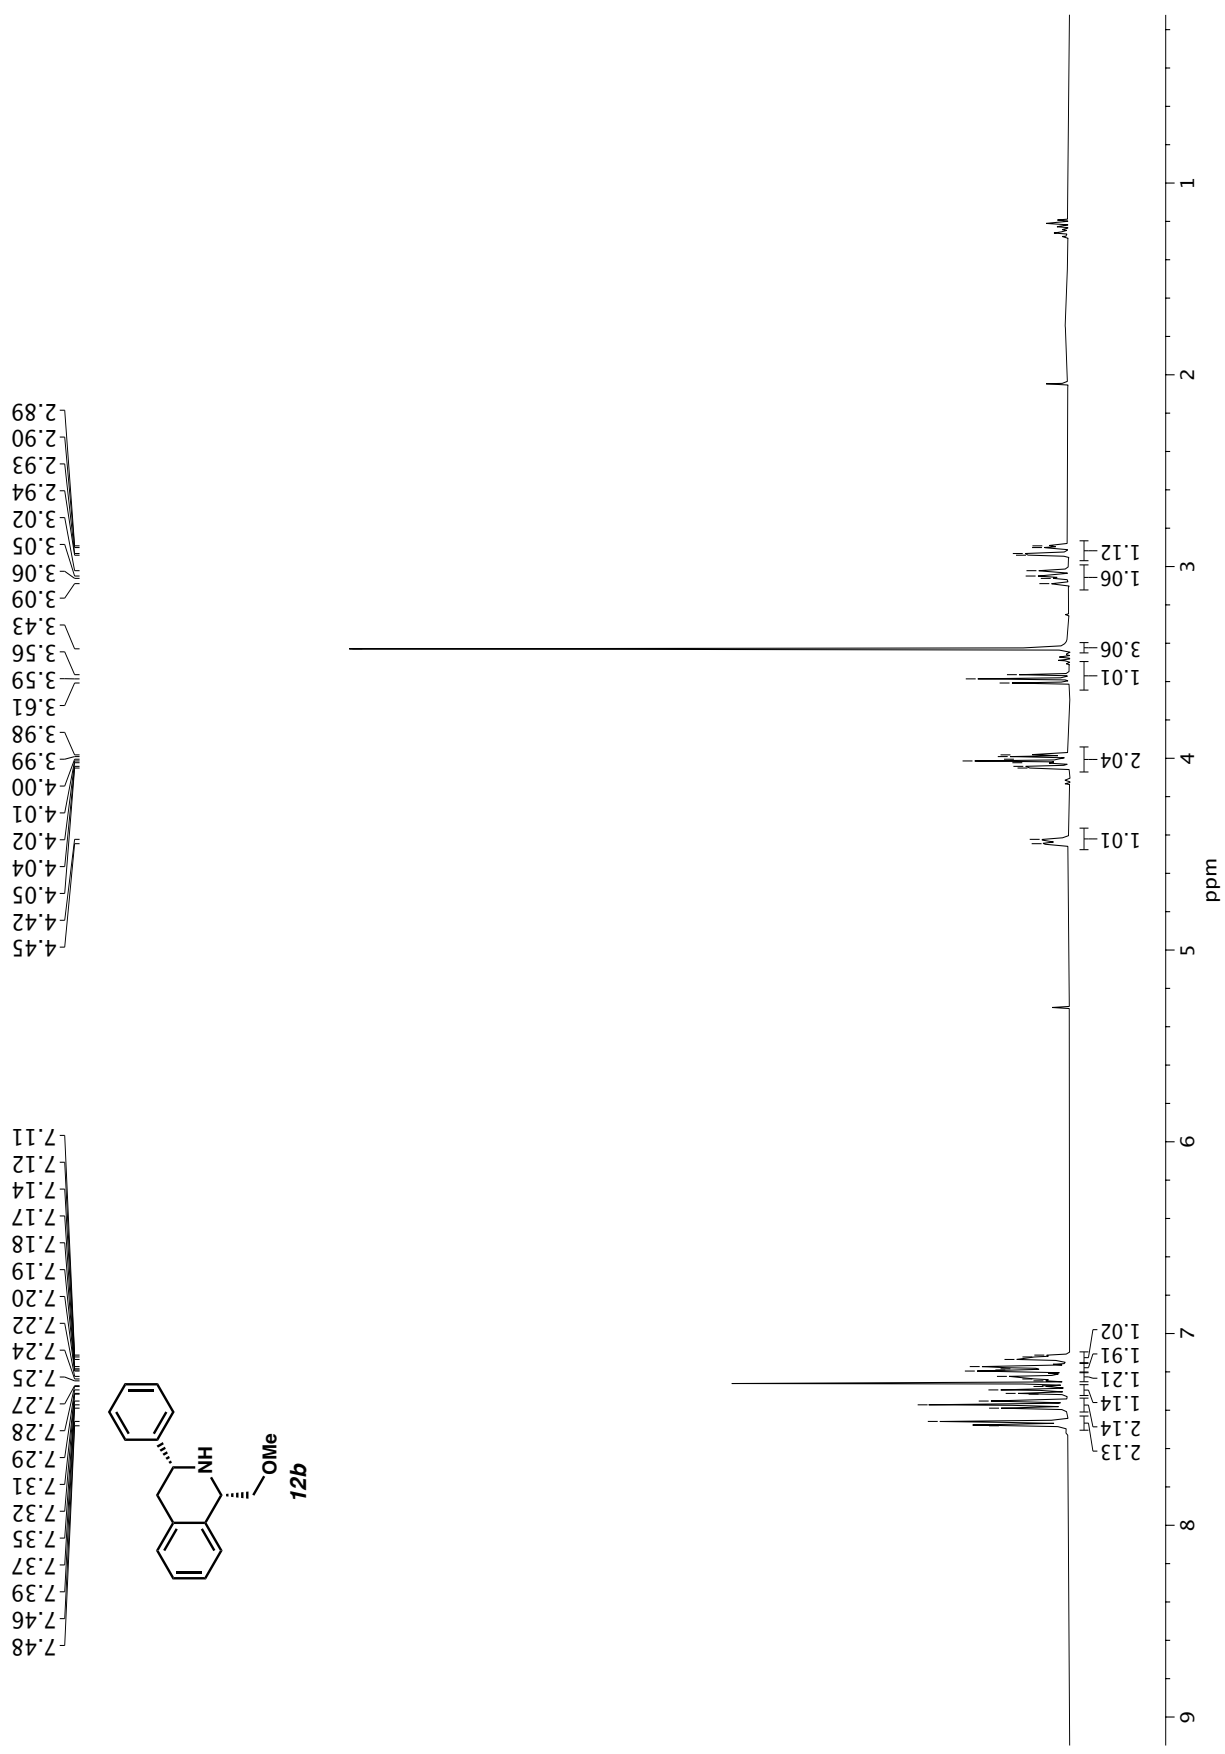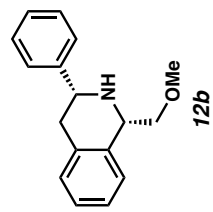

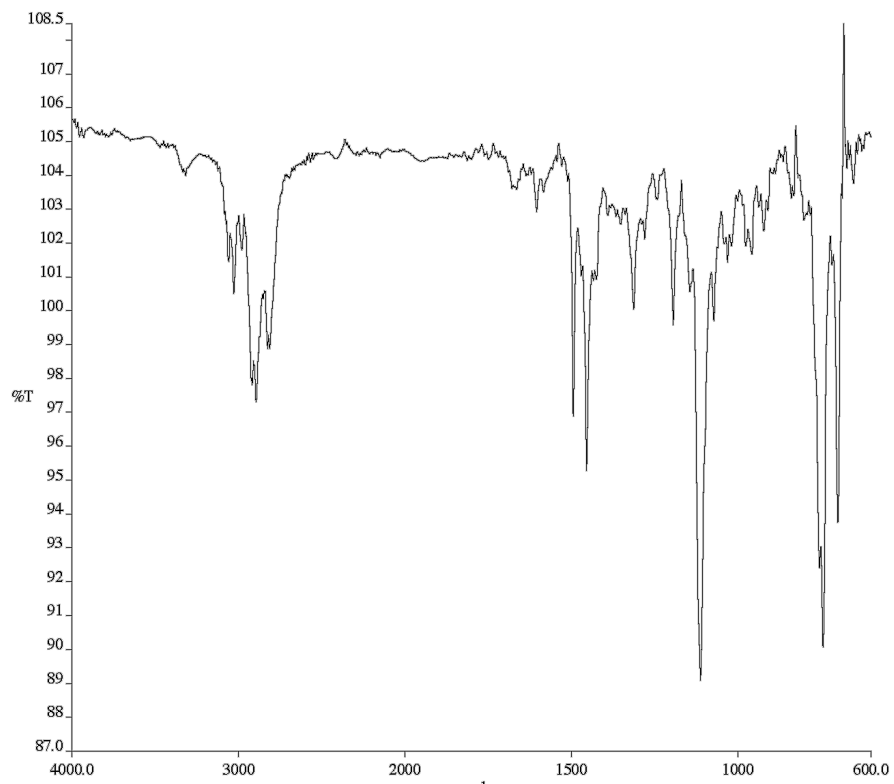

— 144.47  
— 136.30  
— 135.37  
— 129.51  
— 128.70  
— 127.54  
— 126.89  
— 126.56  
— 126.10  
— 124.82  
— 59.31  
— 58.10  
— 57.43  
— 39.01

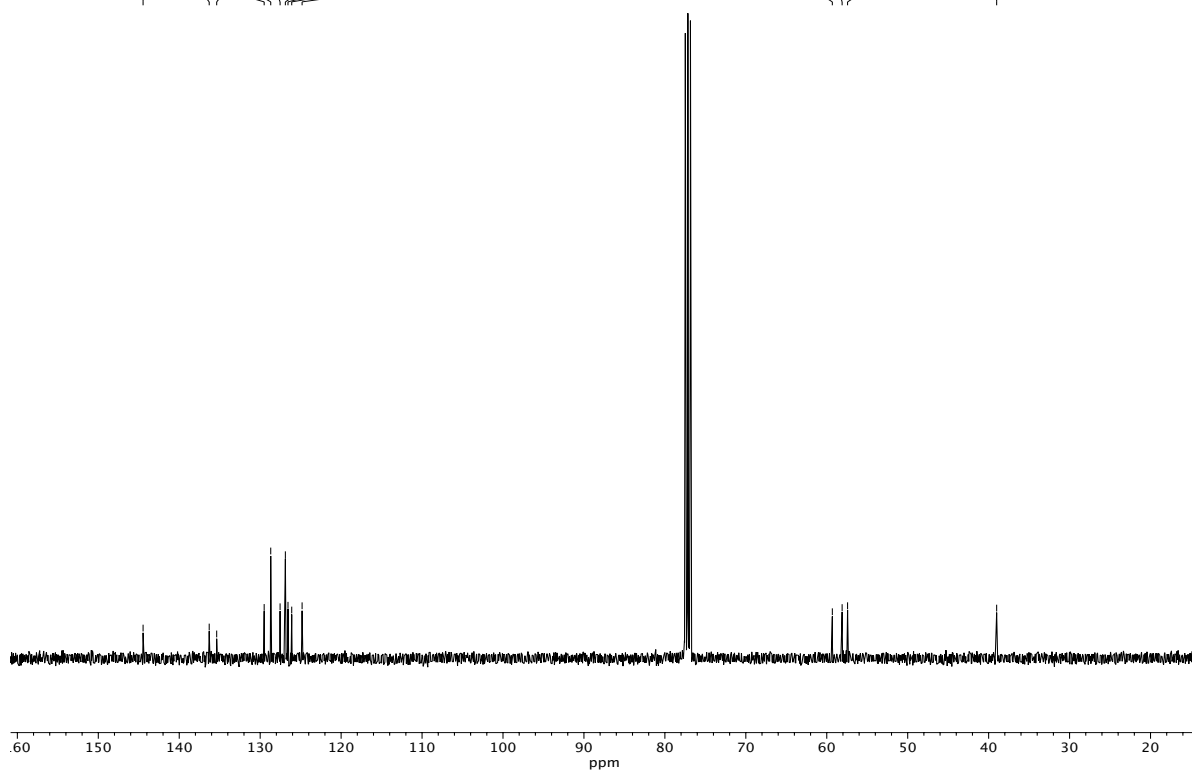

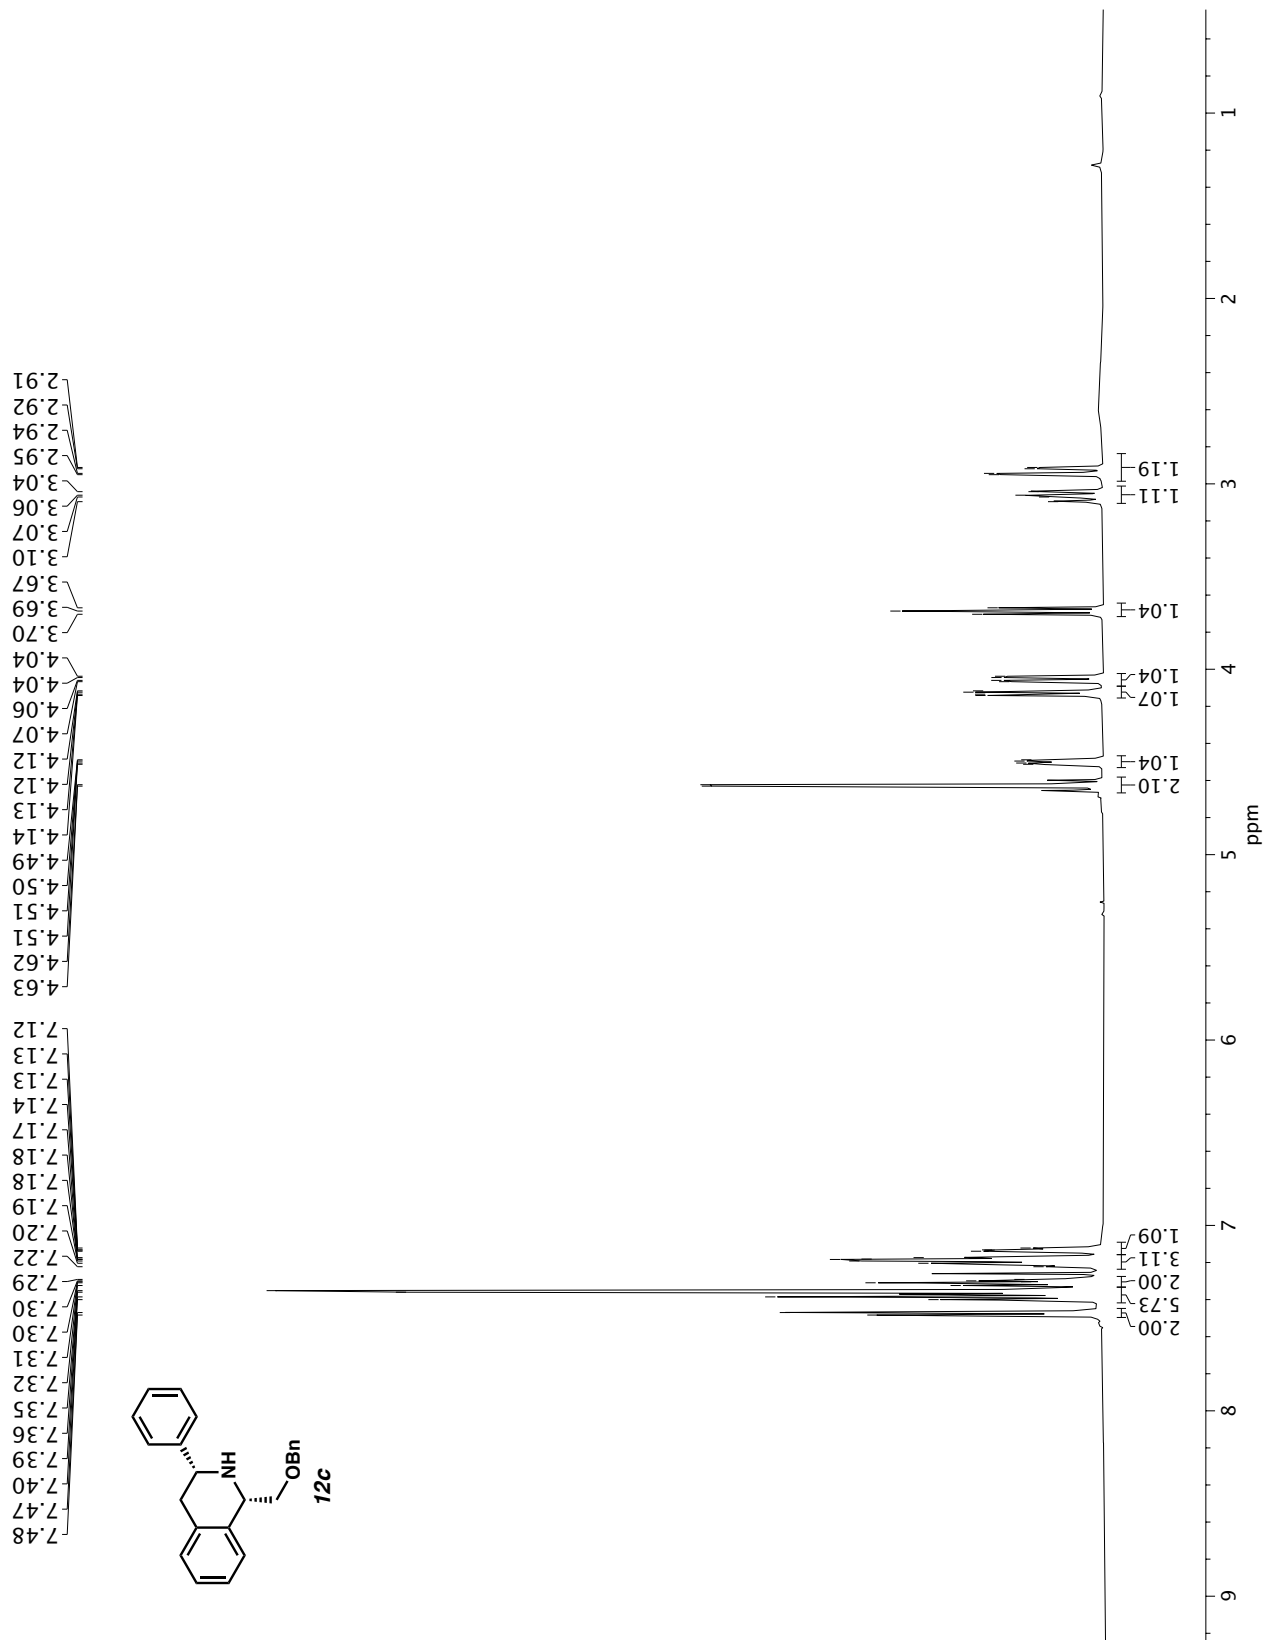

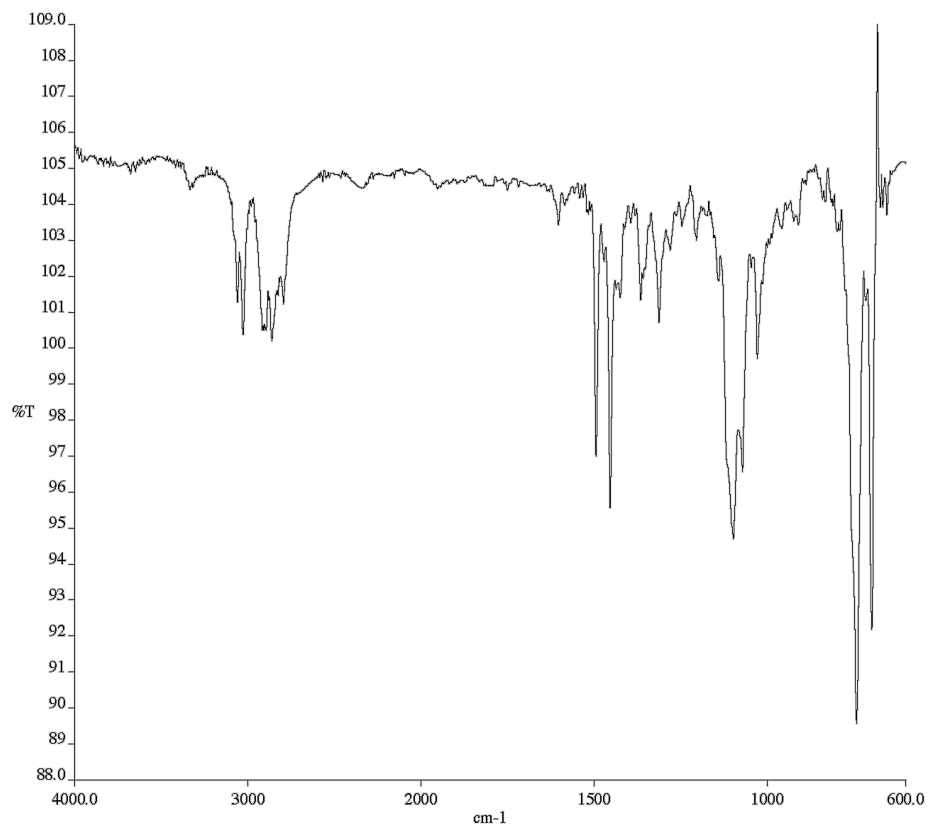

-144.57      -74.81      -58.08      -39.20  
 -138.31      -73.62      -57.51  
 -136.28  
 -135.33  
 -129.45  
 -128.69  
 -128.56  
 -127.92  
 -127.85  
 -127.52  
 -126.87  
 -126.55  
 -126.06  
 -124.93

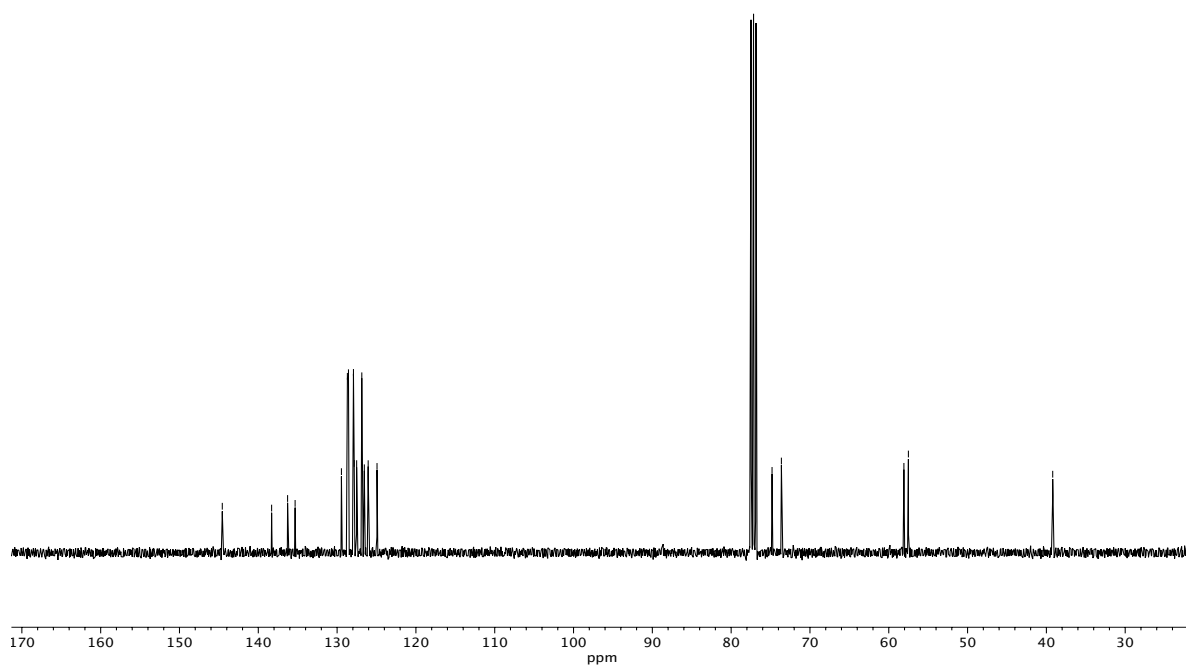

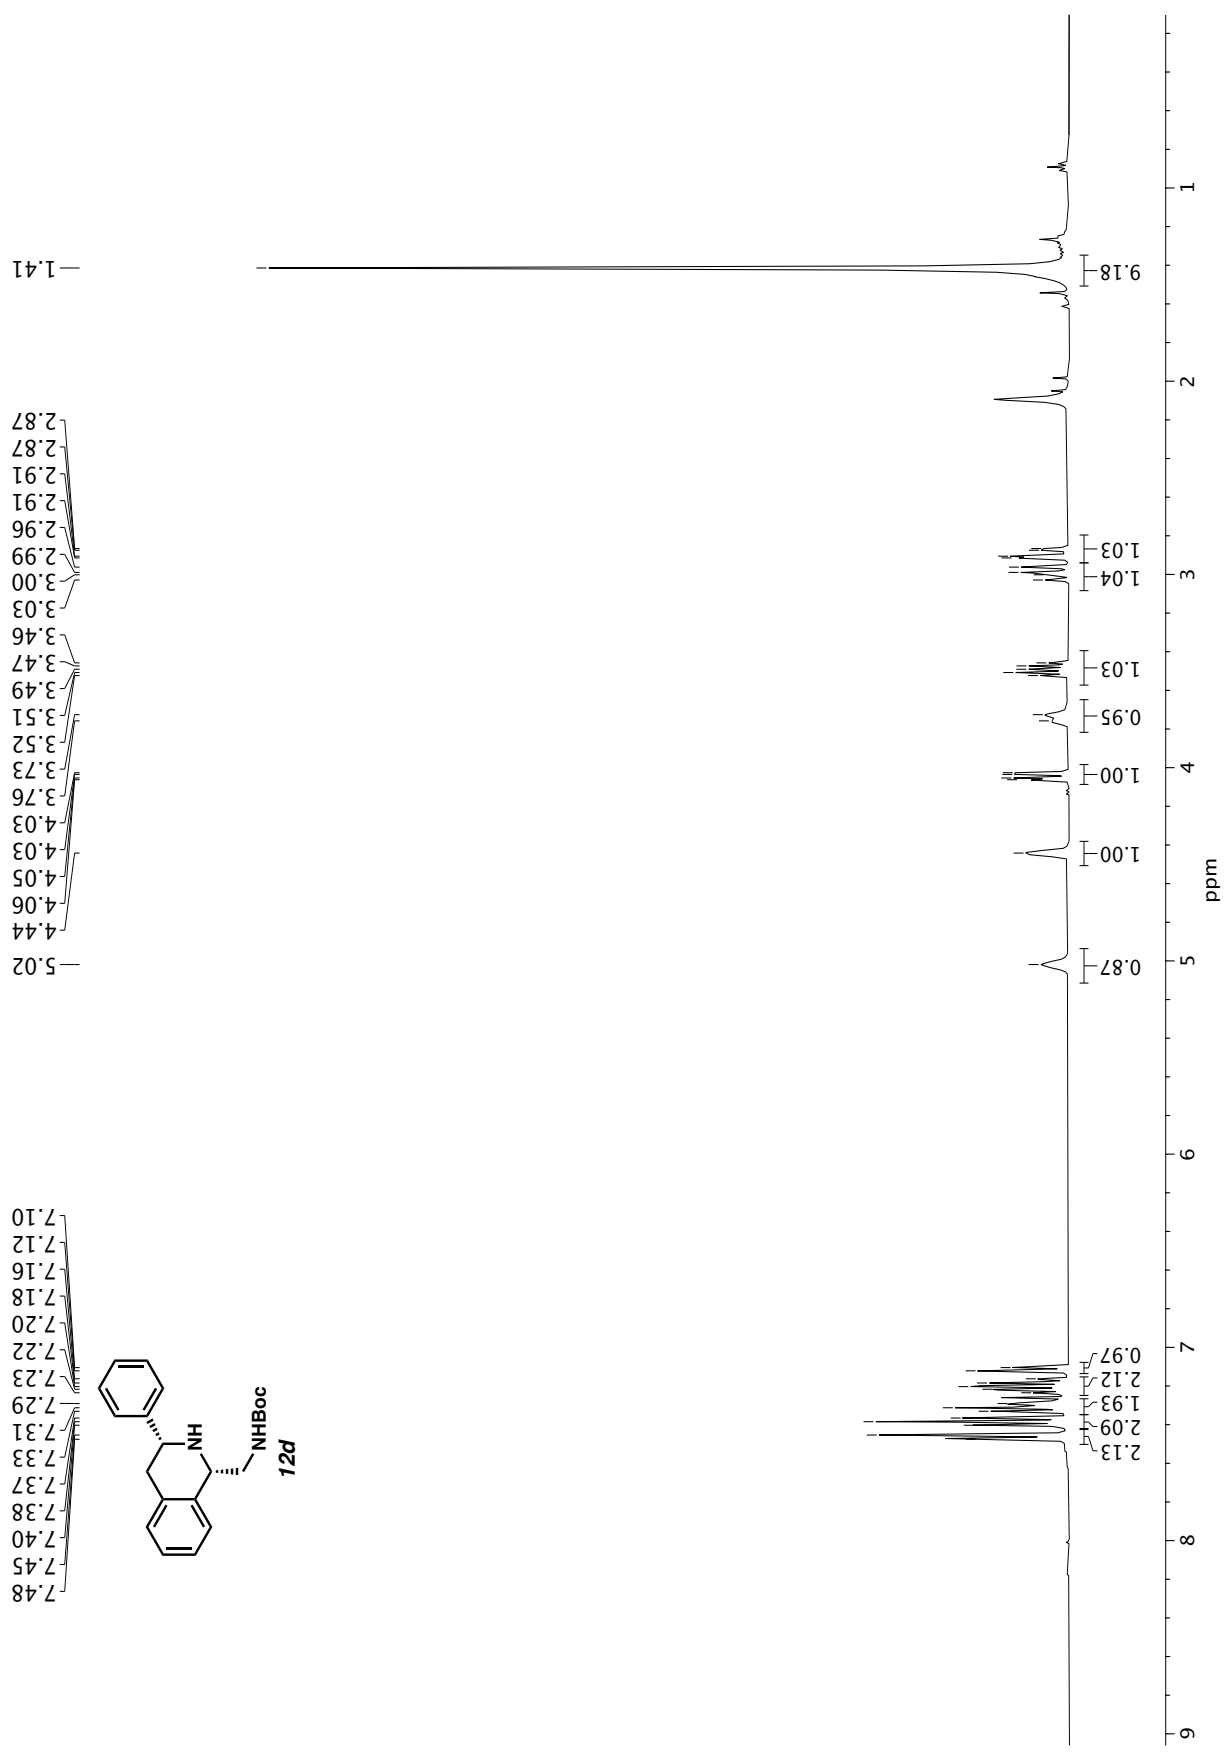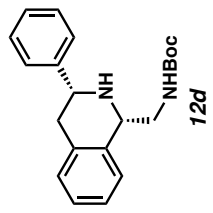

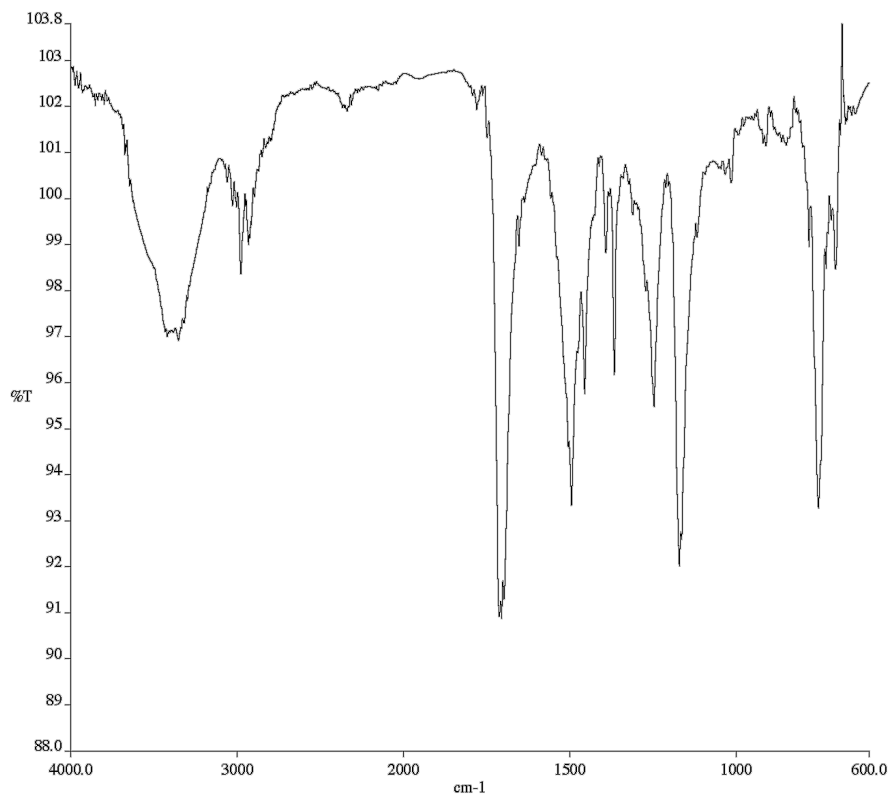

Infrared spectrum (Thin Film, NaCl) of compound **12d**.

—156.42 —144.40 —136.36 —135.23 —129.17 —128.72 —127.66 —126.81 —126.60 —126.39 —125.68 —79.43 —57.97 —57.05 —46.30 —39.14 —28.51

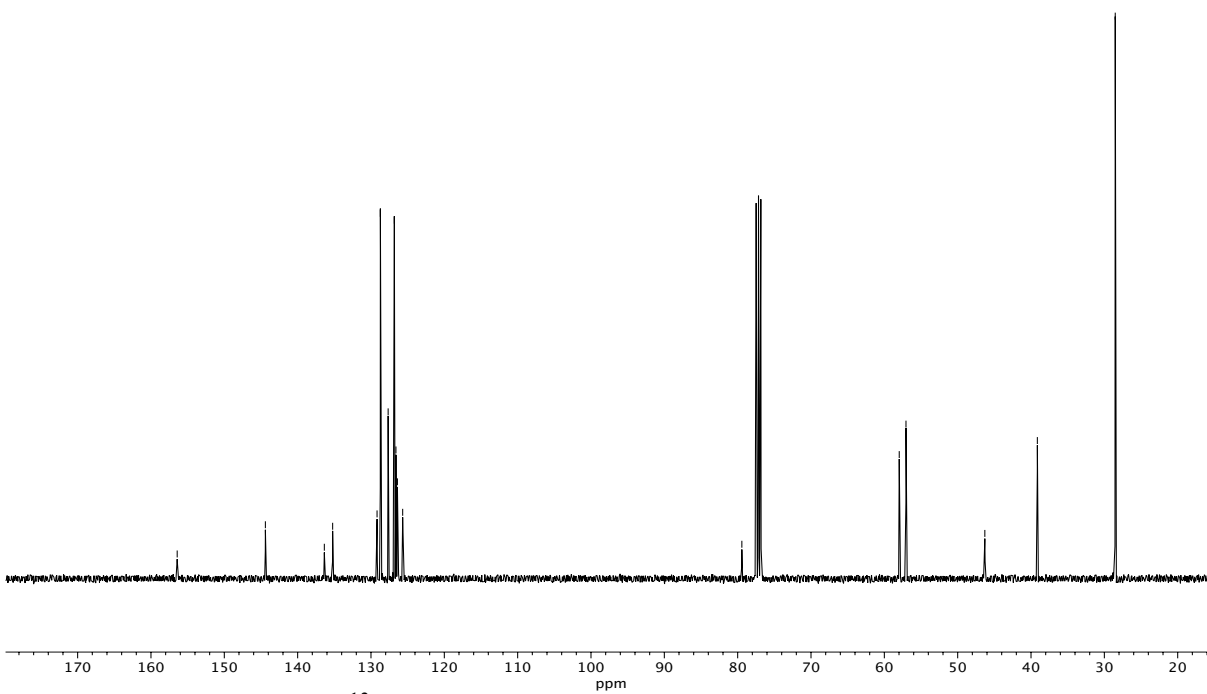

$^{13}\text{C}$  NMR (100 MHz,  $\text{CDCl}_3$ ) of compound **12d**.



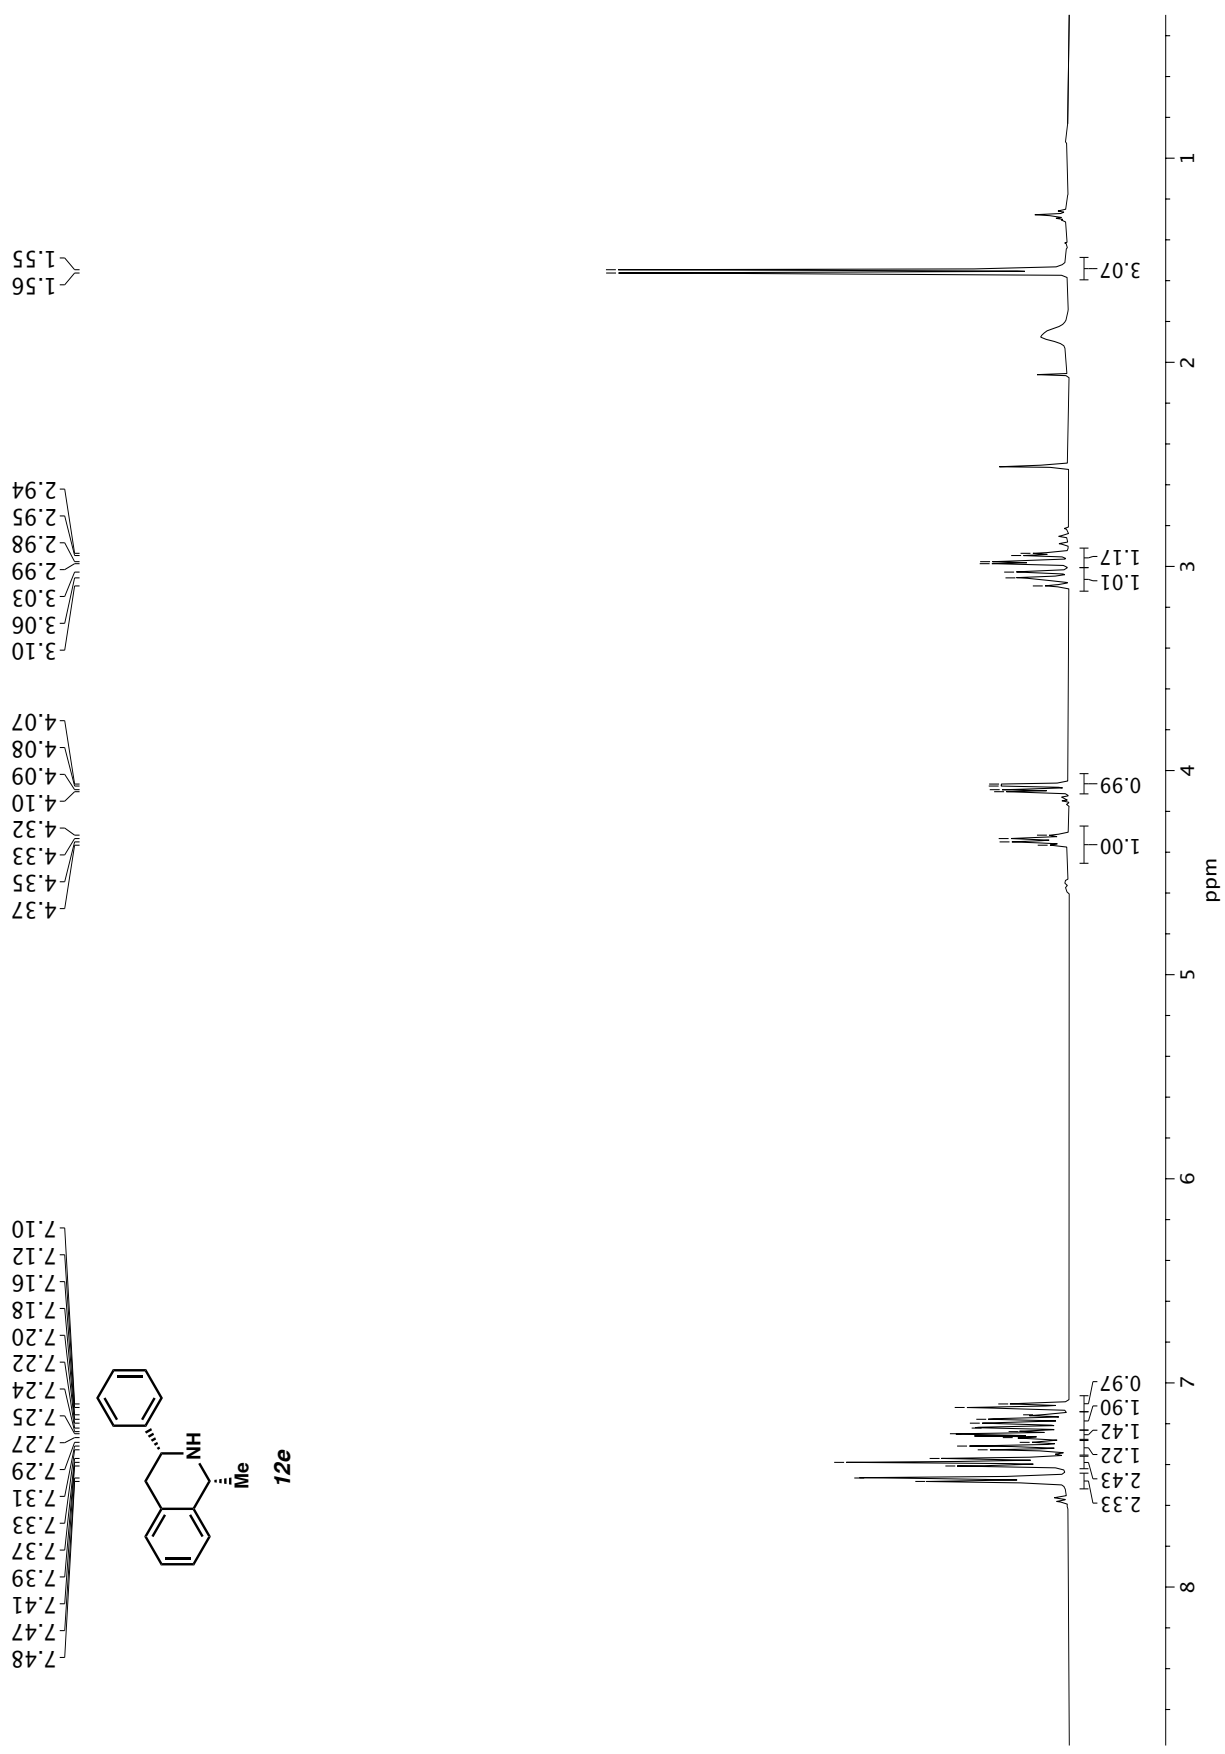

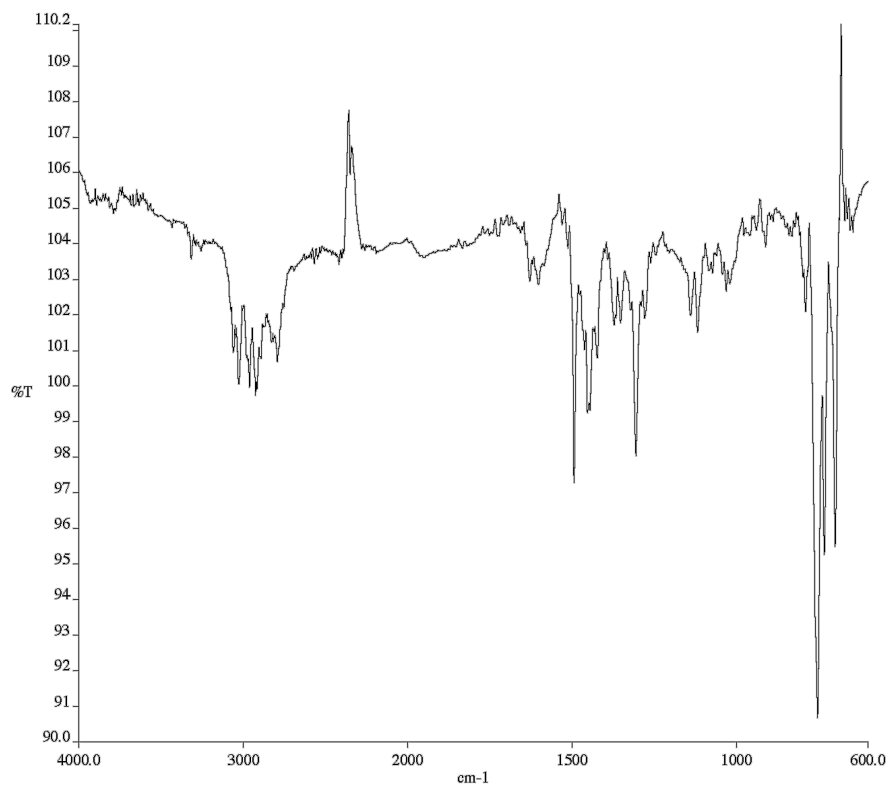

144.53  
 139.88  
 135.23  
 129.11  
 128.73  
 127.51  
 126.71  
 126.21  
 126.19  
 125.36  
 58.81  
 53.57  
 38.92  
 22.44

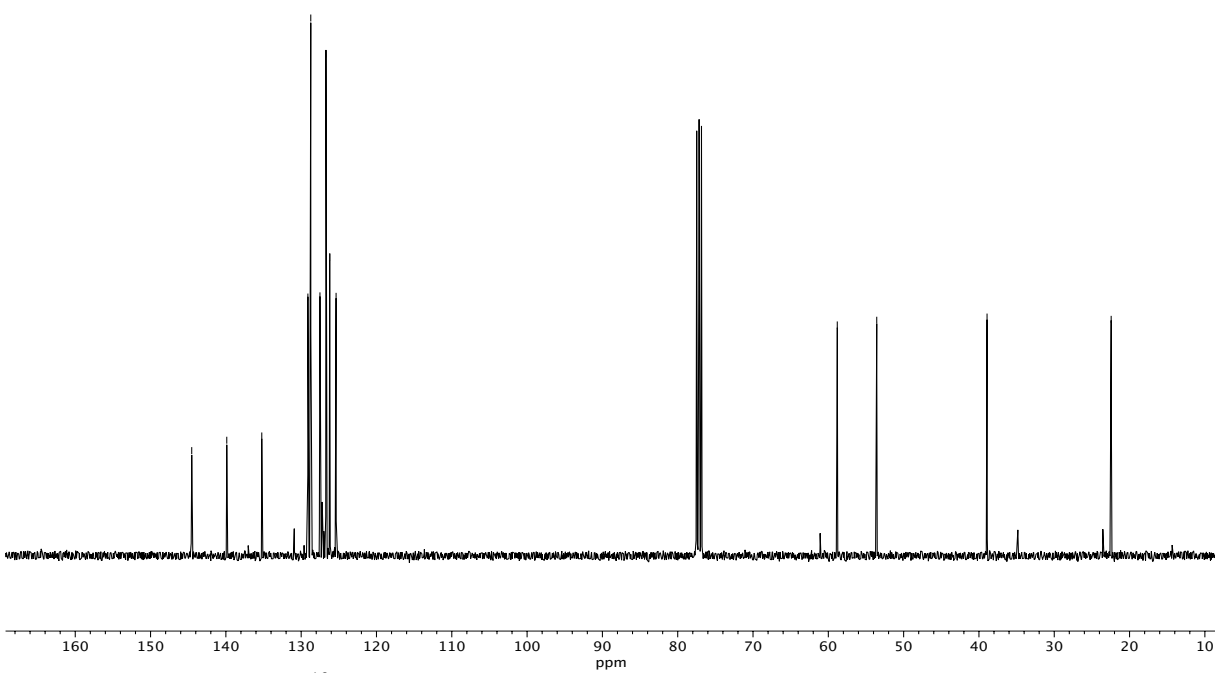

4.52  
4.50  
4.48  
3.98  
3.97  
3.93  
3.92  
3.89  
3.85  
3.83  
3.81  
3.26  
3.22  
3.19  
3.14  
3.13  
3.10  
3.08

7.25  
7.21  
7.21  
7.19  
7.18  
7.15  
7.05  
6.99  
6.96  
6.94  
6.94  
6.85  
6.82

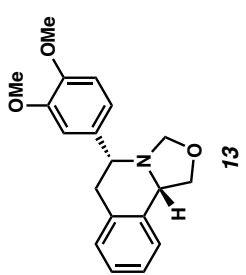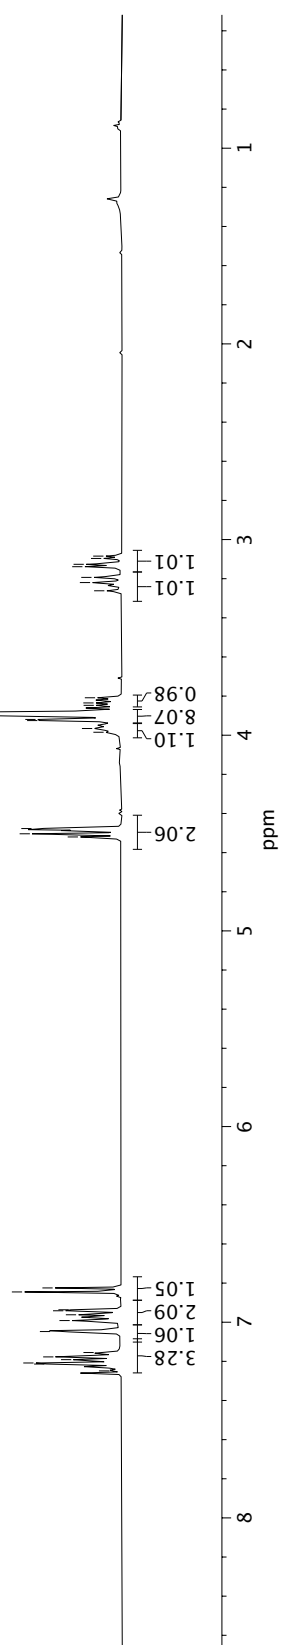

<sup>1</sup>H NMR (400 MHz, CDCl<sub>3</sub>) of compound **13**.

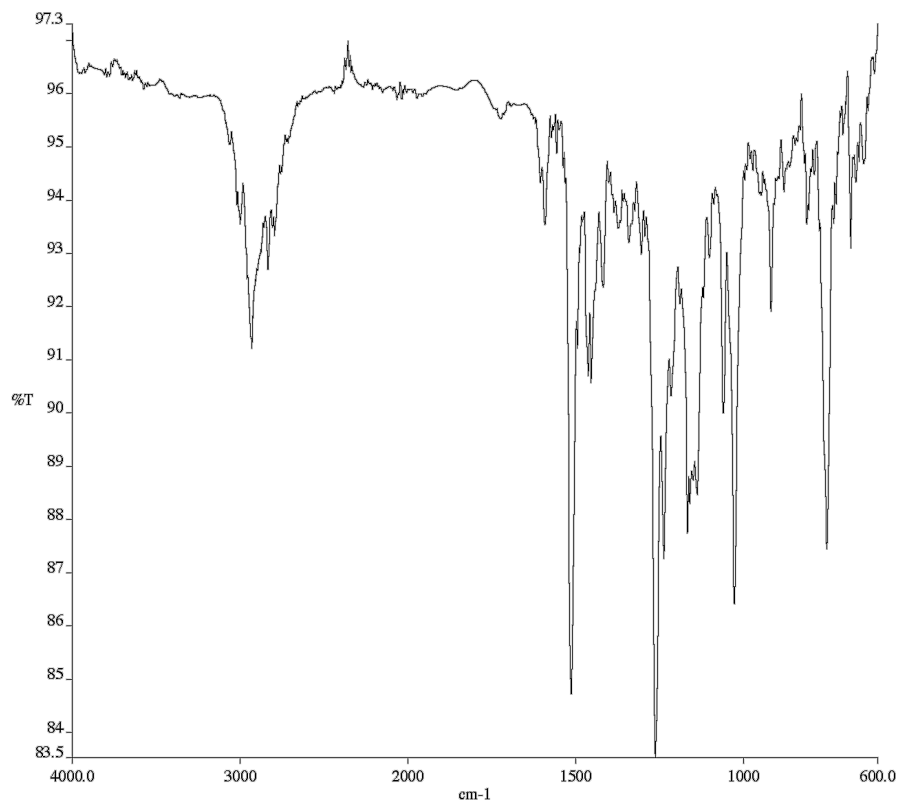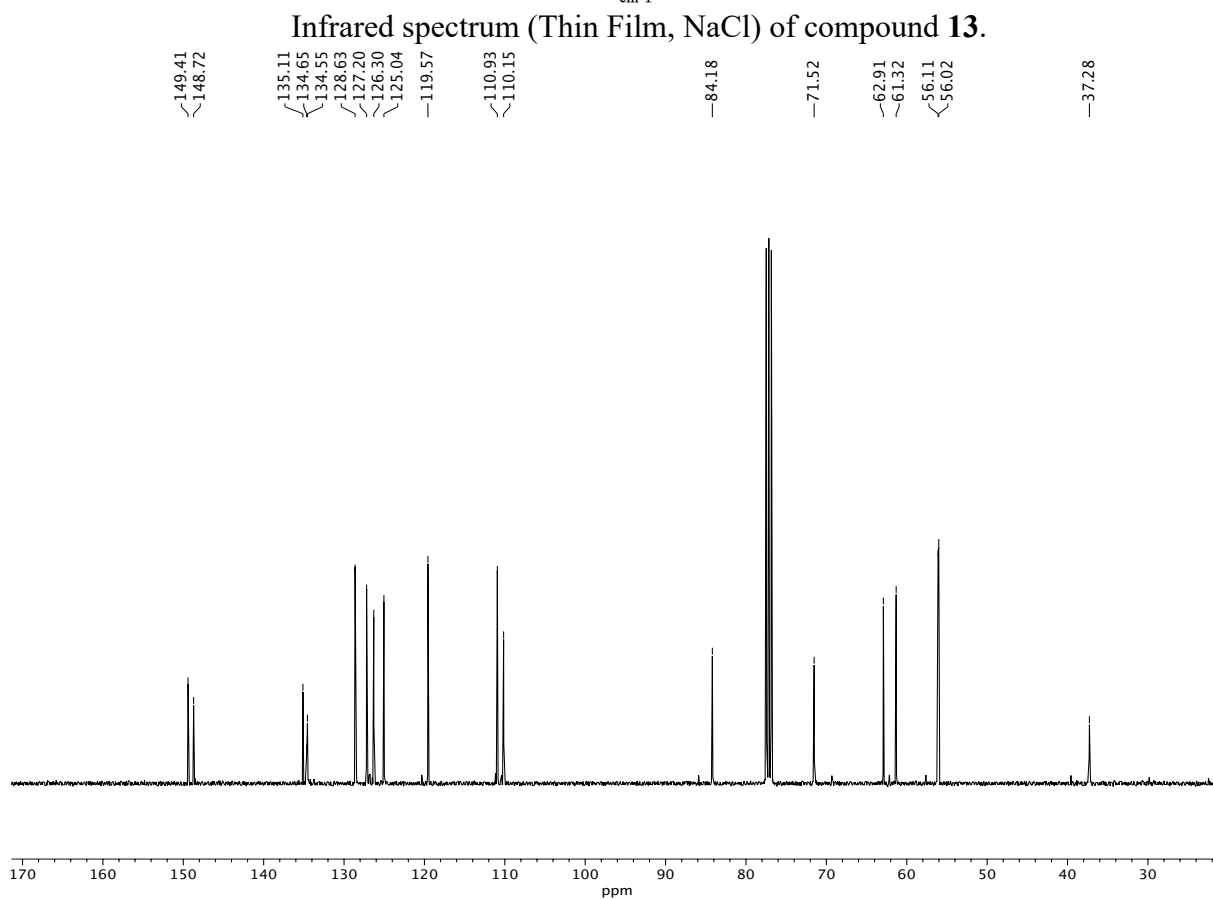

<sup>1</sup>H NMR (400 MHz, CDCl<sub>3</sub>) of compound **14**.

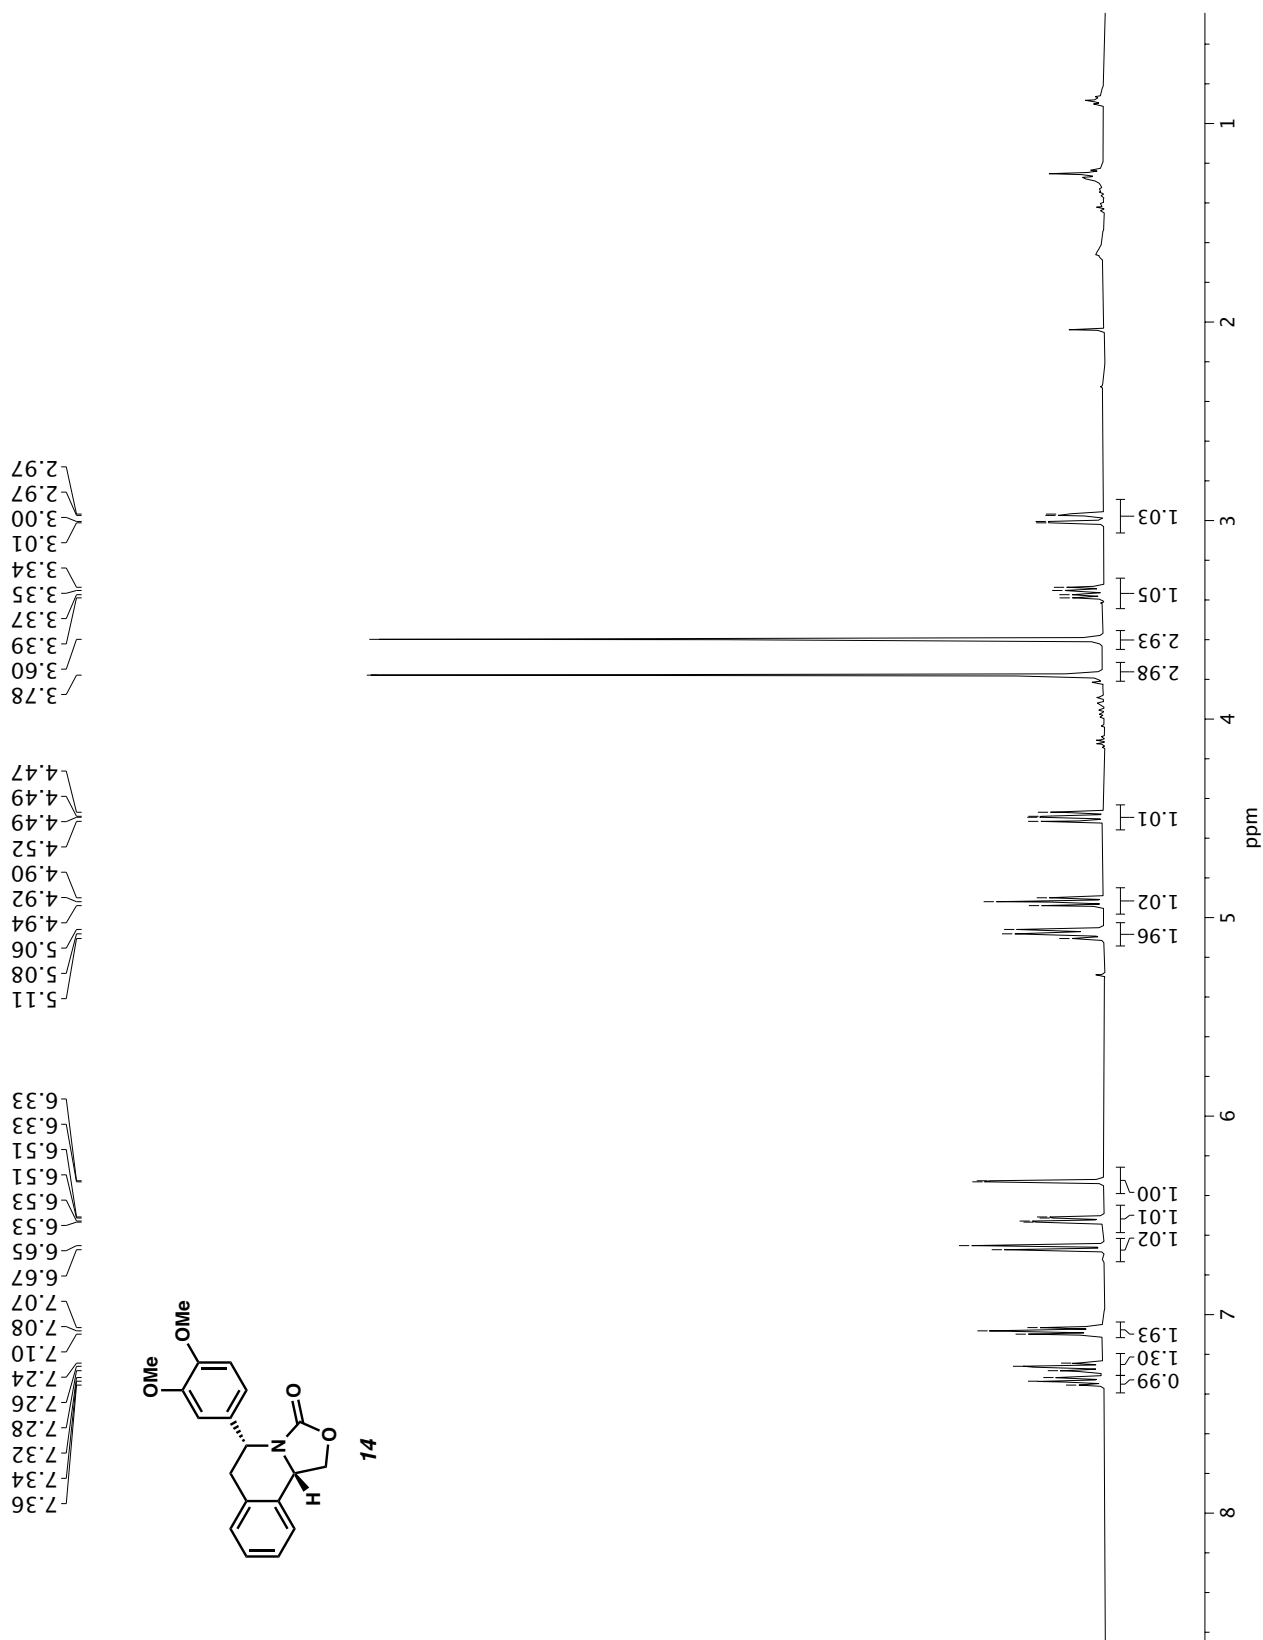

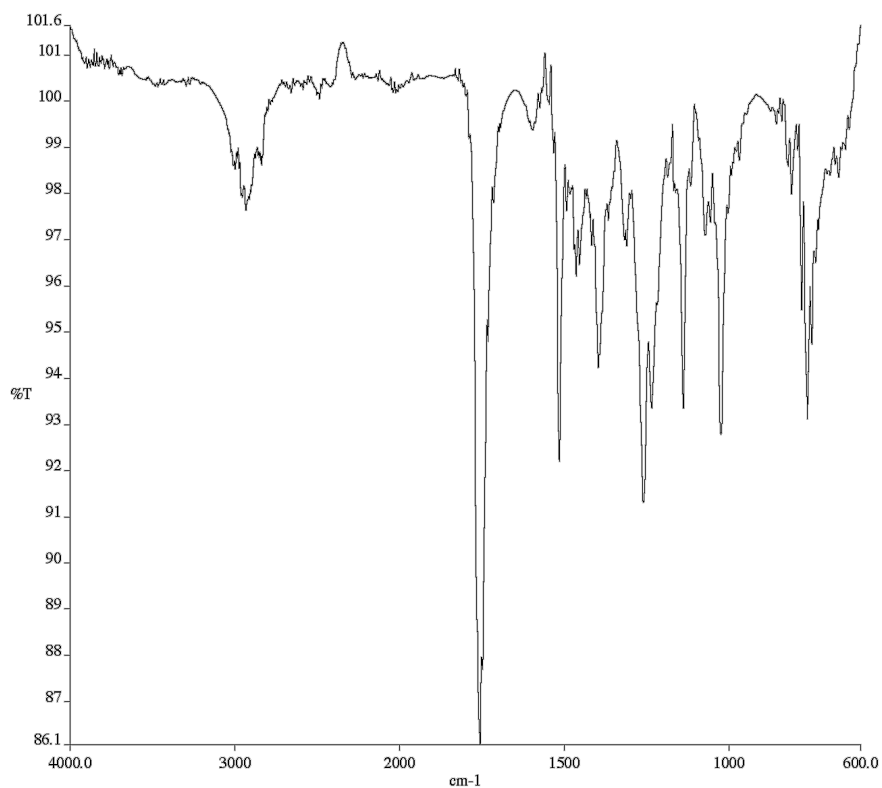

-156.11  
 148.69  
 148.33  
 135.97  
 134.22  
 133.90  
 129.41  
 128.45  
 127.45  
 122.39  
 118.47  
 110.87  
 109.34  
 -67.45  
 55.88  
 55.55  
 54.63  
 53.44  
 -36.81

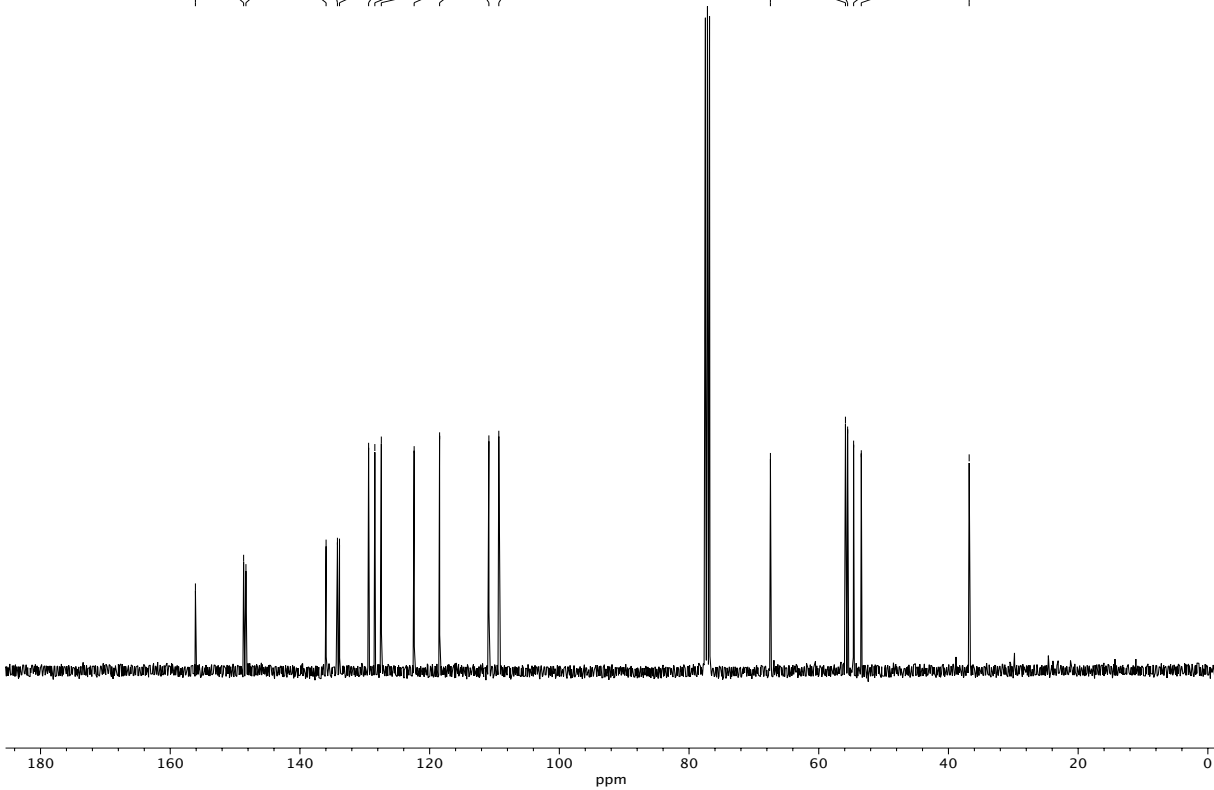

<sup>1</sup>H NMR (400 MHz, CDCl<sub>3</sub>) of compound **15**.

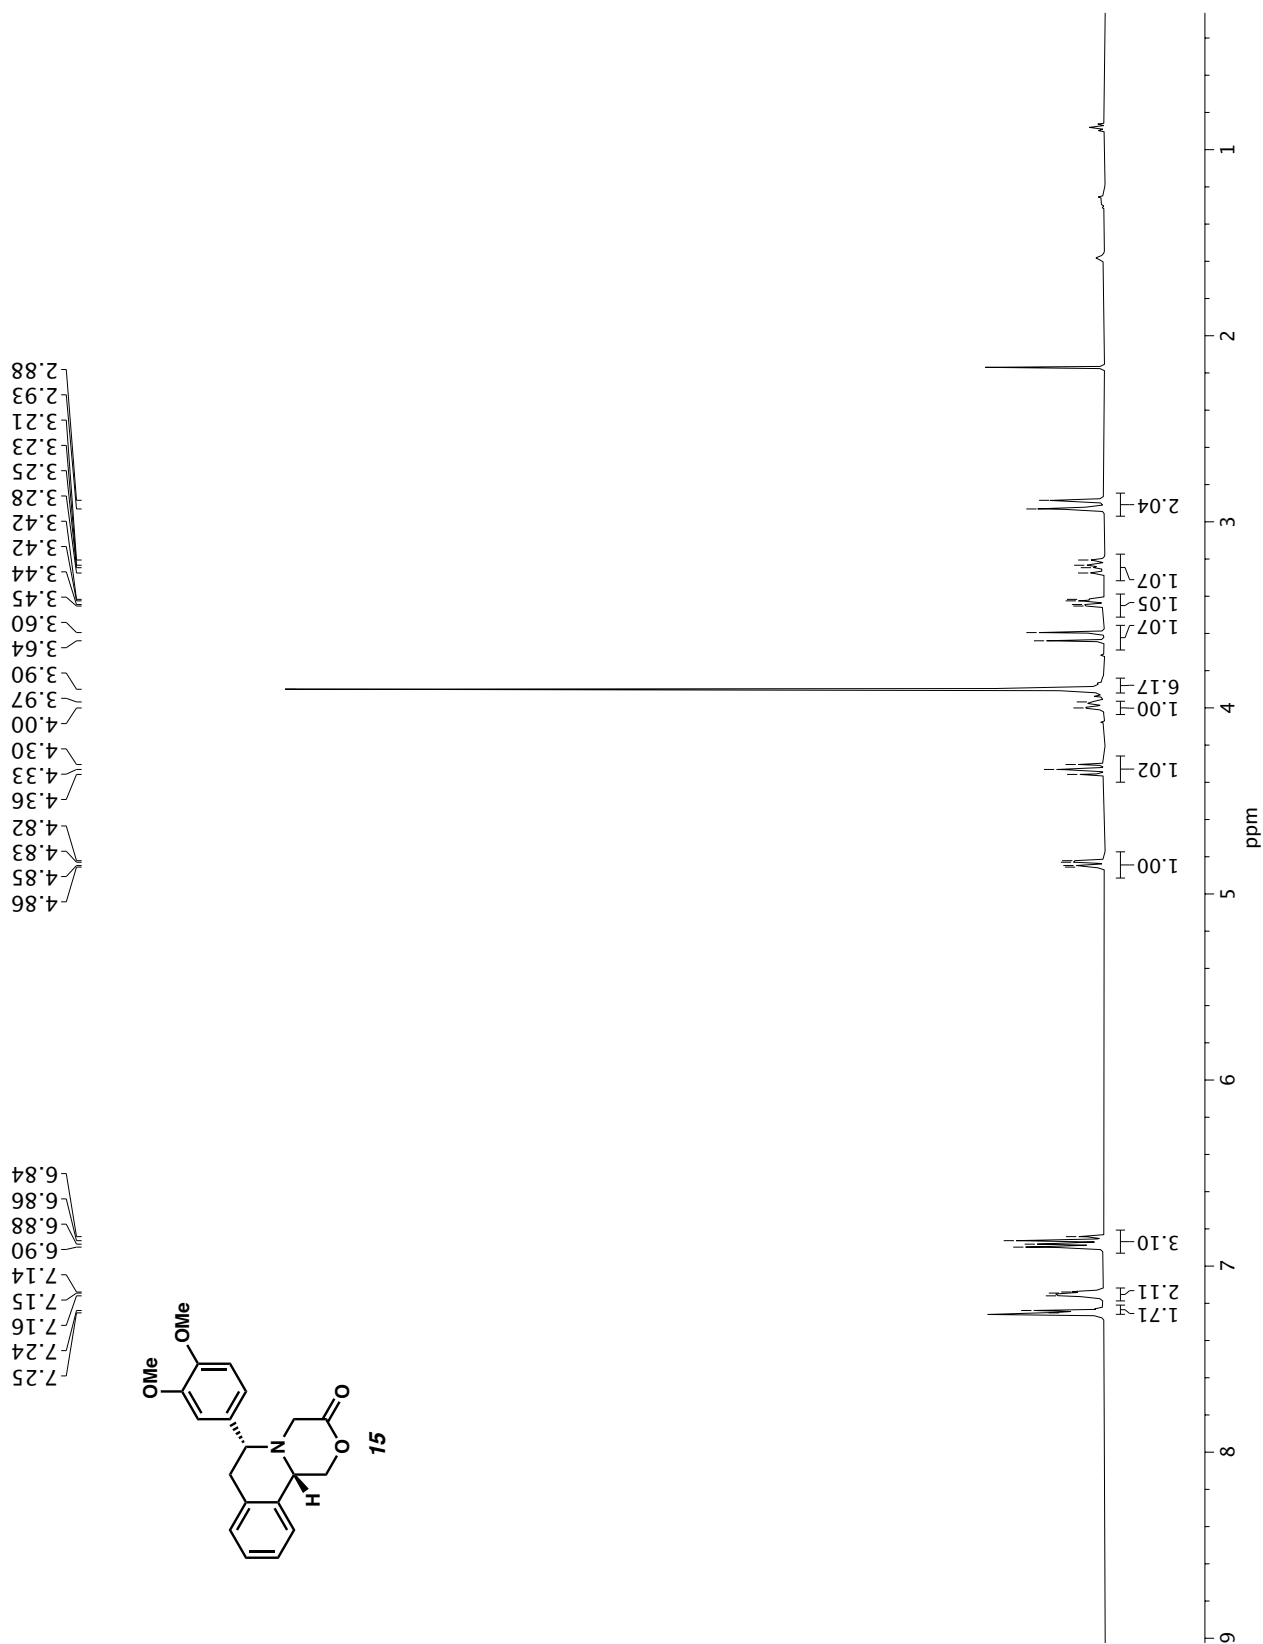

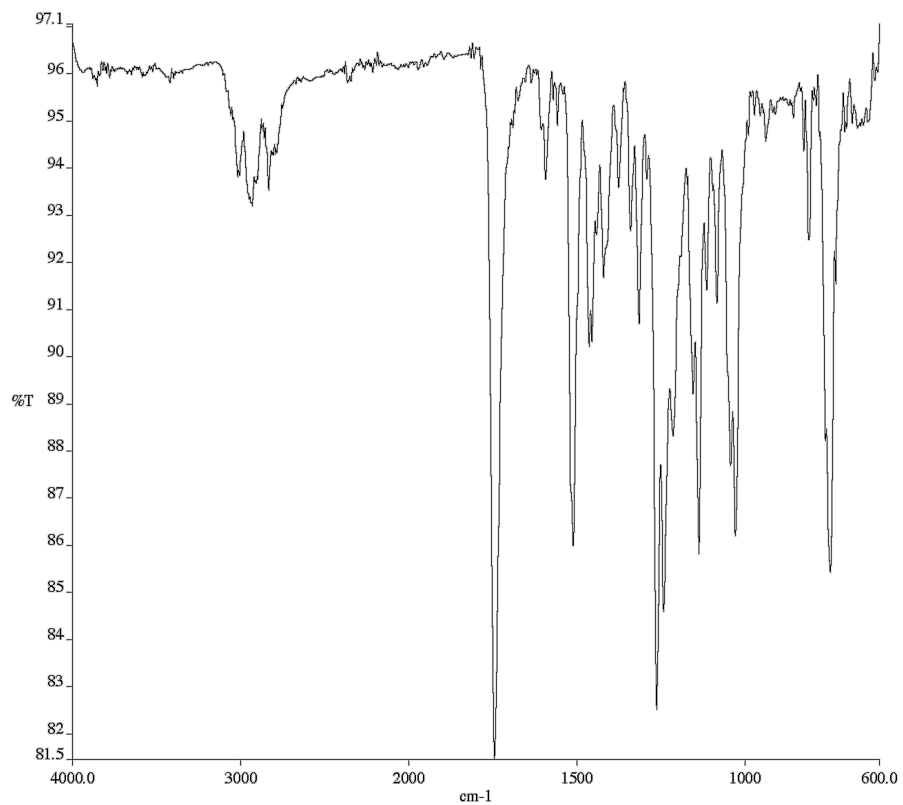

Infrared spectrum (Thin Film, NaCl) of compound **15**.

—1677.71      /1497.75      /149.14      /135.03      /132.79      /130.61      /129.14      /127.65      /126.72      /124.65      /120.49      /111.42      /110.18      —73.27      /63.84      /59.52      /56.14      /56.13      /54.94      —38.86

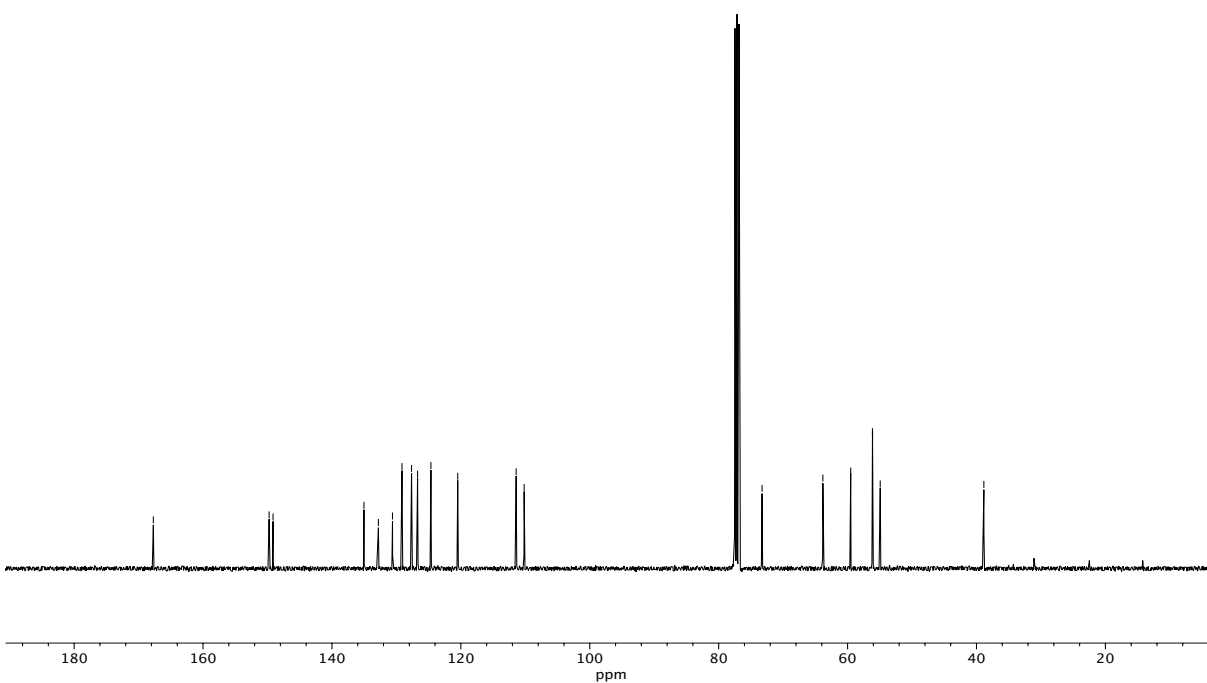

$^{13}\text{C}$  NMR (100 MHz,  $\text{CDCl}_3$ ) of compound **15**.



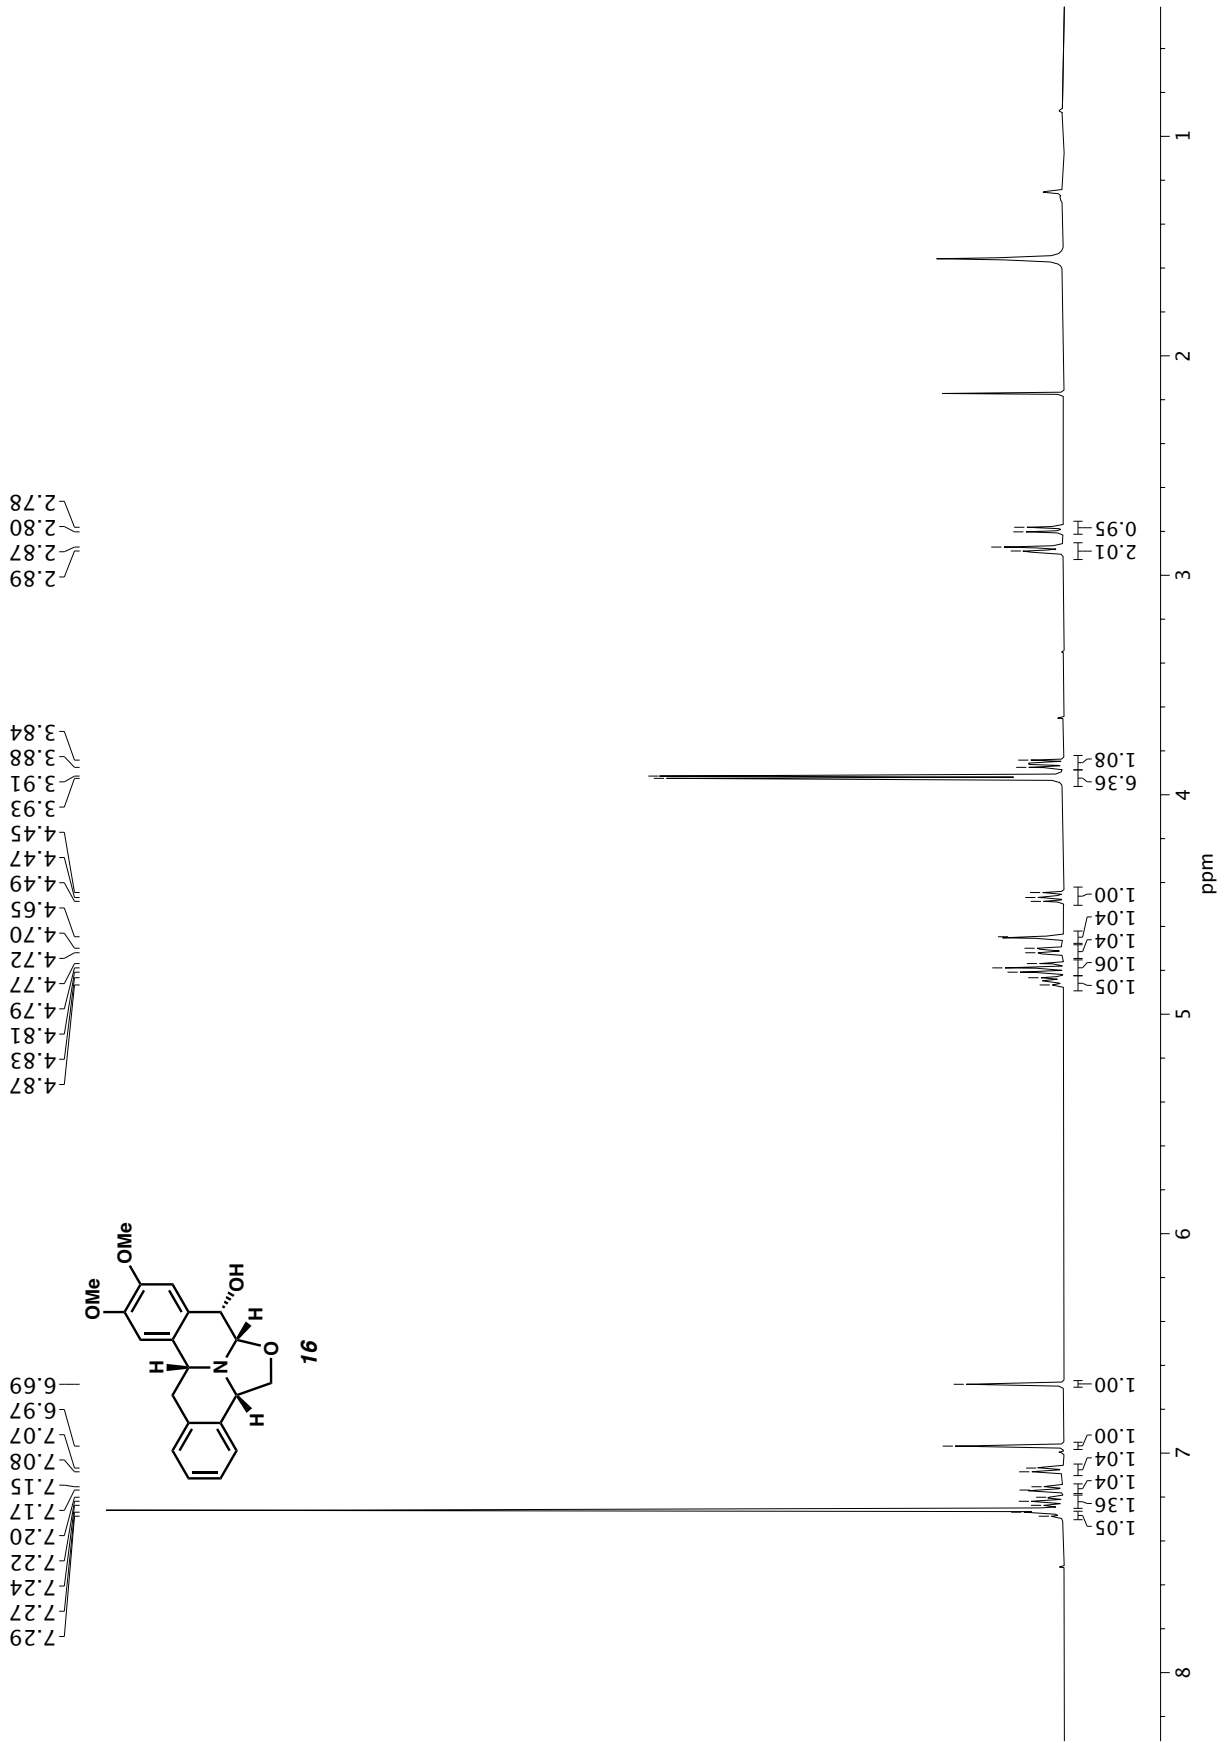

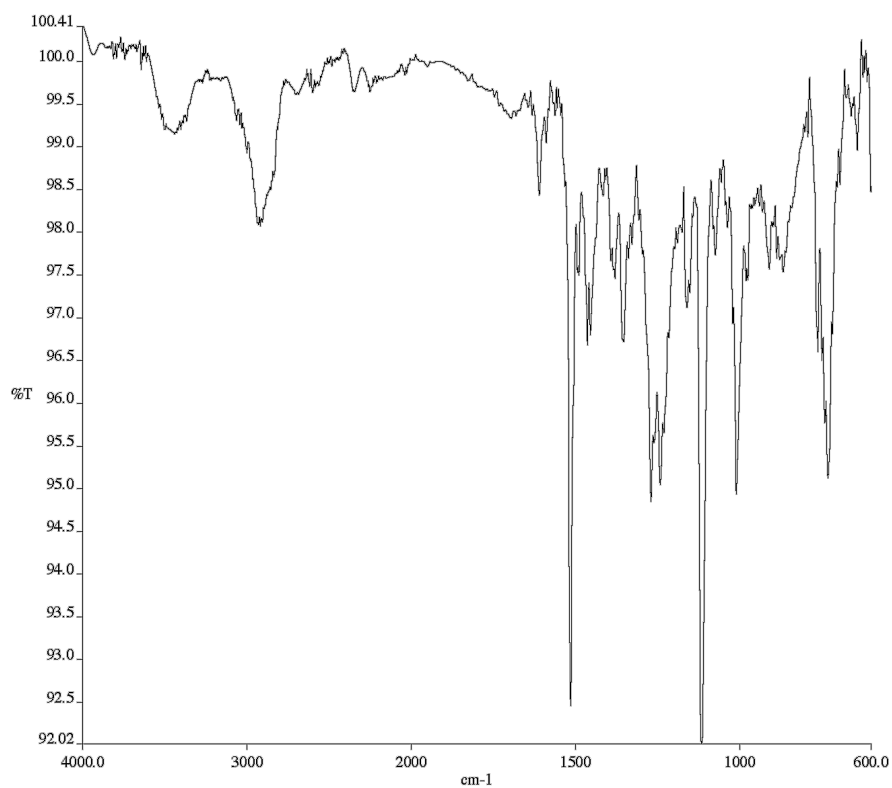

149.37  
148.56  
136.48  
133.07  
130.93  
129.30  
127.31  
127.30  
126.78  
126.62  
113.55  
109.16  
86.67  
74.44  
67.88  
57.28  
56.20  
56.10  
54.23  
31.08

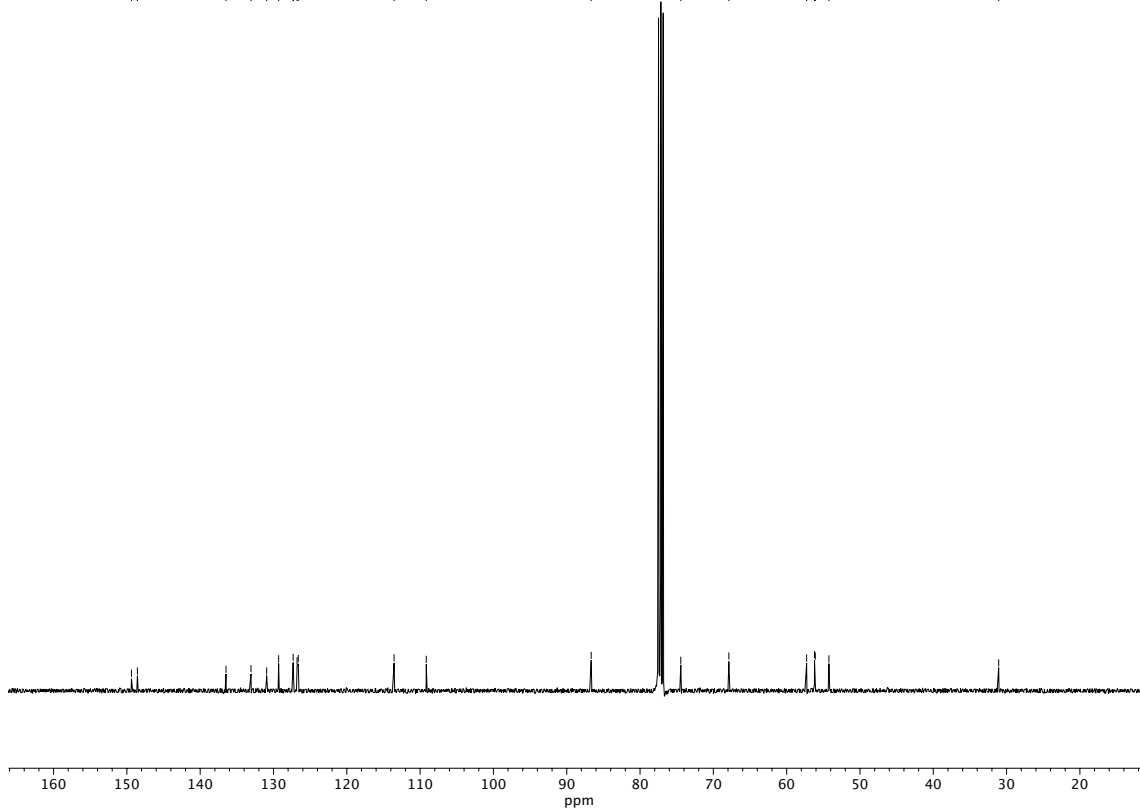

## SFC Traces of Racemic and Enantioenriched Compounds

### Racemic **8a**•Cbz

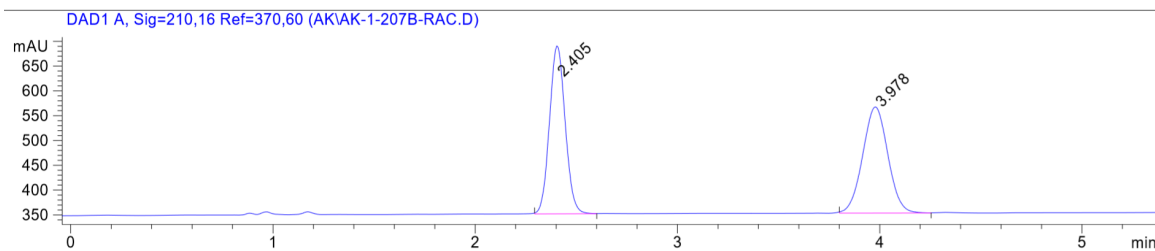

Signal 1: DAD1 A, Sig=210,16 Ref=370,60

| Peak # | RetTime [min] | Type | Width [min] | Area [mAU*s] | Height [mAU] | Area %  |
|--------|---------------|------|-------------|--------------|--------------|---------|
| 1      | 2.405         | BB   | 0.0872      | 1827.17725   | 337.16122    | 49.6720 |
| 2      | 3.978         | BB   | 0.1331      | 1851.30725   | 213.68279    | 50.3280 |

### Enantioenriched **8a**•Cbz

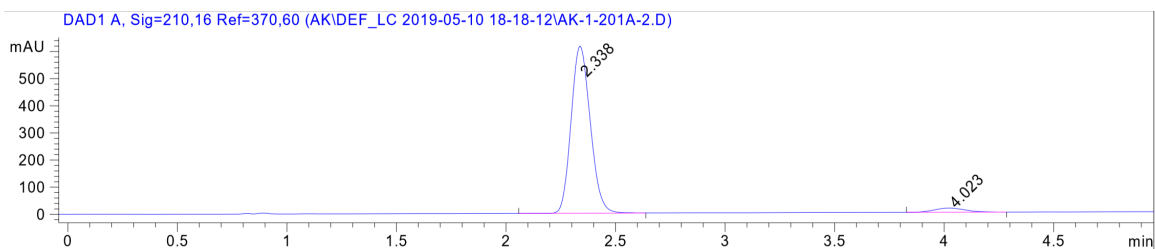

Signal 1: DAD1 A, Sig=210,16 Ref=370,60

| Peak # | RetTime [min] | Type | Width [min] | Area [mAU*s] | Height [mAU] | Area %  |
|--------|---------------|------|-------------|--------------|--------------|---------|
| 1      | 2.338         | BB   | 0.0970      | 3750.96460   | 616.63293    | 96.1873 |
| 2      | 4.023         | BB   | 0.1508      | 148.68077    | 15.37459     | 3.8127  |

### Racemic **8b**•Cbz

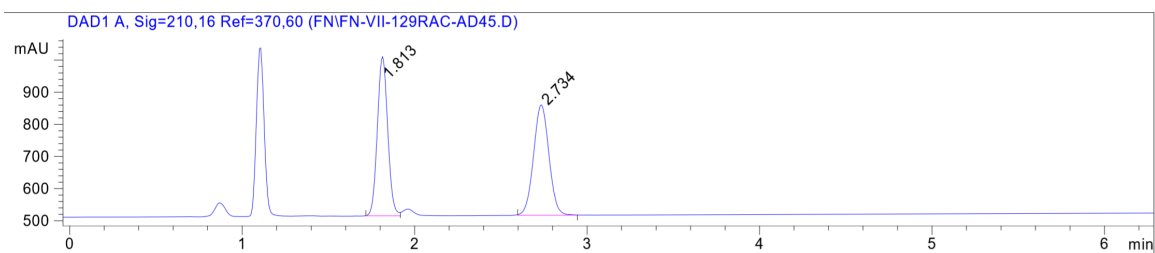

Signal 1: DAD1 A, Sig=210,16 Ref=370,60

| Peak # | RetTime [min] | Type | Width [min] | Area [mAU*s] | Height [mAU] | Area %  |
|--------|---------------|------|-------------|--------------|--------------|---------|
| 1      | 1.813         | BV   | 0.0691      | 2070.81763   | 492.04037    | 49.2789 |
| 2      | 2.734         | BB   | 0.0966      | 2131.41943   | 342.59348    | 50.7211 |

## Enantioenriched **8b**•Cbz

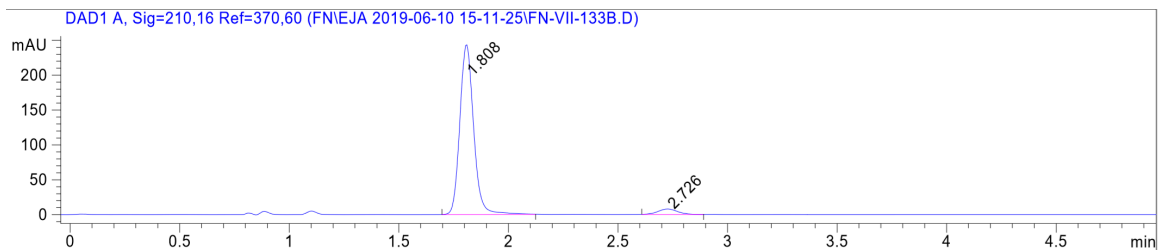

Signal 1: DAD1 A, Sig=210,16 Ref=370,60

| Peak # | RetTime [min] | Type | Width [min] | Area [mAU*s] | Height [mAU] | Area %  |
|--------|---------------|------|-------------|--------------|--------------|---------|
| 1      | 1.808         | BB   | 0.0670      | 1068.41528   | 244.38884    | 95.6879 |
| 2      | 2.726         | BB   | 0.0959      | 48.14769     | 7.81482      | 4.3121  |

## Racemic **8c**•Cbz

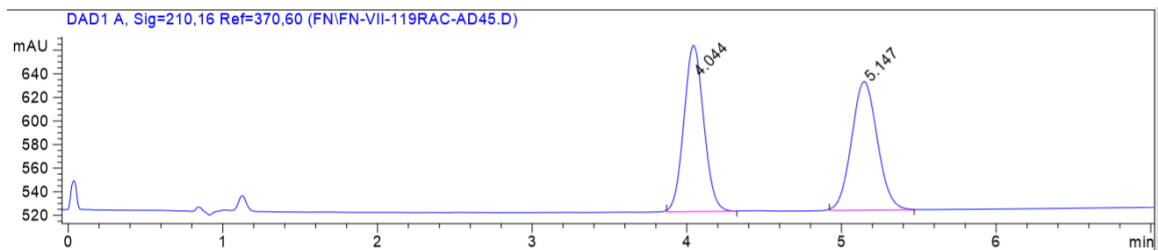

Signal 1: DAD1 A, Sig=210,16 Ref=370,60

| Peak # | RetTime [min] | Type | Width [min] | Area [mAU*s] | Height [mAU] | Area %  |
|--------|---------------|------|-------------|--------------|--------------|---------|
| 1      | 4.044         | BB   | 0.1403      | 1258.43604   | 140.79761    | 49.8928 |
| 2      | 5.147         | BB   | 0.1793      | 1263.84558   | 109.00304    | 50.1072 |

## Enantioenriched **8c**•Cbz

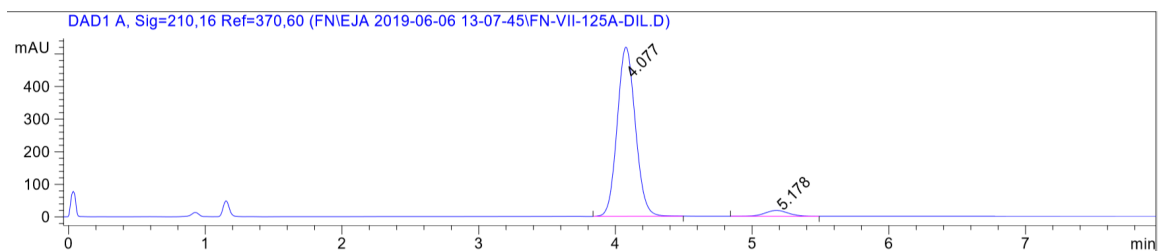

Signal 1: DAD1 A, Sig=210,16 Ref=370,60

| Peak # | RetTime [min] | Type | Width [min] | Area [mAU*s] | Height [mAU] | Area %  |
|--------|---------------|------|-------------|--------------|--------------|---------|
| 1      | 4.077         | BB   | 0.1435      | 4781.52539   | 519.04926    | 95.7798 |
| 2      | 5.178         | VB   | 0.1778      | 210.68056    | 18.09942     | 4.2202  |

## Racemic **8d**•Cbz

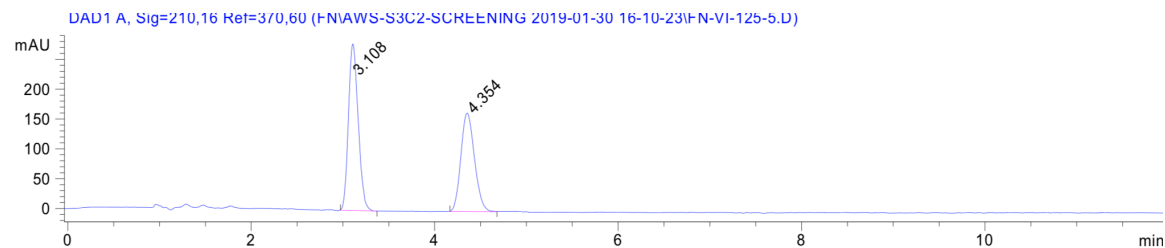

Signal 1: DAD1 A, Sig=210,16 Ref=370,60

| Peak # | RetTime [min] | Type | Width [min] | Area [mAU*s] | Height [mAU] | Area %  |
|--------|---------------|------|-------------|--------------|--------------|---------|
| 1      | 3.108         | BB   | 0.1143      | 2061.14478   | 278.61850    | 54.7029 |
| 2      | 4.354         | BB   | 0.1608      | 1706.74719   | 164.80942    | 45.2971 |

## Enantioenriched **8d**•Cbz

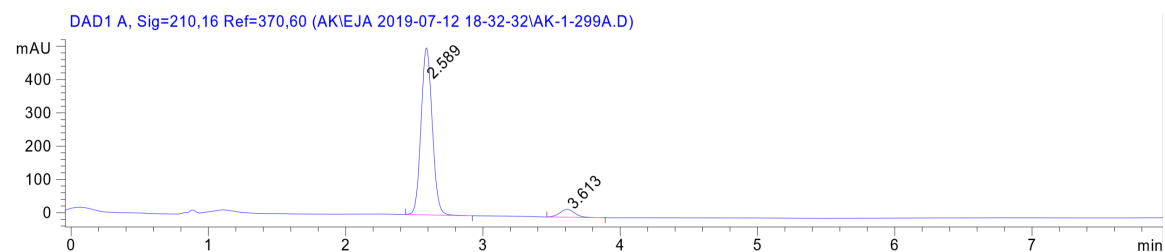

Signal 1: DAD1 A, Sig=210,16 Ref=370,60

| Peak # | RetTime [min] | Type | Width [min] | Area [mAU*s] | Height [mAU] | Area %  |
|--------|---------------|------|-------------|--------------|--------------|---------|
| 1      | 2.589         | BB   | 0.0881      | 2843.16016   | 502.08252    | 94.1881 |
| 2      | 3.613         | BB   | 0.1167      | 175.43710    | 23.59426     | 5.8119  |

## Racemic **8e**•Cbz

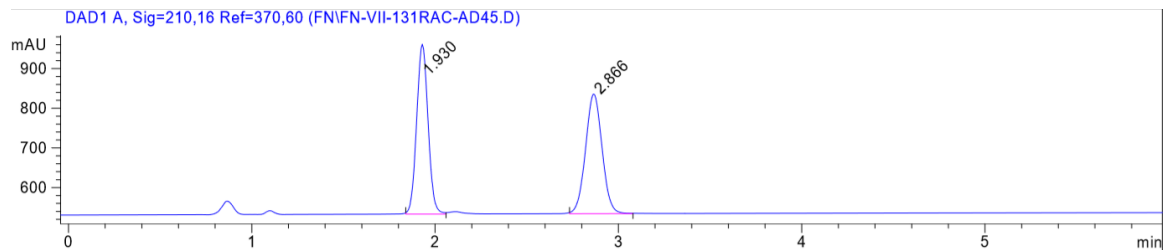

Signal 1: DAD1 A, Sig=210,16 Ref=370,60

| Peak # | RetTime [min] | Type | Width [min] | Area [mAU*s] | Height [mAU] | Area %  |
|--------|---------------|------|-------------|--------------|--------------|---------|
| 1      | 1.930         | BV   | 0.0708      | 1849.34583   | 424.51587    | 49.3594 |
| 2      | 2.866         | BB   | 0.1015      | 1897.34631   | 301.09756    | 50.6406 |

## Enantioenriched 8e•Cbz

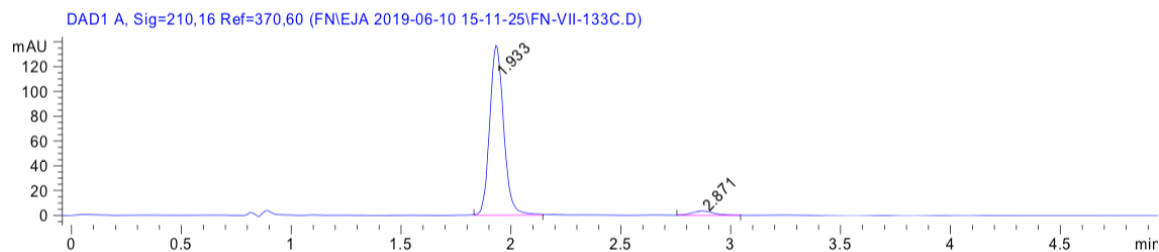

Signal 1: DAD1 A, Sig=210,16 Ref=370,60

| Peak # | RetTime [min] | Type | Width [min] | Area [mAU*s] | Height [mAU] | Area %  |
|--------|---------------|------|-------------|--------------|--------------|---------|
| 1      | 1.933         | BB   | 0.0676      | 606.81042    | 137.18159    | 96.4113 |
| 2      | 2.871         | BB   | 0.0969      | 22.58703     | 3.51686      | 3.5887  |

## Racemic 8f•Cbz

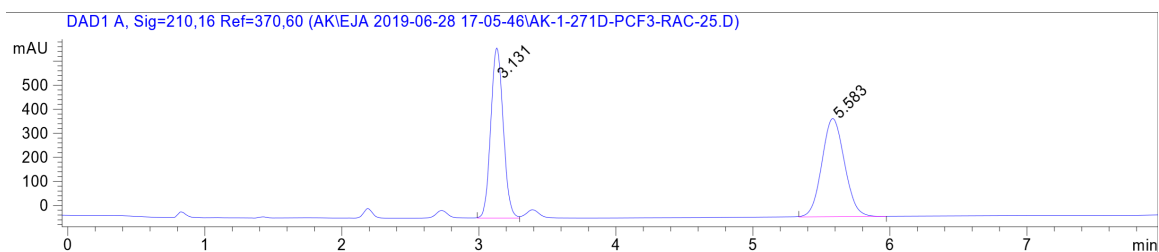

Signal 1: DAD1 A, Sig=210,16 Ref=370,60

| Peak # | RetTime [min] | Type | Width [min] | Area [mAU*s] | Height [mAU] | Area %  |
|--------|---------------|------|-------------|--------------|--------------|---------|
| 1      | 3.131         | BV   | 0.0980      | 4470.82178   | 704.84247    | 48.8296 |
| 2      | 5.583         | BB   | 0.1821      | 4685.14355   | 407.61465    | 51.1704 |

## Enantioenriched 8f•Cbz

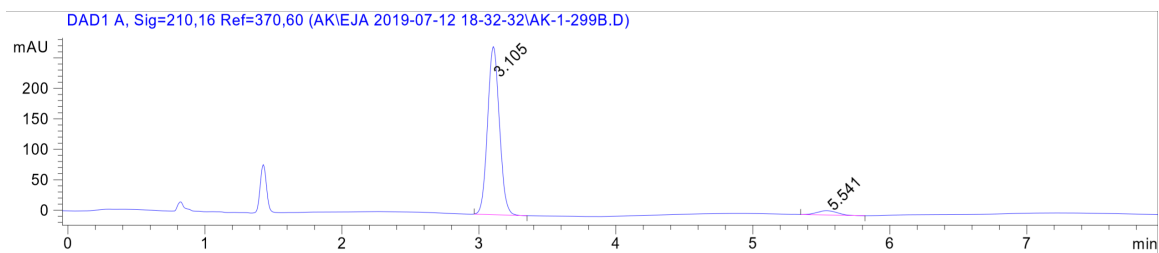

Signal 1: DAD1 A, Sig=210,16 Ref=370,60

| Peak # | RetTime [min] | Type | Width [min] | Area [mAU*s] | Height [mAU] | Area %  |
|--------|---------------|------|-------------|--------------|--------------|---------|
| 1      | 3.105         | BB   | 0.0920      | 1656.91443   | 276.13840    | 95.9298 |
| 2      | 5.541         | BB   | 0.1475      | 70.30067     | 7.09913      | 4.0702  |

## Racemic 8g•Cbz

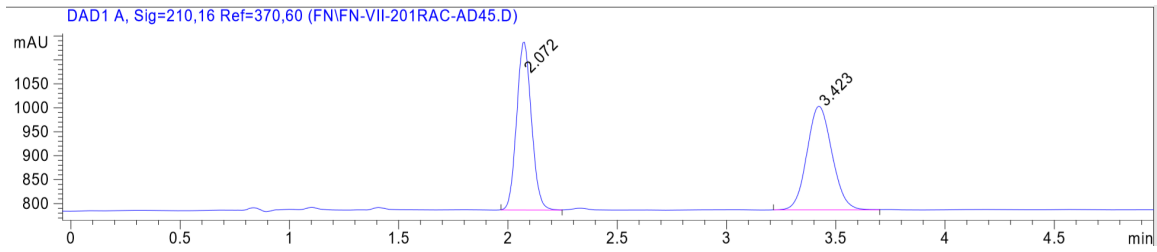

Signal 1: DAD1 A, Sig=210,16 Ref=370,60

| Peak # | RetTime [min] | Type | Width [min] | Area [mAU*s] | Height [mAU] | Area %  |
|--------|---------------|------|-------------|--------------|--------------|---------|
| 1      | 2.072         | BV   | 0.0750      | 1656.99988   | 351.78995    | 48.9589 |
| 2      | 3.423         | BB   | 0.1251      | 1727.47400   | 216.40314    | 51.0411 |

## Enantioenriched 8g•Cbz

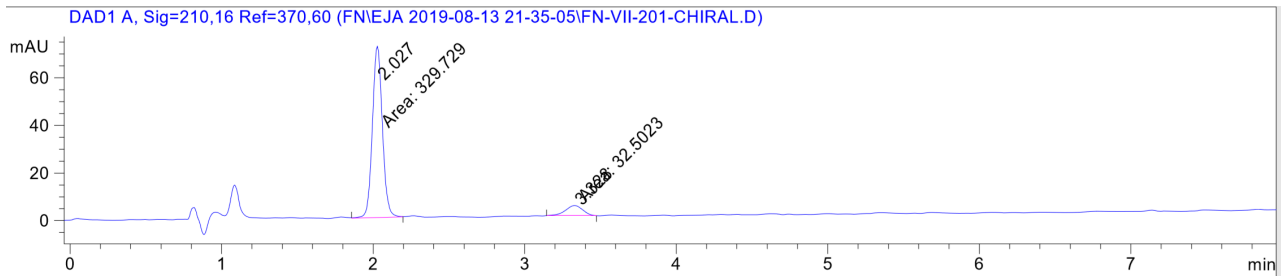

Signal 1: DAD1 A, Sig=210,16 Ref=370,60

| Peak # | RetTime [min] | Type | Width [min] | Area [mAU*s] | Height [mAU] | Area %  |
|--------|---------------|------|-------------|--------------|--------------|---------|
| 1      | 2.027         | MM   | 0.0761      | 329.72919    | 72.18623     | 91.0272 |
| 2      | 3.328         | MM   | 0.1273      | 32.50227     | 4.25578      | 8.9728  |

## Racemic 8h•Cbz

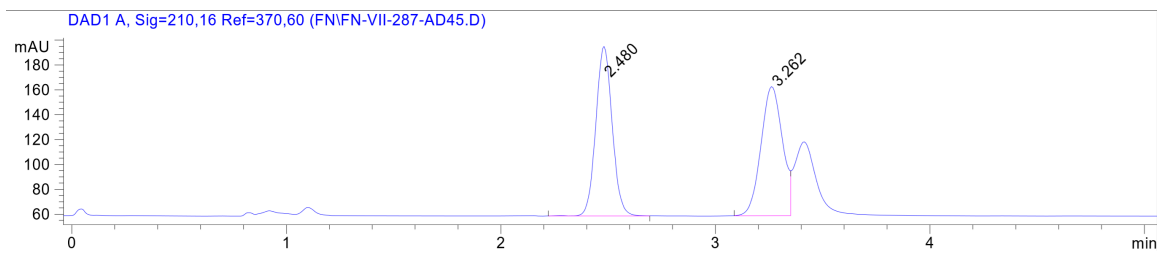

Signal 1: DAD1 A, Sig=210,16 Ref=370,60

| Peak # | RetTime [min] | Type | Width [min] | Area [mAU*s] | Height [mAU] | Area %  |
|--------|---------------|------|-------------|--------------|--------------|---------|
| 1      | 2.480         | BB   | 0.0820      | 725.99445    | 136.52641    | 50.0536 |
| 2      | 3.262         | BV   | 0.1073      | 724.44000    | 103.92244    | 49.9464 |

## Enantioenriched 8h•Cbz

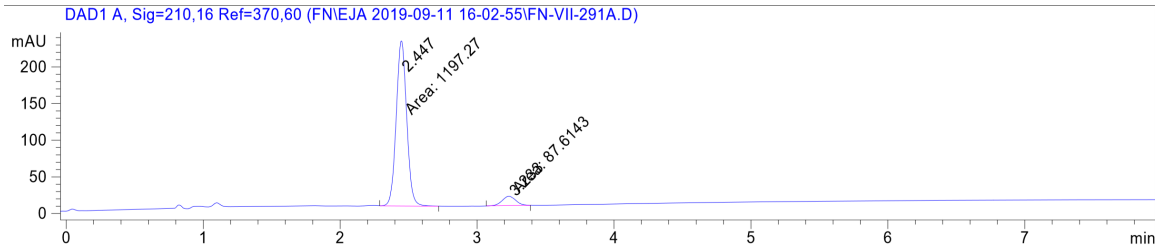

Signal 1: DAD1 A, Sig=210,16 Ref=370,60

| Peak # | RetTime [min] | Type | Width [min] | Area [mAU*s] | Height [mAU] | Area %  |
|--------|---------------|------|-------------|--------------|--------------|---------|
| 1      | 2.447         | MM   | 0.0881      | 1197.27063   | 226.37776    | 93.1812 |
| 2      | 3.233         | MM   | 0.1138      | 87.61434     | 12.83208     | 6.8188  |

## Racemic 8i•Cbz

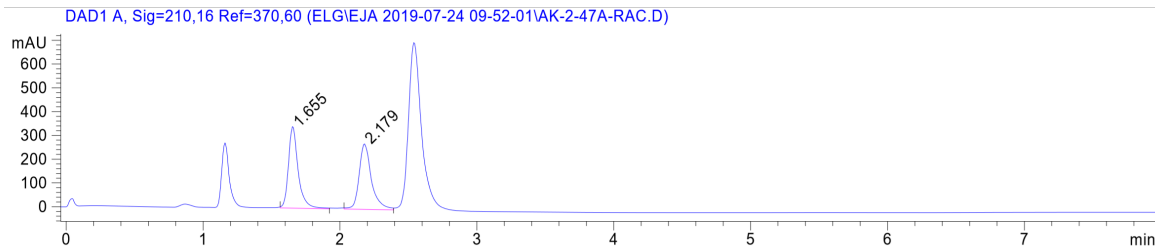

Signal 1: DAD1 A, Sig=210,16 Ref=370,60

| Peak # | RetTime [min] | Type | Width [min] | Area [mAU*s] | Height [mAU] | Area %  |
|--------|---------------|------|-------------|--------------|--------------|---------|
| 1      | 1.655         | BB   | 0.0780      | 1695.18689   | 340.95029    | 49.6001 |
| 2      | 2.179         | BV   | 0.0931      | 1722.52197   | 275.01672    | 50.3999 |

## Enantioenriched 8i•Cbz

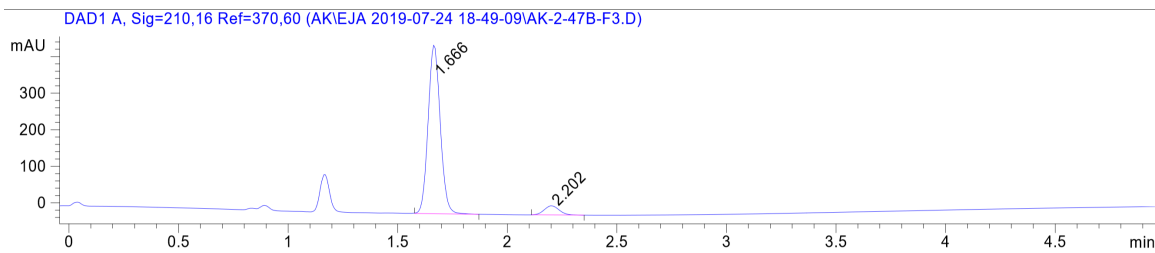

Signal 1: DAD1 A, Sig=210,16 Ref=370,60

| Peak # | RetTime [min] | Type | Width [min] | Area [mAU*s] | Height [mAU] | Area %  |
|--------|---------------|------|-------------|--------------|--------------|---------|
| 1      | 1.666         | BB   | 0.0609      | 1779.05176   | 461.77499    | 93.7135 |
| 2      | 2.202         | BB   | 0.0729      | 119.34183    | 25.36208     | 6.2865  |



## Racemic 8j•Cbz

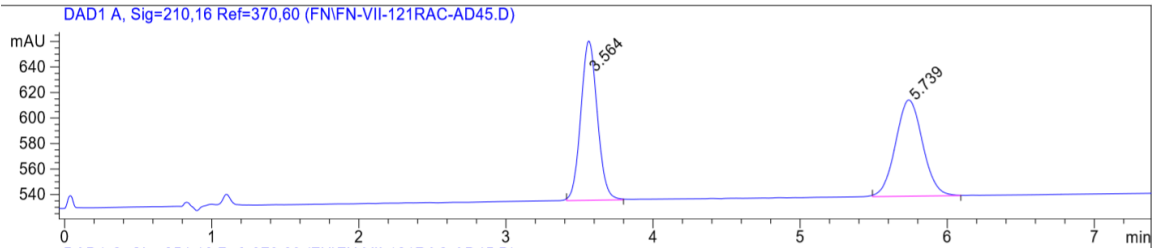

Signal 1: DAD1 A, Sig=210,16 Ref=370,60

| Peak # | RetTime [min] | Type | Width [min] | Area [mAU*s] | Height [mAU] | Area %  |
|--------|---------------|------|-------------|--------------|--------------|---------|
| 1      | 3.564         | BB   | 0.1231      | 973.81842    | 124.71865    | 50.1687 |
| 2      | 5.739         | BB   | 0.1977      | 967.27094    | 75.39081     | 49.8313 |

## Enantioenriched 8j•Cbz

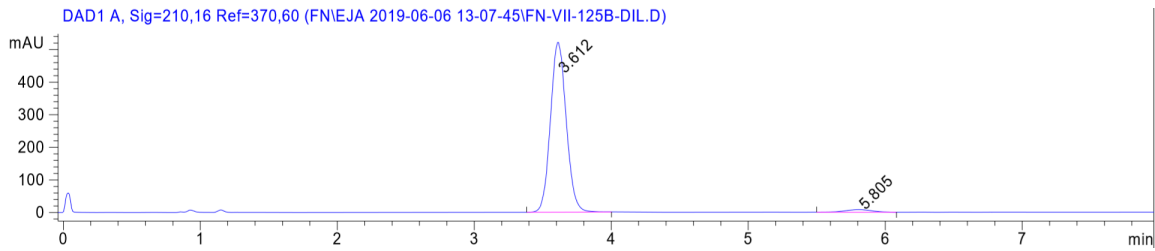

Signal 1: DAD1 A, Sig=210,16 Ref=370,60

| Peak # | RetTime [min] | Type | Width [min] | Area [mAU*s] | Height [mAU] | Area %  |
|--------|---------------|------|-------------|--------------|--------------|---------|
| 1      | 3.612         | BB   | 0.1254      | 4178.18115   | 521.86456    | 97.4007 |
| 2      | 5.805         | BV   | 0.1948      | 111.50051    | 8.29716      | 2.5993  |

## Racemic 8k•Cbz

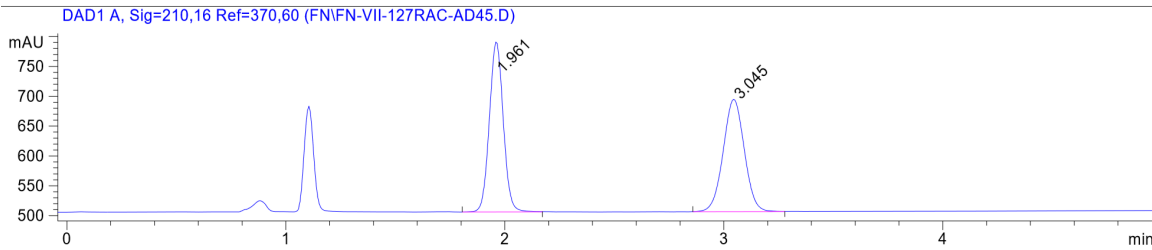

Signal 1: DAD1 A, Sig=210,16 Ref=370,60

| Peak # | RetTime [min] | Type | Width [min] | Area [mAU*s] | Height [mAU] | Area %  |
|--------|---------------|------|-------------|--------------|--------------|---------|
| 1      | 1.961         | VB   | 0.0674      | 1257.14734   | 285.41742    | 49.8960 |
| 2      | 3.045         | BB   | 0.1042      | 1262.38831   | 188.33221    | 50.1040 |

## Enantioenriched 8k•Cbz

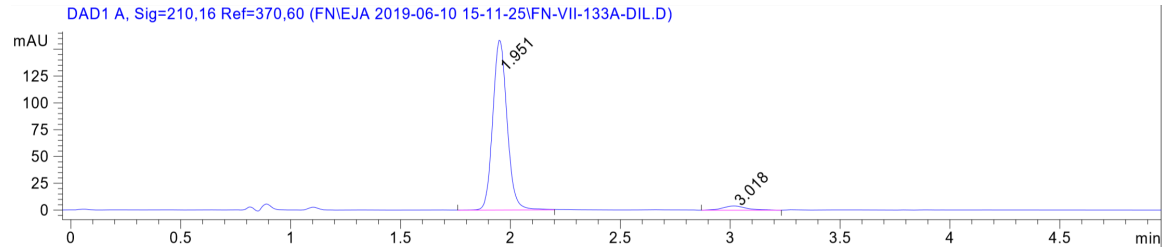

Signal 1: DAD1 A, Sig=210,16 Ref=370,60

| Peak # | RetTime [min] | Type | Width [min] | Area [mAU*s] | Height [mAU] | Area %  |
|--------|---------------|------|-------------|--------------|--------------|---------|
| 1      | 1.951         | VB   | 0.0687      | 718.81940    | 159.04907    | 95.9575 |
| 2      | 3.018         | BV   | 0.1136      | 30.28240     | 4.03425      | 4.0425  |

## Racemic 8l•Cbz

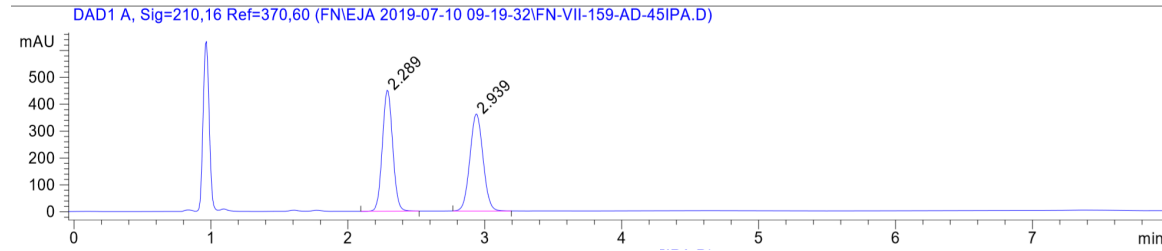

Signal 1: DAD1 A, Sig=210,16 Ref=370,60

| Peak # | RetTime [min] | Type | Width [min] | Area [mAU*s] | Height [mAU] | Area %  |
|--------|---------------|------|-------------|--------------|--------------|---------|
| 1      | 2.289         | BB   | 0.0811      | 2358.96533   | 450.59644    | 49.5114 |
| 2      | 2.939         | BB   | 0.1037      | 2405.52295   | 361.37506    | 50.4886 |

## Enantioenriched 8l•Cbz

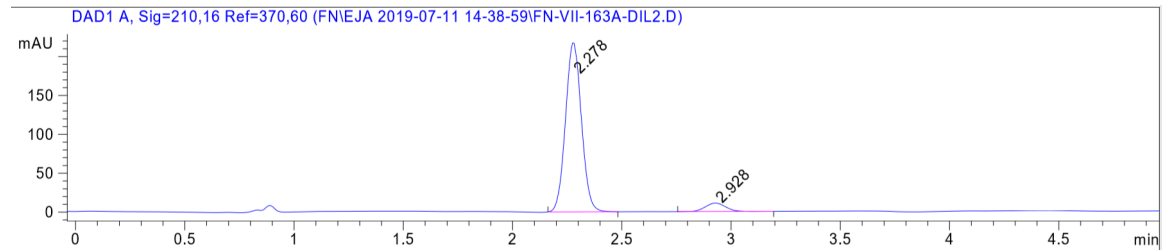

Signal 1: DAD1 A, Sig=210,16 Ref=370,60

| Peak # | RetTime [min] | Type | Width [min] | Area [mAU*s] | Height [mAU] | Area %  |
|--------|---------------|------|-------------|--------------|--------------|---------|
| 1      | 2.278         | BB   | 0.0790      | 1102.16956   | 218.12439    | 94.1062 |
| 2      | 2.928         | BB   | 0.0994      | 69.02821     | 10.96723     | 5.8938  |

## Racemic 8m•Cbz

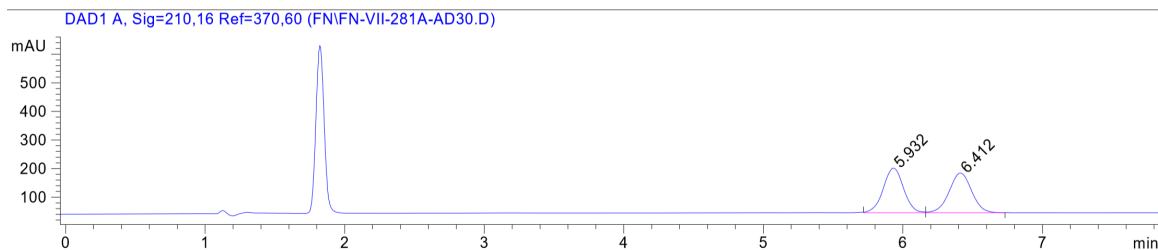

Signal 1: DAD1 A, Sig=210,16 Ref=370,60

| Peak # | RetTime [min] | Type | Width [min] | Area [mAU*s] | Height [mAU] | Area %  |
|--------|---------------|------|-------------|--------------|--------------|---------|
| 1      | 5.932         | BV   | 0.1541      | 1584.34717   | 156.53989    | 50.4165 |
| 2      | 6.412         | VB   | 0.1748      | 1558.16772   | 139.03162    | 49.5835 |

## Enantioenriched 8m•Cbz

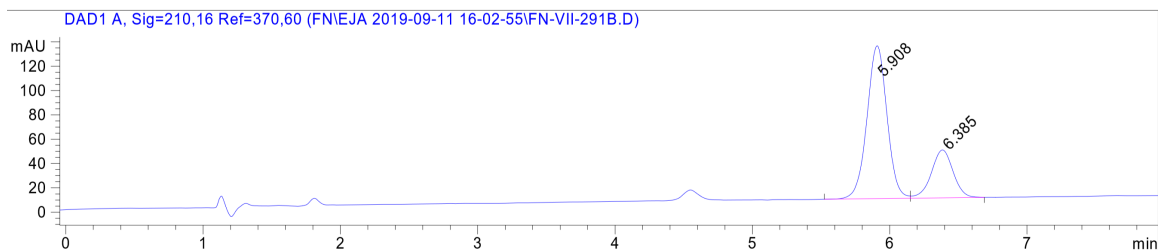

Signal 1: DAD1 A, Sig=210,16 Ref=370,60

| Peak # | RetTime [min] | Type | Width [min] | Area [mAU*s] | Height [mAU] | Area %  |
|--------|---------------|------|-------------|--------------|--------------|---------|
| 1      | 5.908         | BV   | 0.1561      | 1272.85767   | 125.74207    | 74.5442 |
| 2      | 6.385         | VB   | 0.1686      | 434.66418    | 39.41822     | 25.4558 |

## Racemic 8n•Cbz

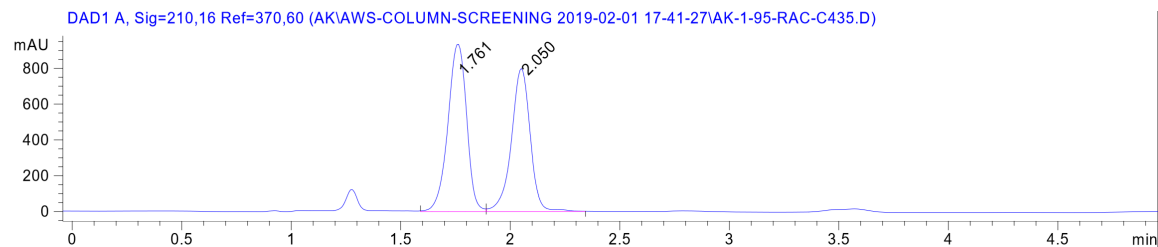

Signal 1: DAD1 A, Sig=210,16 Ref=370,60

| Peak # | RetTime [min] | Type | Width [min] | Area [mAU*s] | Height [mAU] | Area %  |
|--------|---------------|------|-------------|--------------|--------------|---------|
| 1      | 1.761         | BV   | 0.0933      | 5567.44824   | 937.00757    | 53.7908 |
| 2      | 2.050         | VB   | 0.0918      | 4782.73486   | 799.48718    | 46.2092 |

## Enantioenriched 8n•Cbz

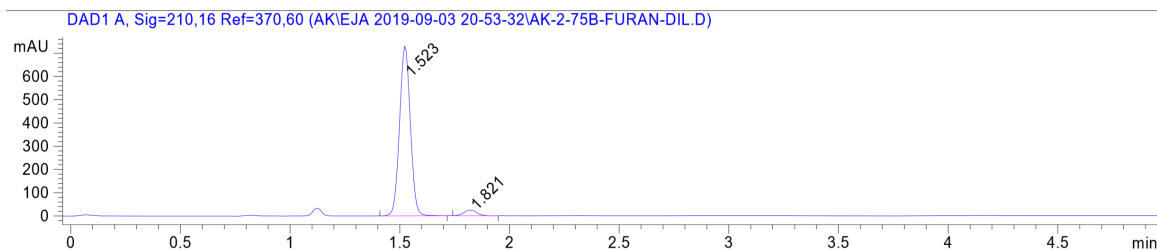

Signal 1: DAD1 A, Sig=210,16 Ref=370,60

| Peak # | RetTime [min] | Type | Width [min] | Area [mAU*s] | Height [mAU] | Area %  |
|--------|---------------|------|-------------|--------------|--------------|---------|
| 1      | 1.523         | BB   | 0.0540      | 2507.61743   | 731.10217    | 95.9818 |
| 2      | 1.821         | BB   | 0.0641      | 104.97870    | 25.48206     | 4.0182  |

## Racemic 8o•Cbz

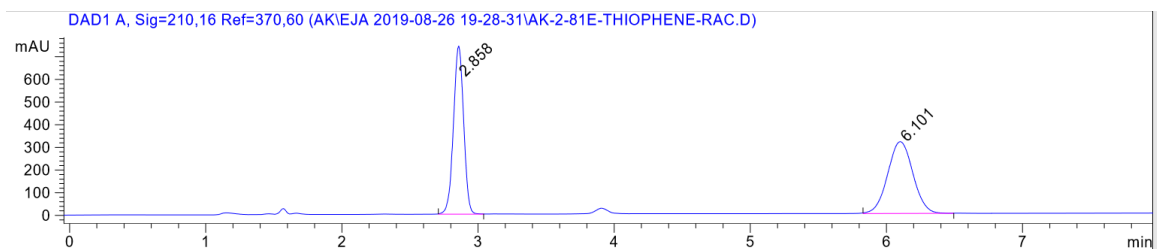

Signal 1: DAD1 A, Sig=210,16 Ref=370,60

| Peak # | RetTime [min] | Type | Width [min] | Area [mAU*s] | Height [mAU] | Area %  |
|--------|---------------|------|-------------|--------------|--------------|---------|
| 1      | 2.858         | BB   | 0.0809      | 3854.20142   | 738.73291    | 48.5294 |
| 2      | 6.101         | BB   | 0.1985      | 4087.78906   | 316.89798    | 51.4706 |

## Enantioenriched 8o•Cbz

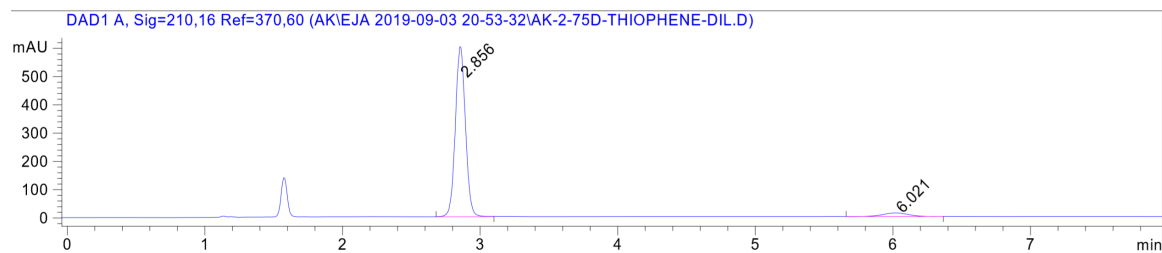

Signal 1: DAD1 A, Sig=210,16 Ref=370,60

| Peak # | RetTime [min] | Type | Width [min] | Area [mAU*s] | Height [mAU] | Area %  |
|--------|---------------|------|-------------|--------------|--------------|---------|
| 1      | 2.856         | BB   | 0.0794      | 3073.72705   | 603.51361    | 95.1667 |
| 2      | 6.021         | BB   | 0.1866      | 156.10904    | 12.59354     | 4.8333  |

## Racemic 8p•Cbz

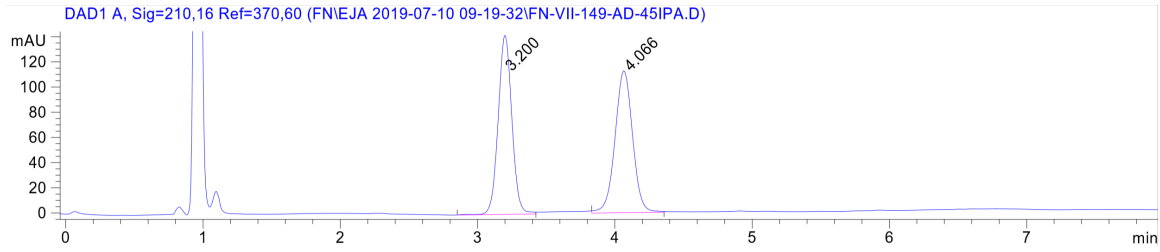

Signal 1: DAD1 A, Sig=210,16 Ref=370,60

| Peak # | RetTime [min] | Type | Width [min] | Area [mAU*s] | Height [mAU] | Area %  |
|--------|---------------|------|-------------|--------------|--------------|---------|
| 1      | 3.200         | BB   | 0.1065      | 981.89862    | 142.25697    | 49.4769 |
| 2      | 4.066         | BB   | 0.1378      | 1002.66058   | 112.71777    | 50.5231 |

## Enantioenriched 8p•Cbz

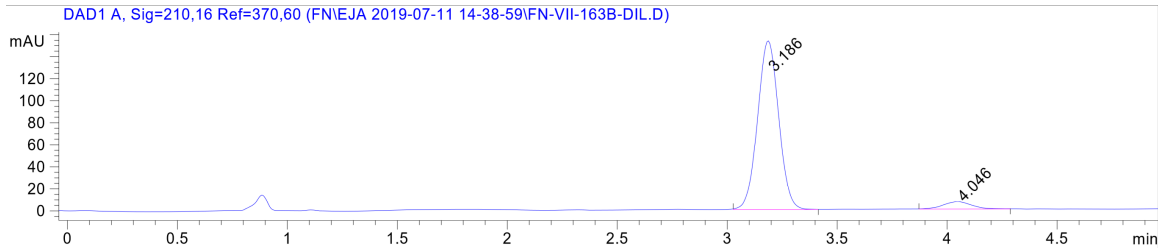

Signal 1: DAD1 A, Sig=210,16 Ref=370,60

| Peak # | RetTime [min] | Type | Width [min] | Area [mAU*s] | Height [mAU] | Area %  |
|--------|---------------|------|-------------|--------------|--------------|---------|
| 1      | 3.186         | BB   | 0.1037      | 1020.52930   | 153.26720    | 94.3455 |
| 2      | 4.046         | BB   | 0.1415      | 61.16384     | 6.76278      | 5.6545  |

## Racemic 8q•Cbz

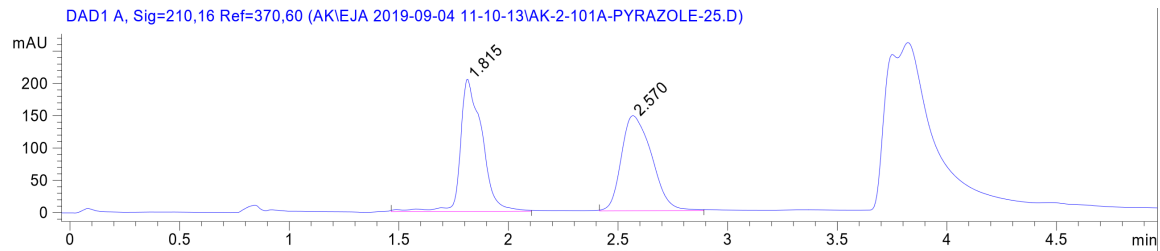

Signal 1: DAD1 A, Sig=210,16 Ref=370,60

| Peak # | RetTime [min] | Type | Width [min] | Area [mAU*s] | Height [mAU] | Area %  |
|--------|---------------|------|-------------|--------------|--------------|---------|
| 1      | 1.815         | BB   | 0.0964      | 1416.28662   | 205.47318    | 50.0412 |
| 2      | 2.570         | BB   | 0.1604      | 1413.95361   | 146.76917    | 49.9588 |

## Enantioenriched **8q**•Cbz

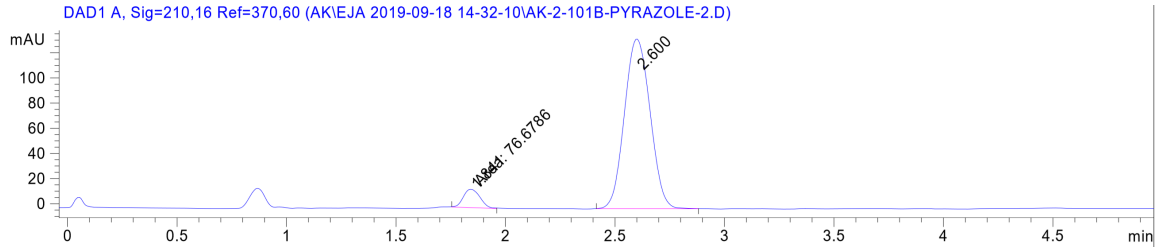

Signal 1: DAD1 A, Sig=210,16 Ref=370,60

| Peak # | RetTime [min] | Type | Width [min] | Area [mAU*s] | Height [mAU] | Area %  |
|--------|---------------|------|-------------|--------------|--------------|---------|
| 1      | 1.841         | MM   | 0.0872      | 76.67860     | 14.65488     | 6.5141  |
| 2      | 2.600         | BB   | 0.1291      | 1100.44189   | 135.06032    | 93.4859 |

## Racemic **8r**•Cbz

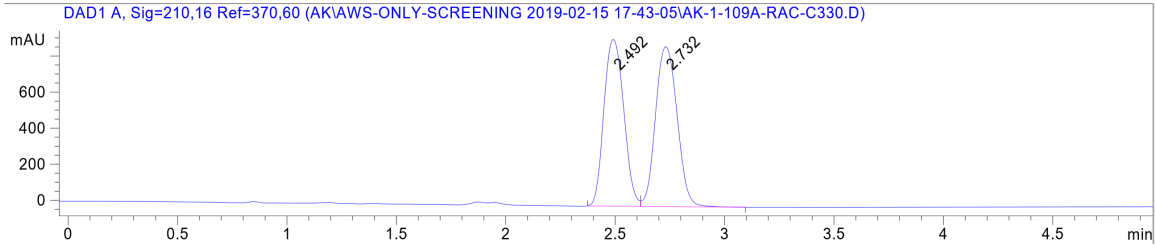

Signal 1: DAD1 A, Sig=210,16 Ref=370,60

| Peak # | RetTime [min] | Type | Width [min] | Area [mAU*s] | Height [mAU] | Area %  |
|--------|---------------|------|-------------|--------------|--------------|---------|
| 1      | 2.492         | BV   | 0.1016      | 5821.55029   | 922.38538    | 48.8926 |
| 2      | 2.732         | VB   | 0.1082      | 6085.25879   | 885.50177    | 51.1074 |

## Enantioenriched **8r**•Cbz

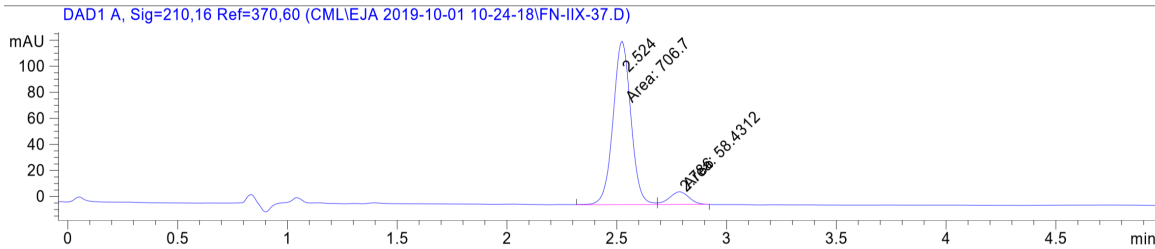

Signal 1: DAD1 A, Sig=210,16 Ref=370,60

| Peak # | RetTime [min] | Type | Width [min] | Area [mAU*s] | Height [mAU] | Area %  |
|--------|---------------|------|-------------|--------------|--------------|---------|
| 1      | 2.524         | MF   | 0.0937      | 706.70044    | 125.69700    | 92.3632 |
| 2      | 2.786         | FM   | 0.1009      | 58.43125     | 9.65216      | 7.6368  |

## Racemic 10a•Cbz

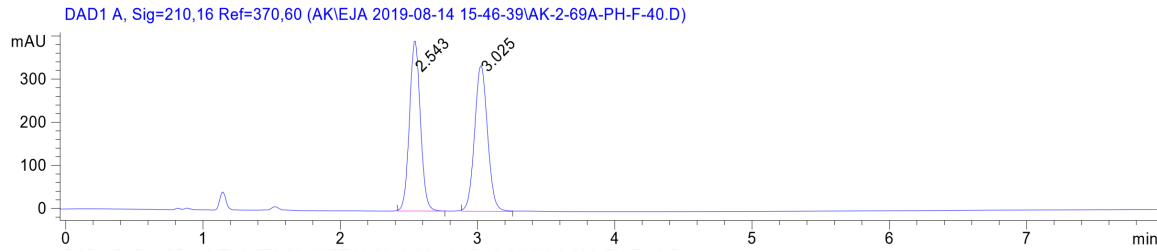

Signal 1: DAD1 A, Sig=210,16 Ref=370,60

| Peak # | RetTime [min] | Type | Width [min] | Area [mAU*s] | Height [mAU] | Area %  |
|--------|---------------|------|-------------|--------------|--------------|---------|
| 1      | 2.543         | BB   | 0.0891      | 2190.28516   | 392.62985    | 49.6934 |
| 2      | 3.025         | BB   | 0.1008      | 2217.31665   | 336.81812    | 50.3066 |

## Enantioenriched 10a•Cbz

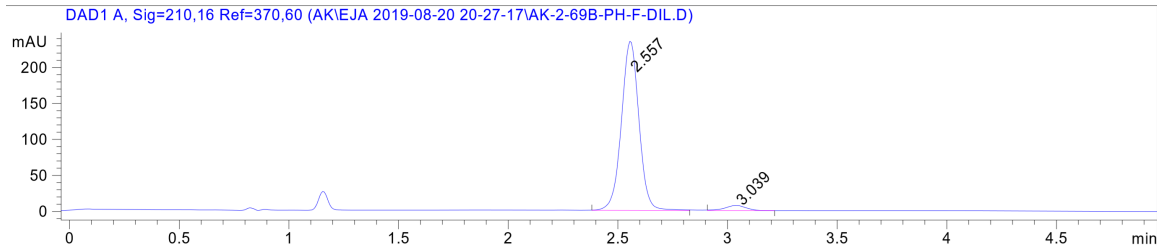

Signal 1: DAD1 A, Sig=210,16 Ref=370,60

| Peak # | RetTime [min] | Type | Width [min] | Area [mAU*s] | Height [mAU] | Area %  |
|--------|---------------|------|-------------|--------------|--------------|---------|
| 1      | 2.557         | BB   | 0.0848      | 1307.88232   | 235.36581    | 96.4332 |
| 2      | 3.039         | BB   | 0.1029      | 48.37504     | 7.15398      | 3.5668  |

## Racemic 10b•Cbz

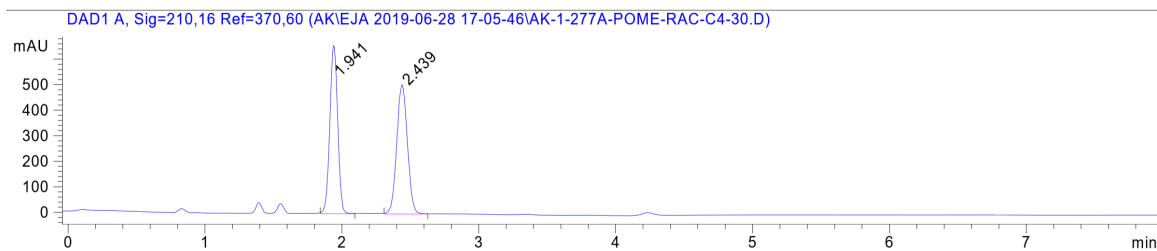

Signal 1: DAD1 A, Sig=210,16 Ref=370,60

| Peak # | RetTime [min] | Type | Width [min] | Area [mAU*s] | Height [mAU] | Area %  |
|--------|---------------|------|-------------|--------------|--------------|---------|
| 1      | 1.941         | BB   | 0.0632      | 2637.20605   | 652.49164    | 48.9944 |
| 2      | 2.439         | BB   | 0.0835      | 2745.45801   | 504.47842    | 51.0056 |

## Enantioenriched 10b•Cbz

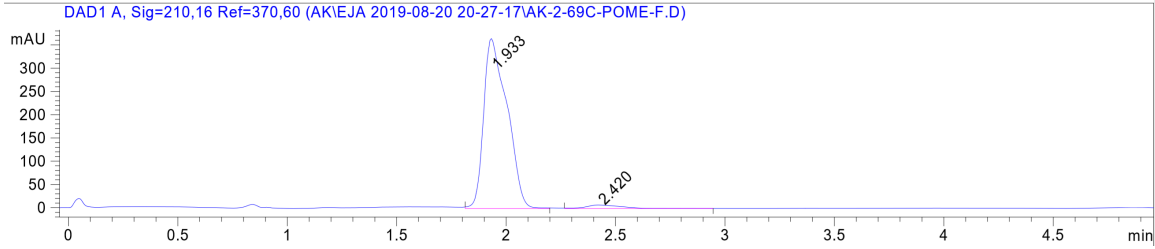

Signal 1: DAD1 A, Sig=210,16 Ref=370,60

| Peak # | RetTime [min] | Type | Width [min] | Area [mAU*s] | Height [mAU] | Area %  |
|--------|---------------|------|-------------|--------------|--------------|---------|
| 1      | 1.933         | BB   | 0.1048      | 2717.86035   | 365.49832    | 96.9924 |
| 2      | 2.420         | BB   | 0.1516      | 84.27748     | 7.58419      | 3.0076  |

## Racemic 10c•Cbz

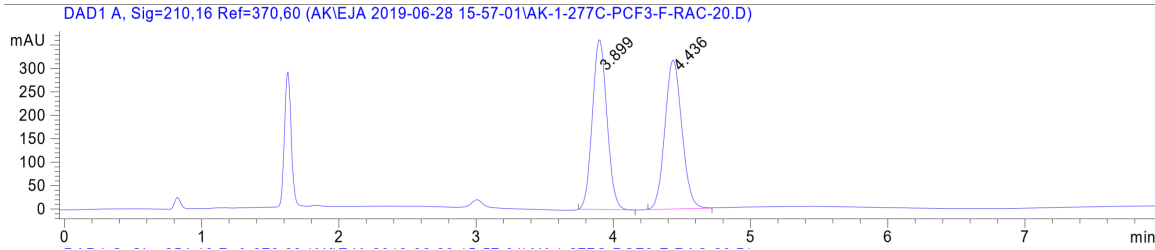

Signal 1: DAD1 A, Sig=210,16 Ref=370,60

| Peak # | RetTime [min] | Type | Width [min] | Area [mAU*s] | Height [mAU] | Area %  |
|--------|---------------|------|-------------|--------------|--------------|---------|
| 1      | 3.899         | BB   | 0.1183      | 2674.89038   | 361.63055    | 49.4474 |
| 2      | 4.436         | BB   | 0.1364      | 2734.68140   | 317.63568    | 50.5526 |

## Enantioenriched 10c•Cbz

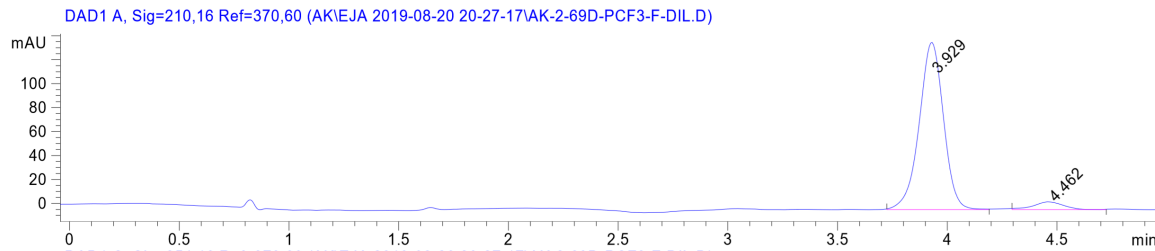

Signal 1: DAD1 A, Sig=210,16 Ref=370,60

| Peak # | RetTime [min] | Type | Width [min] | Area [mAU*s] | Height [mAU] | Area %  |
|--------|---------------|------|-------------|--------------|--------------|---------|
| 1      | 3.929         | BB   | 0.1179      | 1076.24158   | 139.70760    | 94.6188 |
| 2      | 4.462         | BB   | 0.1424      | 61.20900     | 6.46822      | 5.3812  |



## Racemic 10d•Cbz

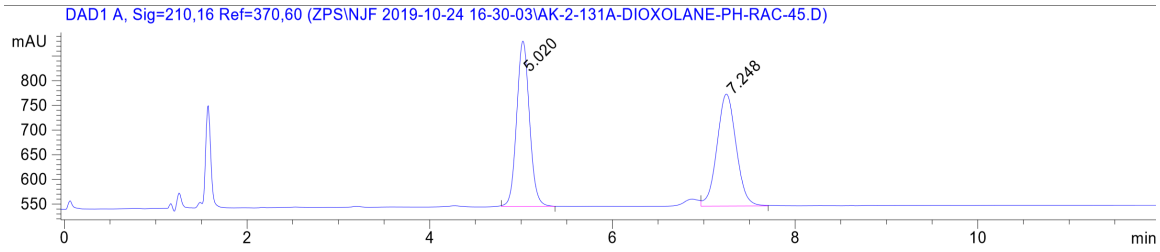

Signal 1: DAD1 A, Sig=210,16 Ref=370,60

| Peak # | RetTime [min] | Type | Width [min] | Area [mAU*s] | Height [mAU] | Area %  |
|--------|---------------|------|-------------|--------------|--------------|---------|
| 1      | 5.020         | BB   | 0.1540      | 3273.37476   | 334.94397    | 49.7505 |
| 2      | 7.248         | VB   | 0.2260      | 3306.21167   | 226.86429    | 50.2495 |

## Enantioenriched 10d•Cbz

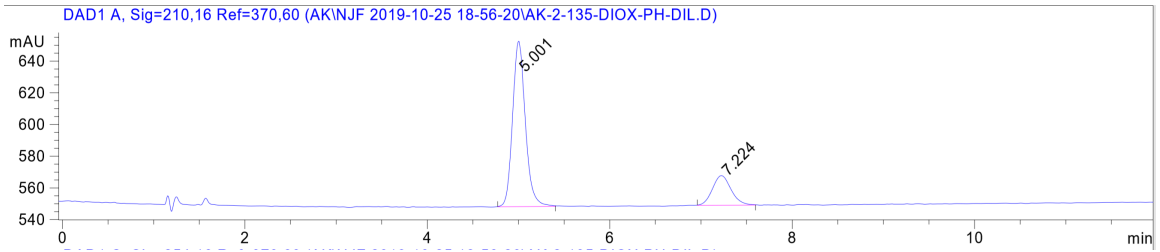

Signal 1: DAD1 A, Sig=210,16 Ref=370,60

| Peak # | RetTime [min] | Type | Width [min] | Area [mAU*s] | Height [mAU] | Area %  |
|--------|---------------|------|-------------|--------------|--------------|---------|
| 1      | 5.001         | BB   | 0.1472      | 1013.64154   | 104.43392    | 79.2472 |
| 2      | 7.224         | BB   | 0.2156      | 265.44623    | 18.70652     | 20.7528 |

## Racemic 10e•Cbz

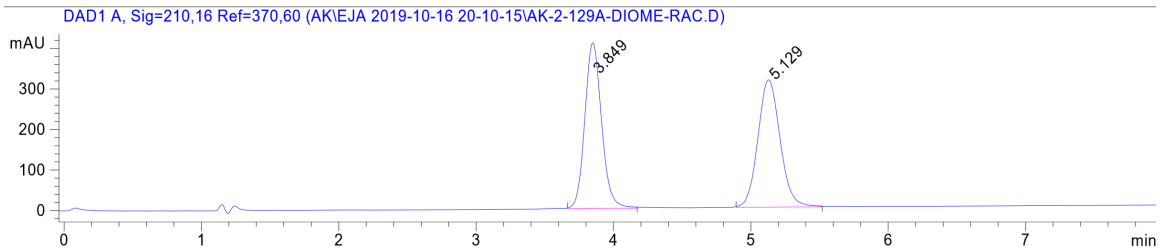

Signal 1: DAD1 A, Sig=210,16 Ref=370,60

| Peak # | RetTime [min] | Type | Width [min] | Area [mAU*s] | Height [mAU] | Area %  |
|--------|---------------|------|-------------|--------------|--------------|---------|
| 1      | 3.849         | BB   | 0.1310      | 3464.39844   | 408.41620    | 49.5651 |
| 2      | 5.129         | BB   | 0.1749      | 3525.19043   | 314.15067    | 50.4349 |

## Enantioenriched 10e•Cbz

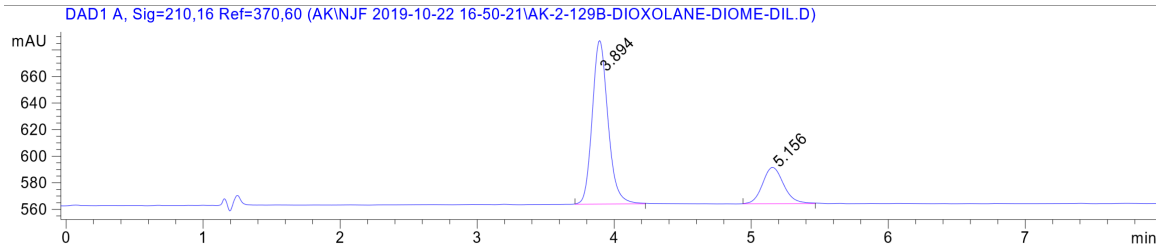

Signal 1: DAD1 A, Sig=210,16 Ref=370,60

| Peak # | RetTime [min] | Type | Width [min] | Area [mAU*s] | Height [mAU] | Area %  |
|--------|---------------|------|-------------|--------------|--------------|---------|
| 1      | 3.894         | BB   | 0.1232      | 984.75873    | 123.21400    | 77.0345 |
| 2      | 5.156         | BB   | 0.1627      | 293.57529    | 27.45859     | 22.9655 |

## Racemic 10f•Cbz

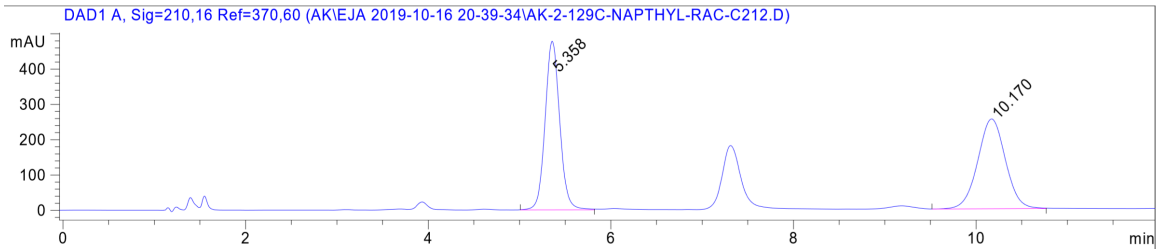

Signal 1: DAD1 A, Sig=210,16 Ref=370,60

| Peak # | RetTime [min] | Type | Width [min] | Area [mAU*s] | Height [mAU] | Area %  |
|--------|---------------|------|-------------|--------------|--------------|---------|
| 1      | 5.358         | BB   | 0.1693      | 5294.22119   | 477.65454    | 49.7768 |
| 2      | 10.170        | VB   | 0.3231      | 5341.70605   | 254.29431    | 50.2232 |

## Enantioenriched 10f•Cbz

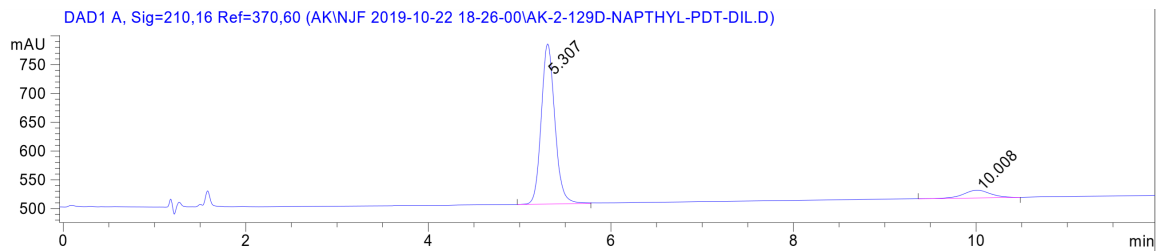

Signal 1: DAD1 A, Sig=210,16 Ref=370,60

| Peak # | RetTime [min] | Type | Width [min] | Area [mAU*s] | Height [mAU] | Area %  |
|--------|---------------|------|-------------|--------------|--------------|---------|
| 1      | 5.307         | BB   | 0.1589      | 2883.06396   | 278.23975    | 91.1323 |
| 2      | 10.008        | BV   | 0.3114      | 280.54007    | 13.55918     | 8.8677  |

## Racemic 12a•Cbz

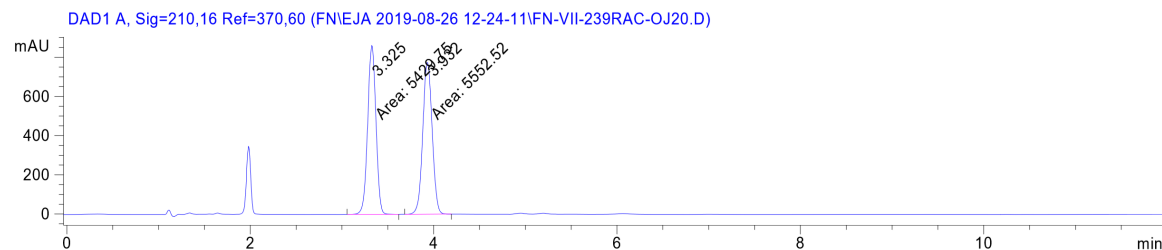

Signal 1: DAD1 A, Sig=210,16 Ref=370,60

| Peak # | RetTime [min] | Type | Width [min] | Area [mAU*s] | Height [mAU] | Area %  |
|--------|---------------|------|-------------|--------------|--------------|---------|
| 1      | 3.325         | MM   | 0.1045      | 5429.74902   | 866.15106    | 49.4411 |
| 2      | 3.932         | MM   | 0.1190      | 5552.51855   | 777.85889    | 50.5589 |

## Enantioenriched 12a•Cbz

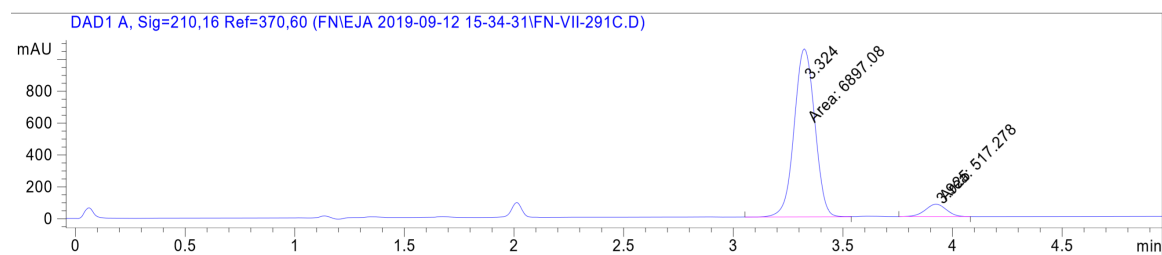

Signal 1: DAD1 A, Sig=210,16 Ref=370,60

| Peak # | RetTime [min] | Type | Width [min] | Area [mAU*s] | Height [mAU] | Area %  |
|--------|---------------|------|-------------|--------------|--------------|---------|
| 1      | 3.324         | MM   | 0.1085      | 6897.07910   | 1059.70032   | 93.0233 |
| 2      | 3.925         | MM   | 0.1103      | 517.27832    | 78.12787     | 6.9767  |

## Racemic 12b•Cbz

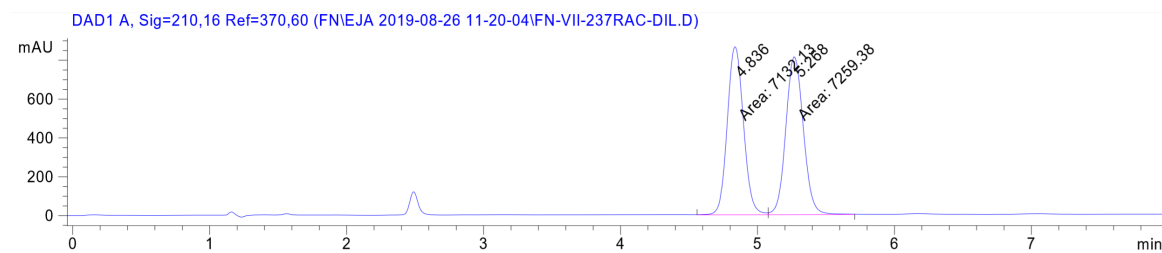

Signal 1: DAD1 A, Sig=210,16 Ref=370,60

| Peak # | RetTime [min] | Type | Width [min] | Area [mAU*s] | Height [mAU] | Area %  |
|--------|---------------|------|-------------|--------------|--------------|---------|
| 1      | 4.836         | MF   | 0.1369      | 7132.13086   | 868.20764    | 49.5579 |
| 2      | 5.268         | FM   | 0.1484      | 7259.37549   | 815.35889    | 50.4421 |

## Enantioenriched 12b•Cbz

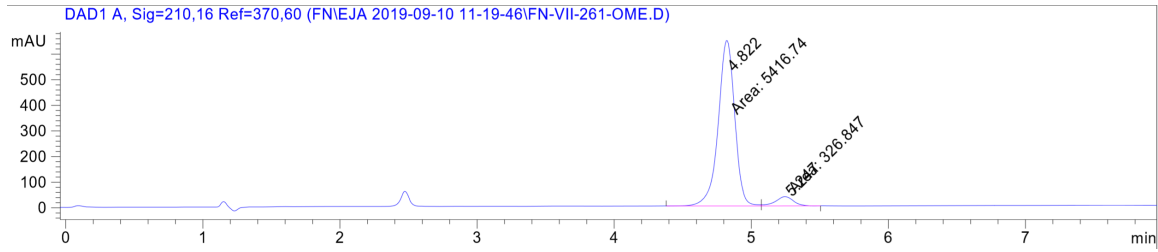

Signal 1: DAD1 A, Sig=210,16 Ref=370,60

| Peak # | RetTime [min] | Type | Width [min] | Area [mAU*s] | Height [mAU] | Area %  |
|--------|---------------|------|-------------|--------------|--------------|---------|
| 1      | 4.822         | MF   | 0.1393      | 5416.73535   | 648.23450    | 94.3094 |
| 2      | 5.247         | FM   | 0.1491      | 326.84689    | 36.52797     | 5.6906  |

## Racemic 10c•Cbz

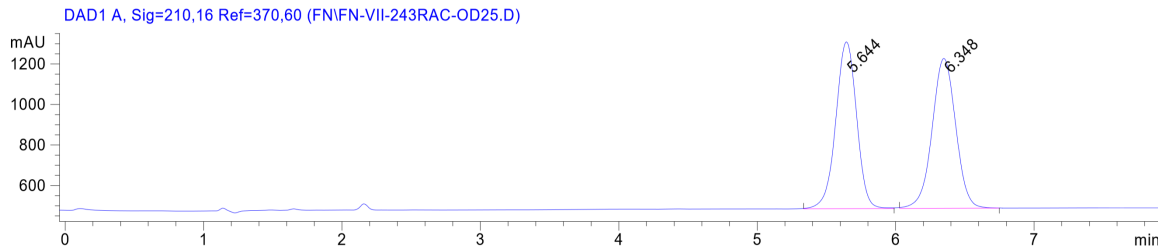

Signal 1: DAD1 A, Sig=210,16 Ref=370,60

| Peak # | RetTime [min] | Type | Width [min] | Area [mAU*s] | Height [mAU] | Area %  |
|--------|---------------|------|-------------|--------------|--------------|---------|
| 1      | 5.644         | BB   | 0.1623      | 8622.24121   | 822.63135    | 49.5394 |
| 2      | 6.348         | BB   | 0.1826      | 8782.58984   | 739.38312    | 50.4606 |

## Enantioenriched 10c•Cbz

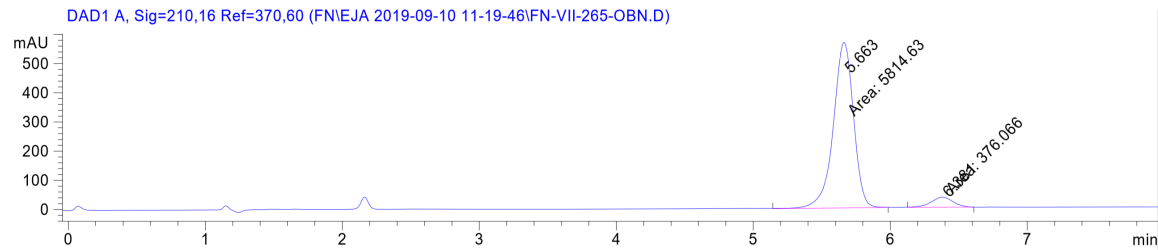

Signal 1: DAD1 A, Sig=210,16 Ref=370,60

| Peak # | RetTime [min] | Type | Width [min] | Area [mAU*s] | Height [mAU] | Area %  |
|--------|---------------|------|-------------|--------------|--------------|---------|
| 1      | 5.663         | MM   | 0.1704      | 5814.63037   | 568.69189    | 93.9253 |
| 2      | 6.381         | MM   | 0.1822      | 376.06619    | 34.40401     | 6.0747  |

## Racemic 10d•Cbz

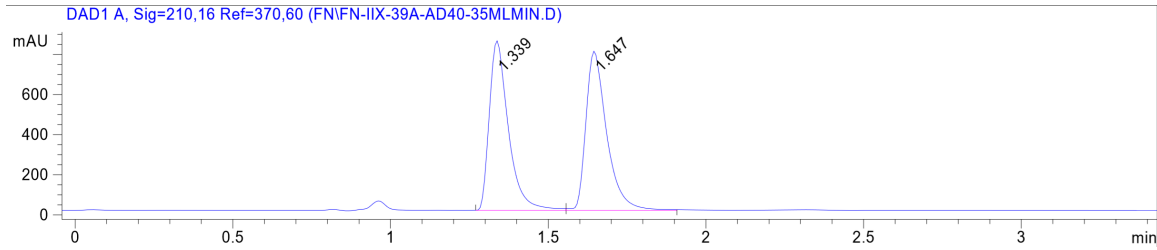

Signal 1: DAD1 A, Sig=210,16 Ref=370,60

| Peak # | RetTime [min] | Type | Width [min] | Area [mAU*s] | Height [mAU] | Area %  |
|--------|---------------|------|-------------|--------------|--------------|---------|
| 1      | 1.339         | BV   | 0.0654      | 3562.84033   | 841.34003    | 49.4402 |
| 2      | 1.647         | VB   | 0.0697      | 3643.52856   | 791.14252    | 50.5598 |

## Enantioenriched 10d•Cbz

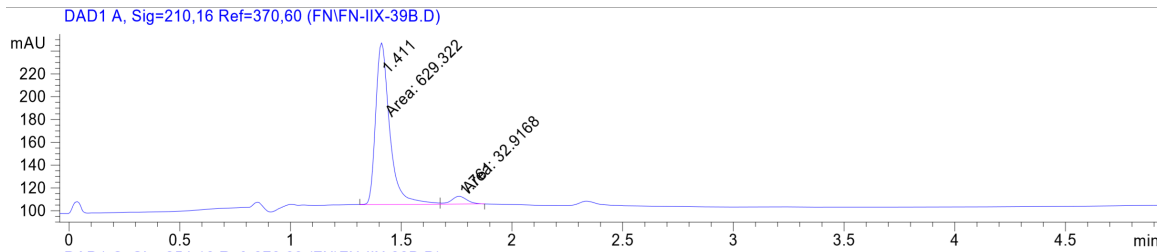

Signal 1: DAD1 A, Sig=210,16 Ref=370,60

| Peak # | RetTime [min] | Type | Width [min] | Area [mAU*s] | Height [mAU] | Area %  |
|--------|---------------|------|-------------|--------------|--------------|---------|
| 1      | 1.411         | MF   | 0.0737      | 629.32190    | 142.36954    | 95.0295 |
| 2      | 1.761         | FM   | 0.0794      | 32.91683     | 6.91080      | 4.9705  |

## Racemic 12e•Cbz

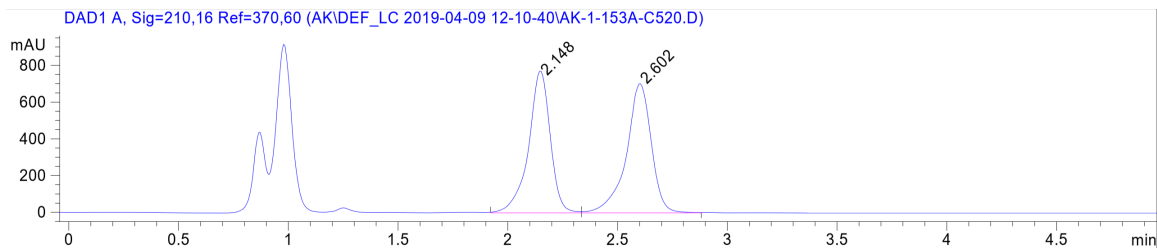

Signal 1: DAD1 A, Sig=210,16 Ref=370,60

| Peak # | RetTime [min] | Type | Width [min] | Area [mAU*s] | Height [mAU] | Area %  |
|--------|---------------|------|-------------|--------------|--------------|---------|
| 1      | 2.148         | BV   | 0.1044      | 5318.58984   | 771.45270    | 48.8723 |
| 2      | 2.602         | VB   | 0.1204      | 5564.02832   | 702.45618    | 51.1277 |

# Enantioenriched 12e•Cbz

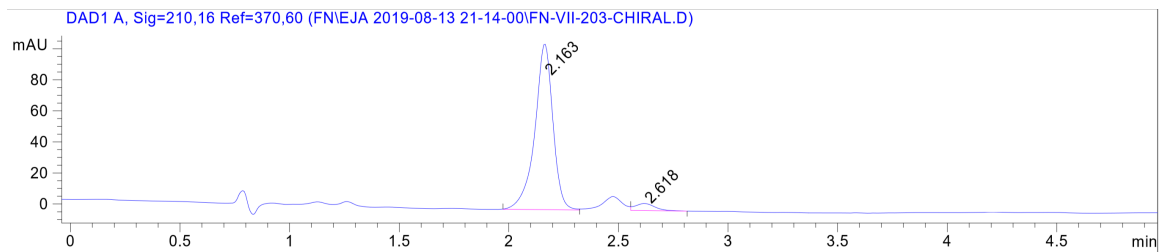

Signal 1: DAD1 A, Sig=210,16 Ref=370,60

| Peak # | RetTime [min] | Type | Width [min] | Area [mAU*s] | Height [mAU] | Area %  |
|--------|---------------|------|-------------|--------------|--------------|---------|
| 1      | 2.163         | BV   | 0.0868      | 612.66595    | 106.95222    | 95.4794 |
| 2      | 2.618         | VB   | 0.0928      | 29.00750     | 4.64774      | 4.5206  |
